# Supplementary material
Source: PubMed Central journal article supplement (PMC3097425)
Supplement: NIHMS292449-supplement-1_si_001.pdf [file NIHMS292449-supplement-1_si_001.pdf]

# Rapid Identification of Bacteria with a Disposable Colorimetric Sensing Array

James R. Carey,<sup>\*†</sup> Kenneth S. Suslick,<sup>\*‡</sup> Keren I. Hulkower,<sup>‡</sup> James A. Imlay,<sup>§</sup> Karin R. C. Imlay,<sup>§</sup>  
Crystal K. Ingison,<sup>‡</sup> Jennifer B. Ponder,<sup>‡</sup> Avijit Sen,<sup>‡</sup> and Aaron E. Wittrig<sup>‡</sup>

<sup>a</sup>Dept. of Applied Chemistry, National University of Kaohsiung, 700 Kaohsiung University Rd.,  
Kaosiung 811 Taiwan;

<sup>b</sup>Dept. of Chemistry, University of Illinois at Urbana-Champaign, 600 S. Mathews Avenue,  
Urbana, IL 61801; and

<sup>c</sup>Dept. of Microbiology, University of Illinois at Urbana-Champaign, 601 S. Goodwin Ave.,  
Urbana, IL 61801

\*To whom correspondence should be addressed: jcarey@nuk.edu.tw and ksuslick@illinois.edu

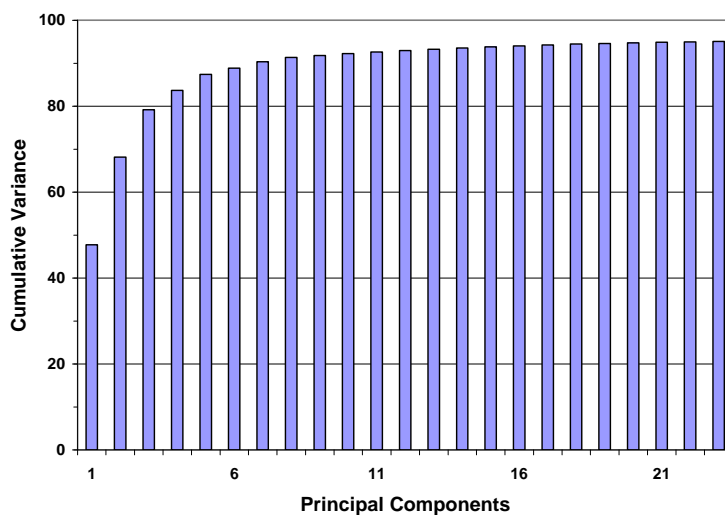

**Figure S1.** Scree plot showing the cumulative variance captured by each principal component in rank order. 7 and 23 principal components are required to capture 90% and 95% of the total variance, respectively.

**Table S1.** The dyes used in the colorimetric sensor array for bacterial identification.

|                                                       |                             |                    |                        |                             |                       |
|-------------------------------------------------------|-----------------------------|--------------------|------------------------|-----------------------------|-----------------------|
| ZnTMP                                                 | cresol red acid             | disperse orange 25 | cresol red basic       | bromothymol blue acid       | H <sub>2</sub> TPP    |
| Reichardt's dye                                       | methyl red acid             | chlorophenol red   | bromophenol red basic  | Zn(2,6-F <sub>2</sub> P)P   | CoTPP                 |
| malachite green                                       | thymol blue acid            | nile red           | chlorophenol red basic | methyl red basic            | ZnTPP                 |
| 2,6-dichloro-4-(2,4,6-triphenyl-1-pyridinio)phenolate | lead(II) acetate trihydrate | bromophenol blue   | brilliant yellow basic | malachite green             | cresol red            |
| copper(II) neodecanoate                               | bromophenol red acid        | thymol blue        | phenol red basic       | lead(II) acetate trihydrate | bromophenol blue acid |
| copper(II) naphthenate                                | nitrazine yellow acid       | bromocresol green  | cresol red basic       | ZnTPP                       | CoTPP                 |

Abbreviations: TMP = 5,10-15,20-tetramesitylporphyrinate(2-), TPP = 5,10,15,20-tetraphenylporphyrinate(2-), (2,6-F<sub>2</sub>P)P = 5,10,15,20-tetrakis(2,6-difluorophenyl)porphyrinate(2-).

**Table S2.** Summary of number of replicate experiments for each strain of bacteria.

| <b>Strain</b>            | <b>ATCC*</b> | <b>Replicates</b> |
|--------------------------|--------------|-------------------|
| Control                  | n/a          | 14                |
| <i>S aureus</i> (MRSA)   | 33591        | 24                |
| <i>P. aeruginosa</i>     | 10145        | 16                |
| <i>S aureus</i>          | 25923        | 15                |
| <i>S. epidermidis</i>    | 35984        | 16                |
| <i>S. sciuri</i>         | 49575        | 9                 |
| <i>E. faecalis</i> (VRE) | 51299        | 24                |
| <i>E. coli</i>           | 25922        | 6                 |
| <i>E. coli</i>           | 53502        | 9                 |
| <i>E. faecalis</i>       | 23241        | 16                |
| <i>E. faecium</i>        | 19434        | 15                |

\*American Type Culture Collection number.

**Table S3.** Complete digital data of all experiments.

The following pages present for each of 164 individual experiments (listed in Supplementary Information Table S2, above), the complete color change vectors as a function of time for each change in red, green and blue values of each of the 36 dye spots in the colorimetric sensor array.

164 trials on ten bacteria + control

1836 timestacked variables: RGB of 36 spots for 17 times (120 min. thru 600 min.)

| trial #:    | 1       | 2       | 3       | 4       | 5       | 6       | 7       | 8       | 9       | 10      | 11      | 12      | 13      | 14      | 15      | 16      | 17      | 18      | 19      | 20      | 21      | 22      | 23      | 24      |         |
|-------------|---------|---------|---------|---------|---------|---------|---------|---------|---------|---------|---------|---------|---------|---------|---------|---------|---------|---------|---------|---------|---------|---------|---------|---------|---------|
| Time Spot   | Control |
| Variable #  | 1       | 2       | 3       | 4       | 5       | 6       | 7       | 8       | 9       | 10      | 11      | 12      | 13      | 14      | MRSA 1  | MRSA 2  | MRSA 3  | MRSA 4  | MRSA 5  | MRSA 6  | MRSA 7  | MRSA 8  | MRSA 9  | MRSA 10 |         |
| 1 120 1 R   | -0.79   | 0.00    | 1.50    | 0.57    | 0.14    | 0.48    | -0.75   | -0.21   | 0.75    | 2.43    | -0.05   | -0.09   | 0.48    | 0.51    | 0.83    | 0.41    | -0.02   | -0.45   | 0.24    | -0.14   | 0.30    | -0.08   | -0.08   | 1.36    | 0.33    |
| 2 120 1 G   | 0.03    | 0.38    | 0.63    | 0.21    | 0.30    | 0.30    | -0.93   | 0.01    | 0.20    | 0.68    | -0.28   | 0.81    | -0.14   | 1.48    | -0.29   | 0.21    | -0.40   | 0.41    | 0.75    | -0.35   | -0.03   | 0.03    | -0.20   | 0.32    |         |
| 3 120 1 B   | -0.41   | 0.23    | 0.58    | 0.95    | 0.80    | 0.34    | 0.86    | -0.53   | 0.59    | 1.08    | -0.29   | 0.57    | 0.56    | -0.90   | -0.25   | 0.17    | 2.50    | -0.48   | -0.84   | 0.25    | 0.21    | 0.23    | 0.71    | 0.54    |         |
| 4 120 2 R   | -0.16   | -0.28   | 1.29    | 1.72    | 0.28    | -1.11   | 0.24    | -0.70   | 0.19    | -0.85   | 0.11    | 0.89    | -0.49   | -1.30   | 1.06    | -0.22   | -0.27   | 0.64    | 1.32    | 0.52    | 0.68    | 0.02    | -0.50   | 0.88    |         |
| 5 120 2 G   | -0.20   | -0.81   | 0.73    | 1.23    | -0.16   | -1.11   | -2.17   | 0.41    | -0.14   | 0.39    | -1.00   | -0.11   | -1.08   | -0.87   | 0.47    | -0.13   | 0.35    | -1.15   | -0.88   | -0.47   | -0.74   | -0.19   | 0.51    | 0.63    |         |
| 6 120 2 B   | -0.37   | 0.86    | 1.34    | 0.56    | 0.29    | 0.38    | 0.93    | 1.01    | 0.89    | -0.79   | -0.45   | -1.05   | -0.61   | 0.06    | -1.20   | 0.05    | 1.82    | 1.84    | 0.46    | 0.66    | 0.92    | 0.31    | 1.88    | 0.88    |         |
| 7 120 3 R   | -0.70   | -0.88   | 1.52    | 1.57    | -0.08   | -2.06   | 0.17    | -0.26   | -0.91   | 0.97    | -0.87   | 0.64    | -0.79   | -0.26   | -0.03   | 0.08    | 0.94    | -0.11   | 0.46    | -1.50   | -0.88   | 0.82    | 0.87    |         |         |
| 8 120 3 G   | -0.02   | 0.75    | 2.39    | 0.39    | 0.56    | 0.97    | 0.50    | 0.82    | 0.16    | 2.26    | -1.72   | 1.12    | -0.68   | 2.46    | 0.94    | 0.32    | 0.53    | 0.07    | -0.21   | 0.05    | 1.67    | 0.61    | 0.87    | -0.62   |         |
| 9 120 3 B   | 0.92    | 1.80    | 1.12    | 0.34    | 0.56    | 0.99    | 2.81    | 0.43    | 1.49    | 1.46    | -0.03   | 1.77    | 3.09    | 2.69    | 0.30    | 0.25    | -0.19   | 0.33    | 1.60    | 0.52    | -0.96   | 0.31    | -0.87   | 0.40    |         |
| 10 120 4 R  | 0.25    | -0.41   | 1.13    | -0.70   | -0.93   | -2.27   | -2.77   | -1.81   | -0.54   | 1.15    | 0.04    | -1.27   | -7.04   | 0.69    | 0.04    | 0.17    | 2.21    | 1.66    | 0.30    | 1.52    | 0.66    | -0.10   | -0.82   | -2.02   |         |
| 11 120 4 G  | -2.56   | -1.30   | -0.60   | -0.04   | -4.20   | -5.32   | -3.14   | -1.96   | -1.06   | -3.95   | -0.07   | -1.58   | -6.81   | -1.21   | -1.05   | 0.79    | 2.06    | 0.41    | 0.17    | -0.02   | 1.82    | 1.20    | -2.63   | -2.14   |         |
| 12 120 4 B  | -1.13   | 1.68    | -1.08   | -1.68   | -0.34   | -2.00   | 8.93    | -1.31   | 0.85    | -1.07   | 0.62    | -1.92   | -6.22   | 1.70    | -3.43   | -0.67   | -0.08   | 0.45    | 0.70    | -0.98   | 0.28    | -0.20   | 0.10    | -1.81   |         |
| 13 120 5 R  | 1.26    | -7.55   | 1.43    | 0.00    | -4.52   | -10.57  | -6.56   | -2.61   | -2.27   | -12.90  | -1.03   | -1.25   | -9.29   | -7.37   | 0.10    | 0.36    | 0.59    | -0.16   | 1.05    | -1.08   | 0.28    | 0.15    | -3.64   | 1.28    |         |
| 14 120 5 G  | -0.30   | -2.97   | 0.00    | 0.43    | -2.86   | -4.99   | -3.14   | -0.61   | -1.57   | -5.76   | -0.97   | -2.34   | -2.68   | -1.19   | 0.12    | 0.26    | 0.71    | -0.39   | -0.22   | 1.04    | 0.14    | -0.31   | -1.82   | -0.45   |         |
| 15 120 5 B  | 0.26    | -0.21   | 0.41    | -0.08   | -0.13   | 0.04    | -0.49   | -0.64   | 0.32    | -0.11   | -0.86   | 0.12    | 0.40    | 4.79    | 0.06    | -0.72   | 0.26    | -0.07   | -1.14   | -1.57   | -0.44   | -0.11   | 0.52    | -0.26   |         |
| 16 120 6 R  | 0.40    | 0.23    | 1.62    | 2.17    | 1.68    | 0.60    | 1.08    | 0.25    | 0.19    | 2.28    | -0.25   | 1.84    | 0.29    | 2.04    | 0.93    | 0.15    | 0.59    | 0.24    | 1.00    | 0.51    | 0.48    | 0.23    | 0.86    | 0.51    |         |
| 17 120 6 G  | -0.03   | -0.42   | 0.48    | -0.05   | -0.30   | -0.88   | -1.01   | -0.06   | 0.17    | 0.36    | -0.95   | -0.15   | -0.86   | -0.82   | -0.07   | 0.06    | 0.17    | -1.15   | -0.07   | -0.12   | -1.04   | -0.05   | -0.73   | -0.33   |         |
| 18 120 6 B  | 0.58    | 0.03    | 0.08    | 2.05    | 0.11    | 1.01    | 0.95    | 0.21    | 2.27    | 0.86    | -0.91   | -1.58   | 0.26    | 2.38    | 1.53    | 0.66    | 0.05    | 2.11    | 0.96    | 0.81    | 1.30    | 0.28    | 2.62    | 0.44    |         |
| 19 120 7 R  | -2.44   | -0.73   | -0.74   | 0.50    | 0.19    | -0.97   | -1.06   | -0.98   | -0.44   | -0.42   | -0.74   | 0.69    | -1.28   | -1.12   | -1.39   | 0.03    | -0.96   | -1.21   | -2.31   | -2.18   | -0.61   | -0.83   | -0.05   | -1.14   |         |
| 20 120 7 G  | -0.97   | -0.66   | 0.26    | 0.35    | -0.56   | -1.47   | -0.10   | -1.28   | -0.51   | 0.59    | -0.81   | -0.66   | -1.54   | -0.34   | -0.68   | -0.04   | -0.22   | -0.90   | -1.10   | -0.82   | -0.15   | -0.22   | -0.11   | -0.35   |         |
| 21 120 7 B  | 0.51    | -0.75   | 0.12    | -0.55   | 0.13    | -0.19   | -1.28   | 0.97    | 2.03    | 1.14    | -0.39   | 0.20    | 1.06    | -0.35   | -0.45   | 0.03    | 0.97    | -0.42   | -0.13   | -0.36   | 0.83    | 0.80    | -0.67   | -0.13   |         |
| 22 120 8 R  | 1.05    | 0.12    | 1.30    | 3.32    | 0.17    | 0.30    | 0.96    | 0.06    | 0.24    | 2.42    | 0.15    | 1.69    | 0.17    | 2.56    | 0.01    | 0.61    | 1.67    | 1.79    | 0.31    | 0.39    | 0.49    | 1.19    | 1.60    | 0.67    |         |
| 23 120 8 G  | 0.44    | 1.65    | 1.39    | 1.28    | 1.51    | 2.20    | 2.56    | 1.04    | 1.51    | 2.52    | -0.13   | 0.69    | 0.92    | 3.96    | 0.51    | -0.23   | 0.46    | 1.17    | 0.88    | 1.21    | 1.31    | 0.87    | 0.56    | 0.21    |         |
| 24 120 8 B  | 1.08    | 0.24    | 0.48    | 0.36    | 0.68    | -1.19   | 1.03    | -0.07   | 1.02    | 0.35    | -0.11   | -0.05   | 1.12    | 3.56    | 0.16    | -0.02   | 1.14    | -0.21   | 1.10    | -1.51   | -0.75   | -0.57   | 1.11    | 0.64    |         |
| 25 120 9 R  | 0.21    | -0.91   | 2.12    | 1.92    | 0.34    | -2.05   | -2.18   | -0.03   | 0.18    | 0.94    | -11.12  | 0.15    | -2.70   | -0.27   | 0.93    | 0.42    | 2.01    | 0.23    | 0.70    | 0.92    | -0.48   | -0.36   | -1.14   | -0.81   |         |
| 26 120 9 G  | 0.05    | -2.81   | -0.19   | 0.17    | -0.96   | -4.57   | -2.17   | -0.54   | -0.37   | -2.39   | -12.05  | -0.20   | -2.16   | -0.40   | 0.20    | 0.51    | 0.87    | 0.53    | -0.80   | 0.18    | 1.92    | 0.05    | -0.05   | 1.59    |         |
| 27 120 9 B  | 0.86    | -1.95   | -0.39   | 0.64    | -0.42   | -1.72   | -2.81   | 0.20    | -0.82   | -1.03   | -13.19  | 0.11    | -1.78   | 0.09    | 0.23    | -0.86   | -0.36   | -3.33   | -0.21   | 1.51    | 0.60    | 0.28    | 0.14    | 1.13    |         |
| 28 120 10 R | -0.01   | -2.16   | 0.69    | -0.11   | -0.23   | -0.94   | -2.16   | 0.39    | 0.63    | -0.51   | -0.70   | 0.44    | -1.92   | 1.06    | -0.20   | -0.72   | 0.40    | -1.03   | 0.87    | -1.94   | -0.09   | -1.18   | 0.66    | 0.46    |         |
| 29 120 10 G | 0.36    | -2.79   | 1.03    | 0.43    | 0.06    | -0.91   | -4.16   | 0.23    | 0.86    | -3.32   | -1.41   | -0.05   | -2.37   | 1.71    | 0.53    | 0.58    | 0.56    | -1.40   | 0.95    | -0.12   | -0.78   | 0.34    | -1.44   | 0.48    |         |
| 30 120 10 B | -0.60   | -1.10   | -0.19   | -0.55   | 0.51    | -0.34   | -2.52   | -0.27   | -0.84   | -3.68   | 0.87    | -0.55   | -2.27   | 0.26    | -1.94   | 1.27    | -0.14   | -2.12   | 1.59    | 0.57    | 0.12    | 0.14    | -0.38   | 0.99    |         |
| 31 120 11 R | -0.60   | -1.14   | 2.55    | 1.77    | 0.57    | -0.47   | 0.08    | 0.01    | 1.71    | 1.57    | 0.35    | 0.28    | -0.55   | -0.01   | -0.26   | 1.10    | 0.39    | -0.08   | 0.50    | 0.08    | 0.73    | -0.09   | -0.03   | -0.02   |         |
| 32 120 11 G | -0.37   | 0.17    | 1.27    | 0.34    | 0.30    | -0.49   | -0.78   | -0.56   | -0.90   | 0.66    | 0.38    | 0.50    | -0.50   | 1.34    | -0.35   | -0.98   | 0.47    | -0.46   | 0.04    | 0.18    | 0.01    | 0.13    | 0.14    | 0.63    |         |
| 33 120 11 B | 0.99    | 1.35    | 0.72    | 0.96    | 0.05    | 0.01    | 0.51    | -0.90   | 1.16    | 1.58    | 0.64    | 1.30    | -0.34   | -0.26   | 0.06    | 0.02    | -0.17   | 0.94    | 1.28    | 0.39    | 0.69    | -0.11   | 0.67    | 0.47    |         |
| 34 120 12 R | -3.61   | 0.77    | -2.99   | 0.89    | -0.22   | -0.40   | -0.92   | 0.68    | -3.42   | 0.26    | -0.37   | -0.81   | -0.59   | 0.07    | -3.22   | -2.49   | -1.74   | -3.20   | -1.26   | -3.02   | -2.03   | -2.28   | 0.61    | -0.42   |         |
| 35 120 12 G | -0.70   | 0.16    | 2.24    | 0.71    | -0.23   | 0.55    | -0.18   | 0.19    | 0.78    | 1.89    | -0.32   | 0.77    | 0.28    | 0.32    | 0.70    | -0.41   | 0.00    | 0.02    | 1.09    | 0.86    | 0.51    | 0.21    | 0.52    | 0.00    |         |
| 36 120 12 B | 1.12    | -0.49   | 3.26    | 1.65    | -1.16   | 0.72    | -0.11   | -0.74   | 0.51    | 1.77    | -0.09   | 1.46    | -0.36   | 0.68    | 2.83    | -0.93   | 0.29    | -0.06   | -0.13   | 0.43    | 0.88    | -0.46   | 0.70    | 1.44    |         |
| 37 120 13 R | -0.22   | 0.93    | 1.51    | 0.48    | 0.42    | 0.73    | 0.11    | 0.79    | 0.71    | 0.36    | 1.80    | 0.40    | 0.42    | 2.06    | 0.87    | 0.28    | -0.12   | 0.28    | 0.84    | 0.59    | 0.02    | -0.13   | 0.15    | 1.16    |         |
| 38 120 13 G | 0.55    | 0.96    | 2.17    | 1.38    | 1.31    | 0.19    | 1.35    | 0.18    | 0.40    | 2.70    | -0.65   | 0.12    | -0.50   | 1.97    | 0.14    | 0.84    | 0.99    | 0.28    | -0.09   | -0.56   | 0.10    | 1.50    | 1.31    | 0.64    |         |
| 39 120 13 B | -0.94   | 0.50    | 2.05    | 0.36    | 1.17    | 0.56    | 0.20    | 0.75    | 0.39    | 1.96    | 1.09    | -1.00   | 1.60    | 0.10    | 0.03    | -0.06   | 0.61    | 0.25    | 0.37    | 0.73    | 0.57    | -0.83   | -0.43   | 0.78    |         |
| 40 120 14 R | 0.86    | -1.62   | 0.49    | 0.67    | 0.24    | -1.30   | 0.87    | -0.26   | -0.23   | -0.46   | -1.11   | 0.62    | -1.86   | -1.12   | 0.72    | -1.76   | 0.68    | 1.00    | 1.61    | -0.76   | 0.31    | 1.41    | -0.15   | -0.68   |         |
| 41 120 14 G | -0.30   | 0.46    | 0.75    | 0.67    | -0.04   | -0.71   | -0.79   | -0.19   | 0.43    | 1.25    | -0.60   | 0.24    | -2.30   | -0.39   | -0.33   | 1.13    | 0.08    | -0.49   | -0.43   | 0.21    | -0.85   | -0.09   | 0.09    | 0.03    |         |
| 42 120 14 B | -0.01   | 0.17    | 1.82    | 1.40    | 0.94    | 0.92    | 1.83    | 1.91    | 2.79    | 1.65    | -0.10   | 0.26    | 1.98    | 1.91    | 0.81    | -0.19   | -0.32   | 0.32    | 1.91    | -0.07   | 0.73    | 0.74    | 1.29    | -0.28   |         |
| 43 120 15 R | 1.31    | 1.10    | 2.79    | 0.72    | 0.34    | -2.25   | -0.86   | 0.98    | 0.32    | 0.31    | -0.95   | 0.49    | -0.27   | 1.12    | -0.29   | 0.47    | 0.41    | 0.47    | 1.17    | 0.45    | -0.18   | 0.03    | 0.30    | 1.57    |         |
| 44 120 15 G | 0.84    | 0.95    | 1.18    | 0.48    | 0.58    | 1.41    | 0.33    | 0.50    | -0.14   | 3.19    | -0.44   |         |         |         |         |         |         |         |         |         |         |         |         |         |         |

|     |     |    |   |       |       |       |       |       |        |        |       |       |        |       |       |        |       |       |       |       |       |       |       |       |       |       |       |
|-----|-----|----|---|-------|-------|-------|-------|-------|--------|--------|-------|-------|--------|-------|-------|--------|-------|-------|-------|-------|-------|-------|-------|-------|-------|-------|-------|
| 106 | 120 | 36 | R | -2.96 | 1.09  | -2.29 | 1.15  | -1.30 | -1.01  | -0.34  | 0.76  | -1.79 | 0.73   | -0.37 | 1.12  | -0.99  | -1.61 | -2.37 | -2.37 | -0.83 | -2.24 | -2.49 | -1.46 | -1.66 | -1.25 | 0.51  | 0.26  |
| 107 | 120 | 36 | G | -0.54 | 0.50  | 0.17  | 0.27  | 1.04  | 0.27   | -0.63  | 0.08  | -0.12 | 1.19   | -0.90 | -0.10 | 0.28   | 0.39  | 0.52  | 0.08  | -0.43 | 0.08  | 0.60  | 1.26  | 1.19  | -0.26 | 1.28  | 0.21  |
| 108 | 120 | 36 | B | 2.45  | -0.35 | 1.83  | 0.35  | -1.45 | -0.56  | 0.89   | -0.52 | 0.24  | -1.08  | -0.23 | 0.07  | 1.02   | 0.72  | 0.45  | 1.37  | 1.38  | 0.94  | 2.19  | 1.08  | 0.15  | 0.08  | -0.72 | -0.58 |
| 109 | 150 | 1  | R | -1.21 | -0.47 | 3.52  | 0.53  | 0.34  | -0.72  | -0.01  | 0.21  | 1.59  | 1.81   | 0.54  | -1.04 | 1.83   | -0.48 | -0.51 | 0.38  | 0.23  | 0.60  | -0.37 | 0.48  | 0.24  | 1.42  | 0.72  | -0.18 |
| 110 | 150 | 1  | G | -0.01 | 0.78  | 1.41  | 0.59  | 0.43  | -0.58  | 0.25   | 0.21  | -0.24 | 1.12   | 0.56  | 0.44  | 1.58   | 2.00  | -0.56 | -0.24 | 0.04  | 0.18  | 0.64  | 0.40  | -0.10 | -0.47 | -0.12 | 0.62  |
| 111 | 150 | 1  | B | -0.48 | 0.70  | 0.75  | 1.04  | 0.49  | 0.95   | 1.68   | 0.45  | 1.68  | 0.07   | 0.56  | 0.67  | 0.85   | 0.55  | -0.50 | 0.79  | 2.68  | 0.45  | -0.48 | 0.36  | 0.01  | -0.31 | 0.75  | -0.36 |
| 112 | 150 | 2  | R | -1.02 | -0.47 | 2.26  | 1.60  | -0.70 | -3.01  | -1.20  | -0.10 | 0.26  | -2.75  | 1.03  | -0.54 | -2.19  | -1.24 | -0.64 | 0.33  | -0.17 | 0.06  | 0.09  | -0.10 | -0.19 | 0.94  | -0.50 | 1.01  |
| 113 | 150 | 2  | G | -0.93 | -0.94 | 2.36  | 1.23  | -1.12 | -1.57  | -2.06  | 1.16  | 0.06  | -1.19  | -0.08 | -0.44 | -0.90  | -1.09 | 0.37  | -0.17 | 1.02  | -0.14 | 0.44  | 0.21  | -0.13 | 0.27  | 0.52  | 0.20  |
| 114 | 150 | 2  | B | 1.47  | 0.21  | 1.52  | 1.00  | 0.92  | -1.21  | -1.50  | 0.49  | 2.92  | -1.92  | -0.20 | -1.21 | -1.39  | 1.25  | -0.30 | -0.42 | 0.13  | 0.33  | 0.21  | 1.12  | 0.00  | 0.84  | -0.77 | -0.01 |
| 115 | 150 | 3  | R | -2.44 | -0.95 | 3.66  | 0.82  | 0.14  | -3.10  | -0.19  | -0.26 | -0.19 | -0.77  | -0.55 | 0.31  | 0.23   | -0.02 | -1.19 | -0.19 | 0.15  | -0.53 | 1.19  | 1.09  | -1.07 | -0.77 | 0.56  | 1.06  |
| 116 | 150 | 3  | G | 0.91  | 1.27  | 3.22  | 1.10  | 0.66  | 0.75   | 2.23   | 1.42  | 0.89  | 1.44   | -0.70 | -0.06 | 1.03   | 3.26  | 0.97  | 0.61  | 1.12  | 0.92  | 0.39  | 0.29  | 1.30  | 1.23  | 1.11  | -0.45 |
| 117 | 150 | 3  | B | 0.78  | 1.62  | 2.62  | 0.68  | 0.93  | 1.85   | 4.23   | 1.25  | 1.93  | 3.17   | 1.99  | 1.13  | 4.07   | 5.29  | 0.93  | 0.62  | -0.43 | -1.55 | 0.69  | 0.20  | -0.01 | 0.71  | 1.01  | -0.40 |
| 118 | 150 | 4  | R | -1.16 | 0.47  | 1.79  | 0.35  | -2.20 | -2.93  | -5.12  | -2.22 | -0.83 | -1.21  | 1.26  | -3.32 | -5.49  | 1.07  | 1.86  | 2.04  | 3.88  | 2.98  | 2.70  | 2.60  | 1.60  | 2.25  | -0.29 | -0.96 |
| 119 | 150 | 4  | G | -1.67 | -1.64 | -1.70 | 0.27  | -6.35 | -5.88  | -8.15  | -3.08 | -3.58 | -8.32  | 0.59  | -4.05 | -7.52  | -3.61 | 5.86  | 2.07  | 7.23  | 2.15  | 1.20  | 1.94  | 3.62  | 1.94  | -2.55 | -1.43 |
| 120 | 150 | 4  | B | -2.27 | 2.45  | -3.78 | 1.70  | -1.08 | -1.76  | 5.48   | 1.00  | -1.08 | -0.89  | 1.26  | -1.37 | -4.43  | 0.98  | -0.77 | -0.50 | 1.63  | -0.95 | -0.17 | -2.01 | -2.21 | -1.52 | -2.52 | -3.35 |
| 121 | 150 | 5  | R | 1.44  | -9.61 | 3.17  | -1.44 | -6.83 | -19.78 | -13.84 | -1.64 | -3.47 | -20.27 | -1.26 | -4.38 | -13.79 | -9.61 | 0.54  | 1.11  | 2.58  | 1.37  | 2.52  | 0.53  | 1.97  | 1.21  | -4.89 | 1.54  |
| 122 | 150 | 5  | G | -0.71 | -3.27 | 1.19  | 0.22  | -4.91 | -9.41  | -6.34  | -0.68 | -1.94 | -10.42 | -0.87 | -4.26 | -4.24  | -0.38 | 0.36  | 0.08  | 1.31  | 0.30  | -0.48 | 1.10  | -1.17 | -0.06 | -2.74 | -0.95 |
| 123 | 150 | 5  | B | 0.46  | 0.38  | 0.58  | 0.23  | -0.17 | 0.23   | -0.15  | -0.28 | 0.99  | -0.32  | 0.14  | 0.46  | 0.51   | 8.79  | 0.44  | 0.28  | -1.00 | 0.03  | -1.69 | -1.27 | 0.10  | -0.37 | 0.26  | -0.36 |
| 124 | 150 | 6  | R | 0.21  | 1.03  | 3.39  | 2.22  | 1.79  | 0.79   | 0.64   | 2.66  | 0.58  | 2.85   | -0.57 | 0.88  | 1.55   | 2.06  | 1.26  | 1.22  | 1.42  | 0.66  | 2.13  | 1.64  | 0.32  | 0.50  | 2.47  | 1.43  |
| 125 | 150 | 6  | G | -0.63 | -0.81 | 1.10  | 0.31  | -0.87 | -2.30  | -1.41  | 0.33  | -0.37 | -0.08  | 0.39  | -0.93 | -0.03  | -0.86 | -0.06 | -0.47 | 0.45  | -0.62 | -0.55 | 0.30  | -0.73 | -0.24 | -1.24 | -0.40 |
| 126 | 150 | 6  | B | 1.14  | 0.61  | 0.63  | 1.28  | 1.71  | 1.73   | 1.37   | 2.98  | 2.65  | 1.74   | 0.81  | 0.19  | 1.25   | 3.89  | 0.97  | 0.99  | 0.09  | 2.15  | 2.10  | 1.16  | 1.37  | 0.22  | 2.57  | 0.11  |
| 127 | 150 | 7  | R | -3.55 | -0.94 | -0.89 | -0.48 | -0.69 | -3.79  | -1.35  | -0.87 | -1.96 | -1.89  | 1.25  | -1.53 | -1.15  | -1.52 | -1.88 | -0.78 | -0.72 | -1.57 | -1.97 | -2.79 | -1.91 | -2.41 | -1.21 | -0.71 |
| 128 | 150 | 7  | G | -1.70 | -1.13 | -0.02 | 0.07  | -1.19 | -1.43  | -1.31  | -0.34 | -0.46 | 0.19   | 0.68  | -1.63 | -1.30  | -0.46 | -1.01 | -0.90 | -0.76 | -1.57 | -1.17 | -0.92 | -1.01 | -0.08 | -1.30 | -0.77 |
| 129 | 150 | 7  | B | -0.42 | -0.90 | 0.57  | 0.19  | -0.84 | -0.56  | -0.66  | -0.18 | 2.18  | 1.78   | -0.05 | -0.65 | -1.17  | -1.34 | -1.02 | -0.69 | 0.44  | -0.48 | 0.79  | -0.83 | 0.75  | -0.96 | -1.54 | 0.83  |
| 130 | 150 | 8  | R | -1.03 | 1.72  | 3.87  | 3.20  | 1.26  | 1.47   | 3.49   | 2.25  | 1.63  | 2.89   | 1.06  | 1.02  | 1.94   | 4.25  | 0.42  | 0.81  | 1.59  | 2.70  | 1.19  | 1.66  | 1.10  | 1.68  | 1.86  | 1.97  |
| 131 | 150 | 8  | G | 0.92  | 2.01  | 1.85  | 0.99  | 1.98  | 3.24   | 2.70   | 0.75  | 1.70  | 3.11   | 1.10  | 1.28  | 2.89   | 6.48  | 0.77  | 0.48  | 1.79  | 1.13  | 1.33  | 1.34  | 1.66  | 0.71  | 1.32  | 0.22  |
| 132 | 150 | 8  | B | 1.21  | 0.95  | 0.89  | 0.23  | 2.42  | 1.29   | 0.33   | 0.77  | 0.26  | -0.79  | 0.83  | 1.66  | 0.97   | 6.31  | 0.82  | 0.63  | 1.35  | 0.15  | 1.27  | 0.15  | 0.06  | 0.66  | 1.46  | 0.83  |
| 133 | 150 | 9  | R | -0.24 | -1.45 | 3.06  | 1.82  | -2.28 | -5.21  | -2.62  | -0.50 | -0.12 | 0.27   | -0.37 | -0.43 | -2.23  | -1.55 | 1.28  | 1.08  | 2.14  | 0.33  | 0.25  | 2.04  | 0.88  | 0.93  | 0.53  | -0.67 |
| 134 | 150 | 9  | G | 1.38  | -3.30 | 1.66  | -0.30 | -0.97 | -8.98  | -4.94  | 0.69  | -0.55 | -3.56  | -0.63 | -1.23 | -3.90  | -2.90 | 1.20  | 1.80  | 1.94  | 1.38  | -0.50 | 1.92  | 2.71  | 1.10  | 0.25  | 2.08  |
| 135 | 150 | 9  | B | -0.29 | -2.02 | 1.13  | 0.66  | -0.58 | -3.72  | -4.56  | 0.81  | -0.94 | -1.64  | -1.39 | 1.17  | -3.99  | -0.14 | 0.18  | 0.07  | 1.20  | -2.12 | -0.68 | -0.02 | 0.95  | 1.56  | 2.00  | 1.08  |
| 136 | 150 | 10 | R | -1.94 | -2.41 | 1.20  | -0.14 | -0.40 | -2.91  | -3.33  | 0.30  | 1.11  | -6.32  | 0.82  | 0.77  | -3.11  | 1.79  | -0.38 | -0.38 | 0.19  | -1.42 | 0.07  | 0.10  | 0.36  | -1.25 | -0.29 | -0.78 |
| 137 | 150 | 10 | G | -1.61 | -3.88 | 2.36  | -0.21 | -0.27 | -2.57  | -5.02  | 1.10  | 0.92  | -5.24  | 0.29  | -0.12 | -4.71  | 1.97  | 0.67  | 0.89  | 0.90  | -1.68 | -1.14 | -0.56 | -0.51 | 0.73  | -2.60 | 1.02  |
| 138 | 150 | 10 | B | -0.64 | -2.52 | 0.71  | -0.20 | -0.90 | -3.44  | -2.14  | 0.41  | -1.85 | -4.95  | 1.34  | -1.47 | -2.67  | 0.04  | -1.74 | -0.83 | -0.89 | -2.25 | -0.19 | -0.90 | -0.24 | -1.04 | -1.26 | -0.55 |
| 139 | 150 | 11 | R | -3.03 | 0.04  | 4.10  | 1.73  | 1.73  | -1.57  | 0.25   | 0.30  | 1.44  | 1.93   | 1.41  | -1.17 | 1.67   | -0.05 | 0.90  | 0.38  | 0.62  | -0.29 | 0.04  | 0.32  | 0.41  | 0.19  | 0.75  | 0.24  |
| 140 | 150 | 11 | G | -0.71 | -0.77 | 1.11  | 0.59  | -0.55 | -1.05  | -0.87  | 0.38  | -0.41 | 0.62   | 1.80  | -0.80 | -0.18  | 0.83  | -1.08 | -0.59 | 0.50  | -0.32 | 0.19  | -0.22 | -0.44 | 0.00  | -0.74 | 0.54  |
| 141 | 150 | 11 | B | 1.58  | 1.14  | 1.20  | 1.36  | -1.81 | 1.48   | 0.35   | -1.46 | 0.71  | 1.59   | 0.10  | 0.52  | 0.33   | -0.06 | -0.77 | -0.42 | 0.66  | 0.39  | 1.62  | 0.28  | -0.24 | 0.54  | 0.54  | -0.26 |
| 142 | 150 | 12 | R | -7.28 | 0.74  | -3.95 | 0.95  | -0.35 | -1.23  | -0.43  | 1.37  | -4.96 | 0.67   | 0.47  | -1.42 | -0.40  | 0.43  | -7.11 | -5.12 | -3.79 | -5.63 | -1.65 | -5.41 | -3.70 | -4.82 | 0.51  | -0.55 |
| 143 | 150 | 12 | G | -0.14 | -0.33 | 2.13  | 0.79  | -0.12 | -0.13  | 0.19   | 0.94  | 0.50  | 2.18   | 0.51  | -0.53 | 1.06   | -0.13 | 1.22  | 0.44  | -0.09 | 0.93  | 0.66  | 0.57  | 0.22  | 0.00  | 1.12  | 0.89  |
| 144 | 150 | 12 | B | 2.60  | 0.50  | 8.31  | 2.71  | 0.03  | 1.74   | 0.03   | 1.18  | 1.57  | 2.12   | 1.24  | 1.93  | 2.03   | 2.81  | 4.62  | -0.57 | -0.56 | 0.61  | 0.68  | 0.35  | 0.59  | -1.00 | 1.04  | 2.06  |
| 145 | 150 | 13 | R | -0.54 | 0.72  | 1.90  | 1.56  | 0.23  | 0.38   | 0.89   | 0.84  | 0.37  | 1.20   | 2.10  | 0.72  | 0.47   | 4.48  | 1.59  | 1.27  | 1.58  | -0.14 | 1.31  | 1.40  | 0.40  | 0.08  | 1.08  | 1.11  |
| 146 | 150 | 13 | G | -0.32 | 1.39  | 2.18  | 1.62  | 1.85  | 0.50   | 0.71   | 1.14  | 1.31  | 2.48   | 0.38  | 0.45  | 1.37   | 2.60  | 0.22  | 1.18  | 1.71  | 0.09  | 0.54  | 0.31  | 0.28  | 1.59  | 1.70  | 1.21  |
| 147 | 150 | 13 | B | 0.40  | 0.48  | 2.77  | 1.67  | 1.24  | 0.38   | 1.17   | -0.12 | 0.89  | 1.32   | 1.61  | -1.99 | 2.16   | 0.67  | 0.49  | -0.55 | -0.10 | 0.05  | 0.82  | 1.17  | 0.47  | -0.43 | -0.43 | 0.32  |
| 148 | 150 | 14 | R | -1.10 | -1.22 | 1.19  | 1.38  | -1.27 | -2.96  | -1.01  | 0.04  | -0.73 | -1.52  | 1.02  | 0.15  | 0.46   | -1.50 | -0.07 | -0.18 | 0.65  | 0.30  | 0.34  | -0.43 | -0.36 | 0.72  | -0.25 | 0.29  |
| 149 | 150 | 14 | G | -1.52 | -0.20 | 1.76  | 0.83  | 0.34  | -1.20  | -0.01  | 0.26  | -0.37 | -0.01  | 0.06  | 0.00  | -2.35  | 0.12  | -0.69 | 0.26  | 0.41  | -0.06 | 0.87  | 0.66  | -0.68 | 0.51  | 0.83  | 0.18  |
| 150 | 150 | 14 | B | -0.28 | 1.37  | 1.98  | 1.78  | 0.32  | 0.80   | 2.29   | 2.19  | 2.74  | 2.34   | 0.35  | 0.93  | 1.77   | 3.84  | 1.41  | -0.07 | 0.45  | -0.39 | 1.37  | -0.66 | -0.26 | -1.12 | 1.20  | 0.27  |
| 151 | 150 | 15 | R | 0.57  | 1.36  | 4.75  | 1.35  | 0.48  | -2.59  | 0.73   | 1.06  | 0.80  | 0.48   | -0.34 | 0.85  | 1.98   | 2.00  | 0.26  | 0.89  | 0.95  | -0.85 | 0.30  | 2.14  | -0.64 | 0.27  | 0.63  | 1.48  |
| 152 | 150 | 15 | G | -0.22 | 0.82  | 0.76  | 0.76  | 0.48  | 0.92   | 1.43   | 0.65  | 0.46  | 2.74   | -0.17 | -0.17 | 1.39   | 2.80  | 0.02  | -0.39 | 0.67  | 0.84  | 1.50  | -0.32 | 1.57  | 0.66  | 1.26  | -0.17 |
| 153 | 150 | 15 | B | -0.15 | 1.11  | 2.12  | 1.86  | -0.61 | -1.84  | -0.14  | -0.49 | 0.70  | 1.34   | -0.07 | 0.93  | 0.50   | -0.36 | -0.24 | -0.34 | 0.93  | -0.54 | 0.22  | 1.13  | 0.73  | 0.35  | 0.48  | 0.11  |
| 154 | 150 | 16 | R | 0.36  | -1.79 | 0.94  | 1.25  | -0.60 | 0.41   | -2.12  | -0.38 | 0.10  | -5.99  | 1.58  | -0.69 | -3.73  | -0.90 | 0.43  | -0.09 | -0.59 | -0.93 | -0.57 | 0.74  | -0.79 | -0.31 | 0.43  | 1.31  |
| 155 | 150 | 16 | G | -0.13 | -0.28 | 0.61  | -0.34 | -0.23 | 0.51   | -2.15  | 0.55  | 0.11  | -4.41  | 0.33  | -0.69 | -5.80  | 0.35  | 0.76  |       |       |       |       |       |       |       |       |       |

|     |     |    |   |       |        |       |       |       |        |        |       |       |        |       |       |        |       |       |       |       |       |       |       |       |       |       |       |
|-----|-----|----|---|-------|--------|-------|-------|-------|--------|--------|-------|-------|--------|-------|-------|--------|-------|-------|-------|-------|-------|-------|-------|-------|-------|-------|-------|
| 217 | 180 | 1  | R | -0.82 | 0.12   | 2.94  | 0.56  | 0.72  | -0.10  | 1.07   | 0.83  | 2.11  | 1.79   | -0.51 | -1.19 | 1.63   | -0.10 | 1.34  | -0.19 | 1.47  | -0.09 | -0.85 | 0.44  | 1.10  | -0.46 | 0.68  | -0.02 |
| 218 | 180 | 1  | G | 0.30  | 0.88   | 0.52  | 0.32  | 0.61  | 0.31   | 0.89   | 0.23  | 0.13  | 0.83   | 0.06  | 0.20  | 1.00   | 2.74  | -0.91 | -0.03 | -0.56 | 0.25  | 0.48  | -0.11 | 1.10  | -0.11 | -0.27 | 0.43  |
| 219 | 180 | 1  | B | -0.14 | -0.30  | 0.79  | 0.21  | 0.30  | -0.06  | 0.54   | 0.08  | 0.77  | 2.34   | -0.09 | 0.27  | 2.12   | 0.86  | 0.24  | 0.06  | 2.85  | 0.67  | -0.72 | -1.11 | -0.06 | -0.08 | 1.19  | 0.07  |
| 220 | 180 | 2  | R | 0.04  | -0.04  | 0.81  | 0.91  | 1.00  | -0.92  | -0.54  | -1.33 | 0.79  | -2.62  | -0.02 | -1.05 | -3.34  | -0.84 | 0.02  | -0.02 | -0.33 | 0.39  | 0.12  | 0.68  | -0.34 | -0.04 | -0.62 | -0.20 |
| 221 | 180 | 2  | G | -1.04 | -1.48  | 2.01  | 0.07  | -0.76 | -1.32  | -1.59  | 0.78  | 1.00  | -2.18  | -0.42 | -1.10 | -1.89  | -1.46 | 0.76  | -0.16 | 0.85  | -0.61 | 0.11  | -0.56 | 0.27  | 0.60  | 0.04  | 0.70  |
| 222 | 180 | 2  | B | 1.47  | -0.31  | 1.29  | 2.05  | 0.72  | -1.38  | -1.82  | 0.70  | 1.63  | -3.84  | 0.10  | -1.07 | -2.90  | 0.90  | 0.90  | -0.28 | 3.23  | 1.21  | 1.58  | 0.44  | 1.59  | 2.62  | 1.62  | -0.36 |
| 223 | 180 | 3  | R | -1.60 | -0.37  | 3.52  | 1.59  | 0.08  | -1.58  | 0.33   | -0.35 | 0.14  | -1.21  | -1.55 | -0.82 | -0.69  | 1.21  | -1.04 | -0.46 | 0.56  | 0.71  | 0.87  | 0.38  | -0.93 | -0.21 | 1.09  | 0.22  |
| 224 | 180 | 3  | G | 1.17  | 1.27   | 2.12  | 1.00  | 0.62  | 2.83   | 3.41   | 1.25  | 1.54  | 2.24   | -1.27 | 0.92  | 1.72   | 5.74  | 1.57  | 0.52  | 1.08  | 1.04  | 0.47  | 0.95  | 0.83  | 1.14  | 1.39  | 0.09  |
| 225 | 180 | 3  | B | -0.34 | 2.88   | 1.57  | 1.36  | 2.03  | 2.87   | 4.96   | 1.19  | 2.29  | 3.17   | 1.49  | 1.59  | 3.93   | 6.53  | 0.80  | 1.85  | -0.58 | -0.61 | 1.74  | 0.82  | -0.28 | 1.30  | 0.90  | 0.08  |
| 226 | 180 | 4  | R | 0.68  | 0.86   | 1.14  | 0.72  | -2.98 | -2.92  | -5.97  | -3.09 | -2.06 | -2.76  | 1.29  | -4.06 | -5.74  | 0.70  | 1.97  | 3.12  | 5.05  | 4.50  | 2.08  | 4.38  | 3.13  | 2.79  | 1.72  | 0.89  |
| 227 | 180 | 4  | G | -1.11 | -2.16  | -2.67 | 0.30  | -8.84 | -10.70 | -13.04 | -3.35 | -3.44 | -8.72  | -0.20 | -4.55 | -8.47  | -1.72 | 3.86  | 4.44  | 8.09  | 6.39  | 2.65  | 3.87  | 6.06  | 4.71  | -0.75 | 1.42  |
| 228 | 180 | 4  | B | -2.01 | 2.30   | -3.27 | 0.92  | -1.00 | -3.16  | 3.94   | 0.46  | -0.14 | -0.67  | 1.77  | -0.51 | -3.89  | 4.16  | -4.52 | -0.67 | -1.64 | -1.41 | -1.83 | -1.88 | -2.37 | -2.88 | -2.17 | -3.19 |
| 229 | 180 | 5  | R | 2.76  | -10.20 | 2.61  | -2.42 | -7.80 | -21.90 | -19.36 | -0.23 | -2.21 | -27.02 | -2.39 | -5.40 | -15.90 | -9.21 | 1.19  | 1.05  | 2.23  | 2.57  | 3.83  | 1.15  | 2.29  | 1.74  | -4.54 | 1.52  |
| 230 | 180 | 5  | G | 0.17  | -2.22  | 0.42  | -0.69 | -5.77 | -11.84 | -9.10  | -0.34 | -2.23 | -13.27 | -1.91 | -4.21 | -4.59  | 0.29  | 0.72  | 0.25  | 1.28  | 0.77  | 0.00  | 0.86  | 0.04  | -0.23 | -2.72 | -0.99 |
| 231 | 180 | 5  | B | -0.24 | 0.42   | 0.99  | 0.55  | -0.24 | 0.68   | 0.76   | -0.15 | 0.45  | -0.40  | 1.43  | 0.80  | 0.18   | 10.45 | -0.17 | -1.33 | -0.69 | 0.43  | -1.23 | -0.75 | -0.61 | 0.31  | 0.12  | -0.39 |
| 232 | 180 | 6  | R | 0.59  | 1.37   | 2.01  | 3.15  | 2.43  | 1.64   | 1.68   | 1.60  | 2.21  | 3.25   | -0.72 | 0.49  | 1.68   | 3.03  | 2.12  | 0.65  | 1.41  | 1.60  | 2.38  | 1.83  | 0.80  | 0.69  | 2.22  | 0.84  |
| 233 | 180 | 6  | G | -1.33 | -0.61  | 0.63  | 0.02  | -0.81 | -1.70  | -0.38  | 1.23  | -0.65 | 0.37   | -0.29 | -1.14 | -0.06  | -0.70 | -0.81 | -0.46 | 0.05  | -0.63 | 0.53  | 0.21  | -1.06 | -0.13 | -0.93 | -0.40 |
| 234 | 180 | 6  | B | 3.37  | 2.57   | 1.16  | 1.40  | 0.94  | 2.79   | 0.33   | 2.74  | 3.64  | 2.87   | 0.43  | -1.01 | 1.45   | 5.50  | 0.89  | 1.87  | 1.57  | 1.72  | 1.50  | 2.04  | 2.99  | 1.76  | 2.48  | 1.57  |
| 235 | 180 | 7  | R | -4.08 | -1.22  | -2.20 | -0.56 | -1.17 | -2.94  | -1.88  | -2.20 | -1.84 | -3.06  | 0.20  | -1.44 | -1.44  | -2.28 | -2.95 | -1.45 | -1.60 | -2.26 | -2.79 | -3.56 | -2.48 | -3.37 | -1.94 | -0.78 |
| 236 | 180 | 7  | G | -1.96 | -1.25  | -1.43 | -0.94 | -1.59 | -1.88  | -1.32  | -1.23 | -0.95 | -0.62  | -0.44 | -1.57 | -1.43  | 0.71  | -2.70 | -1.59 | -1.04 | -2.17 | -1.32 | -2.23 | -0.71 | -0.81 | -1.18 | -1.19 |
| 237 | 180 | 7  | B | -0.47 | -0.77  | -0.55 | 0.61  | -1.32 | -0.09  | -0.93  | 0.48  | 1.78  | 1.86   | 0.23  | -0.40 | 0.83   | -1.30 | -0.54 | -1.49 | 0.56  | -0.03 | -1.02 | -1.28 | 0.55  | -1.77 | -1.75 | 1.48  |
| 238 | 180 | 8  | R | 1.06  | 1.57   | 3.13  | 4.16  | 1.78  | 2.79   | 4.21   | 1.12  | 1.84  | 3.12   | 0.51  | 1.62  | 2.08   | 4.05  | 1.54  | 0.72  | 1.63  | 3.76  | 2.04  | 1.09  | 1.29  | 2.21  | 2.59  | 2.63  |
| 239 | 180 | 8  | G | 1.85  | 3.47   | 2.67  | 1.25  | 1.43  | 2.77   | 5.20   | 1.26  | 3.10  | 4.58   | 0.09  | -0.23 | 4.13   | 8.88  | 1.08  | 0.85  | 2.15  | 0.87  | 1.48  | 1.75  | 2.08  | 1.59  | 1.51  | 0.97  |
| 240 | 180 | 8  | B | 0.69  | 0.43   | 0.20  | 0.63  | -0.81 | -0.98  | -0.38  | 0.68  | 1.31  | -1.08  | 1.23  | 1.78  | 0.53   | 6.88  | 0.59  | 1.10  | 1.51  | -0.97 | 1.32  | -0.77 | 3.08  | 0.80  | 1.33  | 1.74  |
| 241 | 180 | 9  | R | 1.30  | -1.41  | 2.71  | 1.48  | -1.30 | -5.15  | -3.39  | 0.19  | 0.42  | -0.86  | -3.69 | -0.23 | -2.90  | -1.90 | 1.86  | 2.01  | 2.53  | 1.37  | 0.97  | 2.66  | 2.21  | 1.92  | 0.49  | 0.85  |
| 242 | 180 | 9  | G | 2.06  | -4.08  | 2.45  | -0.24 | -1.79 | -10.11 | -7.66  | 1.29  | 1.49  | -4.74  | -4.46 | -0.92 | -5.96  | -2.39 | 2.73  | 2.79  | 3.59  | 1.59  | 1.29  | 3.82  | 4.09  | 2.71  | 5.2   | 1.22  |
| 243 | 180 | 9  | B | 0.57  | -3.28  | -0.25 | 1.24  | -0.87 | -5.17  | -6.14  | 1.40  | 0.18  | -3.42  | -4.90 | 0.89  | -4.41  | -0.63 | -0.59 | -1.24 | 1.94  | -3.35 | -1.63 | 0.29  | -0.92 | -0.81 | 0.03  | -0.09 |
| 244 | 180 | 10 | R | -1.17 | -3.25  | 0.78  | -0.13 | -0.40 | -3.02  | -4.16  | -0.17 | 1.79  | -7.26  | -1.40 | -0.07 | -4.89  | 1.10  | -0.40 | -0.51 | 1.06  | -1.73 | 0.67  | -1.17 | 0.33  | 0.63  | -0.71 | -0.16 |
| 245 | 180 | 10 | G | -0.60 | -4.43  | 1.81  | -0.86 | -0.62 | -3.76  | -6.18  | 0.38  | 2.25  | -5.99  | -0.65 | -0.44 | -7.08  | 1.81  | 0.27  | 1.24  | 1.60  | -1.77 | -1.12 | 0.01  | -0.10 | 2.86  | -2.85 | 0.86  |
| 246 | 180 | 10 | B | -0.57 | -2.50  | -0.95 | -0.56 | -0.09 | -4.41  | -2.99  | 1.26  | -1.53 | -6.77  | 1.48  | -0.14 | -3.86  | -1.17 | -3.14 | -0.83 | -0.12 | -3.32 | -1.05 | -0.10 | -1.53 | 0.62  | -2.30 | -0.95 |
| 247 | 180 | 11 | R | -1.47 | 0.54   | 1.04  | 1.47  | 1.64  | 0.22   | 1.08   | -0.55 | 1.01  | 1.72   | 1.12  | -1.62 | 0.98   | -1.54 | 0.42  | -0.11 | 0.84  | -0.74 | 0.55  | 0.44  | 0.75  | 0.12  | 0.01  | 0.65  |
| 248 | 180 | 11 | G | -0.98 | -0.62  | 1.09  | 0.43  | -0.63 | -0.10  | -0.32  | 1.13  | -0.34 | 0.81   | 1.89  | -1.06 | 0.03   | 1.24  | -1.15 | -1.08 | -0.14 | -0.29 | -0.11 | -0.37 | -0.09 | 0.20  | -0.67 | 0.69  |
| 249 | 180 | 11 | B | 1.47  | 2.37   | 2.37  | 1.20  | -2.12 | 2.24   | 0.97   | -1.36 | 0.61  | 1.78   | -0.48 | 0.32  | 0.32   | -0.27 | -1.03 | 0.51  | 0.06  | -0.06 | 1.95  | 0.45  | 0.20  | 1.05  | 0.28  | 0.02  |
| 250 | 180 | 12 | R | -8.52 | 0.05   | -6.37 | 1.42  | 1.73  | -0.48  | 0.29   | 0.84  | -6.02 | 0.96   | -0.77 | -1.88 | -0.90  | 0.45  | -7.55 | -6.99 | -5.26 | -7.06 | -6.21 | -8.51 | -5.05 | -6.84 | 1.32  | -0.71 |
| 251 | 180 | 12 | G | 0.70  | 0.99   | 1.94  | 0.49  | -0.58 | 1.58   | 1.30   | 0.69  | 0.36  | 2.32   | 0.25  | 0.15  | 1.12   | -0.20 | 0.43  | 0.63  | 0.35  | 0.90  | 1.54  | 1.24  | 0.45  | 1.04  | 0.45  | 1.21  |
| 252 | 180 | 12 | B | 5.01  | 1.03   | 8.62  | 2.71  | 0.23  | 1.90   | 0.34   | 1.31  | 3.97  | 2.13   | 1.13  | 1.39  | 0.61   | 2.81  | 8.60  | -1.29 | 0.41  | 1.42  | 0.60  | 2.20  | 0.93  | -0.33 | 2.38  | 1.54  |
| 253 | 180 | 13 | R | -0.01 | 1.38   | 2.88  | 2.33  | 1.08  | 3.64   | 1.13   | 0.85  | 2.04  | 1.76   | 1.31  | 0.34  | 0.55   | 5.87  | 0.96  | 0.61  | 1.79  | 0.83  | 0.67  | 0.32  | 0.39  | 1.16  | 2.01  | 0.28  |
| 254 | 180 | 13 | G | 1.15  | 1.34   | 2.31  | 0.57  | 1.92  | 1.07   | 1.42   | 0.73  | 0.85  | 2.69   | -1.11 | 0.92  | 1.97   | 3.42  | 0.41  | 1.64  | 1.68  | 1.10  | 1.23  | 1.34  | 0.90  | 1.63  | 1.38  | 1.43  |
| 255 | 180 | 13 | B | -0.44 | 0.35   | 2.71  | 1.60  | 1.48  | 2.54   | 1.01   | 1.00  | 1.49  | 1.70   | 1.07  | -1.87 | 2.65   | 1.16  | 0.44  | 1.10  | 0.82  | 0.86  | 0.77  | 1.50  | 1.31  | 0.47  | -0.13 | 0.42  |
| 256 | 180 | 14 | R | -0.25 | -1.46  | 0.08  | 0.29  | -0.65 | -0.37  | -1.01  | -0.01 | -0.24 | -2.71  | -1.08 | -0.80 | -0.42  | -1.90 | 0.24  | -0.66 | 0.30  | 0.16  | -0.29 | -0.48 | -0.12 | 0.83  | -0.24 | -0.82 |
| 257 | 180 | 14 | G | -0.66 | -0.04  | 0.79  | 0.19  | 0.34  | 0.20   | 0.27   | 0.17  | 1.88  | 0.37   | -0.37 | -0.52 | 0.17   | -0.41 | -0.22 | 0.66  | 0.12  | -0.23 | 0.54  | 0.22  | -0.06 | 0.78  | -0.16 | 1.15  |
| 258 | 180 | 14 | B | -0.12 | 1.17   | 1.02  | 1.63  | 1.02  | 2.06   | 3.18   | 1.69  | 3.46  | 4.43   | 0.08  | 1.06  | 3.24   | 5.17  | 1.85  | -0.51 | 1.33  | 0.85  | 1.92  | -0.38 | 0.09  | 0.05  | 1.41  | 0.90  |
| 259 | 180 | 15 | R | 0.97  | 1.53   | 3.92  | 2.27  | 1.08  | 1.42   | 2.37   | 0.68  | 1.40  | 0.50   | -0.86 | 0.23  | 2.62   | 2.19  | 0.30  | 0.84  | 2.50  | 0.13  | 1.60  | 2.77  | 0.05  | -0.25 | 0.58  | 0.92  |
| 260 | 180 | 15 | G | 0.79  | 0.95   | 0.91  | -0.02 | 0.56  | 1.43   | 2.63   | 0.26  | 1.29  | 3.10   | -1.31 | 0.50  | 2.63   | 3.17  | 0.28  | 0.17  | 0.03  | 0.95  | 0.46  | 0.12  | 1.24  | 0.45  | 1.11  | 0.26  |
| 261 | 180 | 15 | B | -0.21 | 0.41   | 0.89  | 1.79  | -0.51 | -2.17  | 0.63   | 0.46  | -0.33 | 0.20   | 1.10  | 0.33  | -0.21  | 0.12  | -1.31 | -0.53 | 0.86  | -1.56 | 0.21  | -0.50 | 0.02  | 0.16  | -0.25 | -1.17 |
| 262 | 180 | 16 | R | -1.30 | -2.27  | 0.52  | 0.88  | -0.76 | -0.33  | -1.80  | 0.12  | -1.74 | -6.35  | 0.44  | 0.95  | -4.81  | -1.66 | 0.66  | -0.26 | -1.24 | -0.01 | -0.12 | 0.05  | -0.23 | -0.10 | -0.33 | 1.69  |
| 263 | 180 | 16 | G | 0.71  | -0.88  | 0.33  | -0.44 | 0.07  | 2.02   | -1.86  | 0.28  | 0.60  | -5.88  | -0.23 | -0.13 | -7.16  | 0.54  | 1.80  | 1.14  | 0.24  | 0.18  | 0.43  | 0.83  | 2.00  | 0.42  | -2.06 | 1.68  |
| 264 | 180 | 16 | B | -1.62 | -1.75  | -2.57 | -1.25 | 0.52  | -1.03  | -3.57  | -0.44 | -2.25 | -7.17  | -0.81 | -0.51 | -5.20  | -2.07 | -3.10 | -1.07 | -1.99 | -0.15 | -3.26 | -2.91 | -1.00 | -1.78 | -2.83 | -4.48 |
| 265 | 180 | 17 | R | 0.74  | 1.27   | 1.93  | 2.43  | 0.33  | 1.25   | 2.81   | 1.57  | 3.60  | 2.92   | -1.64 | 1.05  | 2.49   | 2.00  | -0.73 | -0.20 | 0.45  | 1.15  | 0.31  | 0.18  | 0.57  | 1.44  | 0.54  | 0.49  |
| 266 | 180 | 17 | G | 0.48  | 4.35   | 2.00  | 2.95  | 3.71  | 4.20   | 5.66   | 4.27  | 2.43  | 5.30   | 0.71  | 3.57  | 3.96   | 6.90  | -0.30 |       |       |       |       |       |       |       |       |       |

|     |     |    |   |       |        |       |       |        |        |        |       |       |        |        |       |        |        |       |       |       |       |       |        |        |       |       |       |
|-----|-----|----|---|-------|--------|-------|-------|--------|--------|--------|-------|-------|--------|--------|-------|--------|--------|-------|-------|-------|-------|-------|--------|--------|-------|-------|-------|
| 328 | 210 | 2  | R | 0.79  | -0.32  | 1.72  | 0.66  | 0.74   | -1.47  | -2.09  | -0.87 | -0.13 | -4.78  | 1.27   | 0.30  | -4.18  | -0.62  | -0.25 | -0.35 | -0.64 | -0.13 | 0.68  | -0.25  | -0.85  | 0.15  | -0.05 | -0.04 |
| 329 | 210 | 2  | G | -0.19 | -1.96  | 2.10  | 1.37  | -0.73  | -0.99  | -2.58  | 0.69  | 1.00  | -3.27  | 0.66   | 0.32  | -1.76  | -0.60  | 0.47  | 0.24  | 0.83  | 0.46  | 0.16  | 0.19   | 0.15   | 1.05  | -0.48 | 0.98  |
| 330 | 210 | 2  | B | 0.07  | -1.29  | 2.06  | 1.32  | 2.15   | -1.01  | -5.12  | 2.22  | 1.60  | -6.86  | 0.45   | -0.84 | -2.01  | 1.36   | 0.13  | 0.96  | 1.32  | 1.02  | 0.76  | -0.08  | 0.49   | 0.87  | 1.08  | 0.09  |
| 331 | 210 | 3  | R | -1.41 | -0.85  | 2.89  | 1.89  | 0.53   | -0.40  | 0.73   | 2.20  | 0.21  | -1.70  | 0.78   | 1.52  | -0.20  | 2.16   | -0.34 | 0.68  | 0.39  | 0.64  | 1.22  | 0.33   | -0.48  | -0.27 | 1.07  | 0.59  |
| 332 | 210 | 3  | G | 1.43  | 1.99   | 2.83  | 1.45  | 1.20   | 2.41   | 4.36   | 1.06  | 1.45  | 1.45   | -1.13  | 1.17  | 2.43   | 6.56   | 1.12  | 0.48  | 1.16  | 1.74  | 0.33  | 0.66   | 1.87   | 1.62  | 1.40  | 0.52  |
| 333 | 210 | 3  | B | -0.28 | 3.17   | 1.68  | 1.57  | 0.50   | 3.54   | 6.52   | 1.41  | 2.43  | 4.18   | 1.91   | 2.29  | 2.61   | 7.32   | 0.24  | 1.76  | -0.87 | -0.49 | 1.68  | 1.54   | 0.14   | 0.62  | 1.68  | -0.11 |
| 334 | 210 | 4  | R | 2.93  | 2.83   | 1.32  | 1.58  | -4.94  | -4.33  | -7.11  | -2.59 | -1.58 | -2.59  | 1.72   | -3.76 | -5.40  | -10.12 | 4.50  | 4.44  | 7.06  | 5.77  | 4.83  | 5.31   | 3.82   | 5.02  | 2.79  | 3.28  |
| 335 | 210 | 4  | G | 3.65  | 1.05   | -2.06 | 2.28  | -10.48 | -13.68 | -18.41 | -3.46 | -3.09 | -10.41 | 1.91   | -4.71 | -7.84  | -14.86 | 6.97  | 6.58  | 12.34 | 8.67  | 6.52  | 6.76   | 9.58   | 8.25  | 3.82  | 4.70  |
| 336 | 210 | 4  | B | -0.39 | 5.68   | -2.99 | 3.86  | -2.36  | -4.93  | -0.82  | 0.26  | -0.39 | 0.01   | 3.11   | -1.43 | -2.73  | -3.04  | -5.94 | -1.64 | -2.96 | -3.65 | -2.62 | -3.18  | -1.70  | -2.65 | -4.27 | -4.37 |
| 337 | 210 | 5  | R | 3.88  | -10.17 | 3.99  | -1.67 | -7.90  | -25.26 | -22.48 | 0.45  | -1.47 | -31.17 | -2.39  | -3.55 | -20.57 | -8.50  | 3.54  | 1.11  | 4.32  | 5.77  | 4.79  | 2.25   | 2.83   | 4.16  | -2.05 | 3.06  |
| 338 | 210 | 5  | G | 0.54  | -1.67  | 0.96  | -0.92 | -5.25  | -12.70 | -10.53 | -0.19 | -1.62 | -14.17 | -0.79  | -3.35 | -5.60  | 2.24   | 0.66  | 0.39  | 0.86  | 0.11  | 0.46  | 0.59   | 0.59   | 0.13  | -2.74 | -1.30 |
| 339 | 210 | 5  | B | 0.01  | -0.20  | 0.86  | 0.41  | -0.26  | 0.80   | -1.33  | -0.41 | 0.57  | -1.55  | 0.62   | 0.87  | 0.61   | 10.20  | -0.35 | -0.26 | -0.23 | 0.85  | 0.32  | -0.28  | -0.83  | 0.36  | 0.67  | -0.26 |
| 340 | 210 | 6  | R | 2.28  | 2.58   | 2.94  | 4.12  | 2.33   | 3.27   | 3.10   | 2.21  | 1.29  | 2.62   | 1.72   | 2.14  | 1.43   | 3.18   | 2.10  | 1.11  | 2.15  | 1.32  | 2.42  | 0.96   | 0.52   | 2.05  | 1.58  | 0.29  |
| 341 | 210 | 6  | G | -1.51 | -0.35  | 0.81  | -0.99 | -0.18  | -1.45  | -1.13  | -0.35 | -0.39 | -0.91  | 0.29   | -0.08 | -0.74  | 0.93   | -1.25 | 0.50  | -0.79 | -0.39 | -0.94 | -0.34  | -1.08  | -0.80 | -0.82 | -0.99 |
| 342 | 210 | 6  | B | 3.96  | 2.35   | 1.60  | 2.82  | 1.81   | 3.07   | 2.49   | 2.81  | 4.01  | 2.71   | 0.74   | -0.01 | 1.59   | 4.46   | 1.69  | 3.03  | 2.39  | 2.23  | 2.47  | 2.14   | 2.12   | 1.91  | 4.29  | 1.27  |
| 343 | 210 | 7  | R | -4.31 | -2.12  | -1.13 | -0.84 | -1.33  | -3.18  | -2.46  | -1.52 | -2.79 | -4.03  | 1.42   | -0.88 | -2.13  | -2.08  | -2.83 | -1.68 | -2.72 | -3.00 | -2.86 | -3.88  | -2.86  | -3.22 | -0.72 | -0.46 |
| 344 | 210 | 7  | G | -1.62 | -1.12  | -1.26 | -0.83 | -1.56  | -2.05  | -1.32  | -0.89 | -1.52 | -1.62  | 0.13   | -1.55 | -1.52  | 0.83   | -2.23 | -1.66 | -1.62 | -1.97 | -1.39 | -2.08  | -1.63  | -1.14 | -0.89 | -0.19 |
| 345 | 210 | 7  | B | -1.03 | -1.61  | -0.26 | 0.30  | -1.11  | 0.52   | -1.20  | -0.93 | 1.11  | 1.27   | 0.60   | 0.55  | -0.52  | -0.91  | -0.35 | -1.35 | 0.43  | -0.19 | -0.81 | -0.75  | -0.01  | -0.74 | -0.83 | -0.50 |
| 346 | 210 | 8  | R | 1.49  | 3.57   | 4.15  | 3.67  | 1.32   | 3.18   | 5.20   | 2.14  | 2.54  | 1.85   | 0.21   | 3.48  | 4.53   | 7.89   | 1.55  | 2.26  | 2.72  | 3.17  | 2.24  | 2.69   | 1.22   | 3.71  | 3.27  | 2.77  |
| 347 | 210 | 8  | G | 1.90  | 3.53   | 2.50  | 0.63  | 1.66   | 4.60   | 7.37   | 2.02  | 3.18  | 5.56   | 1.48   | 0.53  | 4.48   | 10.56  | 1.62  | 1.23  | 1.90  | 1.33  | 2.06  | 1.77   | 2.82   | 0.85  | 1.70  | 0.86  |
| 348 | 210 | 8  | B | 1.78  | -0.55  | 2.26  | -1.72 | -0.32  | -2.52  | -0.21  | 0.61  | 1.41  | -1.18  | 1.64   | 1.54  | 1.17   | 8.03   | 0.84  | 0.19  | 1.81  | -0.88 | 0.63  | -1.20  | 0.61   | -0.50 | 1.33  | 1.70  |
| 349 | 210 | 9  | R | 1.68  | -1.03  | 3.70  | 1.15  | -0.08  | -5.60  | -4.01  | 0.92  | 0.69  | -1.91  | -11.99 | 1.60  | -3.90  | -0.75  | 3.67  | 2.94  | 2.75  | 1.32  | 1.43  | 2.67   | 2.23   | 2.31  | 0.58  | 2.23  |
| 350 | 210 | 9  | G | 2.94  | -4.30  | 3.77  | -0.27 | -1.57  | -12.16 | -8.38  | 2.10  | 2.12  | -5.72  | -14.09 | 0.07  | -6.01  | -3.47  | 4.02  | 4.87  | 4.30  | 3.59  | 2.46  | 5.89   | 6.70   | 4.65  | 1.79  | 5.54  |
| 351 | 210 | 9  | B | 0.84  | -3.46  | 1.09  | 1.15  | -1.06  | -4.29  | -6.64  | 1.71  | -1.01 | -3.23  | -16.88 | 0.83  | -0.46  | 0.19   | 0.00  | -1.14 | 0.12  | -2.64 | -0.87 | -1.10  | -1.28  | -1.36 | -1.49 | -0.11 |
| 352 | 210 | 10 | R | -1.33 | -3.29  | 1.53  | 0.11  | -1.46  | -3.17  | -6.67  | -0.70 | 1.05  | -7.59  | 1.43   | 0.15  | -7.49  | 0.92   | -0.44 | -0.44 | 1.19  | -1.60 | 0.59  | -1.68  | 0.43   | 0.70  | -0.55 | 1.03  |
| 353 | 210 | 10 | G | 0.00  | -5.27  | 2.26  | -0.67 | -0.85  | -4.82  | -10.52 | 0.28  | 2.06  | -8.25  | 0.58   | 0.12  | -10.03 | 0.68   | 0.46  | 1.74  | 1.94  | -0.92 | -0.04 | -0.08  | 2.38   | 2.86  | -2.48 | 1.67  |
| 354 | 210 | 10 | B | -1.66 | -2.61  | 0.21  | -0.93 | -0.41  | -4.56  | -3.81  | 0.76  | -0.54 | -7.21  | 2.49   | 0.43  | -0.03  | -1.06  | -4.84 | -1.40 | -1.13 | -2.72 | -1.13 | -1.49  | -2.74  | 0.23  | -3.57 | -2.21 |
| 355 | 210 | 11 | R | -1.10 | -0.07  | 2.23  | 1.36  | 0.90   | 1.68   | 1.75   | 0.08  | 2.21  | 0.59   | 4.55   | -0.20 | 1.56   | -0.83  | 0.53  | -0.18 | 0.30  | -0.99 | 0.72  | -0.35  | 0.94   | 0.80  | 0.08  | -0.08 |
| 356 | 210 | 11 | G | -0.57 | 0.85   | 0.26  | 0.21  | 0.95   | -0.34  | -0.15  | -0.10 | -0.67 | -0.24  | 1.18   | 0.18  | -0.39  | 2.90   | -1.97 | -1.11 | -0.32 | -0.02 | -0.16 | -0.33  | -0.53  | -0.60 | -0.82 | 0.59  |
| 357 | 210 | 11 | B | 2.30  | 0.69   | 1.12  | 0.98  | -0.87  | 2.93   | 1.68   | -1.29 | 1.69  | 2.35   | 0.86   | 0.00  | -1.41  | 0.99   | -1.12 | 0.28  | 0.23  | 0.00  | 2.50  | -0.74  | -0.09  | 1.01  | 1.06  | 0.75  |
| 358 | 210 | 12 | R | -9.33 | 1.02   | -6.85 | 0.94  | 1.33   | 0.39   | 1.23   | 0.81  | -9.17 | -1.33  | 0.77   | -0.77 | -0.31  | 0.37   | -9.07 | -7.36 | -6.44 | -9.66 | -7.28 | -10.10 | -6.49  | -7.20 | 0.84  | -1.19 |
| 359 | 210 | 12 | G | 1.01  | 0.58   | 2.09  | 0.78  | 0.31   | 1.46   | 0.24   | 0.17  | 1.26  | 1.74   | 1.79   | 1.30  | 1.12   | 0.93   | 0.53  | 0.61  | -0.36 | 0.82  | 1.33  | 0.22   | 0.92   | 1.22  | 0.84  | 1.08  |
| 360 | 210 | 12 | B | 5.88  | 2.01   | 10.39 | 3.12  | 0.42   | 1.19   | 0.82   | 2.20  | 2.31  | 2.90   | 1.06   | 1.30  | 1.32   | 3.01   | 9.94  | -0.47 | 2.53  | 0.35  | -0.16 | 1.96   | 0.77   | -0.19 | 1.44  | 2.35  |
| 361 | 210 | 13 | R | 0.93  | 1.43   | 3.90  | 2.45  | 1.38   | 2.59   | 2.01   | 2.01  | 2.07  | 2.28   | 1.16   | 1.48  | 1.64   | 6.39   | 1.33  | 1.18  | 2.24  | 1.40  | 0.86  | 0.14   | 0.43   | 1.43  | 2.49  | 0.43  |
| 362 | 210 | 13 | G | 0.89  | 2.37   | 1.94  | 1.00  | 2.94   | 1.97   | 1.91   | 0.90  | 1.60  | 1.89   | 0.63   | 1.57  | 1.77   | 4.14   | 0.90  | 1.50  | 1.78  | 0.94  | 1.50  | 1.41   | 0.84   | 2.33  | 1.92  | 1.14  |
| 363 | 210 | 13 | B | -0.04 | 0.67   | 1.97  | 1.08  | 1.33   | 2.69   | 2.41   | 1.06  | 1.61  | 1.99   | 1.11   | -0.57 | 2.27   | 0.85   | 0.97  | -0.27 | 0.84  | 1.44  | 1.52  | 0.27   | 1.11   | 0.55  | -1.06 | 1.68  |
| 364 | 210 | 14 | R | 0.35  | -0.79  | 0.68  | 0.33  | 0.28   | -1.99  | -3.21  | 0.10  | -0.11 | -4.35  | 1.94   | 0.91  | -0.97  | -0.82  | 0.18  | -0.88 | 0.53  | -0.13 | 0.46  | -0.79  | -1.24  | 0.75  | -0.37 | -0.52 |
| 365 | 210 | 14 | G | -0.51 | -0.04  | 1.19  | 0.93  | 0.80   | -0.63  | -1.78  | 0.13  | 0.86  | 0.25   | 1.27   | 0.54  | -0.06  | 0.87   | -0.29 | 0.38  | 0.30  | -0.51 | 0.74  | 1.28   | 0.65   | 0.03  | -0.93 | -0.21 |
| 366 | 210 | 14 | B | -1.07 | 0.72   | 1.29  | 2.26  | 1.32   | 4.02   | 0.61   | 2.64  | 2.57  | 2.85   | 1.27   | 1.59  | 3.84   | 4.81   | 2.44  | 0.91  | 1.44  | 0.86  | 1.36  | 0.50   | -1.38  | -1.06 | 3.09  | 1.15  |
| 367 | 210 | 15 | R | 2.01  | 2.33   | 4.73  | 2.30  | 2.25   | 1.29   | 2.59   | 1.08  | 1.80  | 0.71   | -0.60  | 2.55  | 3.21   | 3.45   | 0.45  | 1.27  | 1.85  | 0.69  | 1.30  | 0.54   | 0.14   | 0.64  | -0.33 | 0.84  |
| 368 | 210 | 15 | G | 1.09  | 1.12   | 0.96  | 0.53  | 1.14   | 1.69   | 3.49   | 0.05  | 0.49  | 2.03   | -0.20  | 0.70  | 3.34   | 4.47   | 0.56  | 0.17  | 0.12  | 1.42  | 0.08  | -0.01  | 1.14   | 0.80  | 1.64  | 0.75  |
| 369 | 210 | 15 | B | -1.25 | 0.46   | -0.01 | 0.48  | -1.36  | -0.14  | 1.28   | -0.98 | -1.30 | -0.52  | 0.39   | 1.57  | 0.66   | 1.27   | -0.64 | -1.25 | 1.95  | -0.26 | 0.69  | -0.51  | 0.72   | -1.24 | 0.11  | -0.81 |
| 370 | 210 | 16 | R | -0.03 | -4.77  | 1.47  | 0.51  | -0.83  | -3.83  | -3.79  | -1.02 | -2.95 | -7.79  | 3.22   | 0.67  | -6.03  | -1.78  | 0.28  | 0.54  | 0.08  | 0.07  | 1.10  | -0.16  | -0.52  | 0.32  | -0.97 | 1.86  |
| 371 | 210 | 16 | G | 0.67  | -1.53  | 0.98  | -0.43 | -0.08  | -1.51  | -3.51  | 0.02  | 0.33  | -8.15  | 0.42   | -0.63 | -8.18  | -0.12  | 1.65  | 0.72  | 0.52  | 0.75  | 0.70  | 1.42   | 2.24   | 0.22  | -1.75 | 2.89  |
| 372 | 210 | 16 | B | 0.03  | -5.37  | -3.26 | -0.98 | -0.26  | -6.17  | -4.61  | 0.68  | -4.50 | -9.90  | -0.01  | -0.55 | -7.43  | -2.79  | -4.28 | -3.59 | -2.08 | -0.52 | -3.38 | -2.77  | -2.87  | -2.80 | -3.83 | -1.18 |
| 373 | 210 | 17 | R | 1.06  | 1.93   | 3.00  | 2.88  | 0.50   | 1.57   | 3.81   | 2.23  | 4.07  | 2.67   | 0.00   | 3.57  | 4.39   | 4.66   | -0.08 | 1.12  | 0.89  | 0.07  | -1.10 | -1.66  | 0.19   | 0.64  | 0.62  | -0.15 |
| 374 | 210 | 17 | G | 0.72  | 4.76   | 2.95  | 3.78  | 5.71   | 5.44   | 6.38   | 5.51  | 3.59  | 5.51   | 2.33   | 4.30  | 4.90   | 8.64   | -1.04 | -0.43 | 0.64  | 1.23  | 1.17  | 1.23   | -0.88  | 0.58  | 0.95  | -0.06 |
| 375 | 210 | 17 | B | 1.80  | 0.52   | 1.20  | 1.48  | 0.65   | -0.50  | 3.00   | -0.34 | 0.97  | 2.28   | 0.61   | 3.83  | -1.95  | 5.35   | 1.96  | 0.82  | 1.16  | 0.84  | 1.92  | 1.57   | 3.00   | 1.32  | 2.63  | 0.26  |
| 376 | 210 | 18 | R | -9.27 | -7.97  | -6.92 | -8.01 | -5.38  | -5.47  | -7.28  | 8.06  | -9.47 | -7.52  | 1.70   | -6.84 | -6.31  | -6.85  | -7.83 | -8.08 | -8.19 | -9.46 | -8.96 | -10.48 | -10.77 | -9.69 | -6.98 | -8.48 |
| 377 | 210 | 18 | G | 0.65  | 0.60   | 1.01  | 0.48  | 1.87   | 1.05   | 1.41   | 1.10  | 0.84  | 0.98   | 2.16   | -0.46 | 0.     |        |       |       |       |       |       |        |        |       |       |       |

|     |     |    |   |        |        |       |       |        |        |        |       |       |        |        |       |        |        |        |       |        |        |       |        |        |        |       |       |
|-----|-----|----|---|--------|--------|-------|-------|--------|--------|--------|-------|-------|--------|--------|-------|--------|--------|--------|-------|--------|--------|-------|--------|--------|--------|-------|-------|
| 439 | 240 | 3  | R | -2.39  | -0.96  | 3.66  | 1.78  | 1.08   | -2.60  | 1.57   | 0.62  | -0.23 | 0.80   | -0.77  | -0.41 | 1.58   | 1.41   | -1.17  | -0.63 | -0.19  | 1.21   | 0.51  | 1.45   | -0.71  | 0.31   | 0.26  | 0.60  |
| 440 | 240 | 3  | G | 1.18   | 2.06   | 3.80  | 1.47  | 1.32   | 1.81   | 5.04   | 1.58  | 2.23  | 3.45   | -1.80  | 0.89  | 2.51   | 5.78   | 1.01   | 1.06  | 1.26   | 0.52   | 0.99  | 1.37   | 1.69   | 1.63   | 1.84  | 0.43  |
| 441 | 240 | 3  | B | -0.13  | 4.35   | 2.17  | 1.89  | 2.44   | 2.39   | 6.75   | 1.16  | 2.82  | 4.70   | 0.64   | 3.87  | 5.55   | 7.33   | 0.74   | 1.81  | 0.57   | 0.27   | 0.64  | 1.17   | -0.31  | 2.48   | 1.79  | 0.11  |
| 442 | 240 | 4  | R | 1.27   | 1.14   | 1.94  | 1.10  | -3.52  | -5.47  | -5.43  | -3.01 | -1.35 | -2.21  | 1.94   | -4.71 | -8.54  | -7.83  | 5.46   | 6.24  | 8.74   | 9.39   | 7.39  | 8.30   | 5.79   | 6.65   | 5.82  | 5.78  |
| 443 | 240 | 4  | G | 2.23   | 0.71   | -0.65 | 1.69  | -12.06 | -13.83 | -21.17 | 3.54  | -2.42 | -9.62  | 1.06   | -3.84 | -13.69 | -14.64 | 10.90  | 9.88  | 18.39  | 15.91  | 11.09 | 11.98  | 15.08  | 10.19  | 9.17  | 8.53  |
| 444 | 240 | 4  | B | -2.19  | 3.80   | -4.35 | 2.36  | -2.81  | -4.75  | -7.19  | 1.19  | -2.32 | -0.03  | 1.80   | -3.31 | -9.05  | -2.72  | -6.66  | -3.24 | -4.30  | -4.01  | -3.52 | -5.86  | -4.89  | -6.64  | -6.67 | -9.12 |
| 445 | 240 | 5  | R | 3.92   | -10.81 | 5.87  | -0.84 | -7.93  | -28.97 | -25.89 | 2.08  | -0.99 | -29.79 | -2.85  | -5.05 | -21.80 | -9.22  | 5.30   | 2.03  | 6.97   | 9.01   | 8.67  | 5.36   | 6.08   | 6.67   | 2.12  | 4.66  |
| 446 | 240 | 5  | G | -0.01  | -1.00  | 1.39  | -0.65 | -5.18  | -14.62 | -12.11 | 1.10  | -1.96 | -13.71 | -2.06  | -3.81 | -7.31  | 2.79   | 0.05   | 0.73  | 1.76   | 0.82   | 1.37  | 0.71   | 0.46   | 0.48   | -2.10 | -1.09 |
| 447 | 240 | 5  | B | 0.03   | -0.29  | 0.54  | -0.27 | -0.15  | 0.71   | -1.30  | 0.43  | 0.83  | -0.81  | -1.19  | -0.06 | 2.24   | 12.59  | 0.18   | -0.52 | -0.38  | -0.29  | -1.17 | -0.09  | -0.82  | -0.03  | 0.32  | -0.12 |
| 448 | 240 | 6  | R | 0.37   | 2.06   | 4.39  | 3.72  | 3.24   | 2.35   | 3.03   | 3.38  | 3.10  | 4.11   | -0.34  | 1.70  | 1.93   | 3.84   | 1.23   | 1.92  | 2.18   | 1.43   | 3.54  | 1.74   | 1.53   | 3.01   | 2.20  | 0.90  |
| 449 | 240 | 6  | G | -1.27  | -0.41  | 1.88  | -0.36 | -0.61  | -2.14  | -1.14  | 0.79  | -0.71 | 1.03   | -0.10  | 1.10  | -0.48  | 0.90   | -0.40  | -0.99 | -0.31  | -1.15  | -0.76 | 0.63   | -1.11  | -1.28  | -1.28 | -0.20 |
| 450 | 240 | 6  | B | 3.90   | 1.55   | 2.64  | 3.08  | 2.25   | 3.18   | 2.94   | 3.56  | 3.84  | 3.93   | 1.00   | 0.90  | 0.74   | 5.93   | 1.67   | 2.36  | 3.45   | 1.52   | 3.59  | 2.08   | 2.91   | 2.95   | 4.43  | 0.16  |
| 451 | 240 | 7  | R | -6.06  | -2.58  | -2.86 | -0.77 | -1.59  | -4.96  | -2.81  | -2.88 | -2.97 | -3.53  | 1.01   | -1.59 | -2.88  | -2.59  | -2.99  | -2.43 | -3.01  | -3.26  | -3.29 | -3.63  | -3.14  | -3.30  | -4.03 | -1.38 |
| 452 | 240 | 7  | G | -3.59  | -1.22  | -1.40 | -0.59 | 0.80   | -2.78  | -1.43  | -0.67 | -1.69 | -0.75  | -0.33  | -2.27 | -1.78  | 0.17   | -2.62  | -1.67 | -2.18  | -2.14  | -1.57 | -1.72  | -1.52  | -0.58  | -1.13 | -1.46 |
| 453 | 240 | 7  | B | -0.59  | -1.67  | 0.47  | -0.03 | 0.48   | -1.08  | -0.94  | -0.14 | 0.79  | 2.06   | -0.60  | -0.94 | 0.94   | -0.56  | -0.09  | -1.68 | 0.96   | -0.48  | -0.03 | -0.23  | 0.75   | 0.06   | -1.64 | 0.37  |
| 454 | 240 | 8  | R | 0.48   | 3.12   | 6.46  | 5.31  | 2.54   | 1.63   | 6.61   | 3.10  | 2.74  | 4.30   | 0.37   | 1.90  | 4.56   | 7.30   | 0.93   | 2.32  | 4.13   | 3.02   | 1.66  | 3.29   | 2.54   | 4.09   | 3.11  | 3.12  |
| 455 | 240 | 8  | G | 2.03   | 4.13   | 3.59  | 2.99  | 2.27   | 4.83   | 8.03   | 2.13  | 4.26  | 6.26   | 0.50   | 1.11  | 6.62   | 11.81  | 1.09   | 0.77  | 2.12   | 1.52   | 2.02  | 1.54   | 2.55   | 1.44   | 2.10  | 0.82  |
| 456 | 240 | 8  | B | 2.31   | 1.26   | 1.64  | 2.25  | 0.14   | -1.76  | 0.26   | 1.16  | 1.17  | -0.39  | 0.79   | 0.31  | 1.13   | 8.45   | 1.28   | 0.38  | 1.91   | 0.40   | 2.55  | 1.28   | 0.61   | 0.28   | 1.70  | 2.04  |
| 457 | 240 | 9  | R | 0.76   | -1.34  | 4.09  | 2.40  | 0.14   | -7.33  | -5.60  | 1.40  | 0.14  | 0.35   | -13.98 | -0.63 | -3.69  | -0.79  | 4.57   | 4.51  | 5.00   | 2.75   | 4.02  | 6.50   | 4.27   | 3.26   | 2.99  | 4.79  |
| 458 | 240 | 9  | G | 3.26   | -5.19  | 5.55  | 0.52  | -1.23  | -13.94 | -9.21  | 4.23  | 3.40  | -6.04  | -15.11 | 0.74  | -8.23  | -3.23  | 6.25   | 7.57  | 6.77   | 5.69   | 4.62  | 8.49   | 9.56   | 6.75   | 3.66  | 8.16  |
| 459 | 240 | 9  | B | 1.77   | -3.28  | 0.89  | 1.61  | -1.11  | -5.50  | -8.03  | 1.30  | 0.34  | -3.34  | -20.73 | 2.07  | -6.39  | 1.16   | -1.03  | -3.83 | -0.57  | -4.22  | -1.31 | -1.29  | -1.60  | -1.99  | -1.21 | -2.19 |
| 460 | 240 | 10 | R | -1.74  | -5.40  | 2.05  | 0.15  | -0.86  | -4.35  | -9.00  | -0.03 | 0.89  | -7.34  | -0.85  | 0.71  | -8.99  | 1.40   | -1.05  | 0.48  | 1.86   | -1.77  | 0.85  | -0.39  | -0.50  | 0.49   | -0.77 | 0.91  |
| 461 | 240 | 10 | G | 0.31   | -6.50  | 1.85  | -0.69 | -0.98  | -5.36  | -12.90 | 0.57  | 2.44  | -8.41  | -0.20  | -0.28 | -11.83 | 0.74   | 0.34   | 1.73  | 3.18   | -0.17  | 1.10  | 1.33   | 1.36   | 3.35   | -2.72 | 2.63  |
| 462 | 240 | 10 | B | -1.88  | -3.12  | -0.03 | -0.40 | -0.19  | -5.50  | -7.03  | 1.50  | -0.29 | -5.88  | 1.71   | 0.29  | -6.19  | -2.06  | -4.23  | -2.41 | -1.54  | -3.32  | -1.60 | -0.86  | -5.22  | -1.74  | -4.35 | -4.10 |
| 463 | 240 | 11 | R | -2.34  | -0.36  | 4.54  | 1.26  | 2.25   | -0.77  | 2.17   | 1.00  | 1.12  | 3.00   | 2.41   | -2.32 | 2.51   | -1.41  | -0.61  | -0.34 | -0.02  | -1.69  | 0.28  | 0.16   | 0.59   | 0.94   | -0.51 | 0.77  |
| 464 | 240 | 11 | G | -1.75  | -0.73  | 0.14  | -0.30 | 0.19   | -0.68  | -0.33  | 0.43  | 0.17  | 1.48   | 2.37   | -0.53 | -0.58  | 2.85   | -1.72  | -1.03 | -0.09  | -0.24  | 0.01  | -0.32  | -0.68  | -0.03  | -0.28 | -0.07 |
| 465 | 240 | 11 | B | 1.69   | 2.38   | 2.56  | 1.39  | 0.76   | 1.92   | 2.38   | 0.70  | 1.29  | 1.50   | 1.18   | -0.97 | 0.49   | 1.17   | -1.13  | 0.23  | -0.39  | 0.21   | 2.06  | 1.59   | -0.13  | 0.89   | 0.27  | 0.19  |
| 466 | 240 | 12 | R | -10.16 | 0.55   | -6.38 | 1.30  | 1.01   | -0.44  | 0.64   | 1.92  | -9.21 | 1.24   | -0.56  | -2.11 | -0.88  | 0.74   | -9.57  | -8.29 | -7.61  | -11.47 | -8.00 | -11.44 | -8.80  | -8.02  | 1.06  | -1.15 |
| 467 | 240 | 12 | G | 0.66   | 1.53   | 2.48  | 0.95  | 0.81   | 0.94   | 1.21   | 1.32  | 1.34  | 3.08   | 0.48   | -0.19 | 2.06   | 0.91   | 0.10   | 0.43  | 0.74   | 0.93   | 2.36  | 1.36   | 0.96   | 1.29   | 0.30  | 1.57  |
| 468 | 240 | 12 | B | 7.80   | 0.41   | 12.21 | 3.55  | 1.40   | 2.96   | 0.43   | 1.70  | 4.48  | 3.96   | 2.12   | 1.19  | 2.08   | 3.32   | 10.37  | 0.57  | 2.49   | 1.64   | 2.10  | 2.72   | -0.01  | 1.91   | 1.02  | 1.88  |
| 469 | 240 | 13 | R | 0.96   | 1.69   | 4.23  | 3.00  | 2.19   | 2.52   | 2.68   | 1.81  | 3.44  | 2.86   | 1.71   | 0.84  | 2.21   | 6.36   | 1.67   | 1.69  | 2.80   | 0.40   | 1.92  | 1.03   | 0.91   | 1.57   | 1.37  | 0.78  |
| 470 | 240 | 13 | G | 0.57   | 2.00   | 2.89  | 1.42  | 3.57   | 1.51   | 2.27   | 1.81  | 1.77  | 3.34   | -0.24  | 1.49  | 2.23   | 4.79   | 0.76   | 1.34  | 2.08   | 1.03   | 1.90  | 2.08   | 1.45   | 2.32   | 2.22  | 1.49  |
| 471 | 240 | 13 | B | 1.78   | -0.47  | 3.68  | 1.68  | 1.67   | 2.25   | 2.48   | 1.01  | 1.86  | 1.92   | 1.59   | -1.18 | 3.28   | 1.37   | 0.44   | 2.18  | 1.78   | 1.23   | 1.06  | 1.95   | 0.78   | 1.93   | -0.04 | 1.50  |
| 472 | 240 | 14 | R | -0.53  | -1.63  | 2.39  | 0.30  | 0.41   | -3.70  | -2.83  | 1.07  | 0.56  | -3.29  | -0.01  | -0.27 | -0.80  | -0.88  | -0.43  | -1.55 | 1.21   | -0.20  | 0.50  | -0.20  | -0.48  | 0.92   | -1.21 | -0.75 |
| 473 | 240 | 14 | G | -0.66  | 0.58   | 2.61  | 1.03  | 0.59   | -0.88  | -1.42  | -1.19 | 1.44  | 0.73   | 0.37   | -0.91 | -0.59  | 1.03   | -1.09  | 0.37  | 0.57   | -0.71  | 0.72  | 1.21   | -0.46  | 1.22   | -0.53 | 0.75  |
| 474 | 240 | 14 | B | 0.52   | 2.48   | 2.77  | 2.88  | 1.61   | 1.83   | 1.02   | 2.83  | 3.09  | 4.26   | 0.77   | 1.51  | 3.02   | 6.74   | 1.92   | 0.11  | 0.85   | 1.13   | 1.25  | -0.10  | 1.25   | 0.28   | 1.96  | 1.52  |
| 475 | 240 | 15 | R | 1.04   | 2.22   | 5.50  | 2.52  | 2.75   | -1.94  | 3.01   | 2.24  | 3.02  | 2.24   | -1.05  | 2.08  | 5.16   | 2.65   | -0.08  | 1.52  | 0.72   | -0.75  | 0.99  | 2.31   | -0.55  | 0.43   | -0.27 | 0.65  |
| 476 | 240 | 15 | G | 0.83   | 1.07   | 0.98  | 0.92  | 1.48   | 1.46   | 4.84   | 0.70  | 1.24  | 2.56   | -0.37  | -0.36 | 3.16   | 4.81   | 0.12   | -0.22 | 1.00   | 1.31   | 1.34  | 1.06   | 1.41   | 1.05   | 1.87  | 0.59  |
| 477 | 240 | 15 | B | -1.57  | 0.25   | 1.57  | 0.28  | 0.63   | -2.19  | -0.69  | -0.43 | 0.11  | -1.30  | -1.03  | 1.55  | 0.85   | -0.06  | -0.48  | 0.45  | 1.15   | -0.59  | -0.52 | -0.55  | 1.64   | 0.81   | -0.72 | 0.19  |
| 478 | 240 | 16 | R | -0.77  | -7.13  | 3.02  | 0.73  | -0.84  | -2.25  | -2.85  | -1.44 | -0.99 | -8.58  | 2.70   | 1.21  | -7.21  | -2.03  | 0.77   | 1.08  | 0.11   | 0.51   | 0.17  | 1.18   | -0.57  | 1.19   | -0.35 | 3.34  |
| 479 | 240 | 16 | G | -0.09  | -4.28  | 2.63  | 0.01  | 0.30   | 0.49   | 1.14   | -1.63 | -0.28 | -8.08  | -0.07  | 0.49  | -9.89  | -8.02  | 1.88   | 1.28  | 1.51   | 1.29   | 1.27  | 1.51   | 2.41   | 0.54   | -1.88 | 3.35  |
| 480 | 240 | 16 | B | -1.53  | -7.51  | -1.29 | -0.16 | -2.34  | -3.55  | -4.60  | -0.52 | -4.22 | -9.10  | 0.39   | 1.70  | -7.84  | -3.81  | -5.32  | -2.97 | -2.35  | -2.80  | -4.23 | -3.35  | -4.27  | -4.43  | -5.79 | -4.06 |
| 481 | 240 | 17 | R | 0.26   | 1.46   | 4.43  | 3.09  | 1.54   | 0.20   | 4.72   | 4.42  | 3.91  | 4.57   | -0.76  | 1.07  | 5.30   | 4.07   | -1.21  | -0.43 | -0.33  | -1.09  | 1.62  | 0.21   | -1.18  | 0.85   | -0.89 | -1.40 |
| 482 | 240 | 17 | G | 0.65   | 4.64   | 3.61  | 4.96  | 6.19   | 5.05   | 7.70   | 6.23  | 3.50  | 7.32   | 2.49   | 4.74  | 6.48   | 9.93   | -1.75  | -1.98 | 0.76   | 0.07   | 0.78  | 0.53   | -1.43  | -0.18  | -0.78 | -2.50 |
| 483 | 240 | 17 | B | 1.42   | 0.74   | 1.59  | 3.68  | 1.11   | -0.78  | 2.61   | 0.68  | 1.92  | 1.78   | 0.43   | 1.90  | -3.09  | 6.61   | 1.15   | -0.15 | 0.71   | 0.69   | 0.97  | 2.49   | 1.74   | 0.14   | 3.31  | 1.03  |
| 484 | 240 | 18 | R | -12.30 | -9.61  | -7.77 | -8.71 | -9.24  | -9.02  | -8.70  | -9.59 | -9.83 | -6.98  | -1.20  | -9.69 | -8.11  | -8.82  | -10.74 | -9.54 | -10.79 | -12.98 | -9.97 | -11.39 | -12.70 | -11.79 | -9.27 | -9.67 |
| 485 | 240 | 18 | G | 0.47   | 0.54   | 1.15  | 0.43  | 1.79   | 0.03   | 0.75   | 1.32  | 0.30  | 1.79   | 1.96   | -1.74 | 0.50   | 2.48   | 0.34   | 0.26  | 1.07   | 0.10   | 1.21  | 1.08   | 1.36   | 1.34   | 0.98  | 1.30  |
| 486 | 240 | 18 | B | 2.23   | -0.57  | 0.58  | -0.13 | 0.07   | 0.28   | -0.84  | 0.49  | 1.84  | -0.03  | 2.68   | -1.46 | 0.13   | 1.38   | 2.00   | -0.64 | 1.54   | 2.14   | 3.08  | 2.91   | 1.88   | 1.96   | 0.56  | 2.43  |
| 487 | 240 | 19 | R | -1.72  | -1.07  | 1.09  | -0.17 | 0.34   | -2.69  | 1.23   | 0.95  | 0.18  | 1.17   | -3.15  | -1.54 | -0.10  | -0.62  | 0.14   | -1.74 | 0.39   | -1.95  | 0.47  | -0.12  | -1.28  | 0.21   | -0.50 | -1.18 |
| 488 | 240 | 19 | G | -2.26  | -0.57  | 0.41  | -0.23 | -0.24  | -1.43  | -1.28  | -0.68 | -0.69 | -0.09  | -2.56  |       |        |        |        |       |        |        |       |        |        |        |       |       |

|     |     |    |   |        |        |        |       |        |        |        |        |        |        |        |        |        |        |        |        |        |        |        |        |        |        |       |        |
|-----|-----|----|---|--------|--------|--------|-------|--------|--------|--------|--------|--------|--------|--------|--------|--------|--------|--------|--------|--------|--------|--------|--------|--------|--------|-------|--------|
| 550 | 270 | 4  | R | 1.54   | 3.45   | 2.57   | 1.57  | -4.38  | -20.31 | -7.15  | -2.90  | -1.51  | -3.09  | 2.54   | -5.06  | -8.52  | -7.35  | 7.37   | 10.72  | 12.56  | 12.10  | 11.06  | 11.08  | 8.46   | 11.88  | 10.19 | 13.44  |
| 551 | 270 | 4  | G | 0.88   | 5.31   | -0.37  | 3.75  | -11.55 | -34.12 | -19.30 | -3.38  | -2.04  | -9.05  | 1.83   | -5.58  | -13.11 | -13.65 | 14.92  | 15.28  | 24.40  | 24.40  | 16.72  | 18.07  | 19.28  | 19.53  | 18.13 | 19.50  |
| 552 | 270 | 4  | B | -2.72  | 5.27   | -2.86  | 4.00  | -2.61  | -19.23 | 1.50   | 1.91   | -2.06  | 0.15   | 3.23   | -1.49  | -8.84  | -1.17  | -10.26 | -6.91  | -6.12  | -7.18  | -6.83  | -8.53  | -8.08  | -7.02  | -9.27 | -12.49 |
| 553 | 270 | 5  | R | 4.50   | -10.43 | 6.35   | 0.11  | -8.40  | -29.01 | -27.68 | 1.35   | -1.08  | -31.34 | -3.26  | -4.34  | -22.51 | -9.98  | 8.00   | 4.47   | 9.83   | 12.69  | 11.74  | 7.91   | 8.47   | 9.28   | 7.18  | 9.42   |
| 554 | 270 | 5  | G | -0.40  | -0.81  | 1.44   | -0.02 | -4.95  | -13.85 | -12.31 | 0.75   | -1.64  | -14.60 | -1.43  | -3.11  | -7.06  | 3.60   | 0.57   | 0.12   | 2.02   | 1.68   | 2.38   | 1.89   | 0.48   | 2.67   | -1.42 | -1.60  |
| 555 | 270 | 5  | B | -0.16  | -0.15  | 1.07   | 0.36  | -0.51  | 1.29   | 0.53   | 0.37   | 0.33   | -0.56  | 0.57   | -0.14  | 0.79   | 13.43  | 0.41   | -0.47  | -0.02  | 0.69   | -0.64  | -0.94  | -0.64  | -0.62  | 0.48  | 0.34   |
| 556 | 270 | 6  | R | 1.93   | 1.90   | 4.05   | 5.50  | 2.89   | 2.89   | 2.63   | 2.56   | 3.51   | 3.07   | 1.34   | 2.26   | 1.06   | 3.89   | 1.80   | 1.05   | 2.45   | 1.50   | 3.58   | 1.93   | 1.22   | 2.73   | 1.94  | 1.17   |
| 557 | 270 | 6  | G | -2.03  | -0.13  | 0.85   | -0.24 | -0.39  | -0.70  | -1.09  | -0.10  | -1.21  | -0.55  | 0.54   | -1.63  | -0.84  | 0.26   | -1.56  | -0.51  | -0.79  | -1.14  | -0.82  | 0.28   | -0.65  | -0.88  | -0.94 | -0.37  |
| 558 | 270 | 6  | B | 5.94   | 3.21   | 1.24   | 2.92  | 2.74   | 3.99   | 3.83   | 2.69   | 5.22   | 4.13   | 0.06   | 2.01   | 3.16   | 6.25   | 1.57   | 2.85   | 3.61   | 4.06   | 3.19   | 2.64   | 2.78   | 1.53   | 2.88  | 2.29   |
| 559 | 270 | 7  | R | -6.74  | -3.08  | -3.65  | -0.23 | -1.65  | -3.45  | -3.21  | -2.51  | -4.17  | -5.06  | 1.86   | -1.08  | -3.51  | -2.86  | -3.06  | -1.71  | -2.30  | -3.03  | -3.11  | -3.06  | -3.14  | -2.40  | -0.97 | -0.49  |
| 560 | 270 | 7  | G | -3.32  | -1.74  | -1.81  | -0.95 | -1.69  | -1.57  | -1.61  | -2.21  | -1.50  | -1.74  | 0.18   | -2.21  | -2.70  | -0.06  | -2.54  | -1.86  | -0.66  | -2.90  | -1.09  | -1.79  | -1.26  | -0.02  | -0.92 | -0.44  |
| 561 | 270 | 7  | B | -0.86  | -2.08  | 1.17   | 0.30  | -1.01  | 0.49   | -0.12  | 0.31   | 0.32   | 0.19   | 0.29   | 0.53   | -0.88  | -0.84  | -0.37  | 0.52   | 0.59   | -0.48  | -0.78  | -1.12  | 0.35   | 0.02   | -0.37 | 0.80   |
| 562 | 270 | 8  | R | 1.58   | 3.19   | 5.97   | 6.86  | 3.27   | 3.71   | 7.88   | 2.94   | 3.86   | 3.44   | 0.57   | 3.26   | 3.57   | 8.39   | 1.85   | 2.65   | 3.83   | 4.58   | 4.73   | 3.42   | 2.93   | 3.81   | 3.05  | 3.01   |
| 563 | 270 | 8  | G | 2.55   | 4.53   | 3.85   | 3.11  | 3.92   | 6.21   | 9.46   | 2.39   | 4.56   | 6.34   | 1.91   | 1.18   | 6.90   | 12.71  | 1.45   | 0.85   | 2.55   | 1.10   | 1.22   | 2.02   | 1.34   | 1.87   | 1.45  | 0.58   |
| 564 | 270 | 8  | B | 2.81   | 0.20   | 2.48   | 0.19  | 0.95   | -0.41  | 0.82   | 1.37   | 1.51   | -3.16  | 1.08   | 0.97   | -0.16  | 8.84   | 1.68   | 1.53   | 2.38   | 1.32   | 2.64   | -0.04  | 2.18   | 2.66   | 1.54  | 2.97   |
| 565 | 270 | 9  | R | 0.28   | -1.80  | 5.11   | 1.91  | 0.45   | -5.30  | -3.96  | 1.71   | 2.02   | -3.26  | -13.08 | 0.50   | -3.76  | -0.89  | 5.91   | 6.93   | 7.13   | 4.29   | 4.51   | 8.57   | 6.25   | 6.20   | 4.10  | 7.78   |
| 566 | 270 | 9  | G | 4.43   | -5.01  | 6.04   | 1.74  | -0.79  | -14.12 | -10.18 | 4.39   | 3.77   | -6.38  | -15.08 | 1.41   | -8.79  | -3.97  | 9.08   | 11.43  | 10.75  | 9.91   | 8.94   | 12.05  | 13.63  | 11.38  | 5.74  | 14.64  |
| 567 | 270 | 9  | B | 2.19   | -3.85  | 2.44   | 1.08  | -1.00  | -6.19  | -8.50  | 1.46   | 0.79   | -4.01  | -20.46 | 2.32   | -6.25  | 2.16   | -1.45  | -4.91  | -0.42  | -5.59  | -2.27  | -2.31  | -2.03  | -2.10  | -3.31 | -4.76  |
| 568 | 270 | 10 | R | -1.15  | -5.38  | 2.30   | 0.99  | -0.67  | -4.48  | -9.04  | -0.47  | 1.51   | -8.99  | 1.47   | 0.82   | -8.87  | 0.28   | -0.92  | 0.86   | 2.08   | -1.83  | 1.77   | -0.90  | 0.97   | 2.18   | -0.69 | 0.64   |
| 569 | 270 | 10 | G | 0.24   | -6.87  | 2.52   | -0.35 | -0.27  | -5.06  | -13.17 | 0.59   | 2.14   | -9.83  | 0.81   | 0.12   | -13.14 | 0.82   | 1.49   | 2.38   | 4.00   | 0.26   | 1.52   | 1.54   | 1.33   | 3.07   | -2.14 | 3.54   |
| 570 | 270 | 10 | B | -2.03  | -3.37  | 0.43   | 0.66  | -1.27  | -3.46  | -7.19  | 0.11   | -0.29  | -8.19  | 1.16   | 0.94   | -6.79  | -2.47  | -5.83  | -3.63  | -2.85  | -4.42  | -4.12  | -2.37  | -5.40  | -1.76  | -6.28 | -6.58  |
| 571 | 270 | 11 | R | -2.62  | 0.88   | 3.31   | 2.63  | 1.72   | 1.76   | 2.82   | -1.00  | 1.31   | 1.68   | 3.98   | -1.08  | 1.07   | -0.49  | 0.30   | -0.24  | 0.97   | -1.39  | 1.29   | 1.27   | -0.36  | 1.40   | 0.35  | 1.14   |
| 572 | 270 | 11 | G | -1.53  | -0.97  | 0.57   | 0.06  | -0.01  | 1.17   | -0.48  | -0.13  | -0.51  | 0.21   | 4.35   | -0.57  | -0.72  | 2.54   | -1.91  | -1.19  | -0.27  | -0.20  | -1.19  | -0.41  | 0.20   | 0.14   | -1.03 | -0.02  |
| 573 | 270 | 11 | B | 1.70   | 2.60   | 2.28   | 1.57  | 0.47   | 2.35   | 1.61   | -1.32  | 0.26   | 1.95   | 0.01   | 0.41   | 0.96   | 1.41   | -0.12  | 0.31   | 0.84   | 0.81   | 1.56   | 0.31   | 0.97   | 0.73   | 2.34  | 0.72   |
| 574 | 270 | 12 | R | -10.83 | 0.23   | -7.65  | 1.68  | 0.96   | 0.28   | 1.34   | 1.18   | -10.22 | 0.22   | 1.93   | -2.54  | -1.88  | 1.05   | -9.95  | -9.62  | -7.70  | -11.41 | -8.30  | -12.88 | -8.85  | -8.09  | 0.97  | 0.33   |
| 575 | 270 | 12 | G | -0.43  | 1.31   | 3.03   | 1.83  | 0.88   | 2.68   | 1.78   | 0.75   | 1.65   | 1.88   | 1.43   | 1.23   | 1.25   | 3.08   | -0.49  | 1.05   | 0.53   | 1.11   | 1.94   | 1.83   | 0.97   | 1.50   | 0.75  | 0.62   |
| 576 | 270 | 12 | B | 7.69   | 1.41   | 13.99  | 4.18  | 1.02   | 2.32   | 2.26   | 2.12   | 4.53   | 2.95   | 2.55   | 2.30   | 4.09   | 3.53   | 13.41  | 0.87   | 2.39   | 1.52   | 1.79   | 3.04   | 1.03   | 1.69   | 0.71  | 1.51   |
| 577 | 270 | 13 | R | 1.13   | 1.41   | 4.21   | 2.93  | 2.82   | 4.05   | 2.59   | 2.00   | 3.18   | 2.07   | 0.72   | 1.36   | 2.72   | 6.82   | 1.81   | 1.88   | 3.55   | 1.03   | 1.81   | 1.07   | 0.77   | 1.51   | 2.17  | 0.80   |
| 578 | 270 | 13 | G | 1.27   | 2.75   | 3.27   | 2.23  | 2.43   | 3.38   | 3.32   | 1.17   | 1.94   | 2.79   | 1.05   | 2.15   | 1.37   | 5.38   | 0.75   | 1.37   | 2.18   | 0.70   | 2.23   | 1.58   | 1.68   | 3.34   | 2.05  | 1.88   |
| 579 | 270 | 13 | B | 0.43   | 0.18   | 2.12   | 1.17  | 3.48   | 1.78   | 2.84   | 1.11   | 2.99   | 2.01   | 1.06   | 0.10   | 3.64   | 2.02   | 0.94   | 0.32   | 1.73   | 1.05   | 2.07   | 1.81   | 1.75   | 0.82   | 0.42  | 1.26   |
| 580 | 270 | 14 | R | -1.11  | -1.87  | 2.09   | 0.02  | 0.57   | -1.86  | -3.06  | 0.96   | 0.25   | -5.07  | 1.38   | 0.41   | -3.18  | -1.54  | -0.62  | -1.72  | 0.11   | 0.33   | -0.14  | 0.23   | -1.84  | 0.46   | -1.49 | -0.60  |
| 581 | 270 | 14 | G | -1.19  | -0.18  | 2.00   | 1.97  | 0.46   | 0.11   | -0.86  | 0.22   | 1.25   | -0.30  | 1.58   | 0.16   | -2.66  | 0.94   | -1.05  | 0.63   | 1.10   | -0.09  | 0.40   | 0.83   | 0.26   | 1.14   | -0.24 | -0.26  |
| 582 | 270 | 14 | B | -0.48  | 2.45   | 2.90   | 1.45  | -0.76  | 2.61   | 2.71   | 2.39   | 2.26   | 3.14   | 0.95   | 0.66   | 2.73   | 5.89   | 1.84   | -0.26  | 1.77   | 1.00   | 1.93   | 0.62   | 0.45   | 0.56   | 1.92  | 1.82   |
| 583 | 270 | 15 | R | 1.10   | 2.30   | 5.39   | 2.86  | 2.52   | 1.40   | 3.77   | 1.64   | 3.11   | 0.30   | -0.70  | 2.73   | 4.34   | 2.88   | -1.01  | 1.13   | 1.37   | -0.08  | 1.38   | 0.58   | -1.51  | 1.10   | -0.89 | -0.73  |
| 584 | 270 | 15 | G | 0.13   | 0.68   | 0.59   | 1.41  | 1.66   | 1.29   | 5.46   | -0.02  | 1.41   | 1.88   | 0.71   | 0.36   | 3.84   | 4.74   | 0.26   | 0.43   | 1.56   | 1.35   | 1.13   | 0.91   | 1.76   | 1.19   | 1.96  | 1.31   |
| 585 | 270 | 15 | B | 0.27   | -0.56  | 1.28   | 1.62  | -1.88  | -1.30  | 0.74   | -2.27  | -1.03  | -0.90  | -0.57  | 1.21   | 0.35   | -0.06  | -0.97  | 0.34   | 1.68   | -1.76  | -0.06  | -0.59  | 0.90   | -0.31  | -0.32 | -0.87  |
| 586 | 270 | 16 | R | 0.38   | -7.10  | 1.97   | 0.98  | -0.48  | -3.59  | -3.51  | -2.46  | -3.08  | -8.04  | 4.29   | 1.90   | -7.92  | -2.38  | 1.43   | 1.80   | 2.11   | 0.51   | 1.38   | 1.19   | 0.22   | 1.88   | 0.04  | 4.34   |
| 587 | 270 | 16 | G | 0.13   | -4.78  | 0.83   | -0.40 | 0.52   | -1.40  | -2.57  | -1.95  | 0.57   | -9.46  | 0.46   | 0.03   | -11.62 | -1.35  | 2.46   | 1.78   | 1.59   | 2.27   | 2.43   | 2.21   | 3.32   | 2.19   | -1.62 | 3.91   |
| 588 | 270 | 16 | B | 0.69   | -7.73  | -2.46  | 0.74  | 0.57   | -5.54  | -5.38  | -0.67  | -4.78  | -9.61  | -0.76  | 2.61   | -9.76  | -3.55  | -6.95  | -4.62  | -4.13  | -5.56  | -7.08  | -6.30  | -6.63  | -5.24  | -8.32 | -6.74  |
| 589 | 270 | 17 | R | 0.24   | 1.99   | 5.13   | 4.50  | 2.14   | 1.51   | 4.32   | 4.29   | 4.20   | 3.62   | 0.51   | 1.83   | 4.97   | 5.28   | -3.45  | -1.79  | -1.02  | -0.39  | 0.06   | -2.28  | -0.94  | -4.44  | -2.35 | -2.41  |
| 590 | 270 | 17 | G | 1.23   | 4.86   | 3.50   | 5.41  | 5.97   | 6.72   | 8.34   | 6.37   | 4.40   | 7.48   | 3.31   | 5.34   | 6.20   | 10.50  | -2.15  | -3.94  | -1.56  | -1.53  | -1.00  | -0.59  | -3.94  | -1.33  | -6.26 | 6.21   |
| 591 | 270 | 17 | B | 1.71   | 0.31   | 0.71   | 2.19  | 2.27   | 1.09   | 2.57   | 1.07   | 1.39   | 1.36   | 1.03   | 2.00   | -2.35  | 6.21   | 1.94   | 0.17   | 1.74   | 0.84   | 1.08   | 2.29   | 0.28   | 1.88   | 2.24  | 1.92   |
| 592 | 270 | 18 | R | -14.05 | -12.28 | -10.93 | -9.88 | -9.75  | -8.99  | -10.46 | -11.72 | -13.35 | -11.04 | 1.50   | -11.01 | -10.44 | -10.33 | -11.79 | -11.79 | -12.28 | -14.21 | -13.13 | -14.07 | -13.10 | -12.94 | -9.24 | -10.37 |
| 593 | 270 | 18 | G | -0.21  | 0.71   | 1.74   | 1.60  | 0.46   | 1.17   | 2.12   | 1.31   | 1.31   | 1.06   | 2.45   | -0.53  | 0.36   | 2.95   | 0.26   | 0.58   | 0.80   | 0.01   | 1.40   | 1.89   | 1.07   | 1.91   | 1.12  | 1.03   |
| 594 | 270 | 18 | B | 2.52   | 0.53   | 0.42   | -0.91 | -0.30  | 1.30   | -0.77  | 1.34   | 1.33   | 0.82   | 3.40   | -1.72  | 0.45   | 2.90   | 2.48   | 0.86   | 2.00   | 2.20   | 2.37   | 4.23   | 1.86   | 3.26   | 0.67  | 3.96   |
| 595 | 270 | 19 | R | -1.49  | 0.39   | 0.41   | 0.39  | -0.32  | 0.19   | 1.07   | -0.19  | 0.18   | -0.83  | -2.69  | 0.23   | -0.99  | -0.22  | -1.42  | -1.17  | 0.90   | -1.27  | 0.44   | 0.24   | -0.52  | 0.60   | -1.12 | -1.43  |
| 596 | 270 | 19 | G | -2.98  | -1.34  | 0.03   | -0.21 | 0.11   | -0.65  | -1.06  | -1.41  | -0.94  | -0.51  | -2.52  | -0.56  | -1.49  | 1.81   | -1.19  | -2.06  | -0.92  | -1.41  | -0.47  | -0.61  | -1.14  | -0.74  | 0.41  | -0.07  |
| 597 | 270 | 19 | B | 0.92   | 1.48   | 1.64   | -0.08 | 0.58   | 2.55   | 0.93   | -0.74  | 2.42   | 1.68   | 2.15   | 0.90   | 1.31   | 4.35   | 1.22   | 1.56   | -0.05  | 1.87   | -0.03  | 1.31   | -0.78  | 1.10   | -0.07 | 0.76   |
| 598 | 270 | 20 | R | -1.94  | -10.20 | 0.92   | -4.35 | -3.78  | 2.74   | -10.57 | -7.54  | -1.96  | 0.04   | 1.01   | -0.78  | -7.94  | 6.72   | 0.91   | 3.11   | 2.62   | 1.17   | 9.81   | 0.94   | -5.50  | 1.15   | -3.52 | -3.33  |
| 599 | 270 | 20 | G | -2.84  | -13.61 | 1.53   | -6.64 | -3.44  | 0.91   |        |        |        |        |        |        |        |        |        |        |        |        |        |        |        |        |       |        |



|     |     |    |   |        |        |        |        |        |        |        |        |        |        |        |        |        |        |        |        |        |        |        |        |        |        |        |        |       |
|-----|-----|----|---|--------|--------|--------|--------|--------|--------|--------|--------|--------|--------|--------|--------|--------|--------|--------|--------|--------|--------|--------|--------|--------|--------|--------|--------|-------|
| 661 | 300 | 5  | R | 3.96   | -9.67  | 6.52   | 0.00   | -6.43  | -29.94 | -28.86 | 3.80   | 0.40   | -32.56 | -2.20  | -3.91  | -23.11 | -9.94  | 10.69  | 6.26   | 13.77  | 17.93  | 16.17  | 10.36  | 10.70  | 12.91  | 13.46  | 12.30  |       |
| 662 | 300 | 5  | G | 0.09   | -0.88  | 2.45   | -0.40  | -5.57  | -14.76 | -13.23 | 1.76   | -2.14  | -13.61 | -1.88  | -3.24  | -6.24  | 3.80   | 1.47   | 0.13   | 2.83   | 1.79   | 2.81   | 2.57   | 1.89   | 1.81   | -0.18  | -1.26  |       |
| 663 | 300 | 5  | B | 0.53   | -0.64  | 0.39   | 0.21   | -0.15  | -0.08  | -1.63  | -0.57  | 0.68   | -0.23  | 0.74   | 0.08   | 1.19   | 14.28  | 0.42   | -0.63  | -0.42  | 0.43   | -0.37  | -1.54  | -0.38  | -0.27  | 0.45   | 0.17   |       |
| 664 | 300 | 6  | R | 1.12   | 1.92   | 4.01   | 4.32   | 2.77   | 3.05   | 3.82   | 3.26   | 2.02   | 3.84   | 1.31   | 2.43   | 2.77   | 4.54   | 0.94   | 1.49   | 2.74   | 1.77   | 4.21   | 2.94   | 1.28   | 1.81   | 1.08   | 1.02   |       |
| 665 | 300 | 6  | G | -1.69  | -0.58  | 1.42   | -1.37  | -0.95  | -2.02  | -1.35  | 0.81   | -0.54  | 0.47   | 0.59   | -1.34  | -1.28  | -0.12  | -1.08  | 0.70   | -0.43  | -0.29  | -0.40  | -0.48  | -1.62  | -0.39  | -0.63  | -0.59  |       |
| 666 | 300 | 6  | B | 3.79   | 2.34   | 3.82   | 3.86   | 3.55   | 4.89   | 4.17   | 4.21   | 4.65   | 3.94   | 2.04   | 1.97   | 3.90   | 7.62   | 2.12   | 2.99   | 2.60   | 2.59   | 3.01   | 3.70   | 3.40   | 2.55   | 2.23   | 1.96   |       |
| 667 | 300 | 7  | R | -7.32  | -3.85  | -2.97  | -1.46  | -2.35  | -4.77  | -3.30  | -1.99  | -4.85  | -5.14  | 3.83   | -2.29  | -3.97  | -3.00  | -2.58  | -2.21  | -1.42  | -2.58  | -2.79  | -3.41  | -2.07  | -1.36  | -0.66  | 0.16   |       |
| 668 | 300 | 7  | G | -2.73  | -1.54  | -1.87  | -1.86  | -1.86  | -3.03  | -1.54  | -1.93  | -2.31  | -1.78  | 0.51   | -2.21  | -3.13  | -0.95  | -1.87  | -1.44  | -0.09  | -1.83  | -0.86  | -1.86  | -0.64  | 0.52   | -0.81  | 0.79   |       |
| 669 | 300 | 7  | B | -0.02  | -1.97  | 0.23   | 0.72   | -1.41  | -0.22  | -0.69  | -0.50  | -0.17  | 1.26   | -0.72  | -1.01  | -0.67  | -0.20  | -0.62  | -1.24  | 1.33   | 0.32   | -0.41  | -0.68  | 1.40   | 0.28   | 0.36   | 0.05   |       |
| 670 | 300 | 8  | R | 1.38   | 3.60   | 7.07   | 5.25   | 2.75   | 3.73   | 7.40   | 3.85   | 4.51   | 5.32   | 1.18   | 2.53   | 4.35   | 8.42   | 1.68   | 2.36   | 3.92   | 4.58   | 3.58   | 3.03   | 2.96   | 4.61   | 2.29   | 3.08   |       |
| 671 | 300 | 8  | B | 3.12   | 4.90   | 4.28   | 3.32   | 3.70   | 5.71   | 9.56   | 3.23   | 4.37   | 3.88   | 1.55   | 1.89   | 3.38   | 14.21  | 1.55   | 1.21   | 2.17   | 0.96   | 2.25   | 2.18   | 1.30   | 1.06   | 1.18   | 1.23   |       |
| 672 | 300 | 8  | B | 2.85   | 1.00   | 2.65   | 0.13   | -1.37  | -0.79  | -0.23  | 1.74   | 3.46   | -1.21  | 1.79   | 0.13   | -0.12  | 8.27   | 1.56   | 0.70   | 2.59   | 0.92   | 2.52   | 0.28   | 2.65   | 2.43   | 1.45   | 2.43   |       |
| 673 | 300 | 9  | R | 1.53   | -1.84  | 4.48   | 1.77   | 0.22   | -7.02  | -5.44  | 2.34   | 1.66   | -1.86  | -13.47 | 0.36   | -6.28  | -1.68  | 8.73   | 10.50  | 10.02  | 7.74   | 7.98   | 10.69  | 9.30   | 8.24   | 5.48   | 12.55  |       |
| 674 | 300 | 9  | G | 4.40   | -5.28  | 7.76   | 1.54   | -0.65  | -15.55 | -11.05 | 5.56   | 4.71   | -6.62  | -15.65 | 1.66   | -9.39  | -4.04  | 14.33  | 17.35  | 15.29  | 14.13  | 13.60  | 16.64  | 18.99  | 15.83  | 11.00  | 21.16  |       |
| 675 | 300 | 9  | B | 2.45   | -4.50  | 2.46   | 0.50   | -0.72  | -5.19  | -9.29  | 2.12   | 0.77   | -3.30  | -23.83 | 2.04   | -6.88  | 1.68   | -4.61  | -8.00  | -3.39  | -6.22  | -4.77  | -3.20  | -4.24  | -4.26  | -5.54  | -7.65  |       |
| 676 | 300 | 10 | R | -1.65  | -5.74  | 1.74   | -0.17  | -0.87  | -5.03  | -9.29  | 0.13   | 0.79   | -10.17 | 1.49   | 0.68   | -10.25 | -0.58  | -0.85  | 0.99   | 4.10   | 0.06   | 1.39   | 0.94   | 1.84   | 1.01   | -0.83  | 1.41   |       |
| 677 | 300 | 10 | G | 0.14   | -7.86  | 2.77   | -0.12  | -0.48  | -6.08  | -13.14 | 1.40   | 3.02   | -10.46 | 0.98   | 0.01   | -13.27 | -0.28  | 2.40   | 3.52   | 6.05   | 1.24   | 2.73   | 1.79   | 2.48   | 4.37   | -1.71  | 5.16   |       |
| 678 | 300 | 10 | B | -1.97  | -5.67  | 0.83   | -0.42  | -0.79  | -4.94  | -7.80  | 0.52   | -1.74  | -8.35  | 1.20   | 1.12   | -6.24  | -3.14  | -9.06  | -5.65  | -4.82  | -7.42  | -5.62  | -4.30  | -8.00  | -3.07  | -10.09 | -11.15 |       |
| 679 | 300 | 11 | R | -1.89  | 0.15   | 3.97   | 2.07   | 0.57   | 0.33   | 1.35   | 0.93   | 1.10   | 2.15   | 5.62   | -2.01  | 1.54   | -1.99  | -0.43  | 0.40   | 2.10   | 0.08   | 0.62   | 0.90   | 0.77   | 1.10   | -0.56  | 1.11   |       |
| 680 | 300 | 11 | G | -1.54  | -0.67  | 1.41   | -0.54  | 0.53   | 0.19   | -0.04  | 0.35   | -0.93  | 0.70   | 3.68   | 0.38   | -0.92  | 2.44   | -1.84  | -1.15  | 0.17   | -1.26  | -0.13  | -0.28  | -0.66  | -0.53  | -0.35  | 0.25   |       |
| 681 | 300 | 11 | B | 1.71   | 2.59   | 1.30   | 1.37   | 0.10   | 2.52   | 1.58   | -0.87  | 1.31   | 1.96   | 1.03   | -0.99  | 0.75   | 0.88   | 0.13   | 0.25   | -0.21  | 0.80   | 2.41   | 2.52   | 1.01   | 1.38   | 1.74   | 0.54   |       |
| 682 | 300 | 12 | R | -10.88 | 0.79   | -7.16  | 1.33   | 0.48   | 0.35   | 1.30   | 2.01   | -10.39 | 1.35   | 0.87   | -1.78  | -0.94  | 0.27   | -10.89 | -10.03 | -8.15  | -11.99 | -8.73  | -13.88 | -9.26  | -9.55  | 0.21   | 0.11   |       |
| 683 | 300 | 12 | G | 0.19   | 1.39   | 2.80   | 1.48   | 0.13   | 1.44   | 1.64   | 1.64   | 1.04   | 2.26   | 2.26   | 0.88   | 1.77   | 0.35   | 0.31   | 1.38   | 1.23   | 1.05   | 2.14   | 1.57   | 3.77   | 1.72   | 1.16   | 0.70   |       |
| 684 | 300 | 12 | B | 8.81   | 0.12   | 14.05  | 4.89   | 1.50   | 2.73   | 2.67   | 1.17   | 6.18   | 3.75   | 1.82   | 1.68   | 2.51   | 4.77   | 13.24  | 0.75   | 2.93   | 2.45   | 2.05   | 4.37   | 2.09   | 1.36   | 0.06   | 2.80   |       |
| 685 | 300 | 13 | R | 1.30   | 2.42   | 3.36   | 2.92   | 3.59   | 3.51   | 3.26   | 2.72   | 3.83   | 3.20   | 1.73   | 2.06   | 2.14   | 7.01   | 2.86   | 1.47   | 3.39   | 1.16   | 2.00   | 1.76   | 1.36   | 2.53   | 3.02   | 1.09   |       |
| 686 | 300 | 13 | G | 1.32   | 2.18   | 4.55   | 1.82   | 3.26   | 2.59   | 2.63   | 2.32   | 1.86   | 3.73   | 0.07   | 1.39   | 1.88   | 4.66   | 0.66   | 1.45   | 2.29   | 0.89   | 2.12   | 1.86   | 1.55   | 3.47   | 1.53   | 2.08   |       |
| 687 | 300 | 13 | B | 0.88   | 2.04   | 3.06   | 2.28   | 2.51   | 2.54   | 2.66   | 0.95   | 1.90   | 3.01   | 0.82   | 0.02   | 3.25   | 2.36   | -0.05  | 1.55   | 2.60   | 1.63   | 1.40   | 1.79   | 1.46   | 1.87   | -0.23  | 1.66   |       |
| 688 | 300 | 14 | R | -0.93  | -1.60  | 2.48   | 0.23   | -1.16  | -2.44  | -2.23  | 0.90   | 0.25   | -5.06  | 1.68   | -0.23  | -2.26  | -2.27  | -1.26  | -1.23  | 0.95   | 1.28   | 0.66   | 0.29   | -0.57  | 0.71   | -1.29  | -0.49  |       |
| 689 | 300 | 14 | G | -1.31  | 0.29   | 2.66   | 1.21   | 0.17   | 0.12   | -0.98  | 1.28   | 1.24   | -0.56  | 1.47   | -0.88  | -1.51  | 0.40   | -1.41  | -0.35  | 0.79   | -2.01  | 0.69   | 0.61   | -1.08  | 0.84   | -1.22  | -0.66  |       |
| 690 | 300 | 14 | B | 1.01   | 3.00   | 3.77   | 2.03   | 1.41   | 2.97   | 4.28   | 2.64   | 3.43   | 3.84   | 1.23   | 1.65   | 2.88   | 6.07   | 2.25   | 2.04   | 2.34   | 1.75   | 2.26   | 1.17   | 1.33   | 0.57   | 4.24   | 1.45   |       |
| 691 | 300 | 15 | R | 1.23   | 2.71   | 6.96   | 2.35   | 2.30   | 0.20   | 4.98   | 3.02   | 2.93   | 1.38   | -0.32  | 2.92   | 4.29   | 3.48   | -1.53  | 0.06   | 0.78   | -0.76  | 0.52   | 1.08   | -1.19  | 0.21   | -1.97  | -2.22  |       |
| 692 | 300 | 15 | G | 0.28   | 0.85   | 1.59   | 0.72   | 1.30   | 0.06   | 5.34   | 0.73   | 1.67   | 2.19   | 0.45   | 0.14   | 3.17   | 4.60   | 0.72   | 0.85   | 2.06   | 1.48   | 1.66   | 0.59   | 1.89   | 2.07   | 1.19   | 2.14   |       |
| 693 | 300 | 15 | B | -0.88  | -0.77  | 1.23   | 0.05   | -1.38  | -1.41  | 1.85   | -1.32  | -0.83  | -0.61  | 0.59   | -0.13  | 0.88   | 0.41   | -0.65  | 2.00   | 1.32   | -0.25  | -0.50  | -0.11  | 1.84   | 0.70   | 0.14   | -0.55  |       |
| 694 | 300 | 16 | R | 1.19   | -6.41  | 1.37   | 0.72   | -0.99  | -4.93  | -2.16  | -1.79  | -1.10  | -10.46 | 4.52   | 0.66   | -9.63  | -3.13  | 1.99   | 2.49   | 2.50   | 1.47   | 3.23   | 3.02   | 2.59   | 1.12   | 0.91   | 5.41   |       |
| 695 | 300 | 16 | G | -0.01  | -3.99  | 1.47   | -0.79  | 0.57   | -2.32  | -2.74  | -1.23  | 0.14   | -9.67  | 0.64   | -0.81  | -12.16 | -1.87  | 3.57   | 2.00   | 2.81   | 2.65   | 3.16   | 3.44   | 4.70   | 2.48   | -1.03  | 6.41   |       |
| 696 | 300 | 16 | B | 0.11   | -6.93  | -0.91  | 0.45   | -0.36  | -6.80  | -4.28  | 0.00   | -5.33  | -10.75 | -0.63  | -0.46  | -10.11 | -4.05  | -9.52  | -8.23  | -6.91  | -7.63  | -9.26  | -10.62 | -10.57 | -8.44  | -14.53 | -14.56 |       |
| 697 | 300 | 17 | R | -0.29  | 1.59   | 6.13   | 3.49   | 2.08   | 1.81   | 5.65   | 5.05   | 4.38   | 4.08   | 1.31   | 1.81   | 5.12   | 5.56   | -4.76  | -3.27  | -1.54  | -1.70  | -0.84  | -3.27  | -3.33  | -0.99  | -3.63  | -5.40  |       |
| 698 | 300 | 17 | G | 1.08   | 4.34   | 4.37   | 6.23   | 6.63   | 5.96   | 9.22   | 7.11   | 4.44   | 7.63   | 3.72   | 5.90   | 7.50   | 11.53  | -4.06  | -6.32  | -2.88  | -2.42  | -3.12  | -6.95  | -3.12  | -6.30  | -11.41 |        |       |
| 699 | 300 | 17 | B | 1.37   | 1.24   | 2.08   | 2.18   | 0.99   | -0.03  | 1.12   | 0.53   | 0.69   | 1.00   | 2.03   | 2.00   | -4.99  | 6.96   | 1.71   | 1.14   | 1.06   | 1.21   | 1.07   | 1.83   | 1.26   | 1.01   | 2.80   | 1.48   |       |
| 700 | 300 | 18 | R | -15.71 | -13.31 | -12.97 | -12.78 | -12.10 | -12.64 | -12.23 | -13.18 | -14.46 | -11.88 | 1.74   | -11.66 | -12.72 | -12.60 | -12.99 | -12.52 | -13.13 | -15.65 | -14.77 | -14.99 | -15.96 | -15.65 | -11.03 | -12.04 |       |
| 701 | 300 | 18 | G | 0.57   | 0.72   | 2.04   | 0.91   | 2.14   | 1.26   | 2.11   | 2.61   | 0.81   | 1.67   | 2.72   | -0.89  | 0.40   | 2.62   | 0.87   | 0.82   | 0.97   | 0.21   | 1.60   | 2.75   | 1.21   | 1.87   | 1.22   | 1.50   |       |
| 702 | 300 | 18 | B | 1.29   | 2.52   | 0.81   | -1.17  | 1.64   | 1.01   | -0.76  | 1.71   | 1.79   | 0.70   | 4.22   | -0.27  | 1.74   | 3.36   | 2.77   | 2.08   | 3.64   | 2.53   | 3.56   | 4.64   | 2.44   | 4.01   | -1.44  | 3.55   |       |
| 703 | 300 | 19 | R | -0.99  | -0.64  | 1.52   | 0.18   | -0.67  | -1.51  | 1.22   | 0.73   | -0.83  | -1.57  | -3.50  | -1.28  | -2.04  | -1.56  | -1.17  | -0.81  | 1.16   | -0.84  | 0.34   | 0.70   | -1.20  | 0.74   | -1.17  | -0.03  |       |
| 704 | 300 | 19 | G | -2.77  | -0.73  | 0.23   | -0.46  | -0.68  | -0.53  | -1.38  | -1.18  | -0.15  | 0.29   | -2.88  | -0.09  | -1.14  | 2.34   | -1.44  | -2.10  | -0.47  | -1.53  | 0.41   | -0.20  | -0.49  | -0.85  | 0.07   | -0.31  |       |
| 705 | 300 | 19 | B | 0.52   | 0.31   | 1.45   | -0.39  | 2.10   | 1.39   | 3.05   | -0.59  | 0.99   | 1.28   | 2.95   | 1.00   | 1.68   | 5.30   | 0.80   | 1.90   | 0.95   | 1.64   | 0.99   | 1.66   | 1.16   | 2.23   | 0.14   | 0.31   |       |
| 706 | 300 | 20 | R | -1.93  | -7.73  | 0.38   | -4.79  | -2.48  | 2.33   | -8.28  | -0.86  | -0.56  | -1.53  | -0.72  | 1.02   | -1.13  | -8.24  | 8.50   | 0.94   | 3.92   | 3.68   | 1.83   | 11.96  | 0.06   | -5.87  | 1.19   | -3.79  | -4.75 |
| 707 | 300 | 20 | G | -3.51  | -13.93 | 1.10   | -7.32  | -0.82  | 1.50   | -8.02  | -10.23 | -0.78  | -3.15  | 0.61   | -3.45  | -5.35  | 4.60   | 1.01   | 9.03   | 3.83   | 2.87   | 15.46  | 1.37   | -4.63  | 4.17   | -4.66  | -6.45  |       |
| 708 | 300 | 20 | B | -2.77  | -23.02 | 1.17   | -11.43 | -0.67  | -2.44  | -5.86  | -17.15 | 0.50   | -8.06  | 3.65   | -2.96  | -2.26  | 4.29   | 2.03   | 15.67  | 5.93   | 6.88   | 18.11  | 3.77   | -3.39  | 8.57   | -2.70  | -10.05 |       |
| 709 | 300 | 21 | R | 0.94   | -4.82  | 1.63   | -1.21  | -3.15  | -10.01 | -12.07 | 1.97   | -0.53  | -9.61  | -1.67  | 1.19   | -6.64  | -3.21  | 0.76   | 1.88   | 2.18   | 1.65   | 1.11   | 3.06   | 2.09   | 3.49   | 0.77   | 4.69   |       |
| 710 | 300 | 21 | G | 2.18   | -7.81  | 4.45   | -      |        |        |        |        |        |        |        |        |        |        |        |        |        |        |        |        |        |        |        |        |       |

|     |     |    |   |        |        |        |        |        |        |        |        |        |        |        |        |        |        |        |        |        |        |        |        |        |        |        |        |        |
|-----|-----|----|---|--------|--------|--------|--------|--------|--------|--------|--------|--------|--------|--------|--------|--------|--------|--------|--------|--------|--------|--------|--------|--------|--------|--------|--------|--------|
| 772 | 330 | 6  | R | 3.51   | 2.47   | 5.45   | 5.07   | 3.53   | 4.75   | 5.00   | 3.08   | 3.50   | 3.59   | 2.33   | 1.47   | 3.22   | 4.90   | 1.41   | 1.81   | 2.19   | 1.33   | 3.30   | 1.92   | 1.11   | 1.39   | 2.31   | 0.30   |        |
| 773 | 330 | 6  | G | -1.34  | -0.15  | 0.53   | -0.86  | -1.02  | -1.01  | -1.54  | 0.04   | -0.70  | 0.36   | 0.59   | -1.29  | 0.22   | 0.92   | -0.41  | -1.06  | -0.21  | -1.26  | 0.12   | 0.10   | -0.52  | -0.14  | -1.26  | -0.28  |        |
| 774 | 330 | 6  | B | 4.54   | 2.99   | 2.13   | 4.52   | 3.93   | 4.74   | 4.68   | 4.64   | 6.13   | 4.44   | 0.82   | 2.00   | 1.49   | 6.99   | 1.64   | 2.51   | 2.14   | 3.93   | 3.70   | 2.41   | 3.56   | 1.47   | 4.44   | 2.43   |        |
| 775 | 330 | 7  | R | -5.74  | -2.99  | -3.27  | -2.53  | -1.91  | -4.06  | -3.77  | -3.27  | -4.48  | -5.89  | 1.66   | -3.64  | -3.47  | -3.55  | -1.72  | -0.76  | -0.57  | -1.85  | -1.87  | -2.65  | -1.79  | -2.36  | 0.09   | 1.35   |        |
| 776 | 330 | 7  | G | -3.31  | -1.53  | -1.94  | -1.59  | -2.89  | -2.06  | -1.10  | -1.56  | -2.04  | -1.38  | 0.36   | -3.32  | -2.28  | -0.86  | -1.19  | -1.06  | 0.05   | -0.95  | -0.43  | -1.11  | 0.17   | 0.44   | -0.20  | 1.37   |        |
| 777 | 330 | 7  | B | 0.03   | -1.14  | 1.34   | 0.41   | 0.60   | -0.08  | -0.48  | 0.92   | 0.38   | 0.60   | -0.14  | -0.80  | -0.40  | -0.53  | 1.14   | 1.52   | 1.88   | 0.47   | -0.09  | -0.04  | 0.38   | 0.38   | 0.56   | 1.46   |        |
| 778 | 330 | 8  | R | 3.73   | 3.59   | 6.65   | 5.21   | 3.04   | 5.10   | 9.12   | 4.80   | 4.52   | 5.93   | 2.05   | 2.97   | 6.89   | 10.34  | 2.11   | 3.68   | 4.51   | 5.26   | 3.68   | 3.48   | 2.89   | 4.43   | 2.82   | 3.92   |        |
| 779 | 330 | 8  | G | 3.43   | 6.18   | 4.56   | 1.64   | 3.25   | 5.98   | 11.00  | 2.48   | 5.84   | 7.22   | 1.47   | 1.54   | 7.66   | 14.39  | 2.06   | 0.94   | 1.52   | 0.92   | 1.89   | 1.47   | 0.97   | 1.41   | 0.70   | 0.22   |        |
| 780 | 330 | 8  | B | 2.75   | 0.95   | 3.34   | -0.06  | 0.93   | 1.30   | 0.51   | 1.82   | 4.76   | -1.85  | 1.59   | 1.38   | 0.74   | 9.54   | 2.39   | 1.21   | 4.15   | 0.76   | 2.87   | 1.56   | 3.19   | 2.36   | 3.43   | 3.44   |        |
| 781 | 330 | 9  | R | 1.81   | -1.61  | 5.64   | 1.93   | 1.00   | -6.41  | -4.40  | 1.09   | 3.69   | -1.71  | -12.82 | -0.68  | -4.50  | -0.75  | 13.16  | 14.14  | 12.67  | 10.61  | 11.05  | 13.98  | 12.78  | 11.17  | 9.09   | 18.18  |        |
| 782 | 330 | 9  | G | 5.32   | -4.82  | 0.98   | 2.06   | -3.38  | -14.88 | -9.48  | 5.72   | 5.30   | -6.79  | -17.43 | 1.96   | -8.62  | -4.77  | 20.97  | 22.88  | 21.88  | 21.28  | 18.75  | 22.43  | 24.10  | 21.71  | 16.15  | 31.14  |        |
| 783 | 330 | 9  | B | 3.11   | -4.72  | 1.24   | 2.57   | 0.42   | -5.72  | -7.77  | 2.77   | 0.43   | -4.19  | -25.53 | 2.54   | -8.03  | 2.04   | -6.64  | -9.43  | -5.77  | -9.02  | -7.04  | -7.02  | -6.27  | -7.07  | -8.08  | -9.54  |        |
| 784 | 330 | 10 | R | -0.02  | -5.75  | 2.20   | 0.97   | -0.76  | -5.72  | -10.16 | 2.25   | 1.29   | -0.16  | 1.78   | 0.43   | -9.72  | -0.16  | 0.25   | 1.85   | 2.20   | -0.02  | 2.58   | -0.17  | 0.79   | 1.90   | -0.42  | 3.56   |        |
| 785 | 330 | 10 | G | 0.86   | -7.11  | 3.10   | 0.04   | -0.58  | -5.55  | -14.43 | 0.92   | 2.58   | -10.55 | 1.59   | 0.13   | -13.77 | -1.02  | 4.86   | 4.93   | 4.81   | 3.38   | 4.37   | 3.35   | 4.81   | 5.10   | -1.10  | 8.03   |        |
| 786 | 330 | 10 | B | -1.76  | -5.15  | 1.15   | 0.16   | 0.81   | -5.49  | -6.37  | 1.19   | -0.32  | -9.83  | 2.58   | -0.20  | -6.32  | -3.20  | -13.14 | -5.65  | -10.19 | -11.76 | -8.28  | -8.22  | -12.90 | -7.40  | -13.87 | -19.23 |        |
| 787 | 330 | 11 | R | -1.49  | 0.90   | 3.63   | 1.48   | 1.51   | 1.42   | 2.67   | 0.60   | 1.56   | 3.20   | 6.01   | -2.28  | 2.03   | -0.61  | 0.10   | 1.16   | 1.75   | -0.23  | 0.07   | -0.08  | 0.85   | 1.67   | 1.18   | 1.93   |        |
| 788 | 330 | 11 | G | -0.48  | -0.48  | 1.03   | 0.68   | -0.10  | 0.97   | 0.87   | -0.79  | 0.17   | 0.66   | 4.40   | -1.47  | -0.07  | 2.92   | -1.08  | -0.74  | 0.59   | -0.48  | -0.40  | -0.36  | -0.47  | 0.32   | -0.76  | 0.14   |        |
| 789 | 330 | 11 | B | 2.46   | 2.72   | 1.44   | 0.54   | 0.46   | 3.78   | 1.95   | -0.26  | 0.20   | 2.72   | 1.61   | -1.15  | 1.08   | 0.95   | 0.72   | 0.53   | -0.01  | 1.35   | 3.67   | 1.51   | 1.08   | 0.84   | 2.83   | 1.53   |        |
| 790 | 330 | 12 | R | -10.00 | 1.26   | -8.17  | 2.31   | 0.60   | 1.63   | 2.41   | 2.22   | -11.96 | 1.28   | 1.67   | -3.03  | 0.68   | 0.54   | -10.21 | -10.54 | -10.19 | -12.16 | -10.53 | -14.64 | -1.18  | -10.14 | 2.15   | 0.34   |        |
| 791 | 330 | 12 | G | 0.42   | 1.39   | 3.10   | 1.08   | 1.19   | 2.33   | 2.03   | 0.62   | 1.38   | 3.33   | 1.77   | 0.02   | 2.21   | 1.73   | 0.63   | 1.23   | 1.20   | -1.28  | 2.46   | 1.50   | 1.06   | 1.59   | 0.00   | 0.79   |        |
| 792 | 330 | 12 | B | 10.82  | 1.85   | 15.08  | 5.53   | 0.66   | 3.68   | 1.98   | 2.52   | 6.63   | 4.14   | 2.28   | 2.05   | 2.86   | 4.10   | 15.18  | 4.40   | 2.70   | 2.91   | 1.63   | 4.38   | 1.11   | 1.38   | 0.13   | 2.39   |        |
| 793 | 330 | 13 | R | 1.49   | 2.68   | 4.71   | 3.19   | 3.03   | 4.81   | 3.17   | 2.44   | 4.06   | 2.54   | 1.92   | 1.73   | 3.32   | 8.85   | 2.31   | 1.37   | 3.46   | 1.35   | 2.52   | 1.30   | 1.29   | 1.87   | 2.02   | 0.99   |        |
| 794 | 330 | 13 | G | 2.56   | 3.21   | 3.83   | 2.02   | 3.04   | 3.33   | 4.69   | 2.03   | 2.98   | 4.52   | -0.22  | 1.11   | 2.66   | 5.27   | 1.09   | 1.79   | 2.20   | 1.20   | 1.53   | 1.64   | 1.47   | 2.76   | 2.21   | 1.98   |        |
| 795 | 330 | 13 | B | 1.12   | 0.84   | 3.81   | 2.70   | 2.38   | 2.65   | 4.07   | 1.34   | 2.66   | 3.10   | 0.59   | 0.52   | 3.60   | 2.26   | 0.00   | 1.21   | 1.28   | 1.84   | 1.21   | 2.30   | 1.25   | 0.70   | 0.31   | 2.19   |        |
| 796 | 330 | 14 | R | 0.90   | -1.21  | 2.30   | 1.43   | 0.27   | -1.46  | -3.03  | 1.06   | 0.43   | -5.03  | 2.06   | -0.83  | -0.56  | -1.36  | -0.29  | -1.73  | 1.26   | 1.60   | -0.57  | -0.39  | -0.09  | -0.39  | -0.66  | -0.32  |        |
| 797 | 330 | 14 | G | 0.33   | 0.21   | 2.51   | 0.61   | 1.59   | 0.60   | 0.52   | 0.36   | 1.83   | -0.46  | 1.93   | -1.37  | 0.15   | 0.93   | -1.84  | -0.86  | 0.66   | -1.06  | -0.54  | 0.05   | -1.59  | 0.19   | -1.56  | -1.41  |        |
| 798 | 330 | 14 | B | 0.25   | 1.72   | 2.33   | 1.57   | 0.93   | 3.26   | 3.41   | 1.19   | 3.41   | 4.26   | 0.89   | 1.94   | 3.40   | 6.18   | 2.98   | 1.41   | 1.70   | 0.83   | 2.50   | -0.32  | 1.14   | -0.11  | 4.78   | 1.52   |        |
| 799 | 330 | 15 | R | 3.30   | 3.59   | 6.76   | 2.49   | 2.54   | 1.99   | 5.32   | 2.50   | 4.78   | 2.21   | 0.29   | 1.28   | 5.47   | 4.57   | -1.52  | -0.89  | -0.69  | -2.54  | -0.50  | -0.21  | -1.89  | -0.41  | -2.89  | -3.71  |        |
| 800 | 330 | 15 | G | 0.92   | 1.25   | 1.68   | 0.62   | 1.70   | 1.72   | 5.69   | -0.26  | 1.39   | 4.77   | 0.93   | -0.15  | 4.03   | 5.18   | 0.92   | 1.46   | 2.03   | 2.43   | 2.09   | 0.95   | 2.29   | 1.83   | 2.70   | 2.78   |        |
| 801 | 330 | 15 | B | -0.30  | -1.09  | 0.76   | 0.52   | -1.24  | -1.11  | 2.09   | -1.39  | -0.58  | -0.94  | 1.13   | -0.86  | 0.09   | -0.89  | 0.34   | -0.82  | 2.40   | -0.17  | 1.14   | -0.48  | -0.40  | 0.90   | 0.18   | -0.61  |        |
| 802 | 330 | 16 | R | -0.23  | -6.26  | 2.76   | 0.84   | -0.25  | -3.79  | -3.03  | -1.61  | -0.78  | -9.76  | 3.37   | 1.65   | -9.26  | -3.41  | 4.09   | 3.47   | 2.51   | 3.72   | 3.98   | 4.04   | 4.34   | 2.19   | 3.39   | 10.41  |        |
| 803 | 330 | 16 | G | 1.08   | -4.25  | 2.17   | -0.44  | -1.14  | -1.85  | -3.36  | -1.48  | 0.25   | -10.59 | 1.75   | 0.37   | -12.41 | -1.79  | 5.39   | 3.79   | 3.53   | 4.27   | 5.62   | 5.54   | 7.34   | 3.34   | 0.53   | 10.41  |        |
| 804 | 330 | 16 | B | -0.54  | -8.76  | -0.47  | 0.77   | -1.14  | -5.85  | -4.72  | -0.56  | -4.00  | -11.04 | -0.16  | 2.01   | -10.25 | -3.92  | -13.83 | -13.87 | -11.69 | -12.77 | -14.19 | -15.86 | -17.15 | -12.60 | -22.26 | -24.62 |        |
| 805 | 330 | 17 | R | 2.15   | 1.66   | 5.67   | 4.22   | 2.52   | 2.60   | 5.12   | 4.82   | 5.03   | 4.28   | 2.01   | 0.81   | 5.97   | 5.21   | -4.51  | -4.98  | -2.19  | -3.09  | -3.11  | -6.67  | -4.98  | -3.88  | -6.13  | -9.32  |        |
| 806 | 330 | 17 | G | 1.49   | 4.94   | 4.43   | 6.76   | 7.27   | 7.28   | 10.32  | 7.33   | 7.02   | 3.96   | 7.28   | 4.39   | 5.61   | 7.87   | 12.70  | -7.11  | -11.46 | -6.37  | -5.46  | -4.95  | -10.00 | -8.85  | -5.44  | -10.24 | -18.03 |
| 807 | 330 | 17 | B | 1.25   | -0.61  | 2.99   | 2.01   | 1.26   | 1.30   | 2.91   | 2.04   | 2.55   | 1.80   | 2.30   | 2.20   | -4.13  | 7.52   | 1.32   | 1.79   | 1.32   | 2.21   | 1.02   | 0.43   | 1.02   | 0.31   | 2.18   | 1.94   |        |
| 808 | 330 | 18 | R | -16.66 | -15.39 | -15.10 | -15.21 | -13.33 | -11.95 | -13.11 | -15.66 | -16.71 | -14.10 | 2.08   | -13.64 | -13.74 | -12.92 | -12.97 | -14.30 | -15.01 | -17.31 | -15.99 | -14.83 | -17.94 | -18.05 | -12.09 | -13.87 |        |
| 809 | 330 | 18 | G | 1.09   | 1.46   | 2.58   | 1.34   | 1.66   | 1.26   | 2.01   | 2.01   | 1.22   | 2.19   | 3.12   | -1.21  | 1.48   | 3.17   | 0.40   | 0.99   | 0.79   | 0.61   | 1.82   | 1.99   | 1.32   | 1.59   | 1.39   | 2.00   |        |
| 810 | 330 | 18 | B | 2.17   | -0.11  | 0.38   | 0.80   | 1.15   | 2.25   | 0.98   | 1.77   | 3.43   | 0.95   | 3.94   | -1.29  | 1.60   | 4.64   | 3.26   | 3.17   | 4.45   | 3.70   | 3.04   | 4.17   | 4.26   | 3.91   | 0.49   | 4.00   |        |
| 811 | 330 | 19 | R | -0.65  | 0.59   | 1.36   | -0.02  | -0.50  | -1.07  | 2.15   | 0.23   | -0.16  | 0.34   | -0.44  | -1.72  | -0.48  | -0.70  | -0.54  | -1.14  | 0.52   | -1.18  | 0.66   | -0.47  | -0.50  | -1.21  | 0.38   | 0.13   |        |
| 812 | 330 | 19 | G | -2.05  | -0.60  | 0.78   | -0.70  | -0.65  | -0.75  | -0.11  | -1.09  | -0.84  | 0.39   | -3.64  | -0.94  | -0.21  | 2.59   | -0.61  | -1.57  | -0.75  | -0.88  | -0.24  | -0.43  | -0.68  | -1.18  | -0.43  | -0.31  |        |
| 813 | 330 | 19 | B | 1.14   | 0.02   | 1.59   | 0.14   | 2.21   | 2.91   | 2.92   | 3.04   | 2.98   | 0.76   | 2.27   | 0.29   | 0.52   | 5.49   | 1.59   | 2.53   | 0.47   | 1.66   | 1.16   | 2.29   | 0.19   | 1.48   | 0.86   | 0.42   |        |
| 814 | 330 | 20 | R | -0.62  | -7.80  | 2.00   | -5.05  | -2.10  | 3.64   | -2.69  | -8.83  | -1.12  | 0.14   | 0.83   | -1.51  | -6.14  | 9.37   | 0.77   | 4.19   | 2.58   | 0.41   | 8.31   | 0.75   | -2.99  | 0.87   | -2.83  | -3.87  |        |
| 815 | 330 | 20 | G | -1.86  | -12.31 | 1.31   | -8.50  | -2.39  | 2.15   | -1.86  | -11.41 | -1.42  | -3.60  | 0.70   | -2.63  | -3.46  | 6.47   | 1.19   | 8.78   | 3.52   | 2.05   | 11.74  | 1.60   | -2.39  | 3.45   | -5.23  | -6.75  |        |
| 816 | 330 | 20 | B | -2.06  | -22.92 | 1.34   | -13.80 | -3.59  | -1.54  | 2.66   | -18.08 | -0.10  | -8.14  | 4.32   | -2.26  | -2.90  | 5.94   | 3.30   | 16.40  | 8.09   | 3.97   | 14.83  | 2.31   | -1.59  | 8.17   | -2.39  | -9.40  |        |
| 817 | 330 | 21 | R | 1.66   | -4.71  | 2.98   | -0.29  | -2.72  | -9.07  | -12.67 | 2.81   | 0.46   | -9.53  | -1.38  | -0.38  | -6.91  | -3.28  | 1.83   | 3.94   | 3.04   | 2.22   | 1.62   | 4.22   | 3.55   | 3.85   | 1.97   | 6.89   |        |
| 818 | 330 | 21 | G | 2.66   | -8.06  | 5.05   | -1.48  | -1.81  | -13.75 | -15.67 | 3.22   | -0.30  | -12.38 | -4.21  | 0.20   | -9.21  | -5.02  | 3.93   | 4.58   | 3.92   | 4.02   | 3.46   | 5.40   | 4.99   | 3.09   | 2.59   | 6.94   |        |
| 819 | 330 | 21 | B | 0.21   | -2.92  | 2.89   | -1.07  | -3.24  | -4.53  | -4.62  | -0.01  | -2.08  | -3.86  | 0.13   | -1.22  | -3.47  | -6.63  | -10.43 | -14.20 | -7.64  | -8.60  | -11.41 | -9.88  | -13.32 | -9.21  | -15.84 | -22.10 |        |
| 820 | 330 | 22 | R | 0.74   | -1.11  | 3.62   | 0.54   | -1.67  | -2.59  | -2.63  | -0.36  | 1.48   | -3.04  | -0.59  | -1.71  | -5.35  | -1.73  | 1.41   | 2.24   | 2.52   | 3.56   | 2.48   | 2.48   | 2.21   | 3.04   | 2.42   | 6.82   |        |
| 821 | 330 | 22 | G | 4.49</ |        |        |        |        |        |        |        |        |        |        |        |        |        |        |        |        |        |        |        |        |        |        |        |        |

|     |     |    |   |        |        |        |        |        |        |        |        |        |        |        |        |        |        |        |        |        |        |        |        |        |        |        |        |
|-----|-----|----|---|--------|--------|--------|--------|--------|--------|--------|--------|--------|--------|--------|--------|--------|--------|--------|--------|--------|--------|--------|--------|--------|--------|--------|--------|
| 883 | 360 | 7  | R | -7.84  | -3.26  | -4.59  | -2.84  | -2.04  | -4.70  | -3.99  | -3.81  | -5.28  | -6.03  | 2.03   | -2.83  | -5.09  | -3.95  | -0.73  | 0.61   | 0.51   | -0.82  | -0.61  | -2.91  | -1.15  | -1.24  | 1.91   | 2.02   |
| 884 | 360 | 7  | G | -3.65  | -1.86  | -1.67  | -1.71  | -2.36  | -2.78  | -1.73  | -1.49  | -2.65  | -1.77  | 0.86   | -2.49  | -2.45  | -1.41  | 0.31   | 0.48   | 1.65   | 0.05   | 0.28   | -0.72  | 0.37   | 1.20   | 1.30   | 2.63   |
| 885 | 360 | 7  | B | -0.92  | -1.48  | 0.68   | 0.27   | -0.79  | 1.22   | -0.64  | 0.18   | 0.10   | 1.20   | -0.18  | -1.04  | -1.11  | -1.21  | -0.07  | 1.21   | 2.06   | 0.21   | 0.37   | -0.04  | 0.78   | 2.63   | 0.61   | 1.52   |
| 886 | 360 | 8  | R | 2.36   | 4.14   | 7.68   | 6.32   | 3.97   | 4.24   | 9.53   | 4.26   | 4.48   | 5.00   | 1.60   | 3.85   | 5.74   | 8.40   | 2.09   | 4.93   | 4.76   | 5.04   | 4.09   | 4.22   | 3.30   | 4.97   | 2.85   | 3.11   |
| 887 | 360 | 8  | G | 3.31   | 6.48   | 5.42   | 3.47   | 3.18   | 6.85   | 10.61  | 3.81   | 5.62   | 8.07   | 1.14   | 2.27   | 8.28   | 15.38  | 1.17   | 0.38   | 1.12   | 1.08   | 1.40   | 1.15   | 1.45   | 0.96   | 0.76   | 0.07   |
| 888 | 360 | 8  | B | 2.57   | 1.85   | 3.59   | 0.79   | 1.66   | -0.57  | 0.48   | 2.68   | 4.82   | -2.76  | 2.24   | 0.74   | -0.01  | 9.64   | 3.18   | 1.78   | 4.16   | 1.03   | 3.20   | 1.51   | 3.25   | 2.72   | 1.12   | 3.61   |
| 889 | 360 | 9  | R | 1.82   | -1.17  | 7.13   | 3.10   | 0.95   | -6.52  | -2.90  | 2.14   | 2.85   | -0.81  | -14.33 | 1.23   | -4.69  | -1.48  | 17.05  | 16.23  | 17.06  | 14.79  | 14.50  | 17.65  | 14.50  | 15.66  | 11.61  | 21.50  |
| 890 | 360 | 9  | G | 5.86   | -5.47  | 9.12   | 2.83   | 0.01   | -15.05 | -9.17  | 7.18   | 6.24   | -5.17  | -19.33 | 2.41   | -9.19  | -5.06  | 27.52  | 29.14  | 29.18  | 26.52  | 25.02  | 29.78  | 28.57  | 28.09  | 22.68  | 37.72  |
| 891 | 360 | 9  | B | 2.61   | -2.71  | 2.85   | 1.54   | 0.34   | -5.04  | -8.71  | 3.03   | 2.12   | -3.14  | -26.62 | 1.94   | -6.93  | 2.04   | -8.18  | -11.19 | -8.28  | -10.97 | -10.22 | -9.52  | -8.84  | -9.55  | -12.01 | -12.41 |
| 892 | 360 | 10 | R | -1.46  | -6.31  | 2.85   | 0.97   | -0.82  | -5.05  | -9.97  | 0.39   | 1.34   | -10.34 | -0.22  | 0.92   | -9.56  | -0.44  | 2.11   | 2.76   | 4.70   | 0.94   | 2.48   | 3.13   | 2.72   | 2.30   | 0.56   | 4.73   |
| 893 | 360 | 10 | G | 0.61   | -7.39  | 3.34   | 0.18   | -0.19  | -6.93  | -14.22 | 1.17   | 2.17   | -10.68 | 1.35   | 0.47   | -12.60 | -0.66  | 7.60   | 6.99   | 6.75   | 6.18   | 5.70   | 6.41   | 7.84   | 7.21   | 2.85   | 12.80  |
| 894 | 360 | 10 | B | -2.96  | -5.62  | 2.90   | 0.50   | 0.58   | -5.87  | -7.21  | 2.15   | -1.88  | -10.00 | 2.02   | 0.22   | -6.43  | -2.63  | -17.83 | -15.46 | -14.98 | -16.63 | -14.64 | -14.78 | -19.58 | -11.54 | -23.19 | -29.24 |
| 895 | 360 | 11 | R | -1.57  | 0.58   | 4.05   | 1.49   | 1.74   | 1.29   | 2.58   | -0.11  | 1.10   | 3.58   | 5.61   | -1.29  | 1.23   | -1.65  | -0.29  | 0.89   | 2.39   | 0.83   | 0.62   | 0.71   | 0.41   | 0.70   | -0.20  | 0.40   |
| 896 | 360 | 11 | G | -0.92  | -0.64  | 0.93   | -0.27  | -0.17  | 0.36   | 0.98   | -0.52  | -0.72  | 0.75   | 4.61   | -0.56  | -0.26  | 2.90   | -1.62  | -1.18  | -0.26  | -1.03  | -0.37  | -0.66  | -0.44  | -0.19  | -0.44  | 0.36   |
| 897 | 360 | 11 | B | 1.54   | 3.14   | 2.20   | 1.03   | 0.13   | 2.95   | 2.34   | 0.02   | 0.63   | 3.86   | 2.30   | -1.17  | 0.42   | 0.74   | 0.41   | 0.94   | 1.39   | 1.23   | 0.32   | -0.32  | 1.92   | 1.61   | 1.93   | 1.00   |
| 898 | 360 | 12 | R | -10.64 | 0.39   | -6.68  | 1.48   | 0.35   | 0.11   | 2.20   | 1.97   | -13.01 | 2.10   | 3.11   | -1.39  | -0.10  | -0.39  | -10.31 | -11.12 | -10.22 | -12.87 | -10.86 | -15.18 | -10.96 | -10.74 | 0.33   | 0.74   |
| 899 | 360 | 12 | G | -0.19  | 2.30   | 2.68   | 1.48   | 0.48   | 2.06   | 2.57   | 1.15   | 1.82   | 2.95   | 1.30   | 0.67   | 2.35   | 0.98   | 0.44   | 1.37   | 0.75   | 1.50   | 1.97   | 1.72   | 1.21   | 1.08   | 0.91   | 0.52   |
| 900 | 360 | 12 | B | 10.43  | -0.30  | 15.86  | 5.20   | 2.40   | 3.29   | 2.06   | 2.09   | 6.24   | 2.88   | 1.15   | 1.25   | 3.02   | 5.99   | 15.73  | 2.17   | 3.77   | 3.38   | 2.23   | 5.12   | 1.90   | 2.38   | 0.08   | 2.18   |
| 901 | 360 | 13 | R | 1.43   | 2.59   | 3.74   | 3.53   | 3.06   | 4.74   | 3.38   | 1.90   | 4.59   | 2.59   | 0.66   | 2.12   | 3.56   | 8.31   | 2.28   | 1.66   | 3.76   | 0.62   | 1.73   | 1.16   | 0.68   | 1.74   | 2.17   | 0.41   |
| 902 | 360 | 13 | G | 2.05   | 3.31   | 4.90   | 2.13   | 3.23   | 3.45   | 4.33   | 2.41   | 2.37   | 4.56   | -0.03  | 2.48   | 2.66   | 5.34   | 0.83   | 2.26   | 2.34   | 1.26   | 1.71   | 1.62   | 1.41   | 3.02   | 2.46   | 1.35   |
| 903 | 360 | 13 | B | 2.03   | 0.26   | 3.97   | 3.38   | 2.52   | 4.16   | 4.08   | 3.04   | 2.43   | 0.33   | 0.37   | 2.93   | 2.14   | 0.84   | 0.97   | 1.39   | 1.47   | 1.75   | 1.81   | 1.41   | 1.90   | 0.41   | 0.42   |        |
| 904 | 360 | 14 | R | -0.74  | -1.58  | 2.99   | 0.19   | -0.22  | -3.54  | -3.96  | 1.12   | 0.18   | -5.03  | 2.04   | 0.63   | -1.28  | -2.03  | -1.08  | -1.84  | 0.27   | 1.34   | 0.36   | -1.06  | -0.34  | 0.50   | -1.79  | 0.09   |
| 905 | 360 | 14 | G | -0.84  | 0.90   | 3.45   | 1.75   | 0.66   | -0.22  | -1.39  | 0.72   | 1.89   | -0.37  | 1.31   | 0.38   | -0.86  | 0.19   | -1.41  | -1.31  | -0.10  | -2.41  | -0.33  | 0.15   | -2.31  | -1.14  | -2.76  | -3.85  |
| 906 | 360 | 14 | B | 1.11   | 1.23   | 2.50   | 1.60   | 1.61   | 3.06   | 3.87   | 1.72   | 4.06   | 4.66   | 1.09   | 1.42   | 2.89   | 5.71   | 2.80   | 1.72   | 0.99   | 1.46   | 2.30   | 1.64   | 1.89   | 1.74   | 3.12   | 2.72   |
| 907 | 360 | 15 | R | 2.01   | 3.48   | 7.63   | 2.49   | 2.57   | 1.40   | 5.12   | 1.19   | 3.15   | 1.45   | 0.79   | 2.78   | 5.16   | 1.62   | -2.42  | -2.45  | -2.03  | -2.77  | -1.78  | -0.70  | -3.26  | -1.62  | -3.15  | -4.39  |
| 908 | 360 | 15 | G | 1.96   | 1.52   | 1.26   | 0.88   | 1.83   | 2.01   | 6.32   | 0.99   | 1.33   | 4.18   | 1.46   | 0.58   | 3.85   | 4.35   | 1.46   | 1.38   | 3.03   | 2.12   | 1.71   | 1.65   | 2.85   | 3.36   | 3.19   | 2.11   |
| 909 | 360 | 15 | B | -0.75  | -0.07  | 1.88   | 0.63   | -1.40  | -3.20  | 1.33   | -1.55  | -2.42  | -2.89  | -0.61  | 0.05   | 0.76   | -2.87  | 0.32   | 0.47   | 1.97   | -0.04  | 1.28   | -0.52  | 0.41   | 1.35   | 0.15   | 0.05   |
| 910 | 360 | 16 | R | 0.42   | -6.05  | 2.54   | 0.88   | -0.56  | -1.60  | -2.42  | -1.72  | -1.53  | -11.16 | 4.37   | 0.30   | -9.43  | -3.43  | 7.06   | 6.80   | 5.77   | 6.03   | 6.90   | 8.48   | 8.08   | 4.47   | 7.21   | 15.51  |
| 911 | 360 | 16 | G | 0.67   | -4.13  | 2.52   | -0.09  | 0.19   | 1.90   | -2.61  | -1.61  | 0.00   | -11.38 | 0.89   | 0.87   | -12.84 | -1.89  | 8.32   | 7.39   | 5.82   | 7.90   | 8.50   | 9.14   | 11.37  | 5.79   | 4.96   | 15.96  |
| 912 | 360 | 16 | B | -1.24  | -8.35  | -0.40  | 0.54   | -0.44  | -3.11  | -4.14  | -0.54  | -5.12  | -12.61 | -0.96  | 0.78   | -10.32 | -4.01  | -20.01 | -22.97 | -19.50 | -20.31 | -22.50 | -24.09 | -25.97 | -19.12 | -33.92 | -38.50 |
| 913 | 360 | 17 | R | 0.33   | 1.76   | 5.88   | 4.00   | 1.63   | 2.30   | 5.26   | 4.71   | 4.39   | 4.15   | 1.27   | 3.32   | 6.69   | 5.46   | -7.14  | -9.94  | -5.50  | -6.67  | -6.97  | -10.84 | -9.89  | -4.58  | -12.02 | -17.91 |
| 914 | 360 | 17 | G | 1.88   | 4.84   | 5.39   | 7.15   | 8.03   | 6.98   | 10.54  | 7.29   | 3.48   | 7.88   | 4.79   | 6.51   | 8.65   | 12.96  | -10.45 | -18.18 | -10.46 | -9.59  | -9.81  | -13.18 | -17.08 | -8.60  | -17.00 | -29.49 |
| 915 | 360 | 17 | B | 1.89   | 0.44   | 3.32   | 2.77   | 0.97   | 1.00   | 4.28   | 1.81   | 1.01   | 2.14   | 2.25   | 2.38   | -3.94  | 7.02   | 1.30   | 0.38   | 2.25   | -1.48  | -0.23  | 0.81   | -1.04  | 1.30   | 0.80   | 1.25   |
| 916 | 360 | 18 | R | -18.05 | -17.68 | -15.92 | -15.92 | -15.19 | -14.02 | -14.49 | -17.52 | -18.96 | -16.41 | 1.91   | -15.12 | -15.65 | -15.31 | -14.13 | -15.88 | -18.07 | -19.72 | -18.49 | -19.10 | -20.03 | -20.01 | -14.94 | -16.03 |
| 917 | 360 | 18 | G | 0.83   | 1.62   | 2.34   | 1.23   | 1.11   | 1.08   | 2.71   | 2.26   | 1.24   | 2.26   | 2.93   | -0.60  | 1.21   | 2.91   | 0.77   | 1.08   | 1.48   | 0.99   | 2.49   | 2.56   | 1.49   | 1.99   | 2.15   | 1.81   |
| 918 | 360 | 18 | B | 3.38   | 0.28   | 3.24   | 0.69   | 1.49   | 2.11   | 1.07   | 1.85   | 2.49   | 0.36   | 4.30   | -0.39  | 2.81   | 4.59   | 3.67   | 3.55   | 4.56   | 3.14   | 2.88   | 4.09   | 5.06   | 3.56   | 1.00   | 3.76   |
| 919 | 360 | 19 | R | -1.41  | 0.77   | 1.42   | -0.77  | -0.39  | -0.86  | 1.46   | 0.72   | -0.35  | -0.41  | -3.11  | -0.59  | -1.10  | -1.34  | -0.63  | -0.90  | 0.73   | -1.27  | -0.58  | 0.66   | -0.58  | 0.70   | -0.75  | 0.00   |
| 920 | 360 | 19 | G | -1.99  | -1.11  | 0.88   | -0.72  | 0.39   | -0.86  | -0.92  | -0.89  | -1.07  | 0.05   | -3.67  | -0.14  | -1.18  | 2.10   | -0.26  | -1.11  | -0.08  | -1.21  | 0.01   | -0.44  | -0.83  | -0.54  | -0.11  | -1.26  |
| 921 | 360 | 19 | B | 0.90   | 1.05   | 2.36   | -0.42  | 1.84   | 3.83   | 2.45   | 0.37   | 2.67   | 2.19   | 2.93   | -0.02  | 0.99   | 5.33   | 1.18   | 1.08   | 1.30   | 0.67   | 0.89   | 2.32   | 1.31   | 1.96   | -0.06  | 1.15   |
| 922 | 360 | 20 | R | -1.84  | -7.77  | 2.80   | -5.91  | -3.97  | 3.15   | -10.22 | -3.23  | -1.59  | -0.92  | -0.21  | -1.59  | -7.08  | 10.41  | 1.50   | 4.99   | 3.16   | 1.90   | 3.79   | -5.92  | -5.79  | 1.39   | -3.38  | -4.31  |
| 923 | 360 | 20 | G | -1.91  | -12.59 | 2.02   | -8.89  | -4.81  | 2.89   | -9.21  | -8.20  | -0.36  | -4.59  | 0.05   | -4.89  | -3.65  | 6.40   | 1.20   | 9.60   | 2.99   | 3.89   | 7.24   | -4.59  | -4.28  | 3.62   | -5.23  | -7.39  |
| 924 | 360 | 20 | B | -2.39  | -22.17 | 2.56   | -15.53 | -3.98  | -2.40  | -7.67  | -15.39 | 0.93   | -10.62 | 3.47   | -8.39  | -1.35  | 5.65   | 2.52   | 16.19  | 8.67   | 5.72   | 11.72  | -3.58  | -2.89  | 7.90   | -3.34  | -8.39  |
| 925 | 360 | 21 | R | 1.16   | -4.91  | 2.77   | 0.06   | -1.81  | -9.61  | -13.01 | 2.58   | 0.57   | -9.98  | -2.59  | 0.73   | -6.01  | -2.66  | 3.85   | 5.78   | 3.99   | 3.00   | 2.77   | 4.47   | 4.52   | 4.18   | 3.12   | 9.02   |
| 926 | 360 | 21 | G | 2.80   | -8.20  | 5.82   | -1.57  | -1.81  | -14.63 | -15.90 | 3.79   | -0.40  | -12.23 | -6.50  | 1.45   | -10.08 | -5.12  | 4.44   | 6.19   | 5.42   | 4.82   | 4.00   | 6.25   | 6.34   | 4.30   | 3.07   | 9.80   |
| 927 | 360 | 21 | B | 0.14   | -3.07  | 2.14   | -1.06  | -2.25  | -4.72  | -5.37  | 0.32   | -2.90  | -3.55  | -0.63  | -0.16  | -5.32  | -7.54  | -13.29 | -17.44 | -11.88 | -12.10 | -14.41 | -13.17 | -16.89 | -12.03 | -20.92 | -28.28 |
| 928 | 360 | 22 | R | 0.07   | -2.08  | 4.04   | 0.06   | -0.89  | -1.18  | -3.38  | 0.10   | 1.00   | -1.66  | 0.16   | -0.28  | -5.38  | -2.11  | 1.95   | 4.23   | 2.91   | 3.81   | 1.59   | 2.88   | 3.19   | 2.42   | 2.28   | 8.75   |
| 929 | 360 | 22 | G | 3.93   | 2.02   | 6.71   | -3.71  | -2.96  | -10.92 | -14.61 | -4.96  | 2.15   | -14.02 | 0.09   | -0.59  | -17.31 | -8.52  | 31.54  | 37.78  | 30.01  | 28.64  | 33.52  | 37.45  | 41.21  | 27.63  | 45.40  | 67.20  |
| 930 | 360 | 22 | B | -0.57  | 4.18   | 0.13   | 0.70   | 0.50   | 0.47   | 1.79   | -1.90  | 0.25   | -1.81  | 3.34   | 3.20   | -7.23  | 1.77   | -0.05  | -1.33  | 2.39   | 0.44   | -0.40  | 1.13   | 0.33   | -0.43  | 0.26   | -3.85  |
| 931 | 360 | 23 | R | -2.06  | 3.97   | -0.81  | 2.42   | 3.23   | 6.81   | 7.65   | 0.76   | 2.15   | 6.66   | 0.21   | 2.29   | 5.98   | 13.74  | -3.85  | -3.37  | -3.00  | -1.54  | -3.18  | -3.59  | -2.72  | -1.80  | -4.15  | -5.30  |
| 932 |     |    |   |        |        |        |        |        |        |        |        |        |        |        |        |        |        |        |        |        |        |        |        |        |        |        |        |

|      |     |    |   |        |        |        |        |        |        |        |        |        |        |        |        |        |        |        |        |        |        |        |        |        |        |        |        |
|------|-----|----|---|--------|--------|--------|--------|--------|--------|--------|--------|--------|--------|--------|--------|--------|--------|--------|--------|--------|--------|--------|--------|--------|--------|--------|--------|
| 994  | 390 | 8  | R | 3.71   | 4.95   | 9.26   | 6.24   | 4.74   | 5.51   | 9.08   | 4.88   | 5.97   | 4.97   | -0.05  | 3.48   | 5.85   | 10.44  | 1.90   | 4.07   | 6.14   | 5.31   | 4.65   | 4.30   | 2.94   | 5.11   | 3.48   | 4.07   |
| 995  | 390 | 8  | G | 3.80   | 6.42   | 5.68   | 3.84   | 4.10   | 6.61   | 10.81  | 3.88   | 5.59   | 8.38   | 1.92   | 1.83   | 8.63   | 16.32  | 1.48   | 0.47   | 0.78   | 0.66   | 1.28   | 1.17   | 1.44   | 0.83   | 0.87   | 0.86   |
| 996  | 390 | 8  | B | 3.53   | 2.03   | 3.71   | 2.36   | 3.49   | -1.27  | 0.68   | 2.74   | 4.29   | -1.96  | 1.82   | 0.66   | -0.64  | 9.13   | 4.10   | 2.12   | 3.87   | 0.94   | 4.50   | 2.29   | 3.08   | 2.75   | 5.24   | 4.56   |
| 997  | 390 | 9  | R | 1.97   | -1.74  | 7.60   | 2.73   | 3.44   | -6.40  | -4.52  | 2.07   | 3.68   | -2.05  | -16.74 | 0.70   | -0.74  | -0.32  | 20.47  | 18.74  | 19.98  | 17.50  | 17.93  | 19.32  | 16.14  | 18.27  | 25.37  | 24.01  |
| 998  | 390 | 9  | G | 6.48   | -4.34  | 10.76  | 3.89   | 1.18   | -14.99 | -9.22  | 7.19   | 6.99   | -7.14  | -20.81 | 2.39   | -10.95 | -5.10  | 33.82  | 32.87  | 33.68  | 32.81  | 30.83  | 34.40  | 32.27  | 34.08  | 27.66  | 40.93  |
| 999  | 390 | 9  | B | 3.60   | -3.10  | 3.44   | 2.26   | 0.99   | -4.46  | -8.29  | 2.26   | 2.59   | -4.60  | -27.88 | 1.97   | -7.86  | 2.30   | -10.93 | -12.31 | -10.02 | -13.29 | -11.95 | -13.46 | -9.84  | -12.14 | -13.16 | -13.66 |
| 1000 | 390 | 10 | R | -0.05  | -4.86  | 2.25   | 0.66   | -0.11  | -6.41  | -9.83  | 0.28   | 1.25   | -10.97 | 0.20   | 0.85   | -10.29 | 0.46   | 3.20   | 4.93   | 8.08   | 2.59   | 5.01   | 2.85   | 3.28   | 5.11   | 1.68   | 7.31   |
| 1001 | 390 | 10 | G | 0.75   | -6.97  | 3.06   | 0.14   | 0.27   | -7.10  | -14.50 | 1.10   | 2.88   | -11.39 | 1.28   | -0.23  | -13.89 | 0.77   | 9.79   | 10.13  | 12.48  | 8.30   | 9.10   | 8.92   | 9.78   | 10.31  | 6.18   | 15.49  |
| 1002 | 390 | 10 | B | -1.45  | -5.40  | 1.64   | 0.15   | 0.41   | -5.90  | -6.63  | 1.67   | -1.83  | -11.33 | 2.85   | 0.60   | -6.44  | -3.41  | -21.95 | -20.80 | -17.91 | -22.04 | -19.39 | -21.06 | -23.62 | -18.32 | -34.17 | -32.76 |
| 1003 | 390 | 11 | R | -1.08  | 0.03   | 6.36   | 1.98   | 1.80   | 1.14   | 1.60   | 0.40   | 2.05   | 0.61   | 5.04   | -2.15  | 1.97   | -0.98  | 0.32   | 0.78   | 1.63   | -0.81  | -0.08  | 0.53   | 0.84   | 0.44   | -0.14  | 0.63   |
| 1004 | 390 | 11 | G | -1.16  | -0.50  | 1.77   | -0.32  | -0.29  | 0.59   | -0.32  | -0.16  | -0.61  | -0.42  | 4.72   | -1.44  | -0.28  | 2.90   | -1.88  | -1.13  | -0.30  | -1.32  | 0.25   | -0.24  | -0.66  | -0.40  | -0.81  | 0.17   |
| 1005 | 390 | 11 | B | 1.62   | 2.15   | 2.67   | 0.94   | -0.15  | 2.91   | 2.28   | 0.10   | 0.22   | 2.22   | 2.77   | -0.30  | -0.11  | 0.88   | 0.14   | 0.61   | 3.29   | 1.95   | 2.85   | 4.07   | 0.62   | 2.14   | 2.30   | 1.96   |
| 1006 | 390 | 12 | R | -10.49 | 0.32   | -6.97  | 1.86   | 0.90   | 0.02   | 1.44   | 1.75   | -11.76 | 0.35   | 1.17   | -2.77  | -0.33  | 0.34   | -10.53 | -11.70 | -11.85 | -14.34 | -12.08 | -15.47 | -11.49 | -12.13 | 0.66   | 2.73   |
| 1007 | 390 | 12 | G | 0.23   | 1.34   | 3.44   | 1.70   | 0.49   | 1.57   | 1.70   | 1.54   | 1.72   | 0.96   | 1.41   | -0.47  | 2.19   | 1.42   | 0.00   | 1.06   | 1.88   | 1.03   | 2.41   | 1.57   | 1.58   | 1.41   | 0.61   | 0.90   |
| 1008 | 390 | 12 | B | 11.08  | 1.07   | 16.85  | 5.55   | 1.60   | 3.53   | 1.74   | 2.02   | 7.06   | 2.33   | 2.88   | 1.61   | 3.98   | 5.21   | 17.50  | 2.68   | 3.28   | 2.95   | 2.31   | 6.33   | 3.20   | 4.12   | 0.78   | 0.91   |
| 1009 | 390 | 13 | R | 1.90   | 2.91   | 4.74   | 3.26   | 3.37   | 5.07   | 3.99   | 2.35   | 4.07   | 2.73   | 0.73   | 2.14   | 3.24   | 8.28   | 1.92   | 2.25   | 2.62   | 1.50   | 1.28   | 0.96   | 0.60   | 1.51   | 1.51   | 0.40   |
| 1010 | 390 | 13 | G | 2.45   | 2.44   | 5.51   | 2.27   | 3.80   | 2.71   | 3.37   | 2.75   | 3.87   | 3.79   | -0.82  | 1.63   | 2.61   | 6.65   | 1.14   | 1.52   | 3.06   | 0.81   | 1.45   | 1.28   | 0.80   | 2.30   | 1.59   | 1.50   |
| 1011 | 390 | 13 | B | 1.68   | 1.50   | 4.77   | 2.32   | 0.61   | 2.58   | 3.79   | 1.28   | 2.06   | 1.57   | -0.03  | 0.84   | 3.93   | 1.73   | 0.64   | 1.38   | 1.51   | 0.87   | 1.30   | 1.52   | 1.51   | 2.13   | 0.17   | 0.81   |
| 1012 | 390 | 14 | R | 0.01   | -1.54  | 4.14   | 0.00   | 0.90   | -2.36  | -1.57  | 0.98   | 0.01   | -6.47  | 1.69   | -0.46  | -1.03  | -1.04  | 1.08   | -0.96  | -0.03  | 0.48   | -0.34  | -0.74  | -0.88  | -0.03  | -3.15  | -0.60  |
| 1013 | 390 | 14 | G | -0.61  | -0.04  | 2.81   | 1.12   | 0.88   | -0.06  | 3.61   | 0.79   | 1.66   | -0.90  | 1.32   | -1.28  | -1.36  | 0.68   | -2.48  | -3.00  | -0.72  | -2.70  | -0.85  | -0.79  | -2.19  | -2.19  | -2.62  | -3.50  |
| 1014 | 390 | 14 | B | -0.74  | 2.06   | 3.43   | 1.69   | 1.18   | 3.23   | 16.62  | 2.61   | 3.62   | 2.00   | 1.71   | 1.46   | 3.49   | 6.18   | 3.25   | 3.46   | 2.93   | 1.75   | 1.76   | 0.96   | 0.83   | 2.78   | 4.21   | 2.37   |
| 1015 | 390 | 15 | R | 2.98   | 1.99   | 2.88   | 2.69   | 3.36   | 1.60   | 6.36   | 3.35   | 3.76   | -0.09  | 1.22   | 2.67   | 6.20   | 2.53   | -2.42  | -2.36  | -2.45  | -4.45  | -2.72  | -2.11  | -4.95  | -2.47  | -6.02  | -5.69  |
| 1016 | 390 | 15 | G | 1.15   | 1.16   | 1.95   | 1.12   | 1.63   | 2.23   | 5.99   | 0.67   | 1.36   | 3.08   | 1.03   | -0.01  | 3.59   | 5.50   | 1.92   | 1.85   | 2.50   | 2.85   | 2.70   | 1.43   | 3.37   | 2.27   | 4.19   | 2.97   |
| 1017 | 390 | 15 | B | -0.43  | -0.81  | 0.97   | 0.18   | -0.26  | 2.93   | 2.70   | -1.00  | -1.56  | -2.20  | 0.04   | -1.06  | 0.07   | -1.64  | 0.23   | 0.61   | 1.60   | -0.68  | 0.54   | 0.54   | 0.22   | 0.66   | 2.06   | 0.82   |
| 1018 | 390 | 16 | R | 1.40   | -7.39  | 3.81   | 1.10   | -0.63  | -1.89  | -2.27  | -2.00  | -0.58  | -12.27 | 4.10   | 0.96   | -10.58 | -3.19  | 11.02  | 10.17  | 9.38   | 9.28   | 11.19  | 11.79  | 12.77  | 8.69   | 13.70  | 19.97  |
| 1019 | 390 | 16 | G | 0.92   | -3.69  | 2.33   | 0.19   | 1.18   | 1.25   | -2.57  | -1.39  | 1.91   | -11.93 | 0.84   | 1.28   | -13.14 | -2.16  | 13.43  | 12.11  | 10.06  | 12.72  | 13.89  | 14.28  | 15.68  | 9.68   | 9.88   | 21.59  |
| 1020 | 390 | 16 | B | 1.63   | -8.09  | -0.05  | 0.61   | -0.87  | -4.23  | -4.28  | -1.18  | -2.99  | -14.67 | -0.61  | 2.34   | -11.08 | -4.98  | -28.16 | -33.15 | -26.79 | -28.11 | -30.56 | -31.86 | -32.83 | -27.74 | -44.14 | -46.17 |
| 1021 | 390 | 17 | R | 1.19   | 2.56   | 7.96   | 4.64   | 3.41   | 3.17   | 5.51   | 4.44   | 3.72   | 2.62   | 0.94   | 0.97   | 6.92   | 5.52   | -11.42 | -15.32 | -10.41 | -10.98 | -10.01 | -12.77 | -12.94 | -7.72  | -15.54 | -21.99 |
| 1022 | 390 | 17 | G | 2.42   | 4.75   | 6.49   | 7.52   | 8.22   | 8.21   | 11.46  | 8.45   | 3.96   | 5.99   | 4.52   | 6.47   | 8.98   | 13.50  | -15.09 | -27.07 | -15.17 | -14.89 | -15.14 | -17.77 | -23.05 | -15.25 | -24.62 | -36.58 |
| 1023 | 390 | 17 | B | 0.98   | -1.46  | 2.75   | 3.46   | 1.59   | -0.58  | 2.08   | 2.20   | 3.59   | 2.45   | 3.17   | 2.36   | -4.46  | 7.57   | 0.45   | 0.57   | 1.89   | -1.41  | -2.15  | -0.55  | -2.08  | 1.14   | -0.75  | -0.85  |
| 1024 | 390 | 18 | R | -19.97 | -19.36 | -17.33 | -17.08 | -16.54 | -17.27 | -18.39 | -17.76 | -19.71 | -18.90 | 0.23   | -17.49 | -16.25 | -16.59 | -15.89 | -18.02 | -19.15 | -21.34 | -20.30 | -20.50 | -20.66 | -21.56 | -16.26 | -16.68 |
| 1025 | 390 | 18 | G | 1.26   | 1.61   | 2.92   | 1.46   | 1.40   | 1.19   | 2.66   | 2.26   | 1.38   | 0.88   | 3.25   | -0.77  | 1.00   | 3.65   | 0.74   | 1.20   | 1.83   | 1.14   | 2.20   | 2.21   | 1.61   | 1.61   | 1.74   | 1.97   |
| 1026 | 390 | 18 | B | 3.59   | 1.59   | 2.73   | 1.05   | 0.40   | 1.88   | 0.27   | 3.29   | 2.95   | 0.29   | 3.36   | -1.14  | 3.26   | 4.41   | 3.17   | 3.38   | 4.30   | 3.30   | 4.38   | 5.71   | 4.21   | 3.50   | 2.16   | 5.95   |
| 1027 | 390 | 19 | R | -1.24  | 0.40   | 3.35   | -0.37  | -0.95  | -0.27  | 1.08   | 0.52   | -0.45  | -1.91  | -4.64  | -1.07  | -1.69  | 0.13   | 0.34   | -1.42  | -0.30  | -1.54  | -0.49  | -0.26  | -0.66  | 0.06   | -0.88  | 0.80   |
| 1028 | 390 | 19 | G | -2.71  | -0.94  | 0.68   | -0.27  | -0.57  | -1.69  | -1.39  | -1.21  | -0.46  | -0.81  | -5.00  | -1.46  | -1.23  | 2.62   | -0.70  | -1.05  | 0.31   | -0.86  | -0.17  | -0.44  | -0.91  | -0.37  | -0.01  | 0.08   |
| 1029 | 390 | 19 | B | 1.85   | 0.26   | 1.19   | -0.30  | 1.96   | 3.44   | 2.45   | 0.12   | 2.70   | 1.10   | 3.96   | 0.82   | 1.01   | 6.16   | 1.00   | 1.05   | 0.90   | 0.06   | 0.92   | 1.04   | 1.12   | 0.89   | 0.99   | 1.60   |
| 1030 | 390 | 20 | R | -1.38  | -6.23  | 2.53   | -7.14  | -4.04  | 3.41   | -2.10  | -4.62  | -1.30  | -2.77  | 0.11   | -3.56  | -7.32  | 11.08  | 0.98   | 4.20   | 1.89   | 0.13   | 3.37   | 0.23   | -4.23  | 1.25   | -10.60 | -4.56  |
| 1031 | 390 | 20 | G | -2.88  | -11.02 | 3.10   | -10.38 | -2.67  | 3.05   | -9.52  | -8.50  | -0.84  | -5.56  | -0.30  | -6.37  | -4.03  | 7.45   | 2.78   | 10.23  | 3.81   | 1.72   | 7.21   | 0.99   | -4.02  | 3.17   | -14.86 | -6.01  |
| 1032 | 390 | 20 | B | -2.59  | -20.09 | 3.29   | -10.71 | -3.03  | -1.05  | -16.28 | -16.97 | 1.24   | -11.16 | 5.12   | -8.63  | -1.79  | 5.89   | 3.59   | 16.59  | 5.72   | 3.92   | 11.73  | 3.37   | -2.71  | 8.67   | -17.29 | -8.90  |
| 1033 | 390 | 21 | R | 1.49   | -5.81  | 3.98   | -0.22  | -2.17  | -9.81  | -12.72 | 3.32   | 0.65   | -10.69 | -2.63  | 0.24   | -6.67  | -2.81  | 4.09   | 6.85   | 5.41   | 3.79   | 4.19   | 6.57   | 5.26   | 6.63   | 3.53   | 10.62  |
| 1034 | 390 | 21 | G | 3.00   | -8.35  | 6.74   | -1.15  | -1.03  | -14.79 | -17.08 | 4.43   | -0.10  | -12.79 | -6.49  | 0.72   | -9.85  | -4.84  | 5.63   | 7.77   | 6.61   | 5.73   | 4.96   | 7.31   | 7.41   | 5.33   | 4.19   | 11.21  |
| 1035 | 390 | 21 | B | 0.19   | -3.15  | 2.12   | -0.22  | -1.77  | -5.10  | -5.20  | -1.29  | -1.26  | -4.81  | -0.63  | -0.71  | -4.36  | -7.23  | -17.15 | -22.27 | -15.09 | -15.48 | -17.41 | -16.58 | -19.08 | -15.08 | -23.29 | -31.98 |
| 1036 | 390 | 22 | R | 0.80   | -3.42  | 4.60   | 0.09   | 0.22   | -2.72  | -3.26  | 1.55   | 1.36   | -3.44  | -1.23  | -1.26  | -5.99  | -1.26  | 1.96   | 7.10   | 3.33   | 4.16   | 2.16   | 3.09   | 4.13   | 4.29   | 2.71   | 8.37   |
| 1037 | 390 | 22 | G | 4.17   | 0.14   | 6.12   | -3.69  | -2.01  | -10.57 | -17.53 | -5.33  | 2.35   | -14.53 | 0.29   | -1.86  | -18.01 | -6.92  | 43.82  | 57.18  | 43.60  | 40.94  | 47.48  | 46.88  | 55.23  | 42.68  | 56.93  | 77.06  |
| 1038 | 390 | 22 | B | -0.13  | 2.23   | 0.08   | 0.81   | 1.16   | 0.64   | 2.01   | -1.98  | 0.25   | -3.65  | 2.70   | 2.43   | -7.96  | 2.91   | -1.79  | -3.82  | 0.77   | 0.72   | -1.63  | -2.52  | -0.14  | 1.51   | 0.88   | -2.65  |
| 1039 | 390 | 23 | R | -2.03  | 3.96   | -0.63  | 2.19   | 2.14   | 7.57   | 7.53   | 0.28   | 2.11   | 7.25   | 0.93   | 3.66   | 6.81   | 14.32  | -4.34  | -3.83  | -5.04  | -2.36  | -4.87  | -3.79  | -4.22  | -3.32  | -5.02  | -6.84  |
| 1040 | 390 | 23 | G | -0.55  | 3.67   | 0.49   | 2.26   | 3.77   | 6.20   | 6.21   | 2.49   | 1.24   | 6.43   | -0.12  | 0.42   | 5.40   | 8.80   | -4.83  | -7.29  | -4.60  | -4.43  | -5.32  | -5.47  | -6.89  | -3.82  | -7.85  | -9.58  |
| 1041 | 390 | 23 | B | 0.89   | 1.70   | 6.46   | 2.05   | 2.29   | 2.97   | 4.39   | -0.94  | 3.59   | 4.11   | 0.75   | 0.73   | 2.18   | 4.72   | 1.73   | -3.75  | -2.78  | -2.83  | -4.19  | -2.79  | -2.70  | -2.45  | -3.57  | -3.90  |
| 1042 | 390 | 24 | R | 2.01   | 0.83   | 4.49   | 2.40   | 1.85   | -4.94  | -1.87  | 3.16   | 2.58   | -0.79  | -3.40  | 0.47   | 0.23   | -1.81  | 2.61   |        |        |        |        |        |        |        |        |        |

|      |     |    |   |        |        |        |        |        |        |        |        |        |        |        |        |        |        |        |        |        |        |        |        |        |        |        |        |
|------|-----|----|---|--------|--------|--------|--------|--------|--------|--------|--------|--------|--------|--------|--------|--------|--------|--------|--------|--------|--------|--------|--------|--------|--------|--------|--------|
| 1105 | 420 | 9  | R | 2.40   | -1.52  | 7.63   | 2.69   | 2.03   | -7.38  | -3.67  | 2.15   | 3.71   | -0.92  | -15.90 | 0.22   | -4.73  | -1.28  | 22.24  | 19.65  | 21.47  | 18.03  | 19.05  | 21.99  | 16.97  | 20.90  | 14.83  | 24.06  |
| 1106 | 420 | 9  | G | 6.19   | -4.69  | 11.58  | 4.32   | 1.19   | -16.13 | -9.10  | 6.75   | 7.80   | -5.67  | -22.26 | 3.19   | -10.54 | -5.33  | 37.68  | 33.93  | 37.72  | 35.91  | 36.03  | 37.43  | 32.84  | 37.81  | 30.05  | 41.27  |
| 1107 | 420 | 9  | B | 3.16   | -2.79  | 3.39   | 2.36   | -0.28  | -6.35  | -7.26  | 3.88   | 1.69   | -3.74  | -29.50 | 2.31   | -7.54  | 1.61   | -12.97 | -14.51 | -11.83 | -15.29 | -14.75 | -13.89 | -9.78  | -13.51 | -13.65 | -13.35 |
| 1108 | 420 | 10 | R | -0.70  | -5.56  | 2.30   | 0.68   | -0.49  | -6.57  | -10.50 | -0.15  | 1.02   | -10.10 | 0.91   | 0.81   | -10.09 | 0.24   | 5.04   | 5.21   | 6.44   | 3.86   | 4.72   | 3.90   | 5.48   | 6.21   | 3.76   | 6.39   |
| 1109 | 420 | 10 | B | 0.76   | -7.45  | 2.93   | 0.13   | 0.34   | -7.74  | -15.11 | 1.50   | 2.58   | -10.93 | 0.51   | 0.04   | -13.85 | -1.01  | 12.37  | 10.69  | 12.25  | 10.74  | 11.27  | 11.45  | 10.36  | 13.26  | 7.75   | 16.54  |
| 1110 | 420 | 10 | G | -1.28  | -4.62  | 3.25   | -0.07  | 1.34   | -7.83  | -7.19  | 1.73   | -1.91  | -10.36 | 0.52   | 0.93   | -7.11  | -3.04  | -25.54 | -24.90 | -25.74 | -25.85 | -24.90 | -24.17 | -24.29 | -24.55 | -37.25 | -34.59 |
| 1111 | 420 | 11 | R | -1.41  | 0.76   | 5.86   | 2.06   | 1.49   | -0.56  | 2.55   | 0.44   | 2.32   | 3.96   | 6.54   | -2.48  | 2.18   | -0.98  | 0.20   | 0.59   | 0.51   | -1.20  | 0.51   | -0.79  | 0.67   | 0.20   | -0.25  | 1.14   |
| 1112 | 420 | 11 | G | -0.87  | -0.51  | 1.69   | -0.56  | -0.51  | -0.32  | 0.70   | -0.45  | -0.92  | 1.17   | 4.95   | -1.74  | 0.48   | 3.21   | -1.50  | -1.17  | 0.43   | -0.72  | -0.13  | -0.50  | -0.83  | -0.73  | -0.90  | 0.99   |
| 1113 | 420 | 11 | B | 1.65   | 2.78   | 1.08   | 0.69   | -0.30  | 2.29   | 2.20   | -0.02  | 1.45   | 2.79   | 2.32   | -0.26  | 1.32   | 0.63   | -0.11  | 0.69   | 0.65   | 0.35   | 0.19   | 0.65   | 1.07   | 1.10   | 2.76   | 1.38   |
| 1114 | 420 | 12 | R | -12.61 | 0.08   | -6.76  | 1.37   | 0.18   | -0.81  | 2.93   | 2.53   | -13.46 | 3.10   | 1.18   | -1.89  | 0.06   | 0.07   | -10.21 | -12.33 | -11.84 | -13.79 | -12.15 | -16.08 | -12.26 | -12.08 | 0.45   | 1.72   |
| 1115 | 420 | 12 | G | 1.29   | 1.44   | 3.70   | 2.00   | 0.27   | 1.93   | 2.29   | 0.43   | 1.85   | 3.80   | 1.61   | -0.08  | 2.66   | 1.40   | -0.24  | 1.32   | 1.68   | 2.21   | 2.43   | 1.59   | 1.34   | 1.43   | 1.10   | 1.67   |
| 1116 | 420 | 12 | B | 11.17  | 0.51   | 16.78  | 4.83   | 1.88   | 2.96   | 2.96   | 2.40   | 7.73   | 2.27   | 3.48   | 2.33   | 4.19   | 6.20   | 17.65  | 1.86   | 3.25   | 4.24   | 2.62   | 6.38   | 3.81   | 3.17   | 1.27   | 0.94   |
| 1117 | 420 | 13 | R | 2.19   | 3.61   | 5.63   | 4.27   | 4.17   | 4.60   | 3.90   | 3.36   | 4.96   | 4.65   | 1.26   | 1.64   | 3.01   | 9.80   | 1.59   | 1.14   | 2.58   | 0.57   | 1.26   | 1.32   | 0.75   | 1.03   | 1.25   | 0.95   |
| 1118 | 420 | 13 | G | 2.50   | 2.65   | 5.55   | 2.66   | 4.10   | 2.07   | 4.81   | 2.36   | 3.04   | 5.24   | -1.03  | 1.81   | 3.76   | 5.56   | 0.55   | 1.64   | 2.42   | 1.77   | 1.35   | 0.82   | 0.83   | 2.63   | 1.56   | 1.65   |
| 1119 | 420 | 13 | B | 2.22   | 2.20   | 4.84   | 3.70   | 2.25   | 1.24   | 3.72   | 1.88   | 3.32   | 3.82   | -0.25  | 1.19   | 3.44   | 1.79   | 0.97   | 0.93   | 1.45   | 0.13   | 1.25   | 2.18   | 1.27   | 0.68   | 0.28   | 1.45   |
| 1120 | 420 | 14 | R | 0.15   | -1.52  | 3.12   | -0.28  | 0.04   | -2.46  | -4.12  | 0.01   | 0.90   | -4.13  | 1.72   | -0.52  | -0.03  | -0.96  | 0.41   | -1.83  | -0.12  | 0.82   | -0.90  | -1.13  | -1.31  | 0.35   | -3.08  | -0.76  |
| 1121 | 420 | 14 | G | 0.01   | 0.74   | 3.89   | 1.16   | 1.44   | -0.26  | -0.81  | 0.62   | 2.34   | 1.57   | 1.31   | -1.08  | -0.74  | 0.79   | -3.54  | -3.07  | -1.18  | -2.68  | -1.66  | -1.18  | -2.58  | -1.73  | -2.21  | -3.34  |
| 1122 | 420 | 14 | B | 0.26   | 2.63   | 2.85   | 1.38   | 1.59   | 4.04   | 3.73   | 0.55   | 4.34   | 4.19   | 1.95   | 1.21   | 4.85   | 8.92   | 2.36   | 3.04   | 2.65   | 2.01   | 1.08   | 2.10   | 1.59   | 2.93   | 5.37   | 3.55   |
| 1123 | 420 | 15 | R | 2.21   | 3.26   | 8.19   | 3.09   | 3.21   | -1.67  | 7.35   | 2.65   | 4.15   | 1.52   | 0.75   | 2.31   | 6.18   | 2.74   | -4.35  | -4.13  | -3.42  | -5.64  | -2.87  | -2.23  | -4.15  | -3.41  | -5.73  | -5.50  |
| 1124 | 420 | 15 | G | 1.45   | 1.56   | 2.00   | 1.52   | 2.90   | 2.40   | 7.30   | -0.22  | 1.19   | 4.57   | 2.02   | -0.47  | 4.53   | 5.89   | 2.36   | 1.83   | 2.90   | 2.96   | 2.40   | 1.73   | 2.89   | 2.34   | 4.16   | 2.91   |
| 1125 | 420 | 15 | B | -1.01  | -0.31  | 1.94   | 0.53   | -4.16  | -3.98  | 1.66   | -1.38  | -0.79  | -1.39  | 0.22   | 0.13   | 1.30   | -0.11  | 0.50   | 2.08   | -0.44  | 1.72   | 0.47   | 0.94   | 1.73   | 1.40   | -0.62  |        |
| 1126 | 420 | 16 | R | 1.05   | -8.36  | 3.84   | 0.92   | 0.38   | -3.44  | -4.12  | -1.92  | -0.35  | -10.30 | 4.32   | 1.34   | -10.51 | -5.86  | 15.41  | 13.65  | 14.29  | 13.51  | 16.31  | 15.49  | 14.78  | 13.47  | 17.30  | 22.29  |
| 1127 | 420 | 16 | G | 1.19   | -4.01  | 1.76   | 0.95   | 0.68   | -0.08  | -3.54  | -1.86  | 1.59   | -11.90 | 0.93   | 0.66   | -13.13 | -3.15  | 17.84  | 14.17  | 14.64  | 16.08  | 17.69  | 17.26  | 19.28  | 13.90  | 13.50  | 23.74  |
| 1128 | 420 | 16 | B | -0.06  | -9.31  | -0.02  | 0.52   | -0.81  | -5.89  | -4.57  | -1.00  | -2.25  | -13.30 | -0.18  | 2.21   | -11.43 | -6.70  | -34.48 | -37.70 | -35.88 | -34.25 | -36.38 | -37.74 | -37.94 | -36.79 | -50.69 | -44.19 |
| 1129 | 420 | 17 | R | 1.77   | 1.66   | 8.61   | 4.30   | 2.88   | 2.01   | 6.38   | 4.74   | 4.39   | 4.14   | 0.85   | 1.31   | 7.57   | 6.00   | -12.85 | -19.22 | -12.89 | -13.33 | -14.27 | -15.09 | -16.10 | -12.90 | -18.03 | -22.41 |
| 1130 | 420 | 17 | G | 2.96   | 4.91   | 6.68   | 8.30   | 8.24   | 7.47   | 11.46  | 8.78   | 4.41   | 7.67   | 5.59   | 7.10   | 9.17   | 14.75  | -18.74 | -32.29 | -20.52 | -19.39 | -20.44 | -19.82 | -26.40 | -20.66 | -29.39 | -37.34 |
| 1131 | 420 | 17 | B | 1.69   | 0.30   | 3.65   | 4.35   | 1.82   | -0.52  | 3.59   | 1.80   | 3.53   | 2.72   | 3.18   | 2.26   | -5.34  | 7.26   | -0.85  | 0.23   | 0.71   | -4.16  | -3.56  | -1.05  | -1.96  | 0.17   | -2.49  | -0.82  |
| 1132 | 420 | 18 | R | -20.78 | -21.21 | -18.48 | -18.16 | -19.36 | -19.30 | -17.69 | -19.91 | -22.69 | -18.04 | 0.49   | -18.01 | -17.27 | -18.57 | -18.28 | -19.87 | -20.20 | -22.94 | -21.64 | -22.42 | -23.87 | -23.92 | -17.50 | -17.97 |
| 1133 | 420 | 18 | G | 1.39   | 1.65   | 3.49   | 1.26   | 2.41   | 0.54   | 3.03   | 2.08   | 2.05   | 3.00   | 3.94   | -1.72  | 1.43   | 3.68   | 1.67   | 1.33   | 1.21   | 1.36   | 2.13   | 2.45   | 2.16   | 2.46   | 1.94   | 1.89   |
| 1134 | 420 | 18 | B | 3.52   | 1.09   | 3.06   | 1.03   | 1.16   | 1.63   | 0.82   | 3.02   | 2.44   | 1.38   | 4.07   | 0.70   | 3.03   | 5.23   | 3.75   | 3.43   | 5.22   | 3.10   | 4.81   | 5.59   | 6.03   | 4.48   | 2.24   | 5.63   |
| 1135 | 420 | 19 | R | -1.32  | -0.42  | 2.24   | -0.96  | -0.17  | -2.99  | 1.46   | -0.53  | -0.64  | 0.71   | -5.31  | -2.42  | -0.58  | -1.26  | -0.12  | -0.94  | -0.56  | -1.23  | 0.33   | -0.35  | -0.91  | 1.22   | -0.96  | -0.02  |
| 1136 | 420 | 19 | G | -2.32  | -0.45  | 1.39   | -0.23  | -0.62  | -2.17  | -0.59  | -1.52  | -0.76  | 0.61   | -5.23  | -0.66  | -0.78  | 2.14   | -0.37  | -1.26  | 0.06   | -1.12  | 0.12   | -0.36  | -0.48  | -0.53  | -0.10  | 0.44   |
| 1137 | 420 | 19 | B | 1.21   | 0.53   | 1.59   | -0.14  | 1.71   | 2.16   | 2.42   | 0.48   | 2.62   | 2.30   | 4.14   | 1.48   | 1.37   | 6.25   | 1.52   | 1.70   | 0.67   | 1.24   | 1.20   | 1.35   | 1.79   | 1.66   | 1.79   | 1.66   |
| 1138 | 420 | 20 | R | -1.06  | -6.13  | 3.15   | -7.31  | -5.75  | 2.68   | 0.98   | -6.13  | -1.07  | -10.72 | 0.09   | -4.08  | -5.35  | 10.94  | 5.54   | 3.80   | 1.99   | -0.37  | 3.52   | 0.54   | -4.76  | 1.06   | -8.41  | -4.47  |
| 1139 | 420 | 20 | G | -1.75  | -11.14 | 3.09   | -10.51 | -5.11  | 1.34   | -7.11  | -9.90  | -0.30  | -12.25 | -0.42  | -7.21  | -2.12  | 7.28   | 6.10   | 9.41   | 3.60   | 1.03   | 6.79   | 1.83   | -4.56  | 3.50   | -12.73 | -5.99  |
| 1140 | 420 | 20 | B | -1.96  | -20.57 | 3.00   | -18.91 | -6.98  | -3.08  | -12.74 | -18.90 | 0.34   | -15.07 | 4.74   | -10.04 | 0.53   | 8.38   | 6.52   | 16.02  | 7.01   | 3.64   | 12.02  | 3.08   | -3.31  | 7.40   | -15.87 | -8.67  |
| 1141 | 420 | 21 | R | 1.77   | -5.90  | 4.62   | -1.19  | -1.88  | -10.81 | -12.63 | 2.02   | 1.68   | -10.17 | -3.65  | 0.95   | -5.54  | -3.07  | 4.68   | 7.08   | 6.37   | 4.24   | 4.69   | 6.44   | 5.55   | 6.94   | 4.59   | 9.78   |
| 1142 | 420 | 21 | G | 3.71   | -8.64  | 6.88   | -0.02  | -0.83  | -15.18 | -17.43 | 3.12   | 0.36   | -12.96 | -6.13  | 0.73   | -9.51  | -5.48  | 7.04   | 9.09   | 7.68   | 6.58   | 5.69   | 8.03   | 7.98   | 6.81   | 3.94   | 10.92  |
| 1143 | 420 | 21 | B | 0.59   | -2.18  | 2.34   | -0.77  | -2.73  | -5.42  | -5.05  | -1.13  | -1.83  | -3.07  | -1.06  | -0.63  | -4.11  | -6.34  | -20.82 | -24.55 | -18.53 | -18.57 | -20.21 | -18.47 | -20.31 | -17.90 | -25.70 | -30.36 |
| 1144 | 420 | 22 | R | 0.43   | -2.61  | 2.87   | 1.24   | -1.59  | -3.66  | -3.00  | -0.35  | -0.06  | -1.07  | 0.42   | -0.72  | -6.85  | -4.50  | 2.97   | 5.55   | 3.61   | 4.78   | 2.81   | 3.41   | 3.58   | 4.61   | 3.72   | 8.56   |
| 1145 | 420 | 22 | G | 3.79   | -4.43  | 7.22   | -2.43  | -2.71  | -10.93 | -19.11 | -4.20  | 2.46   | -20.98 | -0.44  | -4.67  | -18.11 | -14.99 | 50.01  | 64.57  | 52.59  | 48.10  | 52.44  | 49.32  | 57.60  | 49.82  | 59.36  | 77.77  |
| 1146 | 420 | 22 | B | 1.08   | -0.05  | 0.33   | 1.90   | 0.76   | -0.11  | 1.29   | 0.49   | 0.96   | -5.26  | 5.20   | 0.29   | -8.42  | -0.68  | -1.06  | -3.62  | 1.33   | 1.23   | -2.55  | -2.62  | 0.84   | -0.68  | 0.42   | -2.94  |
| 1147 | 420 | 23 | R | -1.12  | 4.97   | 0.32   | 2.75   | 2.44   | 6.97   | 7.29   | 0.58   | 1.78   | 7.88   | -0.05  | 2.61   | 7.13   | 16.00  | -5.37  | -3.06  | -5.49  | -3.27  | -5.95  | -4.49  | -5.02  | -3.68  | -6.53  | -7.43  |
| 1148 | 420 | 23 | G | -0.58  | 4.51   | 0.49   | 2.12   | 3.86   | 5.21   | 7.37   | 1.01   | 1.42   | 7.39   | 0.07   | 1.08   | 6.21   | 9.13   | -5.92  | -8.54  | -6.73  | -5.43  | -6.82  | -6.66  | -7.87  | -5.95  | -8.85  | -10.17 |
| 1149 | 420 | 23 | B | 2.41   | 1.40   | 6.82   | 1.91   | 2.54   | 1.62   | 3.59   | 0.47   | 2.48   | 5.47   | 0.66   | 0.69   | 2.51   | 6.15   | 1.23   | -4.44  | -2.20  | -4.32  | -5.33  | -3.34  | -1.84  | -2.56  | -3.00  | -4.61  |
| 1150 | 420 | 24 | R | 1.86   | 0.65   | 3.05   | 2.97   | 2.79   | -5.52  | -1.11  | 3.10   | 2.38   | 2.01   | -3.28  | 0.49   | 0.63   | -3.45  | 2.15   | 2.32   | 3.00   | 4.61   | 8.29   | 4.60   | 2.74   | 5.28   | 4.20   | 9.42   |
| 1151 | 420 | 24 | G | 5.74   | 2.82   | 6.18   | 6.23   | 3.32   | -8.62  | -3.70  | 7.36   | 6.34   | 2.14   | 4.60   | 4.36   | -0.01  | -4.23  | 6.22   | 2.84   | 9.56   | 14.79  | 20.17  | 10.06  | 8.38   | 11.59  | 7.03   | 7.10   |
| 1152 | 420 | 24 | B | 1.64   | -2.61  | 1.81   | 1.61   | 0.19   | -6.89  | -5.25  | 4.82   | -1.36  | -0.84  | 7.80   | 1.12   | -6.28  | -1.55  | -1.63  | -1.54  | -0.94  | -2.32  | -3.37  | -1.01  | -0.34  | -2.38  | -3.72  | -4.17  |
| 1153 | 420 | 25 | R | 0.97   | -0.29  | 1.99   | 0.37   | 0.31   | 0.28   | 2.47   | 1.53   | 0.41   | 1.95   | -16.16 | -0.34  | 1.03   |        |        |        |        |        |        |        |        |        |        |        |

|      |     |    |   |        |        |        |        |        |        |        |        |        |        |        |        |        |        |        |        |        |        |        |        |        |        |        |        |
|------|-----|----|---|--------|--------|--------|--------|--------|--------|--------|--------|--------|--------|--------|--------|--------|--------|--------|--------|--------|--------|--------|--------|--------|--------|--------|--------|
| 1216 | 450 | 10 | R | 0.13   | -6.21  | 2.88   | 1.37   | -0.11  | -7.30  | -11.63 | 0.76   | 1.01   | -12.31 | 3.07   | 1.24   | -10.35 | -0.76  | 5.24   | 4.76   | 9.50   | 4.12   | 5.63   | 4.26   | 4.28   | 6.58   | 4.15   | 6.88   |
| 1217 | 450 | 10 | G | 0.27   | -7.32  | 4.08   | 0.14   | 0.54   | -7.83  | -15.72 | 1.64   | 2.02   | -13.07 | 2.22   | 0.89   | -13.89 | -1.08  | 13.06  | 12.26  | 16.47  | 11.18  | 11.95  | 12.09  | 10.97  | 14.39  | 8.63   | 15.33  |
| 1218 | 450 | 10 | B | -1.12  | -5.62  | 1.74   | 1.02   | 1.14   | -6.07  | -8.51  | 2.28   | -0.94  | -12.02 | 3.18   | -0.24  | -7.06  | -3.39  | -27.24 | -24.37 | -25.71 | -27.90 | -26.33 | -25.37 | -25.26 | -26.46 | -39.06 | -32.64 |
| 1219 | 450 | 11 | R | -1.83  | 1.36   | 4.82   | 0.48   | -0.22  | -0.66  | 2.63   | 1.23   | 1.74   | 0.73   | 8.27   | -1.08  | 1.84   | -0.94  | 0.99   | 0.17   | 0.89   | -1.60  | 0.85   | 0.22   | 0.11   | 0.99   | 0.26   | 0.27   |
| 1220 | 450 | 11 | G | -0.78  | -0.95  | 1.68   | 0.07   | -0.19  | -0.64  | -0.03  | 0.08   | 0.12   | -0.62  | 5.62   | -0.61  | -0.57  | 2.88   | -2.25  | -1.33  | 0.37   | -1.09  | -0.91  | -0.26  | -0.36  | -0.13  | -0.61  | -0.01  |
| 1221 | 450 | 11 | B | 2.00   | 3.04   | 9.22   | 0.56   | -0.16  | 2.16   | 1.02   | 0.47   | 0.79   | 1.94   | 2.50   | -1.12  | 0.98   | 0.48   | 0.51   | 0.59   | 0.52   | 1.44   | 3.20   | 1.19   | 1.18   | 2.16   | 1.99   | 1.35   |
| 1222 | 450 | 12 | R | -12.68 | -0.17  | -7.30  | 1.79   | 0.90   | -1.27  | 1.77   | 3.57   | -13.66 | -0.45  | 4.37   | -2.53  | 0.63   | 0.13   | -10.08 | -12.10 | -11.96 | -14.63 | -12.27 | -17.05 | -13.54 | -11.90 | 1.48   | 2.15   |
| 1223 | 450 | 12 | G | 0.97   | 2.29   | 3.07   | 2.24   | 1.08   | 1.30   | 2.10   | 1.70   | 2.39   | 1.59   | 2.55   | 0.58   | 2.53   | 1.24   | -0.05  | 1.86   | 1.61   | 1.43   | 2.18   | 2.00   | 2.13   | 1.71   | 1.02   | 1.15   |
| 1224 | 450 | 12 | B | 11.55  | 0.20   | 18.56  | 5.08   | 3.30   | 3.56   | 3.43   | 4.01   | 7.79   | 2.54   | 2.39   | 2.03   | 3.12   | 5.68   | 18.59  | 2.47   | 4.23   | 4.30   | 5.73   | 8.12   | 3.86   | 3.70   | 0.61   | 1.89   |
| 1225 | 450 | 13 | R | 1.42   | 3.63   | 4.68   | 4.34   | 4.14   | 3.98   | 4.37   | 4.06   | 5.08   | 3.72   | 1.31   | 1.75   | 4.24   | 9.84   | 1.68   | 1.10   | 2.89   | 0.83   | 1.54   | 1.30   | 0.49   | 2.16   | 1.05   | 0.81   |
| 1226 | 450 | 13 | G | 2.85   | 3.68   | 5.47   | 2.88   | 4.13   | 3.49   | 3.72   | 2.23   | 3.91   | 4.08   | -3.38  | 2.63   | 3.06   | 6.21   | 0.32   | 2.03   | 2.58   | 0.84   | 1.45   | 1.27   | 1.12   | 3.10   | 2.05   | 1.29   |
| 1227 | 450 | 13 | B | -2.18  | 1.64   | 4.86   | 1.83   | 3.66   | 2.35   | 3.78   | 2.13   | 2.79   | 3.42   | 0.64   | 0.35   | 4.34   | 1.97   | -0.14  | 0.15   | 0.24   | 1.32   | 1.29   | 1.68   | 2.05   | 1.42   | 0.52   | 1.36   |
| 1228 | 450 | 14 | R | -0.78  | -1.09  | 3.42   | 0.09   | 0.39   | -3.08  | -4.20  | 0.85   | 0.54   | -7.34  | 4.51   | 0.02   | 0.19   | -1.96  | 0.72   | -1.94  | -0.37  | 0.59   | -0.65  | -0.99  | -1.37  | -0.23  | -2.51  | -0.50  |
| 1229 | 450 | 14 | G | -0.46  | 0.75   | 3.79   | 0.89   | 1.31   | -0.27  | -0.48  | 1.61   | 2.49   | -0.35  | 3.03   | 0.10   | -0.60  | 0.74   | -3.95  | -3.30  | -1.04  | -3.18  | -0.64  | -0.85  | -2.56  | -1.49  | -2.39  | -2.70  |
| 1230 | 450 | 14 | B | -1.37  | 1.94   | 2.80   | 1.67   | 1.93   | 3.73   | 3.77   | 1.16   | 3.84   | 4.41   | 0.06   | 0.98   | 3.29   | 8.36   | 3.87   | 2.70   | 3.23   | 2.14   | 1.61   | 2.17   | 1.34   | 1.17   | 4.83   | 3.24   |
| 1231 | 450 | 15 | R | 2.57   | 3.67   | 7.88   | 4.59   | 2.94   | 1.07   | 5.66   | 3.86   | 3.59   | 0.28   | 2.09   | 3.18   | 6.18   | 3.53   | -4.60  | -4.31  | -3.86  | -5.31  | -3.16  | -2.36  | -4.59  | -3.14  | -4.67  | -5.12  |
| 1232 | 450 | 15 | G | 0.97   | 1.29   | 1.81   | 0.61   | 1.65   | 0.88   | 6.62   | 1.00   | 1.41   | 3.50   | 2.46   | 0.53   | 4.33   | 4.58   | 2.10   | 1.66   | 3.12   | 2.68   | 2.54   | 1.48   | 3.60   | 3.21   | 4.12   | 3.33   |
| 1233 | 450 | 15 | B | -0.89  | -0.91  | 1.66   | 0.28   | -1.17  | -1.58  | 2.88   | -1.37  | -0.49  | -0.70  | 2.27   | -0.34  | -1.37  | -2.41  | 1.19   | 0.84   | 1.17   | 0.71   | 1.13   | 1.16   | 0.81   | 0.92   | 1.87   | -0.16  |
| 1234 | 450 | 16 | R | 0.39   | -6.02  | 2.73   | 1.20   | -0.25  | -5.32  | -3.39  | -1.83  | 0.59   | -11.24 | 6.36   | 0.20   | -10.26 | -5.08  | 17.31  | 13.12  | 17.19  | 14.95  | 17.11  | 15.98  | 15.36  | 17.65  | 18.01  | 20.22  |
| 1235 | 450 | 16 | G | 0.54   | -3.64  | 2.41   | -0.07  | 0.35   | -1.32  | -3.39  | -1.43  | 1.33   | -12.99 | 2.22   | 0.61   | -13.50 | -3.99  | 20.29  | 15.56  | 17.72  | 18.06  | 19.96  | 18.92  | 19.27  | 17.76  | 12.62  | 22.28  |
| 1236 | 450 | 16 | B | -0.03  | -8.68  | -0.10  | -0.55  | 0.22   | -8.02  | -6.51  | 0.74   | -2.76  | -13.77 | 0.06   | 0.32   | -10.18 | -5.90  | -36.40 | -37.44 | -39.74 | -36.57 | -39.38 | -38.64 | -38.45 | -39.46 | -52.87 | -44.14 |
| 1237 | 450 | 17 | R | 1.67   | 1.94   | 8.30   | 3.68   | 3.99   | 1.39   | 6.32   | 6.17   | 5.62   | 2.73   | 2.81   | 3.04   | 7.14   | 7.46   | -13.88 | -19.27 | -14.73 | -15.19 | -14.86 | -13.72 | -16.75 | -15.63 | -18.32 | -21.47 |
| 1238 | 450 | 17 | G | 3.80   | 4.61   | 7.28   | 9.51   | 8.39   | 8.16   | 11.23  | 9.24   | 5.25   | 6.98   | 6.27   | 7.28   | 9.31   | 14.64  | -19.25 | -33.81 | -22.06 | -21.40 | -23.34 | -19.66 | -27.27 | -23.94 | -30.22 | -36.90 |
| 1239 | 450 | 17 | B | 1.32   | 1.49   | 1.49   | 1.12   | 1.42   | -0.89  | 3.34   | 2.59   | 1.44   | 0.95   | 4.38   | 3.27   | -4.40  | 7.86   | -0.07  | -0.38  | -0.17  | -3.15  | -2.31  | -2.50  | -2.46  | -1.12  | -2.70  | -0.48  |
| 1240 | 450 | 18 | R | -21.72 | -22.04 | -21.08 | -19.32 | -18.69 | -20.81 | -20.75 | -20.60 | -23.40 | -21.67 | 4.45   | -18.71 | -20.26 | -19.07 | -20.51 | -21.33 | -22.19 | -23.70 | -24.12 | -26.15 | -25.66 | -25.42 | -19.44 | -19.66 |
| 1241 | 450 | 18 | G | 1.45   | 1.87   | 2.79   | 1.63   | 1.88   | 0.63   | 2.71   | 2.56   | 1.97   | 1.03   | 4.79   | -0.12  | 1.74   | 3.69   | 1.37   | 1.29   | 1.61   | 1.19   | 2.78   | 3.35   | 2.15   | 3.07   | 2.72   | 5.59   |
| 1242 | 450 | 18 | B | 3.73   | 1.48   | 2.68   | 1.93   | 3.14   | 1.69   | 0.90   | 2.70   | 3.47   | 1.99   | 4.36   | 1.35   | 2.90   | 5.49   | 4.66   | 5.13   | 5.94   | 5.00   | 5.59   | 6.45   | 6.48   | 5.78   | 2.21   | 5.29   |
| 1243 | 450 | 19 | R | -1.63  | -0.34  | 1.80   | -0.13  | 0.16   | -2.06  | 0.68   | -0.09  | -0.49  | -3.18  | -3.52  | -1.35  | -0.70  | -0.79  | -1.28  | -1.28  | -1.03  | -1.07  | -1.07  | -0.36  | -1.23  | 0.44   | -1.14  | 0.52   |
| 1244 | 450 | 19 | G | -2.69  | -0.72  | 1.20   | -0.65  | -0.79  | -1.73  | -1.35  | -0.55  | -0.86  | -0.87  | -5.07  | -0.26  | -0.94  | 2.21   | -0.16  | -1.11  | -0.05  | -1.17  | 0.19   | -0.29  | -0.41  | -0.61  | 0.61   | 0.56   |
| 1245 | 450 | 19 | B | 0.86   | 1.82   | 2.10   | -0.75  | 2.40   | 1.93   | 2.77   | 1.07   | 2.88   | 1.81   | 3.99   | 0.90   | 1.32   | 7.21   | 1.84   | 2.91   | 1.62   | 0.44   | 0.09   | 1.79   | 1.46   | 1.45   | 0.09   | 0.89   |
| 1246 | 450 | 20 | R | -1.49  | -6.94  | 1.86   | -8.36  | -5.52  | 2.66   | 1.72   | -5.68  | -0.85  | -11.73 | 1.62   | -3.78  | -5.23  | 12.30  | 4.91   | 3.74   | 2.14   | 1.07   | 2.26   | -0.70  | -7.03  | 2.03   | -7.20  | -4.35  |
| 1247 | 450 | 20 | G | -2.80  | -12.34 | 2.89   | -12.96 | -6.16  | 2.30   | -6.10  | -11.50 | -1.20  | -12.06 | 0.30   | -6.63  | -1.33  | 8.49   | 6.71   | 8.99   | 3.27   | 0.55   | 6.21   | 1.13   | -3.86  | 4.26   | -11.73 | -7.73  |
| 1248 | 450 | 20 | B | -2.42  | -22.23 | 2.72   | -20.37 | -6.47  | -0.71  | -11.76 | -20.72 | -1.13  | -14.08 | 5.04   | -10.97 | -0.37  | 8.08   | 6.37   | 17.55  | 6.91   | 3.11   | 10.45  | 2.79   | -2.64  | 8.39   | -14.65 | -9.10  |
| 1249 | 450 | 21 | R | 2.29   | -5.06  | 4.37   | 0.11   | -1.90  | -11.35 | -13.21 | 2.98   | 1.81   | -11.01 | -0.35  | 0.91   | -6.13  | -2.74  | 6.57   | 7.32   | 6.46   | 4.14   | 4.67   | 7.74   | 5.84   | 7.34   | 3.46   | 8.41   |
| 1250 | 450 | 21 | G | 3.76   | -8.56  | 1.70   | -0.36  | -1.32  | -15.27 | -17.61 | 4.27   | 1.08   | -13.54 | -5.16  | 1.73   | -9.51  | -5.92  | 6.69   | 6.60   | 7.65   | 6.68   | 5.68   | 8.81   | 7.81   | 7.19   | 3.82   | 8.54   |
| 1251 | 450 | 21 | B | 0.79   | -3.73  | 1.70   | -0.57  | -1.50  | -5.88  | -6.02  | -0.41  | -0.95  | -4.50  | 0.74   | -0.17  | -4.18  | -6.11  | -19.94 | -22.52 | -19.72 | -17.35 | -20.13 | -17.17 | -19.24 | -17.20 | -24.22 | -25.29 |
| 1252 | 450 | 22 | R | 0.14   | -2.20  | 3.72   | 0.60   | -1.25  | -3.66  | -3.37  | 1.39   | 1.34   | -1.93  | 0.19   | -0.39  | -4.48  | -3.29  | 2.60   | 7.08   | 3.67   | 4.46   | 2.17   | 3.24   | 2.25   | 5.13   | 3.62   | 8.94   |
| 1253 | 450 | 22 | G | 3.53   | -2.67  | 5.11   | -3.43  | -3.32  | -11.53 | -19.77 | -5.26  | 1.93   | -21.62 | -0.12  | -2.64  | -16.92 | -15.95 | 52.16  | 65.05  | 55.48  | 50.89  | 54.04  | 50.39  | 58.89  | 53.93  | 59.59  | 74.88  |
| 1254 | 450 | 22 | B | 1.12   | 1.74   | 0.37   | 1.12   | 0.85   | 0.14   | 0.56   | -1.86  | 0.57   | -5.21  | 4.68   | 1.47   | -7.10  | 0.29   | -2.03  | -3.84  | 1.46   | 0.57   | -2.57  | -2.74  | 0.34   | 0.48   | 0.39   | 1.62   |
| 1255 | 450 | 23 | R | -1.42  | 4.79   | -0.26  | 2.51   | 3.57   | 6.51   | 6.84   | 0.55   | 1.76   | 8.52   | 1.66   | 2.54   | 5.54   | 16.00  | -6.17  | -5.27  | -6.31  | -2.94  | -6.54  | -4.74  | -5.06  | -4.14  | -6.63  | -7.10  |
| 1256 | 450 | 23 | G | -0.82  | 5.11   | 0.44   | 2.14   | 3.22   | 5.77   | 7.01   | 2.08   | 2.19   | 6.52   | 1.70   | 1.48   | 6.87   | 9.17   | -6.48  | -8.60  | -7.78  | -6.70  | -7.28  | -6.25  | -8.36  | -6.81  | -9.07  | -9.94  |
| 1257 | 450 | 23 | B | 0.59   | 1.10   | 2.29   | 1.51   | 1.48   | 1.40   | 4.47   | 1.39   | 2.96   | 4.46   | 2.29   | 1.39   | 3.06   | 6.41   | 2.54   | -5.32  | -3.25  | -3.89  | -6.08  | -3.03  | -1.74  | -3.06  | -4.78  | -3.51  |
| 1258 | 450 | 24 | R | 2.10   | 0.52   | 3.06   | 3.70   | 2.26   | -5.86  | -2.02  | -4.40  | 3.08   | -0.03  | -1.55  | 2.07   | 4.47   | -3.29  | 1.79   | 2.69   | 3.63   | 4.88   | 7.33   | 4.39   | 2.77   | 6.15   | 4.33   | 4.38   |
| 1259 | 450 | 24 | G | 6.08   | 3.41   | 4.73   | 7.02   | 3.36   | -7.99  | -4.54  | 9.53   | 6.07   | 0.38   | 2.57   | 4.52   | 0.63   | -3.43  | 6.26   | 3.80   | 9.82   | 14.94  | 20.18  | 10.66  | 8.60   | 12.51  | 6.90   | 7.74   |
| 1260 | 450 | 24 | B | 2.90   | -3.74  | 2.93   | 2.23   | 0.06   | -7.67  | -4.09  | 4.57   | -0.39  | -0.73  | 7.41   | 1.74   | -5.92  | -0.32  | -1.34  | -0.77  | 0.22   | -1.51  | -4.46  | -1.03  | -1.25  | -1.31  | -2.95  | -1.27  |
| 1261 | 450 | 25 | R | 0.30   | -3.98  | 1.70   | 0.39   | 2.33   | 1.08   | 2.52   | 1.40   | 1.57   | -0.46  | -16.41 | 0.68   | 1.92   | 2.61   | 1.18   | 0.56   | 2.11   | 0.46   | 5.26   | 2.34   | 8.00   | 0.36   | 0.71   | 1.11   |
| 1262 | 450 | 25 | G | -1.06  | 0.66   | 2.74   | 0.61   | -0.24  | -0.43  | 0.53   | 1.29   | 1.37   | 0.51   | 1.16   | -0.37  | 0.64   | 1.35   | 4.05   | 0.64   | 4.60   | 1.03   | 14.58  | 3.52   | -0.07  | 3.39   | 2.16   | 1.10   |
| 1263 | 450 | 25 | B | 1.42   | -3.46  | -0.24  | -1.05  | 0.47   | 0.05   | -1.43  | 0.45   | 1.89   | -2.14  | 4.21   | -0.50  | 0.09   | 0.74   | 7.09   | 0.82   | 5.71   | 2.87   | 21.90  | 4.67   | -0.52  | 3.79   | -0.88  | -1.07  |
| 1264 | 450 | 26 | R | 0.21   | -3.86  | 2.26   | -0.95  | 0.26   | -15.14 | -9.86  | 1.30   | 0.10   | -12.97 | -13.95 | 0.30   | -8.80  | -9.92  | 12.89  |        |        |        |        |        |        |        |        |        |

|      |     |    |   |        |        |        |        |        |        |        |        |        |        |        |        |        |        |        |        |        |        |        |        |        |        |        |        |
|------|-----|----|---|--------|--------|--------|--------|--------|--------|--------|--------|--------|--------|--------|--------|--------|--------|--------|--------|--------|--------|--------|--------|--------|--------|--------|--------|
| 1327 | 480 | 11 | R | -1.51  | 1.15   | 4.07   | 2.95   | 1.38   | 3.34   | 2.61   | 0.27   | 2.08   | 1.16   | 6.88   | -2.44  | 2.03   | -1.94  | 0.56   | 0.07   | 1.05   | -1.65  | 0.19   | -0.17  | -0.18  | 1.01   | 0.09   | 1.41   |
| 1328 | 480 | 11 | G | -1.15  | -0.32  | 1.72   | 0.39   | 1.21   | 0.77   | 0.52   | -0.39  | -0.69  | -0.15  | 5.04   | -0.77  | -0.38  | 3.29   | -2.24  | -1.40  | -0.21  | -1.26  | -0.55  | -0.35  | -0.26  | -0.40  | -1.12  | 0.26   |
| 1329 | 480 | 11 | B | 1.68   | 2.77   | 2.70   | 1.88   | -1.30  | 3.92   | 1.89   | 0.29   | 1.52   | 1.97   | 3.38   | -0.94  | 0.66   | 0.81   | 0.35   | 0.25   | 2.24   | -0.28  | 3.27   | 1.33   | 1.15   | 1.75   | 2.10   | 2.71   |
| 1330 | 480 | 12 | R | -13.07 | 0.36   | -8.93  | 3.25   | 0.09   | 0.11   | 2.26   | 2.31   | -13.54 | 0.81   | 1.73   | -2.77  | 0.43   | 0.33   | -10.36 | -13.23 | -12.15 | -15.41 | -13.23 | -17.20 | -12.14 | -11.68 | 2.36   | 3.33   |
| 1331 | 480 | 12 | G | 0.70   | 1.91   | 3.39   | 2.94   | 1.35   | 3.11   | 2.44   | 1.15   | 2.23   | 2.25   | 0.66   | 0.36   | 3.00   | 1.35   | -0.21  | 1.11   | 0.85   | 1.34   | 2.40   | 2.21   | 1.39   | 2.48   | 1.13   | 1.16   |
| 1332 | 480 | 12 | B | 11.87  | 0.05   | 18.17  | 5.67   | 0.46   | 4.21   | 3.10   | 3.90   | 8.40   | 3.42   | 3.26   | 2.33   | 4.77   | 5.89   | 19.03  | 3.33   | 5.98   | 5.69   | 5.97   | 8.26   | 3.82   | 5.92   | 2.00   | 1.37   |
| 1333 | 480 | 13 | R | 2.09   | 3.98   | 5.12   | 4.42   | 4.33   | 5.81   | 4.42   | 3.23   | 5.12   | 4.18   | 0.61   | 2.81   | 4.11   | 10.13  | 1.14   | 0.83   | 2.13   | 1.03   | 0.91   | 1.99   | 0.41   | 1.23   | 1.46   | 1.41   |
| 1334 | 480 | 13 | G | 2.33   | 3.30   | 5.58   | 2.97   | 4.73   | 4.21   | 4.11   | 2.07   | 3.93   | 4.62   | -1.23  | 2.04   | 3.69   | 6.41   | 0.10   | 2.03   | 2.94   | 1.12   | 1.75   | 1.08   | 1.48   | 2.13   | 2.15   | 1.59   |
| 1335 | 480 | 13 | B | 1.83   | 2.57   | 5.06   | 3.71   | 3.99   | 3.66   | 4.46   | 2.10   | 2.27   | 3.25   | 0.05   | -0.22  | 3.68   | 2.61   | -0.81  | 1.05   | 0.92   | 1.70   | 1.37   | 1.63   | 1.39   | 2.54   | -0.23  | 1.50   |
| 1336 | 480 | 14 | R | -1.40  | -1.34  | 3.28   | 1.80   | 1.08   | -1.85  | -4.70  | 0.31   | 1.35   | -6.72  | 1.44   | -0.18  | -0.13  | -1.17  | -1.36  | -2.09  | -0.40  | 0.81   | 0.48   | -0.41  | -0.29  | 0.34   | -3.44  | -0.88  |
| 1337 | 480 | 14 | G | -0.07  | -0.12  | 2.32   | 1.26   | 1.36   | 1.54   | -0.45  | 0.25   | 2.85   | -0.35  | 0.75   | -0.44  | -0.54  | 0.93   | -1.91  | -2.25  | -0.76  | -2.33  | -0.25  | -1.32  | -2.28  | -1.06  | -1.94  | -0.99  |
| 1338 | 480 | 14 | B | -0.30  | 3.73   | 4.25   | 1.40   | 2.36   | 3.47   | 2.84   | 2.02   | 4.50   | 4.79   | 2.08   | 2.37   | 4.34   | 3.06   | 2.59   | 2.99   | 2.17   | 1.81   | 2.25   | 1.76   | 1.05   | 1.49   | 4.28   | 1.98   |
| 1339 | 480 | 15 | R | 1.95   | 3.46   | 8.54   | 4.79   | 4.66   | 1.96   | 6.66   | 2.83   | 4.41   | 2.02   | 0.83   | 2.68   | 6.19   | 9.09   | -4.80  | -2.90  | -2.91  | -5.35  | -3.94  | -2.92  | -3.83  | -3.21  | -5.12  | -3.41  |
| 1340 | 480 | 15 | G | 2.49   | 1.88   | 1.19   | 1.37   | 1.22   | 2.97   | 6.79   | 0.57   | 1.88   | 3.74   | 2.57   | -0.22  | 4.50   | 5.44   | 2.16   | 1.96   | 3.01   | 2.80   | 2.37   | 1.87   | 3.10   | 3.32   | 4.65   | 2.79   |
| 1341 | 480 | 15 | B | -0.66  | 0.14   | 0.75   | -0.12  | -0.71  | -1.36  | -2.77  | -2.64  | -0.80  | -2.01  | 0.72   | -0.31  | -0.51  | -1.09  | -1.09  | -0.31  | 0.87   | -0.21  | -0.30  | -0.39  | 0.20   | 1.57   | 0.79   | -0.09  |
| 1342 | 480 | 16 | R | 1.71   | -6.36  | 3.16   | 1.48   | 0.30   | -1.65  | -2.51  | -2.03  | -0.80  | -11.47 | 5.37   | 0.52   | -10.42 | -4.18  | 16.76  | 12.21  | 17.34  | 15.41  | 17.70  | 15.17  | 14.36  | 17.73  | 15.40  | 17.81  |
| 1343 | 480 | 16 | G | 0.96   | -3.78  | 2.50   | 0.62   | 1.09   | 1.69   | -3.00  | -1.90  | 0.28   | -13.05 | 0.86   | 0.50   | -13.71 | -3.12  | 19.58  | 14.42  | 17.90  | 17.33  | 19.57  | 17.50  | 17.64  | 18.39  | 11.06  | 19.48  |
| 1344 | 480 | 16 | B | 0.73   | -7.46  | 0.39   | 1.13   | 0.36   | -3.34  | -3.92  | -4.58  | -4.35  | -14.56 | -0.63  | 2.18   | -9.87  | -6.64  | -36.52 | -36.44 | -39.30 | -36.70 | -39.19 | -38.34 | -37.42 | -41.37 | -50.05 | -39.72 |
| 1345 | 480 | 17 | R | 1.84   | 1.60   | 7.79   | 4.69   | 4.09   | 3.14   | 6.52   | 4.29   | 5.83   | 2.28   | 1.84   | 1.39   | 6.92   | 6.63   | -13.60 | -19.90 | -14.75 | -15.47 | -14.79 | -13.91 | -15.83 | -16.20 | -18.54 | -20.54 |
| 1346 | 480 | 17 | G | 3.63   | 5.41   | 8.34   | 9.85   | 9.42   | 8.76   | 12.72  | 9.95   | 6.61   | 7.11   | 5.28   | 7.46   | 9.89   | 15.54  | -19.81 | -32.89 | -22.20 | -21.41 | -23.28 | -19.73 | -26.35 | -24.43 | -29.33 | -35.70 |
| 1347 | 480 | 17 | B | 1.63   | 1.99   | 3.83   | 2.99   | 1.31   | -0.19  | 3.54   | 2.33   | 4.23   | 2.65   | 3.64   | -2.82  | -3.65  | 7.34   | -1.20  | 0.30   | -0.06  | -4.24  | -2.21  | -2.38  | -1.23  | -0.81  | -2.35  | 0.46   |
| 1348 | 480 | 18 | R | -23.03 | -22.86 | -22.31 | -20.76 | -19.73 | -20.45 | -22.56 | -23.48 | -24.20 | -21.16 | 0.57   | -21.06 | -21.37 | -19.75 | -21.01 | -22.24 | -23.95 | -24.47 | -25.92 | -26.82 | -25.48 | -25.82 | -21.71 | -21.36 |
| 1349 | 480 | 18 | G | 1.24   | 1.42   | 2.90   | 2.48   | 3.50   | 1.46   | 3.61   | 2.40   | 2.00   | 1.42   | 3.71   | -0.48  | 1.86   | 3.95   | 1.65   | 1.94   | 1.69   | 0.87   | 2.66   | 2.79   | 1.88   | 2.74   | 2.27   | 2.62   |
| 1350 | 480 | 18 | B | 5.03   | 2.40   | 3.83   | 2.86   | 1.88   | 3.54   | 1.47   | 3.96   | 4.01   | 1.04   | 4.03   | 3.24   | 3.29   | 5.17   | 4.81   | 5.54   | 7.12   | 4.52   | 6.23   | 6.82   | 4.69   | 6.13   | 3.21   | 6.14   |
| 1351 | 480 | 19 | R | -1.06  | -0.50  | 1.68   | 0.57   | 0.01   | 0.20   | 1.35   | -0.29  | -0.12  | -2.62  | -6.52  | -1.60  | -0.74  | -1.37  | -1.22  | -1.29  | 0.96   | -2.62  | -0.72  | -0.06  | -0.90  | 0.38   | 0.55   | 0.26   |
| 1352 | 480 | 19 | G | -2.78  | -1.07  | 0.36   | -0.38  | -0.40  | -0.68  | -1.34  | -1.20  | -0.66  | -0.50  | -5.72  | -0.62  | -0.87  | 3.26   | -0.16  | -1.75  | -0.25  | -0.68  | -0.57  | -0.16  | -0.69  | -0.08  | 0.34   | 0.10   |
| 1353 | 480 | 19 | B | 1.46   | 0.45   | 2.70   | 0.10   | 2.01   | 2.71   | 2.50   | 0.25   | 2.47   | 1.83   | 4.51   | -0.28  | 1.56   | 6.39   | 1.34   | 2.08   | 1.52   | 1.15   | 2.57   | 2.70   | 1.54   | 0.97   | 0.00   | 1.63   |
| 1354 | 480 | 20 | R | -3.75  | -7.51  | 1.58   | -7.74  | -6.51  | 3.75   | 3.56   | -7.17  | -1.47  | -13.37 | -1.58  | -4.28  | -3.34  | 12.46  | 2.21   | 4.16   | 2.60   | 0.44   | 3.03   | -0.85  | -5.81  | 1.43   | -9.11  | -4.36  |
| 1355 | 480 | 20 | G | -2.44  | -13.53 | 1.78   | -13.40 | -6.88  | 2.80   | -3.11  | -12.63 | 0.73   | -14.86 | -1.40  | -7.81  | -0.78  | 8.59   | 3.13   | 9.39   | 3.81   | 0.85   | 6.51   | 2.37   | -4.45  | 3.29   | -13.89 | -6.45  |
| 1356 | 480 | 20 | B | -2.42  | -23.53 | 2.05   | -21.61 | -8.70  | -1.83  | -10.17 | -22.68 | 0.22   | -17.40 | 4.69   | -11.86 | 1.08   | 7.92   | 4.57   | 18.01  | 6.41   | 3.89   | 11.49  | 2.05   | -6.69  | 8.68   | -15.86 | -7.52  |
| 1357 | 480 | 21 | R | 2.79   | -5.45  | 5.03   | 0.32   | -1.94  | -10.27 | -12.78 | 3.70   | 1.07   | -12.06 | -2.22  | 0.90   | -5.81  | -3.71  | 4.43   | 5.52   | 6.28   | 3.68   | 4.55   | 7.10   | 5.16   | 7.59   | 1.08   | 5.84   |
| 1358 | 480 | 21 | G | 4.12   | -8.67  | 6.70   | -0.03  | -0.05  | -15.20 | -18.00 | 5.09   | 1.74   | -13.06 | -5.90  | 1.75   | -8.83  | -6.00  | 6.85   | 7.34   | 7.10   | 5.72   | 5.31   | 8.09   | 6.32   | 6.81   | 2.56   | 6.81   |
| 1359 | 480 | 21 | B | 0.16   | -3.48  | 2.64   | -0.52  | -2.30  | -4.91  | -5.12  | -0.18  | -1.85  | -3.70  | -0.10  | -0.14  | -4.57  | -8.29  | -20.15 | -19.31 | -17.43 | -16.25 | -18.18 | -17.04 | -17.04 | -17.36 | -19.85 | -19.69 |
| 1360 | 480 | 22 | R | -0.64  | -3.33  | 3.32   | 0.63   | -0.78  | -1.18  | -2.27  | 0.18   | 1.62   | -2.50  | 0.38   | -2.08  | -5.60  | -3.64  | 2.28   | 6.58   | 4.16   | 4.80   | 3.16   | 3.94   | 4.27   | 5.28   | 3.45   | 8.56   |
| 1361 | 480 | 22 | G | 3.50   | 3.59   | 5.92   | -3.60  | -2.82  | -10.41 | -18.79 | -6.53  | 4.42   | -22.97 | 0.66   | -3.62  | -17.97 | -15.95 | 52.21  | 63.43  | 55.97  | 51.07  | 53.77  | 48.30  | 57.11  | 55.71  | 58.67  | 70.53  |
| 1362 | 480 | 22 | B | 0.48   | 3.77   | 2.32   | 0.89   | 0.45   | 0.37   | 1.33   | -1.41  | 1.52   | -4.18  | 3.99   | 0.21   | -6.95  | -0.58  | -1.66  | -4.46  | 0.99   | 0.10   | -1.32  | -2.22  | 0.03   | 0.24   | 1.20   | -2.37  |
| 1363 | 480 | 23 | R | -2.32  | 5.29   | 0.63   | 3.13   | 3.65   | 7.92   | 7.27   | 0.09   | 1.82   | 8.52   | 0.48   | 2.39   | 6.99   | 15.50  | -5.06  | -5.26  | -6.25  | -3.12  | -6.26  | -4.99  | -4.59  | -4.84  | -6.60  | -5.93  |
| 1364 | 480 | 23 | G | -0.75  | 4.66   | -0.47  | 2.69   | 3.59   | 6.47   | 6.69   | 1.66   | 2.31   | 6.64   | 0.18   | 1.02   | 6.04   | 9.05   | -7.27  | -8.53  | -7.82  | -6.74  | -7.24  | -5.55  | -7.74  | -6.60  | -8.31  | -8.89  |
| 1365 | 480 | 23 | B | 0.29   | 1.63   | 7.01   | 2.31   | 0.82   | 4.29   | 3.83   | -0.94  | 3.70   | 4.80   | 1.53   | 0.73   | 2.06   | 6.21   | 1.81   | -5.00  | -3.98  | -3.69  | -5.46  | -3.72  | -3.33  | -1.39  | -3.97  | -3.55  |
| 1366 | 480 | 24 | R | 1.90   | 1.32   | 2.87   | 4.33   | 3.25   | -3.36  | -1.76  | 3.05   | 3.36   | -0.23  | -2.30  | 0.99   | 0.82   | -3.54  | 2.10   | 2.27   | 3.88   | 4.90   | 6.82   | 4.15   | 2.77   | 6.15   | 3.45   | 3.64   |
| 1367 | 480 | 24 | G | 6.11   | 3.60   | 4.85   | 7.60   | 4.35   | -7.61  | -3.84  | 8.76   | 6.69   | 1.14   | 2.79   | 4.18   | 1.18   | -3.20  | 5.39   | 3.77   | 9.87   | 14.53  | 19.62  | 10.57  | 8.72   | 12.63  | 7.49   | 7.88   |
| 1368 | 480 | 24 | B | 3.74   | -2.91  | 3.15   | 1.62   | -0.70  | -7.03  | -5.40  | 4.14   | -0.99  | -0.91  | 7.23   | 2.07   | -6.34  | -1.58  | -0.76  | -1.28  | -1.66  | -0.80  | -1.62  | -1.06  | -0.78  | -1.60  | -3.86  | -1.78  |
| 1369 | 480 | 25 | R | 1.32   | -0.01  | 1.90   | 1.59   | 1.47   | 3.04   | 1.93   | 0.23   | 1.89   | 3.38   | -19.32 | 0.60   | 2.54   | 2.41   | 1.43   | 0.28   | 2.52   | 0.10   | 5.97   | 2.71   | 1.08   | 4.08   | 0.43   | 1.13   |
| 1370 | 480 | 25 | G | -1.27  | 0.76   | 1.63   | 0.36   | 1.82   | 1.62   | 0.78   | 0.31   | 1.32   | 0.83   | 0.68   | -0.24  | 1.01   | 0.94   | 4.33   | 1.16   | 4.23   | 1.94   | 13.90  | 2.94   | 0.62   | 3.89   | 2.03   | 0.47   |
| 1371 | 480 | 25 | B | 1.58   | -2.79  | 1.05   | -1.27  | -1.19  | 0.56   | -0.82  | 0.45   | 1.93   | -2.10  | 4.13   | -1.73  | 0.72   | 0.58   | 7.95   | -0.19  | 5.50   | 2.46   | 23.13  | 6.16   | 0.09   | 4.29   | -0.34  | -0.26  |
| 1372 | 480 | 26 | R | -0.18  | -3.60  | 2.82   | 0.43   | 0.66   | -13.76 | -10.31 | 1.03   | 0.32   | -13.30 | -16.45 | -1.28  | -8.97  | -10.09 | 11.92  | 14.55  | 12.26  | 11.48  | 11.68  | 11.17  | 10.58  | 13.24  | 7.62   | 13.03  |
| 1373 | 480 | 26 | G | 1.27   | -5.47  | 2.40   | 1.09   | -1.07  | -18.59 | -14.62 | 1.09   | 2.26   | -15.09 | -22.96 | -1.37  | -11.16 | -12.97 | 13.02  | 14.26  | 13.79  | 10.83  | 11.57  | 12.73  | 9.66   | 12.14  | 6.92   | 12.54  |
| 1374 | 480 | 26 | B | 2.62   | -0.77  | 2.03   | 0.39   | 2.57   | -3.39  | -2.95  | 2.29   | 0.92   | -2.30  | -30.35 | 0.65   | -3.20  | -1.21  | -8.21  | -11.17 | -7.66  | -5.73  | -7.59  | -8.39  | -7.64  | -6.49  | -6.30  | -7.50  |
| 1375 | 480 | 27 | R | 0.52   | -1.16  | 2.93   | 1.91   | 0.63   | -2.00  | -1.15  | 2.01   | 0.86   | -2.96  | 2.97   | -1.81  | -0.36  | -2.76  | -1.32  |        |        |        |        |        |        |        |        |        |

|      |     |    |   |        |        |        |        |        |        |        |        |        |        |        |        |        |        |        |        |         |        |        |        |        |        |        |        |
|------|-----|----|---|--------|--------|--------|--------|--------|--------|--------|--------|--------|--------|--------|--------|--------|--------|--------|--------|---------|--------|--------|--------|--------|--------|--------|--------|
| 1438 | 510 | 12 | R | -13.43 | 1.03   | -8.47  | 2.65   | -0.40  | 1.02   | 3.40   | 2.52   | -14.37 | 1.91   | 2.02   | -2.10  | 0.01   | 0.29   | -12.08 | -13.59 | -13.20  | -15.31 | -13.06 | -17.26 | -13.72 | -12.16 | 2.01   | 3.39   |
| 1439 | 510 | 12 | G | 0.02   | 2.17   | 2.05   | 2.63   | 0.08   | 3.55   | 3.05   | 1.49   | 1.37   | 3.70   | 1.40   | 0.20   | 3.17   | 1.70   | 0.00   | 1.77   | 2.01    | 1.93   | 2.99   | 2.04   | 2.38   | 2.21   | 0.89   | 0.57   |
| 1440 | 510 | 12 | B | 12.88  | 0.93   | 19.09  | 6.68   | 0.17   | 4.74   | 2.95   | 3.14   | 9.73   | 3.76   | 1.51   | 1.82   | 4.05   | 6.66   | 18.64  | 3.72   | 6.33    | 7.17   | 1.68   | 8.61   | 5.01   | 5.10   | 1.60   | 1.32   |
| 1441 | 510 | 13 | R | 2.49   | 4.32   | 5.01   | 4.43   | 4.14   | 5.96   | 4.97   | 3.78   | 4.92   | 4.84   | -0.18  | 3.49   | 4.89   | 9.45   | 2.08   | 2.15   | 3.15    | 0.64   | 1.93   | 2.29   | 1.60   | 2.74   | 1.42   | 1.23   |
| 1442 | 510 | 13 | G | 2.26   | 3.81   | 5.15   | 3.61   | 4.53   | 4.94   | 5.70   | 2.56   | 4.01   | 5.88   | -0.90  | 2.33   | 2.88   | 7.04   | 0.10   | 1.88   | 2.85    | 0.94   | 2.06   | 0.95   | 1.67   | 2.54   | 2.21   | 1.74   |
| 1443 | 510 | 13 | B | 1.32   | 1.98   | 4.55   | 1.88   | 3.03   | 4.04   | 4.87   | 2.50   | 2.45   | 4.87   | -0.54  | -0.37  | 4.32   | 2.85   | 0.32   | 1.34   | 1.62    | 1.70   | 2.32   | 1.44   | 1.81   | 2.54   | 0.94   | 0.83   |
| 1444 | 510 | 14 | R | -0.98  | -1.12  | 2.99   | 0.93   | 0.93   | -2.48  | -3.15  | 1.40   | 0.99   | -4.23  | 1.36   | 0.02   | -0.66  | -1.87  | -1.01  | -1.66  | 0.77    | 1.48   | 0.24   | 0.03   | -0.50  | 1.33   | -2.18  | 0.23   |
| 1445 | 510 | 14 | G | -0.76  | 0.56   | 2.12   | 2.48   | 0.50   | 0.69   | -0.67  | 0.73   | 2.12   | 0.52   | 1.63   | -0.10  | -0.14  | 1.11   | -2.27  | -0.55  | -0.48   | -1.73  | 0.09   | -0.66  | -1.23  | -0.37  | -1.46  | -0.35  |
| 1446 | 510 | 14 | B | 0.50   | 1.42   | 2.91   | 2.45   | 1.94   | 2.95   | 3.93   | 1.75   | 4.24   | 5.30   | 1.10   | 0.85   | 3.63   | 9.85   | 2.59   | 1.53   | 2.89    | 2.08   | 2.43   | 1.19   | 1.67   | 2.85   | 3.54   | 2.13   |
| 1447 | 510 | 15 | R | 2.39   | 4.15   | 7.56   | 4.94   | 3.06   | 2.13   | 7.64   | 2.03   | 3.74   | 2.63   | 1.66   | 3.21   | 6.16   | 3.51   | -3.52  | -2.65  | -1.91   | -3.86  | -1.91  | -2.26  | -2.58  | -2.29  | -2.12  | -2.52  |
| 1448 | 510 | 15 | G | 0.33   | 1.83   | 0.75   | 1.35   | 1.79   | 2.77   | 7.45   | 0.98   | 1.69   | 4.28   | 2.34   | 0.12   | 3.69   | 6.42   | 1.84   | 1.77   | 3.34    | 2.89   | 2.06   | 1.92   | 2.77   | 3.36   | 3.61   | 3.01   |
| 1449 | 510 | 15 | B | -1.04  | -0.95  | 1.90   | 0.64   | -0.95  | -2.06  | 2.97   | -2.05  | -0.48  | 0.15   | 1.34   | -0.25  | 1.55   | -1.37  | 0.00   | -0.75  | 2.28    | -0.30  | 0.26   | -0.88  | 0.61   | 1.98   | 2.06   | -1.92  |
| 1450 | 510 | 16 | R | 0.98   | -6.32  | 2.97   | 1.84   | -0.03  | -5.43  | -3.11  | -2.93  | 0.39   | -10.99 | 5.71   | 0.98   | -9.70  | -5.04  | 15.17  | 11.27  | 15.67   | 13.21  | 16.30  | 14.26  | 12.68  | 15.53  | 13.28  | 15.33  |
| 1451 | 510 | 16 | G | 0.25   | -3.20  | 2.21   | 0.93   | 1.05   | -1.85  | -3.16  | -1.91  | 2.25   | -12.57 | 0.54   | 0.99   | -14.05 | -3.19  | 17.50  | 12.67  | 16.37   | 16.11  | 18.28  | 15.57  | 15.19  | 16.18  | 8.49   | 15.65  |
| 1452 | 510 | 16 | B | 1.13   | -6.73  | 1.84   | 0.90   | 0.73   | -7.54  | -4.60  | 0.53   | -1.98  | -13.81 | -0.79  | 1.08   | -10.21 | -7.65  | -34.46 | -34.91 | -37.66  | -35.59 | -36.39 | -36.37 | -33.50 | -39.04 | -47.94 | -36.65 |
| 1453 | 510 | 17 | R | 2.22   | 3.21   | 7.87   | 6.72   | 3.24   | 3.77   | 7.85   | 5.47   | 7.00   | 3.85   | 2.31   | 2.87   | 7.16   | 7.63   | -13.68 | -18.31 | -14.21  | -14.43 | -13.70 | -12.78 | -14.62 | -15.46 | -17.26 | -19.44 |
| 1454 | 510 | 17 | G | 4.11   | 5.72   | 8.30   | 10.07  | 9.29   | 9.93   | 13.14  | 11.00  | 6.57   | 8.80   | 5.75   | 7.77   | 10.13  | 15.58  | -19.40 | -32.06 | -21.79  | -20.45 | -21.61 | -18.28 | -25.41 | -24.42 | -27.80 | -34.20 |
| 1455 | 510 | 17 | B | 0.75   | -2.12  | 2.02   | 3.57   | 1.22   | 0.43   | 3.22   | 2.46   | 4.92   | 2.23   | 3.26   | 2.21   | -3.28  | 7.43   | -1.06  | 0.66   | 0.45    | -2.88  | -1.79  | -0.52  | -1.99  | -1.26  | -2.25  | 0.90   |
| 1456 | 510 | 18 | R | -25.26 | -24.70 | -25.70 | -21.96 | -22.06 | -23.11 | -23.68 | -23.72 | -26.29 | -23.52 | 1.07   | -20.40 | -23.10 | -21.05 | -23.16 | -23.28 | -25.30  | -26.96 | -26.95 | -29.41 | -28.13 | -27.72 | -22.07 | -24.04 |
| 1457 | 510 | 18 | G | 1.33   | 2.03   | 3.43   | 1.99   | 1.29   | 1.99   | 3.64   | 2.48   | 2.52   | 2.68   | 4.11   | -0.55  | 2.31   | 4.19   | 1.90   | 2.08   | 2.04    | 1.66   | 2.72   | 3.41   | 2.90   | 3.48   | 2.70   | 3.08   |
| 1458 | 510 | 18 | B | 4.43   | 1.84   | 4.72   | 2.32   | 3.62   | 4.49   | 2.31   | 3.87   | 3.26   | 3.55   | 4.18   | 0.57   | 3.87   | 5.25   | 4.28   | 5.67   | 7.73    | 4.62   | 7.18   | 6.32   | 6.75   | 7.49   | 3.09   | 5.74   |
| 1459 | 510 | 19 | R | -2.00  | -0.50  | 0.27   | 0.92   | -1.92  | 0.04   | 2.01   | 0.03   | -0.37  | 1.41   | -6.74  | -0.90  | -1.13  | -1.44  | -0.67  | -1.96  | -0.60   | -0.83  | -0.51  | 0.00   | -0.06  | 1.39   | -0.71  | -0.70  |
| 1460 | 510 | 19 | G | -2.83  | -0.43  | 0.08   | -0.89  | -0.26  | -0.29  | -0.82  | -1.01  | -0.53  | -0.01  | -6.49  | -0.40  | -1.01  | 3.16   | -1.44  | -1.26  | 0.73    | -1.26  | 0.59   | 0.14   | -0.81  | -0.85  | 0.47   | -1.18  |
| 1461 | 510 | 19 | B | 0.09   | 0.29   | 1.90   | 0.72   | 1.54   | 2.76   | 2.62   | -0.10  | 1.83   | 3.06   | 3.91   | 0.60   | 7.00   | 6.02   | 2.19   | 1.56   | 1.72    | 1.31   | 1.30   | 2.95   | 1.80   | 0.96   | 0.66   | 1.32   |
| 1462 | 510 | 20 | R | -2.68  | -4.69  | 2.00   | -8.16  | -6.06  | 3.63   | 5.68   | -7.21  | -1.73  | -12.78 | -1.24  | -5.52  | -4.72  | 11.97  | 2.87   | 4.21   | 2.08    | 0.00   | 10.85  | 0.56   | -5.90  | 1.95   | -8.31  | -4.25  |
| 1463 | 510 | 20 | G | -4.10  | -10.89 | 1.38   | -14.29 | -5.98  | 2.73   | -2.85  | -13.59 | -0.97  | -13.89 | -1.52  | -7.76  | -1.51  | 9.74   | 2.75   | 8.99   | 4.10    | 1.47   | 14.81  | 1.89   | -4.33  | 4.49   | -13.11 | -6.23  |
| 1464 | 510 | 20 | B | -2.86  | -20.52 | 2.19   | -23.22 | -8.15  | -3.48  | -9.66  | -23.33 | 0.30   | -16.86 | 4.85   | -13.73 | 0.47   | 8.71   | 4.85   | 19.82  | 7.76    | 4.05   | 18.97  | 3.79   | -2.93  | 8.10   | -14.54 | -7.86  |
| 1465 | 510 | 21 | R | 2.30   | -4.85  | 4.79   | -1.20  | -2.17  | -9.90  | -13.18 | 3.94   | 1.58   | -12.36 | -2.24  | 1.66   | -5.57  | -3.48  | 3.59   | 4.43   | 6.10    | 2.68   | 2.85   | 5.64   | 4.11   | 6.75   | 0.97   | 4.55   |
| 1466 | 510 | 21 | G | 4.33   | -8.66  | 7.18   | 0.55   | -1.48  | -15.12 | -17.86 | 4.95   | 1.69   | -13.18 | -7.64  | 1.57   | -8.52  | -6.11  | 5.69   | 5.31   | 6.54    | 5.80   | 5.61   | 7.82   | 5.75   | 5.93   | 1.11   | 4.75   |
| 1467 | 510 | 21 | B | -0.21  | -3.03  | 2.79   | 0.50   | -1.78  | -5.29  | -5.74  | 0.34   | -0.75  | -3.28  | -0.67  | -0.15  | -3.84  | -6.15  | -16.69 | -15.19 | -14.52  | -14.45 | -14.86 | -14.49 | -13.30 | -14.23 | -16.09 | -11.10 |
| 1468 | 510 | 22 | R | -0.83  | -3.54  | 2.67   | 0.84   | -1.65  | -1.80  | -3.14  | 0.72   | 0.08   | 0.04   | -0.79  | -0.58  | -5.93  | -3.45  | 2.31   | 6.79   | 3.62    | 3.65   | 3.04   | 3.60   | 4.26   | 5.13   | 2.64   | 7.51   |
| 1469 | 510 | 22 | G | 2.83   | -1.10  | 5.40   | -3.32  | -3.94  | -9.95  | -18.32 | 6.32   | 1.00   | -23.78 | -0.79  | -1.79  | -17.99 | -15.94 | 49.81  | 60.35  | 54.88   | 50.03  | 52.53  | 47.70  | 54.08  | 53.42  | 56.56  | 64.51  |
| 1470 | 510 | 22 | B | 0.23   | 1.10   | 0.90   | 0.66   | 0.34   | 1.43   | 0.70   | -1.23  | 1.01   | -4.95  | 3.68   | 3.33   | -0.70  | 0.32   | -1.50  | -3.84  | 0.60    | -0.20  | -2.31  | -3.30  | -0.03  | 0.31   | 0.92   | -1.52  |
| 1471 | 510 | 23 | R | -2.67  | 5.14   | -0.10  | 3.22   | 3.20   | 8.06   | 8.16   | 0.10   | 1.98   | 9.08   | 0.68   | 2.17   | 6.90   | 15.50  | -4.69  | -5.08  | -5.92   | -4.01  | -5.89  | -3.55  | -4.14  | -4.13  | -5.87  | -4.81  |
| 1472 | 510 | 23 | G | -0.88  | 4.57   | -0.26  | 2.54   | 3.49   | 7.21   | 7.20   | 1.85   | 2.09   | 7.50   | -0.32  | 2.15   | 5.83   | 9.23   | -6.89  | -7.56  | -6.64   | -6.28  | -6.51  | -6.03  | -7.29  | -6.26  | -7.54  | -8.27  |
| 1473 | 510 | 23 | B | 0.04   | 1.85   | 1.18   | 2.25   | 2.19   | 3.80   | 3.91   | -0.96  | 3.90   | 5.50   | 1.42   | 0.10   | 3.30   | 5.52   | 2.47   | -4.11  | -2.51   | -3.60  | -4.66  | -2.16  | -1.90  | -2.86  | -2.42  |        |
| 1474 | 510 | 24 | R | 1.43   | 1.86   | 2.15   | 4.63   | 1.66   | -2.72  | -0.39  | 4.48   | 3.07   | 1.19   | -3.33  | 1.76   | 1.41   | -4.26  | 0.87   | 1.59   | 5.06    | 4.32   | 7.16   | 4.83   | 2.71   | 6.34   | 3.08   | 4.10   |
| 1475 | 510 | 24 | G | 5.84   | 4.64   | 4.41   | 8.21   | 4.46   | -5.46  | -2.75  | 8.33   | 6.80   | 2.66   | 2.72   | 4.82   | 1.61   | -2.84  | 5.55   | 4.31   | 10.60   | 15.23  | 20.09  | 10.35  | 8.78   | 12.54  | 7.54   | 7.18   |
| 1476 | 510 | 24 | B | 4.85   | -4.15  | 2.95   | 1.85   | 0.64   | -7.56  | -4.48  | 4.90   | -0.37  | -0.29  | 6.63   | 0.71   | -6.48  | -0.27  | -0.79  | -0.91  | -0.63   | -2.09  | -2.09  | -0.94  | -5.54  | -1.27  | -3.06  | -5.52  |
| 1477 | 510 | 25 | R | 0.48   | -0.07  | 1.36   | 1.93   | 0.93   | 2.59   | 2.39   | 0.44   | 1.94   | 1.63   | -19.17 | 0.41   | 2.61   | 2.97   | 1.56   | 0.97   | 2.28    | 0.70   | 5.61   | 2.73   | 0.47   | 0.21   | 0.95   | 1.08   |
| 1478 | 510 | 25 | G | -1.05  | 0.90   | 1.61   | 0.54   | 0.11   | 1.44   | 1.59   | 0.49   | 1.41   | 2.39   | 0.26   | -0.21  | 0.37   | 1.92   | 4.27   | 0.90   | 4.99    | 1.42   | 14.84  | 2.79   | -0.15  | 3.89   | 1.97   | 6.62   |
| 1479 | 510 | 25 | B | 0.74   | -3.88  | 0.85   | -0.94  | 0.73   | 1.10   | -1.49  | 0.21   | 3.39   | -0.76  | 3.56   | -1.97  | -0.29  | 1.21   | 8.06   | -0.12  | 6.11    | 2.68   | 23.68  | 6.46   | -0.31  | 4.75   | 0.10   | -1.46  |
| 1480 | 510 | 26 | R | 0.31   | -3.59  | 1.14   | 0.77   | -0.71  | -13.99 | -9.74  | 0.51   | 0.61   | -11.36 | -17.86 | 0.66   | -0.91  | -10.03 | 9.80   | 11.72  | 9.92    | 9.33   | 8.98   | 3.37   | 7.33   | 10.34  | 9.95   | 9.30   |
| 1481 | 510 | 26 | G | 0.41   | -5.22  | 1.67   | 1.82   | -2.20  | -18.14 | -14.75 | 0.76   | 1.58   | -14.20 | -24.38 | -0.39  | -11.99 | -13.19 | 10.89  | 11.24  | 11.70   | 9.53   | 10.37  | 10.25  | 8.83   | 10.74  | 4.75   | 8.37   |
| 1482 | 510 | 26 | B | 2.63   | -2.18  | 1.54   | 0.91   | 1.01   | -1.95  | -2.07  | 1.05   | 0.08   | -0.93  | -33.96 | 1.43   | -3.57  | -1.19  | -6.09  | -8.13  | -6.61   | -5.30  | -6.22  | -6.26  | -5.17  | -4.70  | -4.73  | -5.46  |
| 1483 | 510 | 27 | R | -1.19  | -2.63  | 2.26   | 1.89   | 2.01   | -2.78  | -1.65  | 1.89   | -0.08  | -1.08  | 3.38   | -0.73  | -2.29  | -3.68  | -1.66  | -0.74  | 1.66    | 1.06   | -0.21  | 0.46   | -2.05  | 1.58   | -0.95  | 0.56   |
| 1484 | 510 | 27 | G | -1.11  | 0.79   | 3.29   | 1.99   | 0.68   | 0.34   | 1.32   | 1.08   | 2.66   | 1.42   | 1.83   | -0.06  | 0.67   | 0.46   | -3.30  | -1.06  | -0.82   | -2.29  | -0.19  | -0.30  | -1.97  | 0.12   | -1.39  | -0.56  |
| 1485 | 510 | 27 | B | 1.01   | -0.81  | 1.00   | 0.83   | 1.84   | 0.70   | 1.27   | -1.09  | 3.35   | 0.92   | 1.64   | 0.97   | 2.52   | 3.20   | 2.68   | 0.64   | 1.58    | 1.99   | 2.47   | 2.16   | 1.91   | 2.63   | 3.01   | -1.16  |
| 1486 | 510 | 28 | R | 0.93   | -4.23  | 4.13   | 0.31   | -1.93  | -3.68  | -7.12  | -0.20  | 2.36   | -2.51  | 5.13   | -2.66  | -12.29 | -9.84  | 17.85  | 23.53  | 23.30</ |        |        |        |        |        |        |        |



|      |     |    |   |        |        |        |        |        |        |        |        |        |        |        |        |        |        |        |        |        |        |        |        |        |        |        |        |
|------|-----|----|---|--------|--------|--------|--------|--------|--------|--------|--------|--------|--------|--------|--------|--------|--------|--------|--------|--------|--------|--------|--------|--------|--------|--------|--------|
| 1549 | 540 | 13 | R | 2.99   | 3.52   | 6.05   | 4.72   | 4.11   | 3.70   | 4.36   | 2.83   | 5.62   | 5.45   | 0.46   | 2.41   | 3.60   | 9.96   | 2.37   | 2.45   | 3.03   | 1.14   | 1.72   | 0.62   | 1.96   | 1.83   | 1.68   | 1.22   |
| 1550 | 540 | 13 | G | 3.43   | 2.69   | 6.34   | 3.68   | 4.77   | 3.65   | 5.49   | 3.15   | 3.97   | 6.73   | -0.48  | 2.90   | 3.24   | 6.34   | 0.93   | 2.63   | 3.03   | 1.54   | 2.01   | 2.08   | 1.81   | 2.86   | 1.53   | 1.70   |
| 1551 | 540 | 13 | B | 1.70   | 1.76   | 5.83   | 1.69   | 3.78   | 3.78   | 5.00   | 1.69   | 4.32   | 4.48   | 0.18   | 1.23   | 4.74   | 2.49   | 0.39   | 0.52   | 2.41   | 1.33   | 1.28   | 1.40   | 1.43   | 0.92   | 0.11   | 0.47   |
| 1552 | 540 | 14 | R | -0.39  | -3.05  | 3.94   | 0.26   | 1.35   | -3.81  | -3.39  | 1.04   | 1.44   | -4.96  | 3.24   | 0.32   | -0.93  | -1.04  | -0.38  | -1.12  | 0.21   | -0.15  | -0.37  | -0.52  | -1.12  | 0.99   | -3.74  | -2.29  |
| 1553 | 540 | 14 | G | 0.46   | -1.00  | 3.98   | 2.06   | 0.77   | -1.23  | -0.05  | 0.57   | 2.06   | 1.72   | 3.33   | -0.13  | -1.02  | 1.51   | -0.50  | -0.75  | 0.83   | -1.14  | -0.42  | -0.35  | -0.46  | -1.14  | -1.89  | -0.85  |
| 1554 | 540 | 14 | B | -0.23  | 1.98   | 2.62   | 1.21   | 1.18   | 4.10   | 4.90   | 1.16   | 3.98   | 5.47   | 2.24   | 1.01   | 3.41   | 8.10   | 2.47   | 2.00   | 1.71   | 1.21   | 0.84   | 0.57   | 2.44   | 2.48   | 3.80   | 0.85   |
| 1555 | 540 | 15 | R | 3.30   | 2.42   | 8.89   | 4.57   | 4.24   | 1.11   | 7.57   | 3.18   | 5.10   | 3.24   | 2.07   | 3.03   | 6.08   | 4.30   | -2.41  | -1.32  | -1.95  | -2.75  | -1.08  | -0.42  | -1.73  | -1.84  | -2.42  | -2.68  |
| 1556 | 540 | 15 | G | 1.17   | 1.08   | 2.82   | 1.28   | 1.02   | 1.72   | 7.18   | 0.70   | 1.41   | 5.42   | 3.04   | 0.46   | 3.17   | 6.57   | 1.62   | 1.72   | 2.92   | 2.10   | 2.39   | 1.76   | 2.32   | 2.49   | 2.95   | 1.80   |
| 1557 | 540 | 15 | B | 0.44   | -1.35  | 1.50   | -0.45  | -1.06  | -3.13  | 3.32   | -1.97  | -1.08  | -0.52  | 3.14   | -0.85  | -0.36  | -1.26  | 0.26   | 0.93   | 1.21   | -0.19  | -1.39  | -0.71  | 2.70   | 1.27   | 1.38   | -2.55  |
| 1558 | 540 | 16 | R | 2.24   | -7.37  | 3.95   | 1.83   | 0.98   | -4.08  | -3.15  | -2.51  | 2.03   | -10.22 | 6.66   | 2.98   | -10.50 | -3.84  | 13.60  | 8.44   | 12.80  | 11.18  | 13.83  | 12.43  | 9.74   | 13.21  | 9.22   | 13.47  |
| 1559 | 540 | 16 | G | 1.82   | -3.97  | 2.44   | 0.76   | 1.26   | -2.45  | -2.85  | -1.92  | 1.48   | -12.83 | 2.22   | 2.04   | -13.84 | -3.26  | 15.23  | 11.19  | 14.11  | 13.60  | 14.42  | 13.32  | 12.49  | 14.87  | 5.72   | 14.46  |
| 1560 | 540 | 16 | B | 1.56   | -7.83  | 0.97   | 1.08   | 0.70   | -6.84  | -4.07  | 0.71   | -1.90  | -13.01 | 0.00   | 3.50   | -9.28  | -6.64  | -32.25 | -31.52 | -34.73 | -33.12 | -35.49 | -33.42 | -31.54 | -35.94 | -44.20 | -32.43 |
| 1561 | 540 | 17 | R | 4.10   | 1.63   | 9.74   | 5.77   | 3.22   | 2.79   | 7.53   | 6.25   | 5.86   | 5.79   | 4.13   | 2.32   | 7.24   | 7.05   | -12.07 | -17.43 | -13.48 | -13.84 | -13.99 | -12.92 | -14.24 | -15.36 | -17.15 | -20.22 |
| 1562 | 540 | 17 | G | 5.28   | 5.13   | 9.80   | 10.41  | 10.38  | 8.61   | 13.88  | 11.58  | 7.08   | 9.16   | 7.30   | 9.25   | 10.23  | 16.24  | -18.04 | -30.46 | -21.64 | -19.78 | -20.41 | -16.82 | -23.53 | -23.48 | -26.14 | -33.03 |
| 1563 | 540 | 17 | B | 1.92   | -1.18  | 3.49   | 3.54   | 1.12   | -0.08  | 3.45   | 2.20   | 5.96   | 2.97   | 3.54   | 1.70   | -4.97  | 7.11   | -1.87  | 0.24   | 1.31   | -3.19  | 0.31   | -1.19  | -2.09  | -1.09  | -2.00  | 0.51   |
| 1564 | 540 | 18 | R | -26.10 | -26.96 | -25.19 | -24.00 | -21.72 | -25.41 | -24.04 | -26.62 | -26.41 | -23.23 | 3.07   | -22.31 | -24.35 | -22.26 | -22.82 | -24.30 | -27.35 | -28.12 | -27.48 | -29.14 | -28.73 | -29.12 | -23.96 | -26.61 |
| 1565 | 540 | 18 | G | 2.61   | 1.90   | 3.90   | 2.58   | 2.08   | 1.58   | 3.18   | 3.46   | 2.11   | 3.56   | 5.93   | 0.26   | 1.19   | 4.41   | 1.93   | 1.72   | 2.26   | 1.97   | 2.42   | 3.94   | 3.06   | 2.91   | 2.13   | 1.15   |
| 1566 | 540 | 18 | B | 4.80   | 2.71   | 4.56   | 2.82   | 3.62   | 3.50   | 3.50   | 3.05   | 4.57   | 3.46   | 5.36   | 1.97   | 4.31   | 5.95   | 5.13   | 5.64   | 8.85   | 6.16   | 8.12   | 8.49   | 7.29   | 7.84   | 2.97   | 6.05   |
| 1567 | 540 | 19 | R | -0.65  | -2.54  | 2.64   | -0.28  | -0.33  | -2.34  | 3.24   | -0.10  | -0.53  | 1.82   | -4.86  | -0.94  | -1.25  | -1.04  | -1.26  | 0.64   | 0.39   | -1.38  | -0.86  | -0.61  | -0.43  | 0.25   | -1.60  | -1.95  |
| 1568 | 540 | 19 | G | -1.29  | -1.57  | 1.31   | -0.80  | -0.95  | -1.41  | -1.27  | -1.46  | -0.79  | 0.36   | -5.28  | -0.92  | -1.85  | 2.59   | 0.34   | -1.22  | -0.80  | -0.72  | 0.32   | -0.06  | -1.10  | -0.77  | -0.62  | -0.90  |
| 1569 | 540 | 19 | B | 1.30   | -0.36  | 1.37   | -0.46  | 1.82   | 2.52   | 3.37   | 0.31   | 3.10   | 3.20   | 4.88   | 1.51   | 1.78   | 7.54   | 0.59   | 2.41   | 1.34   | 1.49   | 0.43   | 2.35   | 1.00   | 2.49   | 0.26   | 0.45   |
| 1570 | 540 | 20 | R | -2.47  | -7.83  | 2.62   | -9.77  | -6.11  | 2.34   | 5.03   | -7.70  | -0.45  | -13.75 | 0.53   | -4.49  | -5.32  | 12.32  | 1.87   | 3.70   | 2.34   | 1.95   | 10.75  | 0.03   | -4.15  | 1.53   | -9.77  | -5.32  |
| 1571 | 540 | 20 | G | -4.24  | -13.61 | 1.99   | -15.44 | -6.14  | 2.89   | -2.93  | -15.23 | -1.90  | -14.76 | -0.91  | -9.34  | -1.12  | 10.47  | 3.54   | 8.50   | 3.80   | 2.97   | 13.53  | 1.85   | -3.24  | 3.85   | -13.13 | -6.94  |
| 1572 | 540 | 20 | B | -4.19  | -23.98 | 3.12   | -24.28 | -8.81  | -2.37  | -10.15 | -24.98 | -2.33  | -18.75 | 5.72   | -13.56 | 2.66   | 8.97   | 3.59   | 19.23  | 7.46   | 5.82   | 17.45  | 2.43   | -1.51  | 7.04   | -14.45 | -7.72  |
| 1573 | 540 | 21 | R | 2.41   | -5.47  | 5.74   | -0.48  | 0.03   | -10.54 | -12.99 | 3.88   | 2.48   | -11.50 | -0.83  | 1.21   | -5.82  | -3.26  | 3.43   | 4.69   | 4.48   | 2.12   | 2.32   | 5.43   | 2.65   | 4.96   | -1.07  | 2.57   |
| 1574 | 540 | 21 | G | 4.57   | -8.62  | 7.96   | 0.97   | 0.17   | -16.03 | -17.59 | 5.16   | 1.60   | -13.67 | -8.66  | 1.85   | -9.07  | -5.74  | 4.47   | 4.37   | 6.21   | 5.23   | 4.85   | 6.92   | 5.52   | 5.30   | -1.07  | 2.86   |
| 1575 | 540 | 21 | B | 1.26   | -3.76  | 3.37   | -0.41  | -1.51  | -6.95  | -5.45  | -1.58  | -1.19  | -3.48  | 0.26   | 0.23   | -4.86  | -7.63  | -13.77 | -11.64 | -11.40 | -11.95 | -12.30 | -12.42 | -12.01 | -11.60 | -13.05 | -9.76  |
| 1576 | 540 | 22 | R | 1.35   | -4.72  | 5.21   | 0.50   | -1.17  | -3.14  | -3.83  | -1.29  | 0.75   | 0.41   | 0.63   | -0.88  | -7.11  | -4.11  | 2.46   | 5.75   | 3.98   | 3.86   | 2.88   | 2.54   | 2.87   | 4.50   | 1.02   | 5.70   |
| 1577 | 540 | 22 | G | 3.36   | -1.10  | 6.40   | -3.85  | -3.81  | -12.35 | -18.88 | 6.01   | 0.24   | -17.75 | 0.72   | -3.23  | -19.79 | -15.38 | 47.98  | 56.58  | 52.50  | 48.21  | 49.88  | 44.47  | 51.83  | 51.24  | 52.38  | 58.47  |
| 1578 | 540 | 22 | B | 0.70   | 2.23   | 0.80   | 0.93   | 1.50   | -0.07  | 0.55   | -2.04  | 0.74   | -1.74  | 4.99   | 2.34   | -7.34  | 1.07   | -2.17  | -2.58  | 1.16   | 0.65   | -1.89  | -1.89  | -1.34  | 1.14   | -0.01  | -0.12  |
| 1579 | 540 | 23 | R | -1.46  | 4.44   | 0.46   | 2.52   | 3.08   | 7.30   | 7.78   | 0.49   | 2.30   | 9.21   | 2.12   | 2.62   | 7.31   | 16.31  | -4.82  | -3.70  | -5.08  | -4.02  | -5.37  | -4.04  | -3.97  | -2.75  | -4.51  | -5.44  |
| 1580 | 540 | 23 | G | -0.16  | 4.16   | 0.13   | 2.64   | 4.10   | 5.54   | 7.53   | 1.66   | 1.86   | 8.60   | 1.24   | 1.09   | 5.55   | 9.68   | -5.25  | -7.35  | -7.04  | -5.43  | -6.01  | -4.87  | -6.32  | -5.54  | -6.87  | -8.62  |
| 1581 | 540 | 23 | B | 0.04   | 1.85   | 7.48   | 1.18   | 1.43   | 1.64   | 3.49   | -0.67  | 3.00   | 6.49   | 3.54   | 0.80   | 2.62   | 5.43   | 3.00   | -3.97  | -2.24  | -2.06  | -4.40  | -1.63  | -1.76  | -3.08  | -3.07  | -3.40  |
| 1582 | 540 | 24 | R | 3.20   | 3.39   | 5.35   | 3.98   | 3.05   | -4.05  | -0.15  | 4.38   | 3.39   | 1.64   | -2.28  | 1.77   | -3.45  | 1.54   | 2.01   | 3.09   | 5.41   | 7.37   | 3.66   | 2.26   | 5.10   | 1.53   | 1.22   | 1.62   |
| 1583 | 540 | 24 | G | 6.87   | 3.28   | 5.50   | 8.05   | 4.30   | -7.50  | -2.48  | 9.25   | 6.81   | 3.96   | 2.76   | 4.57   | 1.98   | -2.46  | 6.09   | 3.78   | 9.84   | 14.31  | 18.67  | 10.32  | 6.65   | 11.34  | 5.70   | 4.62   |
| 1584 | 540 | 24 | B | 4.20   | -3.80  | 1.01   | 1.61   | 0.34   | -6.29  | -4.32  | 4.79   | 1.14   | -1.02  | 6.34   | 0.44   | -5.12  | -0.90  | -0.97  | -1.32  | -0.41  | -0.82  | -1.09  | -1.21  | -0.45  | -1.44  | -3.90  | -2.11  |
| 1585 | 540 | 25 | R | 1.39   | -1.43  | 3.21   | 0.83   | 1.28   | 1.94   | 2.25   | 1.11   | 1.83   | 1.51   | -19.22 | 1.14   | 1.86   | 2.62   | 1.77   | 1.80   | 2.01   | 0.50   | 5.43   | 1.88   | 3.09   | 0.76   | 0.09   | 0.22   |
| 1586 | 540 | 25 | G | -0.08  | -1.10  | 2.28   | 0.38   | 0.67   | -0.66  | 1.83   | 0.39   | 1.98   | 2.83   | 1.12   | -0.57  | 0.51   | 1.44   | 4.61   | 0.81   | 4.64   | 1.94   | 14.20  | 2.95   | -0.03  | 3.70   | 0.83   | -0.39  |
| 1587 | 540 | 25 | B | 0.98   | -4.55  | -0.48  | -0.24  | 0.94   | 0.86   | -0.27  | -0.49  | 3.03   | -1.38  | 4.77   | -1.30  | -0.23  | 0.88   | 7.95   | 0.44   | 7.08   | 1.94   | 23.52  | 6.51   | 0.41   | 4.94   | -0.72  | -1.82  |
| 1588 | 540 | 26 | R | 0.85   | -4.72  | 1.92   | -0.76  | -0.77  | -14.08 | -9.90  | 0.29   | 0.47   | -11.74 | -17.30 | -0.44  | -9.40  | -10.81 | 8.01   | 7.83   | 7.83   | 7.19   | 7.96   | 6.99   | 6.08   | 7.76   | 1.84   | 6.01   |
| 1589 | 540 | 26 | G | 2.12   | -6.74  | 2.60   | 0.61   | -2.60  | -19.42 | -14.15 | 0.84   | 1.42   | -13.74 | -23.85 | -0.31  | -12.12 | -12.34 | 9.01   | 8.61   | 9.13   | 8.19   | 8.44   | 8.26   | 6.45   | 7.68   | 1.42   | 5.24   |
| 1590 | 540 | 26 | B | 1.89   | -1.86  | 2.20   | 0.63   | 1.71   | -2.82  | -1.39  | 1.57   | 0.20   | -0.43  | -35.15 | 1.18   | -3.12  | -1.49  | -5.81  | -5.34  | -2.97  | -4.19  | -4.46  | -5.59  | -2.84  | -3.77  | -3.05  | -4.14  |
| 1591 | 540 | 27 | R | 0.30   | -3.44  | 3.41   | 1.86   | 0.51   | -4.41  | -1.80  | 1.60   | 1.50   | -0.43  | 3.99   | -1.08  | -1.85  | -3.39  | -0.04  | -5.59  | 0.32   | 0.90   | -0.68  | 0.69   | -2.10  | -0.03  | -2.80  | -1.44  |
| 1592 | 540 | 27 | G | 0.92   | -1.26  | 4.81   | 2.12   | 1.32   | -1.86  | 1.00   | 0.81   | 2.06   | 1.97   | 3.03   | -0.27  | 0.80   | -0.17  | -1.45  | -0.69  | 0.42   | -1.15  | -0.09  | -0.58  | -0.78  | -0.11  | -1.24  | -1.48  |
| 1593 | 540 | 27 | B | -0.40  | -0.61  | 1.27   | 0.21   | 2.29   | 0.21   | 2.10   | -0.82  | 2.64   | 2.05   | 3.28   | 1.73   | 2.84   | 1.80   | 1.30   | 0.72   | 0.96   | 0.53   | 1.79   | 2.17   | 1.25   | 1.81   | 2.31   | -1.24  |
| 1594 | 540 | 28 | R | 2.47   | -4.85  | 4.66   | 0.65   | 0.03   | -5.55  | -6.71  | -0.78  | 1.98   | -0.70  | 8.27   | -1.85  | -11.16 | -11.47 | 16.84  | 20.63  | 21.80  | 19.60  | 22.46  | 21.04  | 17.30  | 21.22  | 20.83  | 23.00  |
| 1595 | 540 | 28 | G | 3.46   | -5.97  | 5.61   | -0.89  | 1.43   | -10.61 | -12.07 | -2.48  | 6.80   | -10.03 | 13.43  | -1.07  | -19.64 | -15.12 | 55.14  | 47.49  | 59.12  | 53.14  | 55.21  | 50.25  | 51.88  | 58.54  | 50.21  | 49.06  |
| 1596 | 540 | 28 | B | -1.36  | -5.08  | 4.01   | 2.37   | 3.72   | -6.32  | -9.99  | 4.08   | -1.73  | -8.54  | 0.15   | 4.57   | -21.37 | -14.01 | -19.28 | -22.34 | -20.03 | -18.18 | -21.81 | -20.25 | -20.06 | -23.26 | -23.77 | -23.37 |
| 1597 | 540 | 29 | R | -0.03  | -13.54 | 2.66   | -9.00  | -9.09  | -10.19 | -18.02 | -13.07 | -2.14  | -10.63 | 1.83   | -4.91  | -3.23  | -6.5   |        |        |        |        |        |        |        |        |        |        |

|      |     |    |   |        |        |        |        |        |        |        |        |        |        |        |        |        |        |        |        |        |        |        |        |        |        |        |        |       |      |
|------|-----|----|---|--------|--------|--------|--------|--------|--------|--------|--------|--------|--------|--------|--------|--------|--------|--------|--------|--------|--------|--------|--------|--------|--------|--------|--------|-------|------|
| 1660 | 570 | 14 | R | -0.74  | -4.98  | 2.10   | 0.41   | -0.32  | -2.69  | -2.63  | 1.26   | 0.39   | -6.70  | 1.86   | -0.06  | -0.32  | -1.60  | -1.07  | -1.17  | 0.44   | 0.08   | 0.24   | 0.27   | -1.42  | 0.67   | -5.30  | -4.82  |       |      |
| 1661 | 570 | 14 | G | -0.64  | -2.57  | 2.08   | 1.69   | 2.21   | -1.17  | 0.44   | 0.77   | 2.00   | -0.43  | 2.65   | -0.80  | 0.02   | 1.45   | -1.79  | 0.66   | 1.59   | -0.52  | 1.53   | 0.99   | -0.21  | 0.85   | -2.32  | -1.34  |       |      |
| 1662 | 570 | 14 | B | 0.55   | 2.53   | 2.90   | 1.79   | 2.60   | 4.12   | 4.52   | 1.47   | 3.71   | 5.56   | -0.16  | 1.99   | 4.11   | 9.61   | 3.26   | 1.94   | 2.46   | 1.07   | 2.18   | 1.00   | 1.95   | 2.09   | 4.06   | -0.42  |       |      |
| 1663 | 570 | 15 | R | 1.73   | 0.68   | 7.09   | 4.55   | 3.60   | 1.62   | 7.68   | 3.70   | 4.97   | 0.75   | 1.52   | 2.58   | 6.23   | 4.26   | -2.26  | -1.05  | 0.29   | -2.15  | 0.61   | -0.03  | -1.10  | 1.15   | -2.72  | -2.84  |       |      |
| 1664 | 570 | 15 | G | 0.32   | 0.33   | 0.99   | 0.93   | 2.03   | 2.11   | 7.33   | 0.22   | 2.04   | 3.51   | 2.60   | -0.16  | 4.59   | 6.09   | 1.49   | 2.12   | 2.63   | 2.44   | 1.74   | 2.11   | 3.18   | 2.61   | 2.29   | 0.59   |       |      |
| 1665 | 570 | 15 | B | -1.78  | -1.76  | 0.66   | -0.62  | -0.41  | -1.73  | 2.28   | 2.17   | -0.90  | -2.48  | 1.82   | -0.20  | -0.38  | -1.70  | 0.70   | -0.19  | 2.53   | 0.66   | -0.64  | 0.01   | 1.31   | 0.79   | 0.70   | -3.19  |       |      |
| 1666 | 570 | 16 | R | 0.34   | -8.41  | 3.41   | 1.82   | 0.06   | -0.65  | -3.40  | -1.78  | 0.59   | -12.46 | 5.37   | 0.90   | -10.21 | -3.61  | 11.47  | 7.45   | 10.86  | 10.14  | 11.20  | 10.50  | 8.06   | 12.53  | 5.15   | 11.61  |       |      |
| 1667 | 570 | 16 | G | 1.43   | -4.74  | 2.22   | -0.30  | 2.01   | 2.00   | -2.38  | -1.51  | 2.30   | -13.41 | 1.08   | 1.01   | -13.63 | -2.73  | 11.76  | 8.82   | 12.54  | 11.83  | 13.92  | 12.39  | 12.17  | 12.79  | 2.96   | 13.27  |       |      |
| 1668 | 570 | 16 | B | 1.73   | -8.93  | 2.32   | 1.55   | 2.25   | -4.22  | -3.18  | 2.14   | -1.15  | -13.68 | -0.45  | 2.10   | -9.50  | -6.20  | -28.59 | -27.51 | -32.83 | -30.72 | -32.39 | -30.14 | -27.52 | -32.48 | 4.46   | -28.21 |       |      |
| 1669 | 570 | 17 | R | 2.72   | 0.06   | 7.45   | 5.67   | 3.91   | 2.93   | 7.58   | 6.29   | 4.59   | 3.88   | 2.58   | 1.93   | 7.46   | 8.34   | -11.73 | -16.45 | -12.37 | -11.97 | -11.12 | -10.81 | -12.64 | -14.21 | -17.04 | -21.00 |       |      |
| 1670 | 570 | 17 | G | 4.25   | 4.54   | 9.14   | 10.23  | 10.01  | 9.68   | 14.20  | 12.32  | 7.70   | 9.40   | 6.40   | 9.08   | 11.03  | 16.98  | -16.61 | -28.29 | -20.00 | -18.61 | -19.82 | -15.94 | -22.49 | -23.63 | -24.49 | -31.85 |       |      |
| 1671 | 570 | 17 | B | 2.51   | -0.25  | 3.82   | 2.43   | 1.33   | -0.75  | 4.36   | 2.30   | 6.86   | 1.74   | 4.91   | 2.70   | -3.74  | 7.50   | -1.50  | 0.81   | 1.47   | -2.49  | -1.94  | 0.53   | -1.69  | -1.65  | -1.76  | 0.11   |       |      |
| 1672 | 570 | 18 | R | -28.19 | -29.21 | -27.77 | -25.06 | -24.45 | -26.77 | -26.16 | -26.48 | -27.77 | -26.74 | 1.92   | -23.51 | -25.56 | -23.30 | -24.03 | -26.06 | -27.61 | -28.61 | -28.95 | -30.89 | -30.22 | -30.11 | -25.85 | -29.17 |       |      |
| 1673 | 570 | 18 | G | 1.32   | 1.77   | 2.56   | 2.29   | 1.73   | 2.50   | 3.88   | 3.77   | 1.91   | 2.78   | 4.94   | -0.45  | 2.18   | 5.17   | 0.92   | 1.85   | 2.23   | 1.95   | 3.32   | 4.75   | 2.82   | 3.61   | 1.57   | 1.22   |       |      |
| 1674 | 570 | 18 | B | 4.83   | 3.57   | 4.95   | 1.53   | 3.18   | 4.02   | 3.60   | 4.16   | 4.88   | 2.71   | 4.90   | 0.63   | 5.15   | 5.57   | 5.72   | 5.87   | 9.49   | 6.21   | 7.74   | 8.81   | 7.87   | 9.07   | 2.85   | 6.36   |       |      |
| 1675 | 570 | 19 | R | -2.35  | -4.59  | 0.75   | 0.26   | 0.18   | -1.01  | 1.71   | 0.64   | -0.83  | -2.21  | -6.86  | -1.54  | -0.98  | -1.01  | -0.66  | -1.60  | 0.79   | -1.82  | 0.47   | 0.25   | -0.65  | 1.05   | -2.49  | -3.20  |       |      |
| 1676 | 570 | 19 | G | -2.43  | -2.72  | -0.70  | -0.61  | -0.83  | -1.81  | -0.56  | 1.37   | -1.16  | -0.52  | -6.97  | -1.44  | -0.69  | 3.28   | -1.19  | -1.58  | 0.34   | -0.69  | -0.35  | 0.42   | -1.08  | 0.05   | -1.72  | -1.62  |       |      |
| 1677 | 570 | 19 | B | 2.06   | -1.02  | 0.92   | -0.64  | 1.82   | 2.83   | 3.59   | 0.76   | 3.56   | 2.14   | 4.45   | 1.44   | 1.72   | 7.31   | 2.30   | 3.19   | 1.51   | 1.34   | 0.83   | 2.77   | 0.94   | 0.87   | -1.14  | -0.42  |       |      |
| 1678 | 570 | 20 | R | -5.39  | -10.97 | 0.92   | -10.68 | -6.88  | 4.16   | 4.51   | -7.88  | -1.47  | -16.41 | -0.98  | -3.97  | -3.48  | 9.74   | 2.28   | 4.73   | 2.51   | 1.84   | 7.02   | 0.27   | -5.63  | 2.27   | -11.23 | -6.38  |       |      |
| 1679 | 570 | 20 | G | -4.88  | -16.34 | 1.05   | -16.17 | -6.29  | 1.92   | -3.04  | -15.58 | -1.40  | -18.18 | -1.22  | -7.12  | 0.01   | 5.99   | 2.33   | 10.54  | 4.05   | 3.77   | 10.39  | 2.18   | -4.19  | 5.18   | -13.15 | -7.65  |       |      |
| 1680 | 570 | 20 | B | -4.78  | -27.44 | 1.11   | -25.57 | -8.47  | -1.50  | -11.80 | -28.04 | 0.11   | -22.97 | 7.34   | -11.52 | 2.10   | 4.76   | 4.04   | 18.55  | 7.74   | 5.99   | 13.39  | 3.22   | -2.09  | 8.49   | -14.35 | -7.57  |       |      |
| 1681 | 570 | 21 | R | 2.54   | -6.08  | 4.52   | 0.40   | -1.67  | -11.05 | -13.20 | 4.10   | 2.03   | -12.07 | -3.19  | 1.99   | 0.55   | -6.26  | -3.22  | 4.64   | 1.22   | 3.26   | 3.94   | 2.24   | 3.52   | 4.04   | 2.67   | 4.47   | -3.10 | 0.59 |
| 1682 | 570 | 21 | G | 4.56   | -8.58  | 7.33   | 0.38   | -0.56  | -15.71 | -18.35 | 5.16   | 2.33   | -13.82 | -9.30  | 1.36   | -10.02 | -5.51  | 3.85   | 3.06   | 5.22   | 4.28   | 3.92   | 6.86   | 4.45   | 5.27   | -3.24  | 0.96   |       |      |
| 1683 | 570 | 21 | B | -0.86  | -4.48  | 3.77   | -0.24  | -1.43  | -5.89  | -6.10  | 0.05   | -1.23  | -3.91  | -0.44  | -0.06  | -4.06  | -6.37  | -9.80  | -7.74  | -7.76  | -8.46  | -9.42  | -7.73  | -7.25  | -9.16  | -1.01  | -5.42  |       |      |
| 1684 | 570 | 22 | R | -1.12  | -5.90  | 3.07   | 0.35   | -1.79  | -2.49  | -3.85  | 0.37   | 0.82   | -1.86  | 1.07   | -2.14  | -6.68  | -3.96  | 2.87   | 6.04   | 4.07   | 4.75   | 4.02   | 3.54   | 3.46   | 4.31   | -0.60  | 3.88   |       |      |
| 1685 | 570 | 22 | G | 2.34   | -1.11  | 3.35   | -4.74  | -3.50  | -11.86 | -10.17 | -7.27  | 0.56   | -18.37 | -0.16  | -4.43  | -21.57 | -15.37 | 44.11  | 51.06  | 48.85  | 45.31  | 46.94  | 40.59  | 47.11  | 50.32  | 48.19  | 52.44  |       |      |
| 1686 | 570 | 22 | B | -0.16  | 3.36   | -0.09  | -0.59  | 0.71   | -0.02  | -0.38  | -1.78  | 0.92   | -2.57  | 5.76   | 0.67   | -8.12  | -0.20  | -1.40  | -3.14  | 1.58   | -0.50  | -3.24  | -4.33  | -0.33  | 0.96   | -0.93  | 1.28   |       |      |
| 1687 | 570 | 23 | R | -1.72  | 3.73   | -0.68  | 2.56   | 2.66   | 7.89   | 8.14   | 0.50   | 0.44   | 8.36   | 0.56   | 2.04   | 6.72   | 16.71  | -5.08  | -4.44  | -4.63  | -1.57  | -4.72  | -3.81  | -2.83  | -3.74  | -3.16  | -6.07  |       |      |
| 1688 | 570 | 23 | G | -1.30  | 3.74   | -0.53  | 2.54   | 3.72   | 5.89   | 6.96   | 1.78   | 2.14   | 7.23   | -0.45  | 1.52   | 5.97   | 10.25  | -4.85  | -5.87  | -5.82  | -5.34  | -5.39  | -3.37  | -5.40  | -3.93  | -6.20  | -8.97  |       |      |
| 1689 | 570 | 23 | B | 0.10   | 1.84   | 5.99   | 1.65   | 2.35   | 4.33   | 3.81   | 1.40   | 3.47   | 5.46   | 0.74   | -0.64  | 1.92   | 6.06   | 2.26   | -3.13  | -1.15  | -2.61  | -3.32  | -1.83  | -0.79  | -1.87  | -3.28  | -4.37  |       |      |
| 1690 | 570 | 24 | R | 1.83   | -1.08  | 1.02   | 4.08   | 2.57   | -4.56  | -1.48  | 4.19   | 2.77   | -0.12  | -3.29  | 0.65   | 1.67   | -2.85  | 1.02   | 1.27   | 4.23   | 4.99   | 7.05   | 4.42   | 3.47   | 5.34   | -0.03  | -1.66  |       |      |
| 1691 | 570 | 24 | G | 5.60   | 1.92   | 3.79   | 7.55   | 4.38   | -5.76  | -2.15  | 9.36   | 6.77   | 2.17   | 3.01   | 4.26   | 2.92   | -2.11  | 5.28   | 4.08   | 9.70   | 13.86  | 19.11  | 10.44  | 7.94   | 11.59  | 3.87   | 2.06   |       |      |
| 1692 | 570 | 24 | B | 5.71   | -3.46  | 2.39   | 2.88   | 0.04   | -5.71  | -5.14  | 5.27   | 1.36   | -0.84  | 6.87   | 1.80   | -6.34  | -1.32  | -0.51  | -1.02  | -0.66  | -0.22  | -2.14  | -0.90  | -1.78  | -1.79  | -4.74  | -3.70  |       |      |
| 1693 | 570 | 25 | R | 0.31   | -2.78  | 0.24   | 0.92   | 1.11   | 2.15   | 1.86   | 1.12   | 0.87   | -0.57  | -21.90 | 0.47   | 2.36   | 2.55   | 0.70   | 1.47   | 2.43   | 0.58   | 5.61   | 2.03   | 0.05   | 0.83   | -0.78  | -0.63  |       |      |
| 1694 | 570 | 25 | G | -0.99  | -3.10  | 0.94   | 0.17   | 0.91   | -0.05  | 1.70   | 0.47   | 2.13   | 0.31   | 0.90   | -1.06  | 0.83   | 1.70   | 3.83   | 1.12   | 4.94   | 2.29   | 15.19  | 4.20   | 0.62   | 4.07   | -0.31  | -1.41  |       |      |
| 1695 | 570 | 25 | B | 1.08   | -5.23  | -1.55  | -1.23  | -0.01  | 1.48   | -2.12  | -0.89  | 2.28   | -2.33  | 3.74   | -0.36  | -1.59  | 0.21   | 8.66   | 3.00   | 7.31   | 3.15   | 23.12  | 6.34   | -0.51  | 3.98   | -1.53  | -2.18  |       |      |
| 1696 | 570 | 26 | R | -1.52  | -5.85  | 1.24   | -0.63  | -0.20  | -13.90 | -10.10 | 1.08   | 0.26   | -13.62 | -19.92 | -0.56  | -8.31  | -12.83 | 4.92   | 5.26   | 5.81   | 5.68   | 5.69   | 5.60   | 4.19   | 5.88   | -1.27  | 2.73   |       |      |
| 1697 | 570 | 26 | G | 0.29   | -8.26  | 1.81   | 0.66   | -1.95  | -19.44 | -14.55 | 1.06   | 1.12   | -14.94 | -27.11 | -0.08  | -11.36 | -15.63 | 5.68   | 6.08   | 7.81   | 6.71   | 5.50   | 7.24   | 3.70   | 6.64   | -1.91  | 2.10   |       |      |
| 1698 | 570 | 26 | B | 1.59   | -1.54  | 1.97   | 0.99   | 1.50   | -1.19  | -1.32  | 1.64   | 1.17   | -1.31  | -37.94 | 2.00   | -1.74  | -0.56  | -4.46  | -3.61  | -3.19  | -1.95  | -2.61  | -3.51  | -1.64  | -3.82  | -1.37  | -2.83  |       |      |
| 1699 | 570 | 27 | R | -0.78  | -4.26  | 2.21   | 1.91   | 1.97   | -4.09  | -0.65  | 1.25   | 0.97   | -2.87  | 2.79   | -2.10  | -0.32  | -3.33  | -0.57  | -0.77  | 0.81   | 1.06   | 0.84   | 1.23   | -1.17  | 0.64   | -4.65  | -3.45  |       |      |
| 1700 | 570 | 27 | G | -0.75  | -3.30  | 3.28   | 1.35   | 0.92   | -1.70  | 1.14   | 1.12   | 2.34   | 0.69   | 2.34   | -0.45  | 0.88   | 0.21   | -2.03  | 0.63   | 0.83   | -0.51  | 0.99   | 0.41   | -0.25  | 1.01   | -1.10  | -2.40  |       |      |
| 1701 | 570 | 27 | B | 0.89   | -0.41  | 0.97   | 0.43   | 2.36   | 1.86   | 1.93   | -0.95  | 2.11   | 1.42   | 3.59   | 2.30   | 3.04   | 2.24   | 1.69   | 0.43   | 0.65   | 1.45   | 0.71   | 1.88   | 1.55   | 2.65   | 1.62   | -1.32  |       |      |
| 1702 | 570 | 28 | R | 0.69   | -5.48  | 3.40   | 0.36   | -3.21  | -4.33  | -7.48  | -0.92  | 2.01   | -3.35  | 6.12   | -2.56  | -11.77 | -11.33 | 15.29  | 19.21  | 20.54  | 17.56  | 19.48  | 19.53  | 16.74  | 20.23  | 17.81  | 19.37  |       |      |
| 1703 | 570 | 28 | G | 3.28   | -5.14  | 2.03   | -1.18  | -1.61  | -9.88  | -11.50 | -3.00  | 6.47   | -11.32 | 13.71  | -0.71  | -19.24 | -15.37 | 48.97  | 41.29  | 54.26  | 48.59  | 51.28  | 46.54  | 47.34  | 52.97  | 41.54  | 42.61  |       |      |
| 1704 | 570 | 28 | B | 0.67   | -3.52  | 2.47   | 2.40   | 0.58   | -6.84  | -10.06 | 4.54   | 3.31   | -10.54 | 2.04   | 5.19   | -21.37 | -14.26 | -16.03 | -21.14 | -18.12 | -16.81 | -19.05 | -18.52 | -17.74 | -21.74 | -22.41 | -20.28 |       |      |
| 1705 | 570 | 29 | R | -2.32  | -15.36 | -0.03  | -10.41 | -5.80  | -20.54 | -13.32 | -2.83  | -10.19 | -1.17  | -5.52  | -0.83  | -5.84  | -0.86  | 5.18   | 2.00   | 2.83   | -0.13  | 5.40   | 4.71   | 1.00   | -3.46  | -6.48  | -4.48  |       |      |
| 1706 | 570 | 29 | G | -4.11  | -17.87 | 1.12   | -16.18 | -7.81  | -7.70  | -22.67 | -19.02 | -0.40  | -13.51 | 0.28   | -5.27  | 0.61   | -7.90  | 0.10   | 7.95   | 4.86   | 4.70   | 4.05   | 6.80   | 9.19   | 4.39   | -2.06  | -5.20  |       |      |
| 1707 | 570 | 29 | B | -1.48  | -23.22 | 0.16   | -22.79 | -15.63 | -7.88  | -28.95 | -30.20 | 0.63   | -18.16 | -0.42  | -10.70 | -0.63  | -10.81 | -1.77  | 14.46  | 10.37  | 8.26   | 7.39   | 10.99  | 17.25  | 4.61   | 1.77   | -3.57  |       |      |
| 1708 | 570 | 30 | R | -2.65  | -3.81  | 0.05   | -0.14  | 0.96   | -4.69  | -1.64  | -1.16  | -1.07  | -4.01  | 3      |        |        |        |        |        |        |        |        |        |        |        |        |        |       |      |

|      |     |    |   |        |        |        |        |        |        |        |        |        |        |        |        |        |        |        |        |        |        |        |        |        |        |        |        |
|------|-----|----|---|--------|--------|--------|--------|--------|--------|--------|--------|--------|--------|--------|--------|--------|--------|--------|--------|--------|--------|--------|--------|--------|--------|--------|--------|
| 1771 | 600 | 15 | R | 2.59   | 4.01   | 7.26   | 4.91   | 4.19   | 1.53   | 7.20   | 3.63   | 5.67   | 2.54   | 1.35   | 2.81   | 4.81   | 4.37   | -1.07  | -0.39  | 0.71   | -0.88  | 0.26   | 1.12   | -1.16  | 0.05   | -0.92  | 0.26   |
| 1772 | 600 | 15 | G | 0.94   | 2.04   | 1.46   | 1.28   | 1.02   | 1.33   | 8.07   | 0.58   | 1.52   | 4.97   | 2.98   | 0.36   | 3.96   | 6.86   | 1.28   | 2.04   | 2.11   | 2.21   | 1.77   | 2.21   | 3.57   | 2.74   | 3.21   | 1.19   |
| 1773 | 600 | 15 | B | -0.43  | -0.30  | 0.33   | 0.25   | -1.24  | -0.73  | 3.60   | -1.87  | -1.12  | -0.90  | 3.03   | 0.26   | 0.34   | -0.44  | 0.99   | 0.40   | 3.04   | 0.13   | -1.06  | 0.60   | 0.95   | 1.17   | 1.23   | -1.34  |
| 1774 | 600 | 16 | R | 1.88   | -6.08  | 3.30   | 2.06   | -0.19  | -6.14  | -2.78  | -2.95  | 1.24   | -12.58 | 4.77   | 1.91   | -10.18 | -4.44  | 9.67   | 6.46   | 11.03  | 8.23   | 10.28  | 9.23   | 7.54   | 10.04  | 5.25   | 10.51  |
| 1775 | 600 | 16 | G | 0.81   | -3.46  | 1.82   | 0.28   | 1.16   | -2.56  | -2.83  | -1.37  | 2.58   | -12.73 | 0.75   | 0.80   | -14.02 | -2.62  | 11.57  | 7.67   | 11.51  | 9.70   | 10.93  | 10.23  | 10.61  | 9.90   | 1.25   | 10.43  |
| 1776 | 600 | 16 | B | 0.99   | -7.35  | 1.41   | 1.63   | -0.03  | -7.47  | -3.38  | 1.73   | -1.21  | -13.17 | -0.37  | 1.98   | -9.58  | -7.88  | -26.15 | -24.39 | -27.89 | -28.12 | -28.88 | -28.13 | -23.86 | -30.28 | -37.20 | -26.08 |
| 1777 | 600 | 17 | R | 3.09   | 2.15   | 6.74   | 5.59   | 4.05   | 3.33   | 8.39   | 7.11   | 6.54   | 4.95   | 2.40   | 2.16   | 6.88   | 7.77   | -10.30 | -14.98 | -12.28 | -11.42 | -12.04 | -9.68  | -11.70 | -13.19 | -13.59 | -16.79 |
| 1778 | 600 | 17 | G | 6.21   | 7.00   | 9.81   | 10.28  | 10.83  | 10.08  | 13.59  | 12.43  | 8.77   | 10.31  | 6.86   | 8.97   | 10.01  | 17.27  | -15.23 | -27.21 | -18.45 | -18.34 | -17.27 | -13.93 | -20.43 | -20.97 | -21.73 | -29.16 |
| 1779 | 600 | 17 | B | 1.38   | 2.06   | 3.48   | 4.76   | 0.87   | -0.39  | 4.34   | 2.95   | 6.37   | -0.08  | 4.86   | 2.59   | -2.63  | 8.44   | -0.57  | 0.66   | 2.48   | -2.98  | -0.86  | 0.45   | -1.46  | -1.29  | -1.27  | 2.51   |
| 1780 | 600 | 18 | R | -28.23 | -27.95 | -28.27 | -24.89 | -23.90 | -27.40 | -26.39 | -28.20 | -29.78 | -27.29 | 0.30   | -24.73 | -26.90 | -24.98 | -25.20 | -26.86 | -28.82 | -30.21 | -30.27 | -32.10 | -30.66 | -31.90 | -24.67 | -26.23 |
| 1781 | 600 | 18 | G | 1.90   | 2.22   | 2.79   | 2.39   | 1.50   | 2.47   | 3.32   | 3.29   | 2.61   | 3.03   | 5.37   | -0.72  | 1.89   | 5.01   | 1.44   | 1.87   | 2.37   | 1.89   | 2.79   | 3.59   | 2.83   | 3.35   | 2.30   | 2.36   |
| 1782 | 600 | 18 | B | 5.97   | 4.62   | 5.29   | 2.68   | 4.09   | 2.94   | 3.39   | 3.58   | 5.60   | 4.90   | 4.88   | 1.35   | 4.54   | 6.52   | 5.62   | 6.60   | 9.86   | 5.56   | 8.82   | 8.81   | 8.28   | 8.44   | 4.27   | 6.92   |
| 1783 | 600 | 19 | R | -0.90  | -0.22  | -0.08  | 0.25   | -0.21  | -0.83  | 2.03   | 0.77   | -0.98  | -0.14  | -6.77  | -1.81  | -1.39  | 0.24   | -0.37  | -2.01  | 0.96   | -2.42  | -0.42  | 0.19   | -0.68  | 0.25   | -0.59  | -0.46  |
| 1784 | 600 | 19 | G | -2.62  | -0.60  | -0.28  | -0.46  | -0.93  | -1.90  | -0.69  | -1.60  | -0.23  | 0.65   | -7.46  | -0.39  | -1.68  | 2.81   | -0.85  | -1.36  | -0.20  | -0.80  | 0.81   | 0.09   | -1.07  | -1.13  | -0.07  | -0.74  |
| 1785 | 600 | 19 | B | 0.80   | 0.61   | 2.21   | -0.57  | 1.70   | 3.37   | 2.67   | 0.53   | 2.93   | 1.79   | 5.23   | -0.36  | 1.47   | 7.64   | 2.14   | 1.79   | 2.37   | 1.37   | -0.20  | 2.12   | 1.38   | 2.43   | -0.11  | 1.76   |
| 1786 | 600 | 20 | R | -2.67  | -5.97  | 1.38   | -11.29 | -6.69  | 3.41   | 4.89   | -9.09  | -1.89  | -15.37 | -1.69  | -3.06  | -11.10 | 12.82  | 1.48   | 4.39   | 2.40   | 2.67   | 2.06   | 0.01   | -6.19  | 1.47   | -8.19  | -3.85  |
| 1787 | 600 | 20 | G | -4.90  | -12.78 | 1.33   | -16.66 | -6.99  | 2.56   | -4.21  | -16.91 | -2.52  | -17.26 | -2.66  | -8.04  | -4.85  | 9.57   | 2.93   | 10.20  | 3.19   | 4.63   | 5.90   | 1.06   | -3.30  | 3.82   | -11.19 | -5.05  |
| 1788 | 600 | 20 | B | -7.25  | -25.33 | 1.74   | -26.76 | -9.61  | -0.31  | -12.55 | -29.01 | -4.36  | -21.92 | 5.52   | -12.50 | -6.08  | 8.62   | 4.47   | 18.51  | 8.60   | 7.37   | 10.51  | 1.90   | -2.04  | 8.01   | -10.99 | -6.89  |
| 1789 | 600 | 21 | R | 2.58   | -5.83  | 4.33   | 0.23   | -0.68  | -10.19 | -12.99 | 4.08   | 1.95   | -11.54 | -2.57  | 1.23   | -5.54  | -3.11  | 1.79   | 1.66   | 3.44   | 1.36   | 1.87   | 5.66   | 2.31   | 3.63   | -3.25  | 0.99   |
| 1790 | 600 | 21 | G | 4.82   | -8.33  | 8.14   | 1.04   | 0.75   | -14.14 | -18.05 | 5.23   | 2.66   | -13.27 | -8.85  | 1.99   | -8.75  | -5.60  | 2.94   | 2.63   | 4.21   | 3.86   | 3.66   | 5.81   | 3.82   | 3.08   | -4.25  | 1.13   |
| 1791 | 600 | 21 | B | -0.47  | -3.38  | 2.63   | -1.33  | -0.19  | -6.66  | -5.96  | 0.10   | -0.53  | -2.75  | -0.61  | 0.46   | -9.7   | -5.97  | -7.02  | -6.06  | -5.99  | -6.59  | -7.69  | -4.93  | -4.87  | -7.12  | -6.30  | -2.09  |
| 1792 | 600 | 22 | R | -0.33  | -4.11  | 3.97   | 1.99   | -1.59  | -3.54  | -3.93  | -0.34  | 0.31   | -1.16  | -1.56  | -1.31  | -1.76  | -2.66  | 1.65   | 5.29   | 3.90   | 4.04   | 3.63   | 3.03   | 3.48   | 4.47   | 3.26   | 7.64   |
| 1793 | 600 | 22 | G | 1.80   | -2.57  | 3.91   | -2.79  | -3.51  | -12.32 | -21.83 | -7.50  | 0.39   | -23.72 | -0.58  | -5.60  | -20.36 | -15.08 | 42.52  | 46.76  | 47.69  | 41.93  | 45.41  | 38.66  | 45.70  | 46.19  | 45.36  | 51.71  |
| 1794 | 600 | 22 | B | 0.27   | 2.66   | 0.79   | 2.19   | 0.74   | -0.13  | 0.47   | -2.12  | 1.09   | -5.86  | 3.46   | 1.95   | -8.01  | 1.07   | -2.38  | -1.25  | 1.51   | -0.31  | -2.34  | -3.88  | -0.15  | -0.01  | -0.86  |        |
| 1795 | 600 | 23 | R | -2.11  | 4.97   | -0.70  | 2.61   | 3.68   | 7.33   | 7.42   | -0.14  | 1.74   | 8.41   | 0.16   | 2.01   | 6.70   | 16.43  | -4.72  | -3.38  | -4.01  | -1.68  | -4.00  | -2.61  | -2.05  | -2.55  | -2.00  | -3.59  |
| 1796 | 600 | 23 | G | -0.68  | 5.68   | -0.59  | 2.02   | 3.87   | 6.56   | 6.47   | 1.64   | 2.19   | 8.33   | 1.23   | 1.52   | 5.65   | 8.98   | -3.47  | -4.57  | -4.54  | -4.43  | -4.26  | -3.31  | -4.54  | -4.14  | -4.03  | -5.95  |
| 1797 | 600 | 23 | B | 0.89   | 2.16   | 7.40   | 1.36   | 1.19   | 2.55   | 3.69   | -1.15  | 3.56   | 6.07   | 2.81   | -0.47  | 1.67   | 4.13   | 3.83   | -1.94  | -0.85  | -1.40  | -4.37  | -1.45  | -0.38  | -1.01  | -0.07  | -2.61  |
| 1798 | 600 | 24 | R | 1.65   | 0.46   | 2.21   | 4.81   | 2.21   | -3.51  | 0.02   | 4.20   | 2.14   | 1.91   | -3.92  | 1.09   | 0.66   | -3.68  | 1.12   | 2.95   | 4.12   | 7.62   | 4.12   | 3.40   | 4.95   | 1.85   | 1.40   | 1.00   |
| 1799 | 600 | 24 | G | 5.92   | 4.06   | 4.28   | 8.58   | 5.35   | -6.09  | -2.39  | 9.52   | 7.55   | 4.18   | 3.63   | 4.51   | 2.77   | -2.11  | 5.17   | 3.48   | 9.14   | 13.82  | 17.81  | 9.32   | 6.86   | 10.91  | 5.42   | 4.00   |
| 1800 | 600 | 24 | B | 4.34   | -3.95  | 1.91   | 1.98   | 0.31   | -7.51  | -4.68  | 4.71   | 0.83   | -0.04  | 8.37   | 2.31   | -4.84  | -0.14  | -1.33  | -0.99  | -0.71  | -0.56  | -0.81  | 0.05   | 0.44   | -1.58  | -3.46  | -1.64  |
| 1801 | 600 | 25 | R | 1.27   | 1.30   | 1.38   | 0.54   | 0.81   | 1.80   | 3.36   | 1.28   | 1.91   | 2.16   | -23.35 | 0.36   | 0.85   | 3.14   | 0.97   | 1.30   | 2.78   | 0.77   | 5.75   | 2.07   | 0.72   | 0.52   | -0.07  | 1.09   |
| 1802 | 600 | 25 | G | -0.83  | -0.84  | -0.28  | 0.01   | 0.54   | -0.58  | 0.64   | 0.21   | 1.60   | 1.70   | 0.46   | -0.79  | 0.53   | 1.95   | 4.71   | 0.66   | 4.36   | 2.21   | 14.99  | 3.75   | 1.14   | 4.48   | 2.23   | 0.70   |
| 1803 | 600 | 25 | B | -0.51  | -4.23  | -0.67  | -1.67  | -0.63  | 1.37   | -1.67  | 0.46   | 2.36   | -2.04  | 4.91   | -1.85  | -0.09  | 0.22   | 8.33   | -0.30  | 6.43   | 2.70   | 24.63  | 4.95   | -0.07  | 4.00   | 0.42   | -1.80  |
| 1804 | 600 | 26 | R | -0.19  | -4.88  | 0.92   | 0.00   | 1.42   | -14.56 | -10.50 | 0.81   | -0.14  | -12.24 | -20.86 | 0.50   | -8.94  | -10.57 | 4.17   | 3.15   | 4.17   | 5.17   | 5.18   | 4.30   | 3.11   | 4.10   | -2.21  | 1.15   |
| 1805 | 600 | 26 | G | 1.01   | -6.37  | 1.71   | 0.49   | -1.18  | -19.61 | -15.05 | 1.22   | 1.40   | -14.91 | -28.80 | -0.72  | -11.72 | -12.60 | 4.38   | 4.90   | 5.71   | 5.10   | 5.46   | 5.57   | 3.35   | 4.83   | -2.12  | 2.57   |
| 1806 | 600 | 26 | B | 1.74   | -1.20  | 1.68   | 0.20   | 1.07   | -2.15  | -2.01  | 1.52   | 1.48   | -1.29  | -39.08 | 2.31   | -2.30  | -0.67  | -2.67  | -2.64  | -2.49  | -1.06  | -1.62  | -2.81  | -0.17  | -1.17  | -0.56  | -0.91  |
| 1807 | 600 | 27 | R | -0.79  | -0.58  | 1.70   | 1.52   | 0.64   | -4.72  | -2.05  | 2.29   | 0.19   | -1.47  | 3.17   | -0.86  | -1.32  | -3.29  | -0.23  | -0.24  | 1.26   | 1.97   | 0.44   | 0.52   | -1.07  | 1.13   | -1.10  | -1.26  |
| 1808 | 600 | 27 | G | 0.52   | 0.43   | 2.59   | 1.68   | 1.28   | -1.70  | 1.68   | 0.63   | 3.09   | 2.77   | 1.79   | -0.73  | 0.87   | -0.63  | -0.94  | 0.42   | 0.99   | -0.62  | 0.76   | 0.75   | -0.04  | 0.78   | 0.39   | -0.49  |
| 1809 | 600 | 27 | B | 0.15   | 0.10   | 0.65   | 0.16   | 1.72   | 0.05   | 1.16   | -0.61  | 2.57   | 0.74   | 2.27   | 1.78   | 2.93   | 1.35   | 2.36   | 0.85   | 0.98   | 0.38   | 1.20   | 1.41   | 2.41   | 2.15   | 2.32   | -0.57  |
| 1810 | 600 | 28 | R | 1.37   | -3.67  | 3.69   | -0.03  | -2.23  | -5.26  | -8.07  | -1.29  | 1.19   | -3.01  | 6.52   | -2.46  | -12.46 | -10.47 | 14.50  | 17.20  | 18.06  | 15.55  | 18.46  | 17.83  | 14.82  | 18.13  | 18.84  | 19.48  |
| 1811 | 600 | 28 | G | 3.28   | -5.18  | 2.14   | -1.11  | -1.31  | -11.07 | -10.69 | -3.14  | 7.04   | -13.05 | 13.22  | -1.17  | -19.34 | -15.39 | 43.91  | 36.48  | 47.32  | 43.07  | 45.19  | 41.73  | 42.34  | 46.39  | 35.74  | 37.84  |
| 1812 | 600 | 28 | B | 0.85   | -5.30  | 2.60   | 3.08   | 1.05   | -7.85  | -9.52  | 4.63   | 3.58   | -10.78 | 3.59   | 5.66   | -21.41 | -14.30 | -15.00 | -18.41 | -16.55 | -16.15 | -18.70 | -16.03 | -16.46 | -19.38 | -21.28 | -20.21 |
| 1813 | 600 | 29 | R | -1.93  | -5.75  | -0.37  | -10.70 | -4.67  | -11.62 | -19.87 | -13.96 | -2.61  | -14.28 | -1.29  | -6.71  | -4.34  | -6.91  | -2.74  | 4.77   | 1.54   | 2.52   | -0.48  | 4.59   | 4.86   | 0.94   | -0.85  | -2.37  |
| 1814 | 600 | 29 | G | -4.19  | -5.33  | 0.75   | -17.62 | -9.10  | -10.13 | -23.90 | -20.02 | -0.65  | -17.84 | 0.47   | -6.71  | 0.79   | -8.05  | -2.61  | 7.78   | 5.05   | 4.53   | 3.34   | 7.12   | 9.73   | 3.77   | 2.44   | -2.41  |
| 1815 | 600 | 29 | B | -6.03  | -5.15  | -0.71  | -23.12 | -15.83 | -12.20 | -30.92 | -32.80 | -2.00  | -25.14 | 0.97   | -10.68 | 2.90   | -10.74 | -2.77  | 13.93  | 7.88   | 7.80   | 6.85   | 9.58   | 17.23  | 5.89   | 4.54   | -1.07  |
| 1816 | 600 | 30 | R | -1.87  | -1.93  | -0.28  | -0.26  | 0.40   | -5.10  | -2.69  | -0.66  | -0.25  | -3.50  | 3.53   | 0.35   | -5.55  | 5.05   | 3.18   | 3.21   | 3.97   | 2.36   | 4.06   | 3.21   | 3.41   | 4.12   | 2.30   | 0.05   |
| 1817 | 600 | 30 | G | -2.26  | -4.82  | 0.30   | 0.36   | -0.80  | -8.28  | -3.55  | -0.18  | 0.90   | -5.86  | 0.30   | 0.12   | -7.31  | 3.31   | 4.08   | 4.01   | 4.64   | 3.27   | 5.14   | 3.99   | 2.48   | 4.51   | 1.90   | 0.56   |
| 1818 | 600 | 30 | B | -1.93  | -3.08  | 0.50   | -0.94  | 0.03   | -3.79  | 0.02   | -1.69  | 1.79   | -2.13  | 0.70   | 0.46   | -4.26  | 1.37   | -11.25 | -11.51 | -10.97 | -10.83 | -8.59  | -9.44  | -8.51  | -12.26 | -6.23  | -3.06  |
| 1819 | 600 | 31 | R | 0.22   | 0.50   | 0.33   | 0.12   | 0.31   | -0.02  | 1.51   | 0.92   | 1.03   | 1.32   | 3.24   | -0.74  | 0.82   | 0.61   |        |        |        |        |        |        |        |        |        |        |

| 25    | 26    | 27     | 28    | 29    | 30    | 31    | 32    | 33    | 34    | 35    | 36    | 37    | 38    | 39        | 40        | 41        | 42        | 43        | 44        | 45        | 46        | 47        | 48        | 49        | 50        | 51        | 52        |       |       |      |
|-------|-------|--------|-------|-------|-------|-------|-------|-------|-------|-------|-------|-------|-------|-----------|-----------|-----------|-----------|-----------|-----------|-----------|-----------|-----------|-----------|-----------|-----------|-----------|-----------|-------|-------|------|
| MRSA  | MRSA  | MRSA   | MRSA  | MRSA  | MRSA  | MRSA  | MRSA  | MRSA  | MRSA  | MRSA  | MRSA  | MRSA  | MRSA  | P. aerug. |       |       |      |
| 11    | 12    | 13     | 14    | 15    | 16    | 17    | 18    | 19    | 20    | 21    | 22    | 23    | 24    | 3         | 4         | 5         | 6         | 7         | 8         | 9         | 10        | 11        | 12        | 13        | 14        | 15        | 16        |       |       |      |
| -0.63 | 1.14  | 0.30   | 0.65  | 0.61  | -1.78 | 0.87  | 0.59  | 1.37  | 1.42  | 0.92  | -0.30 | 1.08  | -0.50 | 0.70      | 1.17      | -0.87     | 0.28      | -0.31     | 0.90      | -0.32     | 0.11      | -0.50     | -0.10     | 0.23      | -0.10     | -0.89     | 0.65      |       |       |      |
| 0.37  | -0.37 | 0.04   | -0.58 | -0.28 | 1.09  | 0.78  | 0.74  | 0.07  | -0.04 | 0.14  | 0.14  | -0.45 | 0.51  | 0.22      | -1.01     | 0.40      | 0.58      | -0.28     | -0.22     | 0.65      | 0.43      | -0.16     | 0.37      | -0.30     | 0.40      | -0.44     | -0.06     |       |       |      |
| 0.99  | -0.17 | -1.60  | -0.05 | 0.10  | -0.18 | 1.11  | 0.83  | 0.97  | 0.90  | -0.79 | -0.52 | 0.37  | 0.54  | 0.00      | 2.21      | -0.01     | -0.23     | 0.42      | 0.14      | 0.16      | 0.11      | -1.75     | -0.93     | -0.11     | -1.36     | -0.94     | 1.01      |       |       |      |
| -1.49 | -1.08 | -1.77  | 1.45  | -0.24 | 0.02  | 0.75  | 0.49  | 1.39  | -0.09 | -0.96 | -0.52 | 1.13  | -0.11 | 0.28      | 0.33      | -0.03     | -0.40     | -0.41     | -0.51     | -0.41     | -0.22     | -0.75     | -1.86     | 0.07      | 0.88      | -1.45     | -0.32     |       |       |      |
| 0.55  | -0.66 | -2.13  | -1.26 | -1.20 | -0.34 | 0.49  | 0.88  | -0.27 | -0.12 | -0.46 | -0.61 | -0.47 | 0.46  | -0.04     | -0.22     | -0.50     | 0.59      | -0.21     | 0.12      | 0.55      | 1.20      | -0.15     | 0.96      | 0.55      | -0.66     | -0.90     | -0.57     |       |       |      |
| 0.28  | -0.35 | -2.11  | 1.34  | 0.62  | -0.11 | -0.16 | 2.13  | 0.25  | -0.34 | -1.16 | 0.07  | 2.98  | 1.09  | 0.28      | 0.85      | 0.61      | -0.23     | 0.28      | 1.40      | 0.21      | -0.67     | -0.08     | 0.14      | -0.26     | -0.04     | -0.73     | 0.39      |       |       |      |
| 0.06  | 0.55  | 0.24   | -0.61 | 1.06  | -0.56 | 0.54  | 0.03  | 0.01  | -0.98 | -0.32 | -0.27 | 0.00  | -0.26 | 0.13      | -0.39     | -0.70     | 0.76      | 0.24      | 0.92      | 0.77      | 0.50      | -0.20     | -0.07     | 0.14      | 0.82      | -0.92     | 0.05      |       |       |      |
| 0.19  | 0.79  | 1.13   | 0.98  | -0.59 | -0.07 | 1.26  | 1.22  | 1.07  | 0.26  | 0.31  | 0.33  | 0.30  | 1.50  | 0.63      | 0.23      | 0.75      | 0.88      | 0.33      | 0.57      | 0.90      | 0.15      | 0.13      | 0.36      | 0.48      | 0.19      | 0.58      | -0.21     |       |       |      |
| -0.74 | 1.43  | 1.88   | 0.66  | 0.41  | 2.67  | 1.20  | 0.52  | -0.35 | 1.30  | 0.65  | -0.50 | 1.31  | 0.32  | 0.54      | 0.18      | 1.68      | 0.83      | 1.22      | 0.76      | 0.95      | 0.04      | -1.38     | -0.50     | -0.57     | -0.60     | -0.30     | 0.16      |       |       |      |
| -1.41 | -0.36 | -1.00  | -1.47 | -1.84 | -3.01 | -0.26 | 2.84  | 3.09  | -1.29 | -0.01 | 0.72  | -0.28 | -0.59 | -1.26     | -1.57     | -2.15     | -0.21     | -0.82     | -0.70     | -0.33     | 1.09      | -0.40     | -0.68     | -1.22     | 1.04      | -0.92     | -0.93     |       |       |      |
| -4.56 | -3.09 | -3.96  | -2.21 | -4.72 | -7.43 | -2.50 | 1.34  | 3.14  | 0.68  | -1.20 | 1.01  | -1.94 | -1.04 | -1.25     | -0.11     | -1.36     | 0.10      | -1.39     | -1.61     | -0.19     | 0.82      | -0.27     | -1.74     | -1.75     | -2.28     | 0.69      | -1.95     |       |       |      |
| -1.90 | -0.86 | 0.74   | -0.88 | -0.44 | -2.70 | -0.48 | -1.82 | 1.91  | -0.28 | -1.79 | 0.18  | 0.34  | 0.00  | 0.21      | 1.61      | 1.21      | 0.04      | 0.84      | -0.72     | 0.24      | 1.43      | 1.56      | -0.83     | -2.13     | -1.73     | 0.00      | 0.59      |       |       |      |
| -2.80 | -9.66 | -12.00 | -5.99 | -4.65 | -3.32 | 1.67  | 0.44  | 0.01  | -0.88 | -2.10 | -0.31 | 0.86  | 0.52  | -0.32     | 0.95      | -0.69     | -0.36     | 0.48      | -0.52     | -0.73     | -2.39     | -0.70     | -1.10     | -2.88     | -3.11     | -5.53     | -3.82     |       |       |      |
| -1.94 | -4.62 | -6.28  | -4.12 | -3.22 | -0.11 | 0.36  | 0.90  | -0.34 | -0.97 | -1.89 | -1.30 | -0.79 | -0.40 | 0.04      | -0.43     | -0.49     | -0.09     | 0.10      | 0.59      | 0.92      | -1.83     | -0.41     | -2.09     | -1.37     | -1.65     | -0.33     | -1.36     |       |       |      |
| 0.01  | 0.27  | 0.14   | 0.50  | -0.28 | 0.10  | -0.12 | -0.09 | -0.02 | -0.12 | -0.09 | -1.66 | -0.37 | 0.48  | -2.06     | -0.02     | -0.03     | -0.07     | 0.36      | 0.42      | 0.33      | -0.96     | 0.02      | 0.05      | -0.29     | -0.45     | -0.18     | 0.14      | -0.39 | -1.12 | 0.01 |
| 1.23  | 0.25  | 0.64   | 0.69  | 0.71  | 0.33  | 1.59  | 1.97  | 1.52  | 0.35  | 0.40  | 1.09  | -0.26 | 2.63  | 0.29      | 0.22      | -0.12     | 0.48      | -0.33     | 0.82      | 0.50      | 1.49      | -0.04     | 1.37      | 1.70      | 0.62      | 0.56      | 2.35      |       |       |      |
| -1.01 | -0.16 | -1.00  | -0.55 | -0.83 | 0.00  | 1.24  | -0.14 | -0.03 | -0.04 | 0.12  | -0.65 | -0.36 | -0.69 | -0.27     | 0.07      | -0.70     | 0.04      | 0.00      | -0.77     | -0.34     | -0.31     | -0.29     | -0.65     | -0.83     | 0.28      | 0.31      | -0.93     |       |       |      |
| 1.54  | 0.93  | 1.62   | 0.69  | 1.44  | -0.08 | 0.54  | 2.01  | 0.96  | 1.17  | 0.36  | 1.28  | 1.53  | 1.19  | 0.40      | 0.52      | 1.39      | 1.08      | 0.41      | 2.12      | 1.10      | -0.82     | 1.09      | 1.10      | -0.81     | -1.15     | -0.37     | -0.50     |       |       |      |
| -0.06 | -0.81 | -0.92  | 0.07  | -0.42 | -0.17 | 0.75  | -1.03 | -0.93 | -1.26 | 0.04  | -1.67 | -0.28 | -0.16 | -0.54     | -0.92     | -1.77     | -0.70     | -0.50     | -0.10     | -0.46     | -0.40     | 0.33      | -0.05     | -2.36     | -0.85     | -0.66     | -0.21     |       |       |      |
| -0.34 | -0.61 | -0.64  | -0.14 | -0.17 | -0.91 | 0.21  | -1.02 | -1.26 | -1.43 | -0.48 | -0.74 | -1.64 | -0.07 | -0.75     | -0.41     | -0.57     | -0.24     | -0.82     | -0.33     | -0.53     | -0.76     | -1.30     | -0.91     | -0.51     | -0.77     | -1.31     | -0.64     |       |       |      |
| 0.35  | -0.86 | 0.42   | 0.97  | 0.45  | -0.33 | 2.14  | 0.38  | -0.05 | 0.61  | -0.09 | -0.45 | 1.31  | -0.32 | 0.43      | -0.86     | -1.18     | -0.46     | -0.36     | -0.10     | 0.04      | -1.96     | 1.07      | 0.01      | 0.64      | -0.46     | -0.31     | -0.43     |       |       |      |
| 0.70  | 1.72  | 2.65   | 1.10  | 0.12  | 0.63  | 0.72  | 1.52  | 1.46  | 0.19  | 0.45  | -0.57 | 0.63  | 0.60  | 0.32      | 0.32      | 0.32      | 0.62      | 0.44      | 1.06      | 0.01      | 1.15      | -0.83     | 0.89      | 0.28      | 0.01      | 0.94      | 0.49      |       |       |      |
| 0.21  | 1.74  | 2.01   | 1.65  | 0.83  | 1.08  | 0.74  | 0.11  | 0.99  | 0.14  | 0.68  | 1.07  | 1.17  | 0.93  | 0.94      | 0.17      | 0.32      | -0.50     | 0.44      | 0.29      | 0.72      | 1.44      | 0.41      | 0.88      | 0.92      | 1.11      | 0.33      | 1.07      |       |       |      |
| 0.98  | -0.54 | -0.32  | -0.89 | 0.90  | 1.09  | -0.08 | 0.07  | -2.60 | -0.17 | -0.73 | -0.06 | 1.14  | -0.08 | -0.96     | 0.90      | -1.22     | -0.01     | -0.30     | 1.08      | -0.13     | -1.57     | -0.81     | -1.56     | 0.87      | -0.41     | -0.56     | 0.04      |       |       |      |
| -0.28 | -0.99 | -0.09  | -0.07 | -0.16 | -0.87 | 1.20  | 1.12  | 0.76  | 0.13  | -0.22 | 1.88  | 1.36  | -1.18 | 0.12      | 0.28      | 0.15      | -0.06     | -0.27     | -0.01     | 0.45      | 2.46      | -0.83     | 0.34      | -1.17     | -1.04     | -0.62     | 0.62      |       |       |      |
| -1.08 | -0.59 | -2.16  | -0.40 | -1.58 | -0.66 | 0.66  | 1.59  | 0.03  | 0.13  | -0.57 | 1.17  | 0.70  | 1.73  | -0.24     | 0.79      | -0.04     | 0.68      | 0.04      | -0.67     | 0.67      | -0.65     | -0.29     | -0.67     | -1.21     | -0.54     | -0.58     | -2.17     |       |       |      |
| -0.32 | -1.68 | -2.46  | -0.05 | -0.84 | -1.88 | 1.15  | -0.30 | -0.14 | -0.86 | -0.46 | -1.67 | -0.03 | -1.01 | -0.03     | -0.33     | -0.78     | -0.12     | -0.24     | 3.00      | -0.26     | 0.71      | -1.11     | -0.27     | 0.69      | -0.57     | -0.76     | 0.44      |       |       |      |
| -2.61 | -5.12 | -2.78  | -1.41 | -1.10 | -2.24 | 0.60  | 1.53  | 0.14  | -0.08 | -1.85 | 0.39  | 0.30  | -0.68 | 0.34      | 0.29      | -0.63     | -0.12     | -0.24     | -0.24     | -0.11     | 0.11      | -0.02     | -0.38     | 0.60      | -0.83     | 0.07      | -1.12     |       |       |      |
| -3.00 | -4.71 | -3.95  | -0.65 | -1.17 | -3.16 | 0.57  | 0.90  | 0.85  | -0.04 | -0.97 | -0.67 | -0.25 | -0.14 | 0.51      | 0.43      | -0.18     | 0.81      | 0.51      | 0.31      | 0.54      | 1.74      | -0.18     | -0.18     | -1.52     | -0.06     | 0.85      | -0.19     |       |       |      |
| -2.19 | -7.55 | -0.78  | -2.73 | -1.86 | -1.06 | 1.13  | 0.44  | -1.56 | -0.63 | -2.83 | 0.19  | 0.06  | -1.78 | -0.13     | 0.30      | 0.93      | -0.08     | -0.39     | -0.06     | 0.32      | 0.34      | 0.84      | 1.15      | 0.97      | -0.48     | -1.15     | -0.66     |       |       |      |
| -0.14 | 0.01  | -0.14  | 0.35  | -0.47 | 0.34  | 0.54  | 1.12  | 0.18  | -0.11 | 0.22  | 0.50  | -0.17 | -0.57 | 0.05      | 0.05      | -1.13     | 0.18      | 0.06      | 0.21      | 1.32      | -0.06     | -0.20     | -0.72     | -1.20     | -0.11     | 0.13      | 0.32      |       |       |      |
| -0.28 | -0.25 | -0.39  | -0.24 | 0.02  | 0.24  | 1.10  | -0.50 | 0.31  | 0.06  | 0.11  | -0.98 | 0.69  | 0.24  | 0.10      | 0.29      | -0.44     | -0.17     | 0.12      | 0.16      | -0.53     | -0.19     | -0.31     | -0.20     | 0.34      | 0.31      | 0.03      | -0.47     |       |       |      |
| 0.30  | 0.64  | 0.66   | 1.20  | 0.18  | -1.45 | 2.58  | 0.33  | 1.03  | -0.13 | -0.58 | -1.41 | 0.12  | 0.27  | -0.82     | 0.43      | -0.67     | 0.68      | -0.82     | 0.18      | 0.23      | 0.43      | -0.24     | -0.31     | -1.39     | 0.14      | -0.76     | -0.11     |       |       |      |
| -0.20 | -1.06 | -1.15  | -0.30 | -0.24 | 0.03  | 0.08  | -2.53 | -3.02 | -5.26 | -4.43 | 1.24  | 0.79  | -1.21 | 0.75      | -0.03     | -0.37     | -0.03     | 0.34      | 0.27      | 0.16      | -0.47     | 0.88      | 0.53      | 0.57      | 0.64      | 1.32      | 0.75      |       |       |      |
| 0.74  | 1.35  | 0.74   | -0.53 | 0.46  | 0.74  | 0.78  | 1.50  | 0.33  | 0.32  | 0.86  | -0.28 | -0.65 | 1.49  | 0.35      | 0.35      | -0.15     | 0.54      | 0.55      | -0.07     | 0.20      | 2.16      | 0.05      | 0.39      | -0.19     | 0.17      | -0.52     | -0.10     |       |       |      |
| -0.03 | 1.52  | 0.97   | 2.12  | -0.72 | 0.72  | 1.08  | 4.27  | 4.46  | 1.48  | 2.35  | 3.95  | 0.17  | 0.31  | 0.28      | -0.12     | 0.34      | -0.01     | 0.12      | 1.94      | 0.34      | -0.46     | 1.50      | 0.65      | 1.36      | 0.44      | 0.73      | 2.75      |       |       |      |
| 0.68  | 0.89  | 0.52   | 0.88  | -0.58 | 0.08  | 0.70  | 0.19  | 0.83  | -0.50 | 1.07  | 1.00  | 0.76  | 0.83  | 0.38      | -0.16     | 1.17      | 0.55      | -0.27     | 1.01      | 1.20      | 1.51      | 0.06      | 0.61      | -0.40     | 0.26      | 0.46      | -0.82     |       |       |      |
| 0.41  | 0.31  | -0.05  | 1.14  | 0.82  | 0.37  | 0.28  | 1.58  | 0.28  | 0.90  | 0.14  | 0.37  | -0.15 | -0.88 | -0.08     | 0.88      | -0.02     | 0.51      | 0.15      | 0.32      | -0.31     | 0.15      | -0.23     | 0.38      | 0.91      | 0.41      | 1.46      | 0.66      |       |       |      |
| 1.36  | 0.01  | 1.13   | -0.32 | 1.22  | -0.78 | 1.61  | 0.17  | 0.59  | 0.66  | 1.19  | -0.21 | 0.43  | -1.08 | 0.14      | -0.60     | -0.60     | 0.37      | -0.24     | -0.23     | 0.39      | -0.01     | -0.04     | 1.23      | 0.59      | -0.11     | 0.45      | 0.73      |       |       |      |
| 0.18  | -0.26 | -1.88  | -0.65 | -0.64 | -0.37 | 0.72  | 0.79  | 0.37  | -1.20 | 0.46  | 0.30  | 0.46  | 0.28  | 0.78      | 0.08      | 0.57      | -0.71     | -0.03     | 1.12      | 0.16      | -0.99     | -0.47     | 0.01      | 0.63      | -0.59     | 0.41      | -0.68     |       |       |      |
| 0.15  | -0.17 | -1.11  | -0.24 | -0.88 | -0.67 | 0.50  | 0.99  | 0.92  | 0.19  | 0.19  | 0.47  | 0.12  | -0.37 | -0.52     | 0.09      | -0.42     | 0.73      | 0.02      | -0.10     | 0.36      | 0.59      | -0.32     | -0.26     | 0.44      | -0.15     | 0.66      | -0.72     |       |       |      |
| -0.75 | 0.18  | 1.48   | -0.66 | 0.65  | 1.12  | 0.68  | -0.45 | -0.02 | 0.38  | 1.53  | 1.32  | 0.82  | -0.86 | 0.29      | 1.68      | 0.33      | 0.17      | -0.45     | 0.06      | 0.61      | 0.78      | -0.56     | 1.85      | -0.05     | -0.47     | 1.08      | -0.59     |       |       |      |
| 0.44  | 0.49  | 1.32   | 1.35  | 0.05  | -0.13 | 0.62  | 1.28  | 1.29  | 2.24  | 0.11  | 1.55  | 0.82  | 0.85  | 0.05      | 0.18      | -0.42     | 0.60      | 0.72      | -0.01     | 0.42      | 1.81      | 0.30      | 1.45      | 0.86      | -0.68     | 0.68      | 0.81      |       |       |      |
| 1.21  | 1.44  | 0.96   | 0.75  | -0.76 | 0.16  | 0.94  | 1.35  | 0.47  | -0.50 | 0.17  | -0.40 | 0.00  | -1.15 | 0.01      | 0.97      | 0.89      | 0.43      | -0.19     | -0.32     | 0.77      | -0.65     | -0.08     | -0.38     | -0.12     | 0.38      | -0.51     | 0.33      |       |       |      |
| -0.41 | 0.76  | -0.04  | 0.03  | 0.28  | -0.69 | 2.19  | 0.44  | -0.19 | 0.32  | 0.56  | -0.37 | 1.70  | 0.01  | -0.24     | 0.94      | -1.03     | 0.21      | -0.14     | 0.74      | -1.12     | 0.06      | -0.96     | 0.03      | -0.21     | -0.43     | -0.26     | -1.38     |       |       |      |
| -0.87 | -1.79 | -2.71  | -1.17 | -2.73 | -2.32 | 0.15  | 0.46  | 1.29  | -1.72 | -1.10 | -0.16 | -0.01 | 0.68  |           |           |           |           |           |           |           |           |           |           |           |           |           |           |       |       |      |

|       |        |        |       |       |       |       |       |       |       |       |       |       |       |       |       |       |       |       |       |       |       |       |       |       |       |       |       |
|-------|--------|--------|-------|-------|-------|-------|-------|-------|-------|-------|-------|-------|-------|-------|-------|-------|-------|-------|-------|-------|-------|-------|-------|-------|-------|-------|-------|
| 0.65  | 0.17   | -0.10  | 0.35  | 0.06  | 0.96  | 0.54  | -3.13 | -2.70 | -3.33 | -1.96 | -1.41 | 0.83  | 1.57  | -0.87 | 0.01  | -0.07 | 0.63  | 1.09  | 0.01  | 0.66  | -0.63 | 0.71  | 0.97  | 0.50  | 0.04  | -0.98 | 0.28  |
| -0.01 | -0.63  | 0.41   | -0.24 | -0.06 | -0.15 | -0.89 | 2.04  | 0.67  | 0.53  | 0.10  | 2.36  | -0.47 | -0.10 | 0.47  | 0.17  | 0.16  | -0.51 | -0.97 | -0.23 | 0.01  | 0.42  | -0.38 | 0.35  | 0.44  | 0.00  | 0.41  | 0.59  |
| -1.23 | 1.04   | -0.60  | 0.55  | -0.59 | -0.27 | -0.87 | 5.37  | 3.48  | 2.27  | 2.37  | 2.66  | 3.32  | 1.29  | 0.05  | 0.45  | -0.01 | 1.19  | 0.86  | 0.48  | 0.12  | 1.24  | 0.26  | 1.16  | 0.66  | 1.03  | 1.32  | 0.64  |
| -0.48 | 0.54   | 0.47   | -0.05 | 0.32  | -0.85 | 0.08  | 4.00  | -0.06 | 1.42  | 0.32  | 1.09  | 1.70  | -0.22 | -0.05 | 0.43  | -0.90 | -0.10 | 0.17  | 0.72  | 0.01  | 0.43  | -0.31 | 0.87  | 0.20  | 0.16  | -1.48 | 0.86  |
| 0.58  | -0.17  | 0.04   | 0.28  | 0.24  | 0.77  | 1.17  | 1.04  | -0.24 | -0.82 | 0.73  | -1.07 | -0.52 | 0.50  | 0.54  | -0.23 | -0.08 | 0.28  | 0.12  | -0.06 | 0.34  | 0.64  | 0.38  | -0.09 | 0.07  | -0.25 | -1.14 | -0.05 |
| 0.19  | -0.08  | -0.72  | 0.31  | 0.41  | 0.40  | 0.82  | 0.88  | -0.26 | 0.93  | -0.85 | -0.63 | 1.87  | 0.96  | 0.03  | 0.04  | 0.98  | -0.15 | 1.44  | 1.06  | -0.22 | -0.51 | -3.68 | 1.54  | -0.37 | 1.71  | -2.20 | 1.02  |
| -1.20 | -1.62  | -2.34  | 1.18  | -1.86 | -0.19 | 0.95  | 1.36  | -0.16 | 0.22  | -0.21 | -0.45 | 0.88  | 0.17  | 0.04  | 0.42  | -0.09 | 0.83  | 0.82  | 0.89  | 0.11  | 0.00  | -0.99 | -0.31 | -0.11 | -0.18 | -1.92 | 0.72  |
| 0.44  | -1.17  | -2.42  | -0.75 | 0.44  | 0.13  | 0.88  | 0.02  | 0.35  | 0.11  | -0.30 | -0.65 | 0.14  | 0.14  | -0.03 | 0.21  | 0.17  | 0.88  | 0.74  | 0.50  | 0.59  | 0.06  | -0.26 | 0.41  | 0.65  | -1.12 | -1.56 | 0.07  |
| -0.01 | -0.15  | -2.14  | 0.46  | -1.08 | -0.87 | 0.44  | 0.97  | -0.27 | -0.84 | -0.89 | 2.45  | 1.31  | 1.21  | 0.43  | 0.81  | 0.27  | 0.93  | 0.16  | 1.21  | 0.34  | 0.89  | -0.68 | 0.94  | 0.55  | 0.33  | 0.22  | 0.37  |
| -0.09 | 0.24   | 1.19   | -0.28 | 0.21  | -0.35 | 0.81  | 1.34  | 0.53  | -1.76 | 0.66  | -0.99 | -0.11 | 0.64  | -1.04 | -0.84 | -0.32 | 0.99  | 1.23  | 0.55  | 0.41  | 0.35  | -1.10 | -0.15 | 0.04  | 0.44  | -2.18 | 0.23  |
| -0.09 | 0.79   | 1.43   | 1.82  | 0.16  | 1.49  | 2.41  | 0.83  | 0.68  | -0.04 | 1.26  | 0.25  | 1.67  | 1.59  | 2.24  | 0.35  | 1.09  | 2.15  | 1.29  | 1.04  | 1.41  | 0.83  | 0.89  | 0.27  | 1.70  | 0.19  | 0.25  | 0.08  |
| 1.49  | 3.14   | 5.29   | 1.35  | 1.21  | 1.59  | 1.32  | 1.27  | -0.17 | 1.19  | 1.07  | 0.41  | 0.64  | 0.58  | 1.81  | 0.91  | 0.98  | 2.37  | 3.28  | 1.21  | 0.86  | 0.19  | -0.74 | 1.04  | -1.18 | 0.19  | 0.21  | 0.59  |
| -2.82 | -0.31  | -0.49  | -1.88 | -3.69 | -1.92 | -0.01 | 3.91  | 4.21  | -1.59 | 1.18  | 0.60  | 0.49  | -0.51 | -1.35 | -2.39 | -2.84 | 0.30  | -1.78 | -1.11 | 0.26  | 1.56  | 0.20  | -0.14 | -1.46 | 0.60  | -0.77 | 0.21  |
| -4.39 | -0.85  | -4.23  | -2.54 | -6.19 | -9.03 | -2.48 | 2.09  | 6.73  | 0.99  | 1.84  | 3.47  | -1.87 | -0.40 | -0.50 | -1.16 | -1.70 | 0.58  | -0.97 | -1.86 | 0.19  | -0.13 | 0.25  | -1.28 | -3.05 | -2.22 | -1.24 | -3.40 |
| -4.50 | 1.32   | -0.51  | -3.43 | -2.45 | -3.83 | -0.36 | -0.35 | 1.08  | -2.66 | -2.35 | 2.68  | 0.66  | 0.37  | 1.57  | 3.09  | 2.05  | 2.67  | 0.94  | 0.74  | 1.25  | 0.94  | -0.24 | -0.71 | -1.70 | -0.08 | -1.78 | -0.76 |
| -3.70 | -13.44 | -17.99 | -8.19 | -6.29 | -4.71 | 1.68  | 0.89  | 0.52  | -0.11 | -0.22 | 1.85  | 1.52  | 2.20  | 0.35  | 0.00  | -0.19 | 0.91  | 0.27  | 0.62  | -0.55 | -5.08 | -2.20 | -2.96 | -6.85 | -6.37 | -3.85 | -7.23 |
| -2.70 | -7.22  | -9.61  | -6.37 | -4.63 | -1.14 | 0.34  | 0.56  | -0.22 | -0.59 | -1.11 | -1.27 | -0.23 | -0.41 | -0.02 | -0.74 | -0.86 | 0.10  | 0.05  | 1.07  | 0.88  | -2.57 | -1.46 | -3.90 | -1.67 | -2.04 | -1.47 | -2.17 |
| 1.11  | -0.30  | 0.50   | 0.26  | 0.04  | 0.09  | -0.12 | -0.18 | -1.48 | -0.37 | 0.28  | -3.08 | 0.04  | 0.41  | 1.06  | 0.29  | 0.68  | 0.37  | -0.30 | 0.61  | 1.10  | 0.37  | -0.38 | -0.19 | 0.06  | -0.52 | -0.69 | 0.31  |
| 1.32  | 0.12   | 0.08   | 0.77  | 0.94  | 1.49  | 2.50  | 2.30  | 2.43  | 0.53  | 0.55  | 0.56  | -0.26 | 3.24  | 0.43  | 0.48  | -0.61 | 1.60  | 1.00  | 1.57  | 1.00  | 2.10  | -0.22 | 2.52  | 2.18  | 0.41  | 2.13  | 2.42  |
| -0.94 | -0.37  | -0.52  | -0.43 | -1.46 | -0.39 | 1.27  | 0.42  | -1.00 | -0.27 | 0.14  | -0.68 | -1.33 | -0.19 | -0.34 | -0.61 | -0.92 | -0.01 | 0.10  | -0.88 | -0.55 | -1.14 | -0.79 | -1.41 | -1.01 | -0.51 | -1.01 | -1.70 |
| 1.59  | 1.30   | 0.29   | 0.28  | 2.99  | 0.17  | 1.48  | 0.85  | 2.56  | 2.18  | 0.74  | 0.52  | 3.75  | 2.23  | 3.12  | 0.98  | 0.04  | 1.98  | 0.86  | 2.51  | 1.01  | -1.12 | 0.75  | 1.40  | -0.29 | 0.37  | 0.10  | 1.53  |
| -0.86 | -1.47  | -1.01  | -0.51 | -2.28 | -1.33 | 0.90  | -1.96 | -3.12 | -2.29 | -0.61 | -1.64 | -0.88 | -0.70 | -0.94 | -1.52 | -0.90 | -1.36 | -0.75 | -0.23 | -1.56 | -1.46 | -0.99 | -3.03 | -2.51 | -1.43 | -2.50 | -1.06 |
| -1.01 | -0.39  | -0.53  | -0.77 | -1.41 | -1.11 | -0.63 | -1.41 | -1.85 | -2.40 | -1.14 | -1.16 | -0.75 | -0.53 | -1.11 | -0.48 | -0.71 | -0.75 | -0.26 | -0.54 | -0.09 | -1.76 | -1.46 | -1.66 | -0.81 | -1.08 | -1.79 | -0.82 |
| -0.04 | -0.99  | -0.17  | -0.21 | 0.26  | -0.34 | 1.31  | -0.06 | -0.39 | 0.79  | -1.06 | -1.09 | 0.61  | -0.41 | -0.26 | -0.28 | 0.59  | -0.23 | 0.03  | -0.67 | 0.57  | -1.28 | -1.01 | 0.08  | -0.28 | -1.52 | -1.85 | -1.17 |
| 0.94  | 1.67   | 3.18   | 2.02  | 0.17  | 0.83  | 2.88  | 2.67  | 1.81  | 1.42  | 2.07  | 0.13  | 1.66  | 1.96  | 1.44  | -0.62 | -0.11 | 1.65  | 1.29  | 1.15  | 1.19  | 1.61  | -1.10 | 0.97  | 0.99  | 0.47  | -0.61 | 0.74  |
| 1.20  | 2.61   | 2.62   | 2.48  | 1.57  | 2.83  | 1.41  | 4.00  | 0.64  | 1.04  | 1.90  | 2.28  | 0.99  | 1.35  | 1.05  | 1.39  | 1.19  | -0.36 | 1.54  | 0.73  | 0.90  | 1.72  | 1.29  | 0.77  | 1.67  | 1.57  | 1.21  | 1.86  |
| 0.71  | -0.83  | -0.02  | 0.15  | 1.08  | 0.69  | 0.59  | 0.62  | -1.98 | -0.74 | 0.91  | 0.99  | 1.36  | 0.53  | -0.78 | -0.09 | 0.13  | 0.64  | -0.05 | -0.67 | 0.18  | -0.93 | -1.94 | 0.02  | -0.14 | 0.19  | -2.05 | 0.32  |
| -0.68 | -1.64  | -1.12  | 0.50  | -0.53 | -0.96 | 1.65  | 2.51  | 0.68  | -0.31 | -0.07 | 1.80  | 1.54  | 0.03  | 0.22  | 0.70  | 0.02  | 0.20  | 0.08  | 0.62  | 1.16  | -1.77 | -1.73 | -2.05 | -2.00 | -2.17 | 0.61  | 0.61  |
| -1.11 | -3.00  | -3.36  | -0.69 | -1.99 | -1.25 | 1.37  | 2.00  | 1.12  | -1.02 | 1.09  | 1.65  | 2.50  | 2.79  | 0.12  | 0.23  | 0.19  | 1.10  | 0.81  | 0.39  | 0.93  | -1.39 | -1.51 | -1.49 | -2.47 | -1.13 | -1.38 | -3.39 |
| -1.53 | -4.14  | -2.55  | 0.34  | -1.53 | -2.77 | 2.00  | -0.06 | -1.21 | -1.25 | 1.45  | -2.16 | 0.00  | -1.64 | 0.66  | -0.99 | -0.54 | -0.57 | 0.21  | 0.64  | 0.12  | -0.59 | -1.19 | 0.77  | 1.14  | -1.62 | -1.18 | 2.11  |
| -3.50 | -5.72  | -5.72  | -1.86 | 0.27  | -3.86 | 1.09  | 1.43  | 0.40  | -0.51 | -2.19 | 0.73  | 0.36  | 1.04  | 1.25  | 0.51  | -0.34 | -0.01 | 0.58  | 0.20  | 0.66  | 0.96  | -0.06 | 0.05  | 1.02  | -0.19 | 0.03  | -0.73 |
| -3.53 | -5.95  | -6.74  | -1.81 | -1.14 | -4.73 | 1.13  | 2.05  | 0.62  | 0.75  | -2.01 | 0.14  | 0.09  | 0.21  | 1.00  | 0.45  | -0.47 | 1.61  | 0.98  | 0.06  | 0.67  | 1.67  | -0.30 | 0.26  | -1.33 | 0.07  | 0.47  | -1.22 |
| -3.08 | -8.09  | -2.59  | -4.26 | -1.80 | -2.50 | 2.22  | -1.21 | -2.39 | -0.72 | -2.78 | -0.23 | 0.58  | 0.69  | 1.79  | 0.93  | 0.96  | 0.42  | -0.21 | 1.28  | 0.55  | -0.30 | 0.39  | 0.48  | -0.62 | 0.02  | -2.23 | -0.72 |
| 0.64  | 0.64   | 0.06   | -0.12 | -0.15 | 0.48  | 0.92  | 0.84  | 0.48  | -0.56 | 0.06  | 0.16  | 0.29  | -0.96 | 0.22  | -1.00 | -0.31 | 0.06  | 0.35  | 0.50  | 0.76  | -0.58 | -0.11 | -0.68 | -0.45 | -0.34 | -0.49 | 1.70  |
| -0.34 | -0.43  | -0.57  | 0.08  | 0.05  | -0.21 | 0.26  | -0.09 | 0.54  | 0.04  | 0.50  | -0.62 | -0.43 | 0.04  | -0.10 | 0.38  | -0.49 | 0.02  | 0.44  | 0.36  | -0.04 | 0.01  | -0.39 | -0.91 | 0.14  | 0.52  | -0.87 | -0.71 |
| 0.25  | -0.50  | 0.68   | -0.07 | -0.10 | 1.18  | 1.97  | 0.72  | -0.02 | -0.27 | 0.08  | -0.90 | 0.90  | 0.12  | 0.20  | -0.30 | -0.97 | 0.55  | -0.51 | 0.53  | 0.35  | 0.22  | -0.32 | 0.58  | -1.92 | -0.42 | -1.31 | -0.05 |
| -0.52 | -1.67  | -1.15  | -0.09 | -0.89 | 1.08  | 0.98  | -4.96 | -6.26 | -8.25 | -8.30 | 1.62  | 0.27  | 0.02  | 0.53  | 0.03  | -0.25 | -1.06 | -1.06 | -0.09 | -0.64 | 0.57  | 1.01  | 0.52  | -0.09 | 0.50  | 0.43  | 1.21  |
| 0.79  | 0.96   | 0.91   | -0.13 | 0.55  | 0.78  | 1.63  | 1.37  | 0.77  | 0.96  | 1.30  | 0.31  | -0.37 | 1.20  | 0.50  | 0.24  | 0.10  | 1.24  | 1.48  | 0.88  | 1.41  | 0.63  | 0.26  | 0.68  | 0.79  | 0.48  | -0.44 | 0.74  |
| 0.45  | 1.78   | 2.65   | 2.13  | -0.26 | 2.01  | 2.44  | 4.42  | 5.61  | 4.16  | 4.29  | 4.69  | 1.06  | 1.80  | 1.80  | -0.45 | 0.45  | 0.60  | 0.06  | 2.25  | 0.47  | 1.54  | 1.07  | 0.69  | 1.57  | 1.79  | 1.08  | 3.53  |
| 1.30  | 1.00   | 0.62   | 0.28  | 0.46  | 0.52  | 1.57  | 0.43  | 0.72  | 0.54  | 1.22  | 1.81  | 1.43  | 1.06  | 0.37  | 1.06  | 0.78  | 1.23  | 0.54  | 1.47  | 1.61  | 1.57  | -0.36 | 1.38  | 1.19  | 0.27  | 1.04  | 0.52  |
| 0.41  | 0.49   | 0.45   | 1.63  | 0.36  | 0.70  | 1.55  | 1.08  | 0.32  | 0.98  | 1.27  | 0.88  | 0.11  | 1.59  | 0.55  | 0.81  | 0.97  | 1.16  | 0.94  | 0.99  | 0.49  | 0.84  | 0.43  | 0.06  | 1.09  | 0.27  | 1.08  | 1.22  |
| 0.19  | -0.54  | 1.84   | -0.92 | 1.96  | -1.17 | 2.04  | 1.38  | 1.13  | 2.50  | 0.46  | -1.19 | 0.68  | 0.65  | 1.46  | 0.15  | 1.09  | 0.75  | -0.06 | 0.90  | 1.04  | 1.06  | -0.14 | 3.00  | 1.37  | 0.06  | -0.69 | -0.22 |
| -0.83 | -1.55  | -1.65  | -2.06 | -0.58 | 1.10  | 1.38  | 1.22  | 1.16  | -0.78 | 0.11  | 0.55  | 0.80  | 0.56  | 1.16  | 0.87  | 0.81  | -0.08 | -0.04 | 1.69  | 1.14  | -0.07 | 0.68  | 0.39  | 0.84  | 0.08  | 0.25  | -0.68 |
| 0.21  | -0.35  | -0.81  | 0.05  | -0.42 | 1.14  | 1.58  | 0.91  | -0.23 | 0.08  | 0.55  | -0.24 | 0.20  | 0.01  | -0.28 | -0.14 | 0.17  | 0.09  | 0.34  | 0.29  | 0.80  | 0.79  | -0.53 | -0.47 | -0.31 | -0.28 | -0.54 | -0.66 |
| -0.11 | 0.91   | 1.26   | 1.08  | -0.10 | 3.37  | 1.15  | 0.66  | 0.79  | 1.28  | 0.96  | 2.82  | 1.30  | -0.54 | 0.84  | 0.35  | 0.62  | 0.45  | 1.10  | 1.08  | 0.35  | -0.15 | -0.88 | 1.14  | 0.63  | 1.52  | -0.76 | 0.99  |
| 0.35  | -0.03  | 1.71   | 1.92  | 0.14  | 1.50  | 1.39  | 1.32  | 1.39  | 0.14  | 0.52  | 1.30  | 0.56  | -0.45 | 0.82  | 0.03  | -0.27 | 0.72  | 2.96  | 0.70  | 0.68  | 2.72  | 2.02  | 1.93  | 2.66  | 1.34  | 0.92  | 2.83  |
| 0.90  | 0.49   | 2.27   | 1.78  | -0.50 | 1.02  | 1.58  | 0.72  | 0.85  | 0.46  | 1.12  | 0.66  | 2.24  | 0.59  | 0.10  | 0.50  | 1.26  | 0.36  | -0.23 | 0.63  | 1.17  | -0.45 | 0.03  | -1.23 | -0.68 | -1.25 | -1.13 | -0.32 |
| -1.65 | 1.66   | 1.16   | -0.51 | -0.15 | -0.48 | 0.93  | 0.67  | 0.83  | -0.80 | -1.13 | -0.11 | 0.47  | -0.05 | 0.25  | 1.26  | -0.55 | 0.28  | 0.22  | 1.11  | 0.26  | 0.39  | -0.54 | 0.75  | -0.72 | -0.92 | -0.24 | -2.01 |
| -3.11 |        |        |       |       |       |       |       |       |       |       |       |       |       |       |       |       |       |       |       |       |       |       |       |       |       |       |       |

|       |        |        |       |       |       |       |       |       |        |        |       |       |       |       |       |       |       |       |       |       |        |       |       |        |        |       |        |
|-------|--------|--------|-------|-------|-------|-------|-------|-------|--------|--------|-------|-------|-------|-------|-------|-------|-------|-------|-------|-------|--------|-------|-------|--------|--------|-------|--------|
| -0.76 | 0.72   | -0.17  | 1.42  | 0.13  | 0.25  | 0.06  | 1.75  | -0.37 | 0.84   | 1.09   | -0.08 | 1.76  | 0.33  | 0.32  | 0.31  | -1.05 | -0.18 | 0.42  | 0.97  | -0.83 | 0.33   | -0.52 | 0.50  | 0.24   | 0.07   | -2.79 | -1.15  |
| 0.68  | -0.57  | 0.12   | 0.10  | 0.11  | 0.30  | 1.14  | -0.23 | -0.17 | -0.13  | 1.43   | -0.04 | -0.46 | 0.76  | 0.32  | 0.19  | 0.51  | 0.25  | 0.14  | -0.07 | 0.77  | 0.49   | -0.31 | 0.20  | -0.06  | -0.40  | -1.71 | 0.62   |
| 0.14  | 0.25   | -1.44  | 1.06  | 0.12  | 0.31  | 0.54  | 0.79  | 0.60  | 1.81   | -0.84  | -0.47 | 1.96  | 0.94  | 0.14  | 0.66  | 0.00  | -0.30 | 1.00  | 1.13  | 0.19  | 0.33   | -0.28 | -0.97 | -0.06  | 1.51   | -2.44 | 0.26   |
| -0.62 | -0.83  | -2.92  | 0.89  | -1.17 | 0.48  | 1.11  | 2.42  | 0.09  | -0.02  | 0.06   | -1.70 | 1.59  | 0.96  | 0.09  | -0.48 | -0.22 | -0.18 | -0.16 | 0.12  | 0.65  | -1.41  | -0.01 | -1.59 | -1.16  | 0.08   | -3.01 | -0.97  |
| -0.71 | -2.96  | -2.62  | 0.33  | -0.50 | -0.61 | 0.16  | 0.02  | 0.49  | 0.22   | -0.20  | -0.06 | 0.42  | 0.78  | 0.30  | 0.94  | -0.19 | 0.96  | 0.34  | 0.05  | -0.38 | -0.05  | -1.52 | 0.53  | -0.48  | -1.91  | -3.48 | -0.47  |
| -0.70 | -1.28  | -3.48  | -1.19 | 0.77  | -0.15 | 2.16  | 2.08  | -0.28 | 0.22   | -0.47  | 2.44  | 2.94  | 2.40  | 0.62  | -0.38 | 0.53  | 0.26  | 0.22  | 1.84  | 1.48  | 1.86   | 1.47  | -0.08 | 1.92   | 1.24   | -1.03 | 0.71   |
| -0.39 | -0.75  | 0.09   | 0.83  | -0.55 | -1.26 | -1.00 | 0.64  | 1.32  | -0.83  | 0.47   | -0.96 | 0.14  | 1.51  | -0.66 | -1.06 | -0.01 | -0.18 | 0.30  | 0.46  | 0.29  | -0.14  | 0.36  | 0.86  | -0.16  | -0.17  | -3.63 | -0.12  |
| 0.36  | 1.64   | 1.37   | 1.72  | 0.03  | 1.08  | 2.60  | 1.79  | 0.80  | 0.75   | 1.19   | 0.05  | 1.32  | 1.15  | 2.70  | 1.93  | 0.93  | 2.96  | 1.68  | 1.38  | 1.45  | 1.51   | 0.62  | 0.43  | 1.12   | 0.56   | -0.65 | 0.80   |
| -1.19 | 3.32   | 4.79   | 2.99  | 1.53  | 3.15  | 1.01  | 0.63  | 0.32  | 1.27   | 1.39   | 1.51  | 1.77  | 0.55  | 4.55  | 5.54  | 3.14  | 3.80  | 3.69  | 1.61  | 1.38  | 0.97   | -1.20 | 1.46  | -0.81  | 0.17   | -0.38 | 0.25   |
| -0.98 | 2.21   | 1.63   | 0.69  | -4.02 | -1.97 | -1.30 | 3.82  | 6.03  | 1.31   | 4.56   | 1.53  | 1.62  | 0.50  | -0.78 | -2.50 | -2.06 | -0.79 | -1.89 | -0.29 | -0.01 | 0.16   | 0.33  | -0.42 | -2.59  | -0.15  | -0.97 | -1.28  |
| -2.71 | 0.88   | 3.53   | 1.23  | -6.49 | -7.04 | -3.25 | 4.92  | 7.02  | 3.56   | 4.57   | 5.62  | 0.99  | 1.68  | -1.35 | -1.52 | -2.64 | 0.51  | -2.01 | -2.85 | -0.18 | 0.62   | 0.93  | -1.95 | -3.01  | -4.37  | -1.38 | -3.31  |
| -3.13 | -2.25  | 3.84   | -1.99 | -4.28 | -5.32 | -3.50 | -0.63 | -5.08 | -3.69  | -2.34  | -0.10 | 2.19  | 0.40  | 2.52  | 2.74  | 1.97  | 3.01  | 1.74  | 1.13  | 1.86  | 2.54   | 0.21  | -0.55 | -2.29  | -3.10  | -0.55 | -2.72  |
| -4.35 | -15.05 | -20.12 | -7.65 | -5.42 | -4.43 | 2.87  | 3.08  | 2.44  | 3.85   | 1.25   | 3.65  | 2.28  | 5.32  | -0.25 | 1.18  | -0.92 | -0.06 | -0.20 | 0.09  | -0.97 | -11.32 | -4.26 | -8.83 | -13.99 | -12.37 | -6.82 | -14.79 |
| -3.17 | -7.99  | -10.60 | -6.91 | -6.18 | -0.59 | 0.65  | 0.46  | 0.62  | -0.33  | -1.14  | -1.25 | -1.50 | 0.34  | -1.08 | -0.75 | -0.71 | -0.62 | -0.34 | 1.30  | 0.38  | -3.76  | -2.31 | -4.31 | -3.34  | -4.41  | -3.10 | -3.66  |
| 0.48  | -0.26  | 0.43   | 0.16  | 0.08  | 0.28  | -0.33 | -1.02 | -1.53 | -0.92  | 0.96   | -1.09 | 0.19  | 0.04  | 1.09  | 0.72  | 0.58  | -1.81 | -0.39 | 0.23  | 0.39  | 0.12   | -1.47 | -0.30 | -0.58  | -0.59  | -1.47 | -0.39  |
| 1.47  | 1.20   | 2.03   | 1.27  | 1.16  | 2.67  | 2.90  | 4.05  | 3.64  | 0.80   | 2.01   | 3.00  | 1.66  | 3.59  | 0.56  | 0.12  | 0.40  | 1.15  | 0.64  | 2.11  | 1.10  | 1.37   | 0.83  | 2.57  | 2.10   | 1.01   | 0.91  | 2.95   |
| -0.79 | -0.27  | 2.05   | -0.68 | -1.04 | 0.05  | -0.19 | 0.35  | 1.00  | -0.63  | -0.12  | -0.73 | -0.93 | 0.37  | 0.50  | -0.02 | -1.18 | -0.28 | -0.42 | -1.39 | -0.57 | -0.99  | -1.48 | -1.69 | -1.84  | -0.83  | -1.46 | -1.41  |
| 1.66  | 0.50   | 2.46   | 0.92  | 2.62  | 1.81  | 2.99  | 3.04  | 3.35  | 1.93   | 1.01   | 2.19  | 3.63  | 3.46  | 3.10  | 1.55  | 1.25  | 1.64  | 2.26  | 1.68  | 1.13  | 0.28   | 1.96  | 0.96  | 0.56   | 1.11   | 1.41  | 0.90   |
| -2.05 | -2.16  | -2.02  | -0.86 | -2.10 | -1.47 | 0.54  | -3.38 | -3.00 | -4.15  | -1.22  | -2.67 | -1.54 | -0.79 | -0.50 | -1.97 | -1.79 | -1.89 | -1.23 | -0.79 | -0.72 | -2.24  | -1.14 | -3.13 | -3.12  | -2.46  | -2.74 | -2.04  |
| -0.57 | -1.22  | -1.30  | -0.51 | -1.27 | -1.45 | -1.18 | -2.04 | -1.69 | -2.18  | -1.30  | -0.81 | -1.60 | -1.01 | -1.37 | -1.23 | -1.27 | -0.41 | -1.17 | -0.78 | -0.82 | -2.47  | -2.03 | -1.92 | -1.04  | -2.13  | -2.65 | -2.01  |
| -0.77 | -1.28  | -0.68  | 0.24  | -0.23 | -0.56 | 0.45  | -1.70 | -0.77 | 0.61   | 0.17   | -0.84 | 0.87  | -0.37 | -0.98 | -1.48 | -1.06 | -1.25 | 0.06  | -1.01 | -1.11 | -3.32  | -1.21 | -0.48 | -0.01  | -1.08  | -3.26 | -1.64  |
| 1.20  | 1.76   | 1.13   | 2.25  | 0.27  | 1.86  | 2.51  | 2.74  | 3.08  | 2.79   | 2.28   | 1.04  | 2.32  | 3.96  | 0.72  | -0.63 | -0.14 | 1.93  | 0.16  | 1.05  | 0.53  | 1.43   | -0.18 | 0.78  | 0.57   | 0.22   | 0.47  | 0.12   |
| 1.42  | 2.53   | 1.18   | 2.92  | 1.92  | 2.47  | 1.24  | 0.90  | 1.29  | 0.32   | 1.90   | 1.38  | 1.77  | 0.94  | 1.68  | 1.70  | 1.14  | 0.32  | 1.88  | 1.04  | 1.54  | 2.95   | 1.95  | 2.73  | 2.73   | 2.82   | 2.01  | 3.87   |
| 0.82  | -1.77  | -2.23  | 0.55  | 0.85  | 0.52  | 2.04  | 1.03  | -0.73 | 0.45   | 1.42   | -0.05 | 0.90  | 1.31  | -0.49 | 1.28  | -0.12 | 0.22  | 0.37  | 0.60  | 2.24  | -0.64  | -0.19 | -0.72 | 0.19   | -0.62  | -1.04 | 0.66   |
| -0.30 | -1.34  | -1.52  | 0.24  | -0.09 | -0.11 | 0.80  | 3.13  | 1.89  | 1.15   | 1.80   | 3.38  | 1.97  | 0.36  | -0.29 | 0.36  | 0.23  | -0.09 | -0.07 | -0.53 | 0.24  | -1.45  | -2.97 | -2.57 | -2.52  | -1.74  | -4.07 | -1.22  |
| -1.20 | -2.84  | -3.95  | -0.08 | -1.61 | -1.71 | 2.29  | 4.13  | 3.29  | 1.73   | 1.08   | 3.77  | 3.19  | 4.29  | -0.49 | -0.56 | -0.75 | 0.81  | 0.12  | -0.61 | 0.26  | -3.04  | -3.50 | -3.03 | -4.37  | -3.02  | -3.42 | -5.15  |
| -1.85 | -4.16  | -4.52  | -0.02 | -2.55 | -3.08 | 0.05  | -0.31 | -0.68 | -1.89  | -2.74  | -0.98 | 0.77  | -1.24 | 0.49  | -0.08 | 0.38  | -0.14 | 0.03  | 3.38  | 3.30  | 2.88   | 0.67  | 1.73  | 1.80   | 0.70   | -0.71 | 2.48   |
| -3.50 | -5.05  | -6.42  | -2.53 | -0.20 | -4.45 | 1.06  | 1.76  | 0.80  | -0.29  | -1.65  | 1.98  | 0.02  | 0.58  | 1.12  | 0.31  | -0.57 | 0.18  | 0.16  | 0.04  | 1.08  | -0.40  | -1.54 | 0.78  | 0.32   | 0.16   | 0.12  | -2.12  |
| -3.79 | -7.58  | -9.37  | -2.35 | -1.34 | -5.69 | 0.82  | 1.70  | 1.03  | 1.37   | -1.42  | 1.34  | 0.30  | -0.15 | 0.95  | 0.45  | 0.54  | 2.00  | 0.92  | 0.39  | 1.12  | 0.99   | 1.26  | 0.07  | -1.34  | -0.11  | 0.25  | -1.63  |
| -3.42 | -10.09 | -4.68  | -4.10 | -1.86 | -2.93 | 2.21  | -0.94 | -3.60 | -2.02  | -2.55  | 1.38  | 1.30  | -1.02 | -0.78 | 1.36  | -0.13 | 0.96  | 0.15  | 0.14  | 0.95  | 0.28   | -0.83 | -0.80 | -0.29  | -0.76  | -0.81 | -1.63  |
| 0.11  | -0.93  | -0.14  | 0.43  | -0.51 | 0.78  | 0.46  | 1.26  | 1.28  | -1.28  | 0.30   | 0.70  | 0.87  | 1.10  | -0.02 | 0.38  | -0.37 | -0.03 | 0.63  | 0.32  | 0.11  | -1.03  | -0.77 | -0.79 | -1.08  | -0.36  | -0.98 | 1.52   |
| -0.27 | -0.53  | -0.56  | 0.11  | -0.40 | 0.44  | -0.38 | 0.22  | 0.29  | -0.10  | 0.28   | -0.58 | -0.50 | -0.75 | -0.35 | -0.21 | -0.63 | 0.03  | 0.14  | 0.34  | -0.06 | 0.43   | -0.16 | -0.52 | 1.01   | 0.34   | -0.93 | -0.62  |
| 0.63  | 0.18   | 0.01   | 1.34  | -0.46 | -0.19 | 1.47  | 1.43  | 1.23  | 0.22   | 0.13   | -0.64 | 1.62  | -0.16 | -0.04 | -0.26 | -1.34 | 0.30  | -0.51 | 0.29  | 0.13  | -1.33  | -0.73 | -0.69 | -1.10  | -0.14  | -1.74 | -0.31  |
| 0.02  | -1.19  | -0.91  | -0.13 | -0.21 | 0.12  | 0.28  | -5.97 | -8.67 | -11.41 | -10.62 | 2.39  | 1.71  | 1.07  | 1.01  | 0.25  | -0.99 | -0.56 | 0.73  | -0.23 | -1.16 | -0.22  | 0.35  | -0.35 | 0.13   | 0.44   | 0.61  | 1.32   |
| 1.06  | 1.48   | 1.20   | 0.17  | 0.06  | 1.54  | 1.17  | 1.74  | 0.62  | 2.03   | 1.70   | 0.89  | -0.93 | 1.48  | 0.62  | 0.49  | 0.41  | 1.63  | 0.97  | 0.54  | 1.19  | 1.63   | 0.50  | 0.83  | 1.60   | 1.13   | 0.03  | 0.98   |
| 1.33  | 1.70   | 2.07   | 1.61  | 0.66  | 1.64  | 1.84  | 9.30  | 9.28  | 6.23   | 6.13   | 5.36  | 1.01  | 0.91  | 1.33  | 0.25  | 1.10  | 0.06  | 0.16  | 1.75  | 0.35  | 1.63   | 1.78  | 0.96  | 2.29   | 1.55   | 2.30  | 3.53   |
| 1.22  | 1.28   | 1.12   | 1.35  | 0.99  | 1.80  | 2.10  | 1.30  | 1.32  | 1.19   | 1.62   | 1.52  | 1.67  | 1.98  | 0.95  | 0.47  | 0.78  | 1.32  | 0.59  | 1.17  | 1.76  | 1.62   | -0.10 | 0.38  | 0.88   | 0.26   | 0.47  | 0.56   |
| 1.23  | 0.56   | 1.13   | 1.40  | 0.67  | 0.50  | 1.16  | 1.29  | 1.11  | 1.23   | 1.27   | 2.04  | 0.68  | 1.90  | 0.52  | 1.23  | 1.28  | 0.88  | 0.66  | 1.02  | 0.56  | -0.02  | 1.14  | 1.33  | 1.41   | 0.63   | 1.13  | 1.82   |
| 0.78  | 0.20   | 1.03   | 0.54  | -1.48 | -0.04 | 1.53  | 0.56  | -0.17 | 2.59   | 1.59   | -0.11 | 1.29  | 1.10  | 1.28  | 0.14  | 0.18  | 0.70  | 0.34  | 0.39  | 0.74  | 2.33   | -1.13 | 2.77  | 1.68   | 0.07   | 0.32  | -0.72  |
| -1.87 | -1.11  | -1.84  | -0.38 | -1.03 | -0.32 | 0.26  | 1.14  | 0.41  | 0.94   | 0.90   | 0.94  | 0.90  | 0.54  | 0.39  | 0.38  | -0.01 | -0.57 | -0.23 | 0.94  | 0.24  | -1.81  | -0.55 | 0.19  | 0.81   | 0.16   | -0.43 | -0.90  |
| -0.22 | -0.31  | -0.40  | 0.44  | -1.12 | 0.25  | 0.72  | 0.39  | -0.28 | -0.77  | 0.42   | 0.37  | 0.32  | 1.14  | 0.56  | 1.01  | -0.08 | 0.56  | 0.21  | 0.51  | 0.63  | 0.57   | 0.14  | 0.27  | -0.34  | -0.82  | -1.09 | -0.04  |
| 1.36  | 2.90   | 2.39   | 1.71  | 0.64  | 3.67  | 1.11  | 2.23  | 0.67  | 1.74   | 2.25   | 1.45  | 1.20  | -0.55 | -1.18 | 0.30  | -0.53 | 0.26  | 0.65  | -0.53 | 1.21  | 1.99   | -1.37 | 1.38  | 0.56   | -0.32  | 1.65  | -0.05  |
| 0.91  | -0.03  | 2.12   | 2.47  | 0.52  | 1.13  | 2.21  | 2.03  | 0.94  | 0.58   | 1.22   | 2.08  | 2.32  | 0.69  | 0.63  | 0.90  | 0.17  | 0.49  | 3.02  | 2.56  | 0.61  | 3.69   | 4.10  | 3.06  | 3.69   | 1.39   | 1.99  | 3.93   |
| 1.30  | 1.35   | 2.25   | 2.65  | -0.26 | 1.62  | 1.33  | 1.26  | 0.50  | 0.59   | 0.79   | 1.00  | 0.21  | 0.74  | 0.30  | 0.43  | 1.08  | 0.10  | -0.58 | 0.17  | 1.35  | -0.73  | -0.90 | -0.61 | -0.52  | -1.10  | -0.88 | -0.94  |
| -0.61 | -0.72  | 0.20   | 0.53  | -0.03 | -0.41 | 1.17  | 1.17  | 0.85  | -1.23  | 0.50   | -0.27 | 2.02  | 1.33  | -0.92 | 0.46  | -1.01 | -0.28 | 0.07  | 0.05  | 0.13  | 0.48   | -1.41 | -0.37 | -0.86  | -2.56  | -0.66 | -0.38  |
| -4.95 | -2.99  | -6.24  | -2.52 | -4.32 | -5.59 | -0.15 | 2.35  | 0.16  | -0.99  | -0.39  | 0.03  | -0.30 | 0.42  | 0.78  | 0.00  | -1.63 | 1.85  | 0.06  | -0.07 | 0.06  | 0.86   | 0.59  | 0.36  | -0.66  | -1.14  | -0.97 | -2.28  |
| -3.52 | -2.75  | -8.05  | -3.82 | -2.09 | -7.17 | -0.21 | 1.00  | 1.02  | 1.38   | -0.42  | 0.74  | 0.68  | 1.13  | 0.13  | 1.21  | -0.95 | 1.88  | 0.35  | 0.46  | 1.50  | 0.80   | 0.48  | 0.85  | -1.81  | 0.70   | -0.02 | -1.87  |
| -7.26 | -6.63  | -4.91  | -4.01 | -5.66 | -6.94 | 1.27  | -0.26 | -2.62 | -3.11  | -3.40  | -1.94 | -0.61 | -2.04 | 0.57  | 0.77  | 1.04  | 1.65  | 1.90  | 0.44  | 1.70  | 0.05   | -1.44 | 0.04  | -1.71  | -1.52  | 0.03  | -2.70  |

|       |        |        |       |       |       |       |       |       |        |        |       |       |       |       |       |       |       |       |       |       |        |       |        |        |        |        |        |
|-------|--------|--------|-------|-------|-------|-------|-------|-------|--------|--------|-------|-------|-------|-------|-------|-------|-------|-------|-------|-------|--------|-------|--------|--------|--------|--------|--------|
| -0.42 | -2.70  | -2.86  | 1.18  | -0.90 | -0.57 | 0.48  | 2.58  | 0.46  | 0.37   | 0.67   | -0.43 | 1.88  | 2.15  | -0.01 | 0.04  | 0.20  | 0.40  | 0.29  | -0.14 | 0.08  | -0.87  | 0.14  | -1.37  | -1.28  | -0.98  | -5.12  | -1.26  |
| -0.80 | -2.59  | -2.72  | 0.32  | -0.33 | -0.01 | 0.77  | 0.48  | 0.94  | 0.42   | 1.45   | 0.16  | 0.82  | 1.59  | 0.54  | 0.12  | 0.50  | 0.30  | 0.49  | 0.45  | 0.19  | -0.50  | -0.77 | -0.51  | -1.40  | -1.98  | -3.90  | -1.10  |
| -1.80 | -2.20  | -4.34  | -1.29 | 0.05  | -2.13 | -0.62 | 1.90  | 0.68  | -0.30  | -0.38  | 2.19  | 2.53  | 1.92  | -1.63 | -0.27 | 0.39  | 0.79  | 0.66  | 1.57  | 1.70  | 0.82   | 0.37  | 2.98   | 2.17   | 0.74   | -1.24  | 1.37   |
| 0.15  | -0.43  | -0.63  | 1.47  | 0.54  | 0.11  | 0.61  | 0.77  | 0.86  | -1.20  | 1.69   | -1.26 | -0.70 | 0.98  | -0.83 | -0.82 | 0.78  | 0.64  | -0.27 | -0.33 | -1.08 | 0.15   | -0.30 | 0.99   | -0.52  | -0.92  | -3.97  | 1.48   |
| 0.36  | 1.97   | 2.76   | 2.09  | 0.84  | 1.79  | 2.21  | 2.15  | 1.69  | 1.03   | 1.14   | -0.02 | 1.59  | 2.54  | 2.75  | 1.92  | 1.51  | 2.77  | 2.29  | 1.30  | 2.39  | 2.01   | 1.68  | 1.14   | 1.83   | 0.87   | -0.53  | 0.65   |
| 0.83  | 3.72   | 5.51   | 4.28  | 1.03  | 3.77  | 1.31  | 0.91  | -0.15 | -0.19  | 2.48   | 0.44  | 2.07  | -0.25 | 5.60  | 0.68  | 3.39  | 4.37  | 4.55  | 3.02  | 1.21  | 0.72   | 0.67  | 1.95   | 1.07   | 0.21   | -1.05  | 1.64   |
| 1.77  | 5.49   | 3.52   | 3.65  | -0.84 | 0.02  | 1.22  | 6.40  | 9.69  | 3.05   | 5.99   | 2.82  | 4.21  | 3.12  | -1.64 | -2.32 | -1.69 | -1.20 | -1.96 | -0.72 | 0.16  | 0.54   | 1.92  | 0.22   | -5.24  | 0.96   | -2.46  | -0.17  |
| 5.36  | 7.07   | 3.83   | 5.63  | -3.16 | -3.58 | -1.21 | 6.26  | 15.81 | 8.30   | 10.15  | 8.35  | 3.84  | 4.75  | -0.87 | -0.03 | -2.78 | 1.45  | -1.99 | -3.08 | 0.89  | 1.11   | 1.38  | -2.01  | -4.92  | -0.49  | -1.65  | -3.50  |
| -1.45 | -2.21  | 0.14   | -4.37 | -5.38 | -6.53 | -3.46 | -0.92 | -3.67 | -5.87  | -4.55  | 1.14  | 1.81  | -0.99 | 2.62  | 4.41  | 1.73  | 3.23  | 1.32  | 0.64  | 0.68  | 1.56   | 0.99  | -0.36  | -3.70  | -0.88  | -1.72  | -0.16  |
| -1.83 | -10.16 | -15.33 | -4.21 | -2.52 | -2.50 | 4.31  | 3.39  | 4.69  | 7.16   | 7.31   | 4.70  | 5.08  | 8.65  | -1.14 | -0.77 | -0.67 | -0.76 | -1.53 | -0.96 | -1.88 | -18.67 | -9.45 | -13.43 | -24.14 | -22.16 | -13.01 | -24.94 |
| -3.97 | -6.09  | -9.41  | -8.39 | -6.28 | 0.03  | 0.74  | 0.86  | 1.96  | 0.52   | 0.41   | 0.33  | -0.79 | 1.09  | -1.01 | -1.04 | -1.61 | -0.74 | -0.02 | -0.34 | 0.09  | -6.03  | -2.37 | -6.26  | -6.89  | -6.11  | -3.40  | -6.32  |
| 0.87  | -0.46  | 0.86   | 0.62  | 0.17  | 0.61  | -0.01 | -0.53 | -1.81 | -0.39  | 0.80   | -2.25 | 0.15  | 0.12  | -0.13 | 0.13  | -0.07 | -0.79 | -0.24 | -0.38 | 0.06  | 0.24   | -1.15 | -0.34  | -0.18  | -0.59  | -1.64  | -0.60  |
| 1.66  | 1.94   | 1.07   | 0.95  | 1.53  | 1.30  | 3.12  | 3.87  | 3.75  | -0.10  | 1.97   | 2.21  | 0.69  | 4.39  | 1.10  | 0.34  | 1.79  | 0.70  | 0.72  | 1.95  | 0.86  | 1.76   | 1.65  | 3.44   | 3.10   | 0.67   | 1.40   | 4.37   |
| -1.61 | -0.32  | -1.43  | -0.90 | -1.44 | -0.14 | -0.29 | 0.08  | -0.19 | -0.50  | 0.68   | -0.17 | -1.12 | -0.37 | -1.66 | -0.53 | -1.61 | -0.02 | -0.54 | -1.52 | -0.82 | -1.81  | -1.51 | -2.00  | -1.97  | -1.08  | -2.52  | -1.80  |
| 3.62  | 1.95   | 2.26   | 1.69  | 3.39  | 2.00  | 2.39  | 3.18  | 2.93  | 1.84   | 1.12   | 1.43  | 3.85  | 4.58  | 2.74  | 1.90  | 1.34  | 1.07  | 1.11  | 2.52  | 0.92  | 1.47   | 2.65  | 2.60   | 1.60   | 4.00   | 1.16   | 1.57   |
| -2.71 | -2.21  | -2.79  | -0.87 | -1.84 | -2.08 | 0.61  | -3.80 | -2.69 | -2.71  | -1.16  | -1.86 | -1.63 | -1.24 | -2.16 | -1.53 | -1.52 | -1.12 | -1.59 | -1.08 | -1.23 | -3.08  | -2.59 | -3.71  | -3.68  | -2.43  | -5.19  | -2.26  |
| -1.28 | -0.79  | -1.18  | -1.55 | -1.38 | -1.77 | -1.87 | -2.55 | -1.98 | -2.82  | -1.07  | -0.66 | -1.83 | -0.45 | -1.94 | -1.00 | -1.39 | -1.20 | -1.61 | -1.26 | -1.48 | -1.08  | -2.28 | -3.17  | -1.81  | -3.17  | -4.26  | -2.74  |
| 0.06  | -1.15  | -1.05  | 1.12  | 1.08  | -1.12 | 1.72  | -0.95 | -0.70 | 1.46   | 0.28   | -0.10 | 0.86  | -0.96 | -0.42 | -0.68 | 0.30  | -0.78 | 0.43  | -1.07 | -0.42 | -3.43  | -2.01 | -0.59  | -0.81  | -0.17  | -3.79  | -0.30  |
| 2.17  | 1.64   | 3.54   | 2.86  | 0.10  | 0.92  | 3.71  | 3.33  | 3.54  | 2.97   | 3.58   | 1.58  | 3.53  | 4.40  | 1.16  | -0.38 | 0.28  | 0.74  | 0.47  | 1.88  | 0.21  | 2.30   | -0.64 | 1.41   | 1.28   | 1.19   | -0.17  | 0.55   |
| 1.62  | 2.70   | 4.12   | 2.97  | 2.19  | 3.74  | 1.20  | 1.15  | 1.17  | 0.79   | 2.64   | 2.17  | 1.50  | 1.57  | 2.11  | 2.08  | 1.52  | 1.09  | 1.59  | 1.56  | 1.85  | 4.34   | 3.11  | 3.39   | 3.81   | 3.22   | 2.51   | 4.94   |
| 1.42  | -1.77  | -0.26  | 0.69  | 1.41  | 0.43  | 1.34  | 0.84  | 1.10  | 1.59   | 0.72   | 0.05  | 1.70  | 1.78  | 0.31  | 1.32  | -0.06 | 0.53  | 0.10  | 0.49  | 0.26  | 0.44   | -1.53 | -0.60  | -0.96  | 0.56   | -1.30  | 1.65   |
| -0.30 | -1.88  | -1.48  | 1.18  | 2.01  | 0.32  | 2.63  | 4.54  | 3.07  | 1.54   | 2.64   | 4.68  | 3.48  | 1.39  | 0.54  | -0.58 | -0.53 | -0.27 | -1.02 | -0.54 | -0.01 | -1.49  | -3.74 | -2.60  | -4.77  | -2.86  | -5.30  | -2.49  |
| -0.17 | -3.84  | -4.04  | 1.24  | -0.18 | -0.59 | 3.20  | 6.60  | 5.70  | 2.63   | 3.88   | 6.77  | 4.81  | 6.27  | -1.68 | -1.74 | -1.48 | 0.67  | -1.25 | -1.34 | -0.17 | -4.64  | -4.91 | -4.86  | -6.75  | -4.47  | -5.93  | -6.63  |
| -2.06 | -5.50  | -6.50  | -1.61 | -3.46 | -4.39 | 0.62  | -2.52 | -0.73 | -2.04  | -2.67  | -1.81 | 0.37  | -1.91 | 0.22  | 1.12  | 1.34  | 0.79  | 0.74  | 2.92  | 2.24  | 3.52   | 0.62  | 2.61   | 3.99   | 0.88   | 9.00   | 3.02   |
| -4.87 | -6.92  | -8.50  | -2.74 | -2.10 | -5.31 | 0.38  | 2.57  | 0.57  | 0.19   | -1.34  | 2.33  | 0.46  | 0.59  | 1.33  | 0.30  | -0.70 | 0.45  | 0.55  | 0.08  | 0.44  | 0.41   | -1.47 | -0.28  | 0.99   | 0.61   | -0.54  | -1.03  |
| -4.68 | -8.38  | -11.83 | -2.75 | -3.27 | -6.47 | 0.86  | 3.19  | 1.94  | 1.84   | -0.69  | 2.06  | 0.74  | 0.72  | 0.98  | 0.55  | -0.17 | 2.01  | 0.88  | 0.78  | 1.43  | 1.90   | 1.09  | 0.14   | -1.42  | 0.41   | 0.38   | -2.02  |
| -5.84 | -11.99 | -7.23  | -4.71 | -4.03 | -4.57 | 1.88  | -1.56 | -3.00 | -3.78  | -3.83  | -0.19 | -0.16 | -1.02 | 0.51  | 0.43  | 1.87  | 0.99  | 0.02  | -0.57 | 0.28  | 0.64   | 0.13  | 0.60   | -0.43  | 0.01   | -2.38  | -2.21  |
| -0.53 | -0.13  | 0.16   | -0.19 | -0.06 | 0.77  | 1.12  | 0.46  | 0.74  | -0.96  | 0.72   | 1.01  | 0.17  | 1.06  | 0.74  | -0.23 | -0.33 | -0.35 | 0.21  | 0.27  | 0.04  | -1.08  | -0.56 | -1.12  | -0.78  | -0.51  | -1.73  | 0.97   |
| -0.89 | 0.12   | -0.16  | -0.68 | -0.32 | -0.22 | -0.51 | -0.04 | 1.06  | -0.14  | 0.50   | -0.63 | -0.42 | 1.41  | -0.82 | 0.01  | -0.69 | 0.09  | -0.24 | 0.01  | -0.15 | 0.65   | -0.04 | -0.77  | 0.34   | -0.34  | -0.41  | -1.12  |
| 0.85  | 0.37   | 0.53   | 1.49  | 0.29  | -0.53 | 1.21  | 1.18  | 1.18  | -1.34  | 0.94   | -0.94 | 2.04  | 0.79  | -0.10 | -0.13 | -0.79 | 0.37  | -1.08 | 0.10  | 0.23  | -1.40  | -0.59 | -2.08  | -1.03  | -2.98  | -0.01  | -0.01  |
| 0.88  | -1.61  | -0.42  | -0.83 | -0.31 | 0.23  | 0.77  | -1.12 | -9.81 | -14.10 | -12.87 | 3.12  | 1.24  | 1.60  | 0.12  | -0.15 | -1.25 | -0.88 | 0.07  | 0.00  | -0.99 | -0.81  | 1.06  | 0.87   | 0.37   | 0.18   | -0.52  | 0.52   |
| 0.83  | 2.05   | 0.95   | -0.47 | 0.94  | 1.41  | 1.50  | 1.81  | 1.56  | 1.50   | 2.52   | 1.42  | -0.32 | 2.74  | 0.84  | 0.37  | 0.96  | 1.99  | 1.45  | 0.73  | 1.14  | 2.31   | -0.41 | 1.03   | 1.38   | 1.00   | 0.15   | 1.70   |
| 1.97  | 2.43   | 2.22   | 1.64  | -0.37 | 1.51  | 2.14  | 10.25 | 11.06 | 8.88   | 7.51   | 5.71  | 0.79  | 0.39  | 0.62  | 0.16  | 0.82  | 0.50  | 0.95  | 1.99  | 0.61  | 0.72   | 0.47  | 0.97   | 1.21   | 1.24   | 1.81   | 3.33   |
| 0.78  | 1.37   | 0.49   | 1.55  | 1.26  | 1.69  | 2.17  | 1.63  | 1.62  | 0.66   | 2.14   | 3.08  | 1.92  | 2.74  | 2.84  | 0.68  | 1.14  | 1.78  | 1.07  | 1.07  | 2.12  | 1.46   | 0.90  | 1.12   | 0.34   | 1.06   | 0.85   | 0.77   |
| 1.17  | 0.53   | 1.39   | 0.98  | 0.75  | 0.70  | 1.09  | 1.61  | 2.03  | 2.18   | 2.53   | 2.23  | 0.86  | 2.83  | 0.46  | 1.16  | 1.30  | 1.09  | 0.91  | 1.12  | 0.45  | 1.26   | 1.13  | 1.15   | 2.15   | 0.06   | 1.13   | 1.74   |
| -1.49 | 0.42   | 1.36   | 0.97  | 1.69  | 0.33  | 2.64  | 2.51  | 1.86  | 2.09   | 1.36   | -0.16 | 1.93  | 0.43  | 0.05  | 0.93  | 1.01  | 1.32  | 0.57  | 0.64  | 1.15  | -0.07  | 1.16  | 1.52   | 1.98   | 0.19   | 0.06   | -0.67  |
| -0.83 | -1.72  | -1.81  | -1.58 | -1.10 | -1.29 | 1.23  | 1.37  | 0.32  | 0.68   | 1.39   | 2.93  | 1.39  | 0.74  | 0.71  | 0.92  | 0.32  | 0.11  | -0.37 | 0.16  | 0.48  | -0.44  | -0.63 | -0.74  | 0.32   | -0.93  | -0.50  | -0.97  |
| -0.56 | -0.22  | -0.92  | -0.77 | -1.07 | 0.80  | -0.18 | 0.86  | 0.37  | -0.15  | 1.49   | 0.58  | 1.29  | 1.46  | -0.70 | 0.12  | 0.55  | -0.06 | 0.35  | 0.14  | 0.35  | 0.88   | 0.51  | 1.43   | -0.73  | -0.89  | -1.33  | -1.13  |
| 0.10  | 0.99   | 0.43   | 1.96  | 1.02  | 1.10  | 1.58  | 1.94  | 0.29  | 1.08   | 1.75   | 1.90  | 1.36  | 0.88  | 0.34  | 0.73  | 0.39  | -0.21 | 0.41  | 0.31  | 1.38  | 0.81   | 0.07  | 1.12   | 0.25   | 1.14   | 0.95   | -0.13  |
| 0.71  | 0.82   | 1.58   | 2.17  | -0.05 | 1.16  | 1.82  | 2.44  | 0.92  | 2.72   | 1.68   | 3.02  | 1.69  | 1.95  | 0.65  | 0.50  | 1.11  | 1.30  | 2.74  | 2.32  | 1.23  | 5.87   | 5.50  | 4.59   | 5.61   | 2.11   | 2.71   | 6.42   |
| 2.11  | 2.13   | 3.72   | 3.08  | 1.19  | 2.54  | 1.27  | 1.32  | 0.37  | 0.46   | 0.84   | 0.74  | 0.83  | 1.47  | 0.91  | 0.74  | 0.88  | 0.19  | 1.12  | -0.50 | 0.67  | -0.94  | -0.92 | -0.86  | -1.47  | -0.93  | -1.32  | -0.94  |
| -0.73 | 0.68   | 0.88   | 0.98  | -0.61 | -1.61 | 0.68  | 1.26  | 0.56  | -1.33  | 0.80   | 0.40  | 1.11  | 0.84  | -1.23 | 0.49  | -1.28 | 0.43  | -0.15 | 0.74  | 1.15  | -1.01  | -0.94 | -1.05  | -2.32  | -1.86  | -2.27  | -0.53  |
| -4.61 | -3.92  | -4.78  | -2.86 | -4.06 | -6.33 | -0.81 | 2.40  | 0.67  | -0.84  | -0.41  | 1.68  | 0.24  | 1.06  | 0.38  | 0.44  | -1.67 | 1.99  | -0.08 | -0.16 | -0.07 | 1.65   | 0.67  | 1.05   | 0.28   | -1.74  | 0.26   | -2.75  |
| -3.81 | -3.82  | -9.14  | -4.23 | -2.12 | -8.71 | 0.12  | 1.84  | 1.50  | 1.27   | 0.04   | 1.37  | 1.14  | 0.37  | 0.58  | 0.46  | -0.27 | 2.04  | 0.38  | 0.16  | 1.30  | 0.57   | 0.47  | 1.03   | -1.77  | 0.80   | 0.17   | -1.89  |
| -7.42 | -9.47  | -5.49  | -7.08 | -7.32 | -9.11 | 0.14  | -1.60 | -3.46 | -3.89  | -4.02  | -3.36 | -0.82 | -2.20 | 1.58  | 0.71  | 1.51  | 1.65  | 1.79  | 0.16  | 1.87  | 0.00   | 0.80  | -0.59  | -1.37  | -1.24  | 0.32   | -4.54  |
| 1.01  | 3.39   | 2.21   | 0.93  | -3.37 | -1.74 | 1.29  | -0.13 | 0.34  | 0.66   | 1.43   | 3.97  | 3.08  | 3.87  | -1.86 | -0.49 | 1.21  | 0.09  | 0.02  | 0.88  | 1.02  | -0.67  | -0.98 | -0.58  | 0.19   | -1.38  | -1.36  | -0.88  |
| 1.57  | 1.41   | 2.14   | -0.36 | 1.77  | 0.10  | 1.71  | -0.45 | 0.26  | 0.53   | 0.12   | 1.97  | 1.43  | 3.94  | 2.24  | 3.29  | 3.03  | 3.17  | 2.86  | 2.41  | 2.90  | 0.36   | -0.36 | 1.04   | 0.50   | 0.14   | -1.25  | -0.37  |
| 0.47  | -1.52  | -1.83  | -0.57 | 1.66  | -2.35 | 2.61  | 0.66  | 1.36  | 1.71   | -0.28  | 0.53  | 1.18  | 0.79  | 1.92  | 1.62  | 0.49  | 1.32  | 0.34  | 2.78  | 1.97  | 1.52   | 0.96  | 1.70   | -0.08  | 2.01   | 0.41   | -0.03  |

|        |        |        |        |        |        |       |       |        |        |        |        |        |        |       |       |       |       |       |       |       |        |        |        |        |        |        |        |
|--------|--------|--------|--------|--------|--------|-------|-------|--------|--------|--------|--------|--------|--------|-------|-------|-------|-------|-------|-------|-------|--------|--------|--------|--------|--------|--------|--------|
| -0.48  | 0.11   | -1.01  | 0.15   | 0.23   | 0.49   | 0.57  | 0.94  | 0.77   | -0.85  | 2.11   | -1.41  | -0.09  | 1.54   | 0.21  | -0.79 | -0.67 | 0.51  | 0.30  | 0.19  | -0.63 | 0.06   | -0.45  | 1.61   | 0.08   | -0.64  | -0.75  | -0.45  |
| 0.33   | 2.29   | 2.85   | 2.96   | 0.71   | 2.50   | 2.81  | 2.09  | 2.25   | 0.96   | 1.51   | -0.07  | 1.73   | 2.74   | 2.66  | 2.10  | 1.85  | 2.84  | 2.74  | 1.88  | 2.46  | 1.43   | 1.77   | 1.15   | 1.33   | 1.21   | -2.77  | 1.74   |
| -0.40  | 4.43   | 6.35   | 2.72   | 1.77   | 4.52   | 1.81  | 1.12  | -0.68  | 0.72   | 1.66   | -0.74  | 2.23   | 1.01   | 7.49  | 0.88  | 3.56  | 3.95  | 4.79  | 1.80  | 2.23  | 1.01   | -0.43  | 2.97   | -0.53  | 0.38   | -3.41  | 1.79   |
| 4.15   | 8.18   | 8.23   | 6.40   | 0.88   | 4.19   | 3.85  | 8.43  | 13.58  | 5.85   | 11.61  | 4.04   | 5.07   | 6.41   | -0.80 | -0.63 | -2.36 | -1.19 | -1.82 | -1.08 | 0.31  | 1.85   | 1.11   | -0.13  | -4.14  | -0.31  | -4.52  | -0.67  |
| 6.43   | 12.10  | 9.95   | 10.52  | 0.45   | 3.90   | 3.04  | 10.66 | 22.57  | 13.58  | 17.63  | 12.89  | 5.62   | 9.11   | -0.51 | 1.31  | -2.97 | 2.63  | 0.54  | -0.54 | 1.72  | 2.22   | 2.15   | -1.44  | -5.75  | -3.63  | -2.52  | -4.18  |
| -7.09  | -7.74  | -5.60  | -7.33  | -8.81  | -9.76  | -4.77 | -3.57 | -5.39  | -7.91  | -4.74  | -0.81  | 0.03   | -3.12  | 1.73  | 3.29  | 2.79  | 2.86  | 0.42  | 1.48  | 0.76  | 1.30   | 0.57   | -1.29  | -5.57  | -3.32  | -3.55  | -2.01  |
| 2.53   | -3.19  | -6.76  | 1.06   | 1.13   | 1.85   | 6.78  | 5.80  | 8.04   | 13.24  | 12.17  | 5.70   | 7.53   | 12.25  | -3.11 | -1.78 | -2.27 | -1.06 | -1.94 | -2.03 | -2.71 | -27.89 | -14.83 | -21.43 | -36.31 | -31.53 | -20.59 | -36.17 |
| -3.12  | -3.34  | -7.30  | -7.29  | -6.50  | 0.45   | 1.14  | 0.94  | 1.18   | 1.06   | 0.83   | 0.58   | -0.51  | 2.26   | -1.90 | -1.37 | -1.48 | -0.71 | -0.63 | -0.54 | -0.33 | -8.71  | -4.41  | -8.24  | -9.41  | -9.12  | -7.23  | -9.43  |
| 0.50   | -0.69  | 0.52   | 0.43   | -0.39  | 0.68   | -1.39 | -1.63 | -0.69  | -0.93  | 0.46   | -1.72  | -0.76  | -0.45  | 0.27  | 0.73  | -0.40 | -0.84 | -0.62 | -0.37 | 0.33  | -0.36  | -1.54  | -0.66  | 0.08   | -0.58  | -0.65  | -0.77  |
| 3.22   | 1.19   | 1.47   | 1.19   | 0.63   | 1.88   | 2.63  | 4.84  | 4.00   | 0.14   | 2.24   | 2.10   | 1.46   | 5.49   | 1.27  | 0.86  | 1.35  | 1.43  | 1.47  | 1.38  | 1.86  | 2.14   | 1.29   | 2.17   | 1.78   | 1.39   | 1.57   | 2.47   |
| -1.54  | -0.45  | -1.85  | -0.91  | -1.62  | -0.64  | 0.10  | 0.25  | -0.35  | -0.26  | 0.31   | -0.53  | -1.32  | -0.19  | -1.76 | 0.07  | -2.04 | -0.70 | -0.66 | -1.32 | -1.46 | -1.78  | -0.95  | -2.37  | -2.36  | -1.21  | -3.33  | -2.02  |
| 3.23   | 1.01   | 2.50   | 1.17   | 3.06   | 2.76   | 3.24  | 1.97  | 2.65   | 1.81   | 2.24   | 1.53   | 4.66   | 3.63   | 4.50  | 2.08  | 1.18  | 1.43  | 1.94  | 2.88  | 2.06  | 1.68   | 1.92   | 3.11   | 2.13   | 2.04   | 1.58   | 1.47   |
| -2.17  | -2.37  | -2.17  | -0.36  | -1.59  | -2.63  | 0.28  | -3.52 | -3.65  | -2.48  | -1.86  | -1.46  | -1.43  | -0.49  | -2.35 | -1.64 | -2.38 | -1.34 | -1.46 | -1.35 | -1.32 | -3.78  | -2.38  | -4.27  | -6.37  | -3.10  | -8.02  | -3.13  |
| -0.83  | -1.37  | -1.34  | -0.57  | -1.25  | -1.30  | -2.10 | -2.94 | -2.20  | -3.14  | -0.55  | -0.23  | -1.67  | -0.71  | -1.95 | -1.86 | -1.54 | -1.44 | -1.85 | -1.01 | -1.64 | -3.56  | -3.40  | -3.67  | -2.19  | -3.34  | -7.32  | -2.59  |
| -0.90  | -0.34  | -1.40  | 0.43   | 1.14   | -0.12  | 1.38  | -1.67 | -1.60  | 0.41   | -1.55  | -0.96  | 1.61   | -0.63  | -0.86 | -0.82 | -0.70 | -0.41 | -0.95 | -0.64 | 0.19  | -4.07  | -2.68  | -0.06  | 0.28   | -1.91  | -7.73  | -1.64  |
| 1.69   | 0.66   | 3.50   | 3.21   | 0.96   | 2.26   | 3.99  | 4.09  | 3.74   | 3.48   | 4.15   | 2.14   | 3.34   | 3.83   | 1.34  | -0.39 | 0.84  | 0.54  | 1.10  | 2.08  | 1.02  | 3.48   | -0.03  | 2.42   | 1.11   | 1.93   | -2.11  | 1.69   |
| 1.61   | 3.24   | 3.71   | 3.52   | 2.24   | 4.33   | 1.31  | 1.31  | 1.24   | 0.86   | 2.02   | 1.76   | 1.95   | 2.00   | 2.36  | 2.28  | 1.95  | 1.19  | 2.32  | 1.97  | 2.40  | 4.65   | 3.82   | 4.95   | 5.35   | 4.10   | 2.40   | 5.65   |
| 1.58   | -2.27  | -2.86  | 1.31   | 1.29   | 1.33   | 2.44  | 0.73  | 1.21   | 1.04   | 2.53   | 0.51   | 1.95   | 2.33   | 0.91  | 1.01  | 0.01  | 0.16  | -0.22 | 1.12  | 0.68  | 0.18   | -1.09  | -1.10  | -0.17  | 1.40   | -1.24  | 0.28   |
| 0.90   | -1.02  | -0.34  | 2.17   | 0.66   | 1.06   | 3.70  | 7.01  | 5.17   | 3.24   | 3.87   | 6.79   | 4.51   | 3.83   | -1.75 | -0.78 | -2.14 | -1.06 | -1.21 | -1.28 | -2.28 | -2.98  | -5.32  | -4.38  | -6.01  | -3.31  | -8.25  | -4.42  |
| 1.50   | -2.91  | -3.34  | 4.00   | 1.96   | 0.20   | 6.22  | 10.14 | 8.83   | 5.53   | 7.47   | 9.79   | 7.60   | 9.21   | -2.39 | -3.52 | -3.55 | -0.55 | -2.66 | -2.78 | -1.76 | -6.97  | -6.90  | -5.56  | -8.28  | -5.54  | -9.50  | -7.56  |
| -3.49  | -6.62  | -6.81  | -3.41  | -5.37  | -5.83  | -0.24 | -3.13 | -3.52  | -1.24  | -3.64  | -3.18  | -2.66  | -3.51  | 1.32  | 1.83  | 2.16  | 0.51  | 1.77  | 3.81  | 2.98  | 3.39   | 1.79   | 2.56   | 5.10   | 1.91   | 0.32   | 3.86   |
| -4.13  | -6.25  | -10.26 | -3.58  | -1.74  | -5.57  | 1.87  | 1.87  | 1.10   | -0.15  | -1.61  | 1.95   | 0.43   | 2.54   | 1.25  | 0.27  | -0.20 | 1.17  | 0.68  | 0.24  | 0.65  | -0.07  | -1.39  | 0.71   | 0.23   | -0.18  | -1.98  | -2.08  |
| -4.17  | -7.97  | -13.23 | -3.06  | -2.82  | -6.80  | 1.71  | 2.67  | 2.55   | 2.14   | 0.02   | 2.37   | 0.79   | 2.09   | 1.18  | 0.31  | 0.52  | 1.73  | 1.01  | 0.77  | 1.51  | 1.57   | 0.73   | 0.39   | -1.42  | 0.48   | 0.42   | -2.12  |
| -6.09  | -13.41 | -10.48 | -7.53  | -8.81  | -7.36  | 1.15  | -1.63 | -4.23  | -6.03  | -4.80  | -1.30  | -0.11  | -1.57  | -0.99 | -0.18 | 1.33  | 0.38  | -0.08 | 0.31  | -0.06 | -0.25  | -0.15  | -0.55  | -1.48  | -0.20  | -4.71  | -2.53  |
| -0.32  | 0.95   | -0.37  | 0.24   | -0.45  | 0.79   | 1.02  | 1.13  | 0.99   | -0.97  | 0.54   | 0.75   | 0.30   | 0.30   | -0.39 | 0.21  | -1.34 | 0.00  | 0.53  | -0.32 | 1.14  | -0.43  | -0.46  | -1.74  | -1.71  | -0.48  | -4.53  | 0.25   |
| 0.26   | -0.49  | -1.11  | -0.02  | -0.35  | -0.11  | -0.64 | 0.40  | -0.28  | -0.77  | 0.10   | -0.99  | -0.50  | 0.88   | -0.38 | -0.34 | -0.55 | 0.08  | 0.41  | 0.52  | -0.72 | -0.37  | 0.34   | -0.19  | 0.89   | -0.10  | -1.04  | -0.48  |
| 1.52   | 1.14   | 0.47   | 0.91   | -0.35  | 0.26   | 1.62  | 2.44  | 1.94   | 2.26   | 0.25   | -0.90  | 0.24   | 1.85   | -0.38 | 0.14  | -1.30 | 0.30  | -0.63 | 0.25  | -0.03 | -2.53  | -2.52  | -3.32  | -2.28  | -1.39  | -4.59  | -0.91  |
| -0.26  | -1.33  | 0.06   | -1.38  | -0.60  | 0.32   | 1.47  | -8.82 | -9.63  | -15.23 | -13.40 | 3.50   | 1.93   | 2.27   | -0.05 | -0.13 | -0.93 | -1.02 | -0.01 | -0.77 | -0.94 | -2.62  | 0.39   | 0.10   | 0.78   | 0.29   | -0.77  | 0.26   |
| 1.47   | 1.72   | 0.04   | -0.80  | 0.79   | 1.32   | 1.14  | 1.07  | 0.77   | 1.62   | 2.04   | 1.40   | -0.38  | 1.80   | 0.68  | 0.14  | 0.65  | 1.64  | 1.58  | 1.21  | 0.91  | 1.71   | 1.05   | 0.14   | 1.21   | 1.02   | -0.32  | 1.88   |
| 0.90   | 1.64   | 2.47   | 1.07   | -0.65  | 1.42   | 2.81  | 12.43 | 13.52  | 11.01  | 10.29  | 5.79   | 0.93   | 1.47   | 1.97  | 0.37  | 0.34  | 0.21  | 1.01  | 2.71  | 0.42  | 0.20   | 0.92   | 2.10   | 3.02   | 1.33   | 0.64   | 5.02   |
| 2.59   | 1.90   | 1.59   | 1.64   | 1.32   | 1.47   | 2.25  | 2.06  | 1.56   | 1.94   | 2.94   | 2.99   | 1.62   | 3.30   | 2.03  | 0.59  | 1.23  | 1.33  | 1.62  | 2.32  | 2.79  | 1.88   | 0.44   | 1.26   | 2.08   | 1.45   | 0.12   | 0.11   |
| 1.29   | 0.85   | 1.13   | 2.10   | 0.94   | 1.11   | 1.09  | 1.30  | 1.94   | 2.46   | 2.63   | 2.43   | 1.45   | 2.29   | 0.93  | 1.94  | 1.42  | 1.54  | 1.14  | 1.10  | 0.84  | 0.79   | 1.60   | 2.07   | 1.58   | 0.78   | 0.55   | 1.98   |
| 1.99   | 1.05   | 2.02   | 0.56   | 1.40   | 1.39   | 1.58  | 1.89  | 0.95   | 2.52   | 1.67   | 0.81   | 0.60   | 0.52   | 0.51  | 0.45  | 0.21  | 1.08  | 0.36  | 0.99  | 1.23  | 1.64   | 0.21   | 2.32   | 2.26   | 0.06   | -3.87  | 0.82   |
| -1.46  | -1.32  | -1.52  | -1.33  | -1.39  | -0.05  | 0.91  | 0.91  | 0.41   | 1.55   | 1.10   | 1.83   | 1.18   | 1.02   | 1.34  | 0.78  | 0.57  | 0.26  | 1.02  | 1.41  | 0.98  | -1.60  | 0.12   | 0.34   | 0.28   | -0.83  | -2.96  | -0.72  |
| -0.83  | -1.01  | -1.35  | -0.46  | 0.03   | 0.66   | 0.59  | 0.49  | 0.52   | 0.28   | 0.88   | 0.49   | 1.10   | 1.25   | -0.26 | 0.72  | 0.40  | 0.04  | 0.72  | 0.21  | 0.21  | -0.08  | -0.43  | 0.23   | -0.47  | -0.21  | -2.51  | -0.88  |
| 0.31   | 3.78   | 3.28   | 2.12   | 1.82   | 2.88   | 1.81  | 1.78  | 2.09   | 1.65   | 2.18   | 2.43   | 1.25   | 2.09   | 0.34  | 1.16  | 0.76  | 0.17  | -0.42 | 2.08  | 1.31  | 1.41   | -0.04  | 1.00   | -0.31  | -0.46  | -0.97  | -0.48  |
| 0.58   | 1.07   | 1.42   | 1.03   | -0.04  | 1.33   | 2.15  | 1.25  | 1.01   | 2.39   | 2.83   | 2.17   | 1.40   | 2.28   | 1.06  | 2.39  | 1.19  | 1.57  | 4.02  | 2.80  | 2.67  | 6.86   | 6.98   | 6.98   | 7.21   | 4.81   | 3.12   | 6.84   |
| 2.01   | 2.09   | 3.26   | 3.80   | 0.77   | 2.47   | 1.19  | 1.76  | 0.76   | 0.89   | 1.13   | 1.36   | 0.92   | 1.06   | 0.23  | 0.50  | 0.48  | 0.11  | -0.51 | -0.34 | 0.48  | -1.67  | -1.36  | -1.56  | -1.91  | -1.74  | -2.81  | -0.48  |
| -0.47  | 1.08   | 0.78   | 0.37   | -0.81  | -0.29  | 1.30  | 0.89  | 0.44   | -0.81  | 0.90   | -0.94  | 0.43   | 0.35   | -0.38 | 1.97  | -1.15 | 0.53  | 0.92  | 0.25  | 0.34  | -0.28  | -2.18  | 0.20   | -0.65  | -2.24  | -4.11  | -2.30  |
| -4.05  | -4.31  | -7.00  | -3.14  | -3.78  | -6.33  | -0.05 | 2.39  | 1.02   | -1.19  | 0.64   | 1.58   | 1.13   | 1.07   | 0.49  | 0.94  | -1.17 | 1.99  | 0.16  | 0.32  | -0.01 | 1.65   | 0.45   | 1.33   | -0.74  | -1.02  | -1.38  | -2.67  |
| -3.55  | -4.15  | -9.95  | -4.71  | -2.80  | -8.05  | 0.86  | 1.85  | 0.96   | 1.70   | 0.77   | 2.03   | 0.56   | 0.58   | -0.08 | 0.39  | -0.51 | 2.13  | 0.55  | 0.59  | 1.99  | 1.09   | 1.19   | -1.96  | 0.20   | -1.10  | -2.52  | 0.10   |
| -9.79  | -12.09 | -8.83  | -9.26  | -8.76  | -10.97 | -0.86 | -1.94 | -4.70  | -5.14  | -5.17  | -4.25  | -1.13  | -3.10  | 1.13  | 0.09  | 1.19  | 1.26  | 1.73  | 0.28  | 1.76  | -0.59  | -0.49  | -1.47  | -1.12  | -1.85  | -2.77  | -4.27  |
| -0.31  | 0.06   | 0.74   | -0.53  | -0.86  | -3.49  | -0.45 | -0.67 | 0.27   | 0.49   | -0.11  | 3.09   | 1.41   | 3.31   | 2.06  | -1.12 | 0.28  | -0.40 | 0.09  | 1.17  | 1.30  | -2.04  | -2.01  | -0.23  | 0.03   | -0.92  | -2.70  | -1.17  |
| 0.70   | -0.23  | 0.75   | -0.43  | -0.39  | -0.57  | 0.42  | -2.31 | -1.76  | -0.31  | -1.20  | 1.26   | 1.05   | 3.02   | 1.83  | 3.09  | 2.46  | 2.98  | 2.09  | 2.78  | 2.47  | -1.57  | -1.09  | -0.06  | -0.34  | -0.43  | -1.63  | -1.05  |
| 0.28   | -2.25  | -4.08  | 1.96   | 2.24   | -5.24  | 1.81  | 2.36  | 2.33   | 0.05   | -0.33  | -0.22  | 1.02   | 0.93   | 0.51  | 1.09  | 0.38  | -0.05 | 1.12  | 0.48  | 2.50  | 1.59   | 1.77   | 1.82   | 3.03   | 0.22   | 1.09   | -0.49  |
| -10.62 | -10.64 | -11.34 | -12.14 | -12.41 | -12.07 | -8.43 | -9.28 | -11.13 | -10.95 | -11.08 | -11.01 | -11.44 | -11.97 | -4.98 | -7.86 | -6.19 | -6.47 | -6.06 | -5.28 | -4.32 | -11.48 | -8.67  | -10.64 | -9.12  | -8.99  | -9.75  | -8.75  |
| 0.37   | 0.50   | -0.11  | 0.73   | 0.71   | 0.11   | 1.26  | 1.95  | 1.21   | 1.12   | 1.02   | 0.85   | 0.55   | 1.54   | 0.46  | 1.30  | 0.44  | 0.94  | 0.26  | 1.14  | 0.01  | 0.01   | 0.37   | 0.14   | 0.68   | 0.40   | 0.58   | 0.11   |
| 1.78   | 1.01   | -0.28  | 0.96   | -0.48  | 2.25   | -0.05 | 2.27  | 1.83   | -0.34  | -0.42  | 2.58   | 0.64   | 1.26   | -1.43 | -1.35 | -1.74 | -1.85 | -1.72 | -1.29 | -0.59 | 0.69   | -1.12  | -0.40  | -0     |        |        |        |



|        |        |        |        |        |        |        |        |        |        |        |        |        |        |       |       |       |       |       |       |       |        |        |        |        |        |        |        |
|--------|--------|--------|--------|--------|--------|--------|--------|--------|--------|--------|--------|--------|--------|-------|-------|-------|-------|-------|-------|-------|--------|--------|--------|--------|--------|--------|--------|
| 8.94   | 10.92  | 14.30  | 10.04  | 4.46   | 9.09   | 7.99   | 12.81  | 15.84  | 10.11  | 17.51  | 7.00   | 7.71   | 10.88  | -0.97 | -1.31 | -2.61 | -0.60 | -0.42 | -0.25 | 0.72  | 1.18   | 1.21   | -0.30  | -5.02  | 0.90   | -3.87  | 0.31   |
| 19.66  | 23.54  | 20.18  | 18.38  | 8.92   | 10.53  | 10.63  | 17.36  | 28.94  | 21.12  | 29.97  | 19.64  | 9.35   | 17.41  | -0.94 | 0.80  | -2.97 | 1.81  | -1.73 | -1.34 | 2.38  | 3.80   | 2.78   | -0.34  | -5.14  | -3.14  | 0.31   | -2.91  |
| -3.68  | -4.08  | -7.72  | -11.72 | -12.86 | -15.19 | -7.00  | -4.91  | -10.23 | -11.42 | -5.36  | -3.22  | -4.24  | -3.82  | 1.61  | 2.48  | 0.56  | 2.47  | 0.49  | 0.81  | 0.46  | 0.51   | -1.64  | -2.48  | -7.13  | -5.02  | -3.22  | -3.27  |
| 10.36  | 7.60   | 4.70   | 9.37   | 7.89   | 8.04   | 9.12   | 8.38   | 12.66  | 19.20  | 18.92  | 11.44  | 9.49   | 18.17  | -5.23 | -4.36 | -4.44 | -2.86 | -3.73 | -4.85 | -5.46 | -40.55 | -22.63 | -32.65 | -50.83 | -43.19 | -30.91 | -49.24 |
| -2.88  | -1.39  | -3.91  | -6.21  | -6.84  | 2.10   | 2.20   | 1.49   | 2.46   | 2.69   | 2.25   | 0.47   | 0.19   | 3.29   | -3.09 | -1.70 | -1.81 | -0.11 | -0.08 | -1.21 | -0.92 | -13.48 | -7.00  | -11.22 | -14.41 | -13.36 | -11.13 | -13.84 |
| 0.21   | -0.62  | 0.47   | 0.46   | 0.48   | 0.01   | -0.87  | -1.39  | -0.73  | -0.51  | 0.97   | -1.37  | -0.59  | -0.13  | -0.77 | 0.48  | -0.37 | -0.45 | -1.51 | -0.47 | 0.05  | 0.55   | -2.36  | -0.88  | 0.45   | -0.74  | -1.97  | -0.89  |
| 1.95   | 1.21   | 2.05   | 1.39   | 0.76   | 1.98   | 3.26   | 5.15   | 3.91   | -0.02  | 2.77   | 2.80   | 2.10   | 5.55   | 1.36  | 1.58  | 0.78  | 1.47  | 1.78  | 3.45  | 2.27  | 2.85   | 1.67   | 2.77   | 2.36   | 1.50   | 0.51   | 4.40   |
| -0.88  | -0.34  | -2.06  | -0.85  | -1.84  | -0.56  | -0.13  | -0.26  | -0.30  | -0.54  | -0.83  | -0.39  | -0.58  | 0.71   | -1.67 | -1.02 | -2.30 | -1.10 | -0.46 | -1.88 | -1.50 | -2.03  | -1.83  | -2.81  | -2.04  | -1.92  | -3.19  | -2.36  |
| 2.00   | 1.68   | 2.28   | 1.78   | 2.87   | 2.61   | 3.04   | 3.41   | 3.40   | 1.53   | 2.31   | 2.32   | 4.15   | 4.46   | 2.53  | 3.19  | 0.94  | 2.34  | 2.13  | 3.40  | 1.96  | 1.42   | 3.65   | 3.05   | 2.00   | 2.44   | 3.59   | 2.71   |
| -2.65  | -1.73  | -3.23  | -0.11  | -0.94  | -1.03  | -0.49  | -3.97  | -3.53  | -2.66  | -1.61  | 2.11   | -1.21  | -0.63  | -2.13 | -2.35 | -2.47 | -2.18 | -1.76 | -1.27 | -1.70 | -5.54  | -3.50  | -5.04  | -6.26  | -5.54  | -9.38  | -4.82  |
| -0.43  | -0.70  | -1.50  | -0.27  | -0.48  | -1.24  | -1.98  | -2.99  | -2.30  | -2.74  | -0.52  | 1.96   | -1.09  | -0.04  | -2.38 | -2.44 | -2.41 | -2.12 | -2.09 | -1.66 | -2.20 | -3.39  | -3.94  | -3.84  | -2.70  | -3.84  | -5.80  | -3.18  |
| 0.14   | -0.16  | -0.43  | 0.79   | 1.54   | 0.21   | 1.54   | -1.21  | -0.79  | -0.06  | 0.12   | 1.47   | 1.51   | -0.57  | -1.06 | -1.29 | -0.25 | -0.31 | -0.07 | -0.15 | 0.76  | -4.16  | -1.80  | -0.08  | -1.34  | -1.54  | -7.23  | -2.97  |
| 2.14   | 3.28   | 3.36   | 3.03   | 0.85   | 1.52   | 3.58   | 4.34   | 3.88   | 3.49   | 4.05   | 2.66   | 3.12   | 6.41   | 0.89  | 0.54  | -0.42 | 0.74  | 1.80  | 2.11  | 1.12  | 2.24   | 0.08   | 2.60   | 0.52   | 1.46   | -1.95  | 2.43   |
| 1.27   | 2.55   | 3.39   | 2.74   | 2.01   | 3.19   | 2.03   | 1.26   | 1.26   | 0.79   | 3.16   | 2.27   | 1.96   | 1.59   | 3.88  | 2.52  | 2.70  | 1.74  | 2.68  | 3.22  | 2.93  | 6.27   | 4.50   | 5.61   | 7.01   | 5.30   | 2.63   | 7.08   |
| 1.06   | -1.72  | -1.77  | 2.92   | 2.19   | 2.02   | 2.08   | 0.77   | 1.43   | 1.43   | 2.05   | 1.62   | 2.91   | 1.94   | 0.58  | 0.03  | 0.38  | 0.14  | -0.39 | 0.97  | 1.51  | 0.43   | -0.47  | 0.39   | 0.71   | 0.18   | -1.44  | -1.01  |
| 3.04   | 0.23   | 1.45   | 3.91   | 3.11   | 2.07   | 6.33   | 10.38  | 8.21   | 5.25   | 7.39   | 9.94   | 7.60   | 6.59   | -2.82 | -1.94 | -3.51 | -1.90 | -3.61 | -2.93 | -2.42 | -4.23  | -6.04  | -4.74  | -6.52  | -3.95  | -10.29 | -4.91  |
| 3.99   | 0.42   | -2.06  | 8.12   | 5.13   | 3.78   | 9.80   | 15.65  | 13.23  | 8.55   | 11.46  | 15.17  | 11.39  | 13.34  | -4.37 | -5.23 | -5.65 | -2.12 | -3.96 | -4.07 | -2.73 | -8.39  | -8.13  | -7.48  | -10.94 | -7.14  | -11.41 | -9.13  |
| -4.85  | -7.55  | -9.28  | -3.50  | -7.06  | -6.32  | 0.99   | -4.68  | -3.03  | -2.64  | -3.98  | -4.15  | -3.03  | -4.12  | 1.51  | 2.30  | 1.98  | 1.14  | 2.12  | 4.70  | 3.97  | 5.04   | 3.09   | 3.64   | 5.29   | 2.71   | 0.52   | 3.40   |
| -4.72  | -7.36  | -11.61 | -3.66  | -1.50  | -5.50  | 2.21   | 2.32   | 2.22   | 0.77   | -0.50  | 2.59   | 0.63   | 1.25   | 1.26  | 0.26  | 0.11  | 0.65  | 0.73  | 0.59  | 0.28  | 0.65   | 0.23   | 1.95   | -0.20  | -0.86  | 2.35   | -2.71  |
| -4.17  | -8.59  | -14.92 | -2.80  | -1.65  | -7.83  | 2.52   | 3.59   | 3.92   | 2.34   | 0.54   | 3.53   | 1.71   | 1.85   | 0.96  | 0.44  | 0.16  | 2.35  | 1.03  | 0.68  | 0.92  | 1.65   | 0.19   | 0.58   | -1.49  | 1.77   | 0.26   | -1.90  |
| -8.25  | -14.57 | -12.60 | -9.38  | -8.53  | -9.62  | -1.91  | -4.90  | -4.31  | -7.23  | -7.30  | -0.86  | -2.44  | -3.38  | 0.01  | 0.01  | 0.96  | -0.10 | 0.49  | 0.74  | 0.79  | -1.19  | -1.42  | -0.43  | -1.86  | -1.81  | -4.88  | -4.32  |
| 0.30   | 0.19   | -0.28  | 0.25   | 0.79   | 2.68   | 0.38   | 2.36   | 2.14   | -0.56  | 0.91   | 1.32   | 0.58   | 2.11   | -0.47 | 0.08  | -1.48 | 0.06  | 0.30  | 0.38  | 0.80  | -1.86  | -1.17  | -1.01  | -1.55  | -1.10  | -3.43  | 0.97   |
| -0.58  | -0.30  | -0.24  | 0.07   | -1.32  | -0.32  | -0.12  | -0.23  | -0.29  | -0.86  | 0.22   | -0.54  | -0.38  | 0.46   | -0.47 | 0.00  | -0.72 | -0.12 | 0.30  | 0.36  | -0.94 | 0.48   | 0.28   | -1.27  | 0.41   | 0.53   | -1.97  | -0.39  |
| 1.30   | 1.43   | 0.65   | 0.17   | 0.74   | -0.55  | 2.18   | 2.07   | 2.73   | 0.03   | 0.22   | -0.38  | 2.12   | 2.12   | -0.47 | -0.16 | -0.90 | -0.56 | -0.78 | 0.36  | -0.19 | -2.14  | -3.61  | -0.50  | -4.55  | -3.67  | -5.22  | -2.51  |
| -0.28  | -0.27  | -0.08  | -1.19  | 0.32   | 0.70   | 1.19   | -8.62  | -10.74 | -15.72 | -14.51 | 3.70   | 2.80   | 2.54   | -0.05 | 0.10  | -1.17 | -0.94 | -0.13 | 0.08  | -1.04 | -0.47  | 0.57   | -0.11  | -0.22  | -0.70  | -1.90  | 1.19   |
| 1.24   | 1.10   | 0.22   | -1.00  | 1.06   | 1.05   | 0.58   | 0.69   | 1.23   | 1.45   | 1.80   | 1.54   | -0.19  | 2.97   | 0.89  | 0.33  | 0.92  | 1.77  | 1.82  | 0.68  | 1.31  | 1.15   | 0.64   | 0.84   | 1.72   | 1.51   | -0.61  | 1.63   |
| 0.37   | 2.78   | 2.70   | 0.84   | -0.54  | 1.59   | 2.63   | 12.37  | 13.83  | 13.22  | 12.42  | 6.32   | 1.30   | 0.99   | 0.83  | 0.25  | 0.10  | 0.39  | 0.67  | 2.94  | 0.55  | 2.32   | 1.58   | 2.58   | 1.97   | 1.26   | 1.53   | 4.93   |
| 1.75   | 1.47   | 1.06   | 1.91   | 1.48   | 2.00   | 2.14   | 2.24   | 1.95   | 1.15   | 3.36   | 3.42   | 2.08   | 3.73   | 1.68  | 1.88  | 2.13  | 1.93  | 1.80  | 2.18  | 2.33  | 2.17   | -0.13  | 3.13   | 2.27   | 1.42   | 0.73   | 1.36   |
| 1.69   | 1.01   | 1.34   | 1.82   | 0.70   | 1.67   | 1.94   | 1.94   | 2.51   | 3.14   | 2.98   | 2.97   | 2.22   | 3.38   | 0.84  | 1.68  | 1.30  | 1.37  | 1.34  | 1.66  | 1.15  | 1.72   | 1.70   | 1.50   | 2.31   | 1.27   | -0.04  | 1.81   |
| 1.93   | 1.84   | 2.64   | 1.45   | 2.31   | 1.32   | 2.48   | 2.88   | 2.38   | 2.03   | 3.08   | 1.32   | 2.21   | 1.30   | 1.91  | 0.95  | 0.32  | 1.37  | 1.31  | 1.09  | 1.46  | 1.12   | 0.25   | 3.39   | 2.12   | 0.20   | -1.94  | 0.63   |
| -1.03  | -1.77  | -1.55  | -0.84  | -1.26  | -0.75  | 0.76   | 1.07   | 1.03   | 1.42   | 1.79   | 2.22   | 1.44   | 1.63   | 0.11  | 0.03  | -0.09 | 0.06  | -0.01 | 0.68  | 0.90  | -1.79  | -0.90  | -0.46  | -0.77  | -1.03  | -4.27  | -1.48  |
| -1.43  | -0.82  | -0.08  | -0.65  | -0.85  | -0.18  | 0.77   | 1.37   | 0.43   | 0.02   | 1.28   | 1.45   | 1.41   | 1.55   | 0.03  | 1.27  | 0.31  | 0.12  | 0.69  | 0.12  | 0.25  | 0.39   | 0.70   | 0.31   | -1.02  | -0.44  | -3.34  | -0.90  |
| -0.39  | 5.15   | 5.29   | 2.39   | 1.30   | 2.53   | 1.33   | 2.86   | 1.54   | 1.21   | 3.39   | 2.44   | 1.61   | 2.08   | 0.16  | 0.46  | 1.15  | -0.03 | -0.74 | 1.39  | 0.84  | 1.31   | -0.12  | 2.73   | -1.35  | 0.84   | -0.25  | -0.96  |
| 1.15   | 0.42   | 0.32   | 0.13   | -0.57  | 0.45   | 0.75   | 1.36   | 0.97   | 1.27   | 2.43   | 3.13   | 1.46   | 1.42   | 1.62  | 2.73  | 1.25  | 2.20  | 4.56  | 3.37  | 2.70  | 8.47   | 7.21   | 7.42   | 7.65   | 5.95   | 3.45   | 8.51   |
| 1.87   | 1.63   | 1.98   | 4.22   | 0.82   | 2.97   | 1.61   | 2.44   | 1.76   | 1.12   | 1.72   | 2.05   | 1.72   | 1.88   | -0.34 | 0.28  | 0.21  | 0.05  | -1.10 | -0.30 | 0.37  | -1.98  | -1.55  | -0.62  | -2.55  | -1.80  | -3.28  | -1.60  |
| 0.04   | 0.89   | -0.28  | 0.28   | -0.34  | 0.72   | 1.14   | 1.51   | -0.16  | -1.20  | 1.37   | 1.13   | 0.65   | 1.81   | -0.32 | -0.15 | -1.18 | 0.63  | 0.68  | 0.73  | -0.57 | -0.84  | -0.92  | -0.20  | -2.48  | -3.28  | -3.39  | -1.98  |
| -4.41  | -6.22  | -6.82  | -4.77  | -3.70  | -6.33  | 0.88   | 2.23   | 2.66   | 0.78   | 1.09   | 3.72   | 0.72   | 1.61   | 1.61  | 0.51  | 0.50  | 1.77  | 1.42  | 0.57  | -0.23 | 1.34   | 0.09   | 1.23   | -0.24  | -0.61  | -1.99  | -3.33  |
| -3.83  | -5.91  | -10.37 | -4.86  | -2.61  | -10.37 | 0.85   | 3.03   | 2.04   | 2.21   | 1.79   | 3.83   | 1.70   | 2.31   | -0.29 | 0.64  | -0.36 | 2.06  | 0.58  | 0.95  | 1.50  | 1.34   | 0.89   | 1.24   | -2.45  | 0.65   | -0.48  | -3.09  |
| -11.94 | -16.48 | -11.40 | -14.23 | -12.08 | -13.19 | -2.40  | -5.34  | -8.29  | -6.25  | -5.43  | -7.10  | -2.25  | -4.30  | 1.39  | -0.57 | 1.88  | 0.61  | 1.52  | 0.71  | 0.72  | -1.34  | 0.15   | -1.97  | -1.79  | -1.38  | -2.48  | -5.08  |
| -0.95  | -1.77  | -0.19  | -1.32  | -3.01  | -2.76  | -1.27  | -1.02  | -0.61  | -0.74  | 0.79   | 2.99   | 1.79   | 2.21   | -2.41 | -1.48 | 1.23  | -0.63 | 0.58  | 0.68  | 0.68  | -2.37  | -2.89  | -2.11  | -1.70  | -1.82  | -3.32  | -1.91  |
| -1.54  | -1.66  | -1.67  | -4.96  | -3.04  | -3.24  | -1.22  | -5.01  | -2.98  | -1.94  | -2.67  | 0.21   | -1.39  | 1.64   | 1.49  | 3.10  | 1.27  | 2.46  | 1.82  | 2.20  | 2.46  | -1.80  | -2.19  | -1.10  | -1.39  | -0.87  | -3.66  | -2.85  |
| 1.17   | -2.72  | -5.95  | -1.33  | 2.11   | -4.70  | 1.83   | 0.71   | 1.75   | 1.73   | 0.12   | 0.79   | 1.32   | 2.42   | 1.41  | 0.64  | 1.03  | 0.54  | 0.37  | 1.25  | 1.91  | 1.98   | 1.08   | 3.26   | 0.14   | 0.83   | 0.60   | -1.19  |
| -12.40 | -11.43 | -12.33 | -13.95 | -13.80 | -15.08 | -10.72 | -10.54 | -12.99 | -12.23 | -13.11 | -13.08 | -12.12 | -14.78 | -6.72 | -9.12 | -6.67 | -7.66 | -7.14 | -7.48 | -6.20 | -12.53 | -10.32 | -12.14 | -11.93 | -10.01 | -12.19 | -9.04  |
| 0.86   | 0.59   | 0.02   | 1.22   | 0.81   | 1.21   | 2.23   | 1.74   | 1.77   | 1.50   | 1.42   | 2.13   | 0.78   | 2.55   | 0.64  | 1.34  | -0.25 | 1.14  | 0.53  | 0.98  | 0.17  | 1.81   | 0.86   | 0.18   | 0.58   | 0.87   | 0.31   | 0.57   |
| 2.20   | 1.05   | 1.03   | 0.90   | 0.69   | 2.18   | -0.21  | 3.39   | 2.35   | -0.79  | 0.57   | 1.50   | 1.54   | 2.26   | -1.87 | -1.40 | -1.80 | -1.77 | -1.58 | -0.88 | 0.32  | 1.60   | -0.60  | 0.34   | -0.17  | -0.84  | -0.07  | -0.72  |
| -1.11  | -0.47  | -1.13  | 0.60   | -0.66  | 0.35   | -0.61  | 0.61   | 1.17   | -0.48  | 1.57   | 1.07   | 0.15   | 2.20   | -1.35 | 0.07  | 0.32  | 1.01  | -0.30 | 0.57  | -0.30 | -0.67  | -0.81  | 1.59   | -0.92  | -0.19  | -1.53  | -0.06  |
| -0.94  | -0.96  | -1.33  | 0.25   | -0.29  | -0.84  | 0.24   | -1.25  | -0.45  | -0.51  | 0.70   | 0.10   | 0.02   | -0.38  | -0.45 | 0.51  | -0.93 | -0.64 | 0.43  | 0.79  | 0.43  | -0.89  | -1.96  | -0.63  | -0.59  | -1.48  | -2.37  | -0.66  |
| 0.48   | -0.09  | -0.30  | 0.44   | -0.27  | 1.71   | 1.02   | 3.92   | 1.92   | 2.38   | 1.81   | 1.94   | 0.50   | 0.97   | -1.80 | -0.63 | -0.81 | 0.13  | 0.39  |       |       |        |        |        |        |        |        |        |

|        |        |        |        |        |        |        |        |        |        |        |        |        |        |        |        |       |       |       |       |       |        |        |        |        |        |        |        |
|--------|--------|--------|--------|--------|--------|--------|--------|--------|--------|--------|--------|--------|--------|--------|--------|-------|-------|-------|-------|-------|--------|--------|--------|--------|--------|--------|--------|
| 18.43  | 18.97  | 20.02  | 17.39  | 13.96  | 15.06  | 12.99  | 10.78  | 16.88  | 25.88  | 25.32  | 14.70  | 12.08  | 21.41  | -10.08 | -7.40  | -6.67 | -2.74 | -6.35 | -8.01 | -9.45 | -58.79 | -32.61 | -47.43 | -69.67 | -56.90 | -45.00 | -63.96 |
| -2.59  | 1.41   | -0.07  | -6.10  | -6.36  | 3.73   | 1.96   | 1.74   | 3.51   | 3.82   | 3.43   | 2.37   | 5.04   | 4.07   | -3.46  | -2.26  | -2.19 | -0.93 | -0.77 | -2.22 | -1.77 | -20.22 | -9.85  | -16.30 | -21.92 | -19.30 | -16.77 | -20.05 |
| 0.75   | -0.81  | 0.16   | 0.21   | 0.03   | 0.92   | -0.86  | -2.14  | -1.50  | -0.07  | 1.57   | -1.28  | -0.38  | 0.18   | -2.05  | -0.06  | 0.32  | -1.08 | -1.22 | 0.71  | -0.14 | 0.34   | -1.98  | -0.27  | 0.39   | -0.65  | -4.16  | -0.66  |
| 3.79   | 1.73   | 1.27   | 0.75   | 0.81   | 2.49   | 2.12   | 4.19   | 4.53   | -0.10  | 1.12   | 2.73   | 2.74   | 5.72   | 1.62   | 1.65   | 1.45  | 2.06  | 1.97  | 3.53  | 2.20  | 2.35   | 1.94   | 4.43   | 3.37   | 1.82   | 4.09   | 4.25   |
| -1.83  | -0.47  | -2.08  | -0.85  | -1.51  | -0.28  | 0.48   | 0.43   | 0.00   | -0.59  | -0.34  | -0.43  | -0.70  | 0.81   | -2.04  | -1.26  | -2.24 | -1.12 | -0.78 | -1.99 | -2.00 | -2.17  | -1.35  | -2.63  | -2.81  | -2.00  | -3.77  | -2.68  |
| 3.29   | 0.99   | 1.44   | 1.54   | 2.62   | 2.27   | 3.24   | 3.79   | 2.74   | 1.59   | 1.40   | 2.66   | 3.58   | 4.36   | 4.22   | 2.98   | 2.15  | 2.26  | 1.44  | 4.14  | 2.34  | 1.45   | 3.10   | 2.99   | 2.20   | 2.08   | 2.10   | 2.38   |
| -1.50  | -1.27  | -1.85  | 1.03   | -0.32  | -1.30  | 0.19   | -3.48  | -2.83  | -3.53  | -0.70  | 9.49   | -1.60  | 0.40   | -2.50  | -2.94  | -4.23 | -2.83 | -2.48 | -1.92 | -2.14 | -6.34  | -4.19  | -5.40  | -7.52  | -5.95  | -10.27 | -6.54  |
| -0.43  | -0.83  | -0.90  | 1.06   | -0.30  | -0.92  | -1.41  | -2.77  | -2.48  | -1.57  | -0.74  | 7.28   | -1.01  | 0.17   | -3.03  | -2.46  | -2.36 | -2.30 | -2.47 | -2.29 | -2.55 | -5.52  | -4.08  | -4.98  | -4.34  | -4.69  | -8.39  | -4.29  |
| 1.42   | 0.45   | -0.57  | 1.79   | 0.73   | 1.20   | -1.23  | -0.48  | 0.40   | 1.03   | 3.99   | 2.31   | -0.74  | -1.41  | -1.88  | -0.44  | -1.33 | -0.44 | -0.87 | 0.35  | -1.79 | -3.00  | -7.82  | -2.27  | -1.50  | -8.21  | -2.81  |        |
| 2.05   | 2.54   | 2.72   | 4.91   | 0.21   | 1.48   | 3.85   | 4.45   | 4.31   | 4.31   | 5.11   | 4.30   | 4.54   | 4.81   | 1.60   | -0.24  | -1.18 | 1.77  | 1.20  | 2.05  | 0.68  | 3.49   | -0.17  | 3.62   | 1.48   | 1.60   | -2.29  | 2.38   |
| 0.62   | 1.76   | 3.04   | 2.92   | 1.42   | 2.38   | 1.41   | 1.15   | 0.72   | 0.03   | 1.92   | 2.34   | 1.58   | 2.44   | 4.18   | 3.97   | 3.81  | 2.17  | 4.08  | 3.91  | 3.97  | 7.42   | 6.37   | 6.12   | 8.53   | 6.48   | 4.53   | 8.30   |
| 2.79   | -0.99  | -2.03  | 2.99   | 3.50   | 2.42   | 3.05   | 1.15   | -0.16  | 2.21   | 2.87   | 1.80   | 2.76   | 3.08   | 1.50   | 0.98   | 0.95  | 0.73  | 0.46  | 1.39  | 1.43  | 0.10   | -1.65  | -0.72  | -0.56  | 0.69   | -2.34  | 0.60   |
| 4.66   | 3.01   | 4.16   | 8.21   | 6.20   | 4.29   | 9.72   | 14.52  | 10.30  | 7.72   | 11.13  | 17.35  | 9.67   | 10.49  | -3.47  | -3.87  | -4.43 | -2.66 | -3.32 | -4.05 | -2.17 | -5.33  | -6.25  | -4.99  | -8.62  | -5.21  | -11.39 | -6.70  |
| 8.79   | 5.24   | 1.87   | 14.01  | 9.52   | 6.16   | 14.05  | 21.96  | 19.17  | 14.84  | 17.43  | 24.76  | 17.17  | 17.55  | -6.83  | -7.51  | -8.15 | -4.16 | -1.70 | -5.86 | -4.86 | -10.04 | -9.49  | -8.45  | -13.16 | -8.22  | -12.53 | -11.27 |
| -7.99  | -9.43  | -10.57 | -7.66  | -8.10  | -7.26  | -3.25  | -6.88  | -5.46  | -4.87  | -5.54  | -6.69  | -5.14  | -5.61  | 1.82   | 2.96   | 3.93  | 2.29  | 2.45  | 4.62  | 3.82  | 4.18   | 3.55   | 4.45   | 4.94   | 1.17   | 1.33   | 4.00   |
| -4.67  | -6.25  | -12.00 | -5.15  | -2.02  | -6.28  | 0.92   | 3.28   | 2.61   | 1.00   | 0.36   | 3.37   | 1.10   | 3.14   | 0.61   | 0.33   | -0.33 | 0.48  | 0.68  | 0.44  | 0.30  | 0.44   | 0.45   | 2.29   | -0.47  | -1.17  | -2.17  | -2.79  |
| -3.50  | -8.19  | -14.86 | -3.51  | -1.91  | -7.30  | 3.35   | 4.99   | 5.48   | 3.15   | 1.49   | 4.01   | 2.62   | 3.56   | 0.99   | 0.33   | 0.42  | 1.95  | 1.24  | 1.02  | 0.98  | 1.25   | 0.76   | 0.95   | -2.48  | 1.20   | -0.66  | -3.03  |
| -12.63 | -17.97 | -15.65 | -15.20 | -11.88 | -12.62 | -4.52  | -8.76  | -7.27  | -10.26 | -7.99  | -4.95  | -4.32  | -5.39  | -0.58  | 0.12   | 0.91  | 0.62  | 0.06  | 0.76  | 0.43  | -2.25  | -0.67  | -1.45  | -2.26  | -1.82  | -6.98  | -3.92  |
| 0.68   | 0.60   | -0.09  | -0.10  | 0.14   | 1.57   | 0.62   | 1.89   | 1.81   | -0.63  | -0.54  | 1.55   | 1.06   | 2.77   | -0.55  | -0.19  | -1.01 | -0.23 | 0.50  | 0.44  | 1.03  | -2.23  | -0.64  | -1.38  | -1.35  | -0.80  | -3.20  | 0.01   |
| -0.60  | -0.62  | -0.06  | -0.16  | -0.19  | -0.09  | -0.15  | -0.07  | 0.24   | -0.59  | 0.08   | -0.27  | -0.22  | 0.91   | -0.40  | -0.34  | -0.71 | 0.22  | -0.18 | 0.33  | -0.75 | 0.72   | 0.75   | -0.44  | 0.68   | 0.96   | -1.39  | -0.22  |
| 1.26   | 1.24   | 1.03   | 1.67   | 0.56   | 1.31   | 2.05   | 2.79   | 1.37   | -0.06  | -0.01  | 0.08   | 1.22   | 3.34   | -1.15  | -0.52  | -1.43 | -0.65 | -0.94 | -0.35 | -0.08 | -3.22  | -3.63  | -3.27  | -5.10  | -3.62  | -6.65  | -2.94  |
| -0.10  | -0.54  | -0.44  | -1.85  | 0.30   | 1.28   | 1.73   | -7.78  | -11.67 | -16.18 | -16.01 | 4.27   | 2.62   | 2.66   | -0.57  | -0.33  | -1.99 | -0.98 | 0.53  | 0.62  | -1.13 | -1.08  | 0.46   | -0.82  | 0.17   | 0.70   | -1.60  | 0.69   |
| 0.53   | 1.26   | 0.81   | -0.92  | 0.57   | 1.16   | 0.39   | 1.35   | 0.90   | 1.24   | 2.51   | 2.51   | -0.52  | 3.01   | 1.02   | 0.14   | 0.70  | 1.51  | 0.90  | 1.04  | 1.07  | 1.71   | 0.46   | 0.84   | 1.36   | 1.31   | -0.43  | 1.38   |
| -0.15  | 1.88   | 0.65   | 0.77   | 0.69   | 1.32   | 1.59   | 13.02  | 16.38  | 15.46  | 13.66  | 6.56   | 0.98   | 4.07   | 1.62   | -0.30  | 0.15  | 1.38  | 0.39  | 1.19  | 0.20  | 1.51   | 1.36   | 2.36   | 1.77   | 1.90   | 0.75   | 4.81   |
| 1.18   | 2.18   | 2.19   | 2.29   | 1.26   | 2.30   | 2.23   | 2.83   | 2.31   | 1.98   | 2.99   | 2.02   | 2.07   | 3.02   | 1.64   | 1.96   | 2.25  | 2.34  | 1.89  | 2.02  | 1.53  | 2.43   | 0.24   | 2.52   | 1.83   | 1.61   | 0.64   | 1.66   |
| 1.93   | 0.39   | 0.81   | 2.07   | 1.92   | 1.79   | 1.82   | 1.60   | 2.30   | 2.61   | 3.45   | 2.51   | 1.76   | 3.01   | 1.23   | 2.11   | 1.20  | 1.68  | 1.38  | 1.88  | 2.08  | 1.98   | 1.50   | 1.58   | 2.70   | 0.86   | -0.06  | 2.78   |
| 1.40   | 1.71   | 3.61   | 0.59   | 1.83   | 0.26   | 1.62   | 3.15   | 1.21   | 3.12   | 2.80   | 0.60   | 2.63   | -0.30  | 0.80   | 0.17   | 0.60  | 0.82  | 1.41  | 2.44  | 0.63  | 1.06   | 0.79   | 2.06   | -0.02  | 0.73   | -1.64  | -0.65  |
| -1.89  | -2.25  | -3.54  | -1.23  | -2.00  | -1.04  | 1.43   | 1.51   | 1.57   | 1.39   | 1.33   | 4.32   | 0.66   | 2.50   | 0.39   | 0.30   | 0.62  | 0.42  | -0.24 | 1.11  | 0.08  | -2.09  | -1.08  | -0.44  | -1.23  | -0.71  | -3.81  | -1.87  |
| -1.52  | -1.74  | -1.26  | -0.62  | -1.21  | -0.14  | 0.22   | 0.01   | -0.21  | -0.33  | 1.79   | 1.55   | 0.48   | 1.48   | 0.31   | 0.87   | 0.36  | 0.57  | 0.43  | 0.97  | 0.51  | -0.38  | 0.30   | 0.62   | -0.68  | -0.14  | -3.75  | -0.49  |
| 0.03   | 4.93   | 3.12   | 2.24   | 2.71   | 4.97   | 1.10   | 2.83   | 1.86   | 1.67   | 2.55   | 2.73   | 2.43   | 2.51   | 0.50   | 1.14   | 0.57  | 0.01  | 0.70  | -0.22 | 0.36  | 0.38   | -0.42  | 1.57   | -0.96  | 1.59   | -0.69  | -0.28  |
| -0.36  | -0.77  | -1.08  | 0.53   | -1.90  | -0.69  | 0.03   | 0.50   | 0.10   | 0.80   | 1.18   | 3.60   | 1.15   | 1.42   | 2.51   | 3.00   | 2.16  | 2.66  | 4.60  | 4.03  | 3.16  | 8.30   | 8.69   | 8.99   | 9.82   | 6.54   | 6.29   | 9.52   |
| 2.72   | 2.18   | 2.51   | 4.41   | 1.28   | 3.28   | 2.61   | 3.48   | 1.89   | 1.51   | 2.33   | 1.57   | 1.06   | 1.66   | -0.04  | -0.14  | 0.14  | 0.43  | -0.53 | -0.13 | 0.39  | -1.82  | -1.24  | -1.43  | -2.68  | -2.43  | -3.2   | -1.62  |
| -0.81  | 2.49   | -0.56  | 1.33   | 0.24   | 0.26   | 0.90   | 2.03   | 0.77   | -1.74  | 1.19   | 0.84   | 2.07   | -0.06  | -0.53  | 0.98   | -0.73 | 0.81  | 1.07  | 0.03  | -1.59 | -1.29  | -1.75  | -1.08  | -2.65  | -1.40  | -2.66  | -1.48  |
| -4.14  | -5.95  | -5.57  | -2.31  | -3.49  | -7.48  | 1.83   | 4.90   | 3.53   | 2.11   | 1.62   | 6.40   | 0.88   | 2.49   | -0.07  | 1.00   | -0.23 | 1.86  | 0.86  | 1.37  | -0.62 | 0.88   | 0.74   | 1.21   | -1.24  | -0.44  | -1.61  | -4.14  |
| -3.15  | -7.10  | -11.70 | -3.95  | -2.42  | -10.63 | 1.72   | 4.15   | 3.11   | 2.41   | 1.93   | 4.68   | 2.47   | 2.70   | -0.32  | 0.41   | 0.08  | 2.12  | 0.86  | 1.13  | 1.54  | 1.59   | 1.43   | 2.36   | -3.31  | 0.42   | -0.53  | -3.37  |
| -16.01 | -21.88 | -15.08 | -20.19 | -16.79 | -18.88 | -6.81  | -9.59  | -10.92 | -9.33  | -11.81 | -11.28 | -4.99  | -6.01  | 0.58   | 0.02   | 2.14  | 1.19  | 0.57  | 1.19  | 1.52  | -2.21  | -0.02  | -2.50  | -3.16  | -2.37  | -2.63  | -7.11  |
| -2.18  | -3.37  | -0.93  | -4.13  | -5.26  | -5.00  | -1.82  | -4.74  | -3.02  | -1.62  | -1.55  | 1.31   | -1.04  | -0.19  | -2.85  | -0.26  | 0.59  | -0.42 | -0.05 | -0.04 | -0.30 | -3.28  | -2.68  | -2.83  | -2.94  | -2.59  | -3.81  | -2.18  |
| -4.11  | -5.32  | -5.69  | -8.36  | -5.94  | -5.38  | -4.41  | -8.84  | -5.04  | -3.87  | -5.79  | -1.46  | -3.72  | -0.17  | 0.49   | 2.07   | 1.81  | 1.49  | 1.17  | 2.35  | 2.26  | -2.90  | -2.25  | -2.07  | -2.21  | -1.24  | -3.90  | -4.11  |
| 0.43   | -2.48  | -5.68  | -2.22  | 2.43   | -5.38  | 2.52   | 2.63   | 2.51   | 1.98   | 0.28   | 1.44   | 1.20   | 2.26   | 1.98   | 0.76   | -0.18 | 0.49  | -0.17 | 2.44  | 1.50  | 1.68   | -0.01  | 2.08   | -1.19  | 0.98   | 3.00   | -0.16  |
| -13.68 | -14.52 | -14.78 | -15.64 | -15.55 | -15.49 | -11.13 | -12.07 | -16.00 | -13.38 | -15.96 | -15.63 | -14.57 | -16.97 | -7.34  | -10.68 | -8.47 | -9.69 | -9.10 | -8.41 | -7.59 | -16.23 | -12.01 | -14.33 | -14.14 | -11.39 | -14.75 | -10.43 |
| 1.05   | 1.35   | 0.36   | 0.88   | 1.56   | 1.01   | 1.75   | 2.09   | 2.32   | 1.63   | 1.83   | 2.45   | 1.99   | 2.78   | 0.10   | 0.24   | 0.72  | 1.15  | 0.30  | 1.36  | 0.23  | 0.72   | 1.03   | 2.00   | 0.70   | -0.07  | 0.60   | 0.21   |
| 3.79   | 1.19   | 1.37   | 2.32   | 0.99   | 1.96   | 1.08   | 3.94   | 2.23   | 0.77   | 0.52   | 1.28   | 0.80   | 1.79   | -1.04  | 0.24   | -2.30 | -0.25 | -1.55 | -0.93 | 0.02  | -0.42  | 0.30   | 0.29   | 0.01   | -0.97  | -0.90  | 0.41   |
| -1.25  | -1.34  | 0.34   | 0.06   | -0.75  | 0.68   | 0.39   | 1.19   | 0.05   | 1.43   | 1.80   | 1.53   | 0.34   | 1.14   | -0.48  | -0.24  | 0.82  | 0.75  | 0.05  | 1.42  | -0.08 | -1.05  | -0.30  | 0.60   | -1.20  | -0.98  | -4.22  | -1.70  |
| -0.25  | -1.20  | -1.29  | 1.06   | 0.18   | -0.49  | 0.54   | -1.75  | 0.11   | -0.99  | 0.60   | 1.38   | -1.04  | -0.06  | -1.13  | -0.08  | -1.28 | -0.58 | 0.00  | 0.11  | 0.51  | -1.98  | -1.77  | -0.28  | -1.13  | -0.91  | -2.68  | -1.25  |
| 0.98   | 0.12   | 0.63   | 0.64   | 0.92   | 1.49   | 0.92   | 4.12   | 2.54   | 2.69   | 3.79   | 2.43   | 1.66   | 2.44   | 0.37   | -0.71  | 0.41  | -0.69 | 0.21  | 0.03  | -0.29 | -1.33  | -1.01  | -0.88  | 0.49   | -1.19  | -1.05  | -0.45  |
| 1.23   | -3.58  | 13.29  | -6.23  | -4.14  | -0.31  | -10.01 | 3.96   | -1.61  | -4.90  | 2.67   | -1.17  | -2.90  | 0.64   | -0.88  | -2.78  | -1.99 | -1.76 | 1.15  | -0.10 | 1.46  | -0.59  | -0.81  | -0.70  | 4.86   | -3.16  | -2.89  | -4.10  |
| 4.40   | -0.84  | 11.60  | -0.90  | -3.75  | 4.12   | -13.81 | 4.34   | -0.22  | -3.62  | 3.99   | -3.44  | -3.99  | -0.60  | -1.03  | 2.81   | -2.07 | 1.77  | 0.87  | -0.35 | 2.92  | -1.61  | -1.92  | 0.99   | 3.87   | -2.05  | -2.13  | -6.22  |
| 7.70   | 4.80   | 12.33  | 6.26   | -1.42  | 11.61  | -22.49 | 2.14   | -0.99  | -4.12  | 2.94   | -5.14  | -6.56  | -4.32  | 0.35   | 2.09   | -0.29 | 2.50  | 1.03  |       |       |        |        |        |        |        |        |        |

|        |        |        |        |        |        |        |        |        |        |        |        |        |        |       |        |       |        |        |       |       |        |        |        |        |        |        |        |
|--------|--------|--------|--------|--------|--------|--------|--------|--------|--------|--------|--------|--------|--------|-------|--------|-------|--------|--------|-------|-------|--------|--------|--------|--------|--------|--------|--------|
| 2.11   | 1.36   | 0.23   | 1.59   | -0.34  | 1.66   | 3.14   | 4.86   | 4.49   | 0.05   | 2.12   | 2.59   | 1.72   | 5.73   | 3.10  | 1.96   | 1.46  | 2.94   | 2.35   | 3.35  | 2.23  | 3.14   | 2.83   | 3.81   | 3.36   | 1.54   | 0.63   | 4.15   |
| -0.73  | -0.19  | -2.19  | -1.16  | -1.27  | 0.44   | 0.03   | 0.39   | 0.47   | -0.58  | -0.68  | -0.16  | -0.62  | 0.24   | -2.10 | -1.45  | -2.18 | -0.66  | -0.97  | -1.77 | -1.79 | -2.27  | -1.28  | -2.53  | -2.51  | -1.84  | -3.99  | -2.66  |
| 2.60   | 0.77   | 1.79   | 0.33   | 1.33   | 1.76   | 2.39   | 4.37   | 3.66   | 1.47   | 1.95   | 2.72   | 3.17   | 4.73   | 4.16  | 3.36   | 2.52  | 3.20   | 1.93   | 3.81  | 1.98  | 1.83   | 3.41   | 4.53   | 2.96   | 1.74   | 1.26   | 2.20   |
| -0.61  | 0.39   | -1.52  | 1.99   | 1.40   | -0.39  | 1.11   | -2.22  | -2.23  | -1.44  | -0.37  | 7.68   | -1.06  | 1.29   | -2.50 | -3.79  | -2.62 | -2.56  | -2.37  | -1.86 | -2.92 | -7.09  | -5.46  | -7.47  | -9.70  | -7.43  | -12.00 | -7.09  |
| 1.31   | 0.35   | 0.03   | 1.99   | 0.76   | 0.53   | -0.99  | -0.29  | -0.83  | -1.74  | -0.09  | 7.24   | -0.54  | 1.06   | -3.26 | -2.34  | -2.64 | -1.81  | -2.48  | -2.12 | -2.44 | -6.39  | -4.64  | -5.45  | -4.52  | -5.16  | -8.86  | -5.34  |
| 0.83   | -0.71  | -1.72  | 2.12   | 1.52   | 1.60   | 1.83   | -0.37  | -0.20  | 0.89   | 1.69   | 2.37   | 2.59   | 1.15   | -2.22 | -1.84  | -0.40 | -1.21  | -0.33  | -1.41 | 0.19  | -2.94  | -3.02  | -1.61  | -4.07  | -3.17  | -8.05  | -4.07  |
| 1.91   | 3.96   | 1.94   | 4.52   | 0.36   | 1.92   | 5.31   | 5.13   | 5.23   | 3.85   | 5.94   | 5.17   | 3.74   | 6.71   | 2.15  | 0.26   | 0.86  | 1.61   | 1.99   | 2.40  | 1.26  | 4.73   | 0.41   | 3.50   | 2.65   | 1.84   | -1.30  | 3.34   |
| 0.43   | 1.24   | 1.94   | 2.25   | 1.16   | 1.96   | 1.10   | 0.56   | 0.94   | 0.74   | 2.03   | 1.67   | 2.02   | 1.52   | 5.46  | 4.39   | 3.89  | 2.53   | 4.67   | 4.65  | 4.93  | 8.67   | 6.18   | 8.67   | 10.57  | 8.05   | 5.37   | 10.15  |
| 2.85   | 0.25   | 1.95   | 3.41   | 3.39   | 2.64   | 2.19   | 0.86   | 1.69   | 2.63   | 2.77   | 2.45   | 2.23   | 2.71   | 0.29  | 1.69   | -0.75 | 0.11   | 0.71   | 1.46  | 2.19  | -0.43  | -0.96  | -0.28  | -1.74  | 0.74   | -1.54  | -0.29  |
| 9.17   | 6.15   | 6.09   | 11.34  | 8.62   | 7.16   | 12.29  | 19.54  | 15.70  | 11.55  | 15.80  | 22.48  | 14.00  | 13.92  | -4.33 | -5.42  | -4.64 | -4.02  | -8.41  | -4.49 | -3.65 | -6.95  | -7.21  | -5.13  | -9.61  | -6.37  | -13.22 | -6.61  |
| 14.13  | 11.67  | 8.23   | 20.71  | 16.20  | 11.40  | 12.10  | 30.33  | 25.93  | 20.69  | 26.46  | 35.45  | 24.16  | 25.41  | -8.47 | -9.41  | -9.81 | -5.37  | -8.44  | -7.77 | -5.85 | -11.11 | -10.17 | -10.19 | -15.36 | -10.32 | -14.70 | -13.74 |
| -10.01 | -12.39 | -13.56 | -9.60  | -11.58 | -10.45 | -5.08  | -10.28 | -7.90  | -8.18  | -9.86  | -8.60  | -5.60  | -9.76  | 2.63  | 4.30   | 5.08  | 4.28   | 3.63   | 5.34  | 3.68  | 5.88   | 4.05   | 3.98   | 5.04   | 1.22   | 0.93   | 3.52   |
| -4.84  | -6.59  | -14.07 | -4.73  | -0.40  | -6.02  | 2.51   | 3.43   | 3.86   | 0.72   | 0.38   | 4.13   | 2.02   | 3.47   | 0.99  | 0.89   | -0.08 | 1.79   | 0.75   | 0.83  | 0.48  | -0.20  | 6.10   | 2.10   | -1.80  | -1.16  | -2.63  | -3.16  |
| -4.22  | -7.65  | -16.47 | -1.67  | 0.83   | -6.64  | 4.59   | 6.71   | 7.06   | 5.18   | 2.77   | 7.46   | 3.96   | 5.01   | 1.48  | -0.03  | 1.24  | 2.37   | 1.48   | 0.85  | 1.53  | 1.50   | 0.96   | 1.38   | -4.11  | -0.21  | -2.01  | -3.52  |
| -17.31 | -22.15 | -21.80 | -22.51 | -17.25 | -16.63 | -7.69  | -13.77 | -13.00 | -14.04 | -13.67 | -10.16 | -6.88  | -8.79  | -0.78 | 0.95   | 0.28  | -0.66  | -0.92  | -0.17 | -1.79 | -1.92  | -0.34  | -1.83  | -2.20  | -2.88  | -5.37  | -4.99  |
| 0.89   | 1.33   | 0.12   | 0.41   | -0.56  | 2.26   | 1.39   | 2.47   | 2.72   | 0.03   | 0.08   | 2.09   | 1.43   | 1.68   | 0.08  | -0.72  | -2.15 | 0.10   | 0.99   | 0.39  | 0.28  | -1.79  | -0.46  | -1.56  | -2.01  | -0.75  | -4.60  | 0.63   |
| -0.93  | -0.45  | -0.82  | 0.21   | -0.15  | -0.46  | -0.53  | 0.60   | 1.29   | -0.88  | 0.34   | 0.05   | -0.69  | 1.08   | 0.16  | -0.07  | 0.17  | 0.36   | 0.35   | 0.40  | 0.13  | 0.99   | 1.57   | 1.05   | 1.67   | 1.34   | -1.14  | 0.41   |
| 2.81   | 1.24   | 2.39   | 1.03   | 0.67   | 1.28   | 2.11   | 2.75   | 2.60   | 1.49   | -0.48  | 1.40   | 1.68   | 3.21   | -1.65 | -0.77  | -1.72 | -0.75  | -0.75  | -0.69 | -0.76 | -4.77  | -4.28  | -4.15  | -6.90  | -4.48  | -6.77  | -3.68  |
| -0.81  | -1.05  | -1.05  | -2.89  | 0.56   | 2.11   | 0.85   | -8.89  | -11.13 | -17.00 | -16.63 | 4.50   | 2.81   | 3.72   | -0.06 | -0.97  | -1.15 | -1.05  | -0.25  | -0.16 | -1.30 | -0.75  | 0.06   | -0.14  | -0.62  | -1.20  | -1.11  | 1.02   |
| 0.94   | 0.78   | 0.37   | -0.46  | 0.48   | 1.15   | 0.42   | 1.76   | 1.35   | 1.72   | 1.63   | 2.36   | -0.27  | 2.35   | 1.28  | 0.12   | 0.76  | 2.18   | 1.97   | 0.53  | 1.43  | 1.12   | 0.74   | 0.95   | 1.05   | 1.85   | -1.01  | 1.90   |
| 0.46   | 1.19   | 0.66   | 1.37   | -1.50  | 1.55   | 1.88   | 14.20  | 16.24  | 17.10  | 15.84  | 7.38   | 0.92   | 1.69   | 1.10  | -0.93  | 0.85  | 0.38   | -0.57  | 0.87  | -1.11 | -0.05  | 0.29   | 1.68   | 2.41   | 1.46   | 0.28   | 1.97   |
| 1.95   | 0.88   | 1.59   | 1.20   | 1.77   | 1.90   | 2.90   | 2.84   | 2.67   | 1.57   | 2.38   | 1.89   | 2.23   | 1.19   | 2.14  | 1.54   | 1.64  | 2.10   | 2.03   | 2.47  | 3.28  | 2.55   | 1.37   | 2.88   | 1.81   | 1.82   | 0.89   | 2.61   |
| 1.26   | 1.23   | 0.97   | 2.21   | 1.06   | 1.27   | 1.16   | 2.03   | 2.45   | 3.70   | 3.30   | 2.66   | 1.96   | 3.16   | 1.68  | 2.27   | 2.12  | 1.51   | 1.90   | 1.68  | 1.16  | 1.69   | 1.85   | 1.80   | 2.46   | 1.66   | 0.63   | 2.17   |
| 2.55   | 0.30   | 2.18   | 0.90   | 0.77   | 0.29   | 1.67   | 3.77   | 1.42   | 0.93   | 3.37   | 0.77   | 2.89   | 1.88   | 2.03  | 0.91   | 1.04  | 1.40   | 1.02   | 1.26  | 2.45  | 1.08   | -0.26  | 3.41   | 1.45   | 0.42   | -3.32  | 1.48   |
| -2.31  | -2.12  | -3.74  | -1.52  | -3.40  | -1.47  | 0.47   | 0.57   | 1.01   | 1.49   | 2.37   | 4.79   | 1.39   | 2.15   | 0.78  | 1.03   | 1.17  | -0.43  | 0.12   | 1.47  | 0.57  | -2.91  | -0.92  | -1.35  | -2.61  | -1.23  | -4.91  | -2.79  |
| -1.96  | -2.22  | -3.52  | -1.02  | -2.07  | -0.73  | -0.50  | 0.30   | 0.23   | -0.07  | 0.81   | 1.90   | 0.08   | 0.56   | 0.41  | 0.28   | 0.72  | 0.82   | 0.50   | 0.53  | 0.24  | -0.37  | 0.16   | -0.59  | -0.28  | -0.55  | -3.54  | -1.17  |
| 1.17   | 5.59   | 3.30   | 2.19   | 1.63   | 4.13   | 3.41   | 4.15   | 2.21   | 1.61   | 3.74   | 3.68   | 3.11   | 2.09   | 1.13  | 1.45   | 0.63  | 0.70   | 1.26   | 0.87  | 1.88  | 1.62   | 3.36   | 1.96   | 0.52   | 0.71   | 1.22   | 0.88   |
| -1.41  | -1.57  | -2.23  | -1.09  | -4.00  | -1.12  | -1.15  | 0.27   | 0.39   | -0.01  | 0.84   | 1.37   | -1.15  | -2.09  | 2.40  | 3.93   | 3.14  | 3.71   | 4.78   | 4.99  | 4.29  | 11.76  | 9.39   | 9.33   | 9.83   | 7.48   | 6.02   | 10.15  |
| 3.03   | 1.86   | 3.90   | 5.28   | 2.22   | 4.63   | 1.85   | 3.58   | 3.04   | 2.26   | 3.31   | 3.89   | 2.16   | 3.11   | 0.34  | -0.79  | 0.69  | -0.56  | -0.29  | -0.21 | 0.03  | -3.23  | -1.27  | -1.77  | -3.32  | -2.02  | -4.37  | -2.17  |
| -0.26  | -0.25  | -0.19  | 2.10   | 0.02   | -0.39  | 0.68   | 1.87   | 2.00   | -0.57  | 1.35   | 2.15   | 1.47   | 1.00   | 0.36  | -0.05  | -0.24 | 0.78   | 0.76   | 0.39  | 0.07  | -1.79  | -1.06  | 0.81   | -2.43  | -1.88  | -4.18  | -2.24  |
| -3.15  | -4.54  | -4.07  | -0.95  | -1.34  | -7.79  | 2.70   | 7.80   | 6.83   | 3.15   | 5.01   | 9.48   | 2.75   | 3.43   | 0.79  | 1.09   | 0.15  | 1.82   | 0.33   | 0.64  | -0.15 | 1.62   | 0.52   | 1.27   | -1.16  | -1.21  | -3.58  | -4.63  |
| -2.72  | -5.49  | -10.65 | -2.94  | -1.01  | -9.94  | 3.42   | 6.66   | 4.65   | 3.67   | 4.17   | 8.85   | 3.88   | 4.51   | -0.39 | -0.31  | 0.16  | 2.55   | 0.73   | 1.18  | 1.46  | 1.02   | 1.24   | 2.02   | -4.17  | 0.06   | -4.66  | -5.57  |
| -23.35 | -28.72 | -22.19 | -29.49 | -24.07 | -23.43 | -11.65 | -17.63 | -15.90 | -14.71 | -16.17 | -17.42 | -10.88 | -11.95 | 0.21  | 0.85   | 1.62  | 0.10   | 1.55   | 0.41  | 0.32  | -0.33  | 0.52   | -1.43  | -3.81  | -3.03  | -3.59  | -7.01  |
| -4.54  | -5.26  | -4.66  | -6.75  | -7.71  | -6.67  | -5.88  | -8.97  | -5.21  | -2.95  | -4.53  | -0.71  | -3.43  | -0.54  | -1.25 | -2.68  | 1.21  | -1.65  | -0.75  | -0.41 | 0.11  | -3.48  | -1.38  | -2.85  | -2.49  | -2.18  | -3.11  | -3.05  |
| -7.72  | -9.48  | -9.90  | -13.10 | -11.28 | -9.16  | -5.89  | -16.26 | -9.41  | -6.83  | -9.22  | -4.51  | -7.98  | -4.26  | -0.93 | -1.29  | 0.80  | 0.76   | -0.33  | 1.01  | 1.45  | -2.50  | -3.05  | -2.39  | -1.84  | -1.11  | -3.34  | -2.99  |
| 0.86   | -3.10  | -4.97  | 0.70   | 0.06   | -7.17  | 0.33   | 2.17   | 1.98   | 0.57   | -0.87  | 0.62   | 1.48   | 2.10   | 1.07  | 0.47   | 0.90  | 0.49   | 1.19   | 0.50  | 2.32  | 1.76   | 1.41   | 3.42   | -2.83  | 1.10   | -0.26  | -1.05  |
| -17.11 | -14.68 | -16.85 | -17.92 | -19.28 | -19.11 | -12.66 | -13.81 | -17.77 | -14.69 | -18.12 | -18.35 | -16.32 | -19.56 | -8.48 | -12.37 | -9.74 | -10.12 | -10.46 | -9.15 | -8.67 | -16.89 | -14.10 | -16.95 | -16.72 | -13.46 | -16.89 | -12.49 |
| 0.97   | 1.17   | 0.85   | 1.67   | 1.64   | 1.71   | 1.59   | 2.55   | 1.71   | 2.92   | 2.03   | 2.81   | 1.52   | 2.18   | 0.98  | 1.55   | 1.06  | 1.16   | 0.93   | 1.32  | 0.62  | 2.42   | 0.99   | 0.71   | 1.29   | 1.46   | 1.23   | 0.65   |
| 2.75   | 0.32   | 1.03   | 1.24   | 0.46   | 4.19   | 1.97   | 5.13   | 2.74   | 1.42   | 0.86   | 2.44   | 1.79   | 3.72   | 0.71  | 0.24   | -2.20 | -1.23  | -0.94  | -1.42 | 0.84  | 3.44   | -0.63  | 2.70   | 1.35   | 0.46   | 0.35   | 0.87   |
| -1.07  | -1.12  | 0.08   | -0.06  | -0.13  | -0.43  | -1.06  | 0.88   | 0.42   | 0.19   | 1.51   | 1.43   | -0.11  | 1.92   | -0.28 | 0.55   | -0.88 | 0.71   | -0.44  | 0.97  | 0.24  | -2.23  | -0.40  | 0.95   | -0.44  | -0.78  | -2.59  | -1.38  |
| -0.11  | -0.77  | -1.35  | 1.03   | -0.11  | -0.48  | -0.20  | -0.87  | 0.49   | -0.50  | 1.08   | 1.69   | -0.39  | -0.04  | -1.24 | -0.33  | -0.06 | -0.80  | 0.38   | 0.73  | 0.43  | -1.79  | -2.21  | -0.65  | -1.82  | -1.46  | -3.78  | -1.85  |
| 0.38   | 0.16   | 0.79   | 1.06   | 0.09   | 1.43   | 1.39   | 3.81   | 3.42   | 2.91   | 3.57   | 2.25   | 1.82   | 1.57   | 0.26  | -0.08  | -1.10 | 0.04   | 0.16   | 0.22  | -1.36 | -0.99  | -0.37  | -0.83  | 0.37   | -0.02  | 0.86   | -0.04  |
| 1.01   | -2.11  | 17.74  | -7.61  | -3.68  | -0.64  | -11.19 | 4.23   | -4.53  | -3.89  | 7.70   | -0.67  | -5.14  | 1.71   | -1.12 | 2.89   | -1.95 | -1.00  | 1.72   | 0.60  | 2.75  | -0.94  | -2.05  | 0.25   | 4.19   | -5.83  | -3.44  | -5.98  |
| 4.31   | 2.02   | 15.83  | -1.06  | -1.80  | 5.08   | -14.63 | 4.30   | -2.73  | -2.63  | 6.85   | -1.79  | -6.14  | -0.77  | -1.35 | 2.92   | -1.67 | 2.38   | 1.63   | 0.41  | 4.25  | -0.46  | -2.51  | 0.97   | 3.82   | -6.88  | -3.02  | -7.09  |
| 9.72   | 7.43   | 16.79  | 7.10   | -2.05  | 13.10  | -23.61 | 3.35   | -3.31  | -3.01  | 5.42   | -5.76  | -12.99 | -2.50  | 1.06  | 2.24   | -1.78 | 3.53   | 0.58   | 1.57  | 4.88  | -1.77  | -3.90  | 2.39   | 7.20   | -9.70  | -0.71  | -11.23 |
| -2.37  | -4.69  | -6.89  | -4.26  | -2.08  | -5.71  | 2.76   | 3.36   | 5.14   | 4.30   | 3.56   | 6.69   | 5.67   | 4.33   | -1.86 | -2.25  | -2.73 | -0.01  | -3.67  | -1.28 | -3.80 | -3.94  | -2.83  | -3.38  | -6.12  | -4.93  | -3.28  | -6.07  |
| -4.19  | -7.72  | -10.39 | -7.23  | -3.66  | -7.51  | 2.49   | 7.25   | 5.59   | 5.36   | 5.10   | 6.88   | 5.03   | 4.30   | -3.26 | -3.09  | -3.10 | 0.32   | -2.72  | -1.94 | -2.67 | -3.62  | -2.74  | -3.91  | -7.30  | -5.07  | -5.20  | -7.70  |
| -12.64 | -15.27 | -16.10 | -14.22 | -14.81 | -12.90 | -12.73 | -14.57 | -12.33 | -9.30  | -11.19 | -12.99 | -11.94 | 7.64   | 8.43  | 7.7    |       |        |        |       |       |        |        |        |        |        |        |        |

|        |        |        |        |        |        |        |        |        |        |        |        |        |        |        |        |        |        |        |        |       |        |        |        |        |        |        |        |
|--------|--------|--------|--------|--------|--------|--------|--------|--------|--------|--------|--------|--------|--------|--------|--------|--------|--------|--------|--------|-------|--------|--------|--------|--------|--------|--------|--------|
| 0.46   | 1.00   | -0.79  | 3.20   | 3.42   | 1.30   | 1.24   | -2.16  | -1.13  | -0.30  | 1.90   | 7.71   | 0.28   | 2.25   | -3.62  | -2.96  | -4.08  | -2.72  | -2.50  | -2.35  | -2.34 | -7.84  | -5.72  | -7.34  | -10.34 | -7.64  | -12.06 | -7.78  |
| 2.50   | 1.18   | 0.88   | 3.17   | 2.41   | 1.52   | -0.12  | -0.36  | 0.74   | 0.11   | 1.22   | 6.86   | 0.56   | 1.24   | -3.48  | -2.42  | -2.46  | -2.62  | -2.57  | -2.48  | -2.66 | -6.42  | -5.88  | -6.32  | -5.76  | -5.80  | -10.23 | -6.29  |
| 0.93   | 0.52   | -0.06  | 0.95   | 2.93   | 1.92   | 1.91   | 0.40   | 0.49   | 2.30   | 1.82   | 4.46   | 2.68   | 1.64   | -1.13  | -1.10  | -1.01  | -0.92  | -0.52  | -0.38  | -1.00 | -2.84  | -2.81  | -0.78  | -2.03  | -2.12  | -9.63  | -2.95  |
| 1.61   | 3.95   | 2.03   | 5.37   | 0.04   | 2.39   | 6.18   | 4.96   | 4.29   | 4.79   | 5.25   | 5.10   | 4.81   | 6.46   | 3.05   | 8.03   | 0.56   | 2.27   | 1.68   | 2.22   | 1.59  | 5.18   | 1.19   | 4.91   | 2.54   | 3.07   | 0.86   | 3.58   |
| 0.28   | 0.21   | 1.34   | 2.24   | 1.37   | 2.21   | 0.46   | 0.35   | 1.10   | -0.68  | 1.68   | 2.34   | 1.91   | 1.70   | 5.70   | 5.04   | 5.33   | 3.05   | 5.46   | 5.15   | 5.66  | 9.50   | 7.05   | 8.57   | 12.12  | 9.57   | 6.05   | 11.39  |
| 2.21   | 1.23   | -0.01  | 3.55   | 3.65   | 3.46   | 3.94   | 1.70   | 1.14   | 2.90   | 4.46   | 3.32   | 3.49   | 4.18   | 0.23   | 1.91   | 0.45   | 1.07   | 2.42   | 2.67   | 1.74  | 0.19   | -1.05  | 0.74   | -2.33  | -0.58  | -8.07  | -0.96  |
| 13.24  | 10.70  | 6.44   | 14.30  | 11.73  | 11.37  | 17.01  | 23.81  | 21.22  | 15.77  | 20.85  | 28.19  | 18.68  | 20.02  | -5.29  | -6.01  | -6.15  | -4.52  | -5.16  | -5.62  | -4.71 | -7.28  | -7.66  | -6.27  | -10.83 | -7.61  | -13.11 | -8.01  |
| 22.32  | 19.59  | 12.58  | 25.91  | 22.76  | 18.79  | 28.88  | 37.91  | 34.24  | 28.08  | 34.32  | 43.67  | 31.08  | 33.78  | -9.84  | -10.25 | -10.44 | -7.11  | -9.66  | -8.17  | -7.66 | -11.69 | -11.17 | -10.86 | -17.19 | -11.54 | -15.26 | -15.51 |
| -13.43 | -16.23 | -21.87 | -10.22 | -14.82 | -14.68 | -7.62  | -11.86 | -10.15 | -9.43  | -12.23 | -10.25 | -9.09  | -11.84 | 3.97   | 3.60   | 4.21   | 3.85   | 4.41   | 6.19   | 4.89  | 5.46   | 3.57   | 4.28   | 4.11   | 0.81   | 1.08   | 4.64   |
| -5.80  | -7.90  | -12.77 | -3.85  | 0.75   | -5.64  | 3.16   | 5.43   | 4.94   | 2.73   | 3.31   | 6.24   | 3.48   | 4.28   | 0.91   | 0.22   | 0.64   | 0.89   | 0.97   | 0.63   | -0.27 | 0.12   | 0.66   | 2.26   | -3.09  | -1.45  | -3.48  | -4.00  |
| -1.86  | -6.45  | -16.21 | 0.87   | 3.72   | -5.84  | 7.62   | 10.21  | 9.80   | 7.44   | 5.68   | 10.47  | 7.09   | 8.30   | 1.31   | 0.69   | 1.13   | 2.49   | 1.47   | 1.62   | 0.65  | 1.63   | 0.46   | 1.01   | -5.04  | -1.18  | -3.47  | -4.53  |
| -24.08 | -32.85 | -28.44 | -30.13 | -25.52 | -23.51 | -15.03 | -20.53 | -19.62 | -20.05 | -19.84 | -15.39 | -15.67 | -15.19 | -3.11  | -0.37  | 0.57   | -0.11  | -1.57  | -1.18  | -1.64 | -1.39  | 0.54   | -0.60  | -3.18  | -2.67  | -6.44  | -4.75  |
| 1.16   | -0.10  | 0.02   | 0.91   | 0.22   | 1.54   | 1.04   | 2.53   | 2.28   | -0.53  | 0.10   | 3.01   | 1.32   | 2.77   | 0.07   | -0.81  | -1.33  | -0.32  | 0.57   | 0.10   | 0.09  | -2.47  | -1.50  | -1.60  | -1.72  | -0.83  | -3.96  | 0.43   |
| -0.83  | -0.51  | -0.59  | -0.61  | -0.51  | 0.15   | 0.18   | 1.71   | 0.74   | -0.69  | 0.54   | -0.36  | 0.18   | 1.66   | -0.03  | 0.57   | -0.01  | 0.83   | 1.06   | 1.15   | 0.08  | 0.77   | 1.75   | -0.13  | 1.39   | 1.09   | -1.16  | 0.48   |
| 1.94   | 1.03   | 2.44   | 1.61   | 0.34   | 1.02   | 1.98   | 2.45   | 3.47   | 1.55   | -0.10  | 0.28   | 2.34   | 3.22   | -2.01  | -0.50  | -1.61  | -1.33  | -1.27  | -0.35  | -1.70 | -4.15  | -4.64  | -3.81  | 6.32   | -4.51  | -6.91  | -4.76  |
| 0.21   | -0.48  | -0.25  | -2.67  | 1.33   | 0.64   | 1.01   | -8.54  | -11.59 | -17.33 | -17.32 | 4.41   | 3.04   | 4.65   | -0.47  | -0.24  | -1.75  | -1.50  | 0.09   | -1.03  | -1.15 | -1.47  | -0.33  | -1.16  | -0.84  | -0.97  | -2.27  | 0.45   |
| 0.10   | 0.99   | 0.79   | -0.02  | 0.18   | 0.90   | 1.59   | 2.37   | 1.76   | 1.93   | 2.59   | 2.85   | 0.34   | 3.01   | 1.11   | 0.26   | 0.79   | 1.90   | 1.50   | 1.53   | 1.31  | -0.02  | 0.43   | 0.17   | 1.06   | 1.23   | -2.20  | 1.32   |
| 0.49   | 0.55   | 0.49   | 0.62   | -0.79  | 1.94   | 1.25   | 15.31  | 18.70  | 19.49  | 16.39  | 8.31   | 1.59   | 2.36   | 1.25   | -0.09  | 0.59   | 0.87   | 0.90   | 2.30   | -0.81 | -1.13  | 0.02   | 1.10   | -0.28  | -0.39  | -1.88  | 2.38   |
| 2.51   | 0.89   | 0.75   | 1.24   | 0.33   | 2.09   | 2.32   | 2.67   | 2.76   | 2.28   | 3.13   | 2.02   | 2.37   | 2.54   | 2.57   | 1.77   | 2.94   | 2.27   | 2.02   | 3.52   | 2.72  | 3.23   | 0.79   | 2.51   | 2.37   | 1.75   | 1.46   | 2.62   |
| 1.53   | 0.99   | 1.18   | 2.23   | 1.01   | 1.61   | 2.08   | 1.67   | 2.86   | 3.20   | 3.17   | 2.45   | 2.16   | 3.69   | 1.94   | 2.38   | 1.47   | 2.01   | 1.63   | 1.87   | 1.62  | 2.06   | 1.83   | 2.28   | 2.70   | 0.99   | 0.21   | 3.32   |
| 2.25   | 0.99   | 1.63   | 1.02   | 2.24   | 0.87   | 2.85   | 3.09   | 2.87   | 3.08   | 3.74   | 1.10   | 3.99   | 0.93   | 1.77   | 0.73   | 1.12   | 1.94   | 0.93   | 1.91   | 2.34  | 1.47   | 0.94   | 2.60   | 1.57   | 0.10   | -2.72  | 0.67   |
| -1.86  | -2.48  | -4.38  | -1.71  | -2.33  | -1.78  | 0.69   | 1.90   | 1.02   | 1.48   | 3.07   | 4.46   | 1.81   | 2.19   | 0.10   | 0.71   | 1.35   | -0.19  | 0.44   | 1.74   | 0.74  | -2.27  | -1.10  | -1.47  | -3.10  | -1.47  | -5.41  | -3.01  |
| -3.25  | -0.02  | -4.02  | -2.03  | -3.12  | -1.56  | -0.84  | -1.91  | -0.29  | -1.30  | 0.91   | 1.54   | 0.01   | 0.61   | 0.37   | 1.28   | 0.36   | 0.97   | 0.90   | 0.72   | 0.27  | -0.51  | -0.23  | -0.36  | -1.00  | -1.24  | -3.99  | -0.60  |
| 0.10   | 17.52  | 4.03   | 3.69   | 1.82   | 4.07   | 1.57   | 6.76   | 3.92   | 3.59   | 4.25   | 4.55   | 2.52   | 2.77   | 0.68   | 1.31   | 0.92   | 0.22   | 1.17   | 1.58   | 1.49  | 1.54   | -0.29  | 0.87   | 0.68   | 1.18   | 0.07   | 0.45   |
| -3.64  | -3.29  | -2.85  | -1.13  | -4.99  | -0.85  | -1.44  | -1.50  | -1.73  | -0.43  | 0.42   | 0.79   | -0.67  | -0.78  | 3.51   | 5.72   | 2.58   | 3.83   | 4.85   | 5.88   | 4.15  | 11.64  | 9.73   | 10.37  | 9.70   | 8.02   | 5.97   | 9.98   |
| 3.45   | 2.51   | 2.40   | 5.80   | 2.72   | 4.55   | 2.86   | 3.58   | 2.37   | 2.36   | 3.10   | 3.21   | 2.72   | 3.10   | 0.20   | -1.10  | 0.46   | -0.73  | -0.42  | -0.23  | 0.66  | -2.65  | -1.63  | -1.96  | -3.54  | -2.29  | -4.38  | -1.72  |
| -0.63  | 0.53   | -0.99  | 2.45   | 0.37   | -0.17  | 2.00   | 3.36   | 0.50   | 0.57   | 1.83   | 1.99   | 3.81   | 1.65   | -0.28  | 0.36   | -0.41  | 1.43   | 1.11   | 0.41   | -0.88 | -1.47  | -1.25  | -0.91  | -2.41  | -2.72  | -3.47  | -2.35  |
| -0.67  | -1.41  | -3.71  | 4.33   | 2.63   | -5.08  | 7.77   | 13.05  | 9.10   | 5.88   | 8.52   | 14.13  | 6.64   | 6.15   | 1.70   | 1.49   | 0.11   | 1.99   | 0.10   | 1.67   | 0.20  | 1.69   | 0.47   | -1.48  | -3.08  | -1.47  | -3.13  | -5.72  |
| -1.31  | -3.76  | -10.34 | 0.40   | 2.05   | -9.71  | 7.30   | 12.13  | 8.42   | 6.78   | 8.04   | 12.45  | 6.75   | 7.22   | -0.54  | 0.37   | 0.81   | 2.31   | 1.08   | 1.65   | 0.88  | 0.72   | 1.31   | 1.93   | -5.02  | -0.32  | -1.70  | -5.66  |
| -32.93 | -40.19 | -33.95 | -42.46 | -35.71 | -30.80 | -19.92 | -27.61 | -25.97 | -22.59 | -24.52 | -24.89 | -18.99 | -21.97 | -0.93  | -1.58  | 2.05   | -0.39  | 0.40   | -1.23  | 0.19  | -0.42  | -0.90  | -1.10  | -3.62  | -3.34  | -2.71  | -7.00  |
| -7.60  | -8.90  | -8.24  | -13.95 | -12.17 | -10.31 | -9.14  | -14.53 | -9.19  | -6.19  | -8.41  | -3.65  | -7.53  | -3.92  | -1.96  | -0.59  | 0.27   | -0.54  | -1.63  | -0.35  | -1.33 | -3.52  | -3.09  | -2.96  | -4.32  | -2.40  | -3.71  | -3.51  |
| -13.10 | -15.33 | -15.15 | -21.37 | -18.84 | -13.30 | -14.59 | -23.69 | -15.71 | -11.36 | -14.17 | -9.37  | -14.23 | -9.97  | -1.67  | -0.59  | -0.61  | -0.43  | -1.62  | -0.15  | 0.03  | -1.38  | -2.38  | -2.05  | -1.88  | -0.18  | -2.77  | -2.73  |
| -1.79  | -5.87  | -5.95  | -4.69  | -1.65  | -8.92  | 1.91   | 1.97   | 0.49   | 0.12   | -1.18  | 0.97   | 1.42   | 2.86   | 0.18   | 0.26   | 0.91   | 0.35   | 0.56   | 2.35   | 2.07  | 1.88   | 1.72   | 3.66   | -3.57  | -0.86  | -1.37  | -2.21  |
| -16.95 | -17.28 | -18.19 | -19.71 | -19.75 | -20.40 | -15.59 | -15.05 | -20.07 | -16.33 | -19.18 | -19.66 | -18.37 | -21.79 | -10.31 | -13.25 | -11.50 | -11.74 | -10.97 | -10.79 | -9.75 | -18.90 | -16.43 | -19.84 | -18.75 | -14.99 | -18.53 | -14.87 |
| 1.21   | 1.15   | 1.25   | 1.82   | 1.94   | 2.34   | 2.72   | 2.48   | 2.77   | 2.08   | 2.28   | 2.96   | 1.59   | 2.99   | 0.37   | 1.72   | 0.95   | 1.47   | 0.94   | 1.31   | 0.91  | 1.98   | 1.28   | 1.01   | 0.84   | 1.03   | 4.07   | 1.05   |
| 3.55   | 0.85   | 1.55   | 2.63   | 0.92   | 3.83   | 1.83   | 6.21   | 5.85   | 2.23   | 3.17   | 3.14   | 2.26   | 4.19   | -1.32  | 0.29   | -1.34  | -0.63  | -0.75  | -0.51  | 1.40  | 4.12   | 0.92   | 2.56   | 1.85   | 0.39   | 0.47   | 0.94   |
| -1.44  | -1.44  | -1.05  | 0.54   | -0.32  | -0.25  | 0.25   | 0.99   | 0.26   | 0.27   | 3.32   | 1.53   | 0.94   | 1.65   | -0.77  | 0.25   | 0.16   | 0.69   | -0.11  | 1.71   | 0.86  | -1.10  | -0.52  | 2.66   | -1.84  | -0.49  | -3.27  | -1.15  |
| 0.36   | -0.61  | -0.92  | 0.67   | 0.15   | -0.83  | 0.09   | -0.88  | 1.43   | -0.26  | 1.04   | 2.19   | 0.22   | -0.43  | -1.03  | 0.16   | -0.41  | -0.59  | 0.57   | -0.17  | -0.47 | -2.11  | -1.83  | -1.38  | -1.71  | -1.27  | -3.69  | -1.43  |
| 0.19   | 0.34   | 0.36   | 1.29   | 0.29   | 0.76   | 1.56   | 3.78   | 3.70   | 3.52   | 3.76   | 2.35   | 0.97   | 1.56   | -1.72  | -0.07  | -0.56  | 0.24   | 0.43   | 0.54   | -0.19 | -1.11  | -1.17  | -1.61  | -1.48  | -1.55  | -2.14  | 0.21   |
| -8.67  | -2.13  | 19.18  | -7.57  | -4.01  | 1.10   | -10.71 | 4.41   | -1.06  | -3.12  | 7.43   | 0.49   | -5.83  | -0.28  | -1.63  | 3.60   | -1.54  | -1.60  | -1.33  | 0.76   | 2.52  | 0.05   | -2.23  | -3.00  | 4.32   | -6.33  | -4.81  | -7.34  |
| -2.48  | 2.32   | 18.26  | -0.41  | -1.51  | 5.66   | -15.82 | 4.38   | 0.17   | -2.60  | 7.00   | -1.76  | -7.29  | -1.53  | -2.12  | 3.67   | -1.48  | 2.08   | -1.29  | -0.39  | 3.31  | -0.67  | -2.61  | -5.86  | 5.15   | -7.52  | -4.70  | -8.90  |
| 3.40   | 8.45   | 18.86  | 7.83   | 1.31   | 13.50  | -23.57 | 3.24   | -0.23  | -2.80  | 5.81   | -3.60  | -13.77 | -5.21  | -0.41  | 3.06   | -0.57  | 2.86   | 2.15   | 0.75   | 3.60  | -1.64  | -3.22  | -7.75  | 7.47   | -10.18 | -1.89  | -13.54 |
| -2.08  | -4.70  | -6.65  | -4.10  | -1.95  | -4.57  | 3.63   | 9.54   | 6.07   | 6.62   | 5.90   | 8.53   | 7.25   | 4.34   | -2.55  | -2.90  | -2.47  | -0.96  | -3.37  | -2.67  | -4.45 | -4.11  | -2.83  | -2.49  | -6.74  | -6.20  | -3.78  | -6.69  |
| -3.40  | -7.63  | -10.92 | -7.01  | -3.29  | -7.59  | 5.51   | 9.45   | 6.81   | 6.90   | 6.55   | 8.53   | 6.37   | 5.58   | -4.35  | -3.76  | -3.50  | -0.16  | -3.39  | -2.52  | -3.79 | -3.72  | -3.25  | -5.05  | -8.48  | -6.43  | -6.02  | -9.11  |
| -18.29 | -17.75 | -19.21 | -15.76 | -20.80 | -17.44 | -17.86 | -21.45 | -16.21 | -13.67 | -14.79 | -16.88 | -15.31 | -15.98 | 8.05   | 9.40   | 8.86   | 7.90   | 11.46  | 9.44   | 7.95  | 7.46   | 8.34   | 8.22   | 7.07   | 6.12   | 9.02   | 7.32   |
| 1.38   | 1.61   | 2.01   | 3.40   | 2.90   | 3.20   | 7.35   | 6.06   | 4.42   | 7.81   | 7.60   | 5.12   | 5.07   | 6.38   | -1.18  | 0.47   | -0.07  | 0.04   | 1.01   | 0.37   | 1.37  | -2.99  | -2.15  | 2.72   | -2.55  | -1.48  | -3.28  | -2.63  |
| 28.58  | 34.86  | 33.70  | 49.29  | 37.06  | 28.36  | 37.34  | 56.14  | 48.39  | 35.57  | 34.00  | 43.88  | 28.74  | 28.77  | 2.89   | 3.01   | -0.89  | 1.19   | 2.55   | 2.73   | 3.62  | 6.68   | 2.34   | -1.54  | -3.19  | -1.81  | -1.06  | -6.01  |
| 0.20   | 2.54   | -0.42  | -2.09  | -0.89  | -2.01  | 3.27   | -1.23  | -0.54  |        |        |        |        |        |        |        |        |        |        |        |       |        |        |        |        |        |        |        |

|        |        |         |        |        |        |        |        |        |        |        |        |        |        |        |        |        |        |        |        |        |        |        |        |        |        |        |        |       |
|--------|--------|---------|--------|--------|--------|--------|--------|--------|--------|--------|--------|--------|--------|--------|--------|--------|--------|--------|--------|--------|--------|--------|--------|--------|--------|--------|--------|-------|
| 3.38   | 3.31   | 2.22    | 4.96   | 0.50   | 1.22   | 5.32   | 5.78   | 6.51   | 3.76   | 6.04   | 5.90   | 4.08   | 6.74   | 3.08   | 1.28   | 1.11   | 1.39   | 2.95   | 2.85   | 1.98   | 5.56   | 1.30   | 5.01   | 3.12   | 3.30   | -2.19  | 3.39   |       |
| -0.46  | 0.08   | 1.61    | 2.26   | 0.49   | 1.45   | 0.90   | 0.77   | 0.27   | -0.56  | 1.67   | 0.88   | 1.46   | 0.97   | 6.53   | 5.83   | 4.71   | 4.16   | 5.48   | 5.71   | 6.02   | 10.15  | 7.71   | 10.27  | 12.96  | 9.84   | 7.21   | 12.67  |       |
| 5.27   | 2.67   | 3.28    | 5.95   | 3.55   | 5.05   | 4.58   | 1.12   | 2.99   | 2.97   | 4.06   | 3.99   | 3.41   | 3.62   | 1.06   | 2.56   | 0.75   | 0.99   | 0.19   | 2.04   | 1.82   | 0.86   | -0.77  | 0.26   | -2.26  | -1.22  | -2.69  | -8.90  |       |
| 16.14  | 12.65  | 10.37   | 17.48  | 13.90  | 14.45  | 19.88  | 25.67  | 23.42  | 19.01  | 24.46  | 31.33  | 20.87  | 22.97  | -6.63  | -7.77  | -6.77  | -5.53  | -6.66  | -6.02  | -4.92  | -7.37  | -8.23  | -6.94  | -11.66 | -7.50  | -13.62 | -8.90  |       |
| 30.35  | 27.37  | 19.77   | 30.11  | 27.46  | 25.70  | 35.10  | 42.88  | 41.86  | 33.59  | 41.87  | 50.33  | 36.16  | 40.10  | -10.82 | -11.60 | -11.81 | -8.37  | -11.06 | -9.62  | -8.29  | -12.92 | -12.23 | -10.84 | -18.14 | -12.02 | -16.84 | -16.87 |       |
| -17.18 | -18.78 | -23.85  | -13.05 | -15.24 | -18.17 | -9.61  | -13.68 | -12.41 | -9.71  | -13.67 | -13.05 | -10.86 | -15.06 | 4.33   | 4.80   | 5.32   | 4.03   | 5.28   | 6.30   | 4.61   | 5.01   | 4.96   | 4.22   | 5.74   | 2.17   | 1.63   | 3.79   |       |
| -3.17  | -5.80  | -12.83  | -3.07  | 1.54   | -5.22  | 5.44   | 7.02   | 7.40   | 4.27   | 3.98   | 7.39   | 4.51   | 5.63   | 0.31   | 0.08   | 0.98   | 1.27   | 0.72   | 0.52   | -0.04  | 0.38   | 0.23   | 1.19   | -2.98  | -2.51  | -3.32  | -4.23  |       |
| 0.65   | -4.86  | -14.23  | 2.55   | 5.68   | -3.42  | 10.99  | 12.91  | 12.32  | 10.26  | 8.81   | 13.03  | 9.93   | 9.64   | 0.79   | 0.35   | 1.18   | 2.62   | 1.18   | 1.15   | 0.83   | 1.75   | 0.22   | 0.78   | -6.41  | -2.14  | -1.94  | -5.68  |       |
| -33.77 | -39.42 | -37.96  | -37.73 | -35.41 | -32.90 | -22.43 | -26.53 | -26.36 | -25.16 | -28.45 | -22.25 | -22.94 | -24.46 | -2.27  | -0.61  | 0.30   | -0.42  | -1.19  | -1.32  | -2.48  | -2.27  | -0.51  | -2.02  | -1.71  | -2.92  | -1.72  | -4.78  |       |
| 0.01   | 0.69   | 0.53    | 0.69   | -0.73  | 2.28   | 1.34   | 3.07   | 2.42   | -0.95  | 0.10   | 1.81   | -0.74  | 1.13   | -0.21  | -0.57  | -1.77  | -0.08  | 0.52   | -0.14  | 1.07   | -2.43  | -2.09  | -1.73  | -1.61  | -1.11  | -3.75  | -0.13  |       |
| -0.44  | -0.53  | -0.90   | -0.15  | -0.13  | -0.18  | 0.23   | 0.89   | 1.10   | -0.46  | 0.32   | 0.07   | 0.46   | 0.58   | 0.56   | 1.11   | 0.35   | 0.59   | 0.55   | 0.78   | -0.51  | 0.91   | 1.48   | 0.65   | 0.75   | 0.92   | -1.86  | -0.20  |       |
| 2.95   | 0.47   | 2.79    | 1.54   | 0.35   | 1.33   | 2.34   | 2.48   | 2.39   | 1.29   | 0.59   | 1.40   | 1.70   | 2.75   | -1.72  | -1.11  | -1.52  | -1.57  | -1.60  | -0.78  | -1.94  | -5.83  | -4.43  | -4.45  | -5.48  | -4.14  | -6.88  | -4.12  |       |
| -0.63  | -0.19  | 0.45    | -2.94  | 1.18   | 2.70   | 2.82   | -8.73  | -12.26 | -17.39 | -17.24 | 4.49   | 3.28   | 4.13   | -0.49  | -0.57  | -2.20  | -1.41  | -0.90  | 0.30   | -1.60  | -1.63  | -0.14  | -0.08  | -0.07  | -1.60  | -1.72  | 0.49   |       |
| 1.14   | 0.69   | 0.57    | -0.11  | -0.15  | 1.41   | 0.92   | 1.93   | 1.05   | 1.40   | 2.73   | 2.71   | 0.34   | 2.86   | 0.77   | -0.02  | 0.84   | 1.87   | 1.46   | 0.73   | 1.40   | 0.19   | -0.08  | -0.01  | 0.43   | 0.76   | -2.59  | -0.06  |       |
| 0.05   | 2.21   | 1.24    | 1.49   | -0.05  | 2.28   | 1.76   | 16.67  | 18.59  | 21.44  | 16.50  | 7.71   | 1.46   | 0.97   | 1.04   | -0.53  | 0.03   | 0.38   | 0.45   | 2.10   | -1.71  | -0.99  | -0.52  | -0.55  | -0.08  | -1.05  | -2.30  | 1.42   |       |
| 0.95   | 1.61   | 0.70    | 1.51   | 1.35   | 0.84   | 2.68   | 2.52   | 2.57   | 1.45   | 3.05   | 1.93   | 1.96   | 2.99   | 1.62   | 2.16   | 2.60   | 2.61   | 2.35   | 2.70   | 3.58   | 3.35   | 1.26   | 2.71   | 2.40   | 0.80   | 0.90   | 2.22   |       |
| 1.56   | 0.09   | 0.70    | 2.42   | 0.86   | 2.49   | 2.03   | 2.50   | 2.41   | 2.98   | 3.36   | 1.95   | 1.71   | 2.50   | 0.90   | 2.55   | 1.61   | 1.68   | 2.36   | 1.93   | 1.36   | 2.69   | 1.78   | 2.78   | 2.39   | 2.34   | 2.13   | 1.80   | 2.80  |
| 1.46   | 0.61   | 0.72    | 1.98   | 1.71   | 0.71   | 1.57   | 2.09   | 1.30   | 3.66   | 2.06   | 0.38   | 3.09   | 1.55   | 1.39   | 0.90   | 1.51   | 1.98   | 2.08   | 1.31   | 2.65   | 2.08   | 0.65   | 3.99   | 2.12   | -0.49  | -1.97  | 1.33   |       |
| -1.73  | -2.76  | -4.50   | -2.16  | -1.00  | -0.97  | 1.13   | 1.26   | 1.80   | 0.75   | 2.93   | 4.70   | 1.25   | 1.02   | 0.37   | 0.33   | 0.94   | -0.10  | 0.63   | 0.91   | 0.49   | -4.35  | -1.92  | -1.22  | -3.64  | -1.85  | -6.04  | -3.56  |       |
| -4.46  | -1.55  | -3.29   | -1.56  | -2.15  | -1.37  | -1.72  | -2.67  | -1.72  | -0.89  | 0.34   | 0.28   | -1.50  | -0.73  | 0.19   | 0.72   | 0.70   | 1.08   | 0.90   | 0.65   | 0.61   | 1.05   | -0.71  | -0.93  | -1.47  | -1.23  | -4.27  | -1.50  |       |
| 1.65   | 18.53  | 4.99    | 3.14   | 2.40   | 6.14   | 4.29   | 4.63   | 2.84   | 3.24   | 3.63   | 3.36   | 4.71   | 2.14   | 0.93   | 1.89   | 1.22   | 0.30   | 0.74   | 0.82   | 0.86   | 0.18   | -0.31  | 2.03   | 0.04   | 0.36   | 0.13   | 0.35   |       |
| -4.25  | -4.82  | -3.95   | -2.37  | -5.85  | -2.21  | -1.85  | -1.86  | -2.07  | -1.58  | -1.72  | 0.21   | -1.92  | -2.12  | 4.28   | 3.67   | 2.61   | 3.92   | 5.86   | 6.43   | 4.29   | 7.03   | 9.68   | 10.69  | 10.27  | 8.22   | 6.72   | 10.09  |       |
| 4.24   | 3.04   | 3.76    | 6.45   | 2.92   | 6.07   | 2.93   | 4.38   | 2.48   | 3.30   | 3.72   | 3.20   | 2.51   | 3.16   | -0.24  | -1.75  | 0.57   | -0.41  | -1.09  | -0.93  | 0.26   | -2.47  | -1.28  | -2.06  | -3.63  | -1.59  | -5.19  | -1.88  |       |
| -0.29  | 0.54   | -1.36   | 2.65   | 0.32   | -0.07  | 2.20   | 1.24   | 1.52   | 1.27   | 2.50   | 1.47   | 2.28   | 1.43   | 0.74   | 0.31   | 0.07   | 0.69   | -1.04  | -0.19  | -0.93  | -1.17  | -1.46  | -1.84  | 0.10   | -3.08  | -2.79  | -4.17  | -2.14 |
| 4.52   | 0.32   | -1.77   | 9.24   | 9.86   | -2.71  | 12.48  | 18.07  | 14.82  | 10.79  | 12.66  | 18.67  | 9.86   | 10.75  | 1.53   | 0.91   | 1.07   | 1.77   | 2.77   | 0.93   | -0.55  | 1.68   | 0.84   | 1.90   | -3.13  | -2.30  | -3.03  | -5.37  |       |
| 2.28   | -4.41  | -10.56  | 3.33   | 6.66   | -8.68  | 12.98  | 16.48  | 13.05  | 10.95  | 12.35  | 18.46  | 11.92  | 11.46  | -0.73  | 0.15   | 1.22   | 2.65   | 0.57   | 0.60   | 0.82   | 1.49   | 0.91   | 2.14   | -6.46  | -1.23  | -1.88  | -7.01  |       |
| -44.87 | -55.44 | -53.55  | -52.40 | -48.25 | -44.77 | -30.19 | -34.78 | -35.64 | -31.55 | -34.09 | -31.24 | -28.83 | -32.30 | -1.46  | -2.29  | 0.72   | -1.02  | -0.60  | -0.36  | -0.99  | -0.07  | 1.09   | 0.19   | -2.14  | -3.15  | -1.35  | -7.55  |       |
| -11.93 | -13.77 | -12.55  | -15.10 | -17.28 | -12.97 | -14.16 | -18.58 | -12.58 | -10.79 | -12.93 | -7.08  | -15.12 | -10.81 | -2.92  | -1.14  | -1.27  | -1.79  | -2.20  | -1.67  | -1.45  | -3.35  | -1.87  | -2.47  | -3.27  | -2.30  | -4.28  | -3.25  |       |
| -20.30 | -23.97 | -23.12  | -25.24 | -26.26 | -20.91 | -21.55 | -27.79 | -21.85 | -18.18 | -22.04 | -14.45 | -23.05 | -17.26 | -3.74  | -1.39  | -1.41  | -1.80  | -2.43  | -1.74  | -0.71  | -1.18  | -1.89  | -1.87  | -2.72  | 0.28   | -2.56  | -2.69  |       |
| -3.75  | -6.63  | -7.91   | -1.30  | -2.51  | -8.80  | -1.23  | -1.84  | -1.34  | -0.01  | -1.66  | -0.67  | 0.42   | -0.61  | 1.79   | 0.08   | 0.50   | 1.10   | -0.42  | 0.93   | 1.47   | 0.83   | 1.50   | 3.23   | -2.21  | 0.20   | -0.60  | -2.17  |       |
| -19.88 | -18.64 | -18.86  | -21.32 | -21.71 | -23.04 | -16.87 | -17.24 | -22.37 | -18.09 | -21.34 | -21.40 | -21.53 | -23.80 | -11.13 | -14.63 | -12.29 | -13.51 | -12.23 | -12.40 | -10.66 | -20.89 | -17.86 | -20.29 | -21.34 | -15.32 | -20.72 | -16.61 |       |
| 1.94   | 1.55   | 1.17    | 1.79   | 1.74   | 2.65   | 2.34   | 3.90   | 2.50   | 3.27   | 1.97   | 3.11   | 2.28   | 2.94   | 0.69   | 2.07   | 1.09   | 1.71   | 0.21   | 1.37   | 1.71   | 2.32   | 1.21   | 1.08   | 1.88   | 1.42   | 0.24   | 0.62   |       |
| 4.01   | 2.53   | 1.73    | 3.42   | 2.68   | 4.85   | 1.94   | 4.85   | 5.59   | 2.63   | 2.26   | 3.68   | 2.61   | 4.08   | 0.35   | 1.35   | -1.24  | -0.21  | -1.23  | -0.82  | 1.59   | 3.46   | 1.37   | 4.16   | 2.88   | 1.53   | 2.43   | 2.30   |       |
| -1.44  | -1.61  | -0.94   | 0.25   | -0.93  | 0.89   | -1.34  | 1.22   | 1.09   | 0.20   | 1.73   | 2.41   | 0.10   | 1.21   | -3.54  | -0.04  | -0.31  | 0.74   | 0.46   | 1.09   | -0.14  | -1.33  | -0.31  | -1.00  | -1.67  | -1.24  | -2.72  | -0.79  |       |
| 0.24   | -0.94  | -0.34   | 1.17   | 0.23   | -0.40  | 1.01   | -0.77  | 0.79   | 0.54   | 1.67   | 1.83   | -0.18  | -0.63  | -2.37  | 0.02   | -0.38  | -0.68  | 0.39   | 0.03   | 0.19   | -2.26  | -2.21  | -1.23  | -1.39  | -1.25  | -3.65  | -1.34  |       |
| -0.12  | -0.17  | 0.56    | 1.33   | -0.22  | 1.74   | 1.25   | 4.92   | 3.17   | 3.05   | 3.76   | 2.02   | 1.73   | 1.86   | -1.38  | -1.05  | -1.06  | -0.21  | -1.16  | 0.62   | -0.05  | -0.68  | 0.28   | -0.58  | -0.31  | -1.75  | -1.94  | 0.16   |       |
| -0.53  | -2.46  | 22.20   | 3.23   | -0.47  | 0.54   | -12.38 | 4.61   | -0.97  | -3.33  | 7.36   | 0.42   | -5.72  | -4.41  | -0.79  | 2.97   | -1.54  | -1.70  | -1.67  | 0.95   | 1.58   | 0.10   | 2.68   | -2.84  | 4.18   | -6.15  | -5.22  | -7.79  |       |
| 3.26   | 2.04   | 20.96   | 11.92  | 1.57   | 5.13   | -16.25 | 4.90   | -0.04  | -3.02  | 7.21   | -2.03  | -7.42  | -4.66  | -0.70  | 2.89   | -1.95  | 1.94   | -1.63  | -0.39  | 3.63   | -1.12  | 1.26   | -5.59  | 4.97   | -4.92  | -3.68  | -8.35  |       |
| 7.94   | 10.07  | 21.52   | 21.67  | 6.56   | 14.44  | -26.47 | 1.36   | -1.06  | -3.50  | 5.76   | -4.96  | -12.97 | -7.96  | 1.07   | 3.03   | -0.62  | 2.90   | -2.27  | 2.55   | 4.55   | 0.64   | 1.32   | -5.73  | 8.03   | -5.72  | -1.62  | -12.59 |       |
| -1.15  | -4.41  | -7.09   | -3.39  | -1.12  | -4.08  | 5.57   | 11.79  | 8.61   | 7.92   | 7.10   | 10.59  | 8.36   | 7.77   | -3.76  | -2.83  | -3.02  | -1.54  | -3.99  | -2.65  | -5.25  | -4.60  | -3.00  | -3.74  | -7.35  | -6.20  | -5.21  | -7.68  |       |
| -3.63  | -5.91  | -10.83  | -6.87  | -3.25  | -6.96  | 5.91   | 12.02  | 8.73   | 8.17   | 7.91   | 10.39  | 8.58   | 6.91   | -5.17  | -4.17  | -4.47  | -0.48  | -5.18  | -3.28  | -5.48  | -3.73  | -3.50  | -4.09  | -8.54  | -7.48  | -5.51  | -9.44  |       |
| -21.11 | -23.94 | -21.92  | -18.50 | -23.33 | -21.82 | -21.39 | -25.81 | -21.39 | -16.76 | -17.41 | -19.31 | -19.88 | -20.30 | 9.77   | 11.38  | 9.74   | 9.15   | 11.56  | 9.92   | 8.76   | 7.59   | 9.00   | 10.83  | 6.66   | 5.41   | 8.86   | 7.63   |       |
| 0.39   | 3.56   | 4.11    | 3.32   | 2.17   | 3.80   | 6.13   | 7.78   | 4.33   | 8.25   | 8.66   | 5.44   | 7.15   | 8.02   | -1.66  | 0.18   | 0.22   | 0.83   | 0.77   | 0.61   | 0.67   | -3.52  | -1.75  | -2.25  | -4.20  | -2.87  | -3.33  | -2.87  |       |
| 46.95  | 55.50  | 50.74   | 58.01  | 54.94  | 45.36  | 54.45  | 63.58  | 60.53  | 51.49  | 45.93  | 48.70  | 49.35  | 45.17  | 5.06   | 4.45   | 0.52   | 2.62   | 3.18   | 4.57   | 5.85   | 0.06   | 2.05   | -2.41  | -5.02  | -2.42  | -1.66  | -7.05  |       |
| -0.35  | 3.06   | -0.54   | -2.18  | 0.08   | -2.06  | 3.79   | -2.10  | -1.29  | -0.21  | -1.15  | -1.76  | 0.36   | -0.30  | 0.31   | 1.40   | 1.88   | 2.38   | 1.53   | 1.21   | 0.89   | 3.69   | 6.17   | 4.22   | -4.64  | -1.05  | 1.69   | -3.94  |       |
| -4.81  | -2.64  | -6.92   | -2.41  | -5.15  | -4.32  | -3.92  | -2.86  | -5.32  | -1.69  | -3.67  | -3.26  | -4.02  | -3.59  | 2.35   | 2.89   | 2.65   | 2.83   | 2.66   | 2.23   | 3.13   | 4.10   | 2.10   | 2.50   | 1.98   | 4.57   | 5.66   | 5.53   |       |
| -4.82  | -4.26  | -5.78   | -5.13  | -6.74  | -6.07  | -4.61  | -5.48  | -6.50  | -2.47  | -5.03  | -1.78  | -4.48  | -3.26  | 2.39   | 0.64   | 2.39   | 2.28   | 2.70   | 1.81   | 2.18   | 5.21   | 1.86   | 1.64   | 2.00   | 3.73   | 2.57   | 4.79   |       |
| -2.52  | -1.68  | -2.95</ |        |        |        |        |        |        |        |        |        |        |        |        |        |        |        |        |        |        |        |        |        |        |        |        |        |       |

|        |        |        |        |        |        |        |        |        |        |        |        |        |        |        |        |        |        |        |        |        |        |        |        |        |        |        |        |
|--------|--------|--------|--------|--------|--------|--------|--------|--------|--------|--------|--------|--------|--------|--------|--------|--------|--------|--------|--------|--------|--------|--------|--------|--------|--------|--------|--------|
| 17.53  | 13.66  | 12.48  | 17.36  | 15.30  | 15.99  | 21.67  | 28.72  | 27.37  | 20.20  | 27.05  | 33.95  | 23.59  | 25.27  | -7.16  | -7.63  | -7.32  | -5.10  | -7.19  | -6.45  | -5.65  | -7.97  | -8.39  | -7.54  | -12.17 | -7.80  | -14.80 | -8.89  |
| 35.17  | 29.16  | 24.21  | 28.28  | 27.28  | 30.21  | 38.98  | 44.52  | 46.67  | 37.70  | 46.10  | 54.43  | 38.72  | 45.04  | -12.47 | -12.68 | -13.41 | -9.17  | -11.91 | -10.69 | -9.37  | -12.77 | -11.76 | -11.37 | -19.16 | -12.39 | -16.20 | -17.41 |
| -17.83 | -20.19 | -25.73 | -14.29 | -15.41 | -19.34 | -10.97 | -15.26 | -13.85 | -12.25 | -15.30 | -14.72 | -12.74 | -17.14 | 3.79   | 4.83   | 6.45   | 5.44   | 5.10   | 6.59   | 5.49   | 4.56   | 4.22   | 4.42   | 5.10   | 1.36   | 1.86   | 3.15   |
| 0.50   | -7.99  | -10.93 | -1.54  | 3.34   | -2.05  | 6.17   | 7.54   | 9.07   | 5.66   | 5.25   | 9.70   | 5.86   | 7.21   | 0.62   | -1.60  | 0.76   | 1.41   | 1.12   | 0.61   | 0.09   | 0.51   | 0.52   | 1.72   | -3.97  | -2.66  | 2.71   | -3.90  |
| 5.06   | -5.49  | -13.38 | 3.10   | 6.70   | -1.65  | 13.77  | 13.69  | 14.51  | 12.57  | 11.47  | 14.73  | 11.88  | 13.13  | -0.63  | -0.03  | 1.44   | 2.88   | 2.03   | 1.45   | 0.17   | 1.19   | 0.65   | 0.89   | -6.54  | -2.01  | -1.21  | -6.99  |
| -36.59 | -48.12 | -46.18 | -41.34 | -37.93 | -39.73 | -26.57 | -27.56 | -31.87 | -29.24 | -31.69 | -23.58 | -26.69 | -29.67 | -2.39  | -0.23  | 0.03   | -0.61  | -2.42  | -1.03  | -2.31  | -0.52  | -0.12  | -1.57  | -2.59  | -2.87  | -5.51  | -3.63  |
| 1.42   | -0.82  | 0.59   | 0.27   | -0.19  | 1.91   | 0.91   | 2.85   | 2.75   | -0.30  | 0.18   | 2.03   | 1.23   | 1.86   | -0.55  | -0.54  | -0.71  | -0.57  | 0.43   | -0.58  | 0.17   | -2.97  | -2.09  | -1.57  | -2.34  | -1.08  | -4.62  | -1.06  |
| -0.64  | 0.05   | -0.26  | 0.54   | 0.18   | 0.42   | 0.13   | 1.36   | 1.08   | -0.12  | -0.43  | -1.26  | 0.52   | 0.56   | 1.37   | 1.06   | 0.27   | 1.38   | 1.57   | 1.75   | 1.16   | 0.75   | 1.66   | 0.24   | 0.82   | 0.85   | -1.58  | 0.35   |
| 2.41   | 1.08   | 2.90   | 2.01   | 0.74   | 2.01   | 5.46   | 2.48   | 2.91   | 0.35   | 0.95   | 1.19   | 2.33   | 2.52   | -5.29  | -1.14  | -1.26  | -1.21  | -2.06  | -2.19  | -1.14  | -6.51  | -5.08  | -4.85  | -6.07  | -4.17  | -7.51  | -4.36  |
| -0.09  | -0.53  | 0.74   | -4.32  | 0.03   | 3.98   | 3.26   | -8.72  | -11.85 | -16.86 | -18.35 | 3.17   | 4.38   | 4.88   | -0.62  | -0.79  | -2.11  | -0.95  | -0.25  | -1.10  | -1.02  | -1.49  | -0.74  | -0.79  | -0.49  | 0.21   | -2.23  | -1.01  |
| 1.61   | 1.48   | 1.15   | 1.00   | 1.13   | 1.86   | 1.09   | 2.08   | 2.24   | 1.42   | 1.95   | 2.84   | 0.99   | 2.45   | 0.79   | -0.60  | 0.67   | 2.21   | 1.95   | 1.45   | 1.74   | 0.11   | 0.66   | -0.05  | 0.39   | 0.54   | -1.57  | 0.78   |
| 0.92   | 0.91   | 1.98   | 1.39   | 0.30   | 3.77   | 4.39   | 16.97  | 19.47  | 22.31  | 18.50  | 7.85   | 2.19   | 3.12   | 0.56   | -0.73  | 0.33   | 0.12   | -1.87  | 1.22   | -1.07  | -1.03  | -0.64  | -1.30  | 0.19   | -0.77  | -2.14  | 0.30   |
| 1.01   | 0.86   | 0.41   | 1.09   | 0.26   | 1.54   | 2.54   | 2.51   | 2.92   | 2.62   | 2.27   | 1.02   | 2.13   | 2.37   | 2.07   | 2.22   | 3.04   | 2.58   | 2.90   | 2.53   | 3.37   | 2.95   | 2.01   | 2.81   | 2.65   | 2.29   | 0.97   | 2.09   |
| 1.06   | 0.50   | 0.47   | 2.27   | 1.10   | 1.08   | 1.80   | 2.52   | 2.66   | 2.56   | 2.83   | 1.70   | 1.33   | 3.00   | 1.05   | 2.67   | 1.81   | 3.00   | 2.55   | 2.96   | 2.33   | 2.41   | 2.06   | 2.82   | 2.98   | 1.65   | 4.48   | 3.42   |
| 2.52   | 0.56   | 2.19   | 1.63   | 1.79   | 0.49   | 1.99   | 2.35   | 2.74   | 2.81   | 3.84   | 1.50   | 1.42   | 2.74   | 0.88   | 1.19   | 2.04   | 2.63   | 2.02   | 2.41   | 2.82   | 1.54   | 1.04   | 3.43   | 2.23   | 0.11   | -2.28  | 1.23   |
| -2.25  | -2.16  | -0.36  | -1.84  | -2.08  | -2.79  | 0.43   | 1.87   | 1.80   | 1.03   | 1.13   | 4.26   | 1.34   | 0.17   | 0.46   | 0.32   | 1.51   | 0.01   | -1.13  | 1.49   | 1.05   | -2.89  | -2.29  | -1.19  | -3.63  | -2.31  | -5.54  | -3.92  |
| -3.48  | -0.45  | 1.04   | -1.81  | -3.40  | -2.22  | -1.77  | -2.42  | -1.01  | -1.57  | -1.06  | 0.41   | -1.48  | -1.75  | 0.17   | 1.06   | 0.51   | 1.50   | 1.92   | 0.89   | 0.95   | -0.58  | -0.46  | -0.83  | -1.82  | -2.10  | -3.44  | -2.15  |
| 1.83   | 24.75  | 20.60  | 3.27   | 1.77   | 5.34   | 2.55   | 7.23   | 3.06   | 2.97   | 5.51   | 4.00   | 4.78   | 1.80   | 0.98   | 2.60   | 0.04   | 0.72   | 0.64   | 1.54   | 3.22   | 0.09   | -1.47  | 1.68   | 0.35   | 2.05   | 0.32   | 0.92   |
| -3.02  | -3.78  | -4.60  | -1.29  | -5.08  | -3.38  | -3.37  | -2.34  | -1.78  | -1.48  | -2.24  | -0.97  | -3.16  | -2.31  | 5.14   | 6.94   | 3.12   | 5.14   | 6.94   | 7.03   | 6.42   | 12.48  | 9.93   | 10.51  | 10.51  | 7.77   | 6.98   | 10.67  |
| 4.69   | 2.16   | 2.81   | 6.39   | 2.48   | 6.87   | 3.32   | 4.52   | 3.81   | 3.08   | 3.45   | 4.42   | 3.61   | 3.14   | -0.28  | -1.34  | 0.34   | -0.59  | -0.11  | -0.25  | -0.02  | -3.22  | -1.90  | -1.36  | -3.68  | -1.72  | -4.74  | -1.50  |
| -0.64  | 0.52   | -1.39  | 1.51   | -0.05  | 2.08   | 2.06   | 3.69   | 1.92   | 1.20   | 1.18   | 1.30   | 3.09   | 2.51   | 0.92   | 1.27   | -0.23  | 1.53   | 0.12   | 0.57   | -0.56  | -1.85  | -1.67  | -1.12  | -2.23  | -3.08  | -4.61  | -1.79  |
| 10.00  | 5.60   | 5.76   | 10.99  | 13.74  | 2.40   | 16.37  | 20.24  | 19.23  | 14.88  | 18.41  | 21.37  | 34.94  | 16.89  | 1.30   | 0.68   | 1.18   | 2.76   | 1.28   | 2.00   | 0.94   | 1.05   | 0.97   | 0.35   | -3.45  | -3.02  | -3.00  | -5.61  |
| 5.80   | -2.62  | -9.10  | 4.67   | 9.43   | -6.38  | 17.62  | 18.74  | 18.55  | 15.57  | 17.77  | 21.64  | 15.87  | 17.08  | -1.02  | -0.49  | 1.30   | 3.71   | 1.50   | 1.29   | 0.22   | 1.34   | 1.03   | 2.13   | -6.82  | -1.70  | -1.72  | -7.51  |
| -54.45 | -62.47 | -63.00 | -55.46 | -53.81 | -60.15 | -38.74 | -37.04 | -42.83 | -37.39 | -41.06 | -36.88 | -35.83 | -42.23 | -0.44  | -2.01  | 1.56   | -1.16  | 0.05   | -0.77  | -0.82  | 0.74   | 0.45   | -1.96  | -3.39  | -3.52  | -1.02  | -7.59  |
| -17.03 | -18.79 | -16.29 | -16.62 | -18.96 | -19.07 | -16.46 | -19.13 | -15.39 | -14.45 | -18.42 | -8.94  | -18.20 | -14.85 | -3.21  | -0.87  | -0.69  | -1.43  | -2.63  | -1.10  | -0.84  | -3.21  | -3.10  | -3.06  | -2.57  | -0.67  | -3.43  | -2.51  |
| -26.75 | -31.35 | -30.00 | -26.93 | -28.21 | -31.20 | -26.59 | -29.91 | -23.77 | -22.58 | -29.72 | -16.65 | -28.85 | -23.42 | -3.68  | -0.89  | -2.17  | -2.85  | -2.33  | -1.56  | -0.39  | -0.88  | -0.90  | -1.04  | -2.04  | 0.04   | -1.51  | -1.65  |
| -4.74  | -8.03  | -10.13 | -2.02  | -3.95  | -11.00 | -0.99  | 0.94   | -0.77  | -2.70  | -2.78  | -0.39  | -2.24  | -1.60  | 0.91   | 0.25   | -0.29  | 1.03   | -0.97  | 2.82   | 2.52   | 2.37   | 0.23   | 3.76   | -2.62  | 0.35   | -0.19  | -3.37  |
| -21.30 | -20.86 | -20.95 | -22.61 | -24.54 | -23.02 | -18.41 | -18.16 | -23.92 | -20.12 | -24.12 | -23.77 | -22.90 | -26.46 | -12.26 | -16.96 | -13.99 | -16.15 | -14.13 | -12.69 | -12.18 | -23.23 | -18.26 | -23.19 | -22.90 | -17.19 | -20.59 | -17.34 |
| 1.96   | 2.14   | 1.13   | 1.89   | 2.45   | 2.46   | 2.05   | 3.89   | 3.24   | 3.63   | 2.59   | 3.58   | 2.42   | 3.46   | 1.12   | 2.17   | 1.34   | 2.56   | 1.10   | 1.30   | 1.93   | 1.74   | 0.96   | 1.52   | 1.93   | 1.05   | 0.77   | 0.62   |
| 3.97   | 2.50   | 2.46   | 3.82   | 3.26   | 5.93   | 0.87   | 5.54   | 5.39   | 4.20   | 3.23   | 4.18   | 2.63   | 5.92   | 0.60   | 1.86   | -0.86  | 0.75   | 0.60   | 0.44   | 3.17   | 2.86   | 2.04   | 3.78   | 3.12   | 0.95   | 1.40   | 0.47   |
| 0.09   | -1.24  | 0.17   | 0.47   | -0.53  | 1.19   | 0.37   | 1.14   | 0.42   | 0.74   | 1.43   | 2.15   | 0.02   | 0.76   | -2.90  | -0.22  | -0.23  | 1.31   | 0.32   | 1.67   | 1.60   | -1.99  | -0.92  | -0.06  | -1.66  | -0.99  | -2.99  | -1.18  |
| 0.30   | -0.53  | -0.08  | 1.26   | 0.42   | -0.67  | 0.06   | -0.69  | 1.74   | -0.15  | 2.06   | 2.15   | 0.33   | 0.12   | -3.10  | 0.61   | -0.37  | -0.33  | 0.90   | -0.05  | 0.61   | -2.30  | -1.76  | -0.72  | -1.77  | -1.46  | -3.57  | -1.53  |
| 1.33   | 0.55   | 0.72   | 1.13   | 0.76   | 2.03   | 2.02   | 4.38   | 3.41   | 4.08   | 3.32   | 3.28   | 0.57   | 1.27   | -0.70  | -0.15  | -0.19  | -0.33  | 0.18   | 0.71   | 1.08   | -1.82  | -0.82  | -1.34  | -0.10  | -1.32  | -2.80  | -0.69  |
| 0.01   | -4.59  | 23.01  | 3.66   | 0.46   | 1.94   | -11.97 | 4.89   | -0.65  | -4.48  | 8.16   | -0.20  | -7.59  | -0.87  | -0.74  | 2.69   | -1.61  | 2.23   | -1.15  | -0.50  | 2.00   | -0.83  | -1.47  | -4.03  | 4.61   | -6.36  | -5.61  | -12.19 |
| 5.12   | -2.00  | 23.47  | 12.00  | 2.96   | 7.11   | -16.85 | 5.33   | 0.41   | -2.55  | 6.42   | -0.87  | -8.80  | -2.81  | -0.74  | 2.67   | -1.71  | 3.28   | -0.98  | -0.81  | 4.27   | 0.14   | -1.35  | -4.02  | 5.13   | -5.34  | -3.40  | -12.77 |
| 9.80   | 5.81   | 23.50  | 22.53  | 7.94   | 16.60  | -27.24 | 4.53   | 0.01   | -3.13  | 5.33   | -4.28  | -14.08 | -5.93  | 1.41   | 3.02   | 0.39   | 5.41   | -1.84  | 0.76   | 4.53   | 0.23   | -2.18  | -6.78  | 8.26   | -6.26  | -1.22  | -16.52 |
| -1.61  | -3.90  | -6.55  | -4.28  | -1.34  | -4.70  | 7.46   | 12.93  | 9.87   | 8.61   | 7.72   | 11.03  | 9.08   | 8.39   | -3.34  | -3.18  | -3.90  | -1.45  | -4.64  | -3.15  | -5.93  | -4.50  | -3.30  | -3.28  | -7.33  | -6.43  | -4.10  | -9.68  |
| -2.79  | -3.36  | -10.37 | -7.27  | -3.80  | -6.35  | 7.30   | 13.01  | 10.46  | 10.19  | 9.37   | 11.97  | 9.55   | 8.15   | -6.99  | -4.33  | -4.37  | -0.82  | -4.51  | -4.21  | -5.83  | -4.05  | -3.66  | -5.11  | -9.37  | -7.48  | -6.61  | -9.10  |
| -24.21 | -23.34 | -20.30 | -17.34 | -23.61 | -24.54 | -22.92 | -28.37 | -23.63 | -21.43 | -24.58 | -22.19 | -22.92 | 11.05  | 12.15  | 10.07  | 8.75   | 13.32  | 11.11  | 9.92   | 9.22   | 9.32   | 9.55   | 6.77   | 6.46   | 8.55   | 7.28   | 6.61   |
| 2.31   | 0.31   | 3.64   | 4.81   | 2.89   | 4.75   | 6.83   | 7.04   | 5.78   | 7.00   | 7.45   | 5.62   | 6.26   | 8.58   | -1.17  | 0.95   | 0.21   | 1.48   | 0.01   | 1.81   | 2.28   | -4.02  | -2.08  | -2.34  | -3.06  | -2.60  | -4.05  | -2.06  |
| 58.81  | 65.91  | 61.30  | 60.35  | 57.47  | 63.60  | 61.21  | 65.19  | 64.95  | 59.19  | 58.50  | 49.23  | 58.10  | 61.41  | 5.38   | 4.53   | 1.30   | 5.48   | 4.29   | 5.12   | 7.17   | -0.11  | 1.31   | -3.50  | -6.57  | -4.14  | -2.68  | -6.49  |
| -0.28  | 3.54   | 0.16   | -1.04  | 0.06   | -1.52  | 5.20   | -1.29  | -2.01  | -1.12  | -0.77  | -1.69  | 0.21   | -0.60  | 1.20   | -0.37  | 2.49   | 2.46   | 1.64   | 2.05   | 1.78   | 4.62   | 5.41   | 3.03   | -4.81  | -1.88  | 1.45   | -2.85  |
| -5.84  | -5.12  | -7.85  | -4.05  | -5.35  | -5.95  | -4.30  | -3.93  | -6.10  | -2.03  | -5.95  | -3.92  | -3.25  | -4.69  | 2.45   | 2.60   | 2.68   | 2.60   | 3.03   | 3.14   | 6.01   | 4.44   | 1.94   | 1.83   | 2.00   | 4.81   | 2.51   | 6.18   |
| -6.53  | -5.28  | -6.95  | -5.76  | -8.02  | -6.87  | -5.88  | -5.01  | -7.72  | -3.01  | -6.89  | -2.54  | -5.39  | -4.91  | 2.64   | 0.74   | 2.57   | 2.01   | 3.24   | 1.63   | 1.47   | 5.07   | 2.09   | 2.30   | 2.04   | 4.36   | 2.72   | 5.11   |
| -2.46  | -2.17  | -3.73  | -1.69  | -4.36  | -3.50  | -2.20  | 3.02   | -0.04  | -0.33  | 0.09   | 6.68   | -1.72  | -1.14  | 2.16   | 0.19   | 0.38   | 1.60   | 2.45   | 1.29   | 1.05   | 2.78   | 0.74   | 0.85   | 0.35   | 3.94   | 0.44   | 3.80   |
| 8.54   | 8.77   | 12.01  | 7.23   | 4.77   | 7.88   | 6.38   | 4.78   | 7.81   | 12.89  | 11.39  | 5.63   | 7.71   | 10.88  | -3.25  | -3.78  | -2.46  | -1.79  | -3.23  | -2.23  | -1.68  | -8.43  | -8.26  | -7.08  | -9.74  | -9.24  | -10.54 | -11.92 |
| 16.71  | 23.55  | 26.40  | 17.90  | 15.36  | 18.52  | 13.27  | 5.93   | 11.50  | 19.60  | 20.54  | 9.54   | 15.18  | 20.26  | -7.00  | -7.02  | -5.69  | -3.58  | -6.42  | -6.12  | -5.12  | -18.79 | -16.16 | -15.92 | -19.20 | -16.99 | -19.96 | -20.59 |
| -10.   |        |        |        |        |        |        |        |        |        |        |        |        |        |        |        |        |        |        |        |        |        |        |        |        |        |        |        |

|        |        |        |        |        |        |        |        |        |        |        |        |        |        |        |        |        |        |        |        |        |        |        |        |        |        |        |        |
|--------|--------|--------|--------|--------|--------|--------|--------|--------|--------|--------|--------|--------|--------|--------|--------|--------|--------|--------|--------|--------|--------|--------|--------|--------|--------|--------|--------|
| 0.52   | -5.15  | -12.53 | -2.16  | 3.79   | -3.71  | 7.31   | 7.26   | 10.03  | 5.70   | 6.63   | 10.08  | 5.60   | 8.90   | 0.28   | -0.52  | 0.96   | 1.11   | 1.16   | 0.73   | 0.21   | 0.16   | -0.96  | 1.52   | -4.07  | -2.55  | -2.29  | -5.14  |
| 5.94   | -5.02  | -14.68 | 1.83   | 7.21   | 0.12   | 14.60  | 13.75  | 15.85  | 13.55  | 11.42  | 16.02  | 12.93  | 14.83  | -1.23  | -0.26  | 1.17   | 2.99   | 1.89   | 1.40   | -0.26  | 1.92   | 1.14   | 0.47   | -7.32  | -2.31  | -1.37  | -7.17  |
| -40.23 | -47.31 | -49.36 | -41.57 | -35.68 | -44.03 | -28.57 | -25.85 | -31.20 | -31.43 | -33.78 | -23.78 | -27.06 | -32.44 | -2.07  | -0.97  | 0.02   | -2.54  | -0.72  | -1.29  | -1.59  | -1.06  | -0.59  | -1.82  | -1.93  | -3.13  | -4.45  | -3.81  |
| 1.16   | -0.27  | -0.42  | 0.59   | 0.00   | 2.38   | 1.06   | 2.79   | 2.97   | -1.28  | 1.21   | 1.76   | 3.17   | 1.94   | -0.46  | -0.86  | -1.19  | -0.63  | 0.57   | -0.50  | 0.79   | -2.40  | -1.55  | -2.81  | -3.39  | -1.14  | -5.60  | -0.98  |
| -0.77  | -0.46  | -0.66  | 0.40   | -0.59  | 0.61   | 1.74   | 1.06   | 1.74   | -0.12  | 0.14   | -0.16  | -0.39  | 0.18   | 1.06   | 0.92   | -0.15  | 1.49   | 1.91   | 1.87   | 1.63   | 0.23   | 1.59   | 1.02   | 1.70   | 1.17   | -2.10  | 0.49   |
| 2.99   | 1.00   | 2.31   | 1.93   | 0.99   | 0.84   | 2.79   | 2.07   | 3.55   | 1.30   | 2.49   | -0.48  | 1.96   | 2.79   | -5.92  | -1.34  | -2.79  | -1.16  | -1.76  | -2.13  | -3.45  | -6.00  | -4.55  | -4.65  | -6.29  | -4.31  | -8.19  | -4.21  |
| 0.87   | -0.65  | -1.02  | -4.08  | 0.84   | 3.10   | 3.57   | -8.96  | -11.68 | -17.34 | -17.27 | 3.30   | 3.83   | 5.52   | -1.00  | -1.12  | -1.85  | -1.28  | -0.66  | -1.51  | -1.34  | -0.72  | -0.26  | -0.08  | -0.90  | -0.90  | -3.03  | -0.73  |
| 1.03   | 1.34   | 1.30   | 0.63   | 0.46   | 2.12   | 1.35   | 1.64   | 2.43   | 1.27   | 2.60   | 2.57   | 0.94   | 3.12   | 0.44   | -0.59  | -0.10  | 1.64   | 1.25   | 0.63   | 1.49   | 0.40   | 0.08   | -0.83  | 0.00   | 0.29   | -1.83  | 0.47   |
| 2.13   | 0.79   | 2.08   | 1.41   | 0.43   | 1.91   | 3.77   | 17.67  | 20.31  | 22.63  | 19.55  | 8.01   | 2.42   | 2.78   | 0.28   | -0.62  | -0.50  | -0.02  | 1.25   | 0.51   | -1.63  | -1.35  | -0.73  | -1.26  | 0.17   | -1.17  | -1.63  | -0.08  |
| 1.46   | 1.54   | 0.37   | 1.57   | 1.01   | 0.95   | 2.12   | 2.60   | 2.23   | 1.38   | 2.28   | 0.74   | 1.78   | 2.76   | 3.12   | 1.83   | 2.26   | 2.32   | 3.25   | 3.42   | 3.09   | 3.66   | 1.67   | 3.88   | 2.62   | 1.97   | 1.44   | 3.10   |
| 1.23   | -0.36  | 0.68   | 2.18   | 0.68   | 1.63   | 2.41   | 1.80   | 5.02   | 3.27   | 2.21   | 1.69   | 1.68   | 2.73   | 1.12   | 3.19   | 2.34   | 2.61   | 2.74   | 2.81   | 2.77   | 2.53   | 2.34   | 2.69   | 2.95   | 2.43   | 0.73   | 2.97   |
| 2.12   | 0.97   | 2.05   | 0.33   | 2.16   | 0.01   | 2.26   | 3.82   | 4.04   | 2.18   | 2.56   | 1.06   | 2.14   | 2.40   | 0.72   | 1.86   | 2.00   | 2.27   | 2.82   | 2.63   | 2.57   | 1.69   | 1.72   | 3.15   | 1.95   | 0.01   | -3.30  | 0.72   |
| -2.57  | -3.51  | -1.30  | -2.64  | -1.24  | -3.70  | 0.65   | 1.49   | 4.34   | 2.00   | 1.76   | 5.34   | 1.21   | -0.17  | -0.06  | 0.03   | 0.31   | 0.31   | 1.01   | 2.04   | 0.99   | -2.56  | -2.84  | -1.78  | -3.48  | -2.48  | -5.04  | -4.35  |
| -3.79  | -1.03  | 0.80   | -0.70  | -1.41  | -3.00  | -1.88  | -0.98  | 1.18   | -1.06  | -0.44  | -0.31  | -1.08  | -0.92  | 0.17   | 0.87   | 0.60   | 1.60   | 1.26   | 0.85   | 1.32   | -0.67  | -0.46  | -0.97  | -1.61  | -2.23  | -4.74  | -1.70  |
| 1.77   | 18.85  | 17.74  | 2.68   | 3.41   | 3.94   | 3.68   | -4.92  | 4.95   | 2.82   | 4.61   | 4.19   | 2.81   | 3.73   | 0.45   | 1.87   | 1.58   | 0.46   | 0.17   | 0.82   | 2.08   | -0.18  | -0.60  | 1.70   | 0.10   | 0.10   | -0.77  | 0.39   |
| -3.58  | -3.75  | -5.45  | -0.29  | -5.24  | -2.38  | -2.90  | -1.62  | -0.64  | -1.01  | -1.79  | -1.21  | -2.31  | -3.15  | 4.24   | 7.19   | 3.59   | 5.55   | 6.41   | 7.10   | 7.09   | 12.01  | 10.86  | 10.80  | 10.52  | 7.99   | 6.26   | 10.34  |
| 5.17   | 2.92   | 7.78   | 7.25   | 3.12   | 6.41   | 3.65   | 4.92   | 4.34   | 2.81   | 3.80   | 4.50   | 3.22   | 3.54   | 0.53   | -1.68  | 0.29   | -0.24  | 0.04   | 0.16   | -0.19  | -2.61  | -2.23  | -1.71  | -3.57  | -1.77  | -3.93  | -1.39  |
| 0.72   | -0.21  | -3.26  | 1.73   | -0.52  | 1.06   | 1.23   | 4.08   | 3.44   | 0.43   | 1.92   | 1.83   | 2.44   | 1.75   | -0.56  | -0.49  | -0.19  | 1.69   | -0.15  | -0.29  | 0.63   | -1.72  | -2.19  | -0.17  | -2.97  | -3.21  | -5.41  | -3.36  |
| 11.90  | 5.11   | 4.89   | 10.38  | 13.32  | 5.50   | 18.88  | 18.33  | 21.17  | 17.94  | 20.08  | 23.94  | 15.96  | 19.23  | 1.04   | 1.10   | 0.41   | 2.51   | 2.94   | 1.23   | -0.82  | 1.63   | 0.82   | 0.57   | -3.84  | -2.94  | -2.86  | -6.09  |
| 6.97   | -2.86  | -10.88 | 3.86   | 9.13   | -4.09  | 19.46  | 17.30  | 20.40  | 18.16  | 19.36  | 22.90  | 18.22  | 19.25  | -0.88  | -0.77  | 1.54   | 2.79   | 0.42   | 1.68   | -0.81  | 1.71   | 0.68   | 1.86   | -7.92  | -1.92  | -0.91  | -7.90  |
| -57.21 | -64.12 | -67.20 | -55.86 | -54.84 | -64.41 | -39.89 | -37.31 | -44.48 | -38.89 | -45.33 | -37.68 | -37.22 | -46.31 | -1.69  | -2.03  | 1.37   | -0.01  | 1.88   | 0.06   | 0.51   | -0.79  | 0.82   | -1.75  | -3.84  | -4.73  | -1.28  | -7.97  |
| -17.81 | -19.05 | -18.33 | -18.81 | -18.22 | -21.50 | -17.27 | -19.21 | -15.48 | -16.49 | -20.14 | -8.27  | -19.85 | -16.30 | -2.92  | -0.85  | -1.32  | -1.64  | -1.22  | -1.86  | -0.56  | -3.76  | -2.59  | -0.76  | -3.09  | -1.09  | -5.34  | -2.09  |
| -30.49 | -33.15 | -32.36 | -28.32 | -27.83 | -35.16 | -26.91 | -29.19 | -24.16 | -25.53 | -33.37 | -17.79 | -31.04 | -25.92 | -2.83  | -0.80  | -1.90  | -3.81  | -2.39  | -1.17  | -0.08  | 0.13   | -1.06  | -1.12  | -0.92  | 0.90   | -0.94  | -1.65  |
| -5.43  | -8.36  | -10.35 | -5.63  | -4.14  | -11.29 | -1.81  | -0.99  | -2.43  | -1.58  | -4.06  | -0.82  | -3.15  | -3.34  | 0.13   | -0.15  | 0.08   | 0.73   | -0.80  | 0.83   | 2.32   | 2.20   | 0.66   | 4.25   | -3.73  | -0.78  | -0.95  | -2.61  |
| -23.48 | -22.67 | -23.36 | -25.21 | -25.88 | -24.96 | -19.70 | -20.25 | -25.90 | -22.00 | -25.33 | -25.97 | -24.08 | -29.10 | -13.67 | -17.85 | -16.17 | -16.28 | -15.08 | -14.08 | -14.74 | -25.19 | -21.30 | -23.66 | -24.76 | -18.57 | -22.36 | -18.74 |
| 2.19   | 1.83   | 3.39   | 2.38   | 2.50   | 2.21   | 2.92   | 3.59   | 3.56   | 2.35   | 2.87   | 2.92   | 2.41   | 3.70   | 0.93   | 2.43   | 1.85   | 2.20   | 1.51   | 1.70   | 2.35   | 2.44   | 1.24   | 0.65   | 2.24   | 2.08   | 0.70   | 0.83   |
| 5.55   | 3.95   | 3.07   | 4.52   | 3.67   | 6.28   | 2.14   | 7.62   | 6.68   | 3.30   | 3.71   | 5.31   | 4.52   | 6.36   | 0.80   | 1.99   | -0.86  | 0.53   | 0.48   | 0.37   | 4.62   | 4.12   | 2.06   | 4.55   | 2.00   | 1.73   | 1.60   | 1.01   |
| -0.53  | -1.08  | 0.14   | 0.95   | -0.43  | 0.32   | 0.66   | 1.30   | 2.39   | 0.59   | 2.21   | 1.85   | -0.10  | 1.41   | -1.61  | 0.01   | 0.61   | 1.39   | 0.88   | 0.93   | 0.30   | -2.09  | -1.30  | 0.98   | -2.08  | -1.87  | -3.15  | -1.70  |
| 0.47   | -1.36  | -0.70  | 1.09   | 0.10   | -0.30  | 1.44   | -0.33  | 2.71   | 0.26   | 1.99   | 2.10   | 0.60   | 0.04   | -3.68  | 0.34   | -0.69  | -0.68  | 0.85   | 0.42   | 1.10   | -2.68  | -1.10  | -1.62  | -1.82  | -1.63  | -4.29  | -2.55  |
| 1.38   | 1.32   | 0.61   | 1.85   | 0.67   | 1.03   | 2.04   | 4.40   | 4.60   | 3.62   | 4.14   | 2.74   | 0.72   | 1.49   | -0.98  | -0.92  | -1.30  | 0.50   | 0.81   | 0.67   | 0.03   | -0.66  | -1.06  | -1.25  | -0.21  | -1.98  | -1.35  | -0.45  |
| 0.32   | -1.83  | 23.01  | 3.20   | -0.72  | 1.83   | -11.48 | 4.24   | -4.04  | -3.36  | 3.40   | 0.08   | -4.65  | 0.47   | -0.80  | 2.54   | -1.69  | 2.56   | -1.62  | -0.24  | 2.01   | -0.93  | -1.66  | -2.54  | 4.46   | -7.18  | -3.57  | -10.60 |
| 4.03   | 3.23   | 25.20  | 11.74  | 2.03   | 7.69   | -16.54 | 5.83   | -1.60  | -2.86  | 5.01   | -0.85  | -5.66  | -2.58  | -1.00  | 2.43   | -1.66  | 3.26   | -1.66  | -0.56  | 4.12   | 0.19   | -1.76  | -4.81  | 5.36   | -6.64  | -2.37  | -11.66 |
| 9.70   | 11.40  | 24.59  | 23.20  | 7.13   | 16.57  | -25.32 | 1.63   | -3.37  | -3.54  | 4.17   | -3.34  | -10.12 | -4.44  | 2.72   | 2.80   | 0.08   | 5.12   | -1.68  | 1.01   | 5.37   | 0.72   | -0.68  | -7.15  | 8.34   | -7.22  | 0.82   | -15.00 |
| -2.12  | -1.57  | -6.78  | -5.54  | -3.13  | -4.82  | 6.03   | 11.34  | 10.19  | 9.29   | 7.96   | 11.28  | 8.84   | 8.69   | -5.10  | -4.84  | -3.15  | -2.30  | -4.81  | -3.72  | -6.82  | -3.62  | -2.88  | -3.08  | -8.57  | -7.32  | -5.14  | -8.77  |
| -3.72  | -7.70  | -11.23 | -8.18  | -4.61  | -7.10  | 7.36   | 11.99  | 10.63  | 10.13  | 10.19  | 11.92  | 10.18  | 8.19   | -7.18  | -4.22  | -5.39  | -1.73  | -5.39  | -4.32  | -7.19  | -4.86  | -3.83  | -5.24  | -10.81 | -8.10  | -5.26  | -10.14 |
| -22.50 | -22.18 | -23.10 | -15.94 | -21.54 | -23.16 | -23.80 | -25.12 | -22.85 | -19.05 | -21.61 | -23.42 | -22.76 | -23.35 | 11.53  | 13.16  | 12.49  | 9.92   | 15.78  | 11.60  | 10.97  | 9.47   | 8.12   | 9.09   | 7.10   | 5.74   | 9.32   | 7.46   |
| 1.50   | 3.55   | 3.73   | 3.38   | 2.54   | 5.55   | 6.19   | 8.27   | 6.20   | 8.60   | 8.01   | 5.32   | 6.59   | 8.36   | -2.07  | -0.03  | -0.91  | 1.59   | 1.27   | 1.68   | 1.39   | -4.29  | -2.38  | -2.85  | -4.80  | -3.14  | -3.61  | -2.95  |
| 61.84  | 66.51  | 63.56  | 60.46  | 57.82  | 67.86  | 62.89  | 63.43  | 67.07  | 62.52  | 61.50  | 49.12  | 58.66  | 66.29  | 5.03   | 3.03   | 0.76   | 5.84   | 3.48   | 4.70   | 6.84   | -2.81  | 0.51   | -4.57  | -8.37  | -5.79  | -3.98  | -8.15  |
| -1.33  | 2.52   | 0.14   | -3.35  | -0.76  | -3.18  | 3.64   | -0.83  | -0.69  | -1.71  | -1.02  | -1.08  | -1.00  | -0.55  | 0.37   | 0.58   | 2.52   | 3.68   | 0.82   | 2.72   | -0.63  | 5.21   | 6.39   | 2.62   | -3.25  | -4.09  | 1.61   | -3.36  |
| -5.41  | -4.39  | -8.70  | -3.26  | -5.86  | -6.41  | -4.81  | -3.54  | -6.55  | -2.86  | -6.72  | -4.11  | -3.60  | -5.58  | 2.15   | 2.71   | 3.30   | 2.45   | 3.31   | 3.73   | 5.99   | 4.99   | 1.46   | 2.10   | 2.17   | 4.38   | 2.51   | 6.35   |
| -7.76  | -5.61  | -7.08  | -5.02  | -7.61  | -8.07  | -6.82  | -5.67  | -8.03  | -3.96  | -7.14  | -3.23  | -5.50  | -5.68  | 3.40   | 6.68   | 2.92   | 2.24   | 3.76   | 2.12   | 1.80   | 4.83   | 1.99   | 1.89   | 2.48   | 4.99   | 2.79   | 5.36   |
| -3.66  | -2.49  | -2.92  | -0.87  | -5.05  | -4.11  | -1.97  | 2.87   | -0.73  | 0.45   | -1.10  | 5.89   | -1.37  | -1.96  | 2.54   | 3.09   | 0.82   | 1.84   | 1.56   | 2.15   | 1.19   | 1.57   | 1.06   | 0.90   | 0.74   | 2.82   | 0.39   | 2.06   |
| 8.49   | 9.11   | 10.53  | 6.84   | 5.22   | 6.57   | 7.35   | 4.38   | 7.10   | 11.48  | 10.64  | 6.13   | 7.15   | 11.62  | -3.99  | -4.54  | -2.87  | -1.54  | -2.68  | -3.34  | -2.45  | -10.46 | -8.99  | -8.76  | -11.31 | -9.63  | -10.73 | -10.99 |
| 16.76  | 24.28  | 26.27  | 18.18  | 15.01  | 18.18  | 13.55  | 6.13   | 10.99  | 20.37  | 22.46  | 9.58   | 15.03  | 21.04  | -8.52  | -8.16  | -6.80  | -4.71  | -6.86  | -7.20  | -6.41  | -20.38 | -17.79 | -17.40 | -19.93 | -18.74 | -22.39 | -22.70 |
| -9.82  | -18.68 | -20.29 | -11.88 | -15.33 | -15.64 | -2.25  | 1.84   | -0.18  | 2.31   | 0.23   | 3.14   | -1.46  | -4.26  | 4.66   | 0.88   | 2.45   | 1.78   | 2.02   | 2.73   | 1.73   | 8.25   | 5.95   | 4.67   | 9.07   | 6.39   | 8.35   | 10.28  |
| 0.81   | 1.30   | 0.94   | 1.40   | 0.94   | 0.26   | 1.04   | 2.46   | 1.88   | 1.30   | 2.39   | 2.74   | 1.17   | 0.72   | -2.90  | 0.44   | -0.64  | 0.81   | 1.01   | 0.93   | 2.00   | -1.05  | 1.04   | 0.63   | -0.65  | 0.22   | 6.32   | 0.05   |
| 1.42   | -0.26  | 2.13   | 1.76   | 0.22   | 0.25   | 1.78   | 2.42   | 5.73   | 3.93   | 2.73   | 4.64   | 0.90   | 2.94   | -4.49  | 0.12   | 0.02   | -0.21  | 1.88   | 0.60   | -0.06  | -0.76  | 2.24   | 0.30   | -1.46  | -0.03  | -1.54  | -0.61  |
| -0.98  | 0.40   | 0.50   | 2.00   | 0.4    |        |        |        |        |        |        |        |        |        |        |        |        |        |        |        |        |        |        |        |        |        |        |        |

|        |        |        |        |        |        |        |        |        |        |        |        |        |        |        |        |        |        |        |        |        |        |        |        |        |        |        |        |
|--------|--------|--------|--------|--------|--------|--------|--------|--------|--------|--------|--------|--------|--------|--------|--------|--------|--------|--------|--------|--------|--------|--------|--------|--------|--------|--------|--------|
| 1.41   | -0.30  | -0.02  | 1.20   | -0.41  | 1.33   | 0.94   | 2.10   | 2.95   | 0.12   | -0.24  | 2.41   | 0.68   | 2.79   | -0.37  | -1.02  | -0.75  | -2.01  | -0.34  | -0.37  | -0.39  | -3.24  | -2.14  | -1.88  | -3.65  | -0.80  | -5.21  | -1.42  |
| -0.47  | -0.41  | -0.98  | 0.27   | -0.69  | 0.68   | 0.25   | 1.23   | 1.14   | 0.15   | 0.93   | -1.04  | 0.46   | 0.85   | 1.27   | 1.64   | 0.16   | 1.46   | 1.06   | 1.84   | 1.38   | 1.16   | 1.69   | 0.02   | 1.45   | 0.96   | -1.62  | 0.32   |
| 2.89   | 1.33   | 1.70   | 2.48   | -0.06  | 1.80   | 2.37   | 3.92   | 2.99   | -0.23  | 0.17   | 1.32   | 2.52   | 2.66   | -5.30  | -2.81  | -3.08  | -1.63  | -1.57  | -2.22  | -5.19  | -6.43  | -4.82  | -4.70  | -6.97  | -4.49  | -7.88  | -4.77  |
| -0.23  | -0.34  | -0.59  | -4.82  | 0.26   | 3.16   | 2.70   | 9.00   | -12.06 | -18.45 | -17.88 | 4.33   | 4.56   | 6.59   | -1.37  | -1.69  | -2.57  | -1.90  | -0.97  | -1.41  | -2.28  | -1.10  | -0.62  | -0.33  | -2.14  | -0.14  | -2.86  | -0.20  |
| 1.12   | 1.50   | 0.88   | 1.09   | 0.46   | 2.43   | 2.39   | 1.52   | 1.81   | 1.88   | 2.36   | 2.25   | 1.42   | 3.86   | 0.01   | -1.06  | -0.43  | 1.23   | 0.47   | -0.17  | 0.48   | 0.50   | 0.03   | -0.31  | 0.99   | -0.01  | -1.66  | 0.50   |
| 1.00   | 1.74   | 2.47   | 1.39   | 0.41   | 2.02   | 4.25   | 17.65  | 21.46  | 24.06  | 20.72  | 8.17   | 2.88   | 2.68   | -0.06  | -3.32  | -2.37  | -0.15  | -1.83  | -1.21  | -2.55  | -0.90  | -0.75  | -1.84  | -0.01  | -0.31  | -1.94  | 0.55   |
| 1.74   | 0.83   | 1.62   | 2.72   | 1.21   | 2.45   | 2.27   | 2.78   | 1.99   | 0.99   | 1.79   | 1.91   | 2.53   | 4.00   | 3.66   | 2.62   | 2.26   | 3.29   | 3.28   | 3.11   | 2.74   | 3.42   | 1.46   | 2.69   | 3.65   | 2.47   | 0.83   | 2.27   |
| 1.37   | 1.46   | -0.12  | 1.92   | 0.59   | 1.32   | 2.26   | 2.49   | 5.06   | 4.41   | 2.82   | 1.37   | 1.69   | 3.10   | 1.61   | 3.17   | 2.45   | 2.46   | 2.07   | 2.76   | 2.57   | 2.27   | 2.54   | 3.15   | 3.33   | 2.03   | 1.28   | 3.44   |
| 2.20   | 0.96   | 1.94   | 1.03   | 1.51   | 0.56   | 2.07   | 3.36   | 4.56   | 1.63   | 3.32   | 0.91   | 3.54   | 1.07   | 0.21   | 1.68   | 1.47   | 1.66   | 1.69   | 2.52   | 1.67   | 1.79   | -0.02  | 3.44   | 2.57   | 1.07   | -3.03  | 1.17   |
| -2.64  | -4.14  | -0.90  | -1.95  | -2.16  | -3.26  | -0.50  | 1.81   | 3.19   | 1.47   | 1.15   | 3.89   | 1.38   | 1.40   | -0.43  | 0.05   | 0.85   | 0.18   | 0.20   | 0.74   | 0.18   | -3.59  | -1.61  | -3.00  | -4.12  | -2.55  | -6.01  | -2.95  |
| -3.39  | -0.60  | 3.00   | -0.79  | -0.92  | -2.24  | -0.87  | -0.17  | 1.34   | -0.80  | 0.68   | 0.97   | -1.09  | -0.45  | -0.32  | 1.03   | 0.66   | 1.40   | 0.67   | 0.57   | 0.43   | -0.59  | -0.56  | -0.93  | -1.47  | -2.10  | -4.14  | -2.48  |
| 1.74   | 19.54  | 21.43  | 2.25   | 2.76   | 3.90   | 2.72   | 5.23   | 4.97   | 3.20   | 4.81   | 4.77   | 5.48   | 3.72   | 1.10   | 2.41   | 0.83   | 0.46   | 0.38   | 0.50   | 1.26   | 1.14   | -0.18  | 2.97   | 1.17   | 2.00   | -1.17  | 0.37   |
| -4.29  | -3.12  | -4.99  | 0.19   | -4.30  | -2.51  | -3.07  | -1.80  | 0.19   | -0.45  | -1.15  | -0.51  | -1.79  | -2.23  | 5.42   | 7.33   | 5.14   | 4.42   | 6.04   | 6.34   | 6.54   | 12.87  | 11.11  | 10.81  | 11.52  | 9.12   | 7.68   | 10.05  |
| 4.91   | 3.32   | 2.98   | 6.61   | 3.53   | 6.73   | 3.61   | 4.77   | 3.14   | 2.94   | 4.12   | 4.51   | 2.65   | 4.06   | -0.34  | -1.60  | -0.13  | -0.65  | -0.41  | -0.20  | -0.16  | -2.83  | -2.55  | -1.61  | -3.65  | -2.13  | -4.83  | -1.77  |
| -0.36  | -0.75  | -2.98  | 2.55   | -0.36  | 1.08   | 0.84   | 3.41   | 3.55   | 1.45   | 1.10   | 0.78   | 3.37   | 2.04   | 0.30   | -0.53  | 0.02   | 1.62   | -0.79  | 0.89   | -0.57  | -1.32  | -0.91  | -0.59  | -3.01  | -2.52  | -4.54  | -2.64  |
| 11.03  | 2.46   | 4.45   | 8.14   | 10.32  | 3.84   | 17.50  | 14.67  | 20.53  | 17.25  | 22.04  | 22.68  | 16.04  | 19.64  | 0.34   | 0.82   | 0.68   | 1.86   | 2.94   | 1.01   | -1.09  | 1.19   | 0.55   | -0.16  | -3.73  | -3.54  | -2.50  | -5.89  |
| 5.97   | -4.66  | -11.98 | 2.41   | 6.66   | -5.96  | 18.40  | 15.37  | 18.54  | 17.52  | 19.44  | 22.09  | 17.18  | 19.60  | -1.86  | -0.85  | 1.45   | 2.88   | -0.09  | 1.30   | -1.73  | 1.35   | 0.60   | 1.42   | -7.41  | -2.28  | -1.16  | -7.89  |
| -56.53 | -63.84 | -65.06 | -52.29 | -50.83 | -65.70 | -40.31 | -33.90 | -44.90 | -40.03 | -41.62 | -34.91 | -37.10 | -45.57 | -0.21  | -1.74  | 1.77   | -0.88  | 0.23   | -1.03  | 1.26   | -0.42  | 1.07   | -0.49  | -2.70  | -3.61  | -2.20  | -7.07  |
| -18.72 | -20.08 | -18.04 | -16.46 | -17.17 | -23.50 | -16.99 | -17.33 | -14.60 | -16.53 | -21.63 | -8.45  | -19.13 | -15.32 | -2.52  | -2.91  | -0.84  | -1.91  | -2.31  | -1.68  | -1.68  | -3.68  | -1.55  | -1.69  | -2.61  | -0.53  | -2.97  | -1.97  |
| -31.57 | -31.71 | -32.68 | -26.80 | -27.29 | -35.81 | -25.68 | -26.90 | -23.77 | -25.68 | -33.91 | -17.21 | -29.83 | -26.19 | -2.27  | 0.79   | -1.21  | -3.38  | -1.65  | -0.86  | 0.06   | 0.61   | -0.42  | 0.76   | 0.31   | 1.20   | 0.02   | -0.03  |
| -6.47  | -7.19  | -12.34 | -5.16  | -3.74  | -11.94 | -2.42  | 2.86   | -1.28  | -2.64  | -4.08  | -0.83  | -1.97  | -1.44  | -0.66  | 0.11   | 0.20   | 0.79   | -1.02  | 2.03   | 1.79   | 2.19   | 1.97   | 2.99   | -2.38  | -1.23  | -0.37  | -3.73  |
| -24.86 | -8.50  | -24.80 | -27.04 | -27.12 | -28.35 | -2.23  | -22.65 | -28.21 | -23.21 | -27.43 | -26.22 | -26.19 | -30.09 | -15.61 | -19.38 | -17.11 | -18.59 | -17.48 | -16.21 | -15.51 | -26.48 | -22.15 | -26.18 | -25.86 | -12.09 | -25.03 | -21.26 |
| 2.09   | 2.14   | 2.17   | 2.26   | 3.21   | 3.18   | 2.85   | 3.42   | 3.14   | 2.93   | 2.81   | 2.49   | 3.32   | 4.30   | 1.40   | 2.61   | 1.23   | 2.29   | 0.51   | 1.87   | 1.63   | 4.60   | 1.59   | 0.99   | 2.03   | 2.01   | 1.61   | 0.64   |
| 6.08   | 3.76   | 4.16   | 6.27   | 3.67   | 7.13   | 2.20   | 6.17   | 7.36   | 3.43   | 4.51   | 6.41   | 4.37   | 8.16   | -0.31  | 2.26   | -0.92  | 1.77   | 1.36   | 1.05   | 3.95   | 5.00   | 1.90   | 4.46   | 3.83   | 2.22   | 1.88   | 2.79   |
| -1.09  | -1.22  | 0.13   | 1.19   | -0.67  | 0.57   | 0.09   | 0.72   | 3.52   | 0.25   | 1.14   | 3.45   | 0.48   | 2.11   | -4.11  | -0.42  | 0.77   | 0.99   | 0.06   | 0.46   | 0.53   | -1.71  | -1.97  | 0.02   | -1.07  | -1.02  | -2.60  | -2.30  |
| 0.56   | -0.94  | -1.77  | 0.94   | 0.46   | 0.08   | 0.37   | -0.94  | 1.67   | 0.65   | 1.99   | 1.86   | 0.22   | -0.32  | -2.91  | 0.06   | -0.79  | -0.57  | 0.10   | -0.11  | -0.08  | -1.80  | -1.57  | -0.67  | -1.93  | -1.66  | -3.91  | -2.81  |
| -0.51  | 0.25   | 0.50   | 2.17   | 0.76   | 1.90   | 1.37   | 4.86   | 4.07   | 3.64   | 4.19   | 2.99   | 0.99   | 2.46   | -2.15  | -0.48  | -1.14  | 0.34   | -0.10  | -0.62  | -0.49  | -0.71  | -1.39  | -1.23  | -0.86  | -1.50  | -1.69  | -0.85  |
| 0.32   | 10.00  | 23.83  | 4.10   | -1.78  | 0.91   | -13.22 | 4.65   | 1.09   | -3.68  | 4.68   | 0.23   | -7.14  | -5.42  | -0.88  | -2.36  | -1.09  | -1.38  | -2.10  | 0.76   | 2.40   | -0.94  | -1.39  | -2.21  | -4.66  | -5.07  | -4.02  | -12.98 |
| 5.08   | 6.50   | 25.21  | 12.39  | 2.34   | 7.27   | -17.22 | 4.60   | 2.29   | -3.20  | 5.02   | -0.46  | -9.52  | -4.97  | -0.06  | 2.26   | -0.99  | 2.20   | -2.27  | -0.80  | 3.55   | 0.47   | -1.17  | -4.38  | -3.41  | -5.29  | -2.76  | -13.01 |
| 12.45  | 6.19   | 26.74  | 24.36  | 9.07   | 17.13  | -27.41 | 3.97   | 1.52   | -3.68  | 5.74   | -2.48  | -14.58 | -7.91  | 1.28   | 2.65   | 0.67   | 3.10   | -2.32  | 3.07   | 5.77   | 1.19   | -0.10  | -4.26  | -5.88  | -6.99  | -3.22  | -16.19 |
| -2.57  | -6.30  | -8.48  | -6.07  | -3.85  | -5.68  | 6.17   | 9.36   | 10.01  | 9.12   | 7.68   | 9.93   | 7.94   | 8.63   | -5.77  | -3.37  | -3.44  | -2.37  | -5.66  | -3.43  | -8.11  | -4.98  | -4.39  | -4.55  | -8.90  | -7.05  | -5.06  | -8.51  |
| -4.57  | -9.18  | -12.02 | -9.25  | -6.22  | -7.82  | 5.90   | 9.99   | 10.11  | 10.10  | 9.57   | 11.86  | 7.84   | 7.74   | -8.20  | -5.01  | -5.85  | -2.03  | -6.38  | -4.86  | -8.92  | -3.74  | -3.55  | -4.02  | -11.50 | -7.92  | -5.25  | -11.08 |
| -20.14 | -18.94 | -18.98 | -13.43 | -16.42 | -20.77 | -21.05 | -21.01 | -19.68 | -16.65 | -18.67 | -18.54 | -19.72 | -21.17 | 11.12  | 13.08  | 12.85  | 11.53  | 14.81  | 12.91  | 11.71  | 9.70   | 8.07   | 9.17   | 7.83   | 6.17   | 9.59   | 8.45   |
| 1.05   | 0.89   | 2.07   | 3.06   | 2.27   | 4.14   | 6.52   | 6.44   | 6.72   | 8.50   | 8.60   | 6.90   | 7.16   | 9.40   | -2.52  | 0.06   | 0.13   | 0.08   | 0.80   | 0.54   | 0.14   | -5.23  | -2.28  | -3.12  | -4.92  | -3.10  | -4.00  | -3.10  |
| 61.01  | 61.38  | 62.31  | 58.79  | 56.20  | 66.93  | 61.69  | 60.64  | 65.48  | 62.09  | 60.50  | 47.65  | 59.30  | 67.87  | 3.34   | 1.46   | -0.71  | 4.87   | 1.90   | 3.40   | 3.84   | -3.39  | -0.82  | -6.59  | -11.38 | -6.71  | -6.11  | -14.84 |
| -0.79  | -2.09  | 2.47   | -3.52  | -0.94  | -4.39  | 4.09   | -0.62  | -1.98  | -0.99  | -2.78  | -1.63  | 1.25   | -0.44  | 0.28   | 0.61   | 2.27   | 3.93   | 1.94   | 3.43   | -0.16  | 5.74   | 5.57   | 4.11   | -4.30  | -0.86  | 2.68   | -5.09  |
| -5.88  | -4.92  | -8.14  | -2.14  | -4.98  | -6.62  | -4.26  | -3.33  | -7.55  | -3.88  | -6.38  | -3.30  | -3.93  | -5.62  | 3.67   | 2.78   | 3.46   | 2.24   | 3.52   | 1.94   | 5.32   | 4.98   | 1.71   | 2.27   | 2.85   | 4.52   | 5.04   | 6.82   |
| -7.13  | -5.32  | -9.46  | -4.42  | -6.86  | -7.76  | -7.34  | -4.56  | -6.85  | -3.69  | -7.01  | -3.66  | -5.50  | -5.54  | 3.63   | 1.10   | 3.51   | 2.54   | 4.18   | 2.40   | 2.14   | 5.16   | 2.15   | 2.65   | 2.93   | 4.74   | 2.46   | 5.19   |
| -2.45  | -3.20  | -4.62  | -0.48  | -0.90  | -3.85  | -1.60  | 2.41   | -0.66  | -1.39  | -2.08  | 6.92   | -0.78  | -2.40  | 2.30   | -0.17  | -0.16  | 0.83   | 0.91   | 1.25   | 1.22   | 0.72   | 0.60   | -0.26  | 2.14   | 3.18   | 5.09   | 4.88   |
| 8.68   | 8.41   | 10.12  | 6.87   | 5.14   | 6.75   | 5.33   | 3.66   | 6.14   | 12.10  | 11.22  | 6.73   | 8.09   | 12.01  | -4.13  | -4.46  | -2.38  | -3.29  | -3.74  | -3.82  | -3.40  | -10.83 | -9.29  | -10.14 | -11.96 | -10.30 | -12.50 | -12.85 |
| 16.44  | 24.39  | 26.04  | 17.96  | 14.43  | 17.78  | 13.57  | 6.82   | 10.48  | 20.91  | 21.34  | 9.36   | 15.34  | 21.37  | -9.21  | -9.77  | -8.24  | -5.84  | -8.35  | -7.93  | -21.90 | -19.90 | -19.15 | -23.03 | -19.44 | -24.61 | -24.44 |        |
| -10.71 | -18.48 | -20.97 | -11.56 | -13.21 | -16.09 | -2.09  | 0.50   | -0.55  | 2.40   | 1.03   | 3.01   | -0.82  | -4.37  | 4.42   | 0.62   | 2.36   | 2.25   | 3.10   | 2.49   | 1.66   | 7.85   | 5.74   | 6.45   | 10.00  | 6.38   | 8.52   | 10.45  |
| 0.70   | 0.86   | 1.02   | 1.06   | 1.37   | 0.74   | 1.73   | 2.45   | 2.12   | 1.34   | 2.06   | 4.02   | 0.96   | 1.99   | -1.62  | -0.28  | -1.15  | 1.03   | 0.70   | 0.06   | 0.05   | -0.69  | 0.40   | 2.21   | -0.34  | -0.11  | 0.70   | -0.43  |
| 0.87   | -0.07  | 1.32   | 1.50   | -0.89  | 0.44   | 0.85   | 1.58   | 5.25   | 4.47   | 2.37   | 5.57   | 1.34   | 2.41   | -4.62  | 0.13   | 0.70   | -0.68  | -0.23  | 0.20   | -0.43  | -0.57  | 4.57   | 2.37   | -0.86  | 1.40   | 0.73   | 0.03   |
| -0.63  | 0.71   | 0.54   | 0.66   | 0.66   | -0.10  | 1.39   | 0.53   | 7.65   | 4.32   | 1.68   | 3.33   | 1.89   | 1.13   | -1.44  | -0.78  | -0.56  | -0.52  | 1.62   | 0.88   | 0.46   | -1.80  | 6.09   | 2.76   | 1.12   | 0.10   | -0.98  |        |
| 1.25   | -9.14  | -8.53  | -1.65  | -0.40  | -3.84  | 13.68  | 20.88  | 19.51  | 17.59  | 17.19  | 19.34  | 14.83  | 16.43  | -8.58  | -8.10  | -7.34  | -6.99  | -7.82  | -5.78  | -7.74  | -4.49  | -4.58  | -3.48  | -7.85  | -2.50  | -7.77  | -7.94  |
| -0.02  | -10.88 | -10.65 | -4.12  | -0.99  | -4.56  | 15.31  | 18.12  | 18.99  | 17.31  | 17.17  | 19.76  | 14.10  | 16.80  | -12.29 | -11.16 | -10.43 | -8.75  | -11.07 | -10.42 | -10.90 | -6.35  | -6.61  | -5.36  | -11.15 | -4.18  | -8.21  | -11.22 |
| -7.52  | -6.46  | -7.72  | -6.83  | -5.74  | -11.0  |        |        |        |        |        |        |        |        |        |        |        |        |        |        |        |        |        |        |        |        |        |        |



|        |        |        |        |        |        |        |        |        |        |        |        |        |        |        |        |        |        |        |        |        |        |        |        |        |        |        |        |
|--------|--------|--------|--------|--------|--------|--------|--------|--------|--------|--------|--------|--------|--------|--------|--------|--------|--------|--------|--------|--------|--------|--------|--------|--------|--------|--------|--------|
| -0.11  | -0.54  | -0.15  | -4.70  | 0.99   | 1.82   | 2.51   | -9.31  | -11.99 | -17.94 | -18.59 | 3.90   | 4.52   | 6.05   | -1.57  | -1.54  | -2.68  | -2.05  | -2.19  | -1.55  | -2.24  | -1.45  | -0.52  | -1.97  | -1.23  | -0.96  | -2.73  | -1.10  |
| 0.90   | 2.08   | 1.00   | 0.45   | 0.25   | 2.33   | 1.77   | 2.75   | 2.80   | 1.78   | 1.75   | 2.91   | 1.75   | 3.85   | 0.37   | -0.37  | -0.09  | 1.41   | 0.56   | 0.03   | 0.30   | -0.20  | 0.31   | 0.34   | 0.82   | 0.68   | -1.58  | 0.84   |
| 1.89   | 1.37   | 2.09   | 0.66   | -0.25  | 1.79   | 4.86   | 18.28  | 22.00  | 24.66  | 20.22  | 7.29   | 3.06   | 3.38   | -0.20  | -3.91  | -2.44  | -2.32  | -2.17  | -0.81  | -2.65  | -0.78  | -1.82  | -0.93  | 0.08   | -0.54  | -1.56  | 0.26   |
| 2.49   | 1.44   | 1.04   | 2.42   | 1.55   | 1.87   | 2.70   | 3.21   | 2.52   | 1.66   | 3.74   | 6.27   | 1.57   | 3.20   | 2.48   | 1.88   | 2.99   | 3.16   | 2.74   | 3.89   | 3.55   | 3.20   | 1.68   | 3.24   | 1.98   | 2.69   | 1.92   | 3.30   |
| 1.92   | 1.28   | 1.09   | 2.65   | 1.63   | 0.65   | 2.19   | 2.68   | 5.49   | 3.30   | 3.03   | 1.89   | 3.21   | 4.07   | 1.88   | 3.24   | 2.07   | 2.42   | 2.64   | 2.79   | 2.53   | 2.63   | 2.99   | 3.62   | 3.20   | 2.00   | 1.34   | 3.16   |
| 2.54   | -0.24  | 1.32   | 1.47   | 2.53   | 0.87   | 1.84   | 3.12   | 4.78   | 3.12   | 2.98   | 1.14   | 2.98   | 1.08   | 1.57   | 1.37   | 2.08   | 2.66   | 2.24   | 2.29   | 3.68   | 1.26   | 0.83   | 2.73   | 1.67   | 0.10   | -2.76  | 1.77   |
| -1.54  | -3.32  | 0.31   | -2.86  | -1.73  | -2.46  | 0.42   | 2.44   | 4.21   | 1.86   | 2.60   | 5.47   | 1.79   | 1.74   | -0.12  | 0.23   | 0.92   | 0.62   | 0.27   | 0.65   | -0.16  | -3.61  | -2.41  | -0.33  | -4.33  | -2.70  | -6.52  | -4.69  |
| -2.66  | 0.53   | 6.16   | -0.18  | -0.91  | -1.74  | 0.07   | -1.10  | 1.77   | 0.79   | 1.14   | 1.72   | 0.60   | 0.39   | -0.10  | 1.22   | 0.61   | 0.93   | 0.86   | 0.45   | 0.58   | -0.62  | 0.03   | -1.40  | -1.76  | -1.88  | -3.29  | -1.53  |
| 2.46   | 22.14  | 27.49  | 3.39   | 2.71   | 3.80   | 2.37   | 4.53   | 5.43   | 3.52   | 5.06   | 3.72   | 3.37   | 4.39   | 0.42   | 1.19   | 1.00   | 0.40   | 1.08   | 0.68   | 2.00   | 0.43   | -0.45  | -1.48  | 0.59   | 0.31   | -1.37  | 1.02   |
| -2.26  | -2.28  | -3.06  | 0.41   | -2.62  | -1.13  | -1.51  | -1.31  | 0.19   | 0.30   | -1.08  | 0.61   | -1.20  | -1.06  | 5.72   | 7.23   | 4.47   | 5.68   | 6.35   | 7.25   | 6.64   | 13.65  | 11.89  | 13.44  | 10.99  | 8.30   | 6.79   | 11.23  |
| 4.92   | 2.29   | 3.17   | 6.84   | 2.30   | 6.75   | 1.34   | 3.79   | 4.54   | 2.91   | 3.60   | 4.26   | 3.73   | 4.21   | 0.38   | -1.42  | -0.24  | -0.23  | -0.71  | -0.61  | -0.47  | -3.11  | -2.16  | -2.35  | -4.39  | -1.87  | -4.68  | -2.01  |
| 0.20   | -0.74  | -3.99  | 2.43   | -0.12  | -0.02  | 2.79   | 3.36   | 3.87   | 0.71   | 2.05   | 1.30   | 1.31   | 3.71   | 0.17   | -0.81  | 0.03   | -0.72  | 0.88   | 0.79   | 0.15   | -1.06  | -1.71  | -0.70  | -1.92  | -2.91  | -4.39  | -2.70  |
| 9.16   | 1.02   | 1.39   | 5.92   | 5.91   | 1.50   | 16.20  | 13.09  | 18.85  | 14.89  | 17.54  | 20.08  | 14.50  | 17.82  | 0.57   | 0.17   | 1.23   | 2.28   | 1.98   | 0.50   | -1.63  | 1.60   | 0.85   | 5.00   | -4.00  | -3.17  | -2.57  | -6.90  |
| 5.11   | -6.50  | -12.89 | 0.26   | 4.30   | -7.54  | 16.26  | 13.54  | 16.58  | 15.63  | 16.84  | 19.59  | 14.72  | 17.42  | -1.68  | -0.66  | 1.40   | 2.57   | 0.76   | 1.27   | -2.01  | 1.53   | 0.65   | 1.73   | -8.40  | -2.37  | -0.97  | -7.99  |
| -54.15 | -59.56 | -59.65 | -48.86 | -45.97 | -62.93 | -37.68 | -31.55 | -40.77 | -37.52 | -41.36 | -31.79 | -34.21 | -44.19 | 1.08   | 0.72   | 1.29   | -0.54  | 1.21   | 0.63   | 1.08   | 0.19   | 1.89   | -2.00  | -1.83  | -2.44  | -0.69  | -7.83  |
| -18.50 | -17.43 | -15.61 | -15.76 | -16.14 | -21.87 | -14.71 | -16.33 | -13.86 | -15.83 | -19.50 | -6.30  | -18.67 | -15.30 | -2.36  | -0.95  | -1.06  | -1.98  | -1.59  | -1.28  | -1.11  | -2.86  | -1.29  | -0.55  | -2.67  | -0.86  | -1.86  | -1.72  |
| -29.86 | -29.79 | -29.72 | -24.34 | -25.43 | -34.21 | -25.41 | -24.94 | -22.90 | -24.82 | -32.23 | -16.63 | -28.71 | -24.86 | -1.82  | -1.26  | -0.94  | -2.23  | -0.81  | 0.18   | 1.10   | 1.44   | 0.81   | 1.10   | 1.90   | 1.84   | 0.67   | 0.51   |
| -6.51  | -9.60  | -14.59 | -5.94  | -2.47  | -13.20 | -0.94  | 2.69   | -2.74  | -2.77  | -4.34  | 0.77   | -2.81  | -2.66  | 0.36   | -0.10  | 0.83   | -0.42  | -0.24  | 3.29   | 2.19   | 2.32   | 0.93   | 3.30   | -3.73  | 0.13   | -0.42  | -2.83  |
| -26.75 | -26.15 | -26.14 | -28.53 | -29.28 | -30.11 | -22.71 | -23.86 | -29.98 | -24.64 | -28.25 | -28.21 | -28.43 | -31.54 | -16.20 | -21.90 | -18.84 | -19.61 | -19.30 | -17.27 | -17.18 | -28.76 | -23.87 | -27.83 | -28.19 | -20.89 | -25.90 | -21.54 |
| 2.23   | 2.79   | 2.31   | 2.56   | 2.90   | 2.65   | 2.96   | 4.36   | 3.94   | 4.39   | 2.59   | 3.30   | 3.63   | 4.21   | 1.14   | 3.33   | 1.43   | 2.16   | 1.30   | 1.46   | 1.63   | 2.86   | 1.68   | 1.26   | 2.39   | 2.08   | 2.79   | 0.56   |
| 5.70   | 4.59   | 4.57   | 5.67   | 4.72   | 7.92   | 3.21   | 7.15   | 7.62   | 5.56   | 4.90   | 7.07   | 4.03   | 7.85   | 1.67   | 4.07   | 0.85   | 2.14   | 1.27   | 1.39   | 4.30   | 5.39   | 1.08   | 4.36   | 4.37   | 2.57   | 3.32   | 3.19   |
| -1.22  | -1.58  | -1.06  | 0.48   | -1.48  | -0.57  | 0.69   | 0.88   | 0.69   | 1.19   | 2.14   | 3.76   | 0.53   | 1.94   | -2.66  | 0.02   | -0.74  | 0.27   | -0.13  | -0.17  | 0.21   | -1.40  | -0.45  | 0.45   | -1.27  | -0.55  | -3.51  | -1.74  |
| -0.11  | -0.74  | -0.63  | 1.36   | 0.64   | 0.55   | 0.57   | -1.19  | 2.55   | -0.29  | 2.69   | 1.74   | 0.66   | 0.66   | -3.42  | -0.14  | -0.45  | -0.91  | 0.27   | 0.34   | -0.05  | -1.81  | -2.14  | -1.28  | -2.15  | -1.84  | -4.19  | -2.63  |
| 0.60   | 0.04   | 0.92   | 1.02   | 0.39   | 1.36   | 2.27   | 5.23   | 4.84   | 4.37   | 3.61   | 4.22   | 0.92   | 2.14   | -1.19  | -0.07  | -0.44  | -0.14  | -0.54  | -0.17  | -0.20  | -1.54  | -0.80  | -1.17  | -0.76  | -1.87  | -1.32  | 0.49   |
| -0.72  | 10.09  | 28.11  | 4.32   | -1.24  | 1.12   | -13.30 | 4.17   | 0.96   | -3.90  | 5.20   | -0.01  | -5.21  | -4.00  | -0.73  | 2.89   | -1.43  | -1.17  | -2.31  | -0.17  | 3.34   | -0.01  | 1.10   | -3.29  | -4.79  | -5.78  | -5.04  | -13.35 |
| -0.72  | 7.13   | 30.33  | 12.87  | 3.23   | 8.26   | -17.57 | 4.30   | 2.38   | -3.46  | 6.09   | -0.25  | -8.63  | -5.41  | 0.47   | 3.49   | -0.99  | 2.27   | -1.95  | -0.69  | 4.20   | 0.99   | 0.22   | -3.81  | -3.30  | -5.43  | -5.66  | -12.94 |
| 8.88   | 7.89   | 32.12  | 24.83  | 9.41   | 16.98  | -28.18 | 3.07   | 0.22   | -3.91  | 5.77   | -3.69  | -14.10 | -7.77  | 2.02   | 3.55   | -1.23  | 4.48   | -1.68  | 1.88   | 5.40   | 1.65   | 0.71   | -6.18  | 0.04   | -7.27  | 0.25   | -16.51 |
| -3.20  | -7.72  | -10.61 | -6.72  | -4.52  | -5.99  | 3.89   | 7.81   | 8.04   | 8.48   | 7.54   | 9.88   | 7.62   | 6.00   | -6.40  | -5.70  | -4.12  | -2.85  | -5.88  | -3.79  | -8.02  | -4.14  | -3.07  | -2.91  | -9.13  | -7.02  | -3.88  | -8.16  |
| -5.09  | -10.85 | -15.34 | -10.19 | -7.30  | -8.79  | 4.59   | 8.22   | 8.93   | 9.95   | 9.06   | 10.43  | 6.67   | 6.25   | 8.71   | -4.86  | -5.54  | -2.27  | -6.23  | -5.36  | -8.72  | -3.72  | -3.81  | -5.34  | -11.35 | -8.21  | -6.85  | -10.92 |
| -16.39 | -18.50 | -22.38 | -19.94 | -12.71 | -17.89 | -15.79 | -15.18 | -15.76 | -13.11 | -14.41 | -16.40 | -14.85 | -17.49 | -8.56  | 14.51  | 14.01  | 11.59  | 15.82  | 12.27  | 11.71  | 10.28  | 9.75   | 9.17   | 8.91   | 6.93   | 10.92  | 9.19   |
| 0.19   | 1.24   | 2.94   | 3.52   | 2.08   | 5.88   | 6.51   | 6.63   | 6.56   | 8.82   | 8.16   | 5.86   | 6.83   | 8.69   | -2.63  | -0.12  | -0.60  | -0.19  | 0.23   | -0.08  | -0.12  | -5.29  | -2.59  | -3.73  | -6.16  | -3.14  | -5.26  | -3.40  |
| 59.59  | 58.54  | 61.03  | 55.39  | 53.06  | 64.73  | 59.83  | 56.12  | 62.96  | 59.48  | 60.26  | 47.48  | 56.02  | 65.87  | 2.22   | 0.94   | -1.41  | 4.20   | 1.54   | 2.88   | 2.29   | -4.88  | -2.16  | -7.46  | -13.23 | -7.88  | -7.43  | -13.03 |
| -1.29  | -1.56  | 1.28   | -3.83  | -2.20  | -3.10  | 3.45   | -0.27  | -0.68  | -1.14  | -1.84  | -0.36  | -1.10  | 0.38   | 0.13   | -0.28  | 3.42   | 3.27   | 1.40   | 1.85   | -0.11  | 3.90   | 5.03   | 3.86   | -4.59  | -1.74  | 1.89   | -2.81  |
| -5.22  | -3.94  | -8.15  | -1.63  | -3.95  | -5.47  | -4.08  | -2.83  | -6.07  | -2.82  | -6.06  | -3.72  | -4.17  | -5.44  | 4.20   | 3.44   | 3.57   | 3.15   | 4.22   | 2.79   | 5.97   | 5.29   | 2.31   | 3.08   | 2.86   | 5.02   | 3.39   | 7.26   |
| -6.19  | -3.99  | -8.72  | -3.66  | -5.76  | -6.80  | -5.31  | -3.78  | -6.50  | -3.59  | -6.46  | -2.72  | -4.17  | -5.45  | -4.79  | 4.19   | 1.21   | 3.69   | 2.88   | 4.81   | 2.30   | 1.72   | 5.64   | 2.57   | 2.91   | 3.01   | 4.72   | 3.57   |
| -1.93  | -0.82  | -6.03  | -0.41  | -3.68  | -2.51  | -2.03  | 3.96   | -0.23  | 0.95   | 0.09   | 7.84   | -0.75  | -1.71  | 3.41   | 0.64   | 0.01   | 1.70   | 1.03   | 1.57   | 1.16   | 2.65   | 0.86   | -0.55  | 1.06   | 3.10   | 1.24   | 4.32   |
| 8.70   | 7.43   | 10.35  | 6.54   | 5.02   | 6.26   | 5.71   | 3.73   | 6.93   | 11.77  | 11.42  | 6.66   | 7.98   | 12.05  | -5.12  | -4.66  | -2.88  | -3.12  | -4.53  | -4.28  | -3.97  | -12.13 | -10.39 | -9.99  | -13.21 | -10.62 | -13.61 | -14.35 |
| 16.06  | 22.61  | 23.85  | 17.39  | 13.51  | 17.20  | 13.16  | 6.34   | 10.74  | 20.84  | 21.08  | 9.22   | 15.14  | 21.68  | -9.99  | -10.26 | -9.08  | -6.68  | -9.10  | -9.07  | -9.12  | -24.37 | -21.89 | -21.06 | -25.52 | -20.82 | -26.84 | -26.72 |
| -0.60  | -18.18 | -19.54 | -11.55 | -13.87 | -16.34 | -2.14  | 1.23   | -0.35  | 1.97   | 2.00   | 4.43   | -0.51  | -4.50  | 5.26   | 1.78   | 1.65   | 2.68   | 2.17   | 2.36   | 2.51   | 9.53   | 5.04   | 6.71   | 10.33  | 6.79   | 10.01  | 10.73  |
| 0.81   | 1.12   | 0.88   | 0.26   | 1.39   | 0.17   | 2.39   | 2.10   | 2.55   | 2.04   | 2.36   | 4.26   | 1.28   | 2.65   | -3.14  | 0.47   | -1.31  | 0.92   | 0.34   | 0.40   | -0.20  | -1.23  | -3.68  | 1.48   | -0.14  | 0.99   | 0.69   | 0.39   |
| 1.32   | 0.12   | 1.70   | 1.82   | -0.17  | -0.24  | 1.80   | 1.79   | 6.11   | 3.86   | 3.01   | 4.72   | 1.51   | 2.92   | -3.50  | 0.19   | 0.49   | -0.11  | -0.08  | -0.09  | -0.08  | 0.42   | 2.99   | 3.38   | -0.16  | 3.20   | 0.77   | 0.58   |
| -0.80  | 1.37   | 0.49   | 1.22   | 0.77   | -0.37  | 1.91   | 1.02   | 7.80   | 5.20   | 2.10   | 4.48   | 2.24   | 1.33   | -1.23  | 0.99   | -0.30  | -0.17  | 1.60   | 1.87   | 0.19   | 1.63   | 1.17   | 4.97   | 1.57   | 4.32   | 0.97   | 0.51   |
| -0.34  | -10.37 | -11.95 | -5.15  | -3.24  | -6.21  | 10.64  | 17.61  | 15.93  | 15.75  | 14.89  | 15.99  | 12.54  | 12.77  | -8.66  | -8.54  | -7.93  | -7.34  | -8.53  | -6.59  | -7.90  | -4.54  | -4.70  | -3.32  | -8.68  | -2.12  | -9.58  | -8.31  |
| -2.23  | -13.21 | -13.12 | -5.60  | -3.56  | -7.69  | 11.33  | 13.34  | 16.50  | 15.31  | 14.32  | 17.61  | 11.92  | 14.14  | -13.15 | -11.90 | -11.12 | -10.06 | -12.45 | -10.12 | -11.06 | -6.57  | -6.87  | -5.16  | -11.54 | -4.73  | -8.18  | -11.20 |
| -5.99  | -5.38  | -6.27  | -6.21  | -4.54  | -10.25 | -6.36  | -6.57  | -6.14  | -3.81  | -4.89  | -4.42  | -5.10  | -6.79  | 11.21  | 10.34  | 8.67   | 9.32   | 10.64  | 8.20   | 8.19   | 6.19   | 6.92   | 8.74   | 5.28   | 5.60   | 5.45   | 6.21   |
| -1.03  | -0.78  | -3.00  | -1.77  | -1.42  | -6.46  | 0.46   | 0.76   | 3.01   | 4.60   | 4.12   | 5.49   | 1.46   | 1.59   | -0.81  | -0.63  | -1.28  | -0.07  | -0.38  | 0.33   | -0.74  | -2.61  | -2.93  | -2.14  | -3.81  | -4.65  | -4.10  | -3.29  |
| -2.84  | -4.08  | -3.77  | -0.14  | -1.34  | -4.57  | -0.02  | -0.47  | 1.23   | 1.94   | -0.08  | 2.90   | 0.08   | 0.95   | -0.26  | 0.22   | 1.24   | -0.64  | -0.30  | 0.67   | 0.62   | -1.35  | -0.09  | -1.20  | -1.10  | -0.99  | -1.79  | -0.83  |
| 0.91   | -0.68  | 3.01   | 3.06   |        |        |        |        |        |        |        |        |        |        |        |        |        |        |        |        |        |        |        |        |        |        |        |        |

|        |        |        |        |        |        |        |        |        |        |        |        |        |        |        |        |        |        |        |        |        |        |        |        |        |        |        |        |       |
|--------|--------|--------|--------|--------|--------|--------|--------|--------|--------|--------|--------|--------|--------|--------|--------|--------|--------|--------|--------|--------|--------|--------|--------|--------|--------|--------|--------|-------|
| 1.80   | 1.88   | 1.48   | 1.93   | 0.93   | 1.48   | 2.94   | 4.24   | 2.43   | 3.22   | 3.59   | 2.16   | 2.79   | 4.02   | 3.05   | 2.73   | 3.02   | 3.21   | 2.68   | 3.72   | 3.71   | 3.58   | 1.92   | 3.38   | 2.93   | 2.49   | 1.67   | 3.00   |       |
| 1.51   | 0.64   | 0.32   | 2.37   | 1.23   | 0.69   | 2.32   | 2.18   | 5.55   | 3.36   | 2.91   | 1.59   | 2.38   | 2.93   | 1.75   | 2.93   | 2.28   | 2.37   | 2.42   | 2.42   | 2.94   | 3.00   | 2.93   | 3.42   | 3.64   | 2.43   | 1.36   | 3.92   |       |
| 0.93   | -0.62  | 0.34   | 0.43   | -1.03  | 0.27   | 2.57   | 3.09   | 4.82   | 2.70   | 3.46   | 0.58   | 2.88   | 2.11   | 2.39   | 1.40   | 1.61   | 2.21   | 2.08   | 2.50   | 2.08   | 1.81   | -0.25  | 2.99   | 0.58   | 0.90   | -0.94  | 1.52   |       |
| -3.03  | -4.31  | -2.94  | -3.99  | -3.83  | -0.15  | 1.03   | 1.73   | 4.79   | 1.76   | 2.03   | 5.61   | 1.81   | 2.32   | -0.44  | -0.32  | 0.70   | -0.36  | 0.04   | 0.67   | 0.27   | -0.21  | -1.59  | -1.21  | -3.68  | -3.32  | -5.52  | -4.88  |       |
| -3.29  | -2.25  | 2.77   | -0.90  | -1.30  | -2.89  | 0.99   | 1.10   | 2.30   | 0.88   | 1.89   | 2.16   | 0.97   | 0.48   | -0.09  | 0.89   | 0.65   | 1.01   | 0.15   | 0.39   | 0.21   | -1.59  | -0.74  | 0.11   | -2.43  | -1.55  | -4.48  | -2.00  |       |
| 1.30   | 20.20  | 24.42  | 3.07   | 2.21   | 3.44   | 2.74   | 5.15   | 3.94   | 1.99   | 4.63   | 3.18   | 3.37   | 3.96   | -0.49  | 1.77   | 1.01   | 0.78   | -0.12  | 1.02   | 2.26   | 1.86   | 0.05   | 0.96   | 1.71   | 1.32   | -0.06  | -0.11  |       |
| -2.55  | -3.26  | -3.77  | 0.14   | -2.69  | -1.17  | 0.20   | 1.56   | 2.00   | 1.27   | 0.77   | 1.58   | -0.64  | 0.28   | 5.52   | 7.13   | 4.71   | 5.33   | 8.27   | 7.89   | 6.37   | 13.95  | 11.95  | 13.50  | 12.31  | 8.87   | 7.97   | 11.54  |       |
| 3.96   | 1.17   | 2.42   | 5.35   | 2.33   | 5.66   | 3.39   | 3.85   | 3.26   | 3.01   | 3.23   | 3.38   | 3.10   | 3.49   | -0.12  | -1.88  | -0.22  | -0.94  | -1.13  | -0.93  | -0.01  | -3.11  | -2.26  | -1.93  | -4.18  | -2.11  | -4.75  | -1.97  |       |
| -0.62  | -1.69  | -4.96  | 0.88   | -0.67  | -0.58  | 1.78   | 3.70   | 3.53   | -0.09  | 1.43   | 0.49   | 2.51   | 1.52   | 0.45   | -0.02  | -0.47  | 0.59   | -1.38  | 0.61   | -1.42  | -1.74  | -1.14  | -1.05  | -2.12  | -2.51  | -4.94  | -3.08  |       |
| 5.98   | -1.90  | -1.35  | 2.86   | 2.58   | -1.42  | 12.39  | 11.56  | 15.89  | 14.03  | 16.70  | 16.54  | 11.97  | 16.19  | 0.36   | 0.18   | 1.80   | 1.67   | 1.05   | 1.03   | -1.25  | 1.61   | 0.26   | -0.01  | -4.92  | -3.95  | -2.63  | -7.37  |       |
| 2.23   | -8.45  | -13.49 | -2.67  | 0.84   | -9.94  | 13.33  | 11.10  | 14.25  | 14.02  | 15.96  | 16.59  | 13.02  | 14.98  | -1.88  | -0.99  | 1.09   | 2.76   | 0.26   | 1.24   | -2.37  | 1.00   | 0.97   | 1.46   | -0.41  | -7.95  | -2.15  | -0.76  | -8.00 |
| -51.73 | -55.20 | -53.78 | -46.63 | -43.97 | -58.11 | -34.55 | -25.87 | -37.95 | -34.14 | -36.33 | -28.75 | -32.01 | -41.18 | 1.65   | -0.22  | 4.27   | -0.78  | 1.45   | -0.31  | 1.13   | 1.14   | 2.08   | -0.07  | -2.00  | -4.05  | -0.31  | -6.73  |       |
| -18.54 | -16.65 | -15.00 | -15.90 | -16.23 | -20.96 | -14.19 | -15.10 | -12.05 | -14.96 | -19.72 | -6.99  | -17.29 | -13.17 | -3.79  | -0.24  | -0.78  | -3.18  | -2.34  | -1.31  | -0.91  | -1.85  | -0.53  | -0.68  | -1.37  | -0.87  | -0.55  | -0.94  |       |
| -29.33 | -27.53 | -25.85 | -22.85 | -23.67 | -31.93 | -23.21 | -23.01 | -21.78 | -23.78 | -30.33 | -15.03 | -28.42 | -23.97 | -0.39  | 1.87   | -0.24  | -1.15  | -0.13  | -0.13  | 1.39   | 2.73   | 1.40   | 2.83   | 2.39   | 2.51   | 2.17   | 1.08   |       |
| -5.76  | -9.60  | -13.38 | -4.73  | -2.96  | -12.05 | -0.53  | 3.67   | -1.68  | -2.18  | -4.97  | 1.11   | -2.43  | -1.38  | 0.88   | -0.73  | -0.13  | 0.58   | -0.34  | 0.82   | 2.29   | 1.61   | 1.63   | 3.63   | -1.97  | 1.05   | -0.01  | -3.15  |       |
| -29.66 | -29.14 | -28.67 | -30.61 | -31.00 | -33.25 | -23.21 | -23.81 | -31.99 | -26.44 | -30.73 | -29.88 | -29.98 | -34.41 | -17.23 | -22.98 | -19.67 | -21.68 | -19.96 | -18.67 | -18.30 | -29.03 | -24.26 | -29.23 | -29.13 | -22.10 | -17.23 | -23.63 |       |
| 1.68   | 2.37   | 2.28   | 2.15   | 2.35   | 2.45   | 2.90   | 4.42   | 4.08   | 3.21   | 3.46   | 3.55   | 3.22   | 5.04   | 0.99   | 3.34   | 1.50   | 2.19   | 1.11   | 2.11   | 1.37   | 3.76   | 0.89   | 1.81   | 2.46   | 1.38   | 1.40   | 1.57   |       |
| 6.19   | 4.48   | 5.28   | 5.94   | 4.69   | 7.74   | 3.96   | 7.57   | 8.39   | 5.19   | 5.92   | 6.14   | 5.37   | 8.73   | 1.61   | 3.51   | 1.32   | 3.07   | 1.72   | 2.61   | 4.57   | 6.39   | 2.94   | 5.50   | 5.68   | 2.43   | 2.54   | 2.90   |       |
| -2.27  | -3.24  | -2.82  | -1.06  | -2.48  | -1.60  | 1.14   | 0.89   | 3.83   | 0.26   | 2.50   | 1.99   | 0.31   | 1.63   | -3.30  | 0.34   | -0.39  | 0.19   | -0.32  | 0.28   | -0.26  | -2.58  | -0.41  | 1.00   | -1.70  | -0.60  | -3.02  | -1.13  |       |
| -0.72  | -1.76  | -1.58  | 0.10   | -0.29  | -0.68  | 0.91   | -1.19  | 2.07   | 0.39   | 1.41   | 2.07   | 0.40   | 0.24   | -2.18  | -0.57  | -0.72  | -0.46  | 0.25   | 0.01   | -0.17  | -2.98  | -2.35  | -1.46  | -1.90  | -1.75  | -4.39  | -1.87  |       |
| -0.60  | 0.34   | 0.51   | 0.24   | 0.25   | 0.28   | 1.46   | 4.45   | 4.15   | 3.89   | 3.30   | 2.13   | 1.58   | 2.18   | -0.94  | -0.80  | 0.31   | -1.59  | -0.37  | -0.55  | -0.91  | -1.20  | -0.41  | -1.17  | -0.29  | -1.74  | -2.69  | 0.28   |       |
| -4.64  | 11.17  | 26.72  | 3.78   | -1.49  | 1.74   | -12.62 | 4.38   | 1.48   | -4.06  | 4.38   | -0.52  | -5.57  | -5.23  | -9.40  | -2.30  | -1.30  | -1.71  | -3.13  | -0.56  | 2.16   | -0.12  | -2.21  | -2.89  | 2.72   | -3.06  | -5.73  | -13.97 |       |
| 2.44   | 8.86   | 29.36  | 12.75  | 2.89   | 7.95   | -16.72 | 4.35   | 2.82   | -2.51  | 4.81   | -0.95  | -7.65  | -4.78  | -8.59  | 2.31   | -1.50  | 1.79   | -2.72  | -1.20  | 3.18   | 3.30   | -2.42  | -4.37  | 4.14   | -3.00  | -4.24  | -13.10 |       |
| 10.66  | 9.82   | 32.87  | 25.66  | 7.91   | 18.16  | -26.78 | 3.92   | 0.72   | -3.34  | 5.08   | -1.32  | -11.40 | -8.86  | -6.35  | 3.03   | 1.24   | 3.90   | -2.28  | 2.12   | 5.37   | 1.79   | -3.42  | -4.91  | 9.08   | -6.43  | -3.86  | -16.81 |       |
| -4.80  | -9.19  | -11.48 | -7.79  | -6.49  | -6.92  | 2.99   | 6.48   | 7.58   | 7.90   | 6.39   | 8.17   | 6.11   | 4.84   | -6.01  | -5.22  | -4.12  | -2.69  | -5.90  | -4.74  | -8.12  | -4.10  | -3.37  | -4.54  | -7.89  | -7.16  | -4.82  | -7.77  |       |
| -6.31  | -11.61 | -15.66 | -10.67 | -9.51  | -10.14 | 3.81   | 6.11   | 7.75   | 9.39   | 8.54   | 9.33   | 5.81   | 5.01   | -9.56  | -6.66  | -5.53  | -2.42  | -6.43  | -5.38  | -9.40  | -3.87  | -4.05  | -4.78  | -10.54 | -8.17  | -5.78  | -11.34 |       |
| -15.03 | -16.90 | -20.24 | -8.81  | -10.06 | -14.14 | -12.52 | -9.62  | -12.45 | -10.44 | -10.91 | -10.98 | -12.46 | -12.23 | 14.57  | 15.20  | 13.83  | 13.50  | 16.36  | 12.68  | 11.94  | 10.59  | 10.54  | 11.78  | 8.67   | 7.30   | 10.41  | 9.30   |       |
| -1.18  | 0.40   | 1.65   | 1.80   | 0.55   | 3.37   | 6.74   | 6.23   | 5.58   | 9.18   | 8.35   | 5.01   | 7.02   | 9.84   | -2.65  | -1.28  | -0.92  | -0.97  | 0.17   | -0.31  | -0.69  | -5.59  | -2.35  | -2.98  | -5.05  | -3.77  | 4.43   | -4.01  |       |
| 55.40  | 53.33  | 55.87  | 51.54  | 46.76  | 59.67  | 56.91  | 50.53  | 61.59  | 58.81  | 55.69  | 43.94  | 53.92  | 61.70  | 0.55   | -0.61  | -2.38  | 3.23   | -0.64  | 1.34   | 1.14   | -6.42  | -4.16  | -9.76  | -15.68 | -8.97  | -8.63  | -14.57 |       |
| -1.12  | -2.03  | 2.47   | -4.30  | -0.98  | -2.05  | 5.68   | -0.23  | -0.20  | -0.52  | -2.43  | -0.50  | 1.01   | 1.40   | -0.10  | 0.56   | 3.16   | 2.30   | 1.66   | 1.97   | -3.38  | 6.22   | 6.71   | 4.10   | -2.46  | -1.05  | 2.07   | -2.72  |       |
| -4.42  | -2.17  | -5.67  | -1.20  | -2.76  | -3.94  | -2.65  | -2.19  | -6.05  | -2.08  | -5.50  | -4.30  | -3.92  | -4.09  | 4.11   | 3.22   | 4.00   | 3.53   | 3.91   | 3.61   | 5.45   | 5.50   | 1.76   | 2.89   | 3.13   | 5.10   | 3.67   | 6.90   |       |
| -6.34  | -3.82  | -6.57  | -2.85  | -4.54  | -5.38  | -4.28  | -2.75  | -5.06  | -2.99  | -5.68  | -3.21  | -4.39  | -4.36  | 3.76   | 1.50   | 4.23   | 3.03   | 4.50   | 2.58   | 2.50   | 5.90   | 3.18   | 2.76   | 3.43   | 4.91   | 3.60   | 5.90   |       |
| -3.25  | -2.66  | -5.20  | 0.09   | -3.32  | -2.02  | -0.90  | 5.44   | 0.23   | 1.63   | -0.83  | 7.42   | 0.21   | -1.20  | 3.86   | 0.03   | 1.39   | 2.21   | 1.46   | 1.85   | 0.96   | 2.39   | 0.72   | 1.28   | 1.75   | 3.68   | 1.59   | 5.26   |       |
| 5.76   | 5.21   | 7.93   | 5.01   | 2.83   | 3.20   | 7.12   | 4.28   | 6.62   | 12.04  | 11.42  | 6.16   | 6.83   | 11.85  | -5.17  | -5.63  | -3.22  | -4.60  | -5.32  | -5.70  | -5.03  | -13.19 | -10.88 | -10.60 | -14.21 | -11.14 | -13.79 | -15.33 |       |
| 13.75  | 19.62  | 21.09  | 15.22  | 11.29  | 14.99  | 13.10  | 6.52   | 10.23  | 20.30  | 21.18  | 8.70   | 14.78  | 21.21  | -11.54 | -11.81 | -9.83  | -7.41  | -10.06 | -10.06 | -9.79  | -26.33 | -23.46 | -23.35 | -26.93 | -21.86 | -28.34 | -28.61 |       |
| -10.06 | -18.23 | -19.52 | -11.90 | -15.02 | -16.73 | -2.09  | 1.52   | 0.59   | 1.42   | 1.74   | 4.42   | -1.10  | -3.89  | 3.89   | 1.84   | 2.61   | 2.41   | 2.33   | 2.67   | 1.66   | 10.13  | 7.19   | 7.57   | 12.12  | 7.34   | 11.30  | 12.75  |       |
| -0.17  | 0.08   | -0.01  | -0.02  | -0.01  | -0.68  | 1.63   | 1.34   | 3.10   | 2.38   | 1.91   | 2.88   | 1.33   | 1.17   | -2.28  | 0.49   | -0.19  | 0.56   | 0.41   | -0.22  | 0.24   | 0.26   | -1.76  | 2.29   | 1.67   | 2.47   | 2.32   | 1.34   |       |
| -0.23  | -1.36  | 0.25   | 0.26   | -1.11  | -1.39  | 2.50   | 1.86   | 5.67   | 3.43   | 2.27   | 4.67   | 1.90   | 3.15   | -2.51  | -0.07  | 0.91   | -0.08  | -0.14  | -0.20  | -0.34  | -0.51  | 4.45   | 4.44   | 0.08   | 5.16   | 3.26   | 1.04   |       |
| -1.60  | 0.31   | -0.29  | 0.18   | 0.39   | -1.57  | 1.30   | 1.46   | 8.38   | 4.83   | 1.13   | 4.04   | 0.40   | 1.34   | -0.37  | 1.38   | 0.27   | -0.88  | 1.17   | 1.41   | -0.79  | 0.21   | 5.06   | 8.70   | 1.75   | 7.71   | 3.42   | 1.03   |       |
| -3.27  | -13.01 | -14.60 | -7.35  | -6.46  | -10.19 | 8.44   | 11.17  | 13.26  | 13.73  | 12.03  | 13.45  | 9.54   | 9.73   | -9.06  | -8.90  | -7.88  | -7.53  | -8.61  | -6.76  | -8.63  | -4.66  | -4.75  | -3.34  | -8.17  | -3.02  | -5.02  | -8.62  |       |
| -4.59  | -15.37 | -16.02 | -8.59  | -8.15  | -11.16 | 9.20   | 10.87  | 13.76  | 13.14  | 12.88  | 14.14  | 8.97   | 11.93  | -13.56 | -11.62 | -11.18 | -10.19 | -12.52 | -11.52 | -12.09 | -6.83  | -6.59  | -4.91  | -11.28 | -4.55  | -3.89  | -11.30 |       |
| -6.10  | -4.81  | -5.62  | -5.43  | -3.91  | -9.97  | -3.86  | -5.61  | -4.20  | -3.37  | -4.48  | -2.75  | -3.52  | -4.83  | 10.40  | 9.54   | 9.61   | 9.00   | 10.27  | 7.84   | 8.74   | 5.50   | 5.43   | 7.59   | 5.51   | 5.11   | 6.56   | 5.12   |       |
| -2.28  | -2.53  | -5.73  | -2.81  | -2.86  | -7.76  | 1.86   | 1.89   | 2.87   | 4.23   | 3.57   | 5.07   | 1.49   | 2.07   | -0.92  | -0.91  | -1.17  | 0.21   | 0.76   | 0.42   | -0.74  | -2.76  | -2.88  | -2.96  | -4.06  | -4.26  | -3.59  | -3.30  |       |
| -3.59  | -4.20  | -4.97  | -0.55  | -2.11  | -4.75  | 1.50   | 1.19   | 1.64   | 2.08   | 0.47   | 3.33   | 0.50   | 2.28   | -0.03  | 0.36   | 1.31   | -0.05  | -0.43  | 0.13   | -0.20  | -1.47  | -0.52  | -0.13  | -1.24  | -0.78  | -1.61  | -1.00  |       |
| 1.12   | -2.07  | 1.69   | 2.55   | 1.35   | -1.52  | 0.84   | 2.81   | 3.65   | 2.37   | 2.39   | 1.62   | 1.09   | 1.50   | 2.20   | -0.30  | -1.53  | 0.75   | -0.43  | 0.56   | -1.28  | -0.29  | 0.01   | -1.12  | 0.16   | 0.76   | -0.60  | 2.64   |       |
| 21.11  | 18.27  | 18.61  | 19.85  | 16.85  | 19.32  | 24.26  | 18.71  | 29.29  | 26.28  | 30.98  | 26.17  | 22.23  | 25.37  | -1.74  | -1.07  | -2.19  | -0.12  | -3.40  | 0.56   | -1.28  | -0.47  | 0.01   | -1.12  | 0.16   | 0.76   | -0.60  | 2.64   |       |
| 48.12  | 37.51  | 40.94  | 48.27  | 47.53  | 50.33  | 54.01  | 43.44  | 63.34  | 62.34  | 65.94  | 58.24  | 51.70  | 63.87  | -4.93  | -5.58  | -2.94  | -0.41  | -3.60  | -1.99  | -3.10  | -6.88  | -6.43  | -5.03  | -14.47 | -7.67  | -6.84  | -14.85 |       |

|        |        |        |        |        |        |        |        |        |        |        |        |        |        |        |        |        |        |        |        |        |        |        |        |        |        |        |        |
|--------|--------|--------|--------|--------|--------|--------|--------|--------|--------|--------|--------|--------|--------|--------|--------|--------|--------|--------|--------|--------|--------|--------|--------|--------|--------|--------|--------|
| -4.52  | -5.30  | -4.99  | -5.11  | -4.34  | -7.85  | 0.60   | 0.86   | 4.91   | 2.05   | 3.84   | 5.71   | 1.95   | 1.97   | -0.27  | -0.52  | -0.44  | 0.21   | -0.13  | 0.84   | 0.40   | -5.06  | -1.93  | -0.91  | -4.01  | -3.36  | -6.09  | -4.52  |
| -3.91  | -1.02  | -0.62  | -1.62  | -1.69  | -4.05  | 0.66   | 2.67   | 4.07   | 1.88   | 2.41   | 3.10   | 1.66   | 2.17   | -0.56  | 0.49   | 1.63   | 1.31   | 0.94   | 1.10   | 0.56   | -0.74  | -0.93  | -0.15  | -2.14  | -1.71  | -4.41  | -2.19  |
| 0.14   | 22.46  | 21.34  | 2.75   | 1.72   | 3.08   | 2.80   | 3.68   | 4.12   | 0.68   | 4.36   | 4.74   | 4.28   | 2.35   | 0.78   | 2.53   | 1.07   | 1.01   | 0.86   | 1.01   | 1.56   | 1.01   | -1.19  | 2.37   | 1.23   | 2.06   | 0.46   | -0.15  |
| -2.85  | -2.45  | -4.48  | -0.12  | -2.75  | -1.21  | 0.66   | 1.99   | 3.45   | 1.06   | 2.24   | 3.39   | 0.63   | 1.89   | 5.46   | 7.51   | 5.02   | 6.25   | 8.49   | 9.17   | 6.55   | 12.83  | 12.37  | 14.21  | 11.89  | 9.21   | 8.28   | 12.55  |
| 2.99   | 0.04   | 1.68   | 3.86   | 2.36   | 4.57   | 2.19   | 3.88   | 4.01   | 2.24   | 3.21   | 3.04   | 3.32   | 2.99   | -0.35  | -2.05  | -0.08  | -0.23  | 0.75   | -0.99  | -0.37  | -2.78  | -1.68  | -1.85  | -4.03  | -1.82  | -5.30  | -2.17  |
| -1.44  | -2.64  | -5.93  | -0.68  | -1.21  | -1.14  | 1.47   | 2.50   | 2.04   | 1.24   | 2.15   | 1.35   | 1.59   | 2.27   | -0.49  | -1.14  | 0.12   | -0.02  | 0.00   | 1.12   | -0.82  | -1.25  | -0.58  | -1.10  | -2.96  | -2.04  | -4.15  | -3.70  |
| 2.79   | -4.81  | -4.09  | -0.20  | -0.74  | -4.34  | 10.70  | 9.21   | 14.14  | 12.37  | 15.46  | 15.95  | 11.17  | 13.79  | -0.56  | 0.10   | 1.41   | 1.83   | 0.88   | 1.02   | -1.68  | 1.66   | 0.47   | 0.49   | -3.61  | -3.24  | -2.52  | -7.32  |
| -0.66  | -10.41 | -14.09 | -5.60  | -2.61  | -12.35 | 11.85  | 9.79   | 12.06  | 11.94  | 14.99  | 13.94  | 11.11  | 13.83  | -2.04  | -1.06  | 1.07   | 2.64   | 0.74   | 1.47   | -2.25  | 1.21   | 1.17   | 2.28   | -8.30  | -2.36  | 0.61   | -7.80  |
| -49.31 | -50.83 | -47.92 | -44.41 | -41.97 | -53.29 | -29.15 | -21.88 | -33.92 | -31.22 | -32.24 | -25.30 | -28.11 | -36.37 | 0.16   | -0.92  | 3.92   | 0.71   | 2.10   | 1.22   | 1.90   | 1.18   | 2.41   | 0.86   | -1.38  | -2.27  | 0.11   | -7.35  |
| -18.58 | -15.87 | -14.39 | -16.05 | -16.33 | -20.05 | -13.95 | -12.59 | -10.27 | -12.85 | -16.83 | -15.21 | -16.61 | -12.56 | -3.46  | -1.36  | 0.04   | -0.97  | 0.14   | -1.56  | -0.53  | -1.92  | -0.80  | -0.19  | -1.47  | -0.76  | 0.91   | -1.03  |
| -28.80 | -25.27 | -21.97 | -21.36 | -21.90 | -29.64 | -21.52 | -20.57 | -19.75 | -22.88 | -28.25 | -13.07 | -26.43 | -23.13 | 0.06   | 2.98   | -0.03  | -0.72  | -0.12  | 1.67   | 2.29   | 4.52   | 2.86   | 3.61   | 4.06   | 3.12   | 2.96   | 2.76   |
| -5.00  | -9.61  | -12.16 | -3.51  | -3.45  | -10.90 | -1.63  | 3.26   | -0.92  | -2.76  | -4.13  | 0.21   | -0.72  | -1.89  | -0.18  | 0.31   | 0.89   | 0.53   | -0.16  | 1.21   | 1.87   | 2.10   | 0.72   | 3.72   | -2.44  | 1.21   | -0.03  | -2.21  |
| -32.56 | -32.13 | -31.19 | -32.70 | -32.72 | -36.39 | -25.45 | -24.64 | -32.23 | -26.76 | -32.31 | -31.64 | -30.73 | -35.70 | -19.30 | -25.08 | -21.23 | -23.42 | -21.08 | -19.76 | -19.23 | -33.25 | -26.58 | -31.09 | -31.06 | -22.31 | -29.08 | -25.60 |
| 1.12   | 1.95   | 2.25   | 1.74   | 1.80   | 2.26   | 3.10   | 3.91   | 3.92   | 3.05   | 3.57   | 3.97   | 3.90   | 4.62   | 1.17   | 3.16   | 1.88   | 2.70   | 1.31   | 2.06   | 1.68   | 3.12   | 2.32   | 1.85   | 1.98   | 1.17   | 0.91   | 1.30   |
| 6.69   | 4.37   | 5.98   | 6.22   | 4.67   | 7.56   | 2.61   | 8.02   | 8.30   | 4.84   | 5.89   | 7.50   | 6.13   | 9.27   | 1.43   | 4.43   | 1.01   | 3.19   | 2.55   | 3.66   | 4.59   | 5.17   | 2.40   | 6.17   | 5.29   | 3.08   | 2.76   | 3.65   |
| -3.31  | -4.91  | -4.57  | -2.59  | -3.47  | -2.63  | -0.74  | -0.68  | 3.55   | 0.66   | 1.66   | 1.57   | 0.80   | 2.66   | -2.20  | -0.02  | -0.55  | 0.47   | 0.31   | 1.34   | 0.17   | -3.89  | 0.13   | -0.06  | -2.25  | -1.56  | -3.12  | -1.12  |
| -1.33  | -2.77  | -2.54  | -1.15  | -1.23  | -1.91  | 0.52   | -0.09  | 2.11   | 0.04   | 2.13   | 2.20   | -0.15  | 0.21   | -2.48  | -0.14  | -0.65  | -0.43  | -0.09  | -0.56  | 0.01   | -2.06  | -2.04  | -1.57  | -1.83  | -1.78  | -4.13  | -2.09  |
| -1.80  | 0.65   | 0.10   | -0.54  | 0.11   | -0.79  | 1.33   | 6.17   | 4.77   | 3.63   | 3.59   | 1.74   | 2.55   | 2.57   | -0.74  | -1.06  | -0.15  | -0.68  | -0.69  | -0.61  | 0.17   | -1.91  | -1.04  | -0.87  | -0.47  | -1.54  | -1.41  | -0.34  |
| -1.46  | 1.25   | 25.32  | 3.24   | -1.74  | 2.37   | -13.02 | 3.45   | 2.23   | -3.97  | 5.72   | 0.27   | -5.43  | -3.72  | -9.01  | 2.14   | -1.52  | -0.76  | -2.54  | 0.24   | 2.21   | -0.11  | -1.99  | -4.66  | 3.37   | -2.76  | -6.04  | -14.56 |
| 5.60   | 10.58  | 28.39  | 12.63  | 2.55   | 7.64   | -17.45 | 4.94   | 2.88   | -2.63  | 5.79   | -0.14  | -7.92  | -3.94  | -8.73  | 2.30   | -1.67  | 2.92   | -2.74  | -0.37  | 5.02   | 0.38   | -3.41  | -4.77  | 3.90   | -3.09  | -6.53  | -13.50 |
| 12.43  | 11.74  | 33.62  | 26.48  | 10.01  | 19.34  | -25.75 | 3.73   | 1.32   | -2.77  | 6.50   | -3.08  | -14.46 | -3.73  | -6.59  | 2.34   | 0.92   | 3.95   | -1.66  | 2.80   | 6.56   | 1.25   | -4.64  | -6.92  | 7.64   | -5.40  | -9.45  | -17.52 |
| -6.40  | -10.66 | -12.34 | -8.86  | -8.47  | -7.85  | 2.03   | 5.99   | 6.44   | 7.06   | 4.94   | 8.59   | 5.17   | 4.08   | -5.80  | -6.38  | -4.43  | -2.86  | -5.77  | -3.70  | -8.38  | -4.41  | -2.82  | -3.74  | -7.83  | -7.21  | -4.60  | -8.24  |
| -7.52  | -12.37 | -15.98 | -11.15 | -11.72 | -11.49 | 3.27   | 5.07   | 7.85   | 9.18   | 8.59   | 8.94   | 5.39   | 4.57   | -9.35  | -5.91  | -5.74  | -2.63  | -6.72  | -5.49  | -9.86  | -3.31  | -3.73  | -3.75  | -10.43 | -7.86  | -5.19  | -11.16 |
| -13.67 | -15.30 | -18.11 | -7.69  | -4.72  | -10.40 | -9.05  | -5.79  | -8.48  | -7.86  | -8.28  | -5.84  | -10.81 | -8.81  | 13.09  | 16.11  | 13.74  | 13.43  | 13.77  | 13.95  | 15.09  | 10.59  | 13.01  | 11.47  | 9.71   | 7.66   | 10.67  | 9.50   |
| -2.56  | -0.43  | 0.36   | 0.09   | -0.98  | 0.86   | 5.50   | 5.76   | 5.86   | 8.32   | 7.94   | 5.68   | 6.42   | 9.79   | -2.68  | -0.20  | -1.45  | 0.34   | -0.11  | 0.31   | -0.17  | -6.42  | -2.16  | -4.57  | -5.21  | -3.75  | -4.60  | -4.82  |
| 51.22  | 48.12  | 50.70  | 47.70  | 40.45  | 54.60  | 52.89  | 45.88  | 58.88  | 53.86  | 53.16  | 41.34  | 50.12  | 58.16  | -0.37  | -1.96  | -2.81  | 1.90   | -1.54  | 0.27   | -0.34  | -7.21  | -5.27  | -10.30 | -18.98 | -10.07 | -9.56  | -15.38 |
| -0.96  | -2.50  | 3.66   | -4.78  | -1.77  | -1.01  | 5.43   | 1.01   | -0.32  | -0.96  | -2.07  | -0.63  | 0.75   | 1.23   | -0.86  | 0.37   | 2.64   | 2.85   | 1.34   | 3.13   | -1.14  | 4.41   | 6.03   | 4.96   | -4.18  | -0.53  | 2.41   | -3.33  |
| -3.63  | -1.00  | -3.19  | -0.77  | -1.58  | -2.40  | -1.34  | 0.52   | -5.27  | -3.11  | -3.94  | -3.16  | -1.64  | -3.78  | 4.17   | 3.96   | 4.17   | 3.84   | 4.86   | 3.70   | 6.41   | 4.94   | 2.70   | 3.26   | 3.24   | 5.20   | 4.10   | 7.53   |
| -6.49  | -3.65  | -4.42  | -2.03  | -3.32  | -3.97  | -4.08  | -0.75  | -4.31  | -2.81  | -4.54  | -1.99  | -3.32  | -3.34  | 4.52   | 1.87   | 4.03   | 3.32   | 4.63   | 3.19   | 2.71   | 6.27   | 3.43   | 3.03   | 4.11   | 5.01   | 4.10   | 6.40   |
| -4.57  | -4.50  | -4.36  | 0.59   | -2.97  | -1.52  | 0.07   | 5.63   | 0.92   | 0.90   | -0.15  | 1.50   | -0.90  | -0.47  | -0.68  | 3.63   | 0.61   | 0.19   | 1.88   | 2.01   | 2.31   | 1.54   | 2.89   | 0.56   | 0.98   | 4.48   | 1.89   | 3.81   |
| 2.81   | 2.98   | 5.50   | 3.47   | 0.64   | 0.14   | 4.39   | 3.95   | 5.18   | 11.62  | 10.83  | 6.12   | 7.25   | 10.90  | -4.59  | -6.01  | -3.93  | -3.99  | -4.54  | -4.74  | -4.06  | -13.52 | -12.12 | -12.08 | -15.50 | -11.74 | -14.89 | -16.14 |
| 11.44  | 16.63  | 18.32  | 13.06  | 9.07   | 12.78  | 12.31  | 5.90   | 10.42  | 20.27  | 20.94  | 8.66   | 14.20  | 20.93  | -12.91 | -13.13 | -10.49 | -8.50  | -11.46 | -11.93 | -10.86 | -27.82 | -23.78 | -24.22 | -28.50 | -23.03 | -29.32 | -29.97 |
| -9.51  | -18.28 | -19.49 | -12.24 | -16.18 | -17.13 | -2.46  | 2.00   | 1.46   | 3.35   | 3.04   | 4.06   | 0.21   | -2.84  | 6.23   | 1.86   | 1.95   | 3.23   | 3.13   | 4.69   | 3.00   | 10.94  | 6.65   | 9.74   | 12.12  | 7.21   | 10.73  | 12.20  |
| -1.16  | -0.96  | -0.90  | -0.30  | -1.41  | -1.52  | 0.62   | 2.98   | 1.89   | 2.48   | 2.15   | 3.10   | 1.37   | 3.03   | -2.49  | 0.90   | -0.91  | 0.74   | 0.53   | 0.45   | 0.64   | 0.13   | -0.37  | 2.74   | 2.75   | 2.91   | 3.52   | 1.50   |
| -1.79  | -2.83  | -1.20  | -1.30  | -2.06  | -2.55  | 1.84   | 1.68   | 5.32   | 3.08   | 3.35   | 4.32   | 3.17   | 3.14   | -1.83  | 0.41   | 1.03   | -0.08  | 0.04   | -0.14  | 0.14   | 0.17   | 5.61   | 6.24   | 1.06   | 6.70   | 3.92   | 1.30   |
| -2.40  | -0.76  | -1.08  | -0.86  | 0.02   | -2.77  | 1.21   | 0.84   | 7.35   | 5.43   | 1.52   | 4.37   | 2.22   | 1.10   | 0.01   | 1.15   | 1.19   | -0.46  | 2.29   | 1.50   | 0.24   | 2.49   | 7.00   | 9.49   | 2.88   | 12.52  | 3.45   | 0.66   |
| -6.19  | -15.65 | -17.26 | -9.55  | -9.68  | -14.17 | 4.74   | 8.72   | 9.88   | 10.68  | 10.41  | 10.93  | 6.71   | 8.00   | -9.11  | -9.11  | -8.31  | -7.80  | -8.63  | -6.97  | -8.68  | -4.79  | -5.12  | -3.20  | -8.26  | -2.26  | -6.94  | -8.04  |
| -6.94  | -17.54 | -18.82 | -11.58 | -12.74 | -14.62 | 6.89   | 7.65   | 12.57  | 12.59  | 10.26  | 13.24  | 7.31   | 9.60   | -13.73 | -12.51 | -11.76 | -10.52 | -12.57 | -10.54 | -12.30 | -7.34  | -7.20  | -5.35  | -11.13 | -5.12  | -8.11  | -11.84 |
| -6.21  | -4.25  | -4.97  | -4.64  | -3.29  | -9.70  | -2.01  | -3.91  | -2.66  | -1.70  | -2.23  | -2.19  | -1.88  | -4.51  | 10.94  | 9.96   | 10.34  | 8.86   | 10.83  | 8.98   | 9.40   | 6.26   | 6.27   | 6.89   | 5.70   | 6.24   | 6.04   | 6.10   |
| -3.53  | -4.29  | -8.46  | -3.85  | -4.29  | -9.07  | 0.00   | 1.46   | 3.52   | 4.09   | 3.69   | 5.80   | 2.24   | 3.03   | -1.24  | -1.43  | -1.17  | 0.29   | -0.41  | 0.16   | -0.79  | -2.89  | -2.74  | -2.87  | -4.14  | -3.54  | -4.10  | -3.08  |
| -4.34  | -4.32  | -6.16  | -0.96  | -2.88  | -4.94  | 1.42   | 2.23   | 2.50   | 2.69   | 1.95   | 4.08   | 1.50   | 2.43   | 0.44   | 0.32   | 0.60   | -0.04  | -0.26  | 0.37   | 0.21   | -1.26  | -0.37  | -0.55  | -1.25  | -0.50  | -1.39  | -1.33  |
| 1.32   | -3.46  | 0.37   | 2.03   | 1.28   | -2.16  | 0.41   | 2.56   | 3.18   | 1.38   | 3.24   | 3.01   | 0.85   | 1.93   | 1.84   | -0.26  | -0.08  | 1.14   | -2.28  | 0.01   | -0.25  | -0.83  | -0.55  | -0.50  | -0.29  | 1.43   | 0.50   | 2.14   |
| 18.39  | 15.87  | 15.36  | 16.27  | 13.32  | 16.39  | 20.99  | 16.86  | 26.26  | 24.06  | 29.36  | 24.97  | 20.00  | 23.94  | -2.74  | -0.60  | -2.42  | -1.36  | -2.48  | -1.61  | -1.47  | -1.14  | -5.55  | -5.80  | -7.72  | -3.75  | -8.09  | -11.08 |
| 39.98  | 27.26  | 28.99  | 38.93  | 37.81  | 39.86  | 46.74  | 36.35  | 57.08  | 58.42  | 58.94  | 52.45  | 47.98  | 57.05  | -5.52  | -5.93  | -3.44  | -0.69  | -5.54  | -2.48  | -4.21  | -8.22  | -6.92  | -6.26  | -15.57 | -8.93  | -6.63  | -15.64 |
| -30.48 | -30.23 | -44.62 | -31.43 | -26.55 | -41.45 | -18.30 | -14.63 | -19.90 | -16.54 | -19.32 | -15.68 | -17.94 | -23.05 | 1.54   | 3.94   | 6.54   | 3.43   | 3.89   | 1.82   | 1.28   | 9.36   | 9.29   | 10.44  | 4.72   | 1.62   | 9.06   | 1.60   |
| -0.01  | -7.04  | 0.76   | 6.97   | 11.30  | -4.82  | -6.34  | -0.39  | 3.18   | 3.52   | 7.11   | 9.14   | -1.33  | -5.36  | -0.09  | -1.84  | -0.56  | -0.47  | -1.25  | 0.38   | 2.01   | -3.50  | -2.44  | 2.24   | -0.12  | -2.32  | -4.06  | -7.39  |
| 4.42   | -2.87  | 1.98   | 14.07  | -5.90  | 0.61   | -10.19 | 2.46   | 3.37   | 4.64   | 7.56   | 6.74   | -4.38  | -5.89  | 0.87   | 0.92   | 0.28   | 2.82   | 1.55   | -0.13  | 3.67   | -3.58  | -2.39  | 4.03   | 0.98   | -1.62  | -3.64  | -6     |

|        |        |        |        |        |        |        |        |        |        |        |        |        |        |        |        |        |        |        |        |        |        |        |        |        |        |        |        |
|--------|--------|--------|--------|--------|--------|--------|--------|--------|--------|--------|--------|--------|--------|--------|--------|--------|--------|--------|--------|--------|--------|--------|--------|--------|--------|--------|--------|
| -1.39  | -1.13  | 2.06   | 3.02   | -0.09  | 1.71   | 1.88   | 2.12   | 4.06   | 3.45   | 3.52   | 3.13   | 2.88   | 2.92   | 6.13   | 7.68   | 4.83   | 6.97   | 8.27   | 8.46   | 7.02   | 13.99  | 12.23  | 14.10  | 12.31  | 10.03  | 8.35   | 13.10  |
| 3.86   | 2.31   | 3.53   | 6.68   | 1.79   | 5.72   | 2.63   | 3.77   | 3.57   | 2.29   | 3.28   | 3.63   | 2.83   | 3.65   | 0.77   | -1.34  | -0.15  | -0.13  | -0.50  | -1.19  | -0.28  | -2.65  | -1.89  | -2.22  | -3.91  | -1.90  | -4.90  | -2.95  |
| -0.56  | -0.25  | -1.75  | 0.78   | -1.16  | 0.74   | 0.73   | 2.98   | 2.65   | 0.11   | 2.53   | 2.33   | 1.13   | 0.86   | 0.31   | -0.50  | 0.46   | -0.80  | -0.67  | -0.28  | -0.76  | -2.68  | -0.39  | -1.29  | -2.15  | -2.51  | -3.84  | -2.53  |
| 2.13   | -5.83  | -4.88  | -7.27  | -3.70  | -6.54  | 9.01   | 8.55   | 12.46  | 11.15  | 14.24  | 13.18  | 9.90   | 12.90  | 0.33   | -0.24  | 1.19   | 1.20   | 1.20   | 1.28   | -1.22  | 1.86   | 0.34   | -0.12  | -4.25  | -3.21  | -2.77  | -7.33  |
| -2.23  | -12.16 | -16.88 | -9.70  | -4.81  | -14.79 | 10.74  | 7.73   | 10.62  | 10.78  | 13.50  | 12.93  | 10.12  | 11.15  | -1.97  | -1.15  | 1.10   | 2.71   | 0.47   | 1.34   | -2.43  | 0.86   | 0.99   | 2.09   | -7.05  | -2.09  | -0.28  | -7.37  |
| -45.05 | -47.40 | -41.57 | -48.25 | -38.23 | -49.25 | -25.30 | -17.65 | -30.80 | -27.93 | -29.00 | -22.35 | -25.92 | -32.54 | 1.17   | 0.48   | 3.91   | 1.16   | 1.80   | 1.03   | 2.13   | 1.53   | 3.15   | 2.39   | -1.01  | -1.86  | 0.44   | -5.62  |
| -16.42 | -13.80 | -12.23 | -13.74 | -13.99 | -16.78 | -12.20 | -10.65 | -10.04 | -12.65 | -14.76 | -3.62  | -15.92 | -11.82 | -2.59  | -1.15  | -0.99  | -2.44  | -0.61  | -0.47  | 0.39   | -0.67  | 0.32   | 0.59   | -0.43  | -0.15  | 0.12   | 0.41   |
| -25.05 | -21.62 | -18.86 | -19.77 | -18.87 | -25.24 | -19.92 | -18.35 | -17.45 | -21.48 | -26.07 | -11.99 | -25.62 | -20.66 | 1.15   | 3.42   | 1.54   | -0.14  | 1.42   | 2.09   | 2.32   | 4.78   | 3.77   | 4.13   | 5.41   | 4.32   | 3.71   | 2.61   |
| -5.40  | -8.36  | -9.83  | -6.76  | -2.46  | -14.45 | -0.14  | 2.83   | -1.08  | -1.66  | -2.88  | 2.36   | -2.43  | -0.82  | 0.00   | 1.05   | 0.76   | 0.87   | -0.43  | 3.52   | 1.96   | 2.28   | 1.00   | 3.59   | -1.52  | 7.70   | -0.60  | -2.34  |
| -31.88 | -30.36 | -30.07 | -31.88 | -33.10 | -33.96 | -26.08 | -26.66 | -34.02 | -28.54 | -32.01 | -31.18 | -31.57 | -36.50 | -19.74 | -26.24 | -22.23 | -24.86 | -22.97 | -21.43 | -20.18 | -33.80 | -26.53 | -32.35 | -33.08 | -24.22 | -30.59 | -27.08 |
| 3.06   | 3.33   | 2.98   | 2.38   | 2.84   | 2.54   | 3.07   | 3.98   | 3.61   | 3.82   | 3.11   | 4.35   | 3.83   | 4.59   | 1.77   | 3.87   | 1.45   | 2.58   | 1.45   | 1.48   | 1.19   | 2.58   | 2.54   | 1.65   | 2.78   | 1.91   | 1.82   | 1.97   |
| 7.49   | 6.57   | 5.92   | 7.54   | 6.56   | 8.52   | 3.73   | 8.13   | 9.24   | 4.95   | 7.32   | 8.54   | 6.07   | 10.12  | 2.83   | 5.21   | 1.92   | 3.78   | 3.10   | 3.70   | 5.81   | 5.44   | 3.22   | 6.12   | 5.66   | 3.40   | 2.84   | 3.50   |
| -2.21  | -1.84  | -1.93  | 0.55   | -0.62  | -1.38  | -0.54  | 0.73   | 3.55   | 0.15   | 1.73   | 2.10   | 0.89   | 2.81   | -3.66  | 0.50   | -0.29  | 0.46   | -0.20  | 0.34   | -0.32  | -3.36  | -0.88  | 0.39   | -2.07  | -1.95  | -3.86  | -1.47  |
| -0.28  | -1.60  | -2.08  | -0.54  | -0.56  | -0.84  | 0.03   | -1.23  | 1.67   | 0.34   | 2.44   | 2.02   | 0.81   | 0.25   | -1.79  | -0.58  | -0.69  | -0.70  | 0.13   | -0.11  | 0.20   | -1.86  | -1.34  | -0.95  | -2.89  | -1.80  | -4.64  | -3.19  |
| -0.17  | -0.10  | 0.32   | 1.67   | 0.22   | 1.10   | 3.21   | 4.85   | 4.09   | 3.26   | 4.10   | 3.16   | 2.68   | 2.47   | 1.18   | 0.06   | -0.10  | -0.30  | -0.36  | -0.52  | -0.48  | 0.05   | -0.40  | -0.56  | -0.70  | -1.37  | -0.86  | -1.05  |
| -0.53  | 18.24  | 30.88  | 0.36   | 2.69   | -3.63  | -11.66 | 3.76   | 0.19   | -4.58  | 5.65   | 0.08   | -4.77  | 0.25   | -14.37 | 1.76   | -1.43  | -1.37  | -1.75  | -0.71  | 2.05   | -1.78  | -3.75  | -3.35  | -5.81  | -6.75  | -8.70  | -15.71 |
| 5.74   | 16.60  | 34.87  | 9.67   | 6.37   | 2.51   | -17.23 | 5.34   | 1.56   | -2.96  | 6.68   | -0.46  | -8.11  | -1.20  | -14.21 | 2.75   | -1.53  | 1.54   | -1.66  | -0.38  | 4.55   | -1.57  | -5.09  | -6.38  | -5.38  | -5.77  | -9.28  | -14.98 |
| 15.74  | 18.18  | 41.07  | 18.16  | 15.69  | 14.60  | -25.45 | 4.22   | 0.08   | -3.67  | 6.44   | -2.76  | -13.33 | -2.46  | -13.39 | 3.14   | 0.68   | 4.22   | -1.44  | 2.68   | 5.80   | -2.49  | -8.38  | -9.01  | -5.41  | -7.08  | -10.72 | -21.14 |
| -7.83  | -10.72 | -12.98 | -9.14  | -9.61  | -8.30  | 1.28   | 4.57   | 6.61   | 6.80   | 5.79   | 7.54   | 4.68   | 4.04   | -5.58  | -5.10  | -4.67  | -3.30  | -6.09  | -3.63  | -8.75  | -3.96  | -2.19  | -3.79  | -7.58  | -6.75  | -4.06  | -9.38  |
| -7.92  | -12.81 | -17.66 | -12.88 | -11.90 | -11.84 | 2.16   | 4.29   | 7.52   | 9.06   | 8.36   | 8.72   | 4.47   | 3.94   | -9.87  | -5.52  | -6.21  | -3.14  | -6.54  | -5.12  | -9.74  | -3.41  | -3.49  | -3.92  | -9.42  | -7.48  | -4.63  | -10.37 |
| -10.83 | -13.37 | -14.43 | -5.00  | -5.80  | -8.77  | -4.71  | -1.92  | -5.24  | -6.65  | -4.39  | -5.88  | -8.08  | -6.63  | 14.56  | 15.66  | 14.81  | 13.19  | 17.46  | 13.81  | 14.33  | -11.63 | 9.95   | 11.84  | 10.08  | 7.20   | 11.61  | 10.62  |
| 0.04   | 0.63   | -2.72  | 2.74   | 1.34   | 2.54   | 6.23   | 6.50   | 6.08   | 9.79   | 8.99   | 5.94   | 6.25   | 10.18  | -3.11  | -0.41  | -1.83  | -0.40  | -0.13  | -0.97  | 0.06   | -3.40  | -5.41  | -5.77  | -3.62  | -5.93  | -4.08  |        |
| 48.69  | 44.79  | 39.17  | 44.65  | 37.49  | 51.34  | 48.03  | 41.02  | 55.32  | 52.16  | 51.60  | 40.45  | 48.59  | 55.39  | -1.60  | -3.58  | -4.75  | 0.51   | -3.75  | -1.07  | -1.47  | -9.59  | -6.11  | -11.43 | -20.28 | -11.37 | -10.22 | -17.81 |
| -1.10  | -2.73  | -3.46  | -5.07  | -3.24  | -3.26  | 3.82   | 2.16   | -0.05  | -0.35  | -1.12  | -0.93  | -0.15  | 2.19   | -0.24  | 0.59   | 2.29   | 3.91   | 0.48   | 2.17   | -1.83  | 5.10   | 6.86   | 3.32   | -3.51  | -0.81  | -2.22  | -2.31  |
| -2.09  | 0.14   | -4.28  | 1.11   | 1.03   | -1.42  | -1.04  | 0.86   | -3.72  | -1.55  | -2.35  | -2.80  | -1.30  | -1.81  | 5.14   | 4.74   | 4.27   | 3.69   | 4.95   | 3.37   | 6.36   | 5.57   | 3.32   | 3.58   | 3.78   | 5.60   | 6.11   | 7.77   |
| -3.52  | -0.04  | -5.29  | -0.58  | -0.57  | -3.88  | -3.20  | -0.35  | -3.90  | -1.29  | -4.12  | -1.97  | -2.85  | -2.77  | 4.29   | 1.81   | 4.66   | 3.60   | 4.67   | 3.66   | 3.06   | 6.26   | 3.71   | 3.39   | 4.21   | 5.46   | 6.33   | 6.67   |
| -2.30  | -1.65  | -6.08  | 1.48   | 0.41   | -1.70  | 0.87   | 6.09   | 1.07   | 2.12   | 1.43   | 8.92   | 1.66   | -0.81  | 4.81   | 1.39   | 1.79   | 2.82   | 2.45   | 1.12   | 1.30   | 2.32   | 1.11   | 1.84   | 0.85   | 3.91   | 2.08   | 5.19   |
| 5.07   | 4.22   | 6.11   | 3.83   | 1.08   | 2.92   | 4.37   | 3.38   | 5.86   | 10.93  | 11.86  | 6.04   | 6.86   | 11.48  | -5.20  | -6.39  | -5.15  | -4.88  | -5.65  | -6.27  | -4.88  | -14.03 | -11.89 | -12.28 | -15.08 | -11.89 | -16.00 | -16.06 |
| 12.43  | 16.36  | 16.69  | 12.76  | 8.14   | 12.53  | 11.66  | 5.67   | 9.09   | 20.44  | 20.30  | 8.99   | 13.71  | 19.93  | -13.44 | -13.26 | -11.63 | -9.37  | -12.83 | -12.11 | -11.68 | -29.41 | -25.00 | -25.23 | -31.00 | -24.36 | -31.19 | -31.73 |
| -10.12 | -17.89 | -17.38 | -13.26 | -14.34 | -15.83 | -1.38  | 1.45   | 1.66   | 3.33   | 3.29   | 5.49   | -0.59  | -1.59  | 5.70   | 3.16   | 3.59   | 2.22   | 3.23   | 3.72   | 1.91   | 12.46  | 7.78   | 9.13   | 13.23  | 8.44   | 11.49  | 13.01  |
| 0.77   | 0.65   | -0.09  | 0.69   | 0.24   | -0.57  | 1.12   | 2.93   | 2.49   | 1.44   | 2.93   | 3.15   | 1.08   | 2.14   | 0.01   | 0.37   | -0.35  | 0.91   | 0.91   | 0.88   | 1.43   | 0.98   | 0.74   | 3.42   | 3.60   | 4.34   | 3.99   | 2.32   |
| 0.49   | -0.03  | 1.25   | 1.02   | -0.45  | -0.62  | 2.22   | 2.07   | 4.54   | 3.59   | 3.21   | 4.72   | 1.84   | 2.80   | -0.35  | 0.14   | 1.22   | 0.12   | 0.15   | 0.15   | -0.34  | 1.26   | 7.92   | 6.72   | 1.57   | 7.31   | 4.15   | 2.11   |
| -2.14  | 0.48   | -1.48  | 1.87   | -0.35  | -0.66  | 2.18   | 1.43   | 9.44   | 3.84   | 2.61   | 3.82   | 0.50   | 2.20   | 4.02   | 0.48   | 2.14   | -0.48  | 1.37   | 0.59   | -0.74  | 0.05   | 7.37   | 6.69   | 2.13   | 14.37  | 3.23   | 1.46   |
| -6.19  | -16.66 | -18.05 | -9.97  | -10.17 | -14.77 | 3.88   | 6.49   | 8.00   | 9.61   | 8.96   | 9.74   | 5.28   | 5.78   | -9.17  | -9.78  | -8.78  | -8.28  | -9.97  | -7.12  | -8.11  | -5.22  | -5.01  | -3.29  | -8.53  | -2.06  | -6.75  | -8.66  |
| -7.57  | -19.14 | -21.08 | -12.45 | -12.34 | -15.83 | 5.40   | 5.49   | 10.42  | 11.84  | 9.34   | 11.29  | 5.82   | 7.50   | -14.22 | -12.68 | -12.34 | -10.79 | -12.63 | -10.95 | -12.59 | -7.24  | -7.16  | -5.71  | -11.53 | -5.68  | -8.86  | -11.31 |
| -3.52  | -3.60  | -4.01  | -4.53  | -3.79  | -9.23  | 0.56   | -2.63  | -0.60  | -0.42  | -0.93  | 0.36   | -1.16  | -1.91  | 10.41  | 9.77   | 10.41  | 7.92   | 10.20  | 8.67   | 8.94   | 5.89   | 5.79   | 9.21   | 6.83   | 6.69   | 6.59   | 6.18   |
| -3.82  | -3.83  | -1.42  | -2.71  | -3.51  | -7.29  | 1.20   | 2.30   | 3.56   | 4.21   | 5.33   | 6.41   | 2.92   | 3.12   | -0.27  | -1.37  | -0.93  | -0.13  | -1.19  | 0.17   | -1.50  | -3.10  | -3.04  | -2.72  | -4.30  | -3.87  | -4.34  | -3.28  |
| -1.72  | -3.43  | -1.22  | 0.44   | -0.54  | -3.29  | 2.31   | 1.80   | 2.52   | 3.20   | 3.76   | 5.05   | 1.85   | 3.63   | -0.59  | 0.16   | 0.46   | -0.46  | 0.09   | 0.34   | -0.12  | -1.17  | -0.59  | -0.65  | -0.59  | -0.46  | -2.07  | -0.94  |
| 1.23   | -3.28  | 2.61   | 2.58   | 1.69   | -0.29  | 2.83   | 2.43   | 4.34   | 1.74   | 2.44   | 2.76   | 0.74   | 1.70   | 1.76   | 0.80   | -0.20  | 1.08   | 0.74   | 0.16   | -0.04  | -0.40  | -0.08  | -0.06  | 1.86   | -5.09  | 2.32   |        |
| 18.26  | 13.75  | 14.40  | 17.95  | 14.12  | 15.22  | 19.34  | 14.47  | 24.97  | 25.14  | 28.14  | 24.07  | 18.61  | 21.83  | -1.46  | -1.58  | -3.92  | -0.15  | -3.86  | -2.57  | -1.82  | -6.91  | -5.34  | -6.75  | -9.03  | -4.54  | -8.27  | -10.36 |
| 35.12  | 22.98  | 18.49  | 32.22  | 28.96  | 29.77  | 41.96  | 30.85  | 52.15  | 51.60  | 54.33  | 47.74  | 43.39  | 55.55  | -6.91  | -6.79  | -3.54  | -2.26  | -6.59  | -3.43  | -4.54  | -8.59  | -8.09  | -7.02  | -15.21 | -8.57  | -7.23  | -15.19 |
| -29.42 | -29.84 | -43.19 | -31.03 | -26.11 | -40.70 | -16.70 | -12.84 | -18.14 | -13.96 | -17.77 | -14.51 | -16.10 | -19.58 | 2.35   | 5.17   | 6.33   | 2.35   | 4.48   | 5.00   | 1.91   | 10.28  | 11.04  | 12.84  | 5.29   | 1.86   | 10.28  | 2.56   |
| 1.98   | -4.38  | 4.22   | 9.18   | -8.53  | -4.24  | -5.32  | 2.00   | 7.22   | 4.34   | 7.56   | 8.99   | -1.62  | 1.96   | 0.55   | -2.01  | -0.80  | -0.18  | -2.38  | 1.21   | 1.81   | -4.79  | -3.48  | -2.18  | -1.30  | -1.68  | -8.00  | -9.57  |
| 7.13   | -0.01  | 4.35   | 15.36  | -4.12  | 1.75   | -8.93  | 2.26   | 5.86   | 4.77   | 9.00   | 6.99   | -4.82  | 0.58   | 1.17   | 0.75   | 0.64   | 3.08   | 1.37   | 0.78   | 3.97   | -4.28  | -3.52  | -0.95  | -0.39  | -1.68  | -6.31  | -8.49  |
| 15.31  | 4.46   | 4.99   | 25.12  | 1.46   | 10.43  | -15.08 | 1.61   | 9.29   | 4.22   | 5.01   | 5.50   | -6.54  | 0.78   | 2.06   | 1.35   | 0.78   | 4.17   | 3.18   | 4.08   | 6.46   | -9.66  | -7.93  | -2.13  | -1.66  | -2.23  | -12.89 | -11.42 |
| -4.97  | -9.43  | -17.35 | -7.68  | -6.03  | -8.76  | 2.88   | 4.10   | 3.73   | 5.07   | 6.13   | 5.41   | 2.94   | 4.37   | -8.12  | -8.06  | -7.30  | -6.07  | -9.30  | -5.17  | -6.91  | -3.81  | -3.62  | -3.70  | -3.18  | -1.33  | -3.58  | -3.63  |
| -4.45  | -12.49 | -22.61 | -11.53 | -9.90  | -12.57 | 2.88   | 3.89   | 3.31   | 5.38   | 6.34   | 5.22   | 4.80   | 5.99   | -9.41  | -8.95  | -7.49  | -6.59  | -9.16  | -6.77  | -7.21  | -4.79  | -3.65  | -3.03  | -3.60  | -1.22  | -3.74  | -6.    |

| 53        | 54        | 55        | 56        | 57        | 58        | 59        | 60        | 61        | 62        | 63        | 64        | 65        | 66        | 67        | 68        | 69        | 70       | 71       | 72       | 73       | 74       | 75       | 76       | 77       | 78       | 79       | 80       |
|-----------|-----------|-----------|-----------|-----------|-----------|-----------|-----------|-----------|-----------|-----------|-----------|-----------|-----------|-----------|-----------|-----------|----------|----------|----------|----------|----------|----------|----------|----------|----------|----------|----------|
| P. aerug. | P. aerug. | S. aureus | S. epid. |
| 17        | 18        | 1         | 2         | 3         | 4         | 5         | 6         | 7         | 8         | 9         | 10        | 11        | 12        | 13        | 14        | 15        | m.1      | m.2      | m.3      | m.4      | m.5      | m.6      | m.7      | m.8      | m.9      | m.10     | m.11     |
| 0.25      | 0.29      | -0.86     | 0.89      | 0.90      | -0.03     | -0.26     | 0.68      | 0.25      | -1.20     | 1.62      | -1.97     | 0.39      | 1.26      | 0.72      | 0.54      | 0.64      | 0.37     | -0.66    | 0.05     | -0.50    | 1.33     | 0.62     | 1.40     | 1.89     | -0.40    | -0.06    | 0.74     |
| -0.12     | -0.90     | 1.08      | 0.33      | 0.52      | 0.01      | 0.61      | -0.32     | -0.11     | 1.23      | -0.03     | -0.61     | 0.25      | -0.89     | -0.46     | 0.08      | -0.27     | -0.06    | -0.66    | -0.08    | 0.53     | 0.10     | 1.77     | 1.28     | 0.76     | 0.43     | 0.32     | -0.10    |
| -0.08     | -0.05     | 0.60      | -0.24     | 0.90      | 0.19      | 0.18      | 0.66      | 0.03      | -0.21     | 0.15      | -0.12     | 0.71      | 0.31      | 0.09      | 0.07      | -0.16     | -0.06    | -0.01    | 0.52     | 0.55     | 0.28     | 0.54     | 0.58     | -0.40    | 0.61     | 0.83     | -0.19    |
| -0.59     | 0.09      | 1.11      | -0.44     | 1.21      | 0.83      | -1.05     | 0.46      | -0.21     | 0.22      | 0.72      | 1.42      | -0.66     | 0.97      | -0.93     | -0.01     | 0.37      | -0.20    | -0.85    | -1.29    | -0.03    | -0.57    | 1.43     | 0.53     | 1.08     | 0.73     | 1.85     | -0.27    |
| -0.25     | -0.83     | 0.27      | -0.23     | 1.10      | -0.05     | 0.90      | 0.01      | 0.14      | 0.63      | 0.08      | -0.34     | 0.18      | 0.50      | -0.49     | -0.72     | -0.43     | -0.17    | 0.08     | 0.28     | 0.47     | 0.58     | 0.43     | 0.41     | -0.75    | -0.24    | -0.66    | 0.29     |
| -0.37     | 0.09      | 0.29      | -0.54     | -0.02     | 0.79      | -0.60     | -0.83     | 1.80      | 1.09      | 0.76      | 2.10      | 0.43      | 2.71      | -1.71     | 1.10      | 0.87      | -0.39    | 0.45     | 3.10     | -1.13    | -0.97    | 0.10     | 0.71     | 0.12     | -0.88    | 0.15     | 0.68     |
| -0.32     | 0.23      | 0.94      | 0.29      | 0.82      | -0.02     | -0.05     | 0.63      | -0.14     | 1.49      | -0.16     | -0.06     | 0.73      | -0.28     | -0.30     | -0.42     | 0.08      | 0.58     | 1.23     | -0.02    | -1.16    | -0.07    | 1.45     | 0.68     | 0.82     | -0.38    | -0.09    | -0.51    |
| 0.22      | 0.03      | 0.17      | 0.01      | 0.88      | 0.39      | 0.30      | 0.12      | 0.27      | 0.15      | 1.00      | -0.24     | -0.33     | 0.50      | 0.18      | -0.48     | -0.35     | 0.15     | 0.65     | 0.09     | 1.01     | 2.28     | 1.54     | 0.94     | 1.00     | 0.07     | 0.37     | 1.08     |
| -0.59     | 0.70      | 0.24      | 0.19      | 0.83      | -0.84     | 1.59      | 0.40      | 1.03      | 0.90      | 1.46      | 1.13      | -2.17     | 0.56      | 0.72      | -0.80     | 0.28      | 1.32     | -0.25    | 1.89     | 1.19     | -0.86    | 1.85     | 0.56     | 1.32     | 1.01     | -0.59    | -0.14    |
| -0.01     | 0.20      | 2.27      | 0.71      | -1.12     | 1.08      | 1.26      | 3.44      | 1.36      | 1.79      | 0.89      | 1.37      | 1.54      | 1.88      | 1.24      | 0.68      | -0.70     | 0.00     | -1.51    | 1.20     | -0.95    | 2.11     | 2.57     | 0.87     | 0.95     | -0.56    | -0.99    | 0.70     |
| 0.46      | -0.42     | 2.02      | 1.51      | 0.08      | 1.18      | 0.39      | 3.78      | 1.91      | 3.86      | 0.86      | 1.26      | 2.58      | 0.84      | -1.13     | 1.54      | 0.87      | -0.30    | 0.64     | -1.09    | -1.97    | -2.95    | 5.26     | -3.21    | -1.18    | -3.66    | -1.34    | -1.53    |
| -0.31     | 1.20      | 0.82      | 0.90      | -3.36     | -0.40     | -1.03     | 0.55      | -1.42     | -0.64     | -0.94     | -1.15     | -0.71     | -0.77     | -2.99     | -1.07     | -0.84     | -0.27    | 0.66     | 0.32     | -2.17    | -2.28    | 1.88     | -1.05    | -0.23    | -3.49    | -1.08    | 0.21     |
| -2.20     | 0.05      | 1.57      | 2.71      | 3.58      | 2.87      | -0.42     | 3.04      | 2.79      | 3.21      | -0.78     | 0.20      | 0.79      | 1.65      | -0.63     | 0.27      | -0.63     | -0.12    | -0.88    | -3.33    | -6.70    | -5.19    | -4.30    | -0.92    | -5.68    | -5.91    | -1.67    | -9.69    |
| -0.14     | -1.02     | 0.35      | -0.23     | 0.92      | 0.73      | -1.18     | 0.10      | -1.08     | 0.10      | -1.49     | 1.07      | -2.34     | -2.14     | -3.23     | -1.96     | -2.04     | -0.99    | -0.12    | -2.62    | -4.25    | -2.34    | -3.68    | -1.30    | -3.97    | -3.50    | -0.96    | -4.60    |
| -0.72     | 0.59      | -0.36     | 0.74      | 0.64      | -0.94     | 0.51      | 0.30      | -0.11     | -0.86     | -1.05     | -1.58     | 0.12      | -1.90     | -0.12     | -0.17     | -0.19     | 0.82     | -1.04    | 0.28     | -0.17    | -0.08    | 0.06     | 0.10     | -1.19    | -0.20    | -0.50    | -0.61    |
| 1.23      | 0.40      | 0.06      | 1.43      | 1.19      | 0.42      | 0.45      | 0.58      | 0.84      | 1.09      | 0.92      | -0.39     | 1.32      | 0.30      | 0.14      | -0.34     | 0.35      | 0.93     | 2.00     | 0.62     | 0.50     | 1.39     | 2.07     | 1.67     | 0.81     | 0.72     | 1.34     | 0.73     |
| -0.59     | -0.29     | 0.36      | -0.49     | 0.61      | -0.81     | -1.03     | 0.12      | -0.17     | -0.46     | 0.57      | 0.09      | -0.73     | -0.46     | -0.04     | 0.38      | -0.43     | -0.33    | 0.31     | -0.81    | 0.22     | -0.56    | 0.04     | -0.03    | -1.21    | 0.27     | -0.60    | -0.52    |
| 2.15      | 0.23      | 0.43      | 0.92      | 1.78      | 1.69      | 1.55      | 2.43      | 1.19      | -0.21     | 1.85      | 0.42      | 0.99      | -0.02     | -0.38     | 0.65      | 1.71      | 0.46     | -0.79    | 0.88     | 0.91     | 0.34     | 0.25     | 0.54     | 0.72     | 0.63     | 1.47     | 0.35     |
| -1.13     | -1.71     | -1.24     | 0.17      | -0.37     | -0.03     | -0.50     | 0.19      | -0.32     | -0.41     | -0.50     | -1.56     | -1.17     | 0.10      | -0.26     | -1.01     | -0.26     | -0.20    | 0.22     | -0.77    | -1.41    | -1.06    | -1.48    | -0.43    | -1.25    | -1.04    | 0.26     | -0.76    |
| -0.70     | -0.28     | 0.12      | -0.37     | -0.44     | -0.26     | 0.06      | -0.01     | -0.19     | 0.04      | -0.44     | -0.83     | -0.43     | -0.78     | -0.06     | -0.60     | -0.04     | -0.85    | -0.31    | -0.29    | -0.19    | -0.36    | 0.56     | -0.23    | -0.08    | -0.59    | 0.16     | -0.03    |
| 0.00      | -0.70     | 1.03      | -0.17     | -0.40     | 0.12      | -0.92     | -0.31     | -0.46     | -0.42     | 0.19      | -0.43     | -0.05     | -0.19     | 0.54      | -0.23     | 1.26      | 0.28     | 0.31     | -0.36    | 0.47     | -1.20    | 0.30     | -0.23    | -0.30    | -1.12    | 1.39     | -1.08    |
| 0.39      | -0.36     | 1.29      | 0.62      | 0.68      | 1.38      | 0.83      | 1.44      | 0.96      | -0.06     | 0.54      | 1.35      | -1.17     | 0.16      | 0.23      | 0.09      | 0.60      | -0.16    | 0.12     | 2.04     | 1.41     | 1.63     | 1.80     | 1.69     | 0.77     | 0.88     | 0.06     | 1.08     |
| 0.51      | -0.16     | 0.26      | 0.69      | 0.52      | 1.14      | 0.03      | 1.08      | -0.38     | 2.00      | 1.18      | -0.04     | 1.17      | 0.59      | 1.50      | 0.99      | 1.00      | 1.01     | 0.63     | 0.81     | 0.79     | 0.94     | 2.40     | 0.24     | 0.65     | 1.04     | 1.66     | 1.26     |
| 1.79      | -0.06     | 0.96      | 1.16      | 0.27      | 0.53      | 0.49      | -1.16     | 0.42      | -1.32     | 1.42      | 0.95      | 0.52      | -0.50     | 3.01      | 0.81      | 1.59      | 0.82     | -0.82    | -1.44    | -0.97    | -1.99    | -0.56    | -1.42    | 0.83     | 0.23     | 0.20     | -0.56    |
| -0.35     | -1.53     | 1.30      | 1.43      | 0.76      | 0.30      | 0.64      | 0.92      | 1.07      | 0.75      | 0.87      | 2.05      | 0.83      | 0.66      | 0.01      | 1.11      | -0.30     | -1.13    | -0.45    | -0.58    | 0.05     | -1.84    | 0.92     | 0.20     | -0.15    | -0.69    | 1.89     | -2.01    |
| -1.10     | -1.04     | 1.72      | 2.85      | 1.56      | 1.20      | 1.20      | 0.72      | 1.70      | 1.33      | 1.01      | 1.52      | 1.91      | 0.70      | -0.21     | 1.49      | 1.86      | -1.08    | 1.31     | -0.44    | -2.32    | -4.40    | 0.07     | -1.14    | -1.95    | -1.57    | 0.90     | -3.92    |
| 0.12      | 0.84      | 2.03      | -0.69     | 0.93      | -0.74     | -0.71     | -0.87     | -0.63     | 0.88      | -0.47     | 0.21      | -1.74     | -0.87     | -0.85     | 1.16      | -1.65     | -0.66    | -0.84    | -0.74    | -0.37    | -2.27    | -2.42    | 1.14     | -2.30    | -0.41    | 0.01     | -1.26    |
| 0.50      | -0.67     | 1.42      | 0.54      | 0.62      | -0.14     | 0.35      | 1.66      | -0.59     | 0.32      | 1.32      | 0.37      | 0.57      | -0.69     | -0.57     | 0.88      | 0.34      | 0.01     | 0.50     | -0.95    | -1.55    | -1.81    | -1.65    | -0.60    | -2.43    | 0.52     | 0.87     | -0.94    |
| 0.18      | 0.55      | 0.10      | 0.63      | 0.85      | 0.25      | 0.53      | 1.83      | 0.93      | 0.27      | 0.76      | 0.96      | 0.79      | 0.09      | 0.42      | 0.18      | -0.46     | 0.28     | 0.43     | 0.26     | -1.15    | -2.88    | -0.66    | -1.28    | -2.58    | 0.49     | 0.35     | -1.45    |
| 0.21      | -0.09     | -0.08     | -2.19     | -2.64     | -1.48     | -1.43     | 0.49      | 0.58      | -1.55     | 1.61      | -1.02     | -0.06     | -1.34     | -1.63     | 1.38      | 1.01      | -0.03    | 0.28     | -0.76    | -1.33    | -0.84    | -0.16    | -0.93    | -1.76    | -1.48    | -0.01    | 0.23     |
| -0.71     | 0.07      | -0.05     | -0.13     | 2.23      | -0.85     | 0.18      | 0.78      | 0.09      | 0.87      | 0.84      | 0.86      | 1.32      | 0.94      | 0.25      | 0.82      | 0.53      | -0.84    | -0.23    | 0.24     | 0.73     | -0.17    | 1.13     | 1.22     | 1.00     | 0.82     | 0.30     | -1.50    |
| -0.11     | -0.26     | 0.21      | 0.61      | 0.04      | 0.45      | -0.34     | 0.21      | 0.74      | 0.19      | 0.12      | -0.03     | -0.40     | -0.28     | -0.34     | -1.00     | -0.51     | 0.21     | 0.42     | -0.46    | 0.31     | 0.40     | 1.79     | 0.11     | 0.62     | -0.32    | 0.39     | 0.19     |
| -0.60     | 0.70      | 0.61      | 0.96      | 2.02      | 1.93      | 1.52      | 0.29      | -0.52     | -0.22     | 0.47      | 0.70      | -0.16     | -0.08     | 1.36      | -0.01     | -0.19     | -1.17    | 0.81     | 0.43     | 0.09     | -0.04    | 2.44     | 0.66     | -0.34    | 1.01     | 0.28     | 1.64     |
| -1.00     | 0.32      | 0.32      | 0.25      | 1.00      | -0.25     | -1.29     | 0.72      | 0.55      | 0.22      | 0.39      | -0.45     | -0.60     | -0.40     | -3.69     | 0.73      | 1.35      | -0.69    | 0.15     | -0.04    | 0.63     | 0.01     | 1.45     | 0.92     | 0.30     | -0.22    | 0.32     | -0.51    |
| 0.61      | 0.72      | 0.68      | 0.70      | 0.97      | 1.19      | 0.99      | 2.02      | 0.70      | 2.01      | 0.79      | 0.53      | 1.34      | 1.11      | 0.27      | -0.17     | 0.00      | 0.58     | 0.25     | 0.15     | 0.34     | 1.36     | 0.92     | 0.90     | 0.63     | 0.01     | 0.83     | 0.47     |
| 1.82      | 1.56      | 1.35      | -0.12     | 1.09      | 2.06      | 0.82      | -1.19     | 1.24      | 3.03      | 0.85      | 1.17      | 0.38      | 1.19      | 1.85      | 1.28      | 0.13      | -0.54    | 0.56     | 1.46     | 0.09     | 2.31     | 1.42     | 0.94     | 2.87     | 0.02     | 2.31     | 1.44     |
| 0.52      | -0.57     | 1.05      | 0.43      | 0.22      | 0.48      | 0.45      | 0.08      | -0.18     | 0.34      | 0.78      | 0.43      | -0.01     | 1.06      | 0.86      | -0.28     | -1.01     | -0.11    | 0.26     | 0.93     | 0.41     | 1.45     | 1.81     | 1.86     | 0.81     | 0.59     | 0.43     | 0.74     |
| -0.15     | 0.39      | 0.58      | 0.86      | 0.90      | 0.55      | 1.11      | 0.67      | 0.91      | 0.36      | 0.21      | 0.73      | 0.79      | 0.01      | 0.76      | 0.23      | 0.61      | -0.18    | 0.75     | -0.28    | 1.01     | -0.01    | -0.08    | 0.04     | 0.66     | 0.47     | 1.24     | 1.02     |
| -1.18     | 1.54      | 0.39      | 0.33      | 0.97      | -0.68     | 0.28      | 0.60      | 1.86      | 1.14      | 1.06      | 0.80      | 0.78      | 0.33      | -0.59     | 0.53      | 0.21      | -0.37    | 0.15     | -0.55    | 0.03     | 2.01     | 1.59     | 0.30     | 1.37     | -1.02    | 1.41     | 0.82     |
| -0.46     | 0.27      | 1.55      | 0.61      | 0.97      | -0.49     | -1.63     | 1.25      | -0.08     | 0.52      | 0.26      | 0.18      | -1.21     | 0.12      | 0.09      | -0.90     | -0.54     | -1.12    | 0.57     | -0.10    | 0.83     | -0.96    | 0.78     | -1.11    | -0.06    | -0.52    | 0.48     | -1.36    |
| -0.42     | 0.50      | -1.10     | -0.44     | 0.43      | 0.57      | 0.74      | 0.48      | 0.21      | 0.41      | 0.01      | 0.20      | 0.83      | 0.22      | 0.41      | -0.63     | -0.24     | -0.43    | 0.91     | 0.27     | 0.74     | 0.40     | 1.50     | -0.01    | -0.13    | -0.78    | -0.42    | 1.13     |
| 0.65      | -0.38     | -0.27     | 0.42      | 1.47      | 0.61      | -0.03     | 1.22      | 1.61      | 0.10      | 1.14      | -0.62     | 0.39      | 0.11      | 1.25      | -0.63     | -1.01     | -0.35    | 0.92     | -0.13    | 1.71     | 1.70     | 0.75     | 1.14     | 0.95     | -0.53    | 1.91     | 1.45     |
| 1.06      | 0.24      | 0.11      | 0.31      | 1.35      | 0.18      | 0.48      | 0.73      | -0.50     | 0.52      | 0.21      | 0.72      | 0.10      | -1.29     | 0.55      | -0.94     | -0.77     | 0.33     | 0.08     | 1.16     | 1.54     | 1.41     | 0.66     | 0.37     | 0.68     | 0.59     | 1.02     | 1.45     |
| -0.16     | 0.06      | 0.52      | 0.00      | 0.14      | 0.74      | -0.41     | 0.50      | 0.43      | 0.28      | 0.26      | 0.20      | 0.82      | 0.40      | -0.04     | 0.37      | 0.56      | 0.40     | 0.01     | 0.31     | 0.03     | 1.34     | 2.05     | 1.25     | 0.88     | 0.04     | 0.36     | 0.98     |
| -0.67     | 0.25      | 1.04      | 0.35      | 2.10      | -1.64     | -0.14     | 0.25      | 0.32      | -0.45     | 0.02      | -0.34     | -0.61     | -0.97     | 0.72      | -1.28     | -0.37     | 0.51     | -0.68    | 0.13     | 0.26     | -0.18    | 1.61     | -0.27    | 0.86     | 1.18     | 0.32     | 1.53     |
| 0.52      | 0.16      | 0.55      | -0.23     | 2.96      | 1.48      | 0.69      | 0.50      | -0.69     | -0.51     | 1.26      | 1.53      | 1.48      | 0.88      | -0.44     | 0.69      | 0.12      |          |          |          |          |          |          |          |          |          |          |          |

|       |       |       |       |       |       |       |       |       |       |       |       |       |       |       |       |       |       |       |       |        |        |        |       |        |       |       |        |
|-------|-------|-------|-------|-------|-------|-------|-------|-------|-------|-------|-------|-------|-------|-------|-------|-------|-------|-------|-------|--------|--------|--------|-------|--------|-------|-------|--------|
| 0.79  | 0.16  | 0.71  | 0.32  | 0.71  | 0.74  | 0.61  | 0.94  | 0.93  | 1.36  | -0.26 | 0.73  | -0.78 | -0.88 | -2.30 | 0.63  | 1.24  | 0.39  | 0.37  | 0.46  | 0.32   | 1.20   | 1.56   | -0.17 | -0.46  | 0.19  | -0.77 | -2.06  |
| 1.24  | -0.49 | -0.29 | 0.20  | -0.16 | -0.23 | -0.41 | 1.32  | -0.50 | -0.30 | 0.29  | 0.23  | 0.71  | 0.02  | 0.79  | -0.25 | -0.35 | -0.32 | 0.06  | 0.42  | 0.70   | 0.37   | 1.14   | -0.03 | 1.16   | 0.53  | 0.39  | 1.00   |
| -1.21 | 1.53  | 0.27  | 2.05  | 0.91  | 0.53  | 0.55  | 0.54  | 1.50  | 0.81  | 1.41  | -0.24 | 1.02  | 2.92  | -1.32 | 1.45  | -0.19 | 0.02  | 1.00  | 1.56  | 0.84   | 0.43   | 0.77   | 1.09  | 1.17   | 0.62  | 1.44  | -0.01  |
| -0.28 | 0.52  | 1.28  | -0.12 | 1.67  | 0.20  | 0.75  | 0.23  | 0.21  | -0.16 | 1.53  | 0.06  | 1.60  | 0.95  | 0.69  | 1.03  | -0.62 | 0.04  | 0.68  | 1.12  | 0.03   | 0.90   | 1.13   | 1.85  | 2.05   | 0.73  | 0.36  | 2.10   |
| -0.24 | 0.41  | 0.23  | 0.47  | 1.64  | 0.98  | 0.88  | 0.09  | 0.28  | 0.71  | 0.17  | 0.38  | -0.17 | 0.01  | 0.56  | 0.38  | -0.02 | 0.34  | 0.38  | -0.15 | 0.60   | 0.74   | 1.67   | 1.11  | 0.64   | 0.33  | 0.30  | -0.21  |
| -0.26 | -2.44 | 1.92  | 0.41  | 1.32  | 0.89  | 0.36  | 1.01  | 0.30  | 0.90  | 1.19  | -0.07 | 0.48  | 1.61  | 0.21  | 0.44  | 0.01  | 0.09  | 0.30  | 1.42  | 0.40   | 0.92   | 0.97   | 1.54  | -1.37  | -0.57 | 1.12  | 0.56   |
| -1.26 | 0.62  | 1.22  | 0.17  | 1.58  | -0.09 | -0.19 | 1.95  | 0.48  | 1.32  | 1.31  | 1.01  | -1.30 | 0.37  | -1.26 | 0.37  | -0.61 | -0.74 | 0.14  | -0.16 | -0.96  | -0.90  | 1.50   | 0.30  | 1.34   | -1.03 | 1.23  | 1.55   |
| 0.48  | -0.03 | 0.81  | 0.88  | 2.03  | 0.76  | 1.38  | 0.51  | 0.98  | 0.61  | 0.13  | 0.57  | 0.58  | 0.37  | -0.49 | 0.61  | 0.56  | -0.07 | 0.63  | -0.29 | 0.39   | 0.47   | 0.74   | 0.08  | -1.49  | -0.83 | -0.48 | -0.31  |
| -0.47 | -0.76 | 1.46  | -0.82 | 0.66  | 1.95  | 0.45  | 0.02  | 2.00  | 0.39  | 2.27  | 0.08  | 0.19  | 3.33  | -0.68 | -0.43 | 1.27  | -1.10 | 1.62  | 1.55  | -1.97  | -3.30  | -0.90  | -1.60 | 0.19   | 0.04  | 0.54  | 0.13   |
| 0.15  | 1.02  | 1.94  | 1.32  | 2.19  | 0.65  | -0.44 | 0.74  | 0.53  | 1.21  | 0.66  | 0.34  | 0.21  | -0.19 | 0.16  | -1.08 | -0.94 | 1.04  | -0.87 | 1.08  | -0.94  | 1.02   | 0.78   | 0.33  | 1.05   | -1.14 | 0.01  | -0.96  |
| 0.30  | 0.41  | 1.01  | 0.24  | 1.68  | 0.09  | 1.35  | 0.39  | 1.06  | 0.06  | 0.34  | 0.06  | -0.14 | 0.03  | 1.09  | -0.23 | -0.51 | 0.01  | 1.06  | 0.98  | 1.51   | 3.13   | 2.64   | 1.38  | 1.98   | 1.02  | 1.06  | 1.85   |
| -1.29 | 1.89  | 0.91  | 0.72  | 1.98  | 0.02  | 3.60  | 0.93  | 0.38  | 2.96  | 2.89  | 2.06  | -1.68 | 0.06  | 1.57  | 0.06  | 0.02  | 2.70  | 1.19  | 2.89  | 3.06   | 0.79   | 2.98   | 0.53  | 2.36   | 1.74  | 0.14  | 0.50   |
| 1.25  | 0.74  | 5.26  | 2.83  | 0.92  | 4.57  | 3.12  | 5.34  | 2.99  | 6.10  | 2.30  | 3.07  | 5.25  | 2.89  | 2.23  | 5.23  | 1.03  | -0.13 | -1.73 | 0.49  | -3.44  | 0.37   | -6.27  | 0.49  | 0.57   | -0.10 | -0.26 | -0.59  |
| 1.15  | 0.13  | 4.63  | 5.16  | 4.83  | 5.48  | 3.23  | 7.74  | 6.10  | 7.03  | 2.32  | 3.66  | 8.18  | 3.48  | 0.75  | 6.93  | 3.56  | -2.57 | -0.46 | -3.79 | -5.13  | -9.23  | -1.88  | -4.38 | -3.56  | -5.59 | 0.83  | -2.75  |
| 0.37  | 0.15  | -0.87 | -1.46 | -4.91 | -1.34 | -0.90 | -2.04 | -1.50 | -1.11 | -3.57 | -2.03 | -0.63 | -2.39 | -6.08 | -1.64 | -2.18 | -1.27 | 1.25  | -0.94 | -5.34  | -5.22  | 7.46   | -3.33 | -1.84  | -3.87 | -1.63 | -1.21  |
| -4.04 | -0.90 | 4.50  | 4.03  | 7.03  | 5.48  | 1.61  | 4.68  | 4.29  | 5.70  | 1.70  | 2.15  | 2.35  | 3.44  | -0.27 | 1.70  | -0.09 | -1.90 | 1.19  | -8.36 | -14.00 | -11.12 | -11.86 | -3.29 | -10.81 | -8.67 | -0.20 | -15.90 |
| -0.56 | -1.62 | -0.50 | 0.01  | 1.59  | 0.91  | -1.26 | -1.10 | -1.70 | -0.60 | -2.11 | 0.18  | -3.84 | -2.87 | -5.77 | -2.88 | -2.53 | -3.54 | -0.01 | -5.81 | -8.43  | -5.11  | -7.01  | -3.88 | -7.32  | -6.97 | -1.65 | -7.42  |
| -0.24 | 0.61  | -0.66 | 0.03  | 0.68  | -1.30 | -0.37 | -0.99 | 0.00  | -1.98 | -0.52 | -0.90 | 0.15  | -2.31 | -0.29 | -0.65 | -1.11 | -0.44 | -1.37 | 0.26  | 0.74   | 0.14   | -0.44  | -0.43 | -1.18  | -0.39 | -0.53 | 0.37   |
| 1.34  | 2.11  | 1.41  | 1.94  | 2.48  | 1.99  | 2.52  | 1.79  | 1.44  | 2.10  | 1.25  | -0.61 | 0.79  | -0.16 | 1.28  | 0.66  | 1.75  | 2.39  | 2.38  | 2.73  | 0.84   | 2.16   | 1.86   | 2.07  | 2.04   | 2.19  | 1.94  | 1.28   |
| -1.21 | -0.64 | 0.19  | -0.08 | 2.13  | -1.15 | -0.41 | -0.37 | -0.07 | 0.41  | 0.63  | 0.06  | -1.08 | -0.02 | -1.00 | 0.08  | -1.05 | -0.92 | 0.32  | -1.66 | -0.73  | -0.90  | 0.03   | -1.04 | -1.04  | -0.55 | -0.81 | -0.18  |
| 2.58  | 0.61  | 0.58  | 1.05  | 1.78  | 2.14  | 2.02  | 2.33  | 2.52  | 1.70  | 2.73  | 0.57  | 2.45  | -0.07 | 0.86  | 0.27  | 1.93  | 0.00  | 1.10  | 1.31  | 0.99   | 0.73   | 0.05   | 0.76  | 0.62   | 0.04  | 1.11  | 1.18   |
| -2.11 | -2.62 | -1.59 | -0.47 | -0.13 | -0.78 | -0.54 | -1.20 | 0.41  | -0.43 | -0.74 | -1.68 | -0.74 | 0.12  | -0.21 | -1.30 | -1.04 | -1.24 | -0.56 | -0.89 | -2.17  | -1.24  | -1.50  | -2.79 | -2.49  | -2.70 | -0.63 | -0.41  |
| -1.30 | -1.54 | -0.28 | -0.73 | 0.79  | -0.26 | -0.02 | -0.06 | -0.50 | 0.01  | -0.84 | -0.75 | -0.13 | -0.99 | -0.36 | -0.13 | -0.80 | -1.08 | -1.27 | -0.44 | -0.85  | -1.17  | 0.76   | -0.33 | -0.92  | -1.11 | 0.32  | -0.63  |
| -0.89 | -0.16 | 0.76  | 1.17  | 1.12  | -1.23 | 0.00  | -1.07 | 1.54  | -0.89 | 1.01  | 0.16  | 0.16  | 1.93  | 0.36  | -0.15 | 0.98  | -0.35 | -0.30 | -1.03 | -1.03  | -1.57  | 1.35   | 2.24  | -1.24  | -1.43 | 1.38  | 0.92   |
| 1.40  | 0.58  | 1.81  | 2.02  | 1.29  | 2.21  | 0.41  | 1.63  | 1.43  | 0.37  | 0.52  | 0.94  | 0.05  | 0.26  | 1.48  | 0.71  | 1.46  | 0.53  | 0.80  | 2.86  | 0.07   | 4.39   | 2.78   | 1.71  | 2.19   | 2.09  | 0.52  | 3.31   |
| 0.62  | 0.76  | 0.25  | 0.37  | 1.08  | 0.02  | 1.51  | 1.20  | -0.64 | 1.92  | 1.06  | 0.37  | 1.48  | 1.24  | 1.86  | 1.19  | 0.86  | 1.37  | 1.21  | 0.96  | 2.37   | 1.97   | 3.14   | 0.64  | 1.24   | 0.31  | 1.83  | 2.29   |
| 1.23  | -0.19 | 0.90  | -0.12 | 1.22  | 0.39  | 0.66  | 2.41  | -1.72 | -0.97 | 0.41  | 0.60  | 0.54  | -0.46 | 1.93  | 0.90  | 0.14  | 1.13  | -0.81 | 0.03  | -0.14  | -1.26  | -0.03  | -1.33 | 0.47   | 0.35  | 0.46  | -0.12  |
| -0.90 | -1.54 | 2.22  | 5.00  | 3.07  | 1.47  | 1.76  | 3.25  | 2.50  | 2.10  | 2.10  | 4.15  | 4.09  | 1.82  | 1.21  | 2.14  | 1.79  | -0.86 | 1.57  | -0.90 | -1.75  | -5.11  | 0.90   | -0.27 | -0.03  | 0.94  | 1.42  | -2.33  |
| -1.72 | -4.32 | 4.32  | 6.54  | 4.41  | 3.66  | 1.82  | 2.93  | 3.57  | 3.75  | 3.46  | 5.76  | 5.35  | 3.46  | -0.02 | 4.88  | 4.14  | -2.02 | 1.40  | -0.80 | -4.55  | -8.56  | -0.27  | -1.08 | -3.89  | -2.74 | 2.64  | -5.44  |
| -0.27 | 2.79  | 1.39  | -2.12 | 0.61  | -1.58 | 0.30  | -2.57 | -0.70 | 0.53  | -1.36 | -1.38 | -2.62 | -1.56 | -2.85 | -2.89 | -1.61 | 0.25  | 2.29  | -2.44 | -3.02  | -4.66  | -3.13  | -0.96 | -3.89  | -0.93 | 1.12  | -2.20  |
| 0.32  | 0.00  | 0.69  | 0.95  | 2.31  | 1.28  | -0.67 | 0.65  | 1.41  | 0.98  | 1.83  | 0.94  | 1.16  | 0.08  | -0.41 | 2.40  | 0.66  | -0.82 | 0.86  | -0.29 | -2.28  | -4.83  | -2.26  | 0.02  | -3.68  | -0.29 | 1.14  | -1.70  |
| 0.61  | 0.57  | -0.18 | 0.90  | 1.14  | 0.27  | -0.88 | 2.43  | 1.06  | 1.28  | 1.50  | 1.41  | 1.50  | 1.22  | 0.03  | 1.26  | -0.94 | 0.00  | 0.67  | -1.24 | -2.18  | -6.37  | -2.39  | -1.26 | -4.50  | -0.01 | 0.30  | -2.49  |
| 1.18  | 0.95  | -1.44 | -1.15 | -0.88 | -1.11 | -2.28 | -2.03 | -1.77 | -1.70 | 0.40  | -2.53 | -1.54 | -2.54 | -1.21 | 0.32  | -1.01 | -0.76 | 2.53  | 0.07  | -1.82  | -2.45  | -1.20  | -1.45 | -2.30  | -1.45 | 0.03  | -0.13  |
| -0.54 | 0.03  | 1.05  | 1.38  | 3.09  | -0.12 | 1.19  | 1.21  | 1.12  | 0.65  | 1.62  | 0.57  | 0.08  | 1.09  | 0.57  | 1.68  | -0.52 | 0.10  | -0.06 | 0.39  | 0.61   | 0.22   | 0.75   | 1.02  | 0.57   | 1.52  | 0.02  | -0.48  |
| -0.81 | -0.10 | 0.41  | -0.01 | 1.00  | -0.01 | -0.04 | 0.01  | -0.05 | 0.61  | -0.27 | 0.17  | 0.25  | -0.08 | 0.23  | -1.21 | 0.42  | -0.06 | 0.31  | -0.04 | 0.26   | 0.13   | 0.57   | 0.39  | 0.75   | -0.14 | 0.40  | 0.81   |
| -1.14 | 0.40  | 0.91  | 0.26  | 3.16  | 1.25  | 1.73  | 1.34  | -1.10 | 0.67  | 0.57  | 1.18  | 0.29  | 0.76  | 1.02  | 1.73  | 0.50  | 0.23  | 2.17  | 2.24  | 0.02   | 0.92   | 2.15   | 0.76  | 0.92   | 1.09  | 0.13  | 2.14   |
| -0.55 | 1.26  | 0.24  | 1.08  | 2.04  | -0.40 | -0.85 | 0.71  | 1.83  | 0.84  | 0.10  | -0.80 | -0.23 | -0.29 | -5.78 | 1.37  | 1.26  | 0.29  | 0.61  | -0.46 | -0.11  | 1.00   | 2.33   | 1.14  | 0.67   | -0.86 | 0.08  | -0.07  |
| 0.98  | 1.32  | 1.44  | 0.64  | 1.95  | 0.81  | 1.59  | 0.50  | 1.22  | 2.06  | 0.48  | 0.67  | 1.21  | 0.94  | -0.45 | 0.72  | -0.32 | 1.01  | 0.74  | 1.49  | 0.76   | 1.21   | 1.23   | 0.94  | 0.87   | 0.66  | 2.00  | 0.42   |
| 2.21  | 2.91  | 1.51  | -0.01 | 2.25  | 2.39  | 1.99  | -1.10 | 2.06  | 0.96  | 1.49  | 0.61  | 0.70  | 1.29  | 4.17  | 0.49  | -0.23 | 0.67  | 1.98  | 2.42  | 0.30   | 1.79   | 2.02   | 0.88  | 3.14   | 0.36  | 0.93  | 2.32   |
| 0.19  | -0.23 | 0.50  | 1.12  | -0.12 | 1.59  | 0.83  | 0.99  | 0.02  | 0.38  | 1.82  | 0.26  | 1.29  | 0.25  | 0.91  | 0.37  | -0.27 | 0.48  | 0.80  | 1.43  | 0.90   | 2.06   | 1.69   | 2.27  | 1.42   | 1.67  | 0.40  | 1.81   |
| 0.50  | 1.14  | 1.36  | 1.32  | 1.70  | 0.29  | 1.75  | 0.81  | 1.58  | 1.16  | 0.76  | 0.83  | 0.97  | 1.26  | 0.93  | 0.50  | 0.84  | 0.52  | 1.66  | 0.47  | 1.16   | 0.72   | 1.40   | 0.57  | 0.73   | 0.61  | 0.93  | 1.94   |
| -1.05 | 1.49  | 1.56  | 0.16  | 2.44  | 0.90  | 0.57  | 0.62  | 1.14  | 1.95  | 2.23  | 1.33  | 1.65  | 0.86  | 0.44  | 0.69  | -0.19 | -0.01 | 1.15  | 0.44  | -0.06  | 2.02   | 0.80   | 0.77  | 1.24   | -0.27 | 1.96  | 1.78   |
| -0.33 | 0.40  | 0.87  | 0.61  | 1.43  | -0.72 | -0.93 | 1.17  | 0.76  | -0.58 | 0.66  | 0.81  | -1.03 | -1.10 | -0.28 | -1.20 | -2.81 | -0.80 | 1.26  | 0.46  | 0.48   | -0.44  | 0.32   | 0.50  | -0.82  | -2.75 | 1.17  | -1.03  |
| 0.07  | -0.10 | 0.32  | -0.55 | 0.61  | 0.28  | 0.94  | 1.45  | 0.55  | 1.01  | 0.01  | -0.01 | 0.96  | -0.29 | 0.10  | -0.09 | 0.49  | -0.79 | 0.27  | -0.48 | 0.84   | 1.62   | 2.69   | -0.65 | 0.55   | -0.91 | 0.08  | 1.44   |
| -0.39 | -1.30 | 1.57  | 1.56  | 2.14  | 0.73  | 0.21  | 0.66  | -0.52 | 0.44  | 0.56  | 1.26  | 0.37  | 0.58  | 1.63  | 1.75  | 0.46  | -0.92 | 1.88  | 2.19  | -0.22  | 3.34   | 2.59   | 2.21  | 2.46   | 2.04  | 5.56  | 1.78   |
| 1.64  | 1.38  | 0.73  | -0.97 | 1.84  | 0.35  | 0.59  | 0.89  | 0.57  | 1.32  | 1.19  | 1.10  | 0.94  | -0.44 | 0.80  | -0.98 | -1.03 | 0.63  | 1.31  | 1.91  | 3.01   | 2.52   | 1.17   | 0.62  | 0.83   | 0.93  | 2.83  | 1.01   |
| -0.40 | -0.72 | 1.10  | 0.15  | 0.84  | 1.20  | 0.61  | 0.77  | 0.92  | 1.29  | 0.16  | -0.07 | 1.21  | 0.06  | 0.32  | 0.68  | 0.48  | 0.05  | -0.57 | 1.39  | -0.06  | 1.69   | 2.75   | 0.79  | 1.81   | 0.13  | -0.08 | 1.90   |
| -1.68 | 0.67  | 0.88  | 0.65  | 2.83  | -0.92 | 0.07  | 1.10  | 0.95  | 0.29  | 0.11  | -0.29 | 0.92  | -0.68 | -0.07 | -0.83 | -0.28 | 0.45  | 0.45  | 0.53  | 0.24   | 0.50   | 1.49   | 0.17  | -0.99  | 0.63  | -0.32 | 1.43   |
| 0     |       |       |       |       |       |       |       |       |       |       |       |       |       |       |       |       |       |       |       |        |        |        |       |        |       |       |        |

|       |       |       |       |       |       |       |       |       |       |       |       |       |       |        |       |       |       |       |       |        |        |        |       |        |       |       |        |       |
|-------|-------|-------|-------|-------|-------|-------|-------|-------|-------|-------|-------|-------|-------|--------|-------|-------|-------|-------|-------|--------|--------|--------|-------|--------|-------|-------|--------|-------|
| 0.71  | -0.71 | 0.97  | 1.35  | 2.10  | 0.73  | 1.37  | 1.51  | 0.22  | 0.42  | 1.66  | -0.93 | 1.53  | 1.79  | 1.07   | 1.92  | 0.64  | 0.36  | 0.27  | 0.61  | 0.35   | 1.74   | 1.30   | 2.04  | 2.09   | 0.69  | 1.12  | 1.75   |       |
| -0.59 | -0.41 | 0.90  | 0.39  | 2.30  | 1.09  | 1.26  | 0.63  | 0.46  | 0.46  | 0.19  | 0.59  | 0.05  | -0.04 | 1.07   | 0.22  | 0.57  | 0.09  | 0.31  | 0.27  | 0.74   | 1.31   | 2.02   | 1.37  | 2.07   | 0.17  | 0.13  | 1.29   | 0.19  |
| 0.21  | -3.22 | 1.82  | 2.06  | 2.25  | 1.26  | 1.04  | 0.92  | 0.42  | 1.68  | 1.73  | 0.51  | 1.73  | 0.75  | 1.28   | 1.85  | 0.23  | 0.45  | 0.39  | -0.10 | 0.06   | 0.91   | 1.56   | 0.39  | 0.41   | 1.26  | 1.06  | -0.01  |       |
| -0.52 | 0.44  | 0.99  | 1.04  | 2.63  | 0.33  | -0.37 | 1.51  | 1.32  | 2.16  | 0.98  | 1.77  | -0.46 | 0.94  | -0.61  | 0.06  | 0.23  | -1.28 | -0.03 | -1.31 | -0.85  | -1.20  | 0.79   | 0.54  | 1.67   | -1.00 | 2.41  | 0.17   |       |
| -0.27 | -0.63 | 1.21  | 1.54  | 2.82  | 1.40  | 2.66  | 0.84  | 1.29  | 1.12  | 0.72  | 0.95  | -0.14 | 1.18  | -0.78  | 1.23  | 0.13  | 0.08  | 0.08  | 1.01  | 0.63   | 0.12   | 1.83   | 0.26  | -0.66  | -0.53 | -1.18 | -0.26  |       |
| 0.87  | -0.90 | 0.26  | 0.46  | 1.83  | 1.99  | -0.40 | 0.31  | 1.90  | 2.57  | 0.47  | 2.61  | 0.78  | 3.22  | -1.26  | 0.51  | 2.23  | -0.39 | 1.46  | -0.17 | -1.41  | -3.90  | -0.52  | -1.41 | -1.35  | -1.49 | 1.89  | -0.45  |       |
| -0.58 | 1.19  | 1.43  | 1.36  | 3.93  | 2.26  | 1.12  | 2.02  | 1.69  | 2.08  | 0.06  | 0.82  | -0.62 | -1.01 | -1.17  | -1.19 | -0.16 | -0.46 | -0.86 | 1.09  | -0.55  | 1.77   | 1.66   | 0.72  | 1.01   | 0.34  | 1.73  | -1.01  |       |
| 0.50  | 0.67  | 0.82  | 0.36  | 1.81  | 0.23  | 1.56  | 0.52  | 0.62  | 0.90  | 0.92  | -0.09 | -0.12 | 0.99  | 2.14   | 0.54  | -0.35 | 1.36  | 1.80  | 1.21  | 1.52   | 3.89   | 3.70   | 1.86  | 2.66   | 0.67  | 0.57  | 2.37   |       |
| -0.92 | 1.04  | 0.81  | 1.12  | 2.20  | 1.60  | 3.17  | 1.46  | 1.21  | 2.34  | 3.01  | 0.70  | -0.49 | 5.00  | 1.80   | -0.09 | 1.31  | 2.77  | 0.01  | 2.85  | 3.47   | 2.46   | 4.63   | 2.31  | 4.06   | 1.31  | -0.11 | 1.59   |       |
| 1.33  | 0.45  | 8.65  | 9.14  | 6.66  | 10.45 | 6.97  | 9.64  | 6.08  | 10.13 | 5.99  | 8.32  | 8.90  | 7.68  | 6.08   | 11.87 | 4.05  | -1.60 | -0.92 | -1.29 | -3.16  | 0.29   | -3.13  | 0.81  | 0.71   | -4.78 | 2.18  | 1.01   |       |
| 1.04  | 0.20  | 12.74 | 13.91 | 12.32 | 12.59 | 5.86  | 14.97 | 12.06 | 12.87 | 9.26  | 12.78 | 9.63  | 9.68  | 7.10   | 17.92 | 9.98  | -3.43 | -0.59 | -6.39 | -9.19  | -11.56 | -2.06  | -6.89 | -9.41  | -2.03 | 1.62  | -1.98  |       |
| 0.52  | 0.74  | 1.54  | -4.03 | -6.82 | -3.76 | -5.56 | -5.72 | -5.60 | -4.60 | -6.53 | -6.00 | -9.40 | -5.26 | -11.28 | -3.48 | -5.26 | -1.12 | 1.32  | -4.19 | -5.03  | -7.86  | 9.08   | -4.25 | -3.83  | -0.32 | -2.50 | 0.66   |       |
| -9.16 | -4.26 | 7.69  | 7.69  | 12.48 | 9.64  | 6.85  | 9.97  | 7.06  | 9.67  | 6.65  | 4.92  | 7.02  | 6.97  | 6.92   | 6.21  | 4.62  | -4.06 | 1.36  | -9.25 | -17.33 | -16.45 | -13.70 | -3.08 | -15.20 | -9.15 | 1.15  | -19.04 |       |
| -1.50 | -2.13 | -0.42 | 0.52  | 2.58  | -0.01 | -2.81 | -0.99 | -1.42 | -0.31 | -2.38 | -0.02 | -3.81 | -3.40 | -5.04  | -5.04 | -3.69 | -2.76 | -3.91 | -1.14 | -6.77  | -10.16 | -6.40  | -8.93 | -5.51  | -9.68 | -7.70 | -1.48  | -8.74 |
| -0.43 | 0.75  | -0.16 | -0.60 | 0.42  | -0.77 | 0.12  | -1.43 | -0.96 | -1.79 | -1.61 | -0.51 | 0.40  | -1.52 | 0.13   | -0.83 | -1.11 | -0.44 | -1.15 | 0.39  | 0.45   | -0.19  | -0.22  | -0.66 | -1.13  | -1.16 | -1.02 | 0.70   |       |
| 1.06  | 2.00  | 1.78  | 2.54  | 3.46  | 2.34  | 1.90  | 2.45  | 1.38  | 1.82  | 0.78  | -0.07 | 1.23  | 0.70  | 1.45   | 0.09  | 2.35  | 3.24  | 4.10  | 3.49  | 1.66   | 2.71   | 4.24   | 2.31  | 3.13   | 2.12  | 2.89  | 2.39   |       |
| -1.23 | -0.97 | -0.14 | 0.17  | 1.21  | -0.90 | -0.18 | 0.48  | -0.61 | 0.12  | 0.26  | 0.05  | -0.50 | 0.29  | 1.08   | 0.59  | -0.78 | -0.91 | -0.74 | -1.05 | -1.21  | -1.34  | -0.23  | -1.19 | -1.14  | 0.11  | -0.72 | -1.74  |       |
| 2.35  | 1.70  | 1.43  | 0.90  | 3.58  | 2.14  | 3.05  | 2.86  | 2.41  | 0.19  | 2.11  | 0.73  | 1.59  | -0.30 | 0.92   | 2.17  | 0.46  | 0.03  | -0.71 | 1.93  | 1.55   | 1.26   | 2.05   | 1.43  | 1.79   | 1.67  | 2.74  | 2.37   |       |
| -2.41 | -3.81 | -1.67 | -0.10 | 1.10  | -0.41 | -0.01 | -0.26 | 0.43  | -0.25 | -0.96 | -0.93 | -0.04 | -0.02 | 0.13   | 0.51  | -0.10 | -2.52 | -1.13 | -1.09 | -3.09  | -2.37  | -2.12  | -1.56 | -3.12  | -2.62 | 0.13  | -1.04  |       |
| -2.28 | -1.23 | -0.19 | -0.27 | 1.78  | -0.01 | 0.04  | 0.23  | 0.11  | 0.16  | -0.52 | 0.00  | -0.52 | -0.59 | 0.23   | 0.06  | 0.30  | -0.62 | -1.92 | -0.86 | -1.59  | -1.17  | 0.79   | -0.04 | -0.44  | -1.04 | 0.50  | -0.88  |       |
| -1.33 | -1.69 | 1.12  | 0.99  | 3.04  | -0.12 | -0.33 | 0.41  | 0.17  | -0.68 | 0.13  | 0.10  | 1.50  | 0.83  | 2.76   | -0.23 | 0.60  | -0.97 | 1.26  | 0.94  | 0.25   | -2.43  | 1.10   | -1.38 | -1.81  | -1.10 | 1.53  | 0.68   |       |
| 1.54  | 0.51  | 1.54  | 1.32  | 3.07  | 2.45  | 1.42  | 3.09  | 2.51  | 1.43  | 0.35  | 1.20  | 0.36  | 0.23  | 1.84   | 0.26  | 1.12  | 1.52  | 0.52  | 2.79  | 0.11   | 4.47   | 4.19   | 2.34  | 3.19   | 1.99  | 2.07  | 3.59   |       |
| 1.29  | 2.01  | 0.47  | 0.59  | 1.38  | 0.81  | 1.68  | 1.07  | -1.37 | 0.80  | 0.90  | 0.34  | 1.57  | 1.03  | 2.35   | 1.01  | 1.32  | 1.58  | 1.54  | 2.37  | 2.47   | 3.44   | 4.40   | 1.12  | 1.45   | 1.97  | 5.00  | 3.30   |       |
| 1.43  | 0.16  | 2.04  | 0.83  | 1.01  | 1.00  | 2.55  | 1.38  | -1.81 | 1.37  | 0.98  | 1.90  | 0.73  | -0.21 | 2.86   | 1.03  | 1.23  | 1.77  | -0.54 | -0.77 | -2.07  | -2.19  | 0.19   | -1.01 | 0.91   | -0.43 | -0.01 | -0.35  |       |
| -2.23 | -4.23 | 5.44  | 8.37  | 6.30  | 4.40  | 4.74  | 5.94  | 5.35  | 5.92  | 5.39  | 8.83  | 7.43  | 5.06  | 3.99   | 5.34  | 6.49  | -1.41 | 1.69  | -1.28 | -1.05  | -4.55  | 0.99   | 0.41  | 1.12   | -0.71 | 3.21  | -2.72  |       |
| -3.15 | -7.03 | 8.93  | 14.70 | 9.74  | 7.79  | 5.24  | 8.11  | 8.36  | 9.22  | 7.23  | 13.24 | 11.44 | 9.50  | 3.49   | 10.13 | 10.21 | -2.47 | 2.71  | -1.52 | -6.62  | -12.01 | -0.75  | -1.57 | -5.56  | -2.53 | 3.27  | -6.26  |       |
| -0.31 | 2.30  | -1.41 | -5.33 | -0.80 | -1.82 | -2.26 | -4.44 | -3.15 | -1.97 | -4.30 | -2.69 | -7.80 | -2.97 | -5.82  | -4.52 | -4.41 | -0.68 | -1.76 | -2.95 | -4.32  | -4.92  | -2.65  | -5.04 | -3.63  | 0.55  | -1.15 | -3.30  |       |
| 1.64  | -0.46 | 0.99  | 2.06  | 2.45  | 0.12  | 0.54  | 2.43  | 2.04  | 1.70  | 0.95  | 0.78  | 1.80  | 0.27  | -1.17  | 2.30  | 1.21  | -0.83 | 0.10  | -0.64 | -4.99  | -5.54  | -3.14  | -0.59 | -6.27  | -0.56 | 1.51  | -1.42  |       |
| 0.15  | 1.03  | 0.60  | 1.90  | 2.46  | -0.14 | -0.28 | 3.83  | 1.86  | 2.43  | 2.56  | 2.84  | 2.40  | 2.64  | -0.69  | 1.91  | 0.64  | -0.40 | 1.69  | -0.82 | -6.36  | -7.73  | -3.75  | -1.09 | -7.81  | 0.15  | 0.85  | -2.90  |       |
| 1.65  | 0.91  | -2.59 | -2.66 | -1.63 | -3.22 | -2.88 | -1.35 | -0.88 | -4.48 | 0.35  | -4.83 | -3.52 | -2.69 | -5.70  | -3.43 | -2.95 | -1.40 | 0.66  | -0.32 | -7.06  | -3.43  | -1.36  | -0.94 | -5.80  | -3.44 | 0.22  | -0.89  |       |
| -1.54 | -0.37 | 0.25  | 1.21  | 4.67  | 0.96  | 1.90  | 1.10  | 0.04  | 1.25  | 1.07  | 0.89  | -0.04 | 1.45  | 0.08   | 1.70  | 0.88  | -0.08 | 0.30  | 1.14  | 1.39   | 1.34   | 2.26   | 1.81  | 3.14   | 1.45  | 0.94  | -1.16  |       |
| -0.62 | -0.04 | 0.53  | 0.39  | 0.75  | -0.22 | -0.42 | 0.70  | 0.90  | 0.20  | -0.30 | -0.31 | -0.02 | 0.04  | 0.14   | -1.73 | 0.44  | -0.51 | 0.50  | 0.13  | -0.49  | -0.21  | 0.79   | 0.80  | 0.52   | 0.10  | 1.24  | 0.10   |       |
| -0.76 | 0.60  | 1.39  | 1.05  | 3.70  | 1.77  | 2.45  | 1.30  | -0.88 | 0.83  | 1.21  | 2.17  | 0.97  | 1.20  | 0.66   | 2.79  | 1.09  | 0.05  | 2.36  | 2.52  | 1.45   | 1.33   | 1.77   | 1.55  | 1.57   | 1.33  | 0.92  | 0.95   |       |
| -0.38 | 0.40  | 1.59  | 0.98  | 3.04  | 0.73  | -0.79 | 1.26  | 1.23  | 0.32  | 0.09  | -0.30 | -0.84 | -1.06 | -8.97  | 1.77  | 1.64  | -1.03 | -0.01 | 0.28  | -0.73  | 1.13   | 3.68   | 0.97  | 0.37   | -0.31 | 1.69  | -0.50  |       |
| 0.94  | 0.84  | 1.09  | 1.46  | 2.78  | 1.53  | 2.00  | 0.46  | 1.08  | 0.45  | 0.90  | 0.76  | 1.15  | 1.30  | -0.45  | 3.00  | 0.51  | 1.17  | 1.35  | 1.41  | 0.80   | 1.70   | 1.54   | 1.16  | 2.52   | 0.48  | 0.75  | 1.54   |       |
| 2.74  | 3.59  | 0.87  | 0.56  | 3.17  | 2.61  | 2.95  | -0.95 | 1.35  | 1.80  | 0.01  | 0.43  | 0.46  | 1.35  | 7.59   | 1.04  | -0.19 | 1.44  | 2.47  | 1.33  | -0.66  | 2.37   | 2.40   | -0.05 | 4.05   | 0.03  | 2.10  | 2.35   |       |
| 0.95  | 0.30  | 1.37  | 1.23  | 1.34  | 0.41  | 2.00  | 1.42  | -0.32 | 1.43  | 1.55  | 0.83  | 0.79  | 0.34  | 2.14   | 0.43  | 0.20  | 0.89  | 1.32  | 1.22  | 0.54   | 2.71   | 3.06   | 2.72  | 1.94   | 0.67  | 0.70  | 1.90   |       |
| 0.26  | 1.41  | 1.44  | 1.70  | 2.58  | 1.02  | 1.93  | 1.21  | 2.68  | 0.77  | 1.38  | 2.23  | 1.82  | 1.81  | 0.87   | 0.41  | 1.19  | 0.78  | 1.49  | 1.23  | 1.53   | 0.94   | 1.37   | 0.45  | 1.15   | 1.27  | 1.92  | 2.18   |       |
| -0.20 | 1.31  | 1.66  | 0.69  | 1.61  | 0.08  | 1.34  | 1.26  | 2.35  | 2.19  | 1.81  | 1.51  | 1.11  | 1.32  | 0.49   | 1.32  | 0.81  | 1.05  | 0.87  | 0.90  | 0.82   | 1.39   | 1.75   | 0.46  | 1.12   | 0.40  | 1.23  | 1.83   |       |
| -0.56 | -0.59 | 1.18  | 0.54  | 2.16  | -0.12 | -1.59 | 1.60  | 0.83  | -0.23 | -0.97 | 0.49  | -1.47 | -0.30 | -0.46  | -0.43 | -0.18 | -1.99 | 0.23  | -1.21 | -1.12  | -1.36  | 0.98   | 0.86  | 0.89   | -1.59 | -0.49 | -0.42  |       |
| -0.83 | 0.88  | -0.44 | -0.65 | 0.86  | 0.99  | 0.98  | 0.68  | 1.44  | 0.85  | 0.39  | -0.21 | -0.14 | -0.88 | -0.35  | -0.05 | 0.02  | -0.43 | 0.29  | 0.05  | 0.99   | 2.43   | 3.56   | -0.15 | 1.02   | -0.53 | 0.59  | 1.38   |       |
| -0.19 | 0.19  | 1.81  | 1.73  | 3.58  | 1.41  | 0.67  | 3.38  | 0.89  | 0.72  | 0.53  | 2.33  | 0.11  | 1.25  | 1.57   | 0.62  | 2.44  | -0.66 | 1.39  | 1.51  | 0.24   | 4.49   | 3.23   | 2.88  | 4.11   | 1.65  | 0.71  | 2.64   |       |
| 3.55  | 2.90  | -0.20 | -1.65 | 1.94  | -0.25 | 0.90  | 1.66  | 0.51  | 0.05  | -0.68 | -0.45 | -1.23 | -1.17 | 0.71   | -2.46 | -0.67 | 1.46  | 0.87  | 2.24  | 2.63   | 3.62   | 2.52   | 0.20  | 1.94   | 1.41  | 3.08  | 1.42   |       |
| -0.83 | -0.86 | 2.08  | 1.30  | 1.53  | 2.22  | 1.01  | 1.41  | 1.32  | 1.70  | 0.83  | 1.03  | 1.73  | 0.96  | -0.02  | 0.94  | 0.19  | 0.73  | 0.46  | 0.83  | 0.28   | 3.43   | 3.56   | 1.01  | 2.42   | 1.24  | 0.10  | 1.63   |       |
| -0.59 | -1.33 | 0.94  | 0.92  | 3.48  | -0.71 | 1.52  | 1.07  | 0.63  | 0.56  | -0.85 | -0.81 | 0.67  | 0.31  | -0.46  | 0.48  | -0.36 | 1.35  | -0.62 | -0.85 | -1.10  | 0.23   | 1.20   | 0.69  | 1.10   | 0.82  | -0.06 | 0.10   |       |
| -0.20 | -0.86 | 1.09  | 0.61  | 2.62  | 2.08  | -2.05 | 1.88  | 1.97  | 0.58  | 2.92  | 4.07  | 1.27  | 1.20  | -1.03  | 3.04  | 1.92  | -1.04 | 1.10  | -3.76 | -5.48  | -5.42  | -4.77  | -1.07 | -0.12  | -1.19 | 1.35  | -2.06  |       |
| 0.26  | 1.04  | 0.60  | 1.89  | 0.31  | 0.90  | -0.97 | 1.35  | 1.93  | 2.10  | 4.30  | 2.70  | 1.60  | 2.86  | -1.21  | 2.72  | 3.25  | -0.17 | 1.04  | -2.63 | -4.54  | -5.72  | -4.69  | -0.46 | -2.27  | 0.63  | 1.79  | -2.49  |       |
| -1.25 | -0.21 | -3.01 | -2.98 | -2.76 | -3.70 | -4.64 | -1.68 | -4.31 | -4.23 | -2.33 | -5.05 | -7.96 | -3.94 | -6.56  | -2.57 | -4.66 | -1.14 | 0.48  | -4.12 | -8.11  | -6.18  | -5.29  | -1.16 | -3.    |       |       |        |       |

|        |        |       |        |        |       |       |        |       |        |       |        |        |       |        |        |        |       |       |        |        |        |        |       |        |       |       |        |
|--------|--------|-------|--------|--------|-------|-------|--------|-------|--------|-------|--------|--------|-------|--------|--------|--------|-------|-------|--------|--------|--------|--------|-------|--------|-------|-------|--------|
| -1.08  | -0.60  | 1.16  | 1.63   | 2.89   | 1.52  | 1.62  | 2.77   | 0.54  | 1.90   | 1.32  | 1.36   | -1.05  | 0.88  | -0.41  | 0.44   | 0.25   | -1.04 | -0.54 | -0.61  | -1.46  | -1.60  | 1.48   | 0.79  | 1.39   | -0.54 | 1.24  | -0.93  |
| -0.62  | -0.37  | 1.86  | 0.83   | 3.60   | 1.14  | 2.31  | 1.22   | 0.99  | 1.45   | 1.01  | 0.38   | 0.47   | 0.78  | -0.88  | 1.52   | 0.37   | -0.31 | 0.68  | 0.12   | 0.56   | 0.22   | 1.89   | 0.24  | -1.08  | -0.54 | 0.78  | 0.42   |
| -0.16  | 0.84   | 1.44  | 0.88   | 1.75   | 2.64  | 1.81  | 1.49   | 2.58  | 2.04   | 1.01  | 2.29   | 1.23   | 0.79  | -2.91  | 0.68   | 2.49   | -1.67 | 1.57  | 0.71   | -1.38  | -4.57  | -2.17  | -0.69 | -1.28  | -0.27 | 2.19  | -2.58  |
| -0.81  | -0.87  | 1.75  | 1.44   | 3.66   | 1.10  | 0.08  | 2.34   | 1.59  | 1.69   | 0.23  | 0.01   | 0.18   | -0.63 | -1.87  | -0.34  | -0.21  | -0.30 | -0.56 | 1.64   | -0.54  | 0.80   | 2.56   | 0.50  | 0.79   | 0.50  | 1.56  | -0.38  |
| 1.74   | 1.17   | 1.05  | 0.39   | 2.54   | 0.33  | 2.81  | 0.40   | 0.50  | 0.56   | 1.04  | 0.35   | -0.23  | 0.23  | 0.69   | 0.24   | -0.80  | 1.70  | 1.82  | 1.48   | 1.56   | 4.08   | 4.65   | 2.25  | 3.58   | 0.85  | 1.11  | 3.24   |
| -1.50  | 0.48   | 1.90  | 0.80   | 2.83   | 1.12  | 5.09  | 1.70   | 1.98  | 3.50   | 3.71  | 2.74   | 0.10   | -0.58 | 3.62   | 1.69   | 1.76   | 2.82  | 0.61  | 4.06   | 3.36   | 3.57   | 3.27   | 1.61  | 3.94   | 2.40  | 0.03  | 3.03   |
| 1.45   | -0.14  | 16.03 | 23.18  | 15.79  | 18.08 | 12.54 | 19.90  | 13.77 | 17.74  | 12.28 | 18.73  | 18.05  | 14.37 | 13.84  | 21.33  | 9.90   | -0.44 | 0.02  | -0.59  | -2.90  | 1.45   | -5.16  | 0.87  | 0.97   | -3.14 | 3.76  | 2.10   |
| 1.73   | 0.13   | 24.72 | 40.05  | 27.83  | 29.63 | 14.48 | 31.82  | 26.41 | 27.62  | 22.57 | 29.29  | 27.57  | 23.91 | 21.37  | 35.86  | 19.81  | -4.64 | -0.28 | -2.53  | -9.85  | -10.72 | -5.13  | -5.25 | -7.12  | -0.54 | 4.10  | 1.64   |
| 1.24   | 0.06   | -4.89 | -13.11 | -13.11 | -5.68 | -7.24 | -11.76 | -8.09 | -9.88  | -8.99 | -19.07 | -15.79 | -9.59 | -17.74 | -12.52 | -8.77  | -3.44 | 0.47  | -4.32  | -6.81  | -6.66  | 4.17   | -5.81 | -5.49  | -0.32 | -3.56 | 0.15   |
| -14.67 | -7.80  | 11.89 | 10.65  | 16.91  | 14.61 | 14.09 | 15.22  | 13.01 | 13.13  | 11.54 | 7.16   | 11.93  | 12.21 | 15.00  | 12.23  | 8.33   | -2.82 | 1.72  | -10.26 | -19.80 | -20.48 | -15.68 | -3.23 | -15.82 | -9.54 | 2.79  | -19.18 |
| -3.48  | -2.91  | -0.25 | 1.39   | 3.72   | 1.01  | -1.59 | -0.93  | -1.05 | -0.32  | -2.01 | 1.08   | -3.88  | -2.65 | -4.89  | -1.16  | -3.36  | -4.85 | -1.23 | -5.53  | -10.53 | -9.84  | -9.92  | -7.09 | -10.77 | -8.06 | -1.55 | -7.37  |
| -0.44  | -0.09  | -0.48 | -0.68  | 0.85   | -0.70 | 0.26  | -1.99  | -0.21 | -1.87  | -1.29 | -1.63  | 0.39   | -1.82 | 0.54   | -0.54  | -1.18  | 0.13  | -1.29 | 0.57   | 0.79   | -1.13  | -0.49  | -0.30 | -1.44  | -0.34 | 0.64  | 0.32   |
| 1.15   | 1.72   | 2.73  | 2.51   | 3.81   | 2.56  | 1.93  | 1.39   | 1.31  | 1.61   | 1.42  | 1.16   | 1.21   | 0.75  | 0.50   | 1.38   | 1.46   | 3.66  | 4.22  | 3.08   | 2.92   | 4.90   | 4.02   | 3.58  | 3.39   | 2.54  | 2.53  | 2.69   |
| -1.08  | -0.94  | 0.07  | 0.65   | 2.38   | -0.21 | 0.08  | 0.30   | -0.26 | -0.13  | 1.07  | -0.19  | -0.35  | 0.08  | -1.01  | 0.44   | -0.89  | -1.18 | -0.53 | -1.36  | -1.66  | -0.96  | 0.10   | -0.95 | -2.15  | 0.08  | 0.14  | -1.03  |
| 3.05   | 3.03   | 1.37  | 1.62   | 3.90   | 1.63  | 1.90  | 2.90   | 1.84  | 1.25   | 1.00  | 2.21   | 0.95   | 1.05  | 0.15   | 0.64   | 0.52   | 0.57  | 0.22  | 2.50   | 2.16   | 0.26   | 2.53   | 2.55  | 1.44   | 2.06  | 3.32  | 1.63   |
| -3.83  | -4.21  | -1.36 | 1.22   | 1.39   | 0.07  | 0.46  | 1.35   | 1.64  | 0.77   | 0.42  | -0.60  | 1.03   | 0.42  | -0.10  | 0.75   | 0.59   | -2.27 | -1.22 | -0.55  | -3.48  | -3.07  | -1.90  | -1.41 | -2.98  | -2.70 | -0.53 | -2.27  |
| -2.45  | -2.19  | 0.12  | 0.55   | 2.15   | 0.56  | 0.58  | 0.92   | 0.40  | 1.74   | 0.26  | 0.22   | 1.23   | -0.22 | 1.83   | 1.82   | 0.54   | -1.14 | -1.86 | -0.25  | -2.13  | -1.69  | 0.71   | -1.00 | -1.27  | -1.21 | 0.58  | -1.26  |
| -1.46  | -0.71  | 1.06  | 1.35   | 3.54   | 1.10  | 0.09  | 0.45   | 0.90  | 0.77   | 1.01  | 0.54   | 1.62   | 1.96  | 1.59   | 1.43   | 1.25   | -1.18 | 1.01  | 0.68   | -0.34  | -1.38  | 0.68   | -0.62 | -0.87  | -0.31 | 2.01  | -0.10  |
| 1.06   | 0.93   | 1.94  | 1.98   | 3.99   | 3.37  | 2.59  | 2.54   | 1.82  | 1.43   | 1.85  | 1.43   | 0.54   | 1.40  | -0.03  | 1.34   | 1.72   | 2.34  | 0.04  | 4.72   | 1.32   | 5.06   | 3.90   | 2.27  | 3.49   | 3.53  | 2.28  | 3.80   |
| 2.97   | 2.60   | 0.41  | 0.83   | 0.79   | -0.06 | 1.45  | 0.80   | -0.96 | 0.73   | -0.03 | 0.06   | 0.88   | 0.19  | -0.59  | 0.50   | 0.55   | 1.87  | 1.90  | 2.66   | 2.19   | 3.84   | 4.14   | 1.26  | 2.00   | 2.40  | 1.21  | 3.28   |
| 1.49   | -1.22  | 1.85  | 3.02   | 1.66   | 0.89  | 2.58  | 2.77   | -0.75 | 0.74   | 1.26  | 2.30   | 0.66   | 0.28  | 0.72   | 2.86   | 1.36   | 1.21  | 0.03  | 0.65   | -0.86  | -1.81  | 0.17   | -1.17 | 0.85   | 0.47  | -0.71 | -1.68  |
| -4.06  | -6.81  | 8.37  | 16.14  | 11.28  | 8.73  | 5.49  | 11.89  | 9.65  | 10.83  | 10.85 | 17.03  | 15.52  | 10.49 | 8.03   | 12.87  | 11.55  | -0.30 | 1.80  | 0.69   | -1.76  | -6.30  | 2.29   | 0.70  | 0.90   | -0.49 | 4.38  | -2.09  |
| -4.54  | -11.57 | 16.31 | 27.06  | 17.32  | 14.91 | 11.34 | 16.13  | 17.08 | 18.40  | 16.64 | 23.14  | 24.54  | 18.15 | 10.91  | 20.68  | 20.45  | -2.50 | 3.86  | -1.88  | -6.73  | -14.15 | -1.00  | -1.04 | -6.41  | -1.61 | 4.85  | -7.16  |
| 3.54   | 5.09   | -2.86 | -9.82  | -3.60  | -5.65 | -4.46 | -6.31  | -6.04 | -6.31  | -8.48 | -7.48  | -12.80 | -7.30 | -8.74  | -8.73  | -7.13  | -1.03 | -1.22 | -3.86  | -4.69  | -6.98  | -1.88  | -1.58 | -4.11  | -0.54 | -0.54 | -3.29  |
| 0.60   | 0.40   | 1.66  | 3.33   | 3.47   | 1.18  | -0.23 | 2.24   | 2.21  | 1.41   | 2.40  | 2.68   | 2.82   | 0.17  | -1.66  | 2.09   | 1.23   | -0.02 | 0.63  | -0.75  | -3.41  | -6.37  | -3.32  | -1.78 | -6.00  | -0.09 | 1.84  | -2.31  |
| 0.70   | 1.27   | 1.78  | 4.52   | 4.42   | 0.58  | -0.37 | 5.19   | 3.25  | 3.98   | 3.69  | 5.75   | 5.16   | 2.53  | -0.38  | 4.52   | 1.41   | -0.95 | 1.71  | -0.69  | -5.92  | -9.85  | -4.29  | -1.43 | -7.99  | 1.10  | 1.88  | -2.79  |
| 0.41   | -0.55  | -5.74 | -9.03  | -3.68  | -6.73 | -5.34 | -6.87  | -4.96 | -9.91  | -4.47 | -11.37 | -9.25  | -6.97 | -9.75  | -6.64  | -8.27  | -1.11 | 0.93  | -0.28  | -4.76  | -4.13  | -3.11  | -1.52 | -6.11  | -3.13 | -0.13 | -1.82  |
| -2.84  | -0.91  | 0.02  | 1.54   | 4.63   | 0.83  | 1.81  | 1.71   | 0.70  | 2.03   | 0.95  | 1.64   | 0.42   | 1.51  | 0.83   | 0.81   | -0.27  | 0.19  | 0.99  | 0.53   | 1.27   | 1.13   | 3.46   | 1.65  | 2.19   | 0.99  | 0.74  | -1.68  |
| -0.01  | 0.16   | 0.54  | 0.41   | 1.62   | 0.28  | -0.17 | 0.70   | 0.83  | 0.17   | -0.42 | 0.43   | 0.04   | -0.17 | -0.70  | -0.87  | -0.01  | -0.42 | 0.08  | 0.54   | 0.01   | 0.11   | 1.40   | 0.41  | 1.23   | 0.93  | 0.94  | 1.12   |
| -1.26  | -0.29  | 1.98  | 1.43   | 4.94   | 2.37  | 2.72  | 2.19   | -0.43 | 0.68   | 1.04  | 2.35   | 2.33   | 0.41  | 2.97   | 2.04   | 0.79   | -0.42 | 3.14  | 2.36   | 1.45   | 0.27   | 2.57   | 0.89  | 2.04   | 2.41  | 0.63  | 1.34   |
| -0.28  | 2.09   | 1.37  | 1.66   | 3.49   | 1.16  | -0.20 | 1.18   | 2.63  | 1.74   | 0.38  | 0.20   | -0.52  | 0.44  | -9.54  | 2.16   | 1.84   | -0.96 | 0.05  | 0.04   | 0.70   | 1.15   | 2.53   | 0.50  | 1.01   | -0.81 | 1.45  | -0.88  |
| 0.85   | 1.81   | 1.94  | 1.61   | 3.81   | 1.16  | 2.03  | 0.80   | 0.66  | 1.21   | 0.81  | -0.28  | 1.26   | 0.83  | -1.19  | -0.34  | -0.44  | 1.87  | 0.91  | 2.24   | 0.55   | 1.91   | 2.27   | 0.17  | 1.27   | 1.28  | 0.36  | 1.00   |
| 3.15   | 2.40   | 0.83  | 1.27   | 3.23   | 3.11  | 1.12  | 0.03   | 1.65  | 2.79   | 0.78  | -0.62  | 0.18   | 1.86  | 11.61  | 0.06   | 0.75   | 1.55  | 2.22  | 2.46   | 0.39   | 2.06   | 2.80   | 0.52  | 5.09   | 0.30  | 4.49  | 1.00   |
| 1.38   | -0.30  | 0.77  | 1.37   | 0.70   | 1.14  | 1.79  | 1.78   | -0.32 | 0.92   | 1.11  | 1.24   | 1.00   | 1.80  | 0.61   | 0.20   | -0.28  | 1.48  | 1.72  | 2.26   | 1.23   | 2.86   | 2.67   | 2.81  | 2.61   | 1.13  | 1.40  | 2.72   |
| -0.03  | 1.88   | 1.39  | 1.57   | 2.77   | 1.30  | 2.30  | 1.11   | 3.03  | 0.98   | 1.69  | 1.70   | 1.73   | 0.86  | 1.47   | 0.71   | 1.26   | 0.53  | 1.75  | 1.09   | 1.80   | 1.56   | 2.60   | 1.04  | 1.99   | 1.42  | 2.40  | 3.10   |
| -0.10  | 2.56   | 1.34  | 1.28   | 3.66   | 0.51  | 1.00  | 0.84   | 1.58  | 2.18   | 0.85  | 1.86   | 1.50   | 1.18  | 1.79   | 0.83   | 0.48   | 1.19  | 1.39  | 2.10   | 1.03   | 2.48   | 1.96   | 1.72  | 2.12   | 0.68  | 2.77  | 3.24   |
| -1.15  | -1.17  | 0.20  | 0.34   | 2.37   | -1.14 | -0.19 | 2.18   | 0.62  | 0.78   | 0.53  | 0.53   | -1.38  | -0.63 | -0.34  | -1.57  | -1.27  | -1.99 | 0.41  | -0.11  | -1.31  | -2.23  | 2.83   | 1.01  | 1.03   | -1.82 | 0.66  | -0.97  |
| -0.03  | 1.16   | -0.49 | -1.66  | 1.14   | -0.23 | 0.81  | 0.52   | 0.87  | -0.06  | -0.58 | -0.88  | -1.00  | -1.44 | -1.34  | -0.56  | -0.94  | 0.64  | 0.58  | -0.41  | 0.54   | 1.34   | 3.03   | 0.25  | 1.17   | 0.34  | 1.23  | 1.66   |
| 0.31   | -0.57  | 1.86  | 3.45   | 6.31   | 1.13  | 1.19  | 2.99   | 1.66  | 1.53   | 1.70  | 2.05   | 0.39   | 2.81  | 2.32   | 2.26   | 0.90   | -0.54 | 1.92  | 2.64   | 1.30   | 4.22   | 5.26   | 1.63  | 3.64   | 2.52  | 1.44  | 3.06   |
| 5.58   | 4.90   | -1.03 | -2.12  | 0.88   | -0.62 | 0.30  | 0.09   | 0.48  | -0.51  | -2.63 | -1.31  | -2.28  | -2.54 | -1.23  | -2.86  | -3.02  | 1.53  | 2.46  | 2.23   | 2.18   | 3.52   | 3.01   | 0.17  | 1.85   | 1.15  | 2.14  | 2.07   |
| -1.74  | -1.59  | 2.06  | 1.27   | 2.70   | 1.72  | 2.01  | 1.89   | 1.13  | 1.85   | 2.36  | 1.14   | 2.12   | 1.24  | 0.73   | 2.05   | 1.10   | 0.87  | -0.19 | 1.76   | 0.15   | 3.68   | 3.83   | 1.14  | 2.67   | 1.61  | 1.25  | 1.49   |
| -1.95  | -0.51  | 0.40  | 0.28   | 2.82   | 0.18  | 1.32  | 0.92   | 0.82  | 1.84   | 0.23  | 0.37   | 0.17   | 0.48  | -0.17  | 0.08   | 1.41   | 1.06  | -0.36 | 0.64   | -0.81  | 1.78   | 2.22   | 0.08  | 0.10   | 0.38  | 0.24  | 1.32   |
| -0.09  | 0.28   | 2.80  | 2.72   | 4.16   | 3.01  | -1.16 | 2.83   | 2.59  | 1.43   | 4.79  | 6.83   | 3.21   | 2.03  | -1.17  | 2.78   | 3.18   | -2.75 | 1.04  | -4.14  | -6.17  | -8.68  | -5.09  | -1.33 | -1.69  | -0.21 | 1.91  | -2.37  |
| 0.34   | 0.52   | 2.15  | 4.11   | 1.92   | 2.73  | -0.94 | 3.01   | 3.51  | 3.32   | 6.56  | 6.00   | 2.96   | 4.18  | -0.50  | 3.36   | 4.67   | -0.63 | 0.67  | -3.37  | -4.93  | -9.81  | -6.34  | -0.24 | -3.52  | 0.43  | 2.22  | -3.03  |
| -1.41  | 0.01   | -4.56 | -10.58 | -5.26  | -6.80 | -9.20 | -6.37  | -7.99 | -10.49 | -7.95 | -14.41 | -12.86 | -8.61 | -11.49 | -9.94  | -10.20 | -2.73 | 1.04  | -5.28  | -8.75  | -10.90 | -7.26  | -1.66 | -5.39  | -3.45 | -1.12 | -5.29  |
| -0.98  | -0.35  | -2.31 | -3.43  | 0.61   | -2.37 | -1.91 | -1.41  | -2.41 | -2.99  | -3.62 | -8.05  | -2.79  | -2.19 | -4.37  | -3.57  | -3.27  | 2.33  | 2.83  | 2.09   | 2.39   | 2.85   | 2.25   | 0.68  | 2.64   | 1.86  | 0.88  | 1.07   |
| -1.29  | -1.76  | -4.13 | -6.46  | -3.20  | -3.54 | -3.99 | -5.31  | -4.17 | -7.25  | -4.77 | -12.27 | -4.24  | -6.58 | -5.89  | -6.63  | -6.57  | 3.30  | 4.28  | 3.06   | 4.85   | 4.93   | 5.30   | 2.72  | 4.00   | 4.39  | 3.70  | 5.37   |
| -0.49  | 1.14   | 0.70  | 1.43   | 1.99   | 0.77  | -1.10 | 3.31   | 0.49  | 1.65   | 0.92  | 2.57   | 0.11   | 0.59  | 0.50   | 2.13   | 2.43   | 1.79  | 0.87  |        |        |        |        |       |        |       |       |        |



|        |        |        |        |        |        |        |        |        |        |        |        |        |        |        |        |        |       |       |       |        |        |        |       |        |       |       |        |       |
|--------|--------|--------|--------|--------|--------|--------|--------|--------|--------|--------|--------|--------|--------|--------|--------|--------|-------|-------|-------|--------|--------|--------|-------|--------|-------|-------|--------|-------|
| 0.55   | -1.08  | 1.83   | 2.37   | 4.01   | 1.43   | 0.65   | 1.43   | 1.97   | 2.04   | 1.09   | 0.47   | 0.30   | -0.67  | -1.25  | 0.27   | 0.03   | 0.97  | -0.74 | 1.85  | 0.03   | 0.19   | 2.65   | 0.90  | 0.91   | 0.00  | 2.37  | -0.24  |       |
| 1.24   | 1.23   | 0.17   | -0.26  | 1.56   | 0.42   | 1.90   | -0.58  | -0.50  | -0.33  | -0.34  | -0.43  | -0.39  | -0.36  | 0.84   | -1.36  | -1.81  | 2.03  | 2.07  | 2.34  | 2.70   | 4.48   | 4.65   | 2.32  | 3.90   | 0.85  | 0.86  | 3.19   |       |
| -1.01  | 0.40   | 1.26   | 2.44   | 4.38   | 1.99   | 4.27   | 2.15   | 2.60   | 2.94   | 4.50   | 2.16   | 0.17   | -0.61  | 3.50   | 2.51   | 0.59   | 4.21  | 2.12  | 4.60  | 3.56   | 3.35   | 4.25   | 1.87  | 4.18   | 2.49  | 0.18  | 3.18   |       |
| 1.99   | 1.37   | 26.71  | 34.67  | 28.65  | 27.88  | 18.72  | 32.03  | 24.55  | 30.10  | 23.71  | 30.03  | 28.81  | 28.12  | 23.49  | 36.86  | 18.30  | 0.79  | 1.49  | 1.21  | -3.20  | 2.42   | -1.69  | 4.11  | 2.99   | -1.89 | 4.25  | 4.46   |       |
| 2.81   | 1.22   | 48.60  | 65.77  | 55.35  | 50.87  | 28.19  | 62.01  | 51.27  | 54.41  | 43.94  | 53.48  | 50.52  | 54.16  | 45.97  | 68.48  | 40.65  | -1.63 | 2.34  | -1.62 | -8.97  | -8.57  | -0.98  | -2.13 | -5.43  | 0.18  | 7.80  | 4.63   |       |
| 0.70   | -0.63  | -8.86  | -19.19 | -21.49 | -13.76 | -14.29 | -19.64 | -15.85 | -16.75 | -16.40 | -17.17 | -20.58 | -20.03 | -23.08 | -19.53 | -16.93 | 0.22  | 0.60  | -6.83 | -6.56  | -6.03  | 7.68   | -5.99 | -7.34  | -1.83 | -5.22 | -1.61  |       |
| -22.94 | -12.80 | 15.99  | 11.21  | 22.34  | 20.28  | 22.81  | 17.66  | 14.99  | 17.09  | 13.35  | 7.38   | 14.80  | 16.63  | 22.33  | 15.91  | 10.46  | -2.36 | 3.37  | -5.71 | -20.07 | -20.96 | -14.46 | -1.57 | -15.02 | -8.74 | 3.63  | -14.70 |       |
| -5.99  | -3.92  | -0.06  | 1.51   | 3.90   | 0.79   | -1.20  | -1.51  | -0.53  | -0.26  | -2.06  | 2.41   | -3.95  | -2.64  | -4.29  | -4.02  | -3.29  | -4.93 | -0.23 | -5.68 | -10.60 | -10.83 | -10.41 | -7.06 | -11.45 | -9.01 | -0.85 | -6.73  |       |
| -0.32  | -0.03  | 0.20   | -0.74  | 0.01   | -0.59  | -0.13  | -0.96  | 0.27   | -1.66  | -1.65  | -3.35  | 0.81   | -1.46  | -0.12  | -0.82  | -1.43  | 0.42  | -1.43 | 0.26  | 1.02   | -1.05  | -0.23  | -0.50 | -1.70  | -0.58 | 0.39  | 0.22   |       |
| 2.61   | 3.46   | 1.25   | 2.77   | 4.11   | 1.67   | 1.78   | 0.85   | 1.18   | 2.61   | 0.89   | 0.23   | 0.99   | 0.28   | 0.51   | -0.34  | -0.42  | 3.63  | 4.21  | 3.14  | 2.75   | 2.70   | 3.99   | 2.58  | 4.06   | 2.48  | 2.94  | 3.74   |       |
| -2.07  | -1.72  | 0.23   | 0.40   | 3.06   | -0.13  | -0.48  | 0.25   | -0.24  | 1.03   | 1.02   | 0.22   | -0.72  | 0.70   | -1.48  | 1.12   | -0.67  | -0.77 | -0.36 | 0.02  | -1.67  | -1.71  | -1.02  | -1.07 | -2.01  | -0.44 | 1.14  | -1.42  |       |
| 3.10   | 2.64   | 2.50   | 1.57   | 3.67   | 2.12   | 1.83   | 2.51   | 1.90   | 0.54   | -0.34  | 2.45   | 1.40   | 0.39   | 0.14   | 0.48   | 1.63   | 2.50  | 0.11  | 1.76  | 2.57   | 2.01   | 3.21   | 3.43  | 2.20   | 2.57  | 3.11  | 2.65   |       |
| -3.62  | -5.39  | 0.23   | 2.16   | 3.53   | 2.01   | 0.93   | 3.20   | 2.11   | 2.98   | 1.41   | 1.43   | 2.41   | 2.97   | 3.28   | 3.64   | 2.62   | -3.36 | -0.94 | -2.28 | -3.59  | -3.90  | -2.31  | -1.43 | -3.33  | -3.03 | -1.55 | -1.03  |       |
| -3.07  | -2.72  | 1.52   | 2.20   | 4.34   | 2.17   | 2.01   | 2.62   | 1.71   | 3.30   | 1.19   | 2.19   | 2.68   | 2.65   | 3.19   | 3.30   | 1.94   | -1.34 | -1.58 | 0.18  | -2.08  | -2.17  | 0.21   | -0.99 | -1.83  | -1.56 | -0.19 | 0.54   |       |
| -2.06  | -1.00  | 2.52   | 1.95   | 2.83   | 1.71   | 0.57   | 2.03   | 1.56   | 1.49   | 2.05   | 2.57   | 1.92   | 3.55   | 2.77   | 1.74   | 2.61   | -1.68 | 1.25  | -0.07 | -0.82  | -1.15  | -0.24  | -1.10 | -1.19  | -0.82 | 2.19  | 1.54   |       |
| 1.83   | 0.57   | 3.28   | 3.32   | 4.64   | 3.12   | 3.41   | 3.52   | 3.10   | 2.45   | 2.86   | 2.74   | 1.17   | 1.73   | 0.31   | 0.33   | 1.34   | 2.48  | 2.67  | 4.02  | 0.71   | 6.09   | 4.93   | 2.37  | 3.80   | 2.80  | 2.59  | 3.65   |       |
| 3.36   | 3.35   | -0.68  | 0.10   | 0.54   | 0.11   | 0.13   | -0.24  | -2.23  | -0.74  | -0.70  | -0.26  | 0.14   | -0.96  | -0.74  | -0.16  | -0.34  | 2.54  | 1.61  | 3.65  | 2.70   | 4.29   | 4.22   | 1.92  | 2.60   | 2.25  | 0.57  | 4.29   |       |
| 2.84   | -0.35  | 2.99   | 2.34   | 1.58   | 1.34   | 2.88   | 2.70   | -1.80  | 2.29   | 2.85   | 2.40   | 1.69   | 2.10   | 3.88   | 2.86   | 1.56   | 0.92  | 0.16  | 0.78  | -0.19  | -4.16  | 1.00   | 0.22  | 1.43   | -0.34 | -1.53 | -0.78  |       |
| -3.91  | -9.21  | 15.22  | 22.05  | 15.73  | 12.92  | 9.99   | 15.60  | 18.23  | 16.73  | 19.75  | 22.52  | 22.79  | 17.34  | 15.04  | 19.17  | 17.75  | -0.79 | 3.47  | -0.15 | -2.38  | -6.64  | 1.31   | 1.41  | 1.01   | -0.31 | 5.74  | -2.22  |       |
| -6.08  | -14.97 | 27.37  | 35.75  | 27.57  | 26.25  | 19.34  | 27.05  | 30.07  | 29.57  | 29.92  | 32.67  | 35.45  | 31.43  | 25.37  | 31.95  | 32.39  | -1.72 | 5.57  | -2.47 | -7.43  | -15.25 | 0.08   | -0.15 | -6.25  | -1.86 | 6.46  | -5.66  |       |
| 2.62   | 7.46   | -6.91  | -13.01 | -6.42  | -9.28  | -7.05  | -11.21 | -10.92 | -10.86 | -12.34 | -11.83 | -16.78 | -13.03 | -15.89 | -12.83 | -11.75 | -0.26 | 2.44  | -5.46 | -5.54  | -8.20  | -3.32  | -2.55 | -4.08  | -0.96 | -1.33 | -4.41  |       |
| 1.29   | 0.49   | 2.50   | 4.94   | 5.40   | 1.27   | 1.31   | 3.98   | 3.79   | 3.97   | 4.28   | 4.82   | 5.19   | 3.77   | -1.37  | 3.92   | 2.47   | 0.18  | 2.30  | -0.90 | -5.12  | -7.90  | -4.61  | -0.87 | -8.14  | -4.09 | 1.25  | -1.67  |       |
| 1.29   | 1.89   | 4.88   | 9.57   | 7.72   | 2.90   | 1.59   | 9.07   | 7.86   | 8.61   | 7.61   | 10.85  | 9.48   | 8.91   | 9.91   | 8.85   | 6.14   | -0.77 | 1.50  | -0.84 | -7.45  | -11.14 | -5.51  | -0.99 | -9.63  | 0.15  | 1.64  | -3.61  |       |
| 0.12   | -1.18  | -13.83 | -21.51 | -15.45 | -14.72 | -10.26 | -14.66 | -12.42 | -19.98 | -14.43 | -23.69 | -19.96 | -16.71 | -19.28 | -17.61 | -16.88 | -1.58 | 1.48  | -2.49 | -5.39  | -3.99  | -4.46  | -2.71 | -1.73  | -8.50 | -4.01 | -0.73  | -2.12 |
| -1.53  | -1.26  | 1.24   | 1.41   | 5.39   | 1.17   | 2.00   | 1.62   | 1.74   | 2.27   | 0.90   | 1.45   | 1.29   | 1.99   | 0.52   | 1.88   | 0.85   | 0.92  | 1.88  | 1.77  | 1.61   | 1.28   | 2.07   | 0.48  | 2.43   | 0.61  | 1.03  | 0.24   |       |
| -0.14  | -0.08  | 0.37   | 0.43   | 1.47   | -0.45  | -0.23  | 0.20   | 0.47   | -0.07  | -0.10  | 0.15   | -0.64  | 0.05   | -0.88  | -1.26  | -0.47  | -0.74 | 0.62  | -0.28 | -0.15  | 0.36   | 1.29   | 0.16  | 0.44   | 0.23  | 1.06  | 0.92   |       |
| -2.05  | -0.60  | 2.40   | 2.04   | 6.01   | 3.27   | 3.27   | 1.59   | 1.72   | 1.22   | 1.20   | 2.97   | 1.74   | 1.21   | 2.62   | 2.28   | 2.37   | 0.77  | 2.39  | 2.35  | 1.46   | 1.03   | 1.61   | 2.37  | 2.11   | 1.96  | 0.52  | 1.79   |       |
| -0.61  | 0.59   | 1.70   | 3.06   | 4.79   | 1.09   | 1.02   | 2.46   | 2.62   | 3.37   | -0.07  | 0.41   | 0.22   | -0.50  | -10.55 | 2.23   | 2.32   | 0.57  | 1.51  | -0.14 | 0.26   | 1.07   | 2.66   | 2.00  | 0.73   | -0.49 | 0.61  | -1.23  |       |
| 0.56   | 0.85   | 1.03   | 1.30   | 3.75   | 2.33   | 1.69   | 0.69   | 0.70   | 2.41   | 0.96   | 0.75   | 0.76   | 1.62   | -1.67  | 0.35   | -0.03  | 2.15  | 0.63  | 2.03  | 0.20   | 1.71   | 2.17   | 0.03  | 1.65   | 0.59  | 0.36  | 0.86   |       |
| 3.10   | 2.19   | 1.21   | 2.47   | 3.47   | 3.28   | 1.42   | 0.68   | 3.66   | 2.59   | 0.33   | 0.88   | -0.04  | 1.92   | 14.94  | 1.16   | 0.21   | 1.95  | 1.17  | 2.68  | -0.45  | 2.79   | 2.40   | 2.37  | 4.16   | 0.30  | 0.65  | 2.97   |       |
| 1.94   | 0.41   | 0.03   | 1.24   | -0.15  | 0.95   | 2.47   | 1.88   | 0.65   | 0.90   | 1.64   | 1.50   | 1.37   | 1.58   | 0.88   | 0.20   | 0.19   | 1.57  | 2.02  | 1.85  | 1.19   | 3.00   | 2.69   | 2.80  | 2.72   | 1.65  | 2.65  | 2.50   |       |
| 0.94   | 2.22   | 2.08   | 1.69   | 3.33   | 1.01   | 1.89   | 0.71   | 2.58   | 0.89   | 1.19   | 2.02   | 1.11   | 0.65   | 1.25   | 0.52   | 1.05   | 1.25  | 2.31  | 1.25  | 2.01   | 2.26   | 2.11   | 0.74  | 1.87   | 1.39  | 1.88  | 3.10   |       |
| -0.24  | 1.12   | 1.48   | 1.43   | 3.39   | 0.23   | 1.66   | 2.16   | 2.27   | 2.31   | 2.77   | 1.90   | 2.42   | 0.94   | 0.95   | 0.49   | 0.58   | 1.85  | 2.00  | 1.74  | 1.79   | 3.01   | 2.59   | 1.74  | 1.91   | 0.38  | 2.50  | 3.12   |       |
| -0.38  | -1.57  | 0.41   | -0.04  | 1.78   | -0.15  | -0.48  | 1.66   | 2.02   | -0.44  | -0.43  | 1.40   | -1.17  | 0.41   | -1.06  | -1.58  | -1.51  | -1.00 | 1.00  | -1.17 | -1.30  | -1.53  | 1.36   | 0.86  | 0.58   | -3.22 | 1.03  | -0.04  |       |
| 0.09   | 0.58   | -1.52  | -2.39  | 0.10   | -1.47  | -0.90  | -0.83  | -0.90  | -1.39  | -2.33  | -2.41  | -2.30  | -3.39  | -1.68  | -1.72  | -2.32  | 0.14  | 1.04  | -0.38 | 0.69   | 2.94   | 3.22   | 0.26  | 1.38   | -0.03 | 1.77  | 2.41   |       |
| -0.37  | -0.37  | 2.19   | 2.72   | 4.55   | 3.80   | 2.11   | 4.26   | 2.50   | 2.10   | 1.26   | 3.79   | 3.53   | 1.17   | 2.80   | 1.59   | 1.92   | 1.01  | 1.81  | 3.08  | 1.16   | 6.50   | 4.81   | 3.43  | 3.39   | 2.43  | 0.43  | 2.36   |       |
| 8.06   | 4.79   | -3.11  | -3.48  | -4.24  | -1.77  | -0.95  | -1.10  | -1.50  | -2.03  | -3.24  | -2.10  | -3.74  | -4.15  | -3.71  | -5.21  | -3.87  | 2.37  | 1.77  | 3.27  | 3.27   | 3.25   | 4.03   | 0.57  | 3.17   | 1.34  | 3.13  | 2.07   |       |
| -1.92  | -0.97  | 1.67   | 2.00   | 3.57   | 2.79   | 2.22   | 2.01   | 2.53   | 3.06   | 2.21   | 1.77   | 2.38   | 2.34   | 2.36   | 2.62   | 0.99   | 0.97  | 0.16  | 1.75  | 1.24   | 3.36   | 4.29   | 1.95  | 3.10   | 1.23  | 0.53  | 2.27   |       |
| -1.77  | -2.55  | 1.59   | 0.81   | 3.15   | 0.67   | 1.59   | 1.83   | 0.64   | 0.46   | 0.80   | 0.25   | 0.30   | 0.23   | 0.36   | 2.42   | 0.90   | 1.71  | -0.09 | 0.71  | -0.82  | -0.21  | 1.97   | -0.39 | 1.28   | 0.56  | -0.32 | 0.06   |       |
| 0.52   | -0.95  | 4.34   | 10.98  | 7.30   | 4.74   | 0.13   | 5.59   | 7.25   | 6.52   | 9.37   | 12.67  | 7.85   | 5.66   | 1.64   | 7.34   | 8.48   | -2.62 | 1.95  | -4.21 | -6.64  | -9.53  | -5.57  | -1.01 | -3.38  | -1.53 | 1.74  | -2.99  |       |
| 0.87   | 1.59   | 4.55   | 9.80   | 4.41   | 4.80   | 0.96   | 5.15   | 7.79   | 7.61   | 11.42  | 12.21  | 9.17   | 9.08   | 1.34   | 7.77   | 10.61  | -0.63 | 1.33  | -4.15 | -5.67  | -10.65 | -6.65  | -4.08 | -3.03  | 0.09  | 1.97  | -2.69  |       |
| -1.35  | -0.33  | -13.27 | -26.66 | -13.60 | -14.59 | -16.51 | -15.72 | -20.32 | -23.04 | -22.41 | -29.99 | -29.31 | -20.23 | -22.84 | -21.76 | -24.92 | -2.49 | -1.26 | -6.00 | -9.01  | -12.77 | -7.92  | -2.19 | -6.45  | -3.94 | -1.20 | -6.88  |       |
| -0.21  | -3.14  | -6.17  | -10.34 | -2.95  | -4.52  | -5.96  | -5.45  | -7.94  | -8.57  | -7.34  | -15.23 | -8.14  | -6.59  | -7.35  | -8.55  | -8.66  | 2.74  | 2.11  | 0.95  | 1.15   | 3.50   | 1.19   | 0.85  | 2.11   | 1.96  | 0.84  | 2.81   |       |
| -2.01  | -2.67  | -9.27  | -18.82 | -8.88  | -8.41  | -10.08 | -10.88 | -11.71 | -14.94 | -12.49 | -23.45 | -12.01 | -12.28 | -10.26 | -13.73 | -11.47 | 4.01  | 4.98  | 2.54  | 3.99   | 5.57   | 4.61   | 2.49  | 3.95   | 4.77  | 3.13  | 5.45   |       |
| -1.26  | 1.17   | 1.18   | 0.28   | 1.72   | 0.65   | -1.66  | 0.49   | 0.17   | 0.62   | 0.16   | 1.03   | -1.36  | -0.21  | -2.03  | 2.04   | 3.06   | 2.67  | 0.35  | 3.83  | 2.23   | 2.60   | -2.09  | 0.98  | 0.21   | 2.62  | 1.58  | 2.09   |       |
| -6.21  | -9.37  | -7.72  | -8.79  | -5.19  | -9.58  | -9.24  | -10.57 | -11.92 | -10.74 | -5.79  | -8.42  | -11.29 | -9.49  | -11.79 | -11.17 | -11.94 | -8.28 | -7.35 | -9.33 | -8.48  | -10.49 | -10.40 | -9.07 | -12.08 | -6.76 | -8.87 | -11.44 |       |
| 0.26   | 0.87   | 1.85   | 2.31   | 2.14   | 0.60   | 0.47   | 1.61   | 1.70   | 1.03   | 0.47   | 0.98   | 0.88   | 2.09   | -0.32  | 1.31   | 0.51   | 1.08  | 1.79  | 0.81  | 2.23   | -0.47  | 2.13   | 1.99  | 1.75   | 0.48  | 0.96  | 1.25   |       |
| -0.72  | 0.80   | 1.06   | -0.38  | 2.87   | 0.32   | 1.81   | 0.79   | 1.84</ |        |        |        |        |        |        |        |        |       |       |       |        |        |        |       |        |       |       |        |       |

|        |        |        |        |        |        |        |        |        |        |        |        |        |        |        |        |        |        |       |        |        |        |        |        |        |       |        |        |       |
|--------|--------|--------|--------|--------|--------|--------|--------|--------|--------|--------|--------|--------|--------|--------|--------|--------|--------|-------|--------|--------|--------|--------|--------|--------|-------|--------|--------|-------|
| 2.92   | 1.74   | 36.23  | 37.36  | 34.31  | 37.92  | 30.37  | 38.03  | 30.55  | 36.77  | 29.48  | 33.42  | 31.20  | 34.83  | 28.63  | 40.99  | 23.46  | 1.46   | 3.27  | 3.75   | -2.13  | 4.24   | -0.56  | 7.92   | 6.10   | 1.83  | 7.79   | 7.69   |       |
| 4.36   | 1.62   | 70.88  | 69.24  | 70.31  | 75.42  | 53.41  | 76.13  | 65.16  | 68.32  | 57.00  | 59.40  | 57.65  | 73.13  | 60.91  | 81.58  | 50.86  | 1.00   | 6.66  | 0.53   | -8.55  | -5.80  | -0.37  | 4.39   | -0.43  | 4.95  | 7.92   | 9.08   |       |
| 1.03   | -1.39  | -13.31 | -20.41 | -25.57 | -17.88 | -19.44 | -22.40 | -18.30 | -17.56 | -18.81 | -20.27 | -22.71 | -24.36 | -27.10 | -23.55 | -19.95 | -1.15  | 4.58  | -10.51 | -10.36 | -7.80  | 3.24   | 5.12   | -10.88 | -0.32 | 5.13   | -2.60  |       |
| -33.50 | -18.66 | 16.19  | 10.30  | 23.35  | 22.54  | 16.61  | 18.57  | 15.73  | 17.08  | 13.97  | 7.88   | 14.94  | 16.88  | 24.38  | 16.02  | 12.63  | -1.01  | -0.30 | -1.74  | -17.64 | -18.74 | -11.23 | -0.93  | -12.45 | -6.88 | 5.52   | -12.63 |       |
| -8.46  | -5.91  | 0.35   | 1.32   | 4.70   | 0.79   | -1.32  | -1.69  | -1.03  | -0.83  | -1.73  | 1.94   | -4.10  | -3.11  | -4.66  | -4.06  | -3.42  | -4.12  | -0.13 | -4.90  | -10.20 | -10.67 | -10.65 | -6.63  | -11.17 | -7.30 | 0.07   | -5.19  |       |
| -1.50  | -0.28  | -1.04  | -1.08  | 1.70   | -1.56  | -0.29  | -2.28  | -0.03  | -2.03  | -1.91  | -3.07  | -0.21  | -0.93  | 0.01   | -7.71  | -1.49  | -0.19  | -1.12 | 0.43   | 1.21   | -1.13  | -0.17  | -1.07  | -0.81  | -0.33 | 0.36   | 1.11   |       |
| 2.53   | 2.87   | 2.33   | 2.11   | 4.92   | 1.70   | 1.30   | 1.11   | 0.24   | 1.38   | 0.41   | 0.38   | 1.90   | 0.31   | 0.61   | 0.17   | 0.35   | 4.83   | 4.48  | 3.93   | 2.95   | 3.15   | 5.01   | 3.57   | 3.41   | 2.28  | 4.13   | 2.91   |       |
| -1.90  | -1.26  | 0.62   | 0.40   | 3.49   | 0.30   | -0.12  | 0.65   | -0.09  | 0.22   | 0.72   | -0.22  | -0.69  | -0.14  | -0.74  | 1.13   | 0.02   | -1.50  | -0.36 | -0.05  | -1.57  | -1.69  | 0.74   | -1.39  | -1.38  | 1.12  | -1.21  | -0.54  |       |
| 2.73   | 3.86   | 1.63   | 2.15   | 4.07   | 1.15   | 1.81   | 1.43   | 1.34   | 0.35   | 1.11   | 1.52   | 1.81   | 1.08   | -1.26  | -0.78  | 0.99   | 1.64   | 3.36  | 1.61   | 1.13   | 2.28   | 3.11   | 2.34   | 2.34   | 2.63  | 4.48   | 1.54   |       |
| -4.92  | -6.29  | 2.84   | 3.50   | 5.56   | 3.87   | 2.74   | 4.72   | 4.19   | 4.92   | 3.44   | 2.04   | 3.07   | 4.45   | 4.87   | 4.86   | 3.32   | -3.04  | -0.65 | -0.98  | -3.45  | -3.88  | -2.79  | -1.71  | -3.56  | -3.21 | -0.23  | -2.28  |       |
| -2.87  | -3.39  | 3.54   | 2.80   | 5.94   | 3.96   | 3.72   | 4.16   | 2.83   | 4.19   | 3.19   | 3.01   | 3.16   | 3.85   | 4.66   | 4.67   | 2.78   | -2.22  | -1.35 | -0.34  | -2.19  | -1.69  | 1.22   | -0.39  | -2.06  | -1.33 | 0.27   | 0.41   |       |
| -1.51  | -1.78  | 1.64   | 2.69   | 4.47   | 3.59   | 0.66   | 2.00   | 3.28   | 2.83   | 3.59   | 2.72   | 2.85   | 3.62   | 4.37   | 2.80   | 3.10   | -1.40  | 1.33  | 1.21   | -0.08  | -2.40  | 1.06   | -1.24  | -0.96  | -1.04 | 1.49   | 0.86   |       |
| 1.34   | 0.86   | 2.93   | 3.71   | 4.33   | 3.57   | 3.16   | 3.57   | 3.98   | 2.77   | 1.58   | 2.66   | 1.91   | 1.68   | 0.70   | 0.27   | 2.99   | 3.59   | 3.14  | 4.27   | 1.57   | 6.29   | 5.03   | 3.80   | 3.08   | 3.11  | 2.82   | 5.30   |       |
| 4.96   | 3.79   | -0.41  | -0.36  | 0.51   | -0.70  | -0.05  | 0.20   | -2.35  | -0.36  | -0.78  | -0.59  | 0.13   | -0.87  | -1.39  | 0.45   | -0.93  | 2.44   | 2.13  | 3.55   | 3.00   | 4.74   | 4.43   | 1.88   | 2.54   | 2.87  | 1.12   | 3.83   |       |
| 1.59   | 0.68   | 3.24   | 0.89   | 1.64   | 2.18   | 3.78   | 3.62   | -1.51  | 1.25   | 2.65   | 3.48   | 2.12   | 3.36   | 2.64   | 3.10   | 1.74   | 0.82   | 0.37  | 0.71   | -1.37  | -3.01  | 4.01   | -0.37  | 0.46   | 0.64  | -1.48  | 0.32   |       |
| -4.96  | -12.10 | 18.91  | 23.32  | 19.04  | 17.32  | 15.09  | 19.41  | 23.75  | 18.24  | 24.64  | 23.27  | 24.09  | 19.17  | 20.49  | 21.19  | 19.84  | -0.38  | 5.11  | -0.63  | -1.71  | -6.51  | 3.31   | 2.28   | 2.39   | 1.23  | 7.78   | -0.23  |       |
| -7.39  | -18.24 | 34.74  | 36.47  | 35.21  | 33.98  | 28.67  | 31.47  | 40.54  | 32.93  | 39.37  | 34.14  | 37.90  | 36.88  | 34.88  | 36.96  | 35.79  | -0.52  | 8.46  | -0.92  | -7.40  | -15.88 | 1.32   | 0.95   | -5.18  | -0.20 | 9.77   | -5.07  |       |
| 3.03   | 9.23   | -9.21  | -12.90 | -8.68  | -12.55 | -10.61 | -13.19 | -15.48 | -11.63 | -16.19 | -12.53 | -16.97 | -15.17 | -20.04 | -14.64 | -13.08 | -1.62  | -3.10 | -6.27  | -6.78  | -8.43  | -4.80  | -2.86  | -4.24  | -1.23 | -0.63  | -6.05  |       |
| 1.71   | 0.67   | 5.57   | 6.24   | 7.74   | 4.03   | 2.41   | 5.21   | 6.71   | 6.27   | 7.09   | 7.12   | 6.56   | 5.00   | 0.23   | 7.09   | 5.35   | 0.57   | 1.33  | 0.07   | -5.93  | -8.97  | -4.74  | -1.53  | -8.08  | -0.08 | 2.33   | -1.52  |       |
| 1.87   | 1.83   | 10.77  | 12.16  | 13.84  | 8.67   | 5.57   | 13.44  | 13.73  | 13.29  | 12.79  | 12.61  | 14.16  | 13.69  | 4.34   | 13.47  | 11.08  | -0.65  | 3.20  | 0.04   | -7.63  | -11.84 | -5.54  | -0.95  | -9.89  | 1.05  | 2.06   | -3.57  |       |
| -0.21  | -2.53  | -24.69 | -26.41 | -23.81 | -25.42 | -21.52 | -25.83 | -25.37 | -30.03 | -25.17 | -27.38 | -29.67 | -26.90 | -29.35 | -26.89 | -27.58 | -1.24  | -0.38 | -4.07  | -7.16  | -5.94  | -4.57  | -4.57  | -9.31  | -4.77 | -2.10  | -2.63  |       |
| -1.96  | -2.14  | 0.84   | 0.30   | 4.03   | 4.97   | 1.12   | 1.57   | 0.96   | 1.63   | 2.80   | 1.15   | 1.39   | 1.24   | 1.02   | 0.07   | 1.91   | -0.60  | -0.40 | 1.67   | 2.12   | 1.26   | 2.38   | 3.67   | 4.56   | 2.45  | 1.34   | 1.06   | -0.09 |
| 0.30   | 0.04   | 0.73   | 0.79   | 1.53   | 0.10   | -0.79  | 0.36   | 0.26   | 0.10   | -0.72  | 0.25   | -0.72  | -0.13  | -0.66  | -0.98  | 0.44   | -0.41  | 0.50  | -0.10  | 0.38   | 0.23   | 1.52   | 0.72   | 0.71   | 0.77  | 1.14   | 0.95   |       |
| -3.33  | -1.79  | 2.48   | 2.10   | 5.68   | 2.33   | 3.74   | 1.99   | 1.34   | 0.59   | 3.17   | 2.57   | 1.74   | 1.04   | 3.01   | 3.35   | 0.66   | 1.12   | 2.74  | 3.13   | 0.26   | 1.46   | 4.22   | 1.47   | 2.74   | 1.71  | 1.70   | 1.95   |       |
| -1.26  | 0.08   | 3.09   | 2.16   | 5.33   | 1.59   | 0.88   | 2.68   | 2.73   | 2.68   | 0.80   | 1.46   | 0.50   | -0.39  | -10.92 | 1.61   | 1.93   | -0.01  | 1.09  | 0.08   | 1.36   | 1.02   | 3.82   | 0.19   | 1.03   | -1.77 | 0.74   | -0.84  |       |
| -1.57  | 0.85   | 2.13   | 1.79   | 5.37   | 2.05   | 1.62   | 1.15   | 1.14   | 2.60   | 0.21   | 0.42   | 1.01   | 1.71   | -2.04  | 0.73   | 0.26   | 0.80   | 0.74  | 0.73   | -0.48  | 1.62   | 1.86   | 0.07   | 1.25   | 1.03  | -0.44  | 0.34   |       |
| 2.16   | 3.33   | 3.59   | 2.36   | 5.37   | 4.46   | 3.83   | 0.17   | 3.86   | 4.50   | 2.37   | 1.61   | 2.21   | 1.97   | 16.37  | 2.22   | 0.76   | 0.03   | 1.10  | 0.98   | -0.92  | 2.49   | 2.18   | -0.05  | 4.04   | -0.40 | 0.88   | 2.06   |       |
| 2.41   | 0.02   | 0.91   | 1.21   | -0.60  | 1.59   | 0.78   | 0.66   | 0.52   | 0.92   | 1.17   | 1.37   | 1.41   | 1.25   | 1.43   | -0.27  | 0.07   | 1.89   | 1.79  | 2.47   | 1.86   | 3.38   | 4.21   | 3.43   | 3.15   | 1.22  | 2.32   | 3.03   |       |
| 0.66   | 2.45   | 1.81   | 1.45   | 3.31   | 0.90   | 1.85   | 1.63   | 2.37   | 0.34   | 1.28   | 1.49   | 1.18   | 0.34   | 0.55   | 0.75   | 0.47   | 1.54   | 2.63  | 1.23   | 2.13   | 2.78   | 2.02   | 1.71   | 1.94   | 2.27  | 3.11   | 3.11   |       |
| -0.15  | 1.43   | 1.46   | 0.73   | 3.43   | 0.13   | 0.86   | 1.62   | 1.66   | 2.21   | 2.28   | 1.65   | 1.53   | 1.14   | 1.74   | 0.39   | 0.30   | 1.00   | 1.40  | 2.04   | -0.30  | 3.52   | 1.48   | 2.35   | 2.14   | 1.00  | 2.55   | 4.64   |       |
| -0.55  | -0.72  | 1.23   | 0.37   | 1.50   | -1.07  | -1.21  | 0.48   | 2.37   | 0.49   | -1.34  | 0.94   | -1.19  | 0.22   | -1.15  | -0.77  | -2.01  | -0.34  | 1.46  | -0.57  | -1.80  | -0.86  | 1.10   | 1.25   | -0.47  | -2.72 | 0.81   | -0.25  |       |
| -0.23  | 0.44   | -2.58  | -3.00  | -0.96  | -2.39  | -1.75  | -1.76  | -1.76  | -2.26  | -3.38  | -2.26  | -2.50  | -3.74  | -2.70  | -2.31  | -2.26  | -0.67  | 0.68  | -0.06  | 0.73   | 3.47   | 3.26   | 0.52   | 1.71   | 0.25  | 1.54   | 1.62   |       |
| 0.86   | -0.77  | 2.88   | 2.18   | 5.38   | 2.87   | 2.91   | 3.18   | 2.79   | 3.63   | 3.24   | 3.90   | 1.59   | 3.35   | 3.45   | 1.12   | 2.22   | 0.90   | 1.99  | 2.01   | 1.08   | 5.86   | 4.58   | 3.34   | 3.71   | 1.88  | 0.84   | 2.54   |       |
| 8.31   | 7.59   | -3.87  | -5.05  | -1.23  | -3.81  | -2.25  | -2.52  | -3.40  | -2.60  | -3.99  | -2.31  | -4.99  | -4.74  | -4.56  | -5.30  | -4.61  | 1.59   | 1.52  | 2.85   | 3.45   | 5.00   | 4.18   | 0.62   | 2.81   | 2.72  | 2.60   | 1.63   |       |
| -1.83  | -2.10  | 3.00   | 2.39   | 3.85   | 4.10   | 2.71   | 3.12   | 2.63   | 3.26   | 2.07   | 1.48   | 2.65   | 2.79   | 1.63   | 2.79   | 1.95   | 1.01   | 1.22  | 1.86   | 1.28   | 4.06   | 4.61   | 2.29   | 4.20   | 1.28  | 1.62   | 1.72   |       |
| -2.37  | -2.75  | 1.07   | 2.03   | 4.04   | 0.43   | 1.41   | 1.48   | 2.49   | 1.57   | 0.09   | 0.40   | 0.43   | 0.97   | 1.61   | 1.42   | 1.00   | 1.69   | -1.25 | 0.25   | -0.82  | 0.61   | 2.35   | 1.02   | 0.75   | 1.32  | 0.46   | -0.02  |       |
| 0.97   | 0.92   | 11.17  | 14.37  | 13.92  | 9.99   | 5.15   | 12.12  | 15.03  | 13.62  | 16.50  | 17.00  | 15.29  | 12.38  | 6.97   | 12.77  | 15.92  | -1.08  | 2.23  | -4.22  | -7.89  | -9.76  | -6.67  | -0.53  | -4.02  | -1.06 | 2.12   | -3.31  |       |
| 0.99   | 1.21   | 12.52  | 14.85  | 11.70  | 11.45  | 5.07   | 11.65  | 16.35  | 14.70  | 20.24  | 16.81  | 17.18  | 16.82  | 6.62   | 15.50  | 18.24  | -0.76  | 2.06  | -4.16  | -6.31  | -11.79 | -7.37  | 0.06   | -3.83  | 0.70  | 3.11   | -3.20  |       |
| -2.09  | -0.75  | -30.50 | -35.73 | -30.69 | -29.82 | -30.88 | -31.66 | -34.94 | -38.35 | -36.01 | -37.24 | -40.06 | -34.51 | -37.21 | -35.86 | -36.40 | -3.42  | -2.04 | -7.58  | -9.79  | -13.52 | -10.68 | -2.74  | -9.19  | -5.01 | -3.43  | -8.18  |       |
| -1.90  | -3.09  | -14.43 | -15.87 | -9.37  | -10.00 | -12.39 | -11.49 | -13.66 | -13.28 | -13.35 | -16.24 | -12.72 | -14.56 | -11.95 | -16.11 | -14.90 | 2.01   | 3.52  | 0.90   | 0.35   | 3.83   | 1.02   | 0.55   | 2.59   | 0.92  | 4.00   | 2.02   |       |
| -2.91  | -5.03  | -20.46 | -26.63 | -17.90 | -17.15 | -19.20 | -20.34 | -21.08 | -23.68 | -21.42 | -26.34 | -20.76 | -22.65 | -17.23 | -23.10 | -21.52 | 4.26   | 3.61  | 1.93   | 3.78   | 6.01   | 4.66   | 2.19   | 4.21   | 4.22  | 2.32   | 3.66   |       |
| -1.14  | 2.37   | -1.27  | -0.71  | -0.19  | -1.70  | -4.75  | -1.58  | -1.58  | -1.07  | -0.43  | 1.63   | -2.39  | -1.90  | -2.47  | -1.75  | -1.50  | 1.14   | 1.65  | 3.68   | 1.35   | 2.35   | 0.55   | 1.53   | 1.41   | 1.87  | 3.11   | -0.50  |       |
| -7.84  | -9.54  | -9.67  | -11.26 | -8.40  | -11.81 | -11.22 | -12.94 | -13.88 | -13.90 | -9.00  | -9.94  | -13.71 | -12.34 | -13.04 | -14.50 | -14.00 | -10.07 | -9.36 | -11.33 | -9.90  | -12.25 | -11.30 | -11.37 | -14.92 | 8.57  | -11.26 | -14.10 |       |
| 0.25   | 0.36   | 1.85   | 1.75   | 3.01   | 0.89   | 0.77   | 1.97   | 0.87   | 2.14   | 0.72   | 0.99   | 1.85   | 2.05   | 0.16   | 1.79   | 0.76   | 1.22   | 2.26  | 1.60   | 1.94   | -0.51  | 1.29   | 3.20   | 1.79   | 1.47  | -0.40  | 1.43   |       |
| -0.52  | 1.20   | 1.78   | -0.07  | 3.57   | 2.34   | 1.91   | 2.37   | 2.39   | 2.32   | 0.74   | 2.48   | -0.14  | 1.06   | 0.00   | 1.06   | 2.26   | -0.93  | 1.24  | 0.53   | 0.53   | -1.14  | -0.46  | 1.67   | 2.77   | 0.77  | 0.94   | 0.48   |       |
| -0.90  | -0.57  | -1.4   | 1.07   | 1.87   | 0.87   | 0.82   | 1.83   | -1.05  | 0.88   | -1.58  | 0.22   | -0.02  | 0.28   | 1.04   | -0.38  | -0.74  | 0.77   | 0.68  | 1.26   | -0.30  | 0.18   | 1.90   | 0.05   | 1.01   | -1.14 | 0.72   | -0.36  |       |
| -1.08  | -1.92  | 0.45   | -0.57  | 0.19   | 0.38   | -0.15  | -0.87  | 0.98   | 0.50   | -0.38  | 0.06   | -0.76  | -0.29  | -0.26  | 0.47   | 0.16   | -1.09  | -0.60 | -1.06  | -1.40  | 0.61   | 0.09   | -0.23  | -0.60  | -0.92 | -0.56  | 0.33   |       |
| -1.03  | -0.01  |        |        |        |        |        |        |        |        |        |        |        |        |        |        |        |        |       |        |        |        |        |        |        |       |        |        |       |

|        |        |        |        |        |        |        |        |        |        |        |        |        |        |        |        |        |        |        |        |        |        |        |        |        |        |        |        |
|--------|--------|--------|--------|--------|--------|--------|--------|--------|--------|--------|--------|--------|--------|--------|--------|--------|--------|--------|--------|--------|--------|--------|--------|--------|--------|--------|--------|
| -47.14 | -29.51 | 15.66  | 11.59  | 22.63  | 21.63  | 26.21  | 18.38  | 17.01  | 16.33  | 13.06  | 7.63   | 13.21  | 15.19  | 22.71  | 15.05  | 10.17  | 1.40   | 6.86   | 1.82   | -13.28 | -13.40 | -6.76  | 4.89   | -6.79  | -3.51  | 7.93   | -6.78  |
| -12.97 | -8.17  | 0.27   | 0.47   | 4.64   | 1.30   | -0.95  | -2.66  | -1.34  | -1.12  | -2.50  | 1.82   | -3.68  | -2.36  | -4.77  | -4.20  | -3.15  | -3.88  | -0.39  | -3.62  | -9.27  | -8.60  | -10.03 | -6.52  | -9.99  | -7.45  | -0.58  | -3.76  |
| -1.07  | -0.64  | -0.46  | -1.17  | 1.26   | -0.43  | -0.31  | -0.22  | 0.34   | -2.38  | -0.86  | -2.69  | 0.03   | -0.86  | -0.07  | -1.61  | -1.41  | -0.12  | -1.84  | 0.96   | 1.93   | 0.18   | -0.47  | -0.41  | -1.37  | -0.64  | -0.38  | 0.77   |
| 2.39   | 3.45   | 1.18   | 2.06   | 5.35   | 1.43   | 1.63   | 0.91   | 1.32   | 0.67   | 1.35   | 0.59   | 1.16   | -0.62  | -0.52  | 0.92   | 0.03   | 4.28   | 4.24   | 3.38   | 1.62   | 3.51   | 5.37   | 3.28   | 3.49   | 2.95   | 3.78   | 3.30   |
| -2.45  | -1.76  | 0.23   | 0.29   | 3.42   | -0.06  | -0.02  | 0.48   | -0.80  | 1.94   | 0.35   | 0.31   | -0.63  | 0.25   | -0.50  | 1.34   | -0.70  | -0.97  | -0.38  | -0.70  | -1.11  | -1.62  | -1.19  | -0.75  | -1.42  | -0.68  | -1.10  | -0.48  |
| 6.12   | 4.13   | 1.70   | 1.67   | 3.97   | 1.57   | 1.66   | 2.66   | 2.26   | 0.99   | 1.45   | 2.63   | 1.71   | 0.34   | -0.21  | 0.11   | 0.61   | 1.36   | 1.06   | 2.21   | 2.12   | 1.33   | 3.71   | 2.57   | 2.77   | 1.45   | 2.85   | 2.93   |
| -6.01  | -6.02  | 3.50   | 2.83   | 6.26   | 3.83   | 4.11   | 5.25   | 5.01   | 4.37   | 3.73   | 1.34   | 2.11   | 4.10   | 5.44   | 5.05   | 2.07   | -3.06  | -0.79  | -2.24  | -4.02  | -3.59  | -2.88  | -1.74  | -3.76  | -3.81  | -0.34  | -1.23  |
| -3.89  | -3.76  | 3.52   | 2.19   | 6.73   | 3.40   | 5.20   | 5.43   | 4.01   | 4.36   | 3.44   | 2.39   | 2.80   | 3.64   | 5.73   | 4.83   | 3.07   | -2.29  | -1.96  | 0.12   | -2.46  | -2.16  | 1.29   | -0.63  | -1.69  | -1.32  | 0.75   | 0.40   |
| -3.25  | -2.06  | 2.47   | 2.38   | 6.31   | 4.17   | 2.21   | 3.27   | 3.70   | 1.12   | 4.07   | 1.85   | 2.14   | 3.43   | 4.60   | 3.26   | 3.38   | -1.00  | 1.21   | 1.58   | -0.88  | -1.26  | 1.17   | -0.81  | -1.17  | -1.60  | 2.81   | 1.41   |
| 2.01   | 1.19   | 4.22   | 4.69   | 4.89   | 3.48   | 4.06   | 4.58   | 4.45   | 2.78   | 2.62   | 3.59   | 2.20   | 3.72   | 1.66   | 3.43   | 2.57   | 3.80   | 3.47   | 4.28   | 1.69   | 6.81   | 4.97   | 3.63   | 3.86   | 2.41   | 3.73   | 4.36   |
| 6.00   | 4.97   | -1.09  | 0.16   | 0.22   | -0.14  | 0.26   | 0.72   | -2.17  | 0.33   | -1.01  | 0.34   | 0.78   | -0.25  | -1.03  | 0.23   | 1.38   | 1.92   | 1.51   | 3.08   | 5.34   | 5.05   | 1.48   | 3.29   | 2.20   | 4.77   | 4.48   |        |
| 2.77   | -0.38  | 3.15   | 1.13   | 2.60   | 3.23   | 3.02   | 3.57   | 0.34   | 1.39   | 2.64   | 2.62   | 1.79   | 1.57   | 3.38   | 3.78   | 3.39   | 1.12   | 0.02   | 0.10   | -1.10  | -2.88  | 0.48   | -0.20  | 0.83   | 2.07   | -0.37  | 1.13   |
| -5.88  | -13.84 | 18.13  | 20.55  | 18.96  | 16.69  | 15.83  | 18.33  | 23.56  | 17.28  | 23.08  | 20.68  | 21.23  | 18.41  | 20.31  | 20.30  | 18.39  | 1.08   | 7.49   | 1.53   | -1.43  | -0.66  | 4.62   | 5.47   | 1.59   | 2.78   | 9.90   | -0.09  |
| -8.01  | -21.42 | 34.10  | 32.83  | 31.87  | 33.23  | 30.03  | 30.30  | 40.46  | 29.71  | 37.17  | 30.18  | 33.65  | 33.68  | 34.71  | 34.04  | 32.37  | 10.03  | 12.00  | 0.33   | -6.52  | -17.03 | 2.48   | 4.01   | -4.34  | 1.38   | 12.83  | -2.19  |
| 3.03   | 9.88   | -8.84  | -11.62 | -8.68  | -11.66 | -11.14 | -12.81 | -13.76 | -10.61 | -14.91 | -11.43 | -15.54 | -14.19 | -20.60 | -14.97 | -11.52 | -2.26  | -5.04  | -6.72  | -6.83  | -9.57  | -5.99  | -4.18  | -7.78  | -1.51  | -2.51  | -5.16  |
| 1.37   | 1.02   | 6.01   | 4.18   | 8.25   | 4.79   | 5.00   | 6.39   | 8.55   | 6.76   | 7.63   | 6.44   | 7.47   | 5.82   | 1.05   | 7.66   | 4.57   | 0.00   | 2.59   | -0.22  | -7.92  | -9.48  | -4.99  | -1.72  | -8.87  | -0.39  | 3.04   | -1.77  |
| 2.14   | 2.49   | 12.27  | 10.86  | 14.72  | 10.58  | 9.58   | 13.62  | 15.05  | 13.60  | 14.55  | 12.17  | 14.04  | 15.06  | 5.32   | 14.56  | 12.36  | -0.68  | 3.40   | -0.47  | -9.88  | -12.74 | -6.17  | -0.30  | -10.63 | 1.22   | 3.00   | -2.66  |
| -0.34  | -0.05  | -28.75 | -26.10 | -26.25 | -30.37 | -28.10 | -25.25 | -26.95 | -31.03 | -27.65 | -26.70 | -29.64 | -27.66 | -33.50 | -28.50 | -29.49 | -2.11  | -1.55  | -5.21  | -9.41  | -6.41  | -6.31  | -6.39  | -12.14 | -4.63  | -3.11  | -3.83  |
| -2.09  | -1.75  | 0.82   | 1.91   | 6.19   | 0.86   | 0.59   | 2.62   | 0.32   | 1.95   | 1.14   | 1.39   | 0.88   | 1.12   | 0.83   | 2.01   | 0.07   | -0.44  | 1.79   | 2.72   | 1.32   | 1.93   | 2.19   | 1.52   | 2.83   | 0.50   | 0.60   | -0.18  |
| 0.34   | 0.26   | -0.21  | 0.77   | 1.46   | 0.60   | 0.57   | 1.10   | 0.67   | 0.81   | -1.11  | -0.08  | -0.46  | 0.33   | -0.25  | -0.30  | -0.72  | -0.28  | 0.94   | -0.28  | -0.27  | -0.21  | 1.18   | 0.65   | 0.97   | -0.44  | 0.54   | 0.92   |
| -2.56  | -1.56  | 2.15   | 1.89   | 4.87   | 1.98   | 2.49   | 2.12   | 2.37   | 1.29   | 1.06   | 3.70   | 1.70   | 0.55   | 2.32   | 1.90   | 2.09   | 1.78   | 2.52   | 2.85   | 1.59   | 2.23   | 2.63   | 1.20   | 1.14   | 1.11   | 0.78   | 1.45   |
| -1.01  | -0.36  | 2.75   | 2.91   | 5.52   | 1.30   | 1.10   | 2.95   | 2.90   | 3.92   | 0.74   | 0.64   | 0.25   | -0.30  | -10.90 | 2.08   | 2.64   | -0.50  | 1.91   | 1.05   | -0.43  | 1.28   | 3.58   | -0.02  | 0.89   | -0.23  | 1.44   | 0.33   |
| 1.66   | 1.25   | 2.45   | 2.57   | 5.69   | 2.79   | 2.45   | 0.94   | 1.79   | 3.61   | 0.06   | 1.85   | 0.63   | 1.34   | -1.63  | 1.76   | -0.03  | 0.38   | 0.46   | 0.38   | -0.19  | 0.61   | 1.95   | -0.09  | 1.12   | -0.07  | 1.41   | -0.26  |
| 2.69   | 2.02   | 2.74   | 2.98   | 7.02   | 4.66   | 3.50   | 2.71   | 4.19   | 6.15   | 2.05   | 2.36   | 2.62   | 2.90   | 1.76   | 2.65   | 2.07   | -0.80  | 0.26   | 0.62   | -1.10  | 2.25   | 1.12   | 3.00   | -0.25  | 2.52   | 1.54   |        |
| 2.03   | 0.94   | 0.28   | 0.69   | -0.20  | 0.73   | 0.83   | 1.02   | -0.06  | -0.20  | 1.37   | 0.81   | 1.06   | 1.22   | 0.19   | 0.08   | -0.07  | 2.29   | 1.79   | 2.91   | 1.97   | 4.20   | 4.12   | 3.34   | 3.17   | 1.15   | 2.16   | 2.36   |
| 0.46   | 0.26   | 1.15   | 1.14   | 3.21   | 0.80   | 1.81   | 1.73   | 1.96   | 0.79   | 1.17   | 2.15   | 1.89   | 0.83   | 1.36   | 0.73   | 0.43   | 1.28   | 2.32   | 1.27   | 2.78   | 2.92   | 2.18   | 1.76   | 1.60   | 2.07   | 2.38   | 3.90   |
| 0.17   | 2.53   | 0.72   | 1.69   | 3.50   | 1.09   | 1.70   | 1.07   | 1.31   | 2.13   | 1.40   | 1.75   | 1.74   | 0.50   | 0.99   | 0.49   | 0.19   | 0.89   | 2.64   | 2.62   | 1.81   | 2.11   | 2.49   | 1.46   | 2.31   | 0.55   | 2.63   | 4.77   |
| -0.69  | -1.09  | 0.03   | 0.25   | 2.33   | 1.12   | -1.49  | 1.28   | 2.26   | 0.48   | -1.68  | 0.95   | -1.49  | -0.09  | -0.29  | -0.96  | -1.57  | -2.68  | 1.54   | -2.10  | -1.20  | -0.94  | 0.76   | 0.88   | -0.28  | -3.79  | 1.10   | 0.22   |
| -0.10  | 0.87   | -3.41  | -2.40  | -0.41  | -1.70  | -1.92  | -0.80  | -2.13  | -1.70  | -3.12  | -1.07  | -1.41  | -1.35  | -1.94  | -1.39  | -1.48  | -0.44  | 0.30   | -1.01  | 0.73   | 2.07   | 3.43   | 0.70   | 1.83   | -1.25  | 0.64   | 1.23   |
| 0.24   | 0.83   | 3.51   | 2.20   | 5.71   | 2.48   | 2.70   | 4.02   | 3.69   | 3.12   | 2.54   | 3.07   | 1.84   | 2.18   | 2.20   | 2.03   | 2.19   | 0.93   | 2.97   | 0.81   | 1.17   | 4.81   | 5.43   | 2.45   | 4.02   | 1.87   | 1.12   | 3.64   |
| 9.09   | 9.15   | -5.23  | -3.03  | -0.48  | -2.96  | -3.09  | -1.10  | -2.61  | -1.94  | -3.92  | -2.20  | -3.73  | -5.29  | -4.04  | -3.83  | -3.85  | 1.53   | 1.05   | 2.57   | 2.54   | 3.28   | 3.73   | 0.53   | 3.32   | 0.44   | 1.37   | 1.76   |
| -1.63  | -2.11  | 2.03   | 2.05   | 4.50   | 3.90   | 3.33   | 2.73   | 2.90   | 3.19   | 1.38   | 2.20   | 3.28   | 3.15   | 2.90   | 2.71   | 1.57   | 1.24   | 0.76   | 2.41   | 1.41   | 4.41   | 5.84   | 2.54   | 4.23   | 1.41   | 1.90   | 1.78   |
| -2.77  | -1.26  | 0.08   | 0.34   | 2.84   | 1.93   | 2.76   | 1.87   | 1.50   | 1.79   | 0.76   | 0.06   | -0.09  | -0.08  | 0.68   | 1.87   | 0.83   | 2.07   | 1.11   | -0.13  | -0.19  | -0.08  | 3.05   | -0.02  | 3.00   | 0.19   | -0.43  | 0.53   |
| 0.34   | 0.39   | 16.80  | 14.34  | 17.64  | 14.95  | 10.44  | 16.23  | 18.96  | 16.00  | 18.83  | 16.12  | 16.24  | 15.99  | 12.06  | 15.78  | 17.14  | -2.37  | 2.37   | -5.74  | -7.78  | -11.09 | -7.22  | -1.50  | -3.74  | -2.11  | 2.99   | -2.42  |
| 0.70   | 1.37   | 17.29  | 13.95  | 16.62  | 16.84  | 10.48  | 15.91  | 19.95  | 17.28  | 22.06  | 15.50  | 17.26  | 19.64  | 9.20   | 19.66  | 20.08  | -0.31  | 3.03   | -3.44  | -6.06  | -12.65 | -6.88  | 1.06   | -2.78  | 1.46   | 3.72   | -2.53  |
| -1.43  | -0.09  | -38.79 | -34.08 | -36.09 | -37.90 | -41.14 | -37.81 | -38.91 | -42.16 | -39.79 | -36.10 | -41.78 | -37.90 | -43.49 | -40.46 | -39.13 | -4.33  | -2.99  | -9.77  | -11.41 | -15.28 | -13.81 | -6.46  | -10.62 | -6.96  | -5.34  | -9.45  |
| -2.60  | -3.64  | -18.66 | -15.65 | -12.23 | -15.11 | -15.19 | -13.99 | -15.05 | -14.29 | -15.16 | -14.99 | -13.98 | -18.08 | -14.57 | -19.31 | -16.35 | 1.47   | 1.72   | 1.70   | 0.64   | 2.29   | 0.08   | -0.79  | 1.46   | 0.18   | -0.91  | 1.21   |
| -4.17  | -4.81  | -26.44 | -27.14 | -24.31 | -24.53 | -24.61 | -24.82 | -24.10 | -26.17 | -23.40 | -26.23 | -23.27 | -28.54 | -20.59 | -33.03 | -24.89 | 3.44   | 3.15   | 0.08   | 3.38   | 5.09   | 3.26   | 1.49   | 3.53   | 3.06   | 1.09   | 3.45   |
| -0.67  | 2.12   | -3.83  | -0.24  | -2.52  | -3.06  | -5.09  | -2.03  | -2.38  | -2.19  | -1.95  | 1.06   | -3.33  | -4.38  | -3.32  | -2.66  | -0.66  | 1.47   | 1.00   | 2.99   | 1.41   | 3.77   | -0.33  | 0.08   | 1.48   | 2.26   | 2.74   | -0.52  |
| -10.01 | -10.72 | -11.92 | -13.03 | -10.16 | -14.03 | -12.92 | -14.98 | -16.43 | -16.64 | -11.14 | -13.69 | -16.80 | -15.79 | -15.69 | -16.73 | -16.66 | -11.26 | -11.44 | -13.58 | -11.18 | -12.48 | -13.69 | -12.43 | -16.08 | -10.72 | -11.31 | -15.32 |
| 0.54   | 0.60   | 1.67   | 2.58   | 3.09   | 1.63   | 1.43   | 2.08   | 1.45   | 2.11   | 1.31   | 2.16   | 1.60   | 1.54   | 0.90   | 2.08   | 0.11   | 1.01   | 2.59   | 1.81   | 1.83   | 0.81   | 1.72   | 2.78   | 2.30   | 0.89   | 2.20   | 2.11   |
| -2.03  | 1.80   | 1.43   | 0.26   | 4.46   | 2.52   | 3.00   | 3.16   | 3.50   | 3.86   | 2.20   | 3.56   | 0.04   | 0.66   | 0.90   | 1.36   | 3.50   | -1.19  | 1.45   | 0.52   | 0.36   | 1.12   | -0.12  | 2.38   | 2.54   | 0.73   | 4.23   | 2.16   |
| -1.10  | -0.07  | -1.39  | 1.29   | 1.59   | 0.59   | 1.20   | 1.90   | 0.10   | -0.55  | -1.88  | -0.33  | 0.61   | 0.83   | 0.90   | 0.54   | -0.16  | -0.42  | 1.81   | 0.57   | -1.41  | 0.73   | 1.58   | 0.36   | 0.45   | -1.26  | 0.34   | 1.21   |
| -0.46  | -1.30  | -0.17  | -0.80  | 0.81   | 0.45   | 0.63   | -0.50  | -0.36  | 1.37   | -0.32  | -0.10  | -1.03  | -0.75  | 0.23   | 1.26   | -0.18  | -1.34  | -1.09  | -0.66  | -0.65  | 0.37   | -0.40  | -0.68  | -0.97  | -1.48  | -0.76  | 0.35   |
| -1.08  | 0.13   | 2.10   | 1.78   | 2.68   | 3.10   | 2.11   | 2.99   | 2.99   | 2.04   | 2.08   | 0.27   | 0.79   | 2.09   | 2.08   | 1.61   | 1.42   | -0.13  | 0.50   | 1.86   | 1.19   | 1.53   | 2.49   | 1.85   | 0.74   | 1.97   | 2.57   | 0.75   |
| -7.07  | -4.52  | -6.58  | -6.98  | -0.21  | -6.21  | -4.59  | -6.55  | -7.43  | -4.44  | -2.12  | -7.82  | -6.87  | -4.82  | -6.89  | -1.38  | -9.69  | -4.43  | -1.13  | -7.50  | 1.84   | -5.13  | -3.14  | -4.26  | 1.21   | -6.30  | -1.94  | -7.01  |
| -8.85  | -5.24  | -10.15 | -12.62 | -6.05  | -9.23  | -6.69  | -8.98  | -11.90 | -6.09  | -6.41  | -10.46 | -6.91  | -5.69  | -4.13  | -1.16  | -13.23 | -5.64  | -3.31  | -8.41  | 4.79   | -1.76  | -0.96  | -3.71  | 2.28   | -8.75  | -4.38  | -7.64  |
| -14.11 | -8.12  | -13.67 | -20.70 | -6.61  | -13.38 | -9     |        |        |        |        |        |        |        |        |        |        |        |        |        |        |        |        |        |        |        |        |        |

|        |        |        |        |        |        |        |        |        |        |        |        |        |        |        |        |        |       |        |        |        |        |        |        |        |        |        |        |       |
|--------|--------|--------|--------|--------|--------|--------|--------|--------|--------|--------|--------|--------|--------|--------|--------|--------|-------|--------|--------|--------|--------|--------|--------|--------|--------|--------|--------|-------|
| 1.95   | 3.21   | 1.64   | 3.68   | 5.38   | 1.84   | 1.97   | 1.28   | 1.09   | 2.28   | 0.82   | 0.57   | 2.60   | 0.43   | 0.27   | -0.61  | 0.75   | 4.48  | 4.80   | 4.40   | 7.22   | 4.10   | 5.59   | 3.48   | 3.60   | 3.17   | 4.06   | 4.33   |       |
| -2.40  | -1.32  | 0.32   | -0.11  | 4.04   | -0.26  | -0.06  | 0.30   | -0.80  | 0.58   | 0.48   | 0.26   | -0.95  | -0.06  | -0.07  | 1.31   | -0.74  | -1.33 | -0.22  | -1.76  | -1.54  | -2.20  | 2.00   | 0.04   | -1.29  | -2.03  | -0.23  | -0.26  | -0.55 |
| 5.91   | 3.57   | 2.44   | 2.58   | 4.79   | 2.05   | 1.75   | 2.76   | 3.11   | 1.12   | 2.41   | 2.96   | 1.64   | 0.21   | -0.08  | 1.10   | -0.39  | 2.65  | 0.44   | 2.66   | 1.95   | 2.86   | 3.11   | 2.46   | 3.20   | 2.30   | 3.76   | 2.02   |       |
| -6.11  | -7.49  | 2.70   | 2.06   | 5.84   | 3.57   | 4.37   | 3.52   | 4.11   | 2.89   | 2.56   | 0.18   | 1.23   | 2.43   | 4.23   | 3.57   | 0.55   | -2.52 | -1.13  | -2.24  | -4.54  | -5.02  | -1.09  | -0.89  | -3.59  | -2.88  | 1.32   | -1.20  |       |
| -4.97  | -4.16  | 2.39   | 1.31   | 6.25   | 3.34   | 3.95   | 4.07   | 3.22   | 3.25   | 2.02   | 1.34   | 1.63   | 2.19   | 4.41   | 3.63   | 2.38   | -1.20 | 0.75   | 0.14   | -1.02  | -2.08  | 1.44   | 0.06   | -1.46  | -0.69  | 1.30   | 1.70   |       |
| -1.46  | -2.30  | 1.97   | 2.12   | 5.07   | 2.75   | 1.48   | 1.38   | 2.68   | 1.10   | 2.65   | 1.52   | 2.38   | 2.81   | 3.84   | 2.20   | 2.11   | -1.72 | 1.38   | 1.49   | -0.19  | -1.22  | 1.92   | 0.76   | -1.59  | -1.61  | 1.96   | 1.03   |       |
| 2.82   | 0.90   | 4.32   | 4.65   | 5.39   | 3.68   | 4.81   | 5.08   | 4.18   | 4.15   | 1.59   | 3.75   | 3.00   | 2.22   | 1.81   | 2.43   | 1.89   | 3.26  | 2.97   | 4.69   | 1.71   | 6.55   | 6.33   | 3.59   | 4.76   | 3.34   | 4.22   | 5.76   |       |
| 6.86   | 6.28   | -0.77  | 1.41   | 1.65   | 0.78   | 0.45   | 1.34   | -1.04  | 0.73   | 0.44   | 0.81   | 1.29   | 0.70   | -0.46  | 1.94   | 2.54   | 2.53  | 1.91   | 3.18   | 2.81   | 4.36   | 4.25   | 1.43   | 2.49   | 2.94   | 2.49   | 4.43   |       |
| 2.06   | -0.48  | 4.91   | 2.56   | 2.69   | 2.29   | 4.17   | 3.89   | 0.76   | 2.41   | 3.88   | 2.41   | 2.22   | 2.39   | 4.05   | 2.29   | 3.45   | 1.30  | 0.44   | -0.20  | -1.06  | -4.54  | 0.50   | 0.60   | 1.47   | 1.74   | 0.73   | 0.31   |       |
| -6.62  | -15.18 | 15.39  | 15.83  | 16.80  | 14.52  | 14.54  | 15.31  | 20.43  | 13.34  | 19.67  | 17.87  | 16.64  | 15.23  | 16.67  | 16.42  | 13.75  | 2.65  | 12.08  | 4.19   | 0.23   | -7.05  | 5.93   | 7.12   | 4.79   | 4.54   | 13.55  | 1.61   |       |
| -8.89  | -23.81 | 29.06  | 27.74  | 27.40  | 28.28  | 27.34  | 25.52  | 34.71  | 23.71  | 30.19  | 24.66  | 26.60  | 27.47  | 27.64  | 21.12  | 26.23  | 2.53  | 16.30  | 2.86   | -5.03  | -17.00 | 6.07   | 9.97   | -2.10  | 4.40   | 19.29  | -0.09  |       |
| 3.98   | 12.27  | -7.72  | -9.20  | -6.69  | -8.77  | -8.77  | -10.32 | -12.44 | -8.18  | -12.18 | -8.38  | -11.97 | -11.43 | -16.87 | -10.62 | -10.08 | -2.50 | -6.48  | -8.29  | -8.22  | -11.75 | -5.50  | -6.60  | -10.68 | -3.74  | 5.50   | -6.83  |       |
| 1.39   | 1.08   | 5.32   | 4.57   | 8.06   | 4.43   | 4.83   | 5.92   | 7.05   | 6.55   | 6.98   | 5.57   | 6.18   | 4.84   | 0.04   | 6.72   | 3.96   | 0.01  | 2.91   | -0.08  | -9.03  | -10.59 | -4.55  | -0.21  | -7.24  | 0.35   | 3.67   | -1.81  |       |
| 1.59   | 2.40   | 11.01  | 10.08  | 13.17  | 9.36   | 9.33   | 12.46  | 14.12  | 13.07  | 13.10  | 10.52  | 12.69  | 13.46  | 4.99   | 12.90  | 10.52  | -0.03 | 3.85   | 0.50   | -10.32 | -13.62 | -6.36  | 0.40   | -8.55  | 1.80   | 4.33   | -2.71  |       |
| 1.33   | 0.06   | -26.37 | -23.28 | -24.52 | -28.10 | -28.29 | -24.90 | -25.92 | -27.74 | -25.49 | -23.06 | -28.30 | -27.71 | -33.54 | -27.24 | -25.72 | -3.45 | -3.94  | -6.52  | -11.72 | -8.10  | -8.16  | -9.15  | -13.71 | -5.88  | -8.20  | -7.19  |       |
| -2.11  | -1.28  | 1.06   | 1.70   | 5.13   | 0.56   | 1.79   | 1.32   | 0.55   | 1.99   | 0.24   | 1.85   | 1.21   | 0.83   | 1.14   | 2.22   | -0.67  | 0.17  | 1.40   | 1.36   | 2.47   | 1.44   | 3.99   | 1.48   | 3.30   | 1.24   | 0.52   | 0.99   |       |
| 0.47   | 0.23   | 0.18   | 0.32   | 2.68   | 0.16   | 0.78   | 0.53   | 0.66   | 0.90   | -1.06  | 0.36   | -0.17  | 0.08   | -0.27  | -0.68  | -0.23  | -0.18 | 0.31   | 0.32   | 0.01   | -1.15  | 1.64   | 1.17   | 0.71   | 0.61   | 0.95   | 1.24   |       |
| -4.44  | -1.58  | 2.32   | 1.84   | 3.84   | 2.31   | 1.79   | 1.77   | 1.69   | 1.10   | 0.77   | 1.76   | 1.59   | 1.02   | 3.02   | 3.84   | 0.50   | 1.02  | 3.34   | 2.93   | 0.74   | 3.00   | 3.21   | 1.22   | 1.40   | 0.77   | 1.05   | 1.17   |       |
| -0.92  | -0.01  | 2.40   | 2.15   | 5.68   | 1.48   | 1.08   | 3.53   | 2.29   | 3.24   | 0.38   | 0.92   | -0.35  | -1.87  | -10.91 | 1.83   | 2.38   | -0.65 | 1.00   | 1.06   | 0.80   | 1.30   | 3.80   | 0.31   | 0.89   | -0.56  | 2.32   | -0.10  |       |
| 0.91   | -0.32  | 2.50   | 2.30   | 5.86   | 2.16   | 2.69   | 2.10   | 1.90   | 2.78   | 0.67   | 1.09   | 1.89   | 2.25   | -1.16  | 1.65   | -0.52  | 0.06  | 0.27   | -0.09  | -0.55  | 1.57   | 1.72   | -0.20  | 1.36   | -0.04  | 0.60   | 0.46   |       |
| 2.27   | 0.38   | 3.24   | 2.52   | 6.79   | 4.38   | 4.67   | 4.31   | 4.70   | 5.69   | 2.33   | 2.50   | 2.41   | 2.67   | 18.77  | 2.14   | 3.06   | -1.07 | 0.71   | 0.48   | -0.38  | 1.55   | 2.52   | 1.71   | 4.46   | -1.35  | 2.16   | 1.42   |       |
| 2.00   | 0.97   | 0.84   | 0.95   | 5.59   | 1.35   | 1.60   | 1.00   | -0.08  | 1.05   | 1.12   | 0.83   | 1.36   | 1.21   | 0.25   | 0.26   | -0.94  | 2.44  | 1.67   | 3.23   | 2.58   | 3.32   | 3.57   | 3.14   | 3.45   | 1.42   | 1.65   | 4.43   |       |
| 0.77   | 2.20   | 0.63   | 1.76   | 3.20   | 0.91   | 1.59   | 1.70   | 2.57   | 0.73   | 1.04   | 1.90   | 1.30   | 0.91   | 1.39   | 0.51   | 1.43   | 2.08  | 2.31   | 1.78   | 3.10   | 2.96   | 3.10   | 1.85   | 1.92   | 2.33   | 2.94   | 3.66   |       |
| 0.61   | 1.83   | 0.75   | 0.59   | 4.15   | 1.39   | 1.06   | 1.17   | 1.95   | 2.88   | 1.83   | 2.21   | 1.83   | 1.07   | 1.82   | 0.02   | 0.40   | 1.26  | 1.88   | 2.37   | 1.26   | 2.28   | 2.93   | 2.59   | 2.43   | 1.39   | 2.37   | 5.43   |       |
| -1.31  | -1.38  | -0.09  | -0.09  | 1.97   | -0.03  | -0.78  | 2.40   | 0.21   | 0.48   | -1.17  | 0.72   | -0.84  | -1.37  | -0.77  | -1.61  | -0.54  | -2.07 | 0.76   | -1.54  | -0.97  | -0.94  | 1.14   | 0.43   | -0.10  | -3.55  | 0.61   | 0.41   |       |
| 0.22   | 1.28   | -2.36  | -1.41  | 0.77   | -0.79  | -1.21  | 0.44   | -0.43  | -0.09  | -1.98  | -0.90  | -0.81  | -1.89  | -1.59  | -0.61  | -1.17  | -0.02 | 0.07   | -0.81  | 0.34   | -0.27  | 2.89   | 0.10   | 1.74   | -0.04  | 0.96   | 1.96   |       |
| -0.21  | 0.95   | 3.07   | 2.83   | 6.08   | 2.34   | 2.64   | 3.41   | 2.77   | 3.22   | 2.60   | 3.74   | 2.58   | 2.81   | 3.18   | 1.88   | 1.84   | 0.40  | 2.41   | 2.74   | 0.44   | 1.10   | 4.63   | 3.68   | 6.12   | 1.75   | 1.61   | 3.01   |       |
| 10.00  | 9.33   | -4.55  | -1.52  | 0.17   | -2.43  | -1.10  | -0.07  | -2.06  | -0.49  | -3.98  | -0.38  | -2.60  | -3.97  | -3.88  | -2.88  | -1.39  | 1.14  | 0.63   | 2.18   | 2.33   | 3.66   | 3.73   | 0.12   | 1.94   | 0.37   | 1.59   | 2.31   |       |
| -2.12  | -2.67  | 2.42   | 1.37   | 4.12   | 3.57   | 2.32   | 2.82   | 2.63   | 3.16   | 2.13   | 1.23   | 3.05   | 3.03   | 2.57   | 2.63   | 1.99   | 1.30  | 1.08   | 3.21   | 1.75   | 4.32   | 5.92   | 2.41   | 4.53   | 2.41   | 2.99   | 2.63   |       |
| -1.66  | -0.74  | 0.68   | 0.59   | 4.43   | 1.42   | 2.41   | 2.10   | 0.39   | 0.76   | -0.36  | 0.23   | -0.45  | 0.01   | 1.36   | 1.53   | 0.03   | 1.77  | 0.27   | 0.77   | -0.33  | -0.25  | 3.04   | -0.15  | 2.35   | 0.06   | 2.20   | 1.42   |       |
| 0.13   | 1.22   | 15.24  | 12.69  | 16.99  | 16.18  | 10.98  | 15.66  | 17.59  | 13.72  | 16.00  | 13.45  | 15.29  | 15.08  | 11.45  | 16.03  | 15.88  | -1.07 | 3.48   | -4.37  | -8.11  | -11.88 | -7.01  | 0.12   | -4.27  | -0.69  | 4.59   | -3.04  |       |
| 0.69   | 2.14   | 16.94  | 12.32  | 16.05  | 16.43  | 10.79  | 15.64  | 18.38  | 15.86  | 20.57  | 13.30  | 16.53  | 18.70  | 9.27   | 18.23  | 18.13  | 0.69  | 3.93   | -4.87  | -6.02  | -12.74 | -8.81  | 1.42   | -2.01  | 1.71   | 4.78   | -3.14  |       |
| -2.05  | 0.43   | -37.59 | -31.82 | -35.70 | -37.86 | -42.45 | -37.18 | -37.99 | -40.74 | -36.33 | -31.80 | -39.76 | -37.23 | -44.50 | -40.34 | -35.50 | -5.62 | -5.85  | -11.99 | -14.30 | -18.85 | -15.62 | -10.77 | -14.74 | -9.37  | -8.13  | -15.18 |       |
| -3.72  | -3.54  | -18.88 | -14.47 | -12.10 | -16.29 | -17.07 | -13.74 | -13.30 | -13.28 | -14.31 | -13.34 | -12.06 | -17.03 | -16.14 | -18.51 | -15.97 | 1.02  | 0.65   | -0.37  | 0.95   | 1.48   | 0.80   | -1.13  | 1.22   | -0.20  | -2.37  | 0.06   |       |
| -2.91  | -4.48  | -26.46 | -25.52 | -24.15 | -26.21 | -25.07 | -24.68 | -23.24 | -24.99 | -22.95 | -24.72 | -22.56 | -27.83 | -22.06 | -30.39 | -24.56 | 2.69  | 0.32   | -0.84  | 2.11   | 4.98   | 2.38   | 3.30   | 1.12   | 2.10   | -2.39  | 1.45   |       |
| -0.70  | -1.72  | -3.54  | 0.34   | -1.46  | -2.42  | -6.32  | -1.03  | -2.87  | -0.83  | -0.79  | 1.03   | -3.12  | -2.94  | -4.64  | -3.37  | -0.48  | 1.88  | 1.82   | 3.86   | 1.24   | 2.29   | -0.60  | 1.58   | 0.92   | 1.79   | 3.77   | -0.10  |       |
| -10.24 | -12.49 | -13.61 | -14.18 | -12.09 | -16.38 | -15.67 | -17.83 | -19.18 | -19.08 | -12.07 | -14.80 | -18.83 | -16.96 | -14.64 | -19.55 | -17.57 | -1.16 | -12.50 | -14.64 | -13.77 | -16.80 | -15.69 | -15.27 | -18.45 | -11.89 | -13.67 | -16.34 |       |
| 0.64   | 0.12   | 1.30   | 2.28   | 3.59   | 1.50   | 1.83   | 3.01   | 1.85   | 2.90   | 1.25   | 1.68   | 2.11   | 2.88   | 1.17   | 2.15   | 0.56   | 0.68  | 2.41   | 1.59   | 2.55   | 0.36   | 3.12   | 2.96   | 2.24   | 1.44   | 1.38   | 1.84   |       |
| -0.42  | 0.81   | 3.46   | 0.08   | 6.14   | 4.28   | 3.61   | 2.94   | 4.61   | 3.30   | 2.55   | 4.02   | 2.71   | 1.43   | 1.08   | 3.03   | 3.62   | -0.04 | 1.37   | 2.77   | 0.08   | -0.20  | 0.41   | 3.26   | 3.38   | 2.46   | 2.61   | 2.67   |       |
| -0.85  | -0.82  | -0.65  | 0.49   | 2.84   | 1.12   | 1.25   | 0.67   | -0.83  | -0.50  | -0.16  | -0.40  | 0.43   | 0.46   | 0.98   | 0.12   | -1.06  | -0.57 | 0.85   | 1.24   | -0.54  | 0.35   | 1.94   | 0.12   | 1.54   | -0.80  | 0.69   | 0.68   |       |
| -1.33  | -1.36  | 0.18   | -0.53  | 1.02   | -1.18  | 0.65   | 0.01   | -0.20  | 1.79   | -0.56  | -0.21  | -0.86  | -0.31  | -0.39  | 0.51   | 0.56   | -0.66 | -0.56  | -0.58  | -1.08  | 0.72   | 0.43   | -0.25  | -1.21  | -1.66  | -1.25  | 1.29   |       |
| -0.61  | 0.93   | 1.92   | 1.27   | 3.50   | 2.23   | 1.26   | 3.43   | 1.66   | 1.88   | -0.28  | 0.03   | 1.94   | 2.63   | 2.04   | 1.54   | 1.57   | 0.55  | -0.30  | 2.29   | 2.57   | 0.50   | 3.60   | 1.02   | 1.43   | 2.50   | 2.52   | 1.73   |       |
| -3.11  | -4.24  | -7.49  | -8.60  | -9.92  | -7.88  | -5.26  | -4.64  | -4.51  | -7.88  | -8.56  | -8.33  | -8.31  | -5.15  | 0.21   | -2.50  | -9.52  | -4.96 | -2.00  | -3.29  | 0.22   | -10.67 | -9.43  | -3.23  | 1.33   | 5.62   | -1.16  | -6.96  |       |
| -3.47  | -5.61  | -11.72 | -14.44 | -6.31  | -10.83 | -7.43  | -8.41  | -7.66  | -10.26 | -15.01 | -12.50 | -11.72 | -6.91  | 0.98   | -2.02  | -14.31 | -6.37 | -2.04  | -1.74  | 4.63   | -6.75  | -5.88  | -4.18  | 3.21   | -8.28  | -4.21  | -5.87  |       |
| -3.77  | -7.79  | -15.40 | -23.45 | -10.96 | -16.57 | -10.88 | -15.17 | -14.33 | -13.95 | -22.13 | -21.31 | -19.83 | -10.79 | 2.05   | -5.07  | -24.60 | -5.97 | -1.79  | -1.59  | 4.03   | -3.97  | -4.94  | -2.47  | 5.77   | -9.06  | -7.47  | -9.14  |       |
| -2.72  | -0.81  | 5.00   | 5.04   | 5.90   | 4.19   | 0.28   | 2.35   | 4.56   | 2.78   | 5.24   | 3.23   | 4.52   | 3.22   | 0.37   | 4.23   | 3.22   | -2.70 | 3.35   | -5.59  | -6.42  | -13.17 | -8.08  | -4.20  | -5.77  | -1.82  | 3.26   | -3.56  |       |
| -2.54  | -2.02  | 5.30   | 5.57   | 6.26   | 4.43   | -0.45  | 1.33   | 6.12   | 3.39   | 6.72   | 3.94   | 4.03   | 3.54   | -0.79  | 2.70   | 2.72   | -3.76 | 2.84   | -7.83  | -7.76  | -18.50 | -13.32 | -3.97  | -9.10  | -3.41  | 4.83   | -6.68  |       |
| 7.08   | 10.62  | -16.60 | -11.78 |        |        |        |        |        |        |        |        |        |        |        |        |        |       |        |        |        |        |        |        |        |        |        |        |       |

|        |        |        |        |        |        |        |        |        |        |        |        |        |        |        |        |        |        |        |        |        |        |        |        |        |        |        |        |
|--------|--------|--------|--------|--------|--------|--------|--------|--------|--------|--------|--------|--------|--------|--------|--------|--------|--------|--------|--------|--------|--------|--------|--------|--------|--------|--------|--------|
| -7.16  | -7.93  | 1.63   | 0.59   | 5.02   | 1.18   | 2.70   | 2.54   | 2.52   | 1.10   | 1.47   | -1.12  | 0.24   | -0.10  | 2.34   | 1.28   | 0.31   | -2.58  | -0.13  | -1.32  | -3.38  | -4.10  | -1.13  | 0.12   | -1.72  | -2.95  | 1.25   | -0.37  |
| -5.19  | -5.10  | 2.09   | 0.81   | 4.97   | 2.35   | 3.53   | 2.58   | 2.82   | 2.20   | 0.39   | 0.55   | 0.53   | 1.63   | 3.97   | 2.65   | 1.46   | -1.15  | -0.21  | 1.22   | -1.59  | -2.13  | 1.97   | 1.20   | -1.45  | -0.24  | 1.50   | 1.50   |
| -2.70  | -2.56  | 0.36   | 2.54   | 4.57   | 2.54   | 0.77   | 1.55   | 3.02   | 1.15   | 2.03   | 0.88   | 1.63   | 3.15   | 3.38   | 2.62   | 1.77   | -0.58  | 1.85   | 1.92   | -0.26  | -1.88  | 1.57   | 1.06   | -0.35  | -0.74  | 1.81   | 2.18   |
| 2.81   | 0.86   | 4.09   | 4.00   | 7.30   | 2.02   | 4.85   | 6.79   | 5.28   | 3.38   | 0.57   | 3.77   | 4.00   | 2.89   | 2.75   | 4.30   | 1.80   | 1.94   | 3.45   | 3.05   | 0.69   | 7.45   | 6.54   | 3.78   | 5.00   | 3.44   | 5.18   | 4.86   |
| 7.51   | 6.77   | 0.84   | 2.64   | 2.11   | 1.47   | 1.55   | 1.66   | -0.89  | 2.83   | 1.34   | 1.10   | 1.85   | 1.09   | 0.79   | 2.72   | 1.86   | 2.65   | 1.69   | 2.86   | 3.59   | 3.42   | 3.75   | 1.09   | 1.67   | 2.26   | 0.97   | 4.46   |
| 1.67   | 0.59   | 3.58   | 1.11   | 2.64   | 2.66   | 4.26   | 3.55   | -0.43  | 3.05   | 2.66   | 2.09   | 1.87   | 2.97   | 4.10   | 3.85   | 1.16   | 2.10   | 2.09   | 1.29   | 0.02   | -3.29  | 0.36   | -1.11  | 1.48   | 1.91   | -0.29  | 0.58   |
| -7.28  | -15.24 | 12.47  | 13.69  | 14.19  | 11.11  | 12.02  | 12.68  | 17.21  | 11.52  | 14.37  | 13.21  | 13.77  | 10.53  | 12.68  | 12.80  | 10.96  | 3.88   | 17.29  | 5.94   | 1.08   | -5.37  | 7.54   | 11.23  | 8.89   | 7.28   | 18.19  | 4.89   |
| -9.31  | -24.04 | 23.70  | 21.63  | 24.26  | 22.27  | 22.51  | 19.88  | 27.90  | 17.94  | 22.03  | 19.17  | 21.21  | 20.94  | 19.65  | 20.96  | 20.46  | 6.40   | 24.25  | 7.95   | -2.67  | -15.74 | 10.03  | 10.32  | 3.13   | 8.36   | 25.47  | 3.66   |
| 3.58   | 12.53  | -5.71  | -7.08  | -5.94  | -7.67  | -8.12  | -8.40  | -10.10 | -5.24  | -9.06  | -7.89  | -10.88 | -8.74  | -13.71 | -7.14  | -6.16  | -6.23  | -10.42 | -10.71 | -9.37  | -14.39 | -8.56  | -10.63 | -14.79 | -5.26  | -8.71  | -8.74  |
| 1.66   | 0.86   | 4.31   | 3.74   | 7.09   | 3.76   | 3.83   | 5.59   | 5.72   | 5.62   | 6.02   | 4.44   | 5.66   | 3.25   | -1.15  | 5.89   | 4.25   | 0.21   | 4.08   | 1.11   | -8.42  | -9.95  | -5.19  | 1.38   | -7.30  | 1.64   | 3.86   | 0.20   |
| 2.18   | 2.42   | 9.95   | 8.90   | 12.77  | 7.50   | 7.84   | 11.23  | 12.78  | 11.55  | 10.72  | 9.25   | 10.88  | 11.10  | 3.52   | 11.79  | 9.26   | 0.51   | 6.63   | 0.19   | -10.01 | -14.54 | -5.61  | 0.77   | -8.51  | 3.39   | 6.25   | 1.16   |
| -0.12  | -0.37  | -23.77 | -21.04 | -22.06 | -26.12 | -26.75 | -20.79 | -22.98 | -24.36 | -23.68 | -19.99 | -24.70 | -26.41 | -29.74 | -25.06 | -24.26 | -4.79  | -10.28 | -9.58  | -13.26 | -10.29 | -10.83 | -14.82 | -16.76 | -8.37  | -13.34 | -9.40  |
| -2.07  | -1.55  | 0.83   | 1.23   | 6.31   | 0.50   | 1.58   | 1.35   | 0.39   | 1.44   | 0.65   | 1.46   | 1.44   | 0.60   | 1.08   | 2.12   | -0.23  | 0.20   | 1.48   | 1.92   | 1.87   | 2.10   | 2.22   | 1.56   | 2.87   | 1.32   | 1.72   | 0.04   |
| 0.81   | 0.91   | -0.25  | 0.48   | 2.48   | 0.11   | 0.03   | 0.47   | 1.50   | 0.84   | -1.32  | 0.25   | -0.69  | -0.05  | -0.43  | -0.73  | -0.62  | -0.06  | 0.77   | 0.85   | 0.07   | 0.61   | 2.35   | 0.88   | 0.74   | 0.14   | -0.02  | 1.17   |
| -4.79  | -2.07  | 2.06   | 1.24   | 5.93   | 1.89   | 2.37   | 1.58   | 2.14   | 1.87   | 0.41   | 1.23   | 1.97   | 0.06   | 2.77   | 3.09   | 2.05   | 0.92   | 2.59   | 3.33   | 1.28   | 0.87   | 3.49   | 1.87   | 1.89   | 1.03   | 1.00   | 2.28   |
| -1.63  | 0.48   | 2.42   | 2.57   | 5.94   | 1.24   | 1.88   | 2.79   | 2.15   | 2.93   | -0.76  | 0.99   | -0.10  | -2.07  | -12.07 | 1.82   | 3.13   | -1.11  | 2.77   | 1.11   | 0.80   | 0.77   | 3.70   | 1.70   | 1.46   | -0.27  | 2.34   | -0.14  |
| 0.46   | -0.50  | 2.50   | 2.39   | 6.10   | 2.44   | 3.16   | 3.23   | 3.25   | 2.88   | 1.26   | 1.19   | 1.94   | 2.23   | -1.17  | 2.16   | 0.59   | 0.04   | -0.06  | 0.14   | -0.60  | 0.07   | 0.30   | -0.36  | 0.71   | -0.68  | 0.79   | -0.80  |
| 0.29   | -0.11  | 3.51   | 3.42   | 8.18   | 5.24   | 4.61   | 4.78   | 4.95   | 4.66   | 2.63   | 2.44   | 2.15   | 2.88   | 18.19  | 3.59   | 2.42   | -0.79  | 0.27   | 1.35   | -0.59  | 0.11   | 0.24   | 0.31   | 3.12   | -1.38  | 0.90   | 1.54   |
| 2.68   | 0.66   | 1.09   | 0.76   | 0.95   | 1.31   | 2.10   | 1.62   | 0.26   | 1.01   | 2.28   | 1.56   | 1.79   | 0.88   | 2.61   | 0.71   | 0.00   | 2.81   | 1.37   | 3.80   | 1.65   | 3.76   | 4.23   | 3.38   | 3.24   | 2.32   | 1.78   | 3.03   |
| 0.88   | 2.79   | 1.95   | 2.26   | 3.53   | 0.62   | 1.65   | 1.19   | 2.89   | 1.10   | 0.65   | 2.10   | 2.03   | 1.17   | 1.04   | 0.74   | 1.59   | 1.78   | 2.73   | 1.61   | 2.71   | 3.34   | 1.94   | 1.57   | 1.70   | 2.18   | 2.81   | 3.67   |
| 1.11   | 1.52   | 1.81   | 0.26   | 5.19   | 0.75   | 1.48   | 1.40   | 2.03   | 3.07   | 1.20   | 0.87   | 0.25   | 1.28   | 2.09   | 2.01   | 0.99   | 1.19   | 1.58   | 2.05   | 1.09   | 2.71   | 2.43   | 2.76   | 2.41   | 1.00   | 2.12   | 4.84   |
| -1.61  | -1.21  | 0.15   | 0.76   | 3.54   | -0.17  | -1.33  | 2.79   | 1.81   | -0.86  | -1.46  | 0.84   | -0.63  | -1.31  | -0.83  | -4.07  | -2.92  | -2.26  | 0.50   | -1.74  | -0.42  | -1.59  | 1.49   | 0.85   | -1.32  | -2.34  | 0.23   | -0.48  |
| -0.19  | 0.12   | -0.59  | -0.92  | 2.01   | 0.49   | 0.51   | 0.88   | 0.88   | 1.36   | -1.20  | -0.17  | 0.54   | -1.27  | -0.59  | 0.69   | 0.30   | -0.36  | -1.69  | 0.07   | -0.65  | 1.80   | -0.06  | 1.19   | -1.13  | -0.25  | 2.41   |        |
| 0.09   | 1.35   | 2.88   | 2.89   | 5.22   | 2.62   | 2.10   | 3.77   | 3.48   | 4.44   | 2.30   | 1.48   | 1.65   | 3.03   | 3.38   | 3.32   | 2.48   | 0.19   | 2.54   | 3.19   | 2.32   | 2.85   | 5.07   | 4.00   | 5.10   | 3.18   | 1.54   | 3.60   |
| 10.77  | 9.71   | -3.78  | -0.18  | 1.59   | -1.37  | -0.62  | 1.00   | -0.47  | 1.17   | -2.63  | 0.16   | -1.14  | -1.92  | -1.06  | -2.07  | -2.03  | 1.75   | -0.50  | 1.88   | 2.54   | 4.82   | 3.79   | -0.86  | 1.43   | 0.69   | -0.75  | 1.53   |
| -2.91  | -2.63  | 2.34   | 1.72   | 4.48   | 3.13   | 2.95   | 3.26   | 2.55   | 3.40   | 1.59   | 1.28   | 2.45   | 2.02   | 2.39   | 2.83   | 1.65   | 1.29   | 1.54   | 3.33   | 2.54   | 6.04   | 6.14   | 2.70   | 4.52   | 1.45   | 2.49   | 2.40   |
| -1.10  | -1.18  | 0.70   | 1.14   | 4.65   | 1.95   | 2.06   | 2.30   | 0.74   | 1.74   | 0.44   | -1.19  | -0.34  | -1.61  | 1.17   | 2.38   | -0.11  | 2.07   | 0.42   | -0.06  | -0.13  | 0.96   | 2.63   | 1.55   | 1.98   | 0.86   | 0.85   | 1.30   |
| 0.66   | 1.05   | 12.60  | 11.12  | 15.50  | 13.61  | 9.99   | 14.43  | 14.28  | 11.83  | 13.71  | 11.29  | 12.64  | 13.59  | 10.05  | 13.43  | 12.92  | -0.54  | 5.83   | -4.21  | -7.26  | -12.66 | -7.09  | 1.48   | -3.33  | 0.09   | 5.51   | -1.82  |
| 0.63   | 2.11   | 14.03  | 10.03  | 13.53  | 14.51  | 9.90   | 13.27  | 15.66  | 12.69  | 15.90  | 11.66  | 14.39  | 15.94  | 8.93   | 15.72  | 16.40  | 1.10   | 6.94   | -3.92  | -6.51  | -14.36 | -9.36  | 3.65   | -2.52  | 2.13   | 7.45   | -1.46  |
| -1.37  | -7.09  | -35.00 | -27.85 | -32.49 | -35.66 | -39.59 | -34.27 | -34.02 | -35.32 | -34.93 | -28.12 | -36.03 | -34.73 | -41.45 | -36.24 | -33.97 | -7.95  | -13.75 | -15.95 | -17.80 | -23.30 | -18.63 | -17.30 | -20.07 | -13.40 | -17.79 | -19.06 |
| -2.73  | -2.77  | -16.62 | -13.65 | -11.48 | -14.93 | -15.13 | -11.60 | -12.69 | -12.91 | -14.70 | -13.53 | -9.93  | -17.06 | -14.63 | -17.63 | -14.34 | 0.94   | -1.52  | -1.52  | -1.17  | 0.76   | -1.13  | -4.10  | 0.27   | -0.57  | -5.39  | -1.46  |
| -3.78  | -4.42  | -25.35 | -24.92 | -24.39 | -25.53 | -24.47 | -24.17 | -21.04 | -23.32 | -21.48 | -22.80 | -20.53 | -28.33 | -21.61 | -29.03 | -23.59 | 1.70   | -4.78  | -3.49  | -0.71  | 3.55   | -0.47  | -4.70  | -1.44  | 0.29   | -6.99  | -1.26  |
| 0.92   | 1.11   | -2.71  | -0.47  | -2.66  | -2.70  | -0.60  | -0.50  | -1.41  | -0.85  | -0.44  | 1.31   | -2.44  | -3.90  | -3.71  | -2.74  | -0.40  | 0.75   | 0.93   | 1.86   | 1.63   | 3.72   | 1.26   | 1.47   | -1.85  | 0.17   | 2.83   | -0.86  |
| -11.98 | -13.29 | -16.15 | -16.63 | -13.65 | -18.48 | -17.52 | -20.09 | -20.52 | -20.23 | -15.07 | -17.00 | -20.10 | -20.36 | -19.90 | -21.32 | -20.03 | -13.73 | -13.43 | -16.25 | -14.21 | -16.31 | -18.99 | -15.18 | -20.77 | -13.77 | -14.88 | -18.55 |
| 1.11   | 0.82   | 2.02   | 1.62   | 3.52   | 1.58   | 1.38   | 2.57   | 1.69   | 3.15   | 1.71   | 1.83   | 2.25   | 1.41   | 1.02   | 2.74   | 1.41   | 0.98   | 2.32   | 1.51   | 2.38   | 1.89   | 2.67   | 4.62   | 2.82   | 2.00   | 1.38   | 2.93   |
| -0.14  | 1.07   | 2.74   | 1.08   | 6.54   | 4.34   | 3.71   | 3.62   | 4.30   | 4.74   | 0.99   | 3.86   | 2.56   | 1.48   | 2.23   | 4.17   | 5.44   | -0.03  | 2.67   | 2.70   | -0.38  | 0.80   | 1.19   | 4.31   | 3.80   | 1.72   | 2.50   | 2.46   |
| -0.81  | -1.26  | -0.30  | 1.03   | 2.49   | 0.08   | 1.05   | 2.30   | -1.43  | -0.65  | -0.75  | 0.27   | 0.26   | 0.28   | 2.84   | 1.04   | -0.08  | 0.15   | 0.63   | 0.68   | -0.70  | 0.67   | 1.14   | 1.19   | 0.76   | 0.77   | 0.91   | 0.08   |
| -1.26  | -2.24  | 0.07   | -0.57  | 0.68   | -0.34  | -0.07  | -0.20  | 0.46   | 0.89   | -0.91  | -0.03  | -0.40  | -0.08  | 0.40   | 0.33   | -0.26  | -0.98  | -0.84  | -0.10  | -1.11  | 0.38   | 0.44   | -0.14  | -0.87  | -2.43  | 0.72   | 0.80   |
| -1.09  | 0.68   | 1.72   | 1.59   | 1.70   | 2.32   | 1.09   | 3.91   | 3.19   | 2.94   | 0.90   | -0.05  | 2.76   | 0.89   | 2.41   | 2.31   | 1.56   | 0.59   | -0.48  | 3.12   | 2.32   | 1.57   | 3.17   | 1.52   | 0.93   | 1.04   | 1.92   | 1.30   |
| -3.21  | -4.30  | -8.43  | -9.83  | -1.48  | -8.08  | -6.40  | -3.17  | -9.29  | -4.19  | -3.65  | -10.21 | -8.57  | -5.72  | -0.65  | -4.04  | -10.52 | -5.23  | 0.10   | -5.61  | -3.67  | -4.70  | -5.91  | -4.01  | 1.45   | -6.23  | -1.51  | -7.75  |
| -4.18  | -4.99  | -12.06 | -15.53 | -8.06  | -12.46 | -9.42  | -8.00  | -14.33 | -6.22  | -8.54  | -14.50 | -12.72 | -7.70  | 1.27   | -4.82  | -15.53 | -6.77  | -1.77  | -8.61  | -0.64  | -2.08  | -3.06  | -5.43  | 3.22   | -8.70  | -4.58  | -6.26  |
| -3.47  | -7.80  | -18.97 | -24.86 | -14.17 | -18.50 | -15.12 | -15.25 | -21.53 | -7.32  | -14.79 | -24.20 | -21.56 | -11.84 | 0.68   | -9.77  | -25.06 | -6.54  | -3.15  | -9.65  | 2.30   | 1.08   | -2.65  | -5.77  | 5.95   | -10.70 | -7.91  | -10.06 |
| -3.09  | -1.69  | 3.87   | 2.90   | 3.37   | 2.00   | -0.36  | 1.37   | 3.50   | 2.11   | 3.46   | 2.72   | 2.75   | 1.32   | -0.36  | 9.97   | 2.60   | -2.21  | 3.89   | -4.86  | -9.41  | -14.15 | -8.45  | -2.23  | -5.26  | -0.91  | 4.82   | -3.39  |
| -2.77  | -2.35  | 3.91   | 4.87   | 4.60   | 3.13   | -2.22  | 0.13   | 4.48   | 2.07   | 4.38   | 3.10   | 2.37   | 1.53   | -2.27  | 1.72   | 1.71   | -3.42  | 4.71   | -7.44  | -8.94  | -19.05 | -13.71 | -3.16  | -8.93  | -3.11  | 6.43   | -6.56  |
| 8.58   | 9.47   | -10.99 | -12.37 | -9.37  | -11.34 | -12.84 | -10.13 | -12.53 | -12.19 | -13.34 | -9.92  | -11.62 | -12.68 | -14.06 | -12.61 | -9.76  | -4.95  | -13.67 | -7.50  | -8.92  | -13.47 | -7.72  | -11.20 | -15.01 | -9.66  | -13.70 | -7.47  |
| -1.76  | -0.09  | 5.03   | 4.41   | 9.36   | 5.64   | 6.19   | 5.67   | 4.28   | 7.12   | 2.59   | 4.57   | 3.67   | 5.12   | -0.29  | 6.10   | 2.73   | 0.04   | 4.26   | 2.00   | 3.25   | 0.90   | 6.77   | 4.17   | 0.24   | 0.87   | 3.50   | 1.00   |
| 1.82   | -2.34  | 56.09  | 54.23  | 54.87  | 53.55  | 54.88  | 54.99  | 57.27  | 52.58  | 53.18  | 49.92  | 55.80  | 55.89  | 56.85  | 59.37  | 53.54  | 5.83   | 23.41  | 7.72   | 6.10   | -4.56  | 3.23   | 21.73  | 12.14  | 7.97   | 28.62  | 5.22   |
| 5.03   | 1.     |        |        |        |        |        |        |        |        |        |        |        |        |        |        |        |        |        |        |        |        |        |        |        |        |        |        |

|        |        |        |        |        |        |        |        |        |        |        |        |        |        |        |        |        |        |        |        |        |        |        |        |        |        |        |        |
|--------|--------|--------|--------|--------|--------|--------|--------|--------|--------|--------|--------|--------|--------|--------|--------|--------|--------|--------|--------|--------|--------|--------|--------|--------|--------|--------|--------|
| 3.02   | 1.03   | 5.01   | 4.93   | 6.53   | 4.91   | 6.14   | 6.14   | 4.18   | 3.75   | 2.68   | 2.84   | 3.13   | 3.69   | 3.03   | 4.38   | 2.41   | 3.59   | 4.54   | 5.34   | 1.81   | 7.48   | 6.48   | 3.03   | 4.85   | 3.07   | 5.98   | 5.28   |
| 8.07   | 7.40   | 1.63   | 1.72   | 3.74   | 2.30   | 2.79   | 6.08   | 0.91   | 4.68   | 1.96   | 2.38   | 3.03   | 2.39   | 1.73   | 3.24   | 2.21   | 2.05   | 1.17   | 1.52   | 1.99   | 3.60   | 4.14   | 6.07   | 1.37   | 1.46   | 0.88   | 3.46   |
| 2.61   | -0.48  | 3.57   | 1.95   | 2.81   | 2.62   | 3.82   | 4.18   | -0.74  | 1.20   | 2.62   | 2.80   | 2.92   | 1.74   | 3.62   | 3.50   | 2.59   | 3.23   | 1.71   | 2.89   | 1.13   | -2.71  | 1.87   | 1.64   | 3.23   | 1.68   | 0.83   | -0.53  |
| -7.37  | -16.14 | 10.08  | 10.12  | 12.05  | 8.50   | 9.10   | 10.88  | 12.80  | 8.35   | 11.29  | 10.46  | 9.94   | 8.28   | 8.28   | 9.47   | 8.78   | 7.10   | 24.14  | 10.19  | 4.14   | -4.22  | 12.41  | 17.63  | 16.59  | 10.22  | 25.48  | 9.15   |
| -9.74  | -24.97 | 18.55  | 16.47  | 20.27  | 17.60  | 17.86  | 14.47  | 21.43  | 14.36  | 16.56  | 14.37  | 15.94  | 14.82  | 13.19  | 15.77  | 15.22  | 10.26  | 33.78  | 16.55  | 2.53   | -14.16 | 17.49  | 26.50  | 15.72  | 14.53  | 35.94  | 9.51   |
| 4.83   | 13.36  | -4.41  | -5.51  | -3.14  | -4.68  | -5.37  | -5.43  | -6.02  | -4.32  | -6.24  | -4.43  | -7.52  | -5.13  | -9.80  | -9.00  | -5.60  | -7.28  | 13.74  | -14.21 | -13.68 | -18.26 | -9.66  | -15.52 | -19.90 | -9.65  | -12.45 | -12.24 |
| 1.32   | 1.34   | 4.50   | 3.38   | 6.90   | 3.55   | 3.23   | 5.73   | 6.27   | 4.88   | 4.84   | 3.67   | 4.72   | 3.26   | -1.10  | 4.74   | 3.37   | 0.50   | 6.34   | 2.62   | -8.17  | -10.44 | -5.08  | 1.31   | -9.19  | 0.34   | 6.78   | -0.31  |
| 1.78   | 2.52   | 8.62   | 7.37   | 10.74  | 6.69   | 7.10   | 10.25  | 10.53  | 10.10  | 9.59   | 8.77   | 9.86   | 10.99  | 2.48   | 9.74   | 7.71   | 1.26   | 11.04  | 2.61   | -9.35  | -14.89 | -5.40  | 4.96   | -10.07 | 3.76   | 10.57  | 1.34   |
| -0.12  | -0.10  | -20.22 | -18.59 | -18.21 | -20.92 | -23.70 | -16.94 | -19.26 | -21.68 | -20.38 | -19.63 | -22.17 | -23.35 | -27.69 | -22.11 | -20.90 | -7.60  | -19.95 | -17.54 | -13.06 | -14.24 | -25.20 | -25.13 | -14.17 | -21.94 | -13.81 | -0.10  |
| -1.89  | -1.75  | 0.52   | 1.86   | 6.31   | 0.36   | 1.55   | 1.37   | 1.49   | 2.78   | 0.67   | 1.38   | 1.50   | 1.01   | 0.70   | 2.93   | -0.16  | 0.16   | 1.72   | 2.37   | 1.18   | 1.37   | 4.17   | 1.41   | 3.45   | 1.03   | 2.49   | 0.43   |
| 0.47   | 0.72   | -0.04  | 0.61   | 3.07   | 0.57   | -0.48  | 0.69   | 1.03   | 0.69   | -0.56  | 0.22   | -1.03  | -0.02  | 0.18   | -0.32  | 0.49   | -0.60  | 0.62   | -0.09  | 0.52   | 2.53   | 1.11   | 1.16   | 0.43   | 0.34   | 1.96   | 0.43   |
| -5.17  | -2.18  | 2.72   | 1.44   | 5.46   | 2.25   | 3.06   | 2.11   | 2.24   | 0.80   | 0.64   | 0.99   | 1.75   | 0.55   | 2.57   | 2.85   | 1.33   | 1.46   | 4.05   | 3.30   | 1.59   | 2.59   | 3.35   | 1.57   | 1.62   | 0.84   | 3.19   | 1.89   |
| -1.55  | 0.75   | 2.19   | 2.20   | 5.80   | 1.65   | 1.00   | 4.44   | 2.68   | 3.32   | -0.70  | 2.34   | -1.52  | -1.85  | -11.97 | 2.92   | 2.84   | -0.33  | 2.82   | 2.01   | 1.61   | 1.82   | 4.51   | 1.52   | 1.60   | 0.28   | 1.61   | 0.94   |
| 0.57   | -0.19  | 3.26   | 2.06   | 7.33   | 3.03   | 3.77   | 2.52   | 2.16   | 3.57   | 1.34   | 0.59   | 2.59   | 2.27   | -1.27  | 1.63   | 0.32   | -0.67  | -0.76  | 0.11   | -0.79  | 0.68   | 1.30   | -0.40  | 2.01   | -0.81  | 1.45   | -0.01  |
| -0.13  | -1.02  | 0.55   | 3.23   | 9.43   | 5.78   | 5.17   | 4.38   | 5.66   | 4.83   | 1.83   | 3.01   | 2.98   | 3.36   | 18.89  | 2.79   | 1.12   | -1.58  | 0.78   | 0.77   | -0.36  | -0.69  | 2.27   | 0.43   | 3.68   | -0.29  | 1.52   | 1.62   |
| 2.85   | 1.30   | 1.10   | 1.71   | 1.72   | 1.88   | 2.01   | 1.92   | 0.02   | 0.90   | 2.43   | 1.29   | 1.61   | 1.87   | 1.16   | 0.79   | 0.84   | 1.90   | 1.81   | 2.13   | 2.70   | 3.88   | 3.83   | 3.42   | 3.33   | 1.01   | 2.40   | 2.54   |
| 1.36   | 2.72   | 2.18   | 2.13   | 3.83   | 1.72   | 2.87   | 2.70   | 3.23   | 1.79   | 1.31   | 2.50   | 2.23   | 1.15   | 2.26   | 1.58   | 1.82   | 1.77   | 2.65   | 1.89   | 2.32   | 3.19   | 2.45   | 1.67   | 2.66   | 2.02   | 2.77   | 4.80   |
| 0.73   | 1.77   | 1.38   | 1.82   | 5.28   | 0.79   | 2.88   | 1.90   | 2.29   | 4.77   | 1.39   | 1.63   | 2.23   | 2.01   | 1.38   | 1.39   | 0.68   | 2.69   | 0.38   | 2.14   | 1.54   | 3.52   | 3.49   | 2.41   | 1.97   | 0.37   | 2.74   | 4.27   |
| -0.95  | -1.54  | 1.28   | 1.14   | 4.43   | -0.24  | -0.36  | 2.31   | 0.88   | 0.64   | -2.01  | 0.29   | -0.03  | -0.10  | 0.39   | -0.60  | -1.95  | -1.83  | 1.50   | -2.24  | -0.74  | -2.28  | 1.69   | 0.18   | -1.37  | -3.63  | 1.73   | 0.63   |
| -0.92  | 0.55   | -0.19  | 0.03   | 2.55   | 0.64   | 0.20   | 2.21   | 1.02   | 1.57   | 0.01   | 0.55   | 1.33   | -0.74  | -0.82  | 1.47   | 1.13   | -0.34  | -1.55  | -2.03  | -0.11  | -0.43  | 0.96   | -0.29  | 1.28   | -1.66  | -1.91  | 2.03   |
| 0.51   | -0.01  | 2.56   | 2.83   | 5.38   | 2.46   | 2.66   | 3.66   | 4.01   | 2.51   | 3.57   | 2.15   | 1.71   | 2.11   | 2.62   | 2.14   | 1.81   | 1.46   | 3.28   | 2.67   | 2.28   | 11.52  | 5.21   | 4.45   | 5.97   | 2.75   | 2.47   | 4.20   |
| 11.14  | 10.66  | -1.19  | -0.05  | 3.31   | 0.66   | 1.36   | 1.56   | 0.90   | 2.34   | -0.80  | 0.91   | -0.39  | -1.11  | 0.74   | -0.64  | -1.28  | 0.76   | -0.20  | 3.86   | 3.14   | -1.93  | 0.14   | -0.99  | -4.33  | 0.74   | -3.37  | 0.74   |
| -2.76  | -2.48  | 1.40   | 1.66   | 3.94   | 3.02   | 2.12   | 3.13   | 2.19   | 2.99   | 1.70   | 1.05   | 2.97   | 1.51   | 1.77   | 2.14   | 1.45   | 1.14   | 1.99   | 3.56   | 2.65   | 6.49   | 7.23   | 3.04   | 5.99   | 2.33   | 3.93   | 3.09   |
| -1.40  | -1.54  | 1.20   | 1.43   | 5.28   | -0.02  | 2.44   | 2.62   | 1.07   | 0.49   | 0.09   | -0.63  | -2.20  | -0.63  | -0.10  | 0.72   | -0.23  | 1.01   | 0.99   | 0.94   | -1.07  | 1.24   | 3.51   | 1.38   | 1.69   | 0.86   | -0.26  | 1.72   |
| 0.56   | 1.93   | 11.15  | 8.69   | 13.27  | 11.99  | 7.29   | 12.29  | 12.54  | 9.42   | 11.75  | 10.49  | 11.67  | 10.81  | 9.23   | 11.32  | 10.72  | -0.40  | 11.34  | -3.70  | -6.50  | -13.35 | -6.81  | 8.53   | -2.04  | 0.65   | 11.20  | 0.10   |
| 0.51   | 1.74   | 11.90  | 9.04   | 12.27  | 12.32  | 7.16   | 11.17  | 13.44  | 11.16  | 14.55  | 9.84   | 11.92  | 13.97  | 6.44   | 13.66  | 14.12  | 2.15   | 11.62  | -3.53  | -5.70  | -14.16 | -9.99  | 7.51   | -2.57  | 3.64   | 11.79  | -0.01  |
| -1.28  | 0.65   | -30.73 | -25.35 | -29.72 | -32.07 | -36.72 | -29.83 | -31.62 | -31.65 | -30.12 | -25.03 | -31.80 | -31.56 | -38.72 | -33.31 | -29.70 | -9.35  | -30.40 | -23.56 | -23.77 | -27.99 | -24.27 | -31.28 | -30.92 | -19.04 | -29.38 | -25.18 |
| -2.94  | -3.61  | -15.37 | -12.65 | -9.98  | -14.46 | -14.81 | -11.70 | -11.83 | -11.47 | -13.34 | -12.70 | -9.96  | -16.03 | -13.94 | -17.40 | -13.54 | -1.01  | -9.05  | -4.77  | -3.63  | -0.02  | -1.85  | -8.53  | -2.12  | -3.68  | -10.51 | -1.14  |
| -3.19  | -1.30  | -24.11 | -23.60 | -24.32 | -23.73 | -22.81 | -21.79 | -19.99 | -21.50 | -20.26 | -21.04 | -19.17 | -27.26 | -20.01 | -29.08 | -22.51 | -0.09  | -13.95 | -7.99  | -4.60  | 1.81   | -4.36  | -10.78 | -5.22  | -2.96  | -16.03 | -5.28  |
| 0.14   | 0.51   | -1.74  | -0.44  | -1.32  | -3.85  | -6.50  | -5.59  | -1.07  | -0.14  | 0.03   | 1.85   | -0.23  | -3.97  | -3.07  | -3.36  | -0.41  | 1.92   | 0.17   | 3.13   | 0.35   | 0.67   | -1.47  | -0.56  | -1.41  | -0.29  | 1.16   | -0.37  |
| -12.90 | -13.66 | -17.55 | -18.48 | -15.64 | -20.19 | -19.71 | -21.32 | -23.05 | -23.02 | -15.41 | -18.59 | -22.59 | -21.44 | -21.68 | -24.40 | -21.59 | -15.48 | -17.20 | -18.37 | -15.99 | -19.68 | -19.67 | -18.42 | -21.52 | -13.81 | -16.72 | -20.32 |
| 0.32   | 0.52   | 2.55   | 2.34   | 4.28   | 0.92   | 2.23   | 2.62   | 2.34   | 3.05   | 0.82   | 2.15   | 2.24   | 2.42   | 1.14   | 2.87   | 1.12   | 1.96   | 2.82   | 1.71   | 2.66   | 0.72   | 2.69   | 4.23   | 2.53   | 1.39   | 3.53   | 2.31   |
| 0.18   | 2.13   | 4.23   | 2.30   | 7.17   | 4.61   | 3.46   | 5.56   | 5.76   | 6.60   | 2.37   | 4.43   | 3.41   | 4.19   | 2.75   | 5.17   | 4.91   | -1.07  | 2.31   | 3.59   | 0.74   | 0.50   | 3.29   | 4.59   | 4.18   | 0.99   | 4.67   | 3.56   |
| -1.16  | -1.59  | -0.31  | 0.59   | 2.23   | 1.22   | 0.78   | 1.68   | -1.01  | 1.08   | -0.49  | -0.92  | 0.67   | -0.55  | 0.76   | 0.72   | 0.20   | -0.72  | 1.13   | 0.58   | -0.32  | 1.02   | 1.75   | 0.41   | 1.30   | -1.53  | 0.60   | 1.49   |
| -1.26  | -2.78  | 0.15   | -1.02  | 1.35   | 0.04   | -0.14  | -0.08  | 0.14   | 0.55   | -1.08  | -0.98  | -1.01  | -0.75  | -0.53  | 0.52   | -0.17  | -1.43  | -0.43  | 0.20   | -0.59  | 0.51   | 0.62   | 0.12   | -0.69  | -1.33  | 0.73   | 1.00   |
| -0.89  | 0.87   | 1.80   | 2.29   | 0.88   | 2.43   | 1.91   | 3.79   | 3.13   | 2.84   | 0.55   | -0.43  | 1.44   | 3.23   | 1.70   | 1.29   | -0.10  | 1.95   | 0.04   | 4.23   | 2.47   | 1.99   | 4.31   | 1.90   | 1.64   | 2.71   | 2.28   | -0.01  |
| -3.22  | -5.46  | -6.70  | -9.37  | -2.73  | -8.74  | -7.06  | -4.14  | -10.26 | -7.22  | -6.79  | -11.86 | -10.47 | -6.45  | -1.56  | -1.68  | -11.01 | -3.94  | -0.20  | -6.70  | -3.77  | -4.89  | -6.41  | -3.92  | 1.77   | -6.10  | -8.81  | -8.27  |
| -3.54  | -6.11  | -12.65 | -17.36 | -9.34  | -13.22 | -10.54 | -9.34  | -16.16 | -12.05 | -13.25 | -15.36 | -13.18 | -8.03  | 1.00   | -3.01  | -15.91 | -5.61  | -3.00  | -7.36  | -1.04  | -1.14  | -2.41  | -4.81  | 3.42   | -8.64  | -5.23  | -6.54  |
| -2.14  | -9.03  | -19.17 | -26.53 | -15.96 | -18.57 | -16.43 | -15.79 | -24.21 | -15.47 | -21.08 | -27.99 | -23.36 | -14.16 | 1.28   | 6.01   | -27.51 | -7.09  | -2.82  | -11.02 | 1.84   | 2.40   | -1.55  | -5.03  | 5.61   | -10.83 | -9.81  | -9.35  |
| -3.33  | -1.86  | 1.95   | 2.60   | 3.50   | 1.59   | -1.66  | 0.06   | 2.17   | 1.12   | 2.25   | 1.42   | 2.37   | 0.97   | -1.06  | 1.19   | 1.68   | -1.84  | 6.97   | -3.65  | -5.33  | -14.22 | -9.10  | -0.62  | -4.60  | -0.68  | 7.34   | -3.15  |
| -2.61  | -2.16  | 2.57   | 2.63   | 4.05   | 1.59   | -2.36  | -0.32  | 3.66   | 1.05   | 4.00   | 2.60   | 1.81   | 0.75   | -3.11  | 0.37   | 0.49   | -3.48  | 6.99   | -7.23  | -8.56  | -19.23 | -13.29 | -2.53  | -8.50  | -2.33  | 8.95   | -6.28  |
| 8.37   | 11.68  | -7.77  | -8.38  | -5.28  | -7.31  | -9.05  | -7.62  | -9.49  | -7.20  | 9.09   | -5.52  | -6.96  | -8.60  | -10.57 | -8.43  | -6.36  | -8.26  | -20.33 | -10.84 | -12.44 | -16.78 | -9.94  | -17.76 | -21.44 | -12.94 | -19.69 | -10.06 |
| -0.80  | -2.37  | 4.50   | 4.11   | 7.72   | 5.54   | 5.98   | 7.08   | 4.12   | 5.60   | 1.79   | 6.33   | 4.19   | 3.65   | 0.60   | 5.45   | 2.03   | -0.80  | 7.19   | 3.11   | 3.58   | 1.50   | 1.81   | 6.19   | 0.88   | 2.13   | 7.22   | 1.94   |
| 0.94   | -2.50  | 52.82  | 51.37  | 52.80  | 49.21  | 51.66  | 50.46  | 54.16  | 51.01  | 49.76  | 47.24  | 52.25  | 50.23  | 53.59  | 55.21  | 50.15  | 10.67  | 46.67  | 15.64  | 13.44  | 3.67   | 12.04  | 44.22  | 20.56  | 14.94  | 53.08  | 14.40  |
| 5.44   | 2.07   | 3.48   | -0.85  | -1.29  | 2.54   | 3.17   | 4.00   | 0.35   | 2.39   | 1.39   | -0.94  | 1.90   | 1.65   | -1.87  | -0.10  | -0.29  | 2.39   | -1.12  | -0.05  | 2.99   | -2.36  | 2.07   | -0.17  | 1.00   | 3.06   | 1.47   | -1.63  |
| 1.99   | 1.93   | -4.67  | -4.35  | -2.84  | -4.32  | -2.89  | -4.48  | -2.48  | -1.30  | -2.24  | -3.86  | -1.83  | -2.27  | -3.39  | -4.83  | -1.68  | 0.63   | -0.98  | 1.21   | 1.41   | 4.90   | 1.51   | -1.47  | 1.49   | 0.06   | -2.99  | 0.23   |
| 3.02   | 2.47   | -6.26  | -3.74  | -3.06  | -4.30  | -4.18  | -5.19  | -2.90  | -3.25  | -5.63  | -3.70  | -3.99  | -5.84  | -5.14  | -5.05  | -4.37  | -0.48  | -3.60  | -1.54  | 1.93   | 4.07   | 3.73   | -2.30  | 0.34   | -0.65  | -4.66  | 0.45   |

|        |        |        |        |        |        |        |        |        |        |        |        |        |        |        |        |        |        |        |        |        |        |        |        |        |        |        |        |
|--------|--------|--------|--------|--------|--------|--------|--------|--------|--------|--------|--------|--------|--------|--------|--------|--------|--------|--------|--------|--------|--------|--------|--------|--------|--------|--------|--------|
| -7.59  | -17.25 | 6.57   | 8.32   | 9.36   | 7.44   | 7.76   | 7.99   | 8.83   | 6.01   | 8.17   | 6.38   | 6.92   | 4.99   | 5.02   | 5.95   | 4.88   | 12.89  | 29.45  | 16.74  | 8.72   | -1.07  | 17.77  | 22.85  | 25.72  | 16.52  | 34.20  | 14.07  |
| -9.77  | -24.87 | 14.11  | 12.38  | 16.17  | 13.66  | 13.30  | 10.54  | 15.90  | 9.57   | 11.96  | 9.79   | 12.13  | 9.52   | 8.55   | 10.66  | 11.16  | 16.84  | 42.54  | 28.05  | 10.93  | -9.62  | 27.10  | 37.93  | 29.92  | 23.15  | 47.68  | 18.15  |
| 3.66   | 12.90  | -2.07  | -3.43  | -0.58  | -2.80  | -3.89  | -3.13  | -3.71  | -1.96  | -4.64  | -1.49  | -6.00  | -3.99  | -6.97  | -3.30  | -3.00  | -10.00 | -18.06 | -18.79 | -18.01 | -22.96 | -14.28 | -19.98 | -28.37 | -12.87 | -16.00 | -17.52 |
| 1.86   | 1.45   | 3.77   | 3.25   | 5.86   | 2.63   | 2.82   | 4.32   | 4.69   | 4.72   | 4.08   | 3.30   | 4.51   | 2.72   | -1.2   | 3.47   | 1.96   | 0.91   | 8.99   | 4.11   | -8.42  | -10.83 | -4.52  | 3.79   | -9.73  | 1.86   | 9.57   | 1.54   |
| 1.73   | 2.61   | 7.28   | 6.62   | 10.23  | 5.26   | 5.27   | 9.09   | 10.04  | 9.41   | 8.21   | 7.57   | 9.30   | 8.90   | 1.02   | 8.72   | 7.13   | 2.58   | 16.05  | 7.28   | -8.74  | -14.38 | -2.29  | 9.62   | -8.62  | 6.15   | 17.16  | 3.75   |
| 0.56   | 0.03   | -19.26 | -16.84 | -15.83 | -19.60 | -19.79 | -15.44 | -17.23 | -19.00 | -17.77 | -16.17 | -19.77 | -21.12 | -25.66 | -10.77 | -19.70 | -10.99 | -28.73 | -29.88 | -24.17 | -18.41 | -25.02 | -36.54 | -44.25 | -21.74 | -31.98 | -22.97 |
| -2.13  | -1.59  | 0.59   | 1.39   | 7.08   | 0.88   | 1.76   | 1.16   | 0.88   | 3.29   | 1.23   | 1.05   | -0.58  | 0.84   | 1.36   | 2.14   | -0.28  | 0.16   | 2.10   | -2.44  | 1.66   | 1.94   | 4.64   | 0.60   | 3.44   | 0.48   | 1.49   | 0.88   |
| 1.19   | 0.90   | 0.20   | 0.42   | 3.35   | 0.36   | -0.23  | 1.11   | 0.78   | 0.59   | -1.07  | -0.09  | 0.72   | -0.16  | -0.19  | -0.16  | -0.22  | -0.47  | 0.42   | -0.03  | -0.17  | 0.26   | 2.12   | 1.24   | 0.26   | 0.04   | 1.09   | 1.43   |
| -4.32  | -2.22  | 2.02   | 1.82   | 6.06   | 1.64   | 3.17   | 1.54   | -0.06  | 1.29   | 0.66   | 0.59   | 1.40   | 0.68   | 2.15   | 2.41   | 1.10   | 1.21   | 4.62   | 3.06   | 1.76   | 2.85   | 3.80   | 2.12   | 0.91   | 0.72   | 2.24   | 2.41   |
| -1.83  | 0.74   | 2.62   | 2.45   | 6.69   | 1.99   | 1.39   | 4.08   | 2.31   | 2.72   | -1.12  | 1.90   | -0.26  | -2.06  | -12.34 | 2.28   | 3.50   | 0.02   | 2.94   | 2.35   | 1.42   | 1.43   | 5.41   | 2.13   | 1.67   | -0.58  | 1.54   | 1.61   |
| 0.38   | 0.51   | 3.19   | 2.53   | 8.77   | 3.09   | 3.87   | 2.55   | 2.33   | 3.75   | 1.32   | 1.05   | 2.39   | 2.33   | -0.86  | 1.95   | 0.15   | -0.31  | 0.95   | 0.05   | -0.79  | 1.05   | 0.78   | -1.02  | 2.19   | -0.94  | 1.46   | -0.53  |
| -0.62  | -1.03  | 5.90   | 3.41   | 8.47   | 6.35   | 5.45   | 4.07   | 6.19   | 5.41   | 2.16   | 1.88   | 3.58   | 3.04   | 20.75  | 3.86   | 2.28   | -0.47  | 1.14   | 0.65   | -0.20  | 1.89   | 1.99   | 0.33   | 4.28   | -1.28  | 1.19   | 1.39   |
| 2.08   | 0.52   | 2.54   | 2.31   | 1.23   | 2.07   | 3.99   | 2.74   | 0.43   | 1.48   | 2.35   | 2.21   | 1.73   | 2.46   | 2.27   | 1.61   | 1.63   | 2.63   | 1.68   | 2.42   | 1.89   | 3.45   | 3.79   | 2.26   | 3.31   | 1.08   | 2.19   | 2.73   |
| 1.77   | 2.88   | 2.07   | 2.25   | 4.16   | 1.79   | 2.12   | 2.24   | 3.60   | 2.20   | 1.74   | 2.05   | 3.22   | 1.77   | 2.16   | 2.18   | 1.82   | 1.52   | 2.12   | 1.48   | 2.34   | 3.04   | 2.62   | 0.72   | 1.99   | 1.11   | 2.21   | 4.76   |
| 0.46   | 1.27   | 1.97   | 2.30   | 5.05   | 1.27   | 2.56   | 1.68   | 1.93   | 4.21   | 0.82   | 1.92   | 3.03   | 2.97   | 2.09   | 1.89   | 1.46   | 2.32   | 1.90   | 2.65   | 0.83   | 2.27   | 2.49   | 2.02   | 1.34   | 0.31   | 2.36   | 5.51   |
| -2.21  | -1.68  | 1.43   | 1.15   | 4.88   | 0.68   | -0.50  | 3.41   | 1.43   | 1.12   | -0.14  | 1.08   | -0.39  | -1.49  | -0.92  | -0.77  | -1.71  | -1.28  | 0.39   | -2.39  | -2.09  | -3.00  | 1.07   | 0.16   | -1.63  | -3.41  | 0.73   | 0.13   |
| -0.78  | 0.59   | 0.53   | -0.14  | 3.04   | 1.17   | 0.94   | 1.84   | 1.25   | 1.93   | -0.14  | 0.14   | 1.56   | 0.79   | 0.82   | 1.10   | 1.29   | -1.82  | -0.37  | -2.67  | -0.63  | -0.32  | 1.21   | -0.68  | -0.24  | -3.42  | -0.93  | 1.70   |
| 0.10   | 0.06   | 1.21   | 2.48   | 5.93   | 3.36   | 3.42   | 3.87   | 3.26   | 2.22   | 2.39   | 2.63   | 2.23   | 1.45   | 2.59   | 2.63   | 2.39   | 1.79   | 4.39   | 3.23   | 1.71   | 11.40  | 4.40   | 3.86   | 7.12   | 2.82   | 3.54   | 4.84   |
| 11.16  | 9.77   | -0.31  | 1.51   | 5.00   | 2.44   | 2.09   | 3.26   | 3.00   | 4.31   | -0.74  | 2.34   | 1.32   | -0.97  | 2.28   | 0.65   | 0.73   | 0.29   | -3.15  | -0.39  | -0.96  | 2.60   | 1.36   | -3.67  | -1.76  | -2.85  | -3.30  | 0.11   |
| -2.83  | -1.89  | 1.68   | 1.52   | 4.25   | 2.63   | 2.54   | 2.77   | 1.94   | 2.85   | 1.38   | 1.44   | 2.55   | 1.59   | 1.80   | 2.33   | 0.88   | 2.37   | 2.33   | 3.51   | 1.50   | 7.44   | 7.68   | 3.68   | 6.74   | 2.07   | 4.30   | 2.61   |
| -1.86  | -2.60  | 1.19   | 0.69   | 3.38   | -0.28  | 0.88   | 0.36   | 1.36   | 0.58   | -0.82  | -1.74  | -1.19  | -1.15  | 0.33   | 1.49   | 0.33   | 2.25   | 0.15   | 0.28   | -1.28  | 1.58   | 3.04   | 0.34   | 2.28   | 1.42   | -0.24  | 1.43   |
| 0.41   | 1.02   | 9.18   | 7.53   | 12.45  | 9.56   | 5.96   | 10.76  | 8.58   | 8.05   | 9.65   | 7.86   | 9.51   | 9.14   | 7.80   | 9.75   | 10.26  | 17.19  | 18.99  | 0.73   | -3.45  | -11.95 | -3.91  | 16.39  | 4.44   | 4.27   | 20.37  | 4.77   |
| 0.14   | 2.40   | 10.64  | 7.94   | 10.34  | 10.76  | 5.61   | 9.11   | 10.54  | 9.51   | 13.37  | 9.33   | 10.45  | 12.02  | 5.03   | 11.42  | 11.89  | 3.25   | 21.06  | -0.39  | -3.75  | -14.46 | -3.77  | 15.60  | 2.41   | 7.25   | 22.61  | 3.31   |
| -2.07  | -1.42  | -25.87 | -22.30 | -26.36 | -28.59 | -32.95 | -26.53 | -27.56 | -26.90 | -23.70 | -30.15 | -27.63 | -34.37 | -30.93 | -26.77 | -15.84 | -42.33 | -41.07 | -35.45 | -34.61 | -37.00 | -45.49 | -48.80 | -27.62 | -44.81 | -36.13 |        |
| -3.35  | -2.48  | -14.28 | -10.90 | -8.75  | -12.61 | -13.22 | -10.69 | -10.48 | -9.70  | -12.08 | -11.40 | -9.71  | -15.06 | -11.35 | -15.31 | -13.17 | -2.60  | -14.56 | -9.64  | -7.14  | -1.68  | -5.86  | -13.92 | -6.71  | -5.80  | -17.50 | -7.97  |
| -2.23  | -3.43  | -22.27 | -21.99 | -20.94 | -22.04 | -21.55 | -20.18 | -18.38 | -20.22 | -19.08 | -19.97 | -18.34 | -25.70 | -18.68 | -27.62 | -20.29 | -2.51  | -22.79 | -15.95 | -10.58 | -2.22  | -9.92  | -21.64 | -16.46 | -8.33  | -26.37 | -11.87 |
| 0.12   | 0.65   | -1.41  | 0.90   | -0.90  | -2.19  | -6.27  | 0.08   | -0.31  | 0.23   | 0.01   | 1.76   | -2.13  | -4.36  | -2.84  | -4.44  | 1.04   | 1.84   | -2.24  | 1.50   | -3.32  | 1.44   | -4.51  | -2.27  | -3.62  | -1.19  | 1.76   | 2.96   |
| -14.23 | -15.88 | -18.19 | -19.19 | -17.68 | -22.28 | -26.91 | -24.71 | -24.61 | -24.25 | -17.95 | -20.26 | -24.59 | -24.34 | -23.49 | -26.89 | -23.57 | -15.76 | -18.19 | -20.26 | -18.20 | -20.56 | -21.25 | -18.45 | -24.47 | -16.39 | -19.26 | -22.07 |
| 0.61   | 0.81   | 2.46   | 2.51   | 4.74   | 1.78   | 2.08   | 3.20   | 2.33   | 3.09   | 1.35   | 2.10   | 3.09   | 2.04   | 1.18   | 2.85   | 1.23   | 1.32   | 3.23   | 2.56   | 2.92   | 1.07   | 2.99   | 4.70   | 3.48   | 1.63   | 2.85   | 2.08   |
| 1.82   | 3.01   | 4.66   | 2.79   | 8.60   | 5.57   | 5.45   | 4.66   | 6.06   | 6.58   | 3.32   | 4.01   | 2.84   | 2.57   | 4.74   | 4.95   | 4.26   | 1.11   | 2.52   | 3.53   | -0.29  | -0.58  | 2.00   | 5.11   | 3.59   | 2.81   | 5.21   | 2.96   |
| -0.60  | -1.92  | -0.19  | 0.60   | 2.58   | 1.47   | 1.46   | 1.14   | -0.53  | -0.67  | -0.67  | -0.82  | 0.40   | 0.76   | 0.37   | -0.22  | -0.90  | 0.50   | 1.38   | 0.09   | -0.21  | 0.80   | 1.42   | -0.27  | 2.30   | -1.30  | 0.34   | 1.41   |
| -1.83  | -2.74  | -0.15  | -1.06  | 0.57   | -0.41  | -0.01  | -0.40  | 0.66   | 1.31   | -0.86  | -0.84  | -0.43  | -0.52  | -0.17  | 0.76   | -0.62  | -1.23  | -0.40  | 0.31   | -1.03  | 0.71   | 1.12   | 0.37   | -0.26  | -1.27  | 0.61   | 1.29   |
| -0.91  | 1.44   | 2.59   | 2.55   | 2.95   | 2.32   | 1.79   | 3.49   | 3.23   | 2.11   | 0.77   | 1.19   | 2.58   | 2.77   | 4.36   | 1.89   | 2.34   | 2.16   | 1.23   | 4.11   | 2.21   | 1.85   | 2.51   | 2.43   | 2.62   | 2.75   | 1.19   | 2.32   |
| -3.31  | -4.72  | -7.01  | -11.30 | -3.94  | -10.33 | -8.81  | -4.21  | -5.63  | -5.09  | -6.72  | -12.30 | -10.99 | -7.88  | 1.02   | -2.73  | -11.58 | -4.40  | -1.35  | -6.67  | -3.43  | -4.96  | -3.33  | -3.24  | -7.06  | -6.59  | -1.87  | -9.90  |
| -3.74  | -5.83  | -13.82 | -18.98 | -10.57 | -14.24 | -12.19 | -9.37  | -11.93 | -7.30  | -13.98 | -17.33 | -14.37 | -8.66  | 2.73   | -4.02  | -17.69 | -5.79  | -4.10  | -7.76  | -0.77  | -0.38  | -0.06  | -4.43  | -6.87  | -8.86  | -5.69  | -6.24  |
| -2.55  | -8.14  | -20.78 | -27.86 | -16.79 | -20.64 | -18.63 | -15.93 | -18.85 | -7.93  | -22.37 | -28.46 | -23.93 | -13.76 | 3.60   | -7.41  | -28.09 | -7.05  | -4.00  | -11.80 | 2.04   | 3.50   | 1.10   | -5.48  | -11.24 | -10.20 | -8.86  |        |
| -3.21  | -1.31  | 1.64   | 1.40   | 2.63   | 0.91   | -2.45  | -0.50  | 2.13   | 0.34   | 0.81   | 0.33   | 1.02   | -0.23  | -2.84  | -0.03  | 2.45   | -0.81  | 9.02   | -2.82  | -5.17  | -13.00 | -7.72  | 1.36   | -3.98  | 1.60   | 12.07  | -1.71  |
| -2.77  | -2.75  | 1.83   | 2.54   | 2.88   | 0.30   | -2.90  | -1.63  | 2.19   | 0.46   | 1.66   | 2.23   | 0.34   | -0.26  | -3.63  | -0.02  | -0.88  | -2.63  | 9.36   | -6.13  | -8.35  | -19.44 | -12.80 | 0.06   | -7.67  | -1.11  | 12.70  | -5.52  |
| 8.97   | 12.29  | -4.52  | -5.03  | -2.63  | -3.45  | -5.63  | -3.61  | -5.64  | -4.17  | -5.04  | -3.36  | -5.19  | -4.88  | -7.67  | -5.72  | -4.06  | -12.20 | -27.77 | -15.37 | -15.26 | -19.40 | -14.59 | -23.49 | -28.36 | -18.84 | -27.23 | -14.41 |
| -2.19  | -1.61  | 5.40   | 3.71   | 8.51   | 5.70   | 6.28   | 5.11   | 3.74   | 5.45   | 2.50   | 6.45   | 3.37   | 3.28   | -0.13  | 6.37   | 1.63   | 0.23   | 7.80   | 4.03   | 3.19   | 2.15   | 3.71   | 6.62   | 2.20   | 1.46   | 8.03   | 1.79   |
| 0.25   | -4.52  | 49.41  | 48.23  | 50.48  | 44.82  | 48.29  | 47.77  | 49.86  | 44.66  | 44.57  | 43.52  | 50.93  | 46.71  | 50.47  | 51.84  | 48.02  | 18.71  | 61.14  | 35.00  | 32.32  | 14.77  | 26.49  | 64.97  | 46.52  | 29.31  | 72.37  | 30.50  |
| 6.09   | 2.39   | 2.77   | -0.94  | -1.62  | 2.32   | 1.89   | 0.67   | 0.34   | 2.11   | 2.35   | -0.21  | 2.91   | 1.82   | -1.24  | -0.40  | -0.16  | 2.72   | -1.87  | -1.76  | 3.31   | 2.64   | 1.80   | -1.43  | 1.73   | 4.32   | -0.73  | -2.64  |
| 1.79   | 2.01   | 3.72   | -4.27  | -3.37  | -3.17  | -2.53  | -3.67  | -1.90  | -0.50  | -2.03  | -3.71  | -0.85  | -1.47  | -2.22  | -3.99  | -1.63  | -0.39  | -3.50  | -0.69  | -0.77  | 3.54   | -0.97  | -2.84  | -6.63  | -1.67  | -5.51  | -0.90  |
| 3.13   | 3.56   | -4.93  | -3.16  | -2.36  | -3.10  | -2.84  | -3.47  | -1.79  | -2.32  | -3.88  | -2.54  | -3.44  | -4.97  | -4.53  | -3.76  | -3.77  | -1.43  | -6.19  | -3.34  | -0.07  | 1.91   | 0.16   | -4.96  | -3.07  | -2.47  | -7.59  | -1.57  |
| 0.37   | 0.31   | -1.50  | -0.32  | 1.09   | -1.22  | -1.90  | -2.28  | -0.23  | -0.59  | -3.09  | -1.20  | -1.79  | -1.88  | -0.99  | -2.36  | -1.20  | -1.10  | -2.82  | -1.48  | 2.98   | 1.55   | 0.45   | -1.81  | 1.34   | 0.76   | -1.40  | -0.28  |
| -9.16  | -7.94  | 1.83   | 3.03   | 6.71   | 2.94   | 2.35   | 4.70   | 3.67   | 4.23   | 2.60   | 1.30   | 2.01   | 2.78   | 1.01   | 4.65   | 2.47   | 1.65   | 5.11   | 5.25   | 7.59   | 8.61   | 9.07   | 6.80   | 7.76   | 3.86   | 5.40   | 10.53  |
| -17.55 | -14.28 | 4.53   | 4.79   | 6.90   | 6.43   | 10.57  | 9.16   | 10.48  | 11.51  | 7.61   | 4.41   | 7.86   | 8.39   | 9.16   | 8.99   | 6.19   | 8.44   | 9.90   | 8.94   | 18.55  | 18.88  | 17.27  | 15.59  | 17.96  | 13.87  | 8.11   | 22.03  |

|        |        |        |        |        |        |        |        |        |        |        |        |        |        |        |        |        |        |        |        |        |        |        |        |        |        |        |        |
|--------|--------|--------|--------|--------|--------|--------|--------|--------|--------|--------|--------|--------|--------|--------|--------|--------|--------|--------|--------|--------|--------|--------|--------|--------|--------|--------|--------|
| 2.35   | 1.50   | 3.02   | 2.37   | 5.36   | 2.76   | 1.47   | 3.79   | 4.39   | 4.41   | 3.50   | 3.63   | 4.99   | 2.46   | -2.11  | 3.82   | 3.45   | 1.87   | 10.78  | 7.96   | -7.08  | -9.86  | -0.86  | 6.56   | -5.27  | 4.65   | 12.23  | 4.50   |
| 1.43   | 2.88   | 6.60   | 6.01   | 8.31   | 5.13   | 4.51   | 8.55   | 8.90   | 8.99   | 7.22   | 6.86   | 8.90   | 8.05   | 0.55   | 7.87   | 6.10   | 5.26   | 19.17  | 12.41  | -5.89  | -12.85 | 1.93   | 11.89  | -4.08  | 11.28  | 21.26  | 8.78   |
| 0.04   | -0.58  | -17.46 | -15.66 | -14.99 | -16.82 | -18.50 | -13.22 | -14.46 | -17.59 | -15.83 | -16.70 | -18.10 | -18.40 | -22.04 | -17.40 | -17.38 | -19.37 | -33.83 | -41.07 | -38.51 | -27.52 | -39.94 | -44.20 | -57.39 | -32.38 | -39.11 | -35.62 |
| -2.01  | -1.43  | 0.75   | 1.24   | 6.49   | 1.40   | 1.28   | 1.65   | 1.33   | 2.88   | -0.45  | 1.09   | -2.12  | 0.56   | 1.54   | 3.00   | 0.02   | -0.14  | 1.56   | 1.32   | 2.39   | 2.78   | 4.42   | 1.28   | 2.86   | 0.27   | 2.17   | 0.93   |
| 0.68   | 0.94   | 0.47   | 0.62   | 3.53   | 0.23   | 0.10   | 0.85   | 0.66   | 0.62   | -0.82  | -0.10  | 0.38   | 0.11   | 0.12   | -0.57  | 0.16   | -0.54  | 0.32   | 0.51   | -0.77  | 0.48   | 1.90   | 0.45   | 2.00   | 0.38   | 0.74   | 2.07   |
| -5.64  | -2.75  | 1.91   | 1.45   | 6.14   | 2.99   | 1.72   | 2.01   | 1.06   | 1.30   | 0.35   | 0.70   | 0.46   | 0.15   | 3.17   | 1.77   | 1.32   | 0.73   | 3.55   | 3.36   | 1.83   | 4.05   | 4.81   | 2.85   | 1.75   | 0.64   | 1.72   | 1.70   |
| -1.21  | 0.22   | 2.41   | 2.80   | 7.61   | 2.47   | 1.26   | 4.70   | 2.29   | 2.90   | -0.17  | 1.66   | -1.00  | -2.24  | -12.54 | 2.12   | 2.75   | -0.20  | 2.27   | 2.32   | 1.87   | 2.90   | 5.28   | 2.12   | 2.29   | -0.19  | 2.75   | 2.43   |
| 0.19   | 0.30   | 3.28   | 2.59   | 7.52   | 3.14   | 3.96   | 2.50   | 2.71   | 4.03   | 1.18   | 1.17   | 2.50   | 2.80   | -0.73  | 2.02   | 1.20   | -1.08  | 0.27   | 0.40   | -0.08  | -0.23  | 1.89   | 0.36   | 2.82   | -0.56  | 1.07   | 0.42   |
| 1.07   | -0.97  | 5.32   | 4.07   | 9.18   | 6.14   | 4.92   | 4.43   | 5.32   | 4.21   | 3.15   | 2.58   | 3.71   | 2.68   | 20.34  | 3.46   | 1.82   | -1.30  | 0.27   | 0.03   | 0.84   | 1.33   | 1.89   | 0.53   | 4.90   | -0.99  | 2.77   | 1.76   |
| 3.02   | 0.89   | 2.48   | 3.12   | 2.30   | 1.84   | 3.44   | 2.93   | 0.88   | 2.50   | 2.38   | 2.28   | 2.52   | 2.17   | 2.58   | 2.03   | 2.18   | 1.43   | -0.17  | 1.57   | 1.86   | 4.46   | 3.06   | 2.06   | 2.30   | 0.49   | 1.39   | 3.28   |
| 2.01   | 2.91   | 2.17   | 2.54   | 4.24   | 2.63   | 3.30   | 2.39   | 3.88   | 2.36   | 2.46   | 2.77   | 3.96   | 2.70   | 2.86   | 2.54   | 2.72   | 1.70   | 0.19   | 1.44   | 3.25   | 2.82   | 1.74   | 1.12   | 1.79   | 1.42   | 1.16   | 4.32   |
| 1.15   | 0.96   | 1.92   | 2.47   | 6.10   | 1.16   | 2.16   | 2.85   | 3.25   | 3.47   | 1.94   | 2.46   | 3.14   | 2.42   | 2.42   | 2.72   | 0.48   | 2.32   | 1.45   | 2.72   | 1.86   | 3.05   | 2.88   | 2.21   | 1.59   | -0.06  | 1.68   | 4.40   |
| -3.19  | -1.54  | 1.01   | 1.53   | 4.61   | 0.77   | -0.40  | 2.24   | 1.36   | -0.10  | -0.27  | 0.89   | -0.08  | -0.05  | -0.73  | -0.32  | -1.80  | -1.82  | -0.25  | -3.16  | -2.44  | -2.94  | 1.15   | -0.24  | -0.87  | -4.52  | -0.64  | 0.12   |
| -0.63  | 0.34   | 0.68   | 0.52   | 2.78   | 1.70   | 2.17   | 2.99   | 1.87   | 2.80   | 0.60   | 1.26   | 2.39   | -0.15  | 1.51   | 2.72   | 1.90   | -2.66  | -4.26  | -3.25  | -1.36  | 0.56   | 0.08   | -2.26  | -2.33  | -4.62  | -3.86  | 0.99   |
| -0.29  | -1.52  | 1.97   | 2.02   | 5.31   | 2.73   | 1.50   | 2.81   | 4.28   | 2.12   | 1.34   | 3.68   | 2.84   | 1.69   | 3.06   | 1.61   | 1.40   | 1.59   | 3.86   | 4.31   | 2.46   | 1.73   | 6.49   | 5.71   | 6.55   | 4.02   | 3.03   | 5.96   |
| 11.70  | 10.28  | 2.01   | 2.33   | 5.57   | 3.24   | 2.71   | 4.95   | 2.79   | 5.36   | 1.84   | 4.07   | 2.91   | 0.24   | 2.62   | 2.50   | 2.50   | -0.65  | -3.60  | -1.09  | -2.72  | 2.28   | 1.87   | -4.74  | -2.31  | -4.15  | -4.90  | -1.34  |
| -3.05  | -2.02  | 1.16   | 1.75   | 4.41   | 2.48   | 2.21   | 2.91   | 2.23   | 2.19   | 1.41   | 1.03   | 2.73   | 1.92   | 2.35   | 2.63   | 1.12   | 1.65   | 2.25   | 3.97   | 2.61   | 8.73   | 8.15   | -4.77  | 8.25   | 2.85   | 4.61   | 3.70   |
| -2.77  | -3.47  | 0.86   | 0.15   | 4.22   | -0.12  | 2.25   | 1.91   | -0.16  | 0.49   | -0.71  | -1.29  | -0.53  | -0.51  | -1.17  | 0.86   | 0.54   | 0.92   | 1.16   | 1.16   | -1.18  | 2.28   | 3.30   | 0.45   | 2.37   | 0.54   | -0.23  | 0.18   |
| 0.81   | 1.17   | 6.97   | 7.49   | 11.17  | 8.50   | 4.77   | 8.77   | 8.93   | 7.22   | 7.90   | 7.42   | 10.39  | 8.02   | 5.23   | 8.73   | 8.37   | 5.99   | 25.78  | 12.41  | 3.27   | -8.18  | 6.23   | 24.84  | 17.57  | 11.94  | 28.38  | 13.56  |
| 0.51   | 2.08   | 8.41   | 7.14   | 8.63   | 9.39   | 4.83   | 7.63   | 9.52   | 7.61   | 10.92  | 8.44   | 10.42  | 10.43  | 4.63   | 9.08   | 10.40  | 7.15   | 25.96  | 7.50   | -0.26  | -12.75 | -2.23  | 21.67  | 9.34   | 15.98  | 31.38  | 10.46  |
| -0.82  | 1.17   | -24.32 | -21.17 | -22.87 | -25.91 | -28.37 | -22.95 | -23.53 | -24.24 | -25.29 | -20.20 | -24.95 | -25.14 | -30.28 | -27.39 | -23.18 | -26.57 | -48.47 | -58.53 | -56.24 | -48.36 | -57.60 | -51.87 | -65.26 | -42.95 | -53.93 | -50.43 |
| -2.23  | -1.76  | -13.25 | -10.56 | -8.20  | -10.50 | -11.41 | -8.86  | -9.72  | -8.23  | -9.97  | -9.62  | -8.91  | -13.44 | -10.64 | -13.60 | -11.82 | -6.77  | -16.07 | -16.67 | -13.22 | -5.14  | -11.37 | -10.63 | -13.70 | -13.46 | -20.61 | -13.08 |
| -1.63  | -2.77  | -20.65 | -19.77 | -19.79 | -20.94 | -19.88 | -18.46 | -15.85 | -18.61 | -16.90 | -19.08 | -16.46 | -21.81 | -16.80 | -25.93 | -19.93 | -8.68  | -25.45 | -25.19 | -19.19 | -8.12  | -22.06 | -25.12 | -31.73 | -17.78 | -31.57 | -22.81 |
| -0.22  | 2.00   | -1.06  | 1.34   | -0.29  | -1.12  | -4.96  | -1.12  | -0.81  | 0.87   | 0.65   | 3.82   | -0.68  | -2.37  | -0.75  | -4.50  | 1.86   | 0.06   | -3.68  | -2.40  | -3.95  | -1.17  | -6.03  | -3.61  | -5.38  | -1.51  | -0.10  | -4.41  |
| -15.43 | -17.52 | -20.87 | -19.52 | -18.70 | -22.67 | -22.86 | -25.65 | -27.06 | -26.72 | -18.53 | -21.89 | -26.42 | -24.82 | -24.95 | -28.15 | -25.17 | -17.50 | -19.35 | -22.20 | -18.34 | -22.46 | -23.39 | -21.41 | -25.86 | -17.63 | -19.93 | -23.99 |
| 0.44   | 1.35   | 2.60   | 2.94   | 4.97   | 2.64   | 2.17   | 2.60   | 2.33   | 3.79   | 1.20   | 2.89   | 3.38   | 1.76   | 1.41   | 3.43   | 1.99   | 1.05   | 2.72   | 2.41   | 2.90   | 1.14   | 3.21   | 4.26   | 3.13   | 2.57   | 0.83   | 3.89   |
| 2.16   | 2.35   | 5.26   | 4.10   | 9.23   | 7.28   | 5.74   | 7.06   | 6.73   | 6.57   | 1.98   | 4.43   | 3.80   | 3.50   | 3.83   | 5.82   | 5.07   | 0.62   | 4.01   | 4.44   | 2.08   | 1.22   | 2.61   | 5.00   | 4.93   | 3.53   | 3.73   | 2.61   |
| -2.03  | -2.62  | -0.98  | 0.51   | 3.06   | 0.63   | 1.10   | 1.97   | -1.46  | 0.42   | -1.98  | -0.42  | 1.25   | 0.59   | 1.91   | -0.08  | -0.13  | -0.20  | 0.81   | 0.70   | -1.39  | 1.46   | 1.52   | 4.09   | 2.17   | -1.40  | 0.73   | 2.13   |
| -1.85  | -2.11  | -0.02  | -1.07  | -0.02  | -0.34  | 0.22   | -0.37  | 0.06   | 0.45   | -0.46  | -0.33  | -0.57  | -0.38  | 0.48   | 0.44   | -0.08  | -1.20  | 0.21   | 1.19   | -0.57  | 1.33   | 1.22   | 0.73   | 0.74   | -1.15  | 1.02   | 1.73   |
| -1.58  | -0.33  | 2.41   | 2.60   | 4.19   | 2.42   | 1.86   | 3.99   | 2.82   | 2.97   | 1.55   | 1.19   | 2.11   | 2.55   | 2.00   | 2.17   | 0.76   | 1.98   | 0.28   | 2.77   | 2.14   | 2.42   | 4.25   | 1.39   | 2.55   | 2.54   | 1.60   | 1.68   |
| -4.21  | -4.19  | -9.24  | -12.15 | -5.43  | -10.54 | -7.45  | -5.26  | -6.14  | -7.71  | -8.71  | -13.20 | -10.65 | -7.30  | -7.12  | -3.20  | -12.74 | -6.32  | -1.59  | -8.08  | -3.35  | -5.79  | -9.30  | -3.99  | -2.39  | -6.36  | -2.85  | -8.61  |
| -3.46  | -5.51  | -14.80 | -19.99 | -12.65 | -14.86 | -11.97 | -9.59  | -11.81 | -13.65 | -15.45 | -19.03 | -15.28 | -9.20  | -5.54  | -4.27  | -17.78 | -6.62  | -4.46  | -9.55  | -1.99  | -3.79  | -6.26  | -5.26  | -1.14  | -10.04 | -6.46  | -6.41  |
| -3.84  | -7.25  | -24.26 | -29.86 | -18.04 | -21.46 | -18.48 | -16.72 | -18.48 | -16.76 | -25.46 | -30.16 | -24.58 | -15.09 | -4.83  | -7.13  | -28.44 | -8.24  | -6.01  | -13.50 | 1.46   | 2.19   | -5.57  | -7.75  | -0.24  | -11.68 | -12.06 | -10.64 |
| -2.59  | -1.81  | 1.27   | 1.17   | 1.88   | 0.72   | -1.94  | -0.41  | 1.75   | 0.62   | 0.21   | 0.37   | 0.96   | -0.53  | -3.12  | -0.25  | 1.01   | 1.31   | 1.14   | -1.08  | -4.41  | -14.25 | -7.05  | 3.43   | -2.79  | 2.81   | 13.77  | -1.82  |
| -3.01  | -2.27  | 0.34   | 1.74   | 3.65   | 0.01   | -3.56  | -1.94  | 1.54   | -0.05  | 1.07   | 0.72   | 1.62   | -0.28  | -4.10  | -0.44  | -0.86  | -1.46  | 11.36  | -4.05  | -7.43  | -18.81 | -11.12 | 1.23   | -6.74  | 1.56   | 16.05  | -4.32  |
| 8.62   | 11.34  | -1.01  | -2.38  | -1.28  | -1.08  | -2.90  | 0.16   | -2.73  | -1.66  | -3.83  | -0.08  | -1.29  | -2.04  | -4.87  | -3.18  | -1.90  | -16.70 | -32.71 | -21.21 | -22.00 | -25.58 | -20.65 | -27.34 | -33.77 | -25.86 | -34.90 | -21.59 |
| -3.36  | -3.23  | 4.26   | 4.74   | 8.36   | 4.96   | 5.90   | 6.11   | 3.38   | 5.77   | 2.40   | 6.22   | 4.08   | 5.16   | 0.42   | 5.83   | 1.66   | 1.20   | 8.37   | 4.78   | 5.03   | 2.54   | 3.42   | 7.37   | 2.95   | 2.74   | 8.08   | 3.54   |
| -0.94  | -5.92  | 44.11  | 44.46  | 45.45  | 42.75  | 44.01  | 43.50  | 46.48  | 40.32  | 42.52  | 40.62  | 45.25  | 43.28  | 47.50  | 47.97  | 45.01  | 33.59  | 64.80  | 59.99  | 49.44  | 35.68  | 52.37  | 69.80  | 57.95  | 52.03  | 77.72  | 51.44  |
| 4.18   | 2.29   | 1.86   | -1.01  | -0.58  | 2.69   | 3.53   | 4.48   | 1.48   | 1.98   | 3.49   | -1.23  | 3.03   | 2.68   | -1.13  | 0.32   | 0.74   | 0.66   | -1.90  | -1.92  | -2.20  | -3.09  | 2.41   | -1.26  | 2.35   | 4.80   | -0.71  | -3.52  |
| 2.55   | 1.94   | -2.64  | -2.93  | -2.10  | -1.71  | -1.23  | -3.02  | -0.87  | 0.31   | -2.12  | -2.21  | -0.13  | -0.88  | -0.92  | -2.95  | -0.33  | -2.23  | -6.63  | -3.23  | -2.55  | 3.39   | -5.25  | -4.22  | -4.08  | -3.70  | -8.38  | -5.20  |
| 2.93   | 3.41   | -4.17  | -3.14  | -2.28  | -2.92  | -1.20  | -2.62  | -0.54  | -1.67  | -2.72  | -2.03  | -0.01  | -3.76  | -3.34  | -3.00  | -3.09  | -3.36  | -8.12  | -5.41  | -3.05  | 0.15   | -3.09  | -7.48  | -6.16  | -5.89  | -9.92  | -3.82  |
| 0.43   | 1.59   | 1.41   | 0.61   | 0.77   | -0.25  | -1.68  | -0.48  | 0.88   | -0.64  | -1.47  | -0.89  | -0.71  | -2.19  | -0.06  | -0.48  | -1.00  | -1.54  | -5.08  | -2.03  | 0.39   | 0.68   | -1.22  | -2.77  | -0.03  | -1.78  | 1.10   | -1.00  |
| -9.67  | -7.25  | 1.99   | 3.25   | 5.80   | 2.87   | 1.64   | 5.04   | 2.97   | 4.12   | 2.23   | 0.99   | 2.77   | 1.97   | 0.16   | 5.03   | 1.66   | 2.91   | 5.72   | 5.57   | 7.79   | 11.17  | 9.82   | 8.33   | 7.90   | 5.04   | 7.54   | 10.58  |
| -19.74 | -16.34 | 3.59   | 4.29   | 7.00   | 5.52   | 8.74   | 7.10   | 9.64   | 10.64  | 6.66   | 3.55   | 7.12   | 7.47   | 7.79   | 8.61   | 5.76   | 8.95   | 8.42   | 8.83   | 19.43  | 21.47  | 18.74  | 15.43  | 18.18  | 15.12  | 7.55   | 24.30  |
| 4.93   | 6.87   | 0.25   | -0.57  | 2.07   | -1.68  | -1.98  | 0.04   | -0.30  | -1.83  | -1.85  | 0.74   | -1.69  | -2.39  | -6.01  | -2.58  | 0.13   | -3.47  | -3.59  | -1.63  | -15.21 | -14.60 | -13.10 | -5.66  | -13.69 | -7.93  | -0.66  | -13.73 |
| -0.11  | -1.75  | 2.31   | 0.96   | 1.84   | 1.47   | 2.30   | 1.27   | 1.77   | 1.31   | -1.07  | 1.32   | 1.19   | 0.09   | 1.04   | 1.32   | 0.66   | -0.25  | 3.70   | 0.83   | 2.04   | 4.03   | 2.95   | 1.19   | 1.37   | -1.63  | 2.59   | 1.56   |
| -0.47  | -0.32  | 2.83   | -1.11  | 1.75   | 0.46   | 1.61   | 2.19   | 0.97   | 1.34   | -0.06  | -0.64  | -0.21  | 0.92   | 1.82   | 0.74   | -0.10  | -0.17  | 5.82   | 0.37   | 0.20   | 5.99   | 1.18   | 0.50   | -0.54  | -0.14  | 4.2    | 1.25   |
| -0.60  | -2.65  |        |        |        |        |        |        |        |        |        |        |        |        |        |        |        |        |        |        |        |        |        |        |        |        |        |        |



|        |        |        |        |        |        |        |        |        |        |        |        |        |        |        |        |        |        |        |        |        |        |        |        |        |        |        |        |       |
|--------|--------|--------|--------|--------|--------|--------|--------|--------|--------|--------|--------|--------|--------|--------|--------|--------|--------|--------|--------|--------|--------|--------|--------|--------|--------|--------|--------|-------|
| -2.55  | -1.04  | 1.29   | 2.00   | 5.46   | 0.23   | 1.47   | 0.83   | 1.08   | 3.11   | 0.84   | 1.00   | 2.36   | 0.32   | 0.76   | 2.45   | 1.32   | 0.68   | 1.89   | 2.81   | 1.52   | 1.97   | 5.43   | 1.52   | 4.63   | 1.54   | 1.23   | 1.69   |       |
| 0.68   | 0.79   | 1.04   | 0.44   | 3.92   | 0.80   | 0.14   | 1.88   | 1.53   | 0.88   | -0.69  | 0.66   | -0.29  | 0.64   | 0.13   | -1.19  | 0.11   | -0.51  | 0.67   | -0.38  | -0.14  | 0.52   | 2.01   | 0.96   | 0.77   | 1.58   | 1.44   | 1.68   |       |
| -6.26  | -3.76  | 1.83   | 0.97   | 5.76   | 1.54   | 2.48   | 0.85   | 0.23   | 1.08   | 0.14   | 1.06   | 0.74   | 1.12   | 2.23   | 3.47   | 0.48   | 1.73   | 3.44   | 3.11   | 1.92   | 3.79   | 2.55   | 2.88   | 1.95   | 1.19   | 1.98   | 3.75   |       |
| -1.97  | 1.21   | 2.62   | 3.19   | 7.25   | 1.59   | 1.70   | 4.45   | 2.11   | 3.57   | -0.99  | 1.91   | -0.99  | -2.13  | -11.57 | 2.41   | 2.85   | -0.41  | 3.29   | 1.14   | 1.46   | 1.31   | 5.35   | 2.70   | 3.74   | 0.44   | 3.50   | 1.25   |       |
| 0.04   | 0.12   | 3.72   | 2.56   | 7.76   | 3.47   | 2.97   | 2.85   | 2.86   | 3.42   | 1.84   | 1.34   | 2.59   | 2.70   | -1.23  | 1.74   | 1.02   | 0.09   | 0.77   | 0.89   | 0.05   | 0.43   | 2.12   | -0.34  | 0.90   | -0.25  | 1.99   | -0.15  |       |
| -1.52  | -0.82  | 5.81   | 4.01   | 9.02   | 6.11   | 5.38   | 4.52   | 5.32   | 2.92   | 2.94   | 2.52   | 4.22   | 4.18   | 20.75  | 2.61   | 1.22   | -0.86  | 1.11   | 0.97   | 0.03   | 0.87   | 2.93   | 2.21   | 3.98   | 0.12   | 3.09   | 2.21   |       |
| 2.39   | 1.97   | 3.14   | 2.94   | 2.60   | 2.38   | 3.54   | 3.09   | 1.14   | 2.76   | 2.93   | 2.75   | 2.10   | 2.97   | 2.92   | 2.40   | 1.98   | 1.27   | 0.65   | 1.10   | 1.03   | 2.81   | 2.04   | 1.72   | 0.70   | 0.51   | 1.01   | 2.40   |       |
| 2.22   | 2.60   | 2.43   | 2.87   | 3.90   | 2.81   | 3.51   | 2.81   | 4.26   | 2.41   | 2.44   | 2.76   | 4.14   | 2.77   | 3.35   | 2.21   | 2.74   | 1.01   | 1.72   | -0.01  | 2.00   | 2.12   | 1.96   | 0.11   | 1.82   | 1.46   | 1.67   | 4.08   |       |
| 0.62   | 1.23   | 2.64   | 2.90   | 6.53   | 2.63   | 2.45   | 2.23   | 2.41   | 3.52   | 2.76   | 3.31   | 4.91   | 3.19   | 3.57   | 2.56   | 1.34   | 2.05   | 0.88   | 1.15   | 1.48   | 3.17   | 2.39   | 1.39   | 0.75   | 0.23   | 1.95   | 3.71   |       |
| -3.17  | -1.34  | -0.01  | 1.45   | 3.55   | -0.03  | -1.27  | 2.16   | 1.42   | -0.64  | -0.30  | 1.43   | 0.45   | -1.48  | -0.84  | -0.81  | -2.00  | -1.62  | -1.10  | -2.94  | -2.63  | -3.51  | -0.56  | 0.88   | -1.02  | -4.75  | -0.45  | 1.20   |       |
| -0.57  | -0.01  | 1.39   | 1.10   | 3.68   | 1.91   | 1.30   | 2.71   | 2.02   | 2.36   | 1.50   | 1.70   | 2.79   | 0.73   | 1.27   | 1.86   | 1.28   | -3.37  | -4.83  | -4.95  | -2.47  | 0.34   | -1.17  | -1.92  | -1.55  | -5.37  | -5.15  | -0.01  |       |
| 0.37   | 0.17   | 2.42   | 1.67   | 5.61   | 2.51   | 2.37   | 4.50   | 2.12   | 1.81   | 1.99   | 2.14   | 1.59   | 2.64   | 3.22   | 1.01   | 2.27   | 2.66   | 5.80   | 4.58   | 2.87   | 15.82  | 5.28   | 4.99   | 6.90   | 3.71   | 3.29   | 5.87   |       |
| 11.51  | 10.27  | 3.13   | 2.77   | 6.88   | 5.29   | 4.10   | 4.79   | 5.17   | 6.09   | 2.92   | 5.85   | 4.75   | 2.72   | 2.80   | 2.31   | 2.39   | -2.91  | -4.19  | -2.88  | -2.77  | 0.57   | 0.02   | -4.90  | -2.92  | -4.04  | -5.84  | -3.01  |       |
| -3.21  | -2.50  | 1.24   | 1.72   | 3.86   | 2.14   | 2.54   | 2.70   | 1.58   | 2.40   | 1.50   | 0.15   | 2.83   | 1.61   | 2.43   | 2.63   | 0.91   | 3.92   | 2.50   | 4.98   | 3.19   | 8.93   | 7.95   | 4.33   | 7.74   | 3.28   | 4.59   | 4.22   |       |
| -2.48  | -2.75  | 1.86   | -0.21  | 3.72   | 1.02   | 1.10   | 0.54   | 0.57   | 0.42   | -1.13  | -1.00  | 0.99   | -0.92  | -0.31  | 1.72   | 0.99   | 1.32   | 2.47   | 1.33   | -1.44  | 1.79   | 3.33   | 0.43   | 2.29   | 0.59   | 1.67   | 2.04   |       |
| -0.50  | 0.30   | 5.99   | 6.53   | 9.85   | 6.48   | 3.26   | 7.57   | 6.43   | 5.24   | 6.75   | 7.43   | 8.41   | 6.54   | 3.83   | 6.58   | 6.63   | 15.48  | 27.52  | 21.52  | 13.63  | 2.63   | 15.61  | 28.66  | 25.06  | 23.47  | 32.43  | 24.83  |       |
| 0.14   | 1.35   | 2.73   | 5.68   | 7.65   | 7.62   | 3.22   | 6.47   | 8.86   | 6.75   | 9.14   | 7.08   | 9.44   | 9.21   | 2.72   | 8.99   | 9.22   | 16.60  | 29.23  | 13.57  | 6.12   | -7.99  | 4.24   | 23.31  | 13.86  | 27.73  | 33.53  | 19.49  |       |
| -0.25  | 1.40   | -20.36 | -16.46 | -20.69 | -21.39 | -25.36 | -19.67 | -20.34 | -20.61 | -20.33 | -19.35 | -22.33 | -21.55 | -27.21 | -24.46 | -21.56 | -40.70 | -50.55 | -67.06 | -64.56 | -67.00 | -74.13 | -53.04 | -69.39 | -53.67 | -55.60 | -61.54 |       |
| -2.41  | -1.36  | -11.75 | -9.41  | -7.15  | -9.74  | -11.94 | -8.25  | -8.27  | -7.75  | -7.99  | -10.03 | -7.91  | -11.55 | -9.44  | -13.98 | -11.23 | -12.46 | -16.65 | -19.34 | -16.86 | -11.75 | -18.33 | -17.17 | -18.12 | -17.50 | -19.48 | -19.74 |       |
| -0.82  | -2.06  | -18.61 | -18.34 | -18.34 | -18.56 | -17.48 | -16.61 | -15.14 | -16.14 | -16.48 | -16.32 | -14.26 | -21.14 | -15.50 | -23.72 | -17.53 | -16.67 | -25.75 | -31.73 | -24.69 | -16.77 | -37.07 | -26.92 | -37.46 | -27.54 | -32.40 | -33.77 |       |
| 0.51   | 1.85   | -0.61  | 1.05   | -0.03  | -0.54  | -3.92  | 1.88   | 0.61   | 0.74   | 1.10   | 3.58   | -0.47  | -2.00  | -0.79  | -4.14  | 1.46   | -1.34  | -2.88  | -4.15  | -4.24  | -2.35  | -7.26  | -3.10  | -6.01  | -2.94  | -1.21  | -6.45  |       |
| -16.54 | -17.85 | -22.56 | -21.66 | -20.00 | -24.76 | -24.40 | -27.25 | -28.47 | -28.13 | -18.44 | -22.99 | -27.79 | -26.49 | -47.42 | -29.56 | -26.46 | -18.83 | -21.00 | -23.70 | -21.48 | -23.86 | -26.12 | -21.75 | -28.10 | -18.14 | -22.62 | -26.03 |       |
| 0.92   | 1.40   | 3.24   | 2.78   | 4.43   | 2.68   | 2.40   | 3.73   | 3.01   | 3.48   | 1.26   | 2.67   | 3.48   | 2.06   | 1.52   | 2.83   | 1.92   | 1.72   | 3.73   | 2.01   | 3.53   | 1.33   | 3.68   | 4.69   | 3.04   | 2.32   | 1.54   | 3.08   |       |
| 1.23   | 1.81   | 5.59   | 3.23   | 9.87   | 7.54   | 6.78   | 7.15   | 7.63   | 8.03   | 5.17   | 4.55   | 4.65   | 4.95   | 4.48   | 6.50   | 5.59   | 0.53   | 5.01   | 5.11   | 1.53   | 1.82   | 2.40   | 5.60   | 6.93   | 2.32   | 4.15   | 4.30   |       |
| -2.34  | -0.48  | -0.97  | 0.88   | 2.01   | -0.57  | 0.13   | 0.99   | -1.40  | 0.08   | -0.94  | -0.96  | -0.09  | -0.14  | 0.95   | 0.08   | -1.57  | 0.30   | 1.79   | 1.81   | 0.40   | 1.30   | 1.38   | 0.65   | 2.32   | -0.84  | 1.69   | 2.54   |       |
| -1.32  | -2.84  | -0.14  | -1.41  | 0.54   | 0.19   | 0.48   | -0.29  | 0.12   | 0.82   | -0.89  | -0.88  | -0.11  | -0.44  | -0.05  | -0.45  | 0.48   | -0.68  | -0.04  | 0.13   | -0.46  | 1.34   | 1.84   | 0.93   | 0.52   | -0.52  | 0.39   | 1.60   |       |
| -1.20  | 0.40   | 2.97   | 3.30   | 2.78   | 2.15   | 1.25   | 3.26   | 1.78   | 2.20   | 1.62   | 0.85   | 2.17   | 3.29   | 1.84   | 1.17   | 1.40   | 1.69   | 0.66   | 4.06   | 2.48   | 2.98   | 3.52   | 1.74   | 2.30   | 3.30   | 2.41   | 1.81   |       |
| -4.51  | -4.45  | -7.74  | -12.18 | -5.84  | -10.70 | -9.17  | -5.43  | -6.92  | -8.82  | -7.74  | -13.33 | -10.81 | -7.70  | -5.17  | -5.60  | -12.88 | -4.00  | -1.81  | -4.75  | -3.94  | 13.37  | -8.22  | -4.06  | -2.71  | -8.62  | -3.73  | -7.80  |       |
| -3.69  | -5.54  | -15.72 | -21.04 | -13.23 | -15.24 | -14.48 | -10.40 | -10.40 | -12.56 | -12.62 | -16.24 | -19.61 | -16.08 | -10.12 | -3.63  | -8.34  | -19.35 | -5.10  | -6.36  | -4.13  | -1.29  | 12.25  | -5.92  | -4.47  | -1.37  | -11.07 | -7.03  | -6.94 |
| -3.66  | -8.30  | -24.00 | -31.77 | -20.34 | -20.47 | -18.75 | -17.66 | -20.90 | -18.76 | -25.98 | -30.60 | -26.14 | -10.72 | -2.44  | -12.82 | -30.38 | -8.12  | -7.99  | -4.73  | 7.71   | 8.09   | -5.36  | -6.00  | -5.50  | -14.06 | -14.95 | -10.95 |       |
| -2.64  | -1.71  | 1.41   | -0.05  | 1.99   | -0.13  | -3.53  | -1.43  | 1.71   | -0.23  | 0.27   | 0.30   | 0.46   | 0.00   | -3.37  | -1.02  | 0.12   | 1.92   | 12.85  | -0.13  | -3.78  | -7.99  | -4.93  | 3.90   | -3.28  | 5.37   | 15.68  | 0.43   |       |
| -2.66  | -2.92  | 0.26   | 1.25   | 2.18   | 0.03   | -3.47  | -2.34  | 1.41   | -0.39  | 1.51   | 0.59   | 0.59   | -0.82  | -4.34  | -1.26  | -1.30  | 1.17   | 14.00  | -2.45  | -6.46  | -12.82 | -10.72 | 1.38   | -6.39  | 3.88   | 17.47  | -2.19  |       |
| 8.88   | 12.41  | 0.29   | 0.26   | -3.00  | 0.49   | -1.79  | 0.49   | -0.02  | -0.08  | -1.23  | 1.59   | 0.06   | 0.26   | -2.54  | 0.06   | 0.25   | -21.99 | -34.72 | -26.24 | -27.77 | -34.83 | -24.58 | -29.11 | -36.42 | -32.27 | -36.54 | -27.58 |       |
| -3.71  | -2.40  | 4.91   | 4.60   | 7.40   | 5.11   | 4.94   | 6.12   | 5.10   | 6.32   | 2.95   | 6.25   | 3.41   | 5.07   | 6.61   | 6.15   | 0.63   | 3.21   | 8.07   | 5.66   | 4.32   | 2.17   | 3.95   | 7.79   | 2.72   | 4.00   | 8.56   | 2.70   |       |
| -1.77  | -8.03  | 41.87  | 40.55  | 45.30  | 37.94  | 41.23  | 37.34  | 41.88  | 37.34  | 39.52  | 37.88  | 42.93  | 39.15  | 42.84  | 43.64  | 41.57  | 50.84  | 66.87  | 64.37  | 54.93  | 58.18  | 67.48  | 70.52  | 61.54  | 59.10  | 78.43  | 63.30  |       |
| 5.04   | 2.23   | 2.71   | -0.35  | -0.26  | 3.59   | 2.53   | 0.19   | 1.08   | 1.56   | 1.75   | -0.17  | 1.73   | 2.80   | -0.60  | 0.62   | 1.61   | 1.83   | -3.07  | -3.30  | 4.30   | -0.62  | 0.26   | -0.19  | -0.13  | 3.79   | -0.77  | -3.78  |       |
| 2.81   | 3.01   | -2.47  | -2.23  | -1.72  | -1.48  | -0.33  | -1.79  | 0.54   | 0.74   | -0.68  | -2.83  | 0.12   | -0.31  | 1.41   | -2.76  | -0.28  | -4.25  | -3.67  | -5.56  | -4.99  | -0.79  | -8.37  | -5.81  | -5.32  | 6.34   | -8.51  | -7.79  |       |
| 3.22   | 3.59   | -3.45  | -2.48  | -0.90  | -1.46  | -1.61  | -2.32  | 0.12   | -0.22  | -1.79  | -1.17  | -2.17  | -2.85  | -3.07  | -1.87  | -1.64  | -5.46  | -8.77  | -8.75  | -5.17  | -2.92  | -7.26  | -8.15  | -8.89  | -8.80  | -11.46 | -7.86  |       |
| 0.41   | 1.20   | -1.13  | -0.53  | 1.27   | -0.24  | -0.68  | 0.03   | 0.08   | -0.29  | -1.98  | -1.24  | -0.92  | -1.33  | -0.51  | -1.24  | 0.61   | -2.79  | -4.78  | -3.36  | -0.38  | -0.40  | -2.36  | -3.48  | -1.66  | -3.33  | -4.49  | -2.13  |       |
| -11.04 | -8.12  | 1.78   | 2.38   | 4.97   | 2.14   | 1.14   | 2.92   | 3.21   | 2.65   | 1.14   | 1.15   | 1.84   | 1.31   | -1.46  | 3.60   | 0.63   | 3.32   | 6.52   | 4.23   | 8.30   | 11.32  | 9.79   | 8.16   | 8.30   | 5.58   | 6.51   | 10.66  |       |
| -21.10 | -18.24 | 2.94   | 3.43   | 6.12   | 4.36   | 6.98   | 5.82   | 8.04   | 8.47   | 6.42   | 2.65   | 6.05   | 5.78   | 6.19   | 6.79   | 4.28   | 10.08  | 8.83   | 8.63   | 19.59  | 23.31  | 19.01  | 15.59  | 17.67  | 15.40  | 7.51   | 23.36  |       |
| 5.27   | 8.35   | 0.49   | -0.11  | 1.88   | 0.52   | -2.48  | 0.90   | 0.02   | -1.21  | -0.11  | -0.30  | 0.20   | -1.45  | -5.41  | -2.53  | -0.29  | -4.82  | -2.75  | -1.83  | -14.89 | -16.64 | -13.56 | -5.19  | -14.24 | -6.49  | -5.50  | -13.05 |       |
| -0.39  | -1.23  | 2.83   | 0.68   | 1.12   | 0.87   | 1.72   | 2.59   | 2.14   | 0.25   | -1.35  | 1.52   | 0.21   | -0.06  | 0.88   | 0.01   | -0.36  | -0.05  | 3.89   | 3.11   | 16.89  | 3.72   | 2.77   | 9.00   | 0.55   | -1.28  | 1.57   | 1.20   |       |
| -0.65  | -0.18  | 2.60   | -0.65  | 2.06   | 0.83   | 1.06   | 0.80   | 0.90   | 1.30   | 0.33   | -0.32  | 0.01   | 1.44   | 1.44   | -0.21  | -0.43  | 0.21   | 5.09   | -0.48  | -0.08  | 5.53   | 1.12   | 0.53   | 0.29   | 0.49   | 0.11   | 1.30   |       |
| 0.48   | -1.40  | 1.21   | -3.13  | -2.39  | -2.37  | -2.71  | 0.60   | -3.22  | -0.70  | -2.05  | -4.53  | -0.40  | -1.86  | -2.08  | -1.78  | -3.23  | -0.76  | 4.48   | -4.32  | -1.78  | 5.44   | -1.86  | -2.65  | -4.11  | -2.58  | -0.79  | -2.25  |       |
| -4.37  | -7.20  | 0.96   | 0.69   | 3.45   | 0.12   | -0.76  | 0.83   | 1.30   | -0.19  | 0.25   | 0.38   | 1.58   | -0.84  | -2.95  | 1.94   | 0.23   | 13.63  | 33.33  | 15.88  | 2.85   | 0.91   | 14.10  | 13.81  | 0.54   | 17.50  | 35.19  | 13.33  |       |
| -6.50  | -7.88  | 1.21   | 0.97   | 3.11   | 0.43   | -2.63  | 1.01   | 0.85   | -0.23  | 1.59   | 0.43   | 1.17   | -0.69  | -4.79  | 0.65   | -1.78  | 13.63  | 29.25  | 11.84  | 2.48   | -1.50  | -0.34  | 16.02  | 1.97   | 17.40  | 30.30  | 13.12  |       |
| 5.14   | 5.69   |        |        |        |        |        |        |        |        |        |        |        |        |        |        |        |        |        |        |        |        |        |        |        |        |        |        |       |

|        |        |        |        |        |        |        |        |        |        |        |        |        |        |        |        |        |        |        |        |        |        |        |        |        |        |        |        |
|--------|--------|--------|--------|--------|--------|--------|--------|--------|--------|--------|--------|--------|--------|--------|--------|--------|--------|--------|--------|--------|--------|--------|--------|--------|--------|--------|--------|
| -1.27  | 0.05   | 2.48   | 3.20   | 7.18   | 2.02   | 1.66   | 3.49   | 2.55   | 3.89   | -0.52  | 0.71   | -1.06  | -2.39  | -11.88 | 2.82   | 3.14   | 0.79   | 2.29   | 2.24   | 1.35   | 0.91   | 5.71   | 2.24   | 2.45   | 1.07   | 1.98   | 0.94   |
| -0.21  | 0.14   | 3.56   | 2.50   | 7.98   | 3.06   | 3.75   | 2.87   | 2.59   | 3.55   | 1.53   | 1.71   | 3.25   | 2.77   | -1.08  | 2.10   | 0.84   | -0.54  | 1.12   | 1.62   | -0.43  | 0.75   | 2.02   | 1.00   | 2.23   | 0.04   | 1.21   | 0.78   |
| -0.68  | -1.56  | 4.41   | 4.31   | 9.11   | 6.69   | 5.52   | 4.01   | 5.03   | 4.76   | 3.60   | 2.42   | 2.17   | 3.83   | 20.89  | 2.74   | 1.20   | -0.55  | 3.07   | 2.05   | 0.34   | 1.94   | 2.72   | 2.49   | 6.15   | 0.73   | -0.19  | 3.23   |
| 3.18   | 1.66   | 3.38   | 3.00   | 2.61   | 2.73   | 3.39   | 3.68   | 0.72   | 3.21   | 3.70   | 2.61   | 2.24   | 3.26   | 3.83   | 2.85   | 2.36   | 0.96   | 1.16   | 1.03   | 1.09   | 1.92   | 3.09   | 1.35   | 1.54   | 0.72   | 0.56   | 2.12   |
| 1.66   | 2.77   | 2.81   | 3.10   | 4.36   | 2.71   | 3.85   | 2.99   | 4.71   | 2.62   | 2.97   | 3.92   | 4.17   | 2.93   | 3.43   | 2.81   | 3.10   | 1.34   | 1.96   | 0.17   | 1.67   | 1.87   | 0.86   | 0.55   | 0.54   | 1.11   | 2.17   | 3.19   |
| 1.13   | 1.51   | 2.35   | 2.66   | 6.68   | 1.50   | 2.39   | 2.32   | 3.00   | 4.11   | 3.08   | 3.31   | 3.65   | 3.32   | 2.79   | 3.43   | 0.77   | 1.30   | 0.57   | 0.97   | 1.25   | 2.59   | 2.04   | 0.47   | 1.52   | 1.08   | 2.14   | 3.08   |
| -2.41  | -1.91  | -0.38  | 1.63   | 3.92   | 0.16   | -0.55  | 1.87   | 2.03   | 1.06   | -2.11  | 1.05   | 0.60   | -1.45  | 0.28   | 0.24   | -2.42  | -1.60  | 0.82   | -2.65  | -2.21  | -4.59  | -1.42  | 0.67   | -1.11  | -4.70  | 0.95   | 0.06   |
| -0.14  | 0.25   | 2.24   | 1.20   | 4.02   | 2.23   | 2.03   | 2.66   | 2.26   | 2.31   | 1.53   | 2.51   | 2.08   | -0.02  | 1.86   | 2.45   | 2.10   | -5.55  | -5.80  | -5.54  | -1.83  | -1.87  | -3.58  | -2.70  | -2.01  | -6.08  | -5.59  | -1.83  |
| 0.33   | 0.12   | 1.51   | 2.63   | 5.72   | 2.52   | 2.54   | 3.47   | 3.32   | 2.71   | 2.48   | 2.38   | 2.59   | 2.88   | 2.84   | 1.94   | 2.28   | 3.58   | 5.01   | 4.96   | 3.30   | 12.08  | 4.34   | 4.77   | 6.68   | 3.63   | 3.26   | 6.59   |
| 11.93  | 11.05  | 4.37   | 2.86   | 8.08   | 5.66   | 4.51   | 6.69   | 5.71   | 7.06   | 3.43   | 5.47   | 4.06   | 2.74   | 5.02   | 3.95   | 3.64   | -4.15  | -5.68  | -3.74  | -2.38  | -0.60  | -1.73  | -4.94  | -2.71  | -6.13  | -5.57  | -4.52  |
| -2.94  | -2.20  | 0.86   | 1.45   | 3.77   | 2.06   | 1.96   | 2.27   | 1.89   | 2.34   | 0.93   | 0.92   | 2.67   | 1.64   | 1.84   | 2.15   | 0.63   | -4.15  | -2.67  | 4.48   | 3.81   | 8.18   | 8.34   | 4.34   | 7.88   | 4.32   | 5.07   | 5.26   |
| -0.95  | -2.31  | 0.16   | 0.39   | 3.66   | 0.19   | 1.00   | 1.08   | -0.09  | -0.91  | -0.09  | -0.50  | 0.18   | -0.26  | 1.96   | 1.70   | 0.19   | 1.13   | 2.10   | 1.23   | -1.15  | 0.64   | 2.94   | 0.43   | 1.92   | 2.46   | 1.34   | 1.27   |
| 0.50   | 0.64   | 5.21   | 6.32   | 7.99   | 6.41   | 2.50   | 6.11   | 5.79   | 4.37   | 6.07   | 5.49   | 8.35   | 6.42   | 3.73   | 6.10   | 6.37   | 24.33  | 29.30  | 22.73  | 18.75  | 16.70  | 21.95  | 29.66  | 26.40  | 29.97  | 31.86  | 30.04  |
| -0.12  | 1.00   | 6.06   | 4.83   | 6.59   | 5.96   | 2.35   | 5.54   | 7.45   | 5.58   | 9.41   | 6.95   | 8.06   | 7.79   | 2.14   | 7.12   | 8.37   | 25.53  | 29.76  | 14.17  | 9.59   | -3.18  | 7.44   | 25.25  | 14.36  | 33.08  | 34.48  | 22.56  |
| 0.38   | 1.87   | -14.48 | -15.31 | -18.92 | -19.45 | -22.25 | -16.77 | -16.77 | -17.98 | -16.83 | -15.60 | -20.17 | -18.35 | -22.65 | -21.98 | -18.22 | -50.48 | -50.39 | -72.61 | -68.92 | -76.49 | -78.22 | -55.13 | -72.41 | -58.68 | -55.17 | -67.84 |
| -2.58  | -1.46  | -9.88  | -9.31  | -6.07  | -8.97  | -10.63 | -7.03  | -6.88  | -7.91  | -8.98  | -9.60  | -7.06  | -10.12 | -8.22  | -12.85 | -10.03 | -16.08 | -16.06 | -21.24 | -17.37 | -14.42 | -21.84 | -17.06 | -21.19 | -19.62 | -20.55 | -19.93 |
| -0.23  | -0.87  | -17.49 | -17.52 | -17.48 | -16.05 | -15.79 | -14.57 | -13.64 | -14.87 | -14.37 | -15.43 | -13.51 | -19.34 | -14.08 | -21.78 | -16.45 | -21.28 | -25.76 | -31.92 | -27.43 | -23.97 | -41.14 | -26.66 | -38.54 | -30.51 | -32.25 | -34.16 |
| -0.25  | 0.97   | -0.57  | 2.05   | 0.40   | -1.56  | -3.61  | 2.33   | 0.64   | 1.70   | 0.46   | 3.24   | 0.74   | -1.39  | -0.24  | -3.42  | 2.10   | -1.94  | -2.85  | -4.42  | -6.31  | -5.29  | -7.85  | -3.67  | -8.34  | -5.67  | -0.80  | -5.43  |
| -18.55 | -19.12 | -23.39 | -22.67 | -21.41 | -26.32 | -26.60 | -29.82 | -29.04 | -30.68 | -20.65 | -23.73 | -29.08 | -28.51 | -28.85 | -30.96 | -27.65 | -20.11 | -23.08 | -25.67 | -22.85 | -26.46 | -27.27 | -24.37 | -31.13 | -19.57 | -23.94 | -27.98 |
| 1.22   | 1.09   | 2.75   | 3.10   | 5.00   | 2.47   | 3.00   | 3.45   | 2.84   | 3.99   | 1.40   | 2.60   | 2.93   | 2.78   | 2.48   | 3.26   | 1.92   | 1.85   | 3.81   | 2.87   | 3.44   | 1.46   | 3.50   | 4.09   | 3.92   | 2.77   | 1.90   | 2.85   |
| 2.35   | 3.13   | 6.83   | 3.73   | 10.13  | 7.66   | 6.74   | 7.21   | 7.73   | 8.01   | 5.32   | 5.21   | 4.36   | 4.67   | 6.21   | 6.83   | 5.39   | 1.73   | 3.99   | 4.70   | 2.62   | 1.07   | 5.79   | 6.50   | 7.38   | 4.56   | 4.19   | 5.36   |
| -1.99  | -1.62  | -0.81  | 0.40   | 2.05   | -0.78  | 0.37   | 0.66   | -1.25  | -1.16  | 0.63   | -0.40  | 0.01   | 0.36   | 1.79   | -0.39  | -1.52  | 0.40   | 1.59   | 0.92   | 0.21   | 1.59   | 1.43   | 0.88   | 2.09   | -0.66  | 0.46   | 1.17   |
| -1.52  | -2.64  | -0.08  | -1.64  | 0.11   | 0.05   | -0.13  | -0.40  | -0.14  | 1.13   | -1.32  | -0.67  | -0.43  | -0.81  | 0.34   | 0.33   | 0.31   | 0.06   | 0.50   | 1.17   | -0.46  | 1.39   | 1.48   | 0.23   | 0.38   | -0.04  | 0.86   | 2.34   |
| -0.58  | 1.40   | 2.20   | 2.91   | 3.25   | 3.86   | 0.13   | 3.65   | 2.53   | 2.77   | 0.91   | 1.65   | 2.25   | 3.03   | 1.06   | 1.47   | 0.54   | 1.75   | -0.52  | 3.35   | 2.76   | 1.97   | 1.03   | 1.63   | 2.15   | 3.09   | 1.71   | 1.11   |
| -4.76  | -4.59  | -8.68  | -14.18 | -7.50  | -10.54 | -9.90  | -5.80  | -7.88  | -8.74  | -8.85  | -15.30 | -12.18 | -8.06  | -4.07  | -5.30  | -13.51 | -3.40  | -2.70  | -6.13  | -4.67  | 14.88  | -10.48 | 3.17   | -2.51  | -9.01  | -4.45  | -8.57  |
| -3.26  | -5.90  | -17.07 | -23.06 | -13.48 | -15.01 | -14.05 | -10.97 | -13.95 | -13.28 | -15.94 | -20.81 | -17.30 | -10.95 | -2.63  | -7.41  | -19.68 | -6.12  | -7.39  | -8.03  | -1.95  | 13.84  | -7.62  | 0.14   | -2.00  | -11.59 | -9.22  | -6.91  |
| -4.40  | -7.74  | -25.81 | -32.77 | -21.73 | -21.51 | -20.16 | -17.71 | -20.93 | -17.78 | -25.28 | -33.72 | -26.37 | -16.43 | -1.76  | -12.54 | -29.91 | -8.57  | -10.41 | -13.34 | 0.16   | 9.61   | -8.06  | -2.46  | -2.31  | -15.72 | -15.98 | -12.92 |
| -3.01  | -2.08  | 1.24   | -0.53  | 1.26   | -0.48  | -3.52  | -1.69  | -0.83  | -0.37  | -1.63  | -1.48  | 0.21   | -1.23  | -3.25  | -0.61  | 0.63   | 4.14   | 13.95  | 0.39   | -3.30  | -6.35  | -4.98  | 3.81   | -2.90  | 5.93   | 16.90  | 1.97   |
| -2.55  | -2.71  | -0.05  | 0.45   | 2.31   | -0.18  | -4.13  | -2.35  | 2.08   | -0.30  | 1.89   | 0.21   | 0.09   | -0.81  | -4.55  | -1.21  | -1.47  | 2.00   | 14.36  | -2.87  | -6.74  | -13.21 | -10.27 | 1.96   | -6.21  | 5.12   | 18.43  | -0.85  |
| 9.10   | 12.53  | 2.35   | 1.80   | 0.94   | 3.04   | -0.87  | 2.88   | 1.39   | -0.15  | 1.65   | 3.82   | 2.11   | 1.30   | -0.79  | 1.37   | 1.20   | -27.36 | -35.37 | -28.28 | -30.18 | -41.27 | -28.05 | -30.35 | -37.41 | -36.02 | -38.74 | -32.83 |
| -4.26  | -3.53  | 4.41   | 4.47   | 9.07   | 4.73   | 6.33   | 4.70   | 2.96   | 5.29   | 2.14   | 6.02   | 4.03   | 4.40   | 0.66   | 5.39   | 1.84   | 2.48   | 7.93   | 5.57   | 3.80   | -4.33  | 4.40   | 6.00   | 3.34   | 3.46   | 7.80   | 4.17   |
| -3.48  | -9.95  | 38.75  | 37.13  | 41.08  | 33.63  | 36.13  | 34.89  | 38.62  | 33.88  | 34.18  | 35.11  | 39.35  | 36.19  | 39.32  | 34.34  | 39.00  | 57.27  | 66.28  | 64.38  | 56.53  | 59.75  | 67.94  | 70.67  | 61.10  | 61.54  | 79.16  | 65.04  |
| 4.88   | 1.39   | 2.88   | 0.98   | -6.09  | 2.39   | 2.36   | -0.20  | 1.10   | 2.17   | 2.62   | -1.04  | 2.10   | 2.94   | -1.39  | 0.82   | 1.47   | 1.46   | -1.98  | -2.71  | 4.23   | -4.01  | -0.69  | -1.72  | 1.39   | 4.25   | -8.00  | -4.83  |
| 2.67   | 2.65   | -1.70  | -2.53  | -0.70  | -1.08  | 0.13   | -2.45  | 0.71   | 1.01   | 1.18   | -0.63  | 0.91   | 0.47   | 0.68   | -1.10  | 0.54   | -6.35  | -7.85  | -5.94  | -5.67  | -4.12  | -10.79 | -5.72  | -6.84  | -7.69  | -8.62  | -10.22 |
| 3.90   | 3.44   | -2.91  | -1.20  | -1.01  | -0.91  | -0.93  | -1.41  | 0.67   | 0.13   | -1.63  | -1.10  | -1.19  | -2.44  | -1.52  | -1.75  | -7.62  | -9.74  | -9.70  | -6.79  | -6.17  | -10.14 | -9.57  | -9.30  | -10.86 | -12.08 | -9.66  |        |
| 1.21   | 0.69   | 0.35   | -0.13  | 1.73   | 1.28   | -0.68  | 0.30   | 0.62   | 1.07   | -1.04  | 0.63   | -0.07  | -1.04  | 0.71   | 0.11   | 1.07   | -4.69  | -5.12  | -3.32  | -0.92  | -2.16  | -3.42  | -3.59  | -2.44  | -3.69  | -3.74  |        |
| -11.60 | -10.42 | 1.83   | 1.99   | 5.32   | 2.14   | 0.51   | 2.18   | 1.57   | 2.56   | 2.21   | 0.80   | 0.89   | 0.81   | -0.51  | 4.15   | 1.08   | 4.45   | 5.70   | 5.43   | 8.34   | 11.90  | 9.51   | 7.74   | 8.70   | 5.74   | 5.46   | 10.46  |
| -22.70 | -19.28 | 1.43   | 3.37   | 5.63   | 2.42   | 5.45   | 4.74   | 6.33   | 6.56   | 3.96   | 1.69   | 4.43   | 3.66   | 3.34   | 4.75   | 2.83   | 8.99   | 8.89   | 8.52   | 19.48  | 22.13  | 18.52  | 15.28  | 18.76  | 15.48  | 7.47   | 23.52  |
| 6.30   | 8.42   | 0.64   | -0.64  | 2.11   | 0.65   | -1.46  | -0.39  | 1.02   | 0.12   | -0.91  | 0.66   | -0.39  | 1.16   | -3.19  | 0.03   | -1.12  | -3.32  | -2.84  | -1.74  | -14.79 | -16.37 | -12.55 | -6.72  | -14.05 | -7.94  | -0.21  | -13.48 |
| 0.73   | -1.04  | 2.91   | 0.20   | 1.10   | 0.46   | 1.50   | 2.04   | 1.98   | 0.88   | -0.76  | 0.45   | -0.55  | 0.30   | 3.24   | 0.91   | -0.20  | -0.06  | 3.55   | 2.01   | 1.46   | 3.77   | 2.92   | 1.63   | -1.55  | -0.62  | 2.16   | 1.02   |
| -0.18  | 0.27   | 2.08   | -1.10  | 1.43   | 0.86   | 1.21   | 1.49   | 0.81   | 0.99   | -0.39  | -0.17  | 0.44   | 0.72   | 0.62   | 0.14   | -0.10  | 0.08   | 5.90   | -0.35  | -0.14  | 5.55   | 0.19   | -0.08  | -1.32  | 0.26   | 0.29   | 1.23   |
| 1.21   | -1.61  | 1.66   | -4.50  | -1.76  | -3.33  | -3.11  | -0.42  | -3.74  | -0.37  | -3.01  | -4.26  | -1.13  | -1.94  | -1.21  | -2.24  | -4.45  | -1.30  | 3.88   | -4.70  | -2.39  | 4.77   | -1.65  | -2.58  | -3.05  | -2.72  | -3.70  | -3.31  |
| -4.99  | -8.12  | 3.00   | -0.52  | 1.97   | -0.82  | -1.51  | -0.37  | 0.54   | -1.17  | -2.23  | -0.73  | -1.99  | -1.20  | -4.97  | -5.27  | -1.53  | 17.18  | 33.95  | 16.46  | 4.33   | 3.61   | 5.43   | 15.72  | 1.51   | 2.10   | 36.28  | 17.20  |
| -6.75  | -8.22  | -0.75  | -0.99  | 1.78   | -1.06  | -3.13  | -0.10  | -0.55  | -1.06  | -1.11  | -1.29  | -0.63  | -2.00  | -7.04  | -0.50  | -2.39  | 18.16  | 30.52  | 13.47  | 3.69   | 0.63   | 0.86   | 17.05  | 1.86   | 19.85  | 30.57  | 15.95  |
| 6.12   | 4.36   | 3.84   | 1.37   | 3.46   | 2.26   | 2.48   | 4.81   | 4.10   | 2.52   | 1.73   | 4.58   | 1.88   | 3.27   | 1.44   | 2.94   | 3.07   | -15.78 | -17.66 | -12.84 | -17.00 | -18.86 | -14.46 | -15.39 | -17.26 | -17.48 | -17.32 | -15.55 |
| -2.14  | -2.65  | 0.73   | 0.21   | 2.52   | 0.88   | -1.05  | 1.41   | 2.68   | 0.94   | -0.66  | 1.32   | -0.79  | -0.52  | -1.74  | 0.03   | 0.09   | -0.29  | -0.32  | -0.06  | 0.56   | 0.68   | 0.01   | -0.70  | -0.95  | -4.09  | 0.94   | -0.25  |
| -0.45  | -0.79  | 1.00   | 0.96   | 3.21   | 3.01   | 2.32   | 3.44   | 1.20   | 3.62   | 1.54   | 2.15   | 1.12   | 0.74   | 0.03   | 0.94   | 1.06   | -5.41  | -6.04  | -4.79  | -4.00  | -4.52  | -2.44  | -3.01  | -4.03  | -7.88  | -5.00  | -4.02  |
| -2.37  | -0.30  | 0.8    |        |        |        |        |        |        |        |        |        |        |        |        |        |        |        |        |        |        |        |        |        |        |        |        |        |

|        |        |        |        |        |        |        |        |        |        |        |        |        |        |        |        |        |        |        |        |        |        |        |        |        |        |        |        |       |
|--------|--------|--------|--------|--------|--------|--------|--------|--------|--------|--------|--------|--------|--------|--------|--------|--------|--------|--------|--------|--------|--------|--------|--------|--------|--------|--------|--------|-------|
| 2.78   | 2.60   | 2.95   | 3.38   | 3.20   | 3.59   | 3.29   | 3.88   | 1.65   | 3.56   | 3.68   | 2.68   | 2.47   | 3.55   | 3.53   | 3.30   | 1.69   | 0.60   | 0.74   | 0.67   | 0.95   | 1.62   | 2.17   | 0.63   | 0.32   | 1.11   | 1.19   | 2.42   |       |
| 2.10   | 3.03   | 3.11   | 3.37   | 4.61   | 2.62   | 4.43   | 3.14   | 4.47   | 3.38   | 3.25   | 3.61   | 4.30   | 3.28   | 3.92   | 2.57   | 3.51   | 1.09   | 1.21   | 0.12   | 1.39   | 1.22   | 0.91   | 0.55   | 0.55   | 0.12   | 2.26   | 2.79   |       |
| 1.19   | 1.70   | 2.96   | 2.56   | 6.81   | 2.32   | 3.08   | 2.90   | 2.54   | 3.51   | 2.56   | 3.33   | 2.74   | 3.26   | 3.14   | 2.34   | 0.81   | 1.23   | 1.11   | 1.74   | -0.13  | 1.84   | 1.67   | 2.03   | 2.77   | -0.41  | 3.92   | 3.69   |       |
| -2.06  | -1.06  | 0.25   | 1.57   | 3.53   | -0.01  | -0.17  | 2.45   | 0.60   | -0.29  | -1.10  | 2.09   | 0.08   | -0.30  | 0.12   | -3.32  | -2.19  | -2.30  | -0.79  | -4.12  | -3.42  | -3.45  | -1.95  | 0.36   | -1.23  | -3.96  | -0.34  | -0.38  |       |
| -0.76  | 0.68   | 1.40   | 1.44   | 4.44   | 1.92   | 2.51   | 2.83   | 3.12   | 3.03   | 1.34   | 1.55   | 2.30   | 1.25   | 1.37   | 2.70   | 1.98   | -4.68  | -5.98  | -5.86  | -2.71  | -1.70  | -3.52  | -2.63  | -2.06  | -5.90  | -5.83  | -1.98  |       |
| 1.50   | -0.81  | 2.81   | 1.83   | 5.71   | 2.63   | 2.88   | 4.00   | 0.55   | 1.76   | 1.15   | 3.23   | 3.55   | 1.76   | 3.75   | 2.28   | 2.83   | 4.34   | 4.29   | 4.76   | 3.93   | 16.57  | 4.83   | 5.17   | 7.08   | 4.60   | 5.57   | 7.81   |       |
| 12.14  | 10.56  | 5.40   | 4.24   | 8.12   | 7.15   | 5.92   | 6.91   | 6.70   | 7.27   | 4.39   | 5.66   | 4.35   | 3.70   | 6.22   | 3.93   | 3.34   | -5.03  | -5.98  | -3.23  | -3.84  | -2.26  | -1.28  | -4.89  | -3.05  | -6.81  | -6.36  | -5.79  |       |
| -2.70  | -2.49  | 0.90   | 1.67   | 4.00   | 1.57   | 2.01   | 2.35   | 0.79   | 1.79   | 1.47   | 1.03   | 2.38   | 2.14   | 1.20   | 2.11   | 1.13   | 3.61   | 3.36   | 5.45   | 2.93   | 8.99   | 8.36   | 4.49   | 7.40   | 4.02   | 4.81   | 4.93   |       |
| -1.76  | -4.40  | 0.58   | 0.51   | 2.71   | -0.34  | 1.06   | 1.10   | 0.00   | 0.67   | 0.73   | -1.39  | -1.51  | -0.95  | -0.36  | 0.97   | -0.67  | 1.72   | 4.00   | 0.42   | -0.86  | 0.53   | 2.94   | 1.30   | 3.39   | 1.79   | 2.48   | 1.04   |       |
| 0.50   | -0.09  | 5.39   | 5.93   | 7.30   | 5.10   | 1.82   | 5.32   | 5.90   | 4.40   | 4.39   | 5.61   | 6.96   | 4.89   | 2.06   | 5.22   | 5.26   | 27.69  | 28.39  | 24.29  | 21.92  | 19.39  | 23.68  | 29.91  | 27.48  | 31.02  | 32.24  | 32.89  |       |
| -0.13  | 0.92   | 4.83   | 4.03   | 5.83   | 5.49   | 1.50   | 5.46   | 6.10   | 5.06   | 7.44   | 6.34   | 6.82   | 7.64   | 1.97   | 5.50   | 8.18   | 27.83  | 29.87  | 15.58  | 11.41  | -3.08  | 8.28   | 25.50  | 14.55  | 33.74  | 35.05  | 25.19  |       |
| 0.54   | 2.16   | -15.78 | -13.61 | -16.61 | -16.24 | -19.03 | -14.50 | -15.55 | -15.54 | -16.56 | -14.89 | -18.92 | -16.78 | -20.14 | -19.63 | -17.09 | -52.85 | -50.76 | -72.76 | -69.98 | -83.31 | -82.11 | -56.80 | -73.83 | -60.73 | -56.21 | -69.86 |       |
| -1.39  | -1.26  | -9.30  | -7.80  | -5.66  | -7.40  | -8.33  | -5.18  | -5.81  | -5.90  | -7.67  | -7.63  | -5.85  | -10.38 | -6.49  | -10.96 | -9.12  | -16.41 | -16.74 | -19.72 | -17.37 | -14.72 | -22.24 | -17.28 | -19.83 | -19.87 | -19.49 | -21.22 |       |
| 0.16   | -0.11  | -15.16 | -16.41 | -16.43 | -14.83 | -14.81 | -14.03 | -11.37 | -13.26 | -12.46 | -14.41 | -12.20 | -17.46 | -12.59 | -20.70 | -15.68 | -23.99 | -25.84 | -30.94 | -26.60 | -25.99 | -41.93 | -27.28 | -38.81 | -30.11 | -32.57 | -35.68 |       |
| 0.73   | 1.70   | 0.20   | 1.72   | -0.22  | -0.39  | -2.93  | 1.38   | 0.59   | 0.43   | 1.08   | 4.63   | 0.14   | -0.58  | -0.15  | -4.19  | 2.74   | -3.27  | -2.50  | -4.12  | -6.68  | -6.15  | -7.72  | -4.08  | -8.29  | -4.04  | -1.26  | -5.52  |       |
| -19.70 | -20.52 | -24.86 | -23.64 | -22.91 | -27.78 | -28.54 | -30.24 | -31.53 | -31.48 | -22.28 | -24.24 | -30.45 | -30.26 | -29.52 | -32.96 | -29.59 | -20.43 | -24.73 | -27.37 | -24.94 | -27.82 | -28.81 | -24.81 | -32.60 | -21.51 | -24.00 | -28.96 |       |
| 1.18   | 1.07   | 3.09   | 3.50   | 4.70   | 2.28   | 3.32   | 3.13   | 2.80   | 3.91   | 2.52   | 2.64   | 3.05   | 3.20   | 1.74   | 3.55   | 2.06   | 2.07   | 4.17   | 2.58   | 3.36   | 3.02   | 4.60   | 4.15   | 1.57   | 1.58   | 3.72   |        |       |
| 2.04   | 3.59   | 5.78   | 3.30   | 11.54  | 8.10   | 6.30   | 7.43   | 8.24   | 8.91   | 4.81   | 6.01   | 5.18   | 4.61   | 5.58   | 7.32   | 6.06   | 1.88   | 6.20   | 6.24   | 2.97   | 2.00   | 5.90   | 7.37   | 6.48   | 2.86   | 5.23   | 5.79   |       |
| -1.86  | -1.65  | -0.74  | 0.71   | 2.72   | 1.00   | 0.44   | 1.28   | -0.92  | 0.07   | -0.84  | -0.74  | 0.84   | 0.29   | 0.74   | -1.17  | -1.77  | 0.52   | 1.12   | 1.10   | -1.03  | 1.41   | 1.96   | 0.50   | 2.90   | -1.15  | 1.34   | 1.85   |       |
| -1.54  | -2.71  | 0.01   | -1.09  | -0.30  | -0.54  | -0.42  | -1.00  | 0.26   | 0.06   | -0.72  | -0.80  | -0.66  | -0.77  | -0.45  | -0.44  | 0.12   | -0.07  | 0.25   | 1.21   | -0.32  | 1.50   | 0.69   | 1.10   | 0.33   | -0.28  | 0.42   | 2.65   |       |
| -1.19  | 0.64   | 1.74   | 2.62   | 4.40   | 2.08   | 1.41   | 3.03   | 3.26   | 2.14   | 0.97   | 2.06   | 2.55   | 2.76   | 0.70   | 1.88   | 0.70   | 1.48   | 0.68   | 2.73   | 3.50   | 2.68   | 3.91   | 2.22   | 1.96   | 2.72   | 3.41   | 1.88   |       |
| -4.40  | -5.46  | -9.64  | -14.50 | -7.17  | -12.83 | -10.59 | -5.64  | -8.76  | -10.53 | -9.55  | -16.25 | -12.36 | -8.17  | -4.77  | -5.67  | -13.83 | -3.64  | -4.94  | -6.17  | -6.67  | 16.21  | -2.25  | 3.13   | -1.51  | -8.78  | -6.22  | -9.65  |       |
| -4.94  | -6.41  | -17.96 | -24.92 | -15.08 | -17.27 | -14.73 | -9.98  | -14.74 | -15.63 | -18.11 | -22.58 | -18.61 | -10.88 | -3.01  | -8.20  | -20.70 | -7.38  | -9.58  | -6.68  | -2.64  | 15.30  | -0.96  | 0.19   | -1.29  | -13.75 | -10.45 | -8.17  |       |
| -5.67  | -10.39 | -26.58 | -35.03 | -23.14 | -24.33 | -20.50 | -17.43 | -23.66 | -19.71 | -28.43 | -34.78 | -29.36 | -17.02 | -2.28  | -16.41 | -30.71 | -10.08 | -7.33  | -2.12  | 8.97   | -3.14  | -2.01  | -1.80  | -1.77  | -18.60 | -13.23 |        |       |
| -2.68  | -1.69  | 0.49   | -0.27  | 0.42   | -0.81  | -2.86  | -1.91  | -0.49  | -0.97  | -1.47  | -2.02  | 0.06   | -1.74  | -3.77  | 0.71   | 0.52   | 3.91   | 14.08  | 0.53   | -3.98  | -6.95  | -5.21  | 4.13   | -2.72  | 5.57   | 16.65  | 2.70   |       |
| -3.06  | -2.88  | -0.25  | 0.46   | 2.13   | -0.82  | -4.14  | -2.37  | 0.80   | -0.80  | 2.07   | -0.29  | -0.61  | -1.19  | -5.17  | -1.23  | -2.17  | 2.87   | 14.05  | -2.91  | -6.27  | -10.16 | 2.42   | -6.03  | 5.32   | 19.25  | -0.72  |        |       |
| 10.90  | 12.54  | 2.83   | 2.11   | 4.11   | 4.77   | 1.19   | 4.02   | 3.73   | 1.99   | 1.98   | 4.82   | 4.90   | 4.14   | 0.58   | 2.39   | 3.86   | -29.40 | -36.60 | -28.48 | -30.23 | -41.18 | -29.76 | -30.59 | -37.19 | -36.33 | -39.39 | -34.49 |       |
| -4.08  | -3.37  | 4.49   | 3.90   | 7.19   | 4.65   | 5.50   | 4.59   | 3.27   | 5.63   | 3.05   | 5.89   | 2.22   | 3.32   | 0.62   | 9.59   | 1.62   | 3.03   | 8.55   | 4.81   | 2.75   | 1.95   | 3.99   | 6.97   | 2.13   | 3.77   | 8.12   | 2.66   |       |
| -4.62  | -12.12 | 35.02  | 34.78  | 38.90  | 31.71  | 32.40  | 32.12  | 34.70  | 28.34  | 30.43  | 32.58  | 37.14  | 33.17  | 36.01  | 36.00  | 35.76  | 58.12  | 66.45  | 65.44  | 57.01  | 67.37  | 68.67  | 71.41  | 62.23  | 60.83  | 78.79  | 65.54  |       |
| 4.16   | 2.67   | 3.07   | 0.59   | 1.02   | 2.69   | 2.97   | 0.13   | 1.46   | 2.73   | 2.82   | -0.28  | 2.26   | 3.05   | -0.67  | 0.03   | 1.58   | 2.23   | -1.28  | -2.14  | 3.59   | -7.32  | 0.54   | -2.12  | 0.78   | 3.24   | -0.37  | -4.30  |       |
| 3.14   | 2.88   | -1.10  | -2.04  | -0.35  | -0.65  | 1.08   | -0.44  | 1.10   | 2.48   | 0.90   | -0.23  | 1.38   | 1.14   | 1.72   | -1.10  | 0.77   | -6.05  | -7.67  | -6.14  | -5.75  | -5.47  | -11.47 | -6.27  | -6.99  | -9.02  | -8.58  | -11.31 |       |
| 3.47   | 3.64   | -1.75  | -1.41  | -0.19  | 0.37   | -0.17  | -0.39  | 1.29   | 0.50   | -1.01  | -0.52  | -0.79  | -1.48  | -1.19  | -0.77  | -0.21  | -9.59  | -9.66  | -10.21 | -6.99  | -8.17  | -11.23 | -10.24 | -10.21 | -12.75 | -13.46 | -11.29 |       |
| 1.50   | 0.88   | -0.41  | 1.59   | 3.04   | 0.23   | 0.36   | -0.32  | 1.29   | 0.01   | -0.60  | 0.40   | 0.46   | -0.53  | 1.83   | 0.01   | 0.95   | -3.54  | -5.36  | -3.28  | -1.60  | -3.48  | -3.80  | -4.29  | -2.18  | -4.68  | -5.22  | -4.39  |       |
| -12.10 | -10.18 | 0.23   | 1.97   | 4.41   | 0.97   | -0.04  | 0.93   | 1.74   | 1.69   | 0.89   | 0.52   | 1.02   | -0.54  | -2.07  | 2.53   | -0.36  | 4.31   | 5.46   | 5.17   | 7.96   | 11.52  | 9.60   | 7.05   | 8.90   | 6.52   | 5.77   | 11.92  |       |
| -24.35 | -21.51 | 0.29   | 1.77   | 5.11   | 1.43   | 3.44   | 2.73   | 4.82   | 4.26   | 3.18   | 1.19   | 3.90   | 1.72   | 1.37   | 3.61   | 2.36   | 9.43   | 7.70   | 7.92   | 19.92  | 22.75  | 18.92  | 15.69  | 17.97  | 14.24  | 7.38   | 22.12  |       |
| 7.21   | 9.57   | 1.12   | 2.03   | 1.99   | 0.95   | -0.50  | 1.77   | 2.36   | 0.46   | 0.21   | 0.62   | 0.45   | 0.93   | -2.60  | -1.20  | -0.49  | -3.70  | -2.95  | -1.31  | -14.74 | -17.43 | -13.10 | -6.15  | -13.15 | -7.21  | -0.50  | -13.81 |       |
| 0.26   | -0.34  | 2.69   | 0.76   | 1.82   | 2.14   | 1.90   | 2.02   | 1.92   | 1.69   | -0.62  | 0.42   | -0.07  | 0.03   | 0.81   | 1.50   | 0.38   | 0.44   | 3.66   | 2.50   | 1.99   | 3.23   | 2.53   | 1.47   | 1.08   | -0.80  | 2.76   | 1.01   |       |
| 0.03   | 0.21   | 2.11   | -0.88  | 1.45   | 0.28   | 1.08   | 1.41   | 0.92   | 0.70   | -0.24  | -0.69  | -0.03  | 0.80   | 1.19   | -0.14  | -0.24  | 0.22   | 5.88   | -0.32  | -0.10  | 5.12   | 0.48   | 0.30   | -0.52  | -0.62  | -0.14  | 1.09   |       |
| 1.05   | -1.06  | 0.54   | -4.61  | -2.23  | -4.17  | -2.65  | -0.08  | -3.24  | -2.84  | -2.98  | -4.12  | -0.25  | -2.44  | -2.10  | -2.96  | -4.12  | -2.32  | 4.17   | -4.79  | -2.27  | 4.40   | -3.15  | -2.21  | -4.80  | -3.27  | -3.79  | -3.77  |       |
| -4.54  | -7.10  | -0.63  | -1.14  | 1.26   | -1.15  | -1.52  | -1.31  | -1.32  | -2.12  | -2.26  | -1.97  | -2.56  | -2.31  | -4.94  | -0.46  | -2.15  | 1.18   | 35.08  | 18.19  | 3.99   | 3.77   | 5.21   | 16.21  | 1.94   | 19.40  | 37.74  | 18.98  |       |
| -6.87  | -9.11  | -1.12  | -1.70  | 0.29   | -1.23  | -3.30  | -1.49  | -2.72  | -1.60  | -1.57  | -2.20  | -2.68  | -2.59  | -7.08  | -1.38  | -3.19  | 19.89  | 31.25  | 12.86  | 5.63   | 1.76   | 0.69   | 17.50  | 1.93   | 19.98  | 31.77  | 17.98  |       |
| 5.30   | 5.21   | 3.40   | 0.90   | 3.57   | 2.90   | 1.93   | 6.12   | 4.19   | 3.79   | 2.76   | 3.69   | 4.07   | 3.68   | 2.23   | 3.94   | 3.85   | -16.96 | -17.75 | -12.42 | -17.89 | -19.92 | -14.41 | -14.39 | -18.23 | -16.99 | -16.28 | -16.81 |       |
| -2.49  | -2.19  | -0.15  | 0.79   | 2.75   | 1.04   | -1.25  | 2.37   | 2.83   | 0.61   | 0.33   | 1.61   | -0.64  | -1.26  | -1.51  | 0.62   | -0.73  | -1.30  | -0.15  | -0.90  | 0.37   | 0.35   | -0.63  | -0.77  | -0.74  | -3.99  | -1.13  | -1.87  |       |
| -0.96  | -1.46  | 1.60   | 1.25   | 3.53   | 2.83   | 3.07   | 3.50   | 1.49   | 3.74   | 1.63   | 1.35   | 1.11   | 0.62   | 0.06   | 0.06   | 0.06   | 1.39   | -5.23  | -6.50  | -4.62  | -3.45  | -3.88  | -2.21  | -3.32  | -4.55  | -8.38  | -5.20  | -4.89 |
| -1.43  | -0.14  | 1.32   | -0.48  | 2.41   | 0.08   | 1.27   | 2.40   | 4.93   | 2.21   | 2.21   | 0.85   | 1.70   | -0.56  | 1.26   | -0.60  | 1.12   | 2.63   | 3.97   | 3.86   | 3.92   | 1.92   | 5.72   | 3.06   | 3.59   | 5.10   | 2.21   | 2.56   |       |
| -2.82  | -5.72  | 10.63  | 11.03  | 15.15  | 9.98   | 11.43  | 13.50  | 11.57  | 11.23  | 12.02  | 11.76  | 11.65  | 10.70  | 8.73   | 11.82  | 10.09  | 24.32  | 30.97  | 30.14  | 26.82  | 24.57  | 32.21  | 28.29  | 30.41  | 26.88  | 40.58  | 25.88  |       |
| 5.77   | -7.88  | 24.85  | 23.05  | 31.61  | 29.66  | 19.05  | 24.08  | 24.12  | 25.88  | 25.91  | 25.03  | 26.54  | 29.95  | 24.42  | 29.70  | 26.42  | 82.97  | 84.31  | 92.26  | 89.20  | 89.35  | 99.13  | 88.67  | 90.91  |        |        |        |       |

|        |        |        |        |        |        |        |        |        |        |        |        |        |        |        |        |        |        |        |        |        |        |        |        |        |        |        |        |
|--------|--------|--------|--------|--------|--------|--------|--------|--------|--------|--------|--------|--------|--------|--------|--------|--------|--------|--------|--------|--------|--------|--------|--------|--------|--------|--------|--------|
| -1.30  | -1.19  | -0.08  | 1.01   | 3.59   | -0.47  | -0.64  | 2.67   | 1.69   | -0.43  | -0.82  | 1.33   | 0.10   | -0.57  | -0.24  | -0.80  | -2.43  | -1.37  | -1.08  | -2.62  | -1.59  | -5.43  | -1.14  | 0.00   | -0.32  | -4.43  | 0.61   | -0.62  |
| -0.83  | 0.48   | 1.96   | 1.75   | 4.10   | 2.74   | 2.79   | 2.88   | 2.61   | 3.32   | 1.53   | 2.23   | 2.57   | 1.19   | 1.88   | 2.05   | 1.60   | -4.85  | -5.43  | -4.81  | -1.74  | -2.61  | -3.91  | -3.23  | -1.81  | -6.01  | -5.89  | -1.66  |
| 1.47   | -1.00  | 1.55   | 2.08   | 4.71   | 2.35   | 2.67   | 3.80   | 3.21   | 2.41   | 1.88   | 3.53   | 2.86   | 0.64   | 2.79   | 2.80   | 1.91   | 2.79   | 4.10   | 5.03   | 2.92   | 10.74  | 4.05   | 5.24   | 6.25   | 3.74   | 4.69   | 7.61   |
| 12.12  | 10.68  | 5.86   | 5.29   | 10.33  | 7.40   | 7.03   | 8.54   | 7.04   | 8.95   | 5.92   | 6.36   | 5.70   | 4.39   | 6.77   | 6.05   | 4.63   | -3.88  | -6.16  | -3.64  | -4.60  | -1.69  | -2.01  | -4.61  | -2.56  | -6.56  | -5.94  | -6.36  |
| -2.63  | -2.10  | 0.40   | 1.06   | 3.20   | 1.85   | 1.54   | 2.38   | 1.22   | 1.41   | 1.19   | 0.57   | 2.30   | 1.81   | 1.01   | 1.95   | 1.52   | 3.66   | 3.14   | 5.48   | 3.10   | 9.32   | 8.78   | 4.81   | 7.72   | 4.47   | 5.05   | 5.83   |
| -1.59  | -3.32  | -0.21  | 0.53   | 4.21   | -0.49  | 1.54   | 4.05   | 0.66   | 0.12   | -1.41  | -0.59  | -0.06  | -1.69  | -0.06  | 0.74   | -0.91  | 1.29   | 2.17   | 0.74   | -1.54  | 0.01   | 2.65   | 1.16   | 2.71   | 1.97   | 1.95   | 1.58   |
| 0.10   | 0.00   | 4.03   | 3.52   | 7.78   | 4.42   | 0.66   | 5.82   | 5.29   | 3.90   | 5.19   | 5.31   | 5.28   | 4.14   | 1.72   | 4.03   | 4.97   | 29.32  | 26.56  | 25.23  | 22.12  | 21.17  | 25.14  | 28.81  | 27.63  | 31.55  | 31.26  | 36.22  |
| 0.07   | 1.03   | 4.32   | 4.43   | 5.26   | 4.63   | 1.52   | 4.42   | 6.09   | 4.66   | 7.32   | 5.76   | 5.98   | 6.37   | 1.04   | 6.02   | 7.05   | 29.46  | 28.93  | 15.52  | 12.34  | -2.39  | 8.34   | 25.75  | 16.59  | 34.80  | 34.78  | 28.31  |
| 1.41   | 2.33   | -13.72 | -13.72 | -13.25 | -13.95 | -15.73 | -12.15 | -12.48 | -13.34 | -12.37 | -12.43 | -11.84 | -14.98 | -17.13 | -17.17 | -14.81 | -53.53 | -51.31 | -72.74 | -71.67 | -86.06 | -81.57 | -56.69 | -71.83 | -62.69 | -56.14 | -69.99 |
| -0.71  | -1.59  | -8.21  | -7.84  | -4.26  | -6.64  | -7.79  | -5.51  | -6.72  | -5.13  | -6.55  | -6.82  | -5.20  | -9.51  | -7.17  | -10.12 | -8.85  | -16.35 | -16.52 | -20.12 | -18.21 | -15.97 | -22.81 | -16.88 | -19.20 | -20.68 | -19.92 | -20.54 |
| 1.43   | 0.99   | -14.27 | -15.16 | -15.25 | -12.72 | -12.59 | -11.77 | -9.64  | -11.86 | -11.97 | -12.81 | -10.94 | -16.04 | -10.58 | -18.83 | -13.29 | -23.28 | -26.01 | -31.47 | -25.85 | -25.33 | -41.23 | -26.19 | -37.14 | -29.86 | -33.01 | -33.99 |
| 0.29   | 0.37   | 0.28   | 1.67   | 1.89   | -0.81  | -3.21  | 1.99   | 1.51   | 2.30   | 2.05   | 4.01   | 1.84   | -0.30  | -0.25  | -2.81  | 1.90   | -3.30  | -2.99  | -4.09  | -6.76  | -6.48  | -8.07  | -4.26  | -8.62  | -3.75  | -1.29  | -4.86  |
| -20.54 | -22.48 | -26.62 | -25.08 | -24.30 | -29.38 | -28.55 | -32.12 | -32.99 | -33.36 | -23.24 | -25.56 | -31.46 | -31.19 | -31.58 | -33.39 | -30.13 | -22.29 | -26.23 | -29.16 | -25.99 | -27.63 | -31.21 | -26.84 | -32.94 | -23.47 | -26.28 | -30.99 |
| 1.44   | 1.41   | 3.04   | 3.21   | 5.02   | 2.33   | 2.94   | 4.28   | 2.51   | 3.89   | 2.10   | 2.79   | 3.81   | 2.46   | 2.27   | 3.67   | 2.28   | 2.61   | 4.17   | 3.34   | 3.91   | 3.77   | 3.59   | 5.50   | 3.40   | 2.68   | 1.34   | 3.29   |
| 2.85   | 3.39   | 6.97   | 3.82   | 11.42  | 8.37   | 8.04   | 7.68   | 9.20   | 8.61   | 5.78   | 6.50   | 5.19   | 4.52   | 6.27   | 8.05   | 6.33   | 1.54   | 5.95   | 6.50   | 4.88   | 3.24   | 7.28   | 8.66   | 8.45   | 5.19   | 4.61   | 6.29   |
| -1.30  | -1.59  | -0.59  | 0.82   | 2.02   | -0.03  | 0.50   | 1.80   | -0.50  | 0.09   | -1.25  | -0.56  | 0.06   | -0.23  | 1.12   | 0.59   | -2.15  | 0.69   | 1.42   | 1.27   | -0.27  | 1.65   | 2.14   | 1.00   | 2.43   | -0.91  | 1.68   | 2.77   |
| -2.10  | -2.50  | -0.06  | -1.95  | -4.07  | -0.15  | -0.12  | -0.88  | -0.14  | -0.08  | -0.93  | -0.54  | 0.01   | -0.74  | -0.72  | 0.07   | -0.33  | 0.35   | -0.23  | 0.94   | 0.34   | 1.32   | 1.57   | 0.84   | 0.55   | -0.12  | 1.34   | 2.58   |
| -1.83  | -0.18  | 1.01   | 3.74   | 3.79   | 2.00   | 0.95   | 4.21   | 2.13   | 2.80   | 1.16   | 1.62   | 2.48   | 3.10   | 2.70   | 1.65   | 1.19   | 1.44   | -0.26  | 3.37   | 2.78   | 2.47   | 4.84   | 2.74   | 1.98   | 3.39   | 2.31   | 2.99   |
| -9.69  | -7.81  | -9.48  | -16.65 | -7.96  | -7.28  | -10.87 | -5.91  | -7.79  | -8.75  | -10.61 | -16.94 | -12.85 | -8.80  | -4.98  | -6.61  | -15.06 | -4.48  | -6.12  | -6.44  | -4.48  | -17.59 | -0.02  | 3.20   | -1.99  | -9.91  | -5.43  | -9.47  |
| -12.62 | -8.63  | -18.02 | -25.11 | -15.97 | -12.12 | -15.36 | -11.84 | -15.39 | -14.00 | -19.19 | -24.25 | -18.95 | -11.83 | -2.95  | -8.77  | -21.21 | -7.95  | -10.59 | -5.30  | -3.55  | 15.72  | 0.21   | -0.19  | -1.67  | -14.38 | -11.02 | -9.37  |
| -20.37 | -15.03 | -28.55 | -37.49 | -24.55 | -20.02 | -21.11 | -18.14 | -23.11 | -18.39 | -29.28 | -36.07 | -30.08 | -17.74 | -2.38  | -15.22 | -32.87 | -12.31 | -14.00 | -8.20  | -4.23  | 10.39  | -2.63  | -3.16  | -1.63  | -18.36 | -19.84 | -14.45 |
| -2.27  | -2.23  | -0.42  | -0.71  | 1.21   | -1.22  | -3.46  | -1.83  | -0.26  | -0.54  | -2.08  | -2.54  | -1.12  | -1.50  | -3.38  | -0.91  | 0.35   | 4.48   | 13.68  | 0.30   | -3.81  | -7.13  | -5.29  | 4.44   | -3.38  | 6.08   | 17.14  | 3.68   |
| -2.93  | -3.22  | -0.35  | -0.28  | 1.78   | -0.88  | -3.82  | -2.41  | 1.27   | -1.16  | 0.66   | -0.59  | 0.08   | -1.98  | -4.80  | -1.47  | -1.84  | 3.08   | 13.78  | -2.20  | -7.08  | -13.42 | -10.50 | 2.36   | -5.54  | 5.15   | 18.97  | -0.48  |
| 11.49  | 12.84  | 5.84   | 3.72   | 4.75   | 6.45   | 3.10   | 5.21   | 4.68   | 3.35   | 3.06   | 5.98   | 4.62   | 4.89   | 2.12   | 3.03   | 3.92   | -28.92 | -32.63 | -28.52 | -31.99 | -41.76 | -28.04 | -30.53 | -37.21 | -35.30 | -39.45 | -35.36 |
| -2.77  | -5.35  | 3.90   | 3.30   | 7.49   | 3.72   | 5.10   | 5.83   | 3.88   | 4.95   | 2.48   | 6.13   | 3.84   | 4.30   | 0.90   | 4.81   | 2.19   | 1.95   | 8.34   | 4.97   | 3.26   | 1.58   | 4.07   | 7.20   | 3.12   | 3.63   | 8.41   | 3.17   |
| -6.33  | -12.64 | 30.98  | 32.10  | 36.45  | 25.32  | 27.59  | 28.23  | 31.10  | 26.71  | 26.83  | 29.68  | 34.27  | 29.15  | 31.32  | 33.68  | 32.74  | 57.02  | 65.99  | 65.39  | 65.95  | 68.70  | 68.56  | 71.26  | 61.73  | 61.29  | 78.68  | 65.92  |
| 5.31   | 0.85   | 3.23   | -0.28  | 0.50   | 1.68   | 2.49   | 0.61   | 1.37   | 2.39   | 2.74   | 0.80   | 2.79   | 1.94   | -0.94  | 1.07   | 1.87   | -0.20  | -2.29  | -2.64  | 3.43   | -7.99  | 0.20   | -2.39  | 1.66   | 4.02   | -0.64  | -4.53  |
| 3.54   | 3.78   | -0.86  | -1.44  | 0.71   | 0.76   | 0.74   | -0.44  | 1.34   | 2.73   | 0.87   | 0.17   | 1.73   | 2.45   | 2.26   | -0.12  | 1.83   | -7.40  | -8.04  | -6.80  | -6.92  | -6.28  | -11.87 | -6.10  | -7.65  | -9.47  | -8.36  | -11.25 |
| 4.06   | 3.98   | -0.95  | -0.98  | 0.11   | 0.56   | 0.10   | 0.26   | 1.84   | 1.17   | -0.38  | -0.75  | 0.06   | -0.69  | -0.13  | 0.15   | 0.23   | -10.12 | -9.81  | -10.20 | -7.62  | -8.54  | -12.26 | -10.00 | -10.27 | -12.84 | -13.41 | -12.72 |
| 1.61   | 0.83   | 0.82   | 1.56   | 2.32   | 1.69   | 0.03   | 0.08   | 2.12   | 1.86   | -0.28  | 0.44   | 0.60   | 0.19   | 2.48   | 1.82   | 1.07   | -4.53  | -4.61  | -3.98  | -1.68  | -4.07  | -4.48  | -3.79  | -5.03  | -4.25  | -5.50  | -5.50  |
| -12.98 | -11.88 | 0.06   | 1.74   | 4.48   | -0.29  | -2.13  | 1.03   | 1.17   | -0.12  | 0.41   | 0.23   | 0.58   | -0.53  | -1.90  | 2.08   | 0.23   | 3.45   | 6.88   | 4.92   | 8.82   | 11.40  | 10.34  | 8.16   | 9.18   | 6.41   | 7.43   | 11.42  |
| -25.48 | -22.05 | -1.27  | 1.72   | 4.06   | 0.08   | 0.96   | 0.74   | 2.76   | 2.88   | 0.83   | 0.37   | 2.76   | -0.63  | -0.46  | 2.14   | 0.02   | 9.47   | 8.39   | 8.86   | 19.72  | 22.97  | 18.31  | 15.96  | 18.65  | 14.72  | 6.54   | 23.22  |
| 8.02   | 9.82   | 1.97   | 1.37   | 1.64   | 1.30   | 1.10   | 1.20   | 2.35   | 0.97   | 2.14   | 1.23   | 0.44   | 1.37   | -2.24  | -0.06  | 1.63   | -5.20  | -2.84  | -1.49  | -14.28 | -16.72 | -11.13 | -5.31  | -13.28 | -7.23  | 0.33   | -12.50 |
| 0.92   | 0.99   | 2.85   | 1.11   | 1.43   | 0.78   | 1.94   | 1.95   | 2.12   | 2.22   | -1.04  | 1.07   | 0.75   | -0.24  | 3.64   | 1.28   | 1.25   | 0.67   | 3.80   | 2.38   | 1.46   | 3.21   | 2.31   | 1.27   | 0.79   | -0.77  | 1.62   | 1.03   |
| 0.57   | 1.35   | 2.21   | -1.30  | 0.80   | 0.83   | 1.01   | 1.40   | 1.08   | 0.70   | -0.05  | -0.54  | -0.54  | 0.77   | -0.55  | 0.81   | -0.97  | -0.03  | 5.71   | -0.37  | 0.05   | 5.61   | 0.01   | -0.01  | -0.77  | -0.54  | 0.85   | 1.19   |
| 0.54   | -1.78  | 0.31   | -4.71  | -2.58  | -3.75  | -2.71  | -0.97  | -2.91  | -2.47  | -4.37  | -4.23  | -0.50  | -2.19  | -2.11  | -2.14  | -3.90  | -2.23  | 3.74   | -5.00  | -4.60  | 4.43   | -3.71  | -2.58  | -4.48  | -4.28  | -5.06  | -2.46  |
| -4.67  | -8.05  | -1.54  | -1.90  | 3.38   | -3.80  | -2.80  | -1.89  | -1.52  | -0.86  | -2.56  | -2.67  | -1.98  | -3.70  | -1.05  | -6.85  | -1.17  | -2.96  | 18.31  | 34.66  | 17.54  | 4.68   | 4.25   | 5.44   | 15.92  | 1.48   | 4.66   | 17.82  |
| -6.91  | -8.45  | -2.09  | -2.74  | -0.33  | -2.78  | -4.39  | -1.65  | -3.74  | -2.62  | -2.98  | -3.52  | -2.36  | -3.62  | -9.14  | -2.36  | -4.50  | 19.23  | 30.81  | 13.95  | 5.41   | 1.64   | 0.11   | 17.41  | 2.12   | 20.59  | 32.43  | 18.29  |
| 6.08   | 6.25   | 3.34   | 2.59   | 4.04   | 3.12   | 3.23   | 5.65   | 8.86   | 4.90   | 4.01   | 4.79   | 5.15   | 4.67   | 3.34   | 3.99   | 4.18   | -16.80 | -18.27 | -12.20 | -17.93 | -20.62 | -14.68 | -14.44 | -17.94 | -17.29 | -17.15 | -17.03 |
| -2.59  | -2.56  | 0.00   | -0.21  | 3.61   | 2.13   | -1.58  | 2.23   | 2.67   | 1.34   | 0.32   | 2.01   | -0.04  | -1.64  | -1.47  | -0.15  | 0.17   | -0.78  | -0.88  | -2.01  | -1.15  | 1.59   | -0.22  | -0.47  | -1.28  | -4.09  | 0.43   | -1.48  |
| -0.17  | -0.39  | 1.00   | 0.80   | 3.38   | 3.43   | 2.07   | 3.03   | 1.57   | 3.74   | 1.46   | 0.63   | 2.36   | 0.99   | 0.20   | 1.08   | 1.19   | -5.83  | -6.15  | -3.82  | -3.39  | -3.77  | -2.87  | -2.98  | -4.01  | -8.01  | -5.26  | -4.70  |
| -1.59  | -1.24  | 0.74   | 0.68   | 1.66   | 1.48   | 1.57   | 2.61   | 3.52   | 2.46   | 2.44   | 0.48   | -0.24  | -2.27  | 2.22   | 0.47   | 1.93   | 3.19   | 3.47   | 4.08   | 3.11   | 2.20   | 6.12   | 2.56   | 2.86   | 5.72   | 2.03   | 3.26   |
| -3.89  | -5.98  | 9.30   | 8.99   | 14.60  | 7.99   | 8.06   | 12.36  | 8.76   | 10.26  | 9.66   | 10.27  | 9.81   | 9.43   | 6.66   | 11.61  | 9.22   | 24.30  | 29.69  | 30.21  | 26.99  | 25.02  | 31.25  | 48.45  | 29.96  | 28.18  | 40.06  | 26.84  |
| -6.00  | -8.55  | 20.66  | 20.01  | 28.32  | 25.20  | 17.22  | 20.65  | 21.70  | 23.01  | 23.67  | 22.62  | 25.12  | 25.61  | 20.97  | 26.36  | 23.85  | 83.73  | 84.39  | 92.21  | 90.03  | 91.77  | 100.05 | 89.01  | 90.74  | 88.29  | 95.47  | 87.70  |
| 9.90   | 10.73  | -9.66  | -12.16 | -12.82 | -8.85  | -15.70 | -10.77 | -9.17  | -9.16  | -5.48  | -10.24 | -11.61 | -9.92  | -14.99 | -14.51 | -11.01 | -24.30 | -30.79 | -35.58 | -38.17 | -55.63 | -51.57 | -26.80 | -45.45 | -34.33 | -34.13 | -39.87 |
| -3.22  | -7.69  | -16.49 | -17.22 | -11.55 | -9.96  | -11.79 | -8.59  | -9.81  | -6.26  | -9.63  | -14.55 | -12.00 | -10.71 | -7.62  | -5.03  | -9.92  | -11.24 | -9.90  | -2.18  | -4.12  | -6.31  | -11.97 | -6.43  | -7.33  | -5.34  | -8.74  | -12.59 |
| -5.39  | -10.70 | -23.83 | -24.58 | -18.19 | -15.54 | -14.62 | -12.43 | -16.93 | -9.90  | -13.60 | -19.17 | -13.57 | -14.92 | -5.48  | -5.48  | -15.82 | -13.17 | -16.12 |        |        |        |        |        |        |        |        |        |

|        |        |        |        |        |        |        |        |        |        |        |        |        |        |         |        |        |        |        |        |        |        |        |        |        |        |        |        |
|--------|--------|--------|--------|--------|--------|--------|--------|--------|--------|--------|--------|--------|--------|---------|--------|--------|--------|--------|--------|--------|--------|--------|--------|--------|--------|--------|--------|
| 13.32  | 10.88  | 6.85   | 6.33   | 10.59  | 7.29   | 8.12   | 8.50   | 7.15   | 10.20  | 5.85   | 8.03   | 6.00   | 5.50   | 7.36    | 6.72   | 6.09   | -4.84  | -5.79  | -4.28  | -4.33  | -1.87  | -1.88  | -4.22  | -3.47  | -7.03  | -6.08  | -5.22  |
| -2.57  | -2.50  | 0.31   | 0.53   | 2.86   | 1.88   | 1.77   | 1.99   | 1.68   | 1.62   | 0.44   | 0.59   | 2.11   | 1.66   | 2.07    | 2.12   | 0.42   | 4.00   | 3.73   | 5.77   | 3.21   | 8.18   | 8.60   | 4.85   | 7.67   | 5.11   | 5.02   | 5.33   |
| -2.84  | -1.49  | -0.26  | -0.13  | 3.60   | -0.39  | 0.02   | 1.90   | 0.23   | 0.25   | -0.07  | -1.45  | -1.39  | -2.17  | -0.82   | 1.34   | -0.34  | 1.79   | 1.08   | 1.23   | -1.09  | -0.15  | 2.26   | 0.97   | 3.69   | 2.04   | 0.95   | 1.18   |
| 0.39   | 0.41   | 3.61   | 3.64   | 7.01   | 4.21   | 0.97   | 4.44   | 4.53   | 3.09   | 3.42   | 3.85   | 5.37   | 3.39   | 1.87    | 3.61   | 4.94   | 29.76  | 26.80  | 23.13  | 23.45  | 21.22  | 23.37  | 28.44  | 27.76  | 32.36  | 31.45  | 36.98  |
| 0.22   | 0.20   | 3.36   | 4.42   | 4.68   | 4.11   | 0.51   | 3.52   | 5.18   | 3.80   | 6.19   | 5.54   | 5.60   | 6.15   | 1.36    | 4.67   | 6.01   | 29.64  | 29.23  | 15.53  | 11.89  | -2.10  | 9.31   | 25.20  | 15.71  | 34.97  | 34.02  | 28.65  |
| 1.03   | 3.00   | -11.67 | -12.04 | -12.34 | -11.89 | -13.79 | -10.17 | -10.91 | -11.79 | -10.62 | -12.96 | -16.21 | -12.76 | -14.07  | -15.80 | -13.10 | -53.10 | -50.48 | -71.52 | -70.58 | -85.97 | -81.49 | -55.54 | -71.95 | -61.71 | -55.62 | -69.64 |
| -0.31  | -0.98  | -7.34  | -7.14  | -5.47  | -5.69  | -6.68  | -3.61  | -4.19  | -4.66  | -6.24  | -7.01  | -6.01  | -8.25  | -5.97   | -9.85  | -8.34  | -15.08 | -15.74 | -19.35 | -17.29 | -15.32 | -21.90 | -17.44 | -18.87 | -19.43 | -19.99 | -19.29 |
| 2.95   | 2.22   | -11.95 | -14.17 | -13.17 | -11.38 | -11.19 | -10.31 | -8.73  | -9.74  | -10.18 | -11.04 | -9.25  | -13.96 | -9.53   | -17.54 | -12.67 | -22.63 | -24.88 | -30.62 | -25.81 | -24.57 | -39.91 | -25.49 | -36.54 | -29.16 | -31.93 | -32.57 |
| -0.25  | 0.79   | -0.33  | 1.78   | 0.23   | -0.70  | -2.76  | 1.85   | 1.72   | 2.61   | 1.12   | 4.38   | 0.61   | 0.17   | 1.72    | -1.79  | 1.74   | -2.99  | -2.90  | -4.88  | -6.04  | -5.71  | -8.34  | -4.38  | -8.69  | -4.92  | -1.19  | -3.81  |
| -21.01 | -23.37 | -27.10 | -25.95 | -25.59 | -30.90 | -30.84 | -33.30 | -35.27 | -34.17 | -23.67 | -26.73 | -34.82 | -32.87 | -32.37  | -34.97 | -30.81 | -23.57 | -27.29 | -29.39 | -27.23 | -28.80 | -33.60 | -27.67 | -36.27 | -24.40 | -27.01 | -33.59 |
| 1.37   | 1.66   | 3.25   | 2.98   | 5.06   | 2.79   | 3.45   | 4.12   | 3.10   | 4.04   | 1.55   | 3.09   | 3.56   | 2.52   | 1.92    | 2.95   | 2.27   | 1.70   | 3.77   | 2.94   | 3.15   | 3.84   | 4.29   | 5.01   | 4.43   | 2.63   | 1.54   | 3.35   |
| 2.61   | 4.30   | 6.63   | 3.57   | 11.30  | 7.92   | 8.21   | 7.71   | 9.60   | 9.81   | 5.20   | 6.38   | 5.68   | 4.23   | 6.14    | 7.75   | 6.71   | 2.66   | 7.29   | 6.23   | 4.22   | 4.89   | 8.83   | 8.37   | 8.98   | 5.21   | 5.10   | 5.86   |
| -0.62  | -2.15  | -1.42  | 0.33   | 2.06   | 5.00   | 1.21   | 1.58   | -1.23  | -1.28  | -0.60  | -0.72  | -0.69  | 0.50   | 0.95    | 0.74   | -0.91  | 0.70   | 0.87   | 0.59   | -0.46  | 1.14   | 2.20   | 0.75   | 3.13   | 0.17   | 1.12   | 3.60   |
| -1.90  | -2.59  | -0.46  | -1.84  | -0.21  | -0.64  | -0.78  | -1.43  | -0.08  | 0.44   | -1.29  | -0.77  | -0.70  | -0.97  | -1.52   | -0.51  | -0.50  | -0.03  | -0.17  | 1.86   | 0.32   | 1.62   | 2.12   | 1.03   | -0.24  | -0.05  | 1.37   | 2.14   |
| -0.86  | 0.94   | 1.64   | 2.68   | 2.78   | 3.36   | 2.65   | 3.91   | 2.41   | 2.09   | 0.26   | 2.11   | 2.82   | 3.44   | 2.44    | 3.26   | 2.24   | 1.04   | 1.25   | 2.37   | 3.38   | 2.98   | 3.75   | 2.20   | 2.23   | 3.21   | 2.03   | 1.95   |
| -11.88 | -10.30 | -11.28 | -17.10 | -8.85  | -8.92  | -11.23 | -4.99  | -8.41  | -8.90  | -10.85 | -18.06 | -13.82 | -9.53  | -0.76   | -7.23  | -14.14 | -10.00 | -7.16  | -4.80  | -6.68  | 17.46  | -1.77  | 2.94   | -1.59  | -10.85 | -6.95  | -10.02 |
| -15.29 | -13.51 | -19.81 | -26.72 | -16.57 | -14.22 | -15.01 | -10.52 | -16.23 | -14.21 | -19.22 | -25.36 | -19.73 | -12.01 | 1.61    | -9.70  | -21.91 | -11.74 | -11.30 | -7.72  | -4.76  | 16.84  | -1.07  | -1.37  | -1.43  | -15.32 | -12.27 | -10.01 |
| -26.29 | -21.88 | -28.05 | -38.77 | -24.87 | -22.26 | -22.08 | -17.21 | -25.08 | -18.23 | -30.47 | -39.28 | -30.83 | -19.47 | 1.33    | -16.07 | -33.02 | -12.97 | -16.98 | -12.36 | -5.44  | 11.06  | -3.87  | -5.30  | -1.88  | -19.84 | -20.87 | -15.11 |
| -1.74  | -1.88  | -0.32  | -0.78  | -0.14  | -0.81  | -3.34  | -1.96  | -0.74  | -1.47  | -2.06  | -2.34  | -0.58  | -1.59  | -3.25   | -0.76  | 0.00   | 4.26   | 13.22  | 0.38   | -4.60  | -7.63  | -5.44  | 4.17   | -2.64  | 6.46   | 16.70  | 2.45   |
| -2.32  | -3.13  | -0.12  | -0.46  | 1.91   | -1.21  | -3.54  | -2.73  | 0.59   | -0.57  | 0.44   | -0.99  | -0.47  | -2.19  | -4.35   | -1.33  | -2.27  | 3.13   | 13.63  | -2.30  | -6.72  | -13.80 | -10.83 | 1.74   | -5.81  | 5.40   | 18.56  | 1.27   |
| 11.73  | 12.93  | 6.36   | 5.51   | 5.39   | 6.61   | 3.21   | 6.79   | 6.19   | 3.57   | 5.05   | 7.59   | 6.51   | 5.38   | 3.19    | 5.30   | 3.85   | -29.79 | -35.13 | -27.14 | -31.59 | -41.65 | -27.36 | -28.71 | -35.41 | -35.91 | -37.78 | -35.99 |
| -3.49  | -4.28  | 3.08   | 3.73   | 8.06   | 4.35   | 4.17   | 4.86   | 4.01   | 4.27   | 1.48   | 4.99   | 1.86   | 3.80   | 0.77    | 5.08   | 1.29   | 3.07   | 8.56   | 5.24   | 3.28   | 0.94   | 3.79   | 6.73   | 2.28   | 2.90   | 7.77   | 2.54   |
| -7.10  | -14.65 | 26.74  | 29.74  | 32.39  | 22.46  | 24.23  | 25.17  | 28.04  | 24.09  | 26.19  | 26.49  | 31.17  | 26.81  | 28.35   | 30.46  | 30.14  | 57.12  | 65.34  | 64.91  | 56.82  | 68.58  | 69.26  | 71.28  | 62.21  | 61.74  | 78.81  | 65.76  |
| 4.59   | 2.03   | 1.88   | 0.87   | -0.15  | 1.72   | 0.42   | 0.59   | 1.32   | 2.37   | 2.29   | 0.21   | 2.47   | 1.90   | 1.04    | 1.31   | 0.67   | 1.23   | -0.34  | -2.62  | 4.62   | -8.81  | -1.85  | -2.27  | 1.43   | 3.07   | -0.72  | -4.82  |
| 4.27   | 3.52   | -0.86  | -1.33  | 0.25   | 1.08   | 1.09   | 0.19   | 1.80   | 2.98   | 1.42   | 0.19   | 1.93   | 2.14   | 2.74    | 0.75   | 2.22   | -6.53  | -7.50  | -6.46  | -6.85  | -5.80  | -12.66 | -7.50  | -6.97  | -8.94  | -9.42  | -12.10 |
| 4.60   | 4.57   | -0.45  | -0.25  | 1.30   | 0.52   | 1.39   | 0.51   | 2.37   | 2.10   | 0.22   | 0.44   | 0.67   | -0.26  | 0.44    | 0.36   | 0.14   | -10.70 | -10.04 | -10.56 | -7.88  | -9.06  | -12.17 | -10.34 | -10.54 | -12.83 | -12.80 | -12.73 |
| 2.06   | 1.63   | 0.95   | 0.67   | 2.23   | 0.52   | 0.34   | 0.96   | 2.18   | 1.22   | 0.09   | 0.90   | 0.57   | 0.59   | 3.38    | 1.24   | 1.12   | -5.35  | -4.50  | -4.50  | -2.48  | -4.14  | -5.05  | -4.98  | -2.43  | -6.03  | -4.66  | -5.46  |
| -13.91 | -11.57 | -1.88  | 1.92   | 3.37   | -1.24  | -1.74  | 0.18   | -0.46  | -1.08  | -0.69  | -0.34  | 0.41   | -1.78  | -2.37   | 1.29   | 0.03   | 3.88   | 5.82   | 5.04   | 9.32   | 11.85  | 9.90   | 8.26   | 7.87   | 5.96   | 6.00   | 11.11  |
| -25.92 | -23.28 | -1.99  | 0.35   | 3.50   | -1.46  | -0.88  | -1.51  | 0.99   | 0.33   | -0.49  | -1.07  | 0.65   | -2.84  | -2.68   | 0.46   | -1.23  | 8.95   | 8.78   | 9.22   | 20.00  | 23.81  | 19.15  | 16.16  | 19.55  | 15.49  | 6.72   | 23.22  |
| 6.99   | 10.28  | 1.11   | 1.66   | 3.12   | 1.89   | 1.69   | 1.77   | 2.72   | 2.38   | 1.46   | 1.71   | 0.76   | 1.25   | 0.73    | 0.89   | 1.26   | -4.70  | -2.80  | -0.97  | -14.45 | -16.68 | -12.04 | -4.79  | -15.12 | -5.25  | 0.93   | -11.54 |
| 2.46   | 1.37   | 2.00   | 0.84   | 1.01   | 1.08   | 1.26   | 2.92   | 1.56   | 1.12   | -1.09  | 0.27   | 0.23   | 0.17   | 3.20    | 0.98   | 0.00   | 0.94   | 3.06   | 2.15   | 2.05   | 3.86   | 3.67   | 0.90   | 1.25   | -0.70  | 1.70   | 0.97   |
| 0.04   | 2.20   | 1.97   | -1.48  | 1.58   | 0.11   | 0.68   | 1.23   | 0.86   | 0.90   | -0.66  | -0.76  | -0.34  | 0.39   | -0.51   | 0.11   | -0.69  | -0.10  | 5.87   | -0.08  | -0.61  | 6.49   | 0.39   | 0.57   | -0.93  | 0.10   | 3.07   | 1.29   |
| -1.49  | -2.83  | 0.11   | -4.35  | -2.18  | -4.58  | -3.45  | -1.93  | -3.72  | -2.70  | -3.49  | -5.24  | -1.38  | -1.43  | -2.69   | -2.99  | -3.89  | -1.95  | 3.55   | -5.90  | -5.37  | 3.25   | -4.83  | -5.62  | -5.08  | -5.02  | -5.03  | -3.36  |
| -4.97  | -7.66  | -1.60  | -2.85  | 0.23   | -2.85  | -2.31  | -1.42  | -1.88  | -2.45  | -4.61  | -2.95  | -2.98  | -3.01  | -6.10   | -2.92  | -2.78  | 18.93  | 33.68  | 17.04  | 5.03   | 3.77   | 5.29   | 16.07  | 1.21   | 19.82  | 36.83  | 20.78  |
| -6.85  | -9.18  | -3.25  | -3.79  | -0.23  | -3.28  | -4.92  | -2.98  | -4.39  | -2.61  | -4.64  | -4.29  | -4.79  | -3.67  | -9.23   | -3.70  | -4.95  | 20.39  | 30.31  | 13.46  | 5.34   | 0.74   | 0.39   | 17.36  | 2.29   | 20.37  | 31.77  | 18.83  |
| 6.04   | 6.67   | 4.69   | 2.95   | 3.77   | 3.36   | 3.96   | 6.06   | 7.10   | 4.78   | 5.38   | 5.13   | 5.60   | 4.26   | 2.84    | 4.88   | 4.60   | -17.05 | -17.07 | -12.16 | -18.37 | -19.64 | -14.09 | -14.80 | -17.61 | -17.59 | -17.20 | -17.74 |
| -1.81  | -2.64  | 0.58   | 1.11   | 2.92   | 1.91   | -1.62  | 1.54   | 1.54   | 1.06   | -0.54  | 1.25   | -0.46  | -1.14  | -2.28   | 0.34   | 0.53   | -0.94  | -0.81  | -1.09  | -1.15  | 2.23   | -0.42  | -1.15  | 0.25   | -3.90  | -0.19  | 0.62   |
| -1.17  | -0.54  | 1.01   | 0.24   | 3.44   | 3.17   | 2.52   | 3.75   | 1.98   | 3.59   | 1.30   | 1.52   | 1.91   | 1.49   | 0.53    | 0.64   | 1.54   | -5.60  | -6.05  | -3.83  | -2.77  | -3.25  | -3.10  | -2.83  | -4.94  | -8.00  | -5.57  | -4.54  |
| -1.90  | 0.12   | 0.49   | 0.07   | 1.54   | 0.61   | 1.68   | 3.21   | 3.55   | 1.52   | 2.91   | 1.06   | 1.25   | -1.21  | 1.30    | 0.96   | 1.50   | 2.59   | 3.09   | 4.18   | 2.27   | 1.00   | 4.16   | 5.27   | 3.13   | 5.71   | 3.93   | 3.66   |
| -3.92  | -7.03  | 7.10   | 8.32   | 11.37  | 8.03   | 7.30   | 11.03  | 7.93   | 8.67   | 7.48   | 9.17   | 9.08   | 7.47   | 4.91    | 10.31  | 7.28   | 25.30  | 30.86  | 29.43  | 27.20  | 24.34  | 32.64  | 28.74  | 30.35  | 27.10  | 39.37  | 25.88  |
| -6.50  | -9.56  | 18.35  | 17.95  | 25.39  | 21.65  | 13.90  | 17.81  | 18.07  | 19.92  | 19.91  | 20.90  | 23.05  | 21.23  | 15.75   | 22.95  | 20.96  | 83.18  | 82.14  | 92.41  | 89.95  | 89.45  | 100.23 | 87.62  | 90.57  | 88.94  | 94.82  | 89.18  |
| 11.50  | 12.30  | -7.66  | -11.21 | -11.68 | -7.33  | -12.63 | -8.72  | -8.46  | -6.09  | -5.67  | -9.23  | -9.41  | -10.67 | -13.95  | -13.29 | -9.08  | -25.51 | -30.31 | -36.04 | -38.71 | -57.00 | -52.70 | -25.89 | -46.38 | -35.38 | -35.09 | -38.54 |
| -4.12  | -10.64 | -17.04 | -19.04 | -12.03 | -9.88  | -12.02 | -8.64  | -10.05 | -6.12  | -9.73  | -15.79 | -9.19  | -11.14 | -7.61   | -4.53  | -11.04 | -11.72 | -9.11  | -3.30  | -4.08  | -4.84  | -12.65 | -7.34  | -8.21  | -6.30  | -9.74  | -12.58 |
| -8.56  | -13.82 | -24.10 | -26.69 | -18.92 | -15.81 | -12.26 | -12.25 | -16.97 | -9.36  | -14.53 | -19.77 | -15.50 | -14.31 | -6.18   | -5.28  | -16.66 | -14.23 | -16.13 | -5.85  | -1.16  | -3.05  | -11.16 | -6.24  | -8.12  | -8.34  | -13.38 | -13.12 |
| -13.29 | -21.28 | -34.39 | -35.46 | -26.76 | -20.51 | -16.52 | -20.22 | -25.28 | -12.46 | -23.09 | -30.00 | -24.44 | -24.47 | -6.64   | -8.77  | -23.34 | -18.32 | -24.99 | -9.06  | 0.54   | -3.57  | -16.00 | -8.60  | -11.29 | -12.04 | -22.77 | -14.83 |
| -1.91  | -5.33  | -3.13  | -2.78  | -1.03  | -2.43  | -2.03  | -0.74  | -1.64  | -1.31  | -2.49  | -3.80  | 0.41   | 0.07   | -3.16   | 0.56   | -1.05  | 20.86  | 33.69  | 20.35  | 6.08   | 2.48   | 9.66   | 17.12  | 6.39   | 29.19  | 41.46  | 28.87  |
| -2.64  | -4.57  | -2.21  | -3.48  | -1.41  | -1.33  | -3.50  | -1.58  | -1.94  | -1.48  | -1.11  | -1.94  | -0.85  | -1.03  | -2.55</ |        |        |        |        |        |        |        |        |        |        |        |        |        |

| 81              | 82              | 83              | 84              | 85              | 86         | 87         | 88         | 89         | 90         | 91         | 92         | 93         | 94         | 95    | 96    | 97    | 98    | 99    | 100   | 101   | 102   | 103   | 104    | 105    | 106    | 107    | 108    |
|-----------------|-----------------|-----------------|-----------------|-----------------|------------|------------|------------|------------|------------|------------|------------|------------|------------|-------|-------|-------|-------|-------|-------|-------|-------|-------|--------|--------|--------|--------|--------|
| S. epider m. 12 | S. epider m. 13 | S. epider m. 14 | S. epider m. 15 | S. epider m. 16 | S. scuri 1 | S. scuri 2 | S. scuri 3 | S. scuri 4 | S. scuri 5 | S. scuri 6 | S. scuri 7 | S. scuri 8 | S. scuri 9 | VRE 1 | VRE 2 | VRE 3 | VRE 4 | VRE 5 | VRE 6 | VRE 7 | VRE 8 | VRE 9 | VRE 10 | VRE 11 | VRE 12 | VRE 13 | VRE 14 |
| -0.42           | 1.36            | -0.74           | 0.46            | -0.41           | -1.08      | 0.31       | -0.08      | 0.39       | 0.23       | 0.27       | 0.95       | 0.44       | 0.24       | -0.96 | 1.86  | -0.54 | -0.14 | -0.08 | -0.26 | -0.20 | 0.05  | -0.53 | 0.83   | 0.75   | 0.17   | 0.84   | 1.61   |
| 0.21            | 0.12            | 0.17            | -0.01           | -0.03           | 0.60       | 0.10       | 0.04       | 0.54       | 0.30       | 0.43       | -0.85      | -0.64      | -0.01      | 0.51  | 0.62  | 0.09  | 0.31  | 0.46  | 0.27  | 0.65  | 0.62  | 1.07  | 0.01   | -0.56  | -0.39  | -0.46  | -0.20  |
| 2.78            | 0.28            | -1.54           | 0.71            | -0.10           | -0.68      | 0.63       | 0.06       | -0.25      | -0.82      | 0.27       | 0.02       | -0.77      | 0.15       | 0.45  | -0.60 | -0.07 | -0.05 | 0.84  | 1.00  | -0.41 | -0.12 | -0.67 | 0.55   | 0.37   | 0.45   | 2.21   | 1.24   |
| -0.78           | -0.47           | -1.69           | -1.02           | 0.20            | 0.71       | 0.68       | 0.09       | -0.81      | 1.10       | 0.11       | 1.47       | -0.14      | 0.30       | 0.95  | 2.35  | 0.93  | 0.59  | -0.24 | -0.74 | 0.38  | 0.24  | -0.97 | 0.52   | 0.31   | -0.51  | 1.30   | 0.94   |
| -0.28           | -0.01           | -0.40           | 0.12            | -0.36           | -0.30      | 0.01       | 0.10       | 0.25       | -0.05      | 0.46       | -0.93      | 0.12       | -0.23      | 0.52  | -0.30 | 1.03  | -0.06 | 0.43  | -0.05 | 0.94  | 0.68  | 0.43  | 0.40   | 0.38   | 1.28   | -0.25  | 0.00   |
| -0.52           | -0.68           | -1.46           | -0.64           | 0.40            | 0.30       | -1.35      | 1.57       | 0.08       | 0.75       | -0.23      | 0.10       | 0.44       | -0.37      | 2.39  | 0.41  | 1.09  | 0.69  | -0.13 | -0.06 | -1.44 | -0.78 | 0.85  | 1.02   | -0.79  | 0.81   | -0.99  | 0.69   |
| 0.18            | -0.06           | -0.37           | -0.88           | -1.50           | 0.57       | 0.24       | -0.06      | 0.03       | 0.22       | 0.19       | 0.18       | 0.12       | 0.34       | 0.01  | 0.57  | -1.33 | 0.62  | -0.07 | 0.11  | 1.18  | 0.77  | 0.21  | -0.34  | -0.09  | 1.11   | -0.94  | -1.40  |
| 0.69            | 1.13            | -0.24           | 0.71            | 0.68            | -0.07      | 0.70       | 0.85       | 0.18       | -0.06      | 0.83       | 0.21       | -0.15      | 0.17       | 0.34  | 0.67  | 1.34  | 0.35  | 0.10  | 0.34  | 0.26  | 0.27  | 0.77  | -0.22  | 0.95   | 1.01   | 1.31   | -0.12  |
| 3.06            | 2.28            | 1.38            | -0.30           | 1.97            | 1.27       | 0.59       | 1.22       | -0.67      | -0.16      | 1.08       | 0.19       | 0.87       | -1.17      | 1.59  | -0.14 | 0.40  | 0.66  | 0.88  | -0.22 | 0.86  | 1.57  | -0.74 | -0.72  | 0.98   | -0.21  | 0.33   | 2.18   |
| 0.66            | -2.09           | -2.21           | 0.33            | -0.43           | 0.50       | -1.06      | 0.68       | 1.30       | 0.96       | 0.43       | 1.14       | 0.97       | -0.11      | -0.84 | -1.13 | 0.01  | 1.39  | -1.90 | -1.76 | 0.88  | -1.81 | -1.04 | 1.65   | -0.73  | 0.14   | -0.50  | 1.02   |
| -4.15           | -7.94           | -3.11           | -0.97           | -0.85           | 0.13       | -1.72      | 1.68       | 1.70       | 0.26       | 1.51       | 1.57       | 1.00       | -0.31      | -0.49 | 0.76  | -1.48 | 3.26  | -6.86 | -0.57 | -1.02 | -1.23 | -1.12 | 1.43   | -0.45  | -1.98  | -1.37  | -0.87  |
| -1.49           | -3.93           | -0.45           | -0.65           | -1.29           | -0.39      | -1.70      | -0.12      | -0.12      | -0.12      | 0.60       | 1.33       | -0.78      | 0.19       | 0.94  | 2.23  | 1.23  | 4.00  | -1.05 | 1.43  | 2.55  | 1.86  | -0.54 | -1.78  | -1.06  | -0.32  | -2.87  | -0.93  |
| -8.63           | -6.97           | -6.73           | -5.23           | -6.15           | 0.04       | 0.44       | 0.77       | 0.99       | 0.92       | 0.70       | 0.29       | -0.23      | 0.70       | 1.01  | 0.43  | 0.54  | -1.53 | -2.72 | -0.56 | 0.86  | -1.21 | 1.31  | 0.25   | 0.58   | -1.53  | -3.30  | -0.96  |
| -3.84           | -0.51           | -3.55           | -5.58           | -1.14           | -0.74      | -0.61      | -0.83      | -0.01      | -0.12      | 0.00       | -0.72      | -0.62      | -0.13      | 0.28  | -0.57 | 0.11  | -0.72 | -1.87 | 1.02  | 0.09  | -1.13 | -1.69 | 1.37   | -1.77  | -2.99  | -1.94  | -1.32  |
| 0.06            | 0.95            | 0.59            | -1.67           | 0.66            | -0.58      | 0.69       | -0.32      | 0.38       | 0.83       | -0.24      | 1.21       | 0.26       | -0.08      | 0.31  | -1.18 | -0.66 | 0.19  | 0.19  | 1.56  | -0.18 | -0.11 | 0.02  | -0.81  | 1.03   | 0.57   | -0.41  | 0.15   |
| 0.90            | 0.66            | 0.62            | 0.72            | -0.23           | 1.13       | 2.04       | 0.30       | 1.43       | 0.58       | 0.03       | 0.26       | 0.28       | 0.64       | -0.84 | 1.34  | 1.03  | 1.16  | 0.16  | 0.51  | 1.52  | 1.21  | 0.99  | 0.85   | 1.43   | 0.06   | -0.18  | -0.21  |
| -0.72           | -0.91           | -0.53           | -0.23           | -0.70           | -0.53      | -0.74      | 0.23       | -1.12      | 0.01       | -0.60      | 0.15       | -0.47      | -0.99      | -0.13 | -0.10 | 0.67  | -0.22 | 0.53  | -0.19 | -0.48 | -0.39 | -0.38 | 0.14   | -0.66  | 0.70   | -0.33  | -0.22  |
| 0.15            | 0.11            | 0.07            | -0.80           | 1.49            | 1.71       | 0.86       | 0.17       | -0.32      | 0.79       | 1.41       | 0.09       | 0.86       | -0.08      | 1.90  | 0.62  | 0.65  | 0.63  | -0.53 | 0.91  | 0.38  | 1.42  | 1.74  | 1.09   | 1.45   | 0.41   | 1.40   | 1.05   |
| -0.87           | 0.11            | -1.68           | -1.08           | -0.17           | 0.43       | -0.47      | -1.49      | 0.39       | -0.55      | -1.49      | -0.29      | -0.40      | -0.32      | -0.53 | 0.19  | -0.32 | -0.96 | -0.71 | -0.53 | -0.56 | -0.04 | -1.23 | -0.99  | -0.74  | -1.12  | -0.43  | -0.67  |
| 0.14            | -0.32           | -1.01           | -1.34           | -0.19           | 0.35       | -0.58      | 0.13       | -0.19      | -0.27      | -0.30      | 0.58       | -0.70      | -0.48      | -0.16 | 0.71  | -0.47 | -0.66 | -1.18 | -0.12 | -0.74 | -0.28 | -1.15 | -1.26  | -0.06  | -0.26  | -0.90  | -0.54  |
| 1.04            | 0.21            | -1.35           | 1.47            | 0.59            | 0.49       | 0.07       | -0.46      | 0.07       | -0.38      | -0.24      | -0.30      | 1.15       | 0.33       | -0.02 | -0.77 | -1.04 | -0.17 | -0.34 | 0.75  | -0.43 | 0.41  | -0.63 | 1.57   | 0.57   | 1.51   | 0.59   | 1.64   |
| -0.41           | 1.92            | 0.83            | 0.37            | 0.25            | 0.05       | 0.29       | 1.74       | 0.96       | -0.29      | -0.25      | 1.65       | 0.16       | 0.12       | 0.60  | 2.21  | 1.67  | -0.35 | -0.66 | 0.33  | -0.07 | 2.38  | 0.42  | 1.89   | 0.93   | 0.79   | 0.32   | 0.50   |
| 1.37            | 0.60            | 1.63            | 0.17            | 1.83            | 0.74       | -0.09      | 0.19       | 1.08       | -0.01      | 0.19       | 0.00       | 0.57       | 0.58       | 0.78  | 0.39  | 0.59  | 1.30  | 0.12  | 0.97  | 1.28  | 0.29  | 0.56  | 0.68   | 0.36   | 0.97   | 1.36   | 1.13   |
| 0.23            | 0.24            | 1.00            | 1.25            | -0.74           | -0.46      | 0.92       | 0.39       | -0.77      | 0.40       | 0.19       | 0.05       | 0.51       | 0.70       | 0.66  | 0.86  | 1.97  | 0.45  | -0.21 | 0.08  | 0.03  | 0.16  | 0.83  | -0.55  | -0.06  | -1.19  | 0.38   | 0.23   |
| -0.84           | -2.43           | -3.15           | 0.32            | -1.33           | 1.28       | 0.53       | 0.23       | 0.60       | 0.65       | 0.43       | -0.28      | 0.12       | 0.36       | -1.06 | 1.07  | 0.57  | 0.11  | 0.98  | 0.64  | 0.97  | 0.99  | 1.30  | 1.35   | -0.41  | 0.74   | -1.00  | -1.01  |
| -1.81           | -8.27           | -6.14           | -2.31           | -1.96           | 0.18       | 0.92       | -0.28      | 0.94       | 0.50       | 0.05       | 0.41       | 0.79       | 0.66       | 0.84  | 1.97  | 0.26  | 0.34  | -0.72 | 0.93  | 0.31  | 1.19  | 1.97  | 0.27   | 0.83   | -0.53  | -0.70  | -0.35  |
| -1.32           | -3.32           | -2.01           | -1.17           | -2.40           | -0.03      | -1.13      | 0.25       | -0.63      | -0.43      | -0.15      | -0.53      | -0.40      | 0.15       | -0.19 | 0.02  | 0.20  | -0.19 | -0.54 | 0.40  | 1.03  | -0.29 | 0.42  | 0.01   | -2.57  | 0.63   | -1.13  | -0.04  |
| -1.98           | -3.06           | -3.02           | -1.40           | -0.99           | 0.68       | 0.27       | 0.60       | 1.26       | -0.14      | -0.10      | 0.13       | -0.53      | -0.08      | 0.18  | 1.36  | 0.24  | 0.25  | -0.28 | -0.41 | 1.21  | 0.51  | 0.72  | -0.41  | 0.82   | 0.52   | 0.23   | 0.39   |
| -2.56           | -3.45           | -3.32           | -0.50           | -2.54           | 0.39       | 0.21       | 0.42       | 0.88       | 0.24       | 0.48       | 1.31       | 0.24       | -0.38      | 0.78  | 0.20  | 0.97  | 0.42  | 0.46  | 0.12  | 0.44  | 0.70  | 1.16  | 1.05   | 1.02   | 1.19   | 0.25   | -0.26  |
| 0.43            | -3.08           | -3.44           | -2.38           | -1.38           | 0.45       | 0.53       | 0.65       | -0.31      | 1.05       | -3.07      | -0.72      | -0.85      | 0.85       | 1.86  | 0.14  | 0.12  | 0.03  | 0.30  | 0.96  | 0.28  | 0.71  | 1.19  | -0.14  | 1.05   | 1.28   | -0.34  | -1.60  |
| 1.27            | 1.57            | -1.41           | 1.46            | -0.33           | 0.21       | 0.11       | 1.29       | 0.24       | 0.08       | -0.04      | 0.12       | -1.22      | -0.59      | 0.60  | 0.48  | 0.27  | -0.10 | -1.10 | 1.21  | -0.29 | -0.55 | 0.22  | 0.94   | 1.38   | 0.51   | 0.59   | -0.51  |
| -0.44           | -1.16           | -0.06           | 0.05            | -0.09           | -0.86      | 0.19       | -0.43      | -0.29      | -0.31      | -0.29      | -0.47      | 0.39       | -0.52      | -0.21 | -1.43 | 0.13  | 0.52  | -1.16 | -0.67 | 0.48  | 0.81  | -0.32 | 0.36   | -0.02  | 0.41   | 0.57   | 0.18   |
| 0.42            | 1.36            | 0.59            | -0.12           | -0.15           | 1.22       | 0.33       | 0.84       | -1.01      | -0.25      | -0.29      | -0.13      | -0.46      | 0.54       | 0.48  | 0.13  | 0.52  | 0.54  | -0.63 | 0.23  | 0.12  | -0.47 | 0.70  | 0.54   | 0.47   | 0.29   | -0.85  | 0.78   |
| -0.98           | 1.13            | -0.01           | 0.60            | -1.37           | -0.18      | 0.21       | 0.41       | -0.02      | -0.07      | 0.76       | 0.10       | 0.39       | -0.54      | -0.39 | 1.00  | 0.61  | -0.51 | 0.33  | -0.90 | 0.92  | 0.25  | -4.24 | -5.71  | -4.60  | -2.54  | -1.54  | -2.67  |
| 0.48            | 0.60            | 0.80            | 0.69            | 1.46            | 0.28       | 0.28       | 0.53       | 0.63       | -0.03      | 0.73       | -0.73      | -0.27      | 0.23       | 0.88  | 1.14  | 0.43  | 0.40  | 0.08  | 1.61  | 0.05  | 0.07  | 0.69  | 0.21   | 1.13   | 0.94   | 0.03   | -0.81  |
| 1.71            | 0.36            | 0.18            | 0.73            | 0.36            | -0.04      | 0.28       | 0.35       | 0.74       | -1.30      | 0.07       | 0.91       | -0.03      | -0.08      | 1.46  | 1.88  | 1.08  | 0.81  | 0.90  | 0.95  | 0.81  | 1.27  | 2.03  | 2.12   | 0.61   | 0.01   | 2.95   | -0.63  |
| 0.43            | 1.11            | 0.21            | -0.08           | -0.19           | -0.34      | 0.18       | 0.77       | -0.01      | 0.53       | 1.71       | 0.81       | 0.66       | 0.21       | 0.37  | 1.01  | 0.51  | 0.88  | 0.50  | 0.28  | 0.99  | -0.12 | -0.98 | 0.57   | 0.38   | -0.80  | 0.46   | 0.99   |
| -0.27           | 0.14            | 0.35            | 0.63            | 0.62            | 0.67       | 0.18       | -1.12      | 0.87       | -0.09      | -0.14      | -0.04      | 0.15       | 0.29       | 0.51  | 0.50  | 0.60  | 0.80  | 0.89  | 0.63  | 0.16  | 1.14  | 1.02  | -0.01  | 0.94   | 1.12   | 0.63   | 0.12   |
| 0.50            | 1.51            | 0.46            | 0.69            | 0.98            | 0.18       | 0.53       | 1.10       | -1.34      | 1.05       | 1.56       | 0.28       | 0.03       | 0.21       | 0.52  | -0.96 | 0.30  | 0.72  | -1.28 | -0.04 | -0.27 | -1.60 | 0.03  | 0.10   | 0.11   | -0.16  | 0.24   | 1.21   |
| -0.22           | -0.33           | -1.58           | -1.07           | -0.10           | 0.70       | -0.33      | 0.03       | 1.53       | 0.49       | -0.12      | -0.68      | -0.05      | -0.86      | -0.64 | 0.86  | 0.64  | 0.86  | 0.74  | -0.70 | 1.20  | 0.59  | 0.90  | -1.42  | 0.66   | 1.51   | -0.98  | 0.81   |
| -0.26           | 0.92            | -0.46           | -1.00           | -0.28           | 0.36       | 0.11       | 0.10       | -0.89      | 0.18       | -0.77      | 0.61       | -0.40      | -0.01      | 1.72  | -0.57 | 1.05  | 0.45  | 0.17  | -0.05 | 0.61  | 0.79  | -0.41 | -0.13  | -0.28  | 0.46   | -0.38  | -0.32  |
| 1.76            | 2.77            | -0.94           | 0.45            | 0.37            | 1.07       | 0.39       | -0.36      | 0.36       | 0.10       | 1.42       | -0.19      | 0.76       | -1.09      | 0.03  | 0.60  | 0.34  | -0.44 | 1.43  | 0.19  | 0.58  | 0.66  | 1.08  | 0.47   | -0.84  | -0.86  | 1.15   | 1.35   |
| -1.27           | 1.42            | 0.14            | -0.99           | 0.81            | 0.36       | -0.16      | -0.40      | 0.77       | -1.22      | -0.02      | 0.03       | 0.44       | -0.63      | 0.38  | 0.75  | 2.39  | 0.94  | 1.57  | 0.08  | 1.22  | 0.66  | 0.37  | 0.75   | -0.71  | -0.09  | 0.43   | 0.41   |
| 1.25            | 1.34            | 0.05            | 0.32            | -0.26           | 0.01       | 0.06       | 0.68       | 0.47       | 0.54       | -0.14      | 0.25       | 0.26       | -0.19      | 0.08  | 0.29  | -0.10 | 0.88  | -0.17 | 0.61  | 0.57  | 0.80  | 0.06  | -0.53  | 0.08   | 0.77   | -0.33  | 0.23   |
| -1.00           | -0.12           | -0.26           | -0.55           | -0.46           | 1.17       | 0.77       | -0.26      | 0.61       | -1.11      | 0.02       | 1.07       | 0.22       | 0.22       | -0.21 | -0.18 | 0.72  | 0.00  | -0.69 | -0.90 | -0.82 | 0.64  | 0.04  | 1.01   | 0.67   | -0.90  | -0.46  | -0.40  |
| -0.74           | -3.01           | -0.85           | -0.87           | -2.34           | 1.17       | -1.00      | 0.13       | 0.48       | -0.99      | -0.07      | -0.60      | 0.81       | -0.13      | 0.15  | 0.23  | -0.03 | -1.26 | 0.66  | 0.31  | 0.40  | -0.22 | 0.99  | 0.53   | 0.79   | 0.36   | 0.34   | -0.36  |
| -0.95           | -1.80           | -1.             |                 |                 |            |            |            |            |            |            |            |            |            |       |       |       |       |       |       |       |       |       |        |        |        |        |        |

|        |        |        |       |       |       |       |       |       |       |       |       |       |       |       |       |       |       |       |       |       |       |       |       |       |       |       |       |
|--------|--------|--------|-------|-------|-------|-------|-------|-------|-------|-------|-------|-------|-------|-------|-------|-------|-------|-------|-------|-------|-------|-------|-------|-------|-------|-------|-------|
| 0.80   | -0.34  | -0.33  | 0.26  | 0.58  | -0.17 | -0.32 | 0.60  | -0.34 | -0.70 | -0.47 | -1.06 | -0.37 | -0.14 | -1.42 | 0.94  | 0.63  | -0.95 | -0.36 | 1.05  | 1.97  | 0.58  | -3.44 | -2.61 | -1.83 | -1.52 | -3.19 | -1.02 |
| -0.07  | -0.31  | -0.05  | 0.59  | -0.43 | -0.50 | 0.10  | 0.40  | 0.23  | -0.53 | -0.01 | 0.83  | -0.20 | -0.53 | 1.10  | 0.34  | 0.42  | -0.67 | 0.23  | -0.42 | -0.25 | -0.21 | 0.23  | 0.04  | 0.28  | 0.82  | 0.74  | -0.35 |
| 1.05   | 0.31   | -0.91  | -0.41 | 0.37  | -0.03 | -0.43 | -0.45 | 0.26  | 0.96  | -0.40 | -0.51 | 0.19  | -0.54 | -1.50 | 0.63  | 0.63  | -1.58 | -0.77 | 1.82  | -1.14 | 1.04  | 0.44  | 2.70  | 0.64  | 1.03  | 2.70  | 1.57  |
| -0.59  | 3.47   | 2.07   | 1.04  | 1.48  | -0.60 | 0.22  | 0.48  | 0.15  | -1.43 | 0.30  | -0.66 | 0.26  | -0.34 | 0.60  | 1.17  | 0.82  | 0.72  | 0.79  | -0.71 | 0.80  | 0.43  | -0.55 | 0.60  | 0.17  | 0.01  | 0.32  | 0.94  |
| 1.13   | 0.64   | -0.54  | 0.48  | 0.63  | 0.12  | -0.05 | -0.14 | -0.26 | 0.64  | 0.25  | -0.19 | -0.67 | -1.29 | -0.26 | 0.66  | -0.21 | 0.12  | 0.62  | 1.35  | 0.25  | 0.15  | 0.98  | 0.68  | -0.07 | -0.02 | 0.33  | 0.02  |
| 3.70   | 2.49   | 0.92   | 1.29  | -0.14 | -0.09 | 0.12  | -0.09 | -0.46 | -0.13 | 0.41  | 0.08  | -1.34 | 0.57  | 1.60  | -0.89 | 1.23  | 0.61  | 1.05  | 1.01  | 0.20  | 0.31  | -0.18 | 0.86  | 0.95  | 0.95  | 1.67  | 2.33  |
| -0.73  | -0.48  | -2.21  | -0.83 | -0.55 | 0.03  | -0.01 | -0.03 | -0.52 | -0.58 | 1.52  | -0.03 | -0.68 | -1.02 | 1.85  | 2.54  | 0.58  | 0.68  | -1.58 | -0.81 | 0.43  | 0.02  | -0.67 | 0.62  | 0.52  | -0.60 | -0.99 | 0.74  |
| -1.58  | 0.04   | 0.51   | -0.27 | -0.23 | -0.91 | 0.27  | 0.60  | -0.63 | 0.29  | -0.04 | 0.04  | -0.04 | -0.64 | 1.30  | 0.17  | 0.85  | 0.65  | 0.65  | 0.38  | 0.79  | 1.25  | 0.58  | 1.30  | 0.81  | 1.85  | -0.52 | -0.25 |
| -0.48  | -1.53  | -1.31  | -0.57 | -0.62 | -0.26 | -1.24 | -0.13 | -0.32 | 0.05  | -0.04 | -0.66 | 0.42  | -0.39 | 0.95  | -0.03 | 1.25  | 1.99  | 0.50  | 0.01  | 0.66  | -0.61 | 1.56  | -0.05 | 0.86  | -0.48 | 0.15  | 0.83  |
| -0.59  | 0.63   | -0.75  | -0.74 | -0.40 | 0.14  | 0.11  | -1.20 | 0.36  | -0.79 | 1.86  | -0.25 | -1.17 | -0.01 | 0.04  | -0.24 | 0.18  | 0.75  | -0.14 | 0.35  | 1.17  | 1.35  | -0.43 | 0.18  | 0.08  | 1.87  | -0.81 | 0.36  |
| 1.12   | 2.61   | 1.12   | 1.14  | 1.41  | -0.04 | 0.22  | 1.16  | 0.35  | 0.28  | 0.36  | -0.19 | 0.32  | -0.31 | 0.81  | 0.87  | 1.25  | 1.34  | 0.52  | 0.46  | 0.84  | 0.22  | 0.85  | 0.08  | 1.48  | 1.23  | 1.24  | 0.48  |
| 2.75   | 3.38   | 1.49   | 1.87  | 4.08  | 0.76  | 2.30  | 2.57  | 0.48  | 0.15  | 1.25  | 2.12  | 1.05  | -0.41 | 1.45  | -0.13 | 0.68  | 0.67  | 1.72  | 0.31  | 0.06  | 2.43  | -0.86 | 0.67  | -0.04 | 0.02  | 2.76  | 2.13  |
| -0.91  | -2.49  | -1.37  | 0.72  | -0.46 | 1.46  | -1.14 | 2.15  | 2.38  | 2.73  | 0.74  | 0.99  | 1.74  | 1.08  | -1.12 | -1.34 | 0.02  | 0.88  | -3.22 | -1.66 | -3.00 | -2.65 | -0.70 | 1.20  | 1.09  | 1.25  | 0.46  | -0.21 |
| -4.81  | -12.84 | -4.51  | -4.03 | -4.61 | 2.06  | -1.54 | 4.70  | 6.20  | 3.40  | 3.30  | 3.10  | 3.93  | 2.10  | -0.63 | -1.17 | -1.81 | 0.35  | -0.26 | 1.19  | -0.65 | -1.73 | -2.77 | 2.25  | 0.10  | 0.79  | -0.25 | -2.30 |
| -0.39  | -4.98  | -1.20  | -1.89 | -0.91 | -2.47 | -2.28 | -0.19 | -2.61 | -1.25 | -2.24 | -1.59 | -0.67 | -1.97 | 1.77  | 2.13  | 3.29  | 2.64  | -1.95 | 3.03  | 4.07  | 1.98  | -1.96 | -1.27 | -1.88 | 0.43  | -3.01 | -3.62 |
| -11.10 | -13.63 | -10.51 | -8.23 | -6.13 | -0.61 | -0.28 | 1.09  | -0.34 | 0.86  | 0.13  | 0.05  | -0.01 | -0.21 | 2.00  | -0.21 | 1.16  | -1.53 | -1.47 | 0.81  | 1.35  | 0.46  | 1.54  | 0.73  | 1.03  | -1.27 | -2.88 | -0.61 |
| -4.30  | -1.13  | -4.73  | -7.98 | -1.27 | -1.18 | -0.48 | -0.19 | -0.49 | -0.09 | -0.02 | 0.00  | -0.38 | 0.00  | 0.91  | -0.10 | 2.29  | -0.52 | -2.21 | 0.79  | 0.57  | -2.13 | -0.86 | 0.31  | -1.44 | -4.99 | -2.27 | -1.98 |
| 0.32   | 0.74   | 0.34   | -1.49 | 0.85  | -1.87 | 0.53  | 0.48  | 0.77  | -0.03 | 1.14  | -0.52 | -0.74 | -0.52 | 0.64  | -1.39 | -0.52 | -0.50 | 0.64  | 2.67  | -0.57 | -0.48 | -0.79 | -1.43 | 0.59  | 1.10  | -0.81 | 0.32  |
| -0.01  | 2.32   | 2.54   | 0.92  | 1.97  | 0.57  | 1.37  | 0.77  | 0.03  | 0.37  | 0.50  | -0.38 | 0.36  | 0.74  | -0.02 | 2.32  | -0.02 | 1.39  | 1.39  | 1.45  | 2.08  | 0.79  | 2.06  | 2.10  | 2.19  | 1.10  | 0.86  | 0.93  |
| -1.46  | -1.16  | -0.33  | -0.92 | -0.54 | -1.05 | -0.52 | 0.63  | -1.14 | 0.03  | -0.58 | -0.42 | -0.62 | -1.03 | 0.39  | -0.60 | -0.22 | -0.36 | 0.03  | -0.08 | -0.01 | 0.13  | -1.17 | 0.41  | -0.63 | 0.39  | 0.64  | -0.63 |
| 1.36   | 1.29   | 0.44   | 0.31  | 2.61  | 0.93  | 0.66  | -0.32 | -0.59 | 0.40  | 1.70  | -0.01 | 0.73  | -0.52 | 3.03  | 2.12  | 2.44  | 1.15  | 1.54  | 1.10  | 0.63  | 2.21  | 1.30  | 1.55  | 1.73  | 0.15  | 1.48  | 2.27  |
| -1.75  | -0.86  | -1.51  | -0.04 | 0.27  | 0.22  | 0.73  | -1.43 | -0.25 | 0.07  | -0.85 | -0.53 | -0.50 | -1.10 | -1.08 | -0.40 | -1.06 | -1.31 | -0.09 | -0.59 | -0.77 | -1.47 | -3.18 | -2.51 | -0.97 | -0.77 | -1.11 | -1.25 |
| 0.01   | -0.53  | -1.65  | -0.19 | -0.39 | -0.55 | -0.96 | -0.08 | -0.32 | -0.55 | -0.95 | -0.06 | -0.55 | -0.99 | -0.21 | 0.17  | -0.49 | -0.54 | -0.77 | -0.08 | -0.88 | -0.58 | -2.26 | -1.34 | -0.94 | -0.86 | -1.77 | -1.61 |
| 1.23   | 0.79   | 0.14   | 2.76  | 0.75  | -0.53 | 0.08  | -0.87 | -0.43 | 0.32  | -0.03 | -0.38 | 0.72  | -0.23 | -0.83 | -0.06 | -0.68 | -0.31 | -0.07 | 0.77  | -1.10 | -0.08 | -0.57 | 0.35  | 0.13  | 0.99  | 0.68  | -1.01 |
| -0.99  | 2.50   | 1.91   | 1.31  | 1.30  | 0.62  | 0.49  | 1.45  | 0.21  | 0.30  | -0.32 | 0.26  | 0.09  | -0.43 | 3.67  | 2.01  | 2.91  | 2.29  | 0.32  | 1.16  | 0.76  | 1.80  | 0.21  | 2.00  | 1.46  | 0.61  | 1.08  | 1.74  |
| 2.46   | 2.04   | 2.81   | 0.99  | 2.43  | 0.04  | 0.66  | 0.48  | 1.06  | 0.90  | 0.78  | 0.69  | 0.29  | 0.59  | 0.83  | 1.07  | 0.43  | 1.43  | 0.76  | 1.47  | 1.52  | 0.98  | 0.92  | 0.96  | 0.76  | 1.44  | 2.38  | 1.02  |
| -0.36  | -0.43  | 0.31   | 0.28  | 0.91  | 0.12  | -0.56 | 0.37  | 0.99  | 0.69  | 1.38  | 0.54  | 1.00  | 0.39  | 0.90  | 0.82  | 2.00  | 0.88  | -0.12 | 0.58  | -0.50 | -1.18 | 1.04  | -0.12 | 0.54  | -0.16 | 1.13  | 0.67  |
| -1.33  | -3.61  | -4.75  | -0.41 | -1.75 | 0.45  | 0.62  | 0.76  | 1.00  | 2.07  | 0.99  | 0.27  | 0.15  | 1.33  | 0.67  | 1.78  | 1.39  | 1.04  | 0.23  | 1.43  | 1.86  | 1.66  | 2.21  | 1.05  | 0.39  | 0.99  | -1.34 | 0.91  |
| -3.27  | -10.71 | -8.68  | -2.24 | -3.07 | 1.28  | 1.14  | 0.70  | 1.16  | 1.62  | 1.71  | 0.40  | 1.66  | 1.49  | 1.60  | 1.28  | 1.29  | 1.49  | 1.24  | 1.24  | 1.79  | 2.56  | 2.32  | 1.75  | 1.62  | 0.47  | -1.64 | -0.01 |
| -2.12  | -3.22  | -2.63  | -1.32 | -2.54 | -1.12 | -1.47 | 0.03  | -2.02 | -0.24 | 0.36  | 0.01  | -1.12 | -1.10 | 0.30  | -0.47 | 1.10  | 2.00  | -1.56 | -0.57 | 1.85  | -0.18 | -0.16 | -0.74 | -1.62 | -1.22 | -1.18 | 0.26  |
| -3.35  | -4.24  | -4.31  | -1.34 | -2.19 | 1.38  | 0.23  | 0.10  | 0.30  | -0.52 | 0.37  | 0.37  | -0.19 | -0.07 | 0.52  | -0.87 | 1.02  | 1.17  | 0.12  | -0.15 | 1.43  | 0.12  | 1.13  | 0.71  | 1.21  | 0.36  | 0.74  | 1.79  |
| -4.06  | -5.27  | -4.35  | -0.46 | -3.90 | 1.02  | 0.41  | 1.20  | 1.38  | 1.19  | 0.66  | 0.75  | 0.40  | 0.18  | 0.70  | -0.81 | 0.76  | 1.17  | 0.59  | 0.53  | 0.17  | -0.04 | 1.64  | 0.84  | 1.62  | 1.23  | 0.61  | 1.41  |
| -0.53  | -3.54  | -3.00  | -2.87 | 1.32  | -1.38 | -0.64 | 1.17  | -1.18 | 1.33  | -3.56 | -1.39 | -0.70 | -1.75 | 2.66  | 0.97  | 0.58  | 0.90  | 0.97  | 1.19  | -0.01 | -0.48 | 1.42  | -0.57 | 1.97  | 0.37  | -1.11 | 0.01  |
| -0.12  | 2.52   | -0.68  | 1.40  | 0.79  | -0.79 | -0.15 | 0.23  | -0.20 | 0.15  | -0.27 | -0.95 | -0.44 | -0.41 | 1.01  | 0.73  | 0.12  | 0.67  | -0.52 | 1.68  | -0.34 | 0.93  | -0.87 | 1.21  | -0.07 | 0.17  | 1.43  | 0.35  |
| 0.51   | -0.40  | 0.99   | 0.18  | 0.73  | -0.63 | -0.31 | -0.07 | -0.63 | -0.27 | 0.01  | -0.44 | -0.06 | -0.41 | -0.20 | -0.57 | 0.22  | 0.58  | -0.35 | -0.30 | 0.59  | 0.37  | -0.36 | 0.31  | 1.37  | -0.24 | 0.04  | 0.56  |
| 0.36   | 2.03   | 1.38   | 0.59  | 0.90  | 0.07  | -0.45 | 0.19  | -1.87 | -0.32 | 0.02  | -0.52 | -0.17 | -0.73 | -0.06 | 0.39  | 0.72  | 1.08  | -0.88 | 0.22  | 0.15  | -0.19 | 1.20  | 0.12  | 1.16  | 0.60  | 0.49  | -0.10 |
| -0.66  | 2.27   | 0.97   | 0.85  | 0.37  | -0.61 | 0.17  | 0.03  | -0.23 | -1.26 | 0.06  | -0.26 | 0.04  | -0.75 | 0.92  | 1.16  | 0.59  | -0.30 | -0.42 | -0.70 | 0.38  | -0.41 | -6.13 | -7.69 | -5.52 | -5.64 | -3.69 | -4.93 |
| 0.51   | 0.97   | 1.24   | 0.76  | 1.38  | 0.19  | 0.41  | 0.06  | -0.31 | 0.61  | 0.10  | -0.84 | -0.62 | -0.19 | 1.32  | 0.63  | 0.54  | 0.81  | 1.09  | 1.41  | 0.76  | 0.06  | 0.54  | 0.36  | 2.97  | 1.13  | 0.37  | -0.50 |
| 3.03   | 2.04   | 1.23   | 2.23  | 1.07  | -0.40 | 0.06  | 0.38  | -1.02 | -0.94 | -0.02 | -0.96 | -0.14 | -0.40 | 1.51  | 1.78  | 1.81  | 1.31  | 0.01  | 0.10  | 1.39  | 0.77  | 2.19  | 2.99  | 3.86  | 1.18  | 4.62  | 2.03  |
| 1.00   | 2.17   | 0.58   | 0.95  | 0.82  | 0.51  | 0.29  | 0.96  | -0.27 | 1.37  | 0.66  | 0.86  | 1.57  | 0.69  | 0.76  | 1.03  | 1.76  | 0.89  | 0.41  | 0.85  | 1.23  | 0.27  | 0.61  | 0.88  | 0.56  | 0.67  | 1.55  | 0.52  |
| -0.20  | 0.67   | 1.41   | 1.12  | 0.84  | 0.40  | 0.61  | 0.52  | 0.99  | -0.34 | 0.53  | 0.04  | -0.10 | 0.48  | 0.32  | 0.23  | 0.37  | 1.17  | 0.77  | 0.85  | 0.95  | 1.99  | 1.06  | 0.61  | 1.21  | 0.63  | 0.78  | 0.52  |
| 1.43   | 1.67   | 1.52   | 1.79  | 1.32  | -0.58 | 0.11  | 0.21  | 0.41  | 1.39  | 1.90  | 0.17  | -0.14 | 0.65  | 0.33  | 0.40  | 1.12  | 0.52  | 0.94  | -0.21 | 1.39  | -0.74 | -0.41 | 0.46  | 0.16  | 2.68  | 1.58  | 2.22  |
| -0.96  | -1.16  | -0.81  | -0.81 | -0.01 | -0.02 | -0.14 | -0.25 | 0.84  | 0.41  | 0.47  | 0.15  | 0.14  | -0.43 | 0.94  | -0.01 | 0.62  | 0.74  | -1.12 | -0.60 | 0.95  | 0.29  | -0.18 | -1.87 | -0.31 | 1.05  | 1.11  | -0.01 |
| 0.54   | 1.09   | 0.29   | -0.77 | 0.46  | -0.02 | -0.04 | 0.12  | -0.81 | 0.16  | -0.53 | 0.03  | -0.38 | 0.03  | 1.30  | 0.36  | 0.48  | 0.08  | 0.26  | 0.29  | 0.32  | 0.75  | -0.19 | 0.38  | 0.09  | -0.38 | -0.68 | 0.31  |
| 2.67   | 3.69   | 0.10   | 0.33  | 0.10  | -0.79 | -0.01 | -0.66 | 0.31  | -0.04 | 0.82  | 0.00  | 0.60  | -0.86 | 0.99  | -0.50 | 1.07  | 0.13  | 0.11  | 1.42  | 0.53  | 0.37  | 1.10  | -0.02 | -0.08 | 0.24  | 1.40  | 1.40  |
| -0.53  | 2.18   | 0.63   | -0.26 | 2.17  | 0.00  | -1.21 | -0.74 | 0.36  | -1.19 | -0.20 | 0.25  | -0.13 | -0.32 | 1.16  | 2.65  | 2.70  | 1.78  | 1.06  | 0.30  | 1.80  | 1.73  | 1.12  | 0.99  | 0.10  | 1.10  | 0.35  | 0.98  |
| 1.47   | 2.41   | 0.80   | 1.32  | 0.47  | 0.14  | -0.18 | 0.79  | 0.26  | 0.57  | 0.16  | 0.30  | -0.21 | 0.08  | 0.17  | -0.88 | -0.04 | 1.01  | 0.58  | 0.92  | 0.67  | 0.75  | -0.45 | -0.31 | 0.47  | 0.97  | 0.18  | 0.63  |
| -0.92  | 0.49   | 0.95   | 1.51  | 0.31  | -0.31 | -1.29 | 0.94  | 0.24  | -0.80 | -0.36 | 0.71  | 0.59  | 1.02  | 0.23  | 0.14  | 0.20  | 1.63  | -0.10 | -0.61 | -0.78 | 0.19  | 0.03  | 0.38  | 1.12  | 0.02  | -0.25 | -0.41 |
| -1     |        |        |       |       |       |       |       |       |       |       |       |       |       |       |       |       |       |       |       |       |       |       |       |       |       |       |       |

|        |        |        |       |       |       |       |       |       |       |       |       |       |       |       |       |       |       |       |       |       |       |       |       |       |       |       |       |
|--------|--------|--------|-------|-------|-------|-------|-------|-------|-------|-------|-------|-------|-------|-------|-------|-------|-------|-------|-------|-------|-------|-------|-------|-------|-------|-------|-------|
| -0.46  | 2.77   | 0.64   | 1.63  | 0.96  | -1.66 | -0.59 | -0.05 | -1.30 | 0.06  | 0.67  | -0.83 | -0.12 | -0.40 | 0.32  | 1.39  | 0.43  | 0.81  | 1.44  | 0.14  | 0.82  | 1.80  | 0.13  | 0.40  | 0.90  | 0.45  | 1.83  | 1.90  |
| 1.00   | 0.80   | 1.10   | 0.74  | 0.92  | -1.37 | 0.24  | 0.23  | -0.37 | 0.38  | 0.85  | -0.84 | -0.64 | -0.94 | -0.54 | 1.00  | 0.08  | 0.38  | 0.25  | 0.43  | 0.75  | -0.01 | 0.68  | 0.06  | -0.42 | 0.28  | -0.55 | 0.12  |
| 3.63   | 2.47   | -1.11  | 2.87  | 0.90  | -2.15 | -0.25 | 0.07  | -1.45 | -0.27 | -0.67 | -0.82 | -0.87 | -0.30 | 0.95  | -0.56 | 0.73  | 0.39  | 1.07  | 1.23  | 0.51  | 0.82  | 0.78  | 1.89  | 0.69  | 1.10  | 2.34  | 1.12  |
| -0.88  | -1.16  | -2.24  | -0.95 | 0.18  | -1.77 | -0.07 | -0.12 | -1.83 | 0.67  | 1.04  | -0.49 | -0.21 | -0.30 | 0.58  | 1.37  | 1.20  | 0.75  | -0.14 | -0.76 | 0.58  | -0.39 | -1.00 | 0.77  | -0.04 | -0.18 | -0.32 | 1.17  |
| -1.05  | -0.11  | 0.26   | 0.24  | -0.05 | -1.91 | 0.08  | 0.29  | -0.59 | 0.54  | 0.34  | -0.83 | -0.11 | -0.16 | 1.48  | -0.05 | 0.91  | 1.30  | 0.81  | 0.75  | 0.59  | 1.38  | 1.15  | 1.26  | 0.78  | 1.94  | 0.14  | -0.08 |
| -1.88  | -3.82  | -0.11  | -0.03 | 0.31  | -0.90 | -1.38 | 1.36  | -0.80 | 1.21  | 0.17  | -1.15 | -0.79 | -0.23 | 2.57  | 0.26  | 2.34  | 1.63  | 0.56  | 1.15  | 2.22  | -0.54 | 1.16  | 1.23  | 0.72  | -0.75 | 0.36  | 1.65  |
| -0.81  | 1.48   | -0.08  | -0.81 | -0.49 | -1.48 | -0.85 | -0.24 | -0.64 | -0.89 | 0.75  | -0.98 | -0.24 | -0.90 | 0.38  | 1.05  | 1.20  | 0.29  | 0.65  | 0.01  | 1.21  | 0.99  | 0.60  | -0.03 | 1.14  | 2.10  | -1.03 | -0.25 |
| 2.08   | 2.77   | 1.47   | 1.39  | 2.37  | -0.80 | 1.62  | 1.10  | -0.93 | 0.70  | 0.80  | -0.51 | -0.55 | -1.01 | 0.50  | 0.83  | 1.58  | 2.09  | 0.78  | 1.19  | 1.38  | 0.27  | 1.49  | 0.86  | 1.03  | 2.57  | 1.09  | 1.02  |
| 2.97   | 3.26   | 2.38   | 2.15  | 5.23  | 0.04  | 2.17  | 4.61  | 0.81  | 0.27  | 1.88  | 1.79  | 0.73  | -0.95 | 1.46  | 0.33  | 1.52  | 0.54  | 1.79  | 1.05  | 0.23  | 1.79  | -1.01 | -0.28 | 1.18  | -1.17 | 3.06  | 1.46  |
| 0.12   | -2.60  | -1.63  | 0.70  | -4.47 | 2.53  | 1.20  | 5.09  | 3.12  | 4.47  | 2.06  | 1.97  | 4.52  | 3.83  | -1.36 | -0.32 | -0.28 | 2.20  | -2.90 | -2.01 | 1.33  | -1.61 | -1.37 | 1.61  | 1.89  | 2.81  | 2.78  | 1.03  |
| -6.86  | -17.44 | -6.70  | -2.07 | -4.50 | 4.12  | 3.01  | 9.60  | 9.22  | 7.66  | 7.39  | 6.04  | 7.86  | 6.32  | -1.42 | -1.71 | -1.11 | 2.86  | -8.92 | 1.62  | -1.49 | -0.46 | -2.52 | 1.75  | 1.60  | 3.35  | 2.09  | -0.68 |
| -1.85  | -7.25  | -3.53  | -3.36 | 0.36  | -5.78 | -2.75 | -0.50 | -3.52 | -1.81 | -1.94 | -5.27 | -4.96 | -4.17 | 2.13  | 2.95  | 3.73  | 5.38  | -1.91 | 3.96  | 5.09  | 3.10  | -2.85 | -2.32 | -2.58 | 0.96  | -1.99 | -4.19 |
| -12.43 | -18.17 | -11.60 | -8.70 | -6.03 | -0.88 | -0.19 | 1.28  | -0.85 | 2.18  | 0.04  | -0.66 | -0.01 | -0.09 | 3.20  | 0.31  | 2.69  | -0.29 | 1.40  | 1.22  | 3.20  | 1.33  | 1.76  | 2.67  | 1.89  | -0.71 | -0.52 | 0.64  |
| -3.77  | -2.06  | -5.43  | -8.06 | -0.47 | -2.51 | -0.29 | 0.33  | -1.35 | -0.02 | 0.03  | -0.61 | 0.00  | -0.05 | 1.01  | -0.25 | 0.29  | 0.48  | -1.47 | 1.46  | 0.08  | -1.70 | -0.59 | 0.76  | -1.86 | -6.43 | -2.17 | -2.51 |
| -0.36  | 0.32   | 0.71   | -1.93 | 0.79  | -2.59 | -0.06 | 0.46  | -0.01 | -0.24 | 1.34  | -1.77 | -0.74 | -1.16 | 0.23  | -0.66 | -0.47 | -0.49 | -0.10 | 1.60  | -0.60 | -0.01 | -0.14 | -0.97 | 0.26  | 1.17  | -0.03 | 0.31  |
| 0.85   | 3.61   | 1.75   | 1.42  | 2.48  | -0.57 | 1.34  | 0.89  | -0.23 | -0.66 | 0.45  | -0.96 | 0.07  | 0.77  | 0.46  | 3.71  | 2.73  | 2.35  | 0.81  | 1.91  | 2.56  | 1.44  | 2.48  | 2.17  | 3.37  | 2.13  | 2.15  | 0.77  |
| -0.51  | -1.39  | -0.02  | -0.94 | -0.30 | -2.24 | -0.44 | -0.29 | -2.07 | -0.40 | -0.80 | -1.50 | -0.49 | -0.86 | 0.27  | -1.34 | -0.09 | -0.26 | 0.72  | 0.15  | 0.19  | -0.08 | -1.48 | 0.25  | -1.34 | -0.01 | -0.01 | -0.52 |
| 2.04   | 1.22   | 3.37   | 0.74  | 2.54  | 1.04  | 0.99  | -0.21 | -2.30 | 0.70  | 1.50  | -0.24 | 0.66  | -0.41 | 2.92  | 1.94  | 2.90  | 1.07  | 0.52  | 1.74  | 1.82  | 2.45  | 2.33  | 1.84  | 2.50  | 1.66  | 2.13  | 2.07  |
| -1.13  | -1.22  | -2.07  | -1.57 | 0.03  | -1.17 | -0.76 | -0.83 | -0.84 | -0.49 | -1.48 | -1.78 | -0.63 | -0.41 | -1.46 | -0.62 | -0.75 | -1.88 | -0.27 | -1.72 | -1.32 | -2.94 | -4.04 | -3.41 | -2.08 | -1.39 | -2.97 | -2.86 |
| -0.46  | -1.09  | -1.30  | 0.35  | -0.62 | -1.60 | -1.22 | -0.48 | -0.86 | -0.48 | -0.79 | 0.01  | -0.76 | -1.37 | -0.30 | 0.02  | -0.99 | -0.74 | -1.46 | 0.64  | -0.99 | 0.63  | -3.18 | -1.79 | -2.09 | -1.27 | -1.78 | -1.64 |
| 1.65   | 0.59   | 0.04   | 1.91  | 0.71  | -1.23 | 0.88  | 0.73  | -1.37 | -1.38 | -1.70 | -1.32 | -0.05 | 1.75  | -0.69 | -0.34 | 0.38  | -0.68 | -0.06 | 0.84  | -0.98 | -0.06 | -1.68 | 0.04  | 1.40  | 0.78  | 0.65  | -0.01 |
| 0.01   | 3.79   | 2.92   | 1.88  | 1.24  | -1.00 | 1.00  | 1.66  | -0.20 | 1.46  | 1.07  | -1.02 | 0.12  | -1.01 | 2.61  | 3.38  | 2.57  | 1.61  | 1.14  | 2.34  | 1.83  | 3.81  | 1.32  | 2.28  | 1.89  | 1.91  | 2.48  | 1.60  |
| 2.54   | 3.30   | 3.21   | 1.39  | 3.35  | 0.37  | 0.36  | -0.09 | 1.26  | 0.25  | 0.22  | -0.46 | 0.52  | 0.37  | 1.25  | 0.94  | 1.25  | 1.70  | 1.64  | 1.83  | 2.28  | 1.11  | 1.24  | 1.21  | 1.50  | 1.55  | 2.48  | 2.14  |
| -1.06  | -4.41  | 0.83   | 1.71  | -0.41 | -0.02 | 0.17  | 0.49  | -0.12 | 1.60  | 0.89  | -0.55 | 0.59  | 1.49  | 0.78  | 0.71  | 2.73  | 1.30  | 0.56  | -0.06 | 0.49  | -1.11 | 1.52  | 0.38  | 1.05  | 0.49  | 0.94  | 1.78  |
| -1.91  | -4.75  | -4.34  | 0.12  | -0.54 | -0.03 | 1.93  | 2.01  | 0.55  | 2.61  | 0.69  | 0.65  | 2.00  | 1.94  | 0.70  | 1.75  | 1.72  | 0.94  | 2.15  | 1.76  | 1.64  | 1.73  | 3.36  | 2.63  | 1.12  | 1.85  | -0.12 | 1.15  |
| -3.81  | -15.08 | -9.58  | -2.23 | -3.34 | 1.19  | 2.52  | 2.60  | 0.88  | 3.23  | 2.43  | 0.88  | 3.78  | 3.46  | 2.80  | 2.55  | 2.84  | 3.45  | 0.92  | 2.91  | 1.80  | 2.71  | 3.86  | 3.56  | 2.67  | 2.79  | -0.70 | 0.49  |
| -3.12  | -6.62  | -4.74  | 0.14  | -2.22 | -1.20 | -2.22 | 0.21  | -2.36 | -1.59 | -0.80 | -1.57 | -2.28 | -0.70 | 0.40  | 0.08  | -0.03 | -0.26 | -0.01 | -0.17 | 1.59  | 0.11  | 0.06  | -1.30 | -1.04 | -0.18 | -1.17 | 0.50  |
| -6.68  | -5.92  | -4.98  | -1.25 | -2.04 | 0.41  | 0.87  | 0.04  | -0.31 | 0.34  | 0.14  | 0.23  | 0.06  | -0.69 | 1.32  | -0.37 | 0.93  | 0.15  | 0.51  | -0.10 | 1.23  | 0.86  | -0.15 | 0.32  | 1.03  | 1.23  | 0.61  | 0.72  |
| -6.32  | -7.45  | -4.78  | -0.55 | -4.48 | -0.21 | 0.29  | 1.55  | 0.75  | 1.14  | 0.86  | 0.79  | 0.74  | 0.21  | 0.85  | -0.35 | 0.59  | 1.15  | 1.43  | 0.15  | 0.66  | 0.92  | -0.28 | 1.05  | 1.22  | 1.50  | 1.05  | 0.73  |
| -2.02  | -6.21  | -4.34  | -2.99 | -0.52 | -2.41 | -0.74 | 0.54  | -2.96 | 1.40  | 3.39  | -2.11 | -2.32 | -1.75 | 1.92  | -0.11 | 0.85  | 1.79  | 0.90  | 2.41  | 1.63  | 0.61  | 1.01  | 0.01  | 0.90  | 0.61  | -1.58 | -0.53 |
| 1.68   | 2.04   | -0.44  | 0.88  | 0.53  | -1.38 | 0.09  | 1.03  | -1.87 | -0.32 | 0.55  | -1.61 | -0.24 | -1.18 | 1.88  | 0.29  | 0.43  | 0.39  | -0.59 | 1.86  | 0.31  | 0.92  | 0.06  | 1.66  | 0.30  | 0.25  | 1.98  | 0.94  |
| 0.01   | 0.34   | 1.05   | 0.25  | 0.10  | -2.17 | -0.49 | -0.82 | -1.72 | -0.04 | -0.45 | -1.43 | -0.01 | -0.53 | 0.10  | -1.09 | 0.31  | 0.21  | -0.46 | -0.76 | 0.03  | 0.19  | -1.02 | 0.77  | 0.21  | 0.21  | -0.21 | 0.04  |
| 3.32   | 0.54   | 1.46   | 2.41  | 1.80  | -0.64 | -0.11 | 0.71  | -2.06 | -0.23 | 0.22  | -1.43 | -0.07 | -0.89 | -0.84 | 1.07  | 0.54  | 0.39  | 0.11  | -0.18 | 0.99  | -0.08 | 0.93  | 0.43  | 0.88  | -0.81 | -0.60 | 1.92  |
| -0.47  | 1.86   | 0.92   | 1.08  | -0.51 | -2.46 | -0.35 | 0.90  | -1.94 | -0.60 | -1.00 | -1.74 | 0.10  | 0.33  | -0.49 | 0.98  | 0.48  | -0.44 | 1.08  | -0.28 | 0.88  | 0.00  | -8.03 | -9.32 | -8.73 | -7.81 | -4.50 | -6.51 |
| 0.77   | 0.87   | 1.08   | 1.03  | 2.10  | -1.42 | -0.14 | -0.23 | -2.12 | 0.08  | -0.36 | -1.47 | -0.51 | -1.01 | 1.38  | 0.60  | 1.08  | 1.24  | 0.37  | 1.87  | 1.23  | 0.72  | 0.18  | -0.19 | 1.14  | 1.30  | 0.61  | -0.19 |
| 1.69   | 3.80   | 1.82   | 1.61  | 0.91  | -2.78 | -2.29 | -1.28 | -3.34 | -0.77 | -0.88 | -3.20 | -2.22 | -1.02 | 2.42  | 2.27  | 2.35  | 0.46  | 0.63  | 0.83  | -0.65 | -0.63 | 5.45  | 5.97  | 3.02  | 2.32  | 6.37  | 1.40  |
| 1.43   | 2.41   | 0.97   | 1.54  | 1.20  | -0.78 | 1.52  | 1.21  | -0.44 | 2.17  | 2.27  | 0.22  | 1.30  | 0.44  | 1.21  | 2.25  | 2.30  | 1.75  | 0.97  | 1.48  | 2.26  | 0.92  | 0.51  | 0.67  | 0.71  | 1.10  | 1.08  | 1.82  |
| 0.07   | 0.57   | 1.40   | 1.27  | 1.47  | -0.06 | 0.70  | 0.56  | 0.34  | 0.08  | 0.41  | -0.12 | 0.58  | 0.91  | 0.83  | 0.77  | 0.55  | 0.65  | 1.03  | 1.32  | 1.04  | 1.64  | 1.31  | 1.33  | 1.83  | 1.50  | 1.63  | 1.21  |
| 2.12   | 3.02   | 2.01   | 1.93  | 1.92  | -1.23 | 0.90  | 1.91  | -2.03 | 2.10  | 0.84  | -0.26 | -0.30 | 0.12  | 1.04  | -0.36 | 2.00  | 1.49  | 0.27  | -0.17 | 1.63  | -1.08 | 0.30  | 0.37  | 0.48  | 1.80  | 1.58  | 1.37  |
| -2.50  | -3.09  | -1.16  | -1.56 | -0.11 | -1.91 | -0.37 | 0.15  | 0.37  | 1.54  | 0.15  | -1.83 | -0.92 | 0.06  | 0.63  | -0.07 | 0.25  | -0.42 | -0.72 | 0.23  | 0.28  | 1.77  | -0.99 | -1.09 | -1.46 | 0.67  | -0.61 | 0.10  |
| 0.22   | -0.52  | 0.38   | -0.37 | 0.47  | -1.20 | -0.22 | 0.24  | -1.46 | -0.48 | -0.46 | -0.52 | -0.24 | -0.61 | 1.69  | 0.44  | 0.88  | 1.14  | 0.10  | 0.17  | 1.13  | -0.59 | 0.13  | 0.40  | 0.02  | -0.20 | -0.17 | 0.35  |
| 2.30   | 2.69   | 1.03   | 0.04  | 0.75  | -0.80 | 0.25  | -0.31 | -1.84 | 1.46  | 1.46  | 1.46  | -0.13 | 0.63  | -0.72 | 0.81  | 0.92  | 0.82  | -0.06 | 1.05  | 0.78  | 0.61  | 1.24  | 1.33  | -0.43 | 2.01  | -0.09 | 1.28  |
| -0.35  | 2.26   | 1.02   | 0.35  | 2.23  | -1.44 | -1.34 | -0.38 | -0.48 | -1.77 | -0.32 | -1.98 | -1.84 | -2.05 | 1.40  | 2.38  | 2.56  | 1.95  | 1.69  | 0.34  | 1.86  | 2.23  | 0.54  | 0.28  | 1.48  | 1.27  | 1.58  | 1.06  |
| 1.64   | 1.81   | 1.09   | 0.87  | 0.89  | -0.79 | -0.27 | 0.90  | -0.03 | 0.84  | 0.24  | -0.10 | 0.57  | 0.26  | 0.15  | -0.56 | 0.78  | 0.87  | 0.77  | 1.30  | 0.91  | 1.03  | 0.03  | 0.23  | -0.12 | 1.68  | 0.05  | 0.84  |
| -0.06  | -0.48  | 2.21   | 1.85  | -0.54 | -1.20 | -1.37 | 0.88  | -0.42 | -0.25 | 0.38  | 0.26  | -0.02 | 0.39  | -0.17 | 1.74  | 0.31  | 0.03  | 0.41  | -1.12 | -0.49 | -0.92 | 0.45  | 0.41  | -0.16 | -0.68 | 0.84  | 0.76  |
| -2.55  | -5.42  | -1.53  | -2.99 | -4.16 | -0.15 | -0.13 | 0.51  | -0.06 | 0.97  | 0.91  | -0.41 | 1.75  | 0.46  | 0.54  | -0.92 | 0.03  | -3.23 | 0.46  | 0.26  | 0.37  | 0.43  | 1.09  | 0.80  | -0.37 | 2.70  | -2.36 | 0.50  |
| -3.18  | -4.01  | -1.10  | 0.39  | -7.42 | 0.79  | 0.17  | 1.26  | 0.98  | 0.43  | 1.10  | 0.47  | 1.02  | 0.51  | 0.13  | 1.05  | 0.45  | 0.14  | -1.07 | -0.35 | -0.67 | 0.93  | 1.50  | 0.28  | 0.72  | 0.05  | -0.75 | -1.01 |
| -0.92  | -8.97  | -3.71  | -4.46 | -2.63 | -3.32 | -2.23 | -0.50 | -3.01 | -2.26 | -1.03 | -3.45 | -2.58 | -1.46 | 2.99  | 0.38  | 1.43  | -0.73 | -1.28 | 0.94  | 2.32  | 0.76  | 0.88  | 2.24  | -3.10 | -1.59 | -4.41 | -0.63 |
| 1      |        |        |       |       |       |       |       |       |       |       |       |       |       |       |       |       |       |       |       |       |       |       |       |       |       |       |       |



|        |        |        |       |       |       |       |       |       |       |       |       |       |       |       |       |       |       |       |       |       |       |        |        |       |       |       |       |      |
|--------|--------|--------|-------|-------|-------|-------|-------|-------|-------|-------|-------|-------|-------|-------|-------|-------|-------|-------|-------|-------|-------|--------|--------|-------|-------|-------|-------|------|
| -0.66  | -2.22  | -2.37  | -0.58 | -0.28 | -1.20 | 0.67  | 0.19  | -2.00 | 1.05  | 0.99  | -0.45 | -0.49 | -0.63 | 0.30  | 1.57  | 0.93  | 2.12  | -0.97 | -0.63 | 1.27  | 0.14  | -0.34  | 1.06   | 1.26  | -0.71 | -0.08 | 0.26  |      |
| -1.28  | -0.35  | 0.55   | 0.12  | 0.26  | -2.23 | -0.41 | -0.03 | -0.80 | -0.05 | 0.29  | -1.06 | 0.34  | -0.83 | 1.03  | 0.14  | 1.66  | 0.47  | 1.16  | 1.62  | 0.78  | 1.33  | 1.28   | 0.75   | 1.40  | 2.45  | 1.17  | 1.29  |      |
| -2.21  | -4.03  | -1.22  | 0.63  | 1.24  | -1.50 | -1.04 | 1.53  | -1.21 | 1.31  | -0.45 | -2.94 | -0.78 | -1.55 | 2.69  | -0.55 | 1.86  | 2.50  | 1.24  | 1.23  | 0.48  | -0.40 | 2.28   | 1.06   | 0.61  | -0.06 | 0.95  | 1.17  |      |
| 0.58   | 0.68   | -1.01  | -0.47 | -0.10 | -1.15 | -0.66 | 0.08  | -0.43 | 0.18  | 1.26  | -1.70 | -0.03 | -0.39 | 0.66  | 0.33  | -0.18 | 0.77  | 1.16  | 0.43  | 1.87  | 1.27  | -0.41  | 0.96   | 0.67  | 0.60  | 0.23  | -0.88 |      |
| 1.78   | 3.42   | 1.52   | 1.48  | 2.82  | -0.82 | 1.69  | 1.03  | -1.09 | 0.03  | 0.37  | -0.79 | -0.73 | -1.24 | 1.04  | 1.15  | 2.48  | 2.21  | 0.96  | 1.25  | 1.73  | 0.71  | 1.60   | 0.92   | 1.37  | 2.63  | 0.97  | 0.94  |      |
| 3.76   | 5.11   | 2.57   | 3.00  | 6.26  | 1.18  | 3.81  | 4.27  | 1.37  | 0.29  | 1.70  | 1.44  | 2.42  | -0.75 | 1.83  | 1.12  | 1.67  | 1.19  | 2.17  | -0.19 | 1.65  | 1.90  | 0.72   | 0.40   | 1.70  | 0.18  | 3.59  | 2.32  |      |
| 0.53   | -2.57  | -0.88  | 3.17  | 0.14  | 4.00  | 3.27  | 9.75  | 6.26  | 6.70  | 4.29  | 4.71  | 8.30  | 7.31  | -2.09 | -1.41 | 0.43  | 0.29  | -2.17 | -1.07 | 0.48  | -0.10 | 0.83   | 2.43   | 4.88  | 3.66  | 3.92  | 2.17  |      |
| -7.94  | -19.70 | -4.73  | 0.88  | -3.48 | -4.83 | 9.13  | 6.23  | 17.31 | 16.74 | 16.07 | 11.66 | 10.80 | 16.07 | 15.01 | -0.83 | -1.99 | 0.30  | -1.30 | -6.26 | 1.92  | 1.46  | 0.93   | 0.10   | 4.34  | 4.12  | 5.15  | 2.06  | 1.23 |
| -3.43  | -11.67 | -3.68  | -2.88 | -4.48 | -8.80 | 6.37  | -3.50 | -6.80 | -5.23 | -2.78 | -7.77 | -7.58 | -7.04 | 1.72  | 2.25  | 3.59  | 1.46  | -2.21 | 3.89  | 5.12  | 3.53  | -2.91  | -2.34  | -3.64 | -1.13 | -4.09 | -3.98 |      |
| -13.89 | -19.29 | -10.05 | -8.00 | -4.59 | 0.51  | 0.39  | 3.07  | -0.15 | 3.58  | 1.49  | 0.70  | 2.33  | -0.56 | 4.22  | 2.02  | 5.16  | 3.03  | 4.78  | 4.48  | 4.46  | 2.93  | 1.79   | 3.30   | 5.84  | 0.85  | 2.07  | 1.53  |      |
| -4.64  | -2.78  | -4.75  | -0.17 | -0.28 | -1.78 | 0.51  | -0.47 | -1.51 | 0.34  | -0.01 | -1.70 | -0.29 | 0.36  | 0.81  | -0.64 | 0.51  | 0.30  | -0.47 | 1.99  | 0.17  | -0.75 | -0.28  | 0.73   | -0.83 | -7.60 | -1.59 | -1.40 |      |
| 0.81   | 0.81   | 0.54   | -1.43 | 1.19  | -1.00 | -1.33 | -0.03 | -1.22 | -0.41 | -0.85 | -1.51 | -2.13 | -1.61 | 2.01  | -0.22 | -1.09 | -0.21 | 0.55  | 0.99  | 0.01  | 0.21  | -0.09  | -0.70  | 0.38  | 1.59  | 0.18  | 0.22  |      |
| 2.67   | 3.41   | 2.97   | 2.91  | 3.42  | -1.29 | 1.29  | -0.22 | -0.47 | 0.75  | 0.76  | -1.17 | 1.25  | 1.10  | 1.12  | 3.04  | 3.81  | 3.80  | 2.03  | 2.86  | 3.22  | 2.10  | 2.70   | 3.11   | 3.94  | 2.26  | 2.90  | 1.03  |      |
| -0.94  | -2.74  | -0.23  | -0.70 | -1.16 | -2.00 | -0.28 | 0.38  | -2.23 | 0.10  | -1.15 | -1.65 | -0.62 | -1.36 | -0.08 | -0.80 | -0.71 | -0.28 | 0.17  | -0.17 | -0.49 | -0.25 | -1.43  | 0.41   | -1.11 | -0.56 | -0.47 | -0.18 |      |
| 1.86   | 2.50   | 0.83   | 1.70  | 3.66  | 0.94  | 0.79  | 1.88  | -2.04 | 1.33  | 0.78  | -0.73 | 0.81  | -1.17 | 3.33  | 2.63  | 4.72  | 1.59  | 1.92  | 2.24  | 2.78  | 3.98  | 3.60   | 2.86   | 3.11  | 1.65  | 3.32  | 2.57  |      |
| -1.75  | -1.97  | -1.67  | -1.59 | -0.23 | -0.35 | -0.41 | 0.20  | -0.15 | 0.80  | -0.64 | -0.90 | 0.13  | -1.07 | -2.20 | -1.09 | -0.85 | -3.32 | -1.11 | -1.43 | -0.46 | -3.57 | -3.45  | -2.96  | -2.65 | -1.94 | -3.82 | -4.21 |      |
| -0.28  | -1.67  | -1.95  | -1.06 | -0.49 | -1.64 | -0.75 | 0.12  | -0.66 | -0.59 | -0.79 | -0.16 | -0.01 | -1.13 | -1.12 | -0.57 | -1.03 | -0.11 | -0.91 | 0.28  | -0.28 | -1.13 | -3.90  | -2.39  | -2.34 | -1.71 | -2.10 | -1.92 |      |
| 1.59   | -1.17  | -0.43  | 1.67  | 2.98  | -0.59 | -0.86 | 1.03  | -0.96 | -1.13 | -0.14 | -1.10 | 1.41  | 0.88  | -1.01 | -1.08 | 0.24  | -0.60 | -0.94 | 0.46  | -0.39 | 0.24  | -1.68  | -0.29  | 0.39  | -0.04 | -0.17 | 0.46  |      |
| 0.28   | 3.19   | 3.80   | 0.69  | 1.56  | -1.45 | 1.14  | 2.21  | -0.81 | 1.01  | 0.31  | -0.63 | 0.41  | -1.45 | 3.32  | 2.34  | 3.89  | 1.93  | 1.88  | 4.18  | 1.72  | 3.69  | 2.79   | 3.37   | 3.77  | 2.50  | 1.62  | 2.57  |      |
| 3.22   | 3.95   | 3.22   | 1.95  | 3.03  | 0.37  | 0.19  | -0.15 | 1.53  | 0.59  | 0.35  | 0.47  | -0.31 | 0.10  | 1.93  | 1.91  | 1.08  | 2.08  | 1.02  | 1.66  | 2.02  | 1.42  | 0.93   | 1.01   | 1.75  | 1.83  | 3.01  | 1.73  |      |
| -0.61  | -2.51  | 1.27   | 1.65  | 0.05  | 0.10  | 0.63  | 0.61  | 0.12  | 0.75  | 0.31  | 0.11  | 2.72  | 2.43  | 1.61  | 1.58  | 1.38  | 0.94  | 0.34  | 1.18  | 1.70  | -0.04 | 0.89   | 0.41   | 1.03  | -0.21 | 1.36  | 0.91  |      |
| -1.41  | -6.30  | -4.52  | -0.62 | -0.58 | 2.11  | 3.23  | 4.15  | 1.59  | 5.26  | 3.01  | 0.69  | 3.95  | 4.17  | 2.29  | 2.78  | 3.01  | 2.30  | 2.89  | 2.08  | 3.54  | 3.82  | 3.26   | 2.84   | 3.17  | 2.90  | 4.43  | 1.47  |      |
| -4.27  | -16.88 | -9.03  | -2.03 | -3.83 | 3.98  | 5.22  | 6.55  | 3.19  | 8.64  | 5.14  | 3.21  | 8.42  | 6.69  | 3.61  | 3.97  | 4.01  | 3.32  | 2.92  | 5.48  | 4.04  | 4.64  | 4.42   | 5.40   | 4.63  | 3.95  | 4.42  | 3.12  |      |
| -3.89  | -6.30  | -4.46  | -0.68 | -3.64 | -2.91 | -1.95 | -0.82 | -2.06 | -3.04 | -1.66 | -2.63 | -2.67 | -3.57 | 1.21  | -0.12 | 0.58  | -0.68 | -0.72 | -0.34 | 1.46  | 1.12  | 0.93   | -1.49  | -0.69 | -0.43 | -1.09 | -0.11 |      |
| -7.30  | -9.89  | -4.03  | -1.81 | -2.95 | 0.12  | 0.50  | -0.25 | -0.10 | 0.83  | 0.77  | -0.81 | -0.34 | -0.71 | 1.81  | -0.34 | 0.80  | 0.12  | 0.73  | -0.01 | 1.34  | 0.58  | 0.08   | 0.25   | 1.27  | 0.92  | 1.24  | 0.70  |      |
| -8.07  | -10.11 | -4.93  | -0.86 | -4.76 | 1.21  | 0.88  | 2.56  | 1.51  | 2.13  | 1.70  | 2.32  | 1.79  | 1.15  | 0.72  | -0.65 | 0.19  | 1.77  | 2.07  | 1.17  | 0.83  | -0.39 | -0.13  | 1.40   | 1.67  | 1.27  | 1.40  | 0.82  |      |
| -3.52  | -10.59 | -4.48  | -3.47 | -0.58 | -3.78 | -1.52 | -1.71 | -3.84 | -1.77 | -4.91 | -2.93 | -3.66 | -3.18 | 2.49  | 0.93  | 0.72  | 0.95  | 0.89  | 3.12  | 1.70  | 1.03  | 0.39   | -1.56  | 0.17  | 0.06  | -1.82 | -0.76 |      |
| 0.94   | 2.03   | 0.75   | 1.49  | 0.14  | -1.72 | -0.08 | 0.99  | -1.98 | 0.15  | 0.43  | -1.97 | -0.46 | -1.28 | 0.32  | -0.77 | 0.97  | -0.38 | 0.36  | 2.04  | 0.62  | 1.09  | -0.12  | 0.89   | 0.66  | 0.67  | 1.17  | 0.51  |      |
| 0.77   | -0.43  | 0.54   | 0.02  | 0.51  | -1.99 | -0.60 | -0.63 | -1.27 | -0.31 | -0.39 | -1.50 | 0.27  | -1.07 | 0.28  | -0.66 | 0.55  | 0.39  | -0.62 | -0.27 | 0.59  | 0.41  | -0.26  | 0.50   | 1.01  | -0.03 | -0.37 | 0.92  |      |
| 1.12   | 0.83   | 0.16   | 0.04  | 0.40  | -0.92 | -0.62 | 1.23  | -2.43 | -0.22 | -0.08 | -1.76 | -0.04 | -0.87 | 0.29  | 1.09  | 0.52  | 1.09  | 0.12  | 0.12  | 0.12  | 0.21  | 0.26   | -0.13  | 0.40  | 1.12  | 0.66  | -0.38 | 2.33 |
| 1.17   | -0.87  | 0.88   | 0.70  | -1.49 | -2.66 | -0.52 | 0.72  | -2.31 | -1.39 | -1.34 | -1.90 | 0.16  | -0.28 | -0.38 | 1.38  | 1.89  | -0.41 | 0.78  | 0.12  | 1.82  | 0.62  | -10.41 | -10.41 | -9.99 | -9.63 | -4.47 | -7.57 |      |
| -0.11  | 1.00   | 0.45   | 0.76  | 1.28  | -1.44 | -0.48 | -0.12 | -2.38 | -0.06 | -0.53 | -2.21 | -1.28 | -1.41 | 1.86  | 0.53  | 0.90  | 1.69  | 0.72  | 2.19  | 0.57  | 0.48  | 0.57   | 1.29   | 2.35  | 1.87  | 3.07  | -0.43 |      |
| 1.48   | 2.70   | 2.26   | 1.21  | 1.81  | -4.14 | -3.09 | -2.47 | -2.92 | -3.46 | -2.87 | -3.46 | -3.50 | -2.37 | 1.89  | 2.44  | 1.34  | 1.92  | 2.05  | 1.88  | 1.89  | 1.32  | 5.29   | 5.95   | 4.25  | 2.70  | 7.60  | 2.38  |      |
| 2.22   | 3.41   | 1.70   | 0.86  | 1.22  | -0.64 | 1.13  | 1.28  | -0.40 | 2.43  | 0.89  | 0.98  | 2.40  | 0.91  | 2.70  | 1.87  | 1.78  | 2.08  | 1.42  | 1.51  | 2.31  | 0.57  | 0.37   | 1.02   | 0.83  | 1.26  | 1.01  | 1.87  |      |
| -0.19  | 0.81   | 1.99   | 1.40  | 2.07  | -0.46 | 0.68  | 0.84  | 0.94  | 0.49  | 1.37  | -0.59 | 0.51  | 0.90  | 0.81  | 0.83  | 0.98  | 1.48  | 1.71  | 1.67  | 1.72  | 2.51  | 1.21   | 3.34   | 3.70  | 1.48  | 2.69  | 1.91  |      |
| 1.27   | 0.83   | 1.65   | 3.29  | 0.29  | -1.53 | 1.15  | 0.08  | -1.48 | -0.51 | 0.28  | -0.03 | 0.22  | 0.02  | 1.10  | -1.12 | 2.13  | 1.05  | -0.29 | 0.77  | 0.82  | -1.55 | -0.05  | 0.79   | 0.61  | 1.58  | 1.70  | 2.86  |      |
| -3.50  | -4.40  | -1.82  | -0.71 | -0.72 | -1.29 | -0.50 | -0.23 | -0.38 | 0.81  | 1.07  | -1.41 | 0.24  | -0.32 | 0.44  | 1.19  | 0.97  | 0.01  | 0.76  | 0.44  | 0.45  | 0.52  | 0.25   | -1.75  | 0.11  | 1.23  | -0.17 | 0.06  |      |
| -1.64  | -0.21  | -1.05  | 0.26  | 0.70  | -1.80 | -0.01 | -0.26 | -1.43 | -0.29 | -0.32 | -0.95 | -0.58 | -0.77 | 1.36  | 0.59  | 1.33  | 1.19  | -0.26 | 0.45  | 1.14  | 0.83  | -0.17  | 0.04   | 0.41  | 0.80  | 0.45  | 0.78  |      |
| 1.04   | 4.03   | 1.05   | 0.70  | 0.72  | -0.47 | -0.06 | -0.19 | -1.01 | 1.47  | 1.80  | -0.71 | 0.28  | 0.81  | 0.26  | 0.87  | 0.68  | 0.86  | 0.98  | 1.08  | 1.19  | 0.62  | 2.00   | 1.55   | 0.26  | -0.13 | 0.71  | 2.10  |      |
| -0.32  | 2.12   | 1.45   | -0.34 | 1.97  | -3.96 | -1.74 | -1.34 | -3.42 | -2.74 | -0.88 | -3.48 | -2.71 | -1.63 | 1.46  | 2.24  | 2.88  | 3.04  | 3.03  | 0.92  | 2.48  | 2.50  | 1.08   | 0.17   | 1.23  | 1.70  | 2.14  | 1.32  |      |
| 2.04   | 2.34   | 1.52   | 1.52  | 0.94  | 0.36  | 0.10  | 0.86  | 0.46  | 1.51  | 0.19  | 0.15  | 0.55  | -0.27 | 0.50  | -0.37 | 1.08  | 0.92  | 0.44  | 1.41  | 0.88  | 4.49  | -0.49  | 0.58   | 0.22  | 1.44  | -0.09 | 0.84  |      |
| -0.81  | 0.86   | -0.54  | 3.00  | 0.87  | -1.74 | -2.05 | 0.53  | -0.77 | 0.55  | 0.58  | 0.07  | 0.49  | -0.17 | -0.19 | 1.08  | 0.06  | 0.81  | -0.20 | -0.84 | 0.79  | -0.23 | 0.13   | 0.25   | 0.19  | -0.19 | -0.38 | 1.18  |      |
| -3.40  | -5.92  | -1.62  | -3.01 | -4.68 | 0.31  | 0.17  | 0.51  | -0.05 | 0.90  | 0.93  | 0.25  | 1.68  | 1.22  | 0.13  | -0.32 | -1.23 | -1.84 | -0.11 | 0.18  | 0.36  | 0.70  | 1.26   | 0.12   | 1.79  | 2.47  | 1.13  | 0.10  |      |
| -3.82  | -4.62  | -1.01  | -0.69 | -6.96 | 0.66  | 0.84  | 2.04  | 1.19  | 2.75  | 1.79  | 0.52  | 2.71  | 0.81  | 0.46  | 0.64  | 0.92  | 0.26  | -0.95 | 0.34  | -0.59 | 0.67  | 1.69   | 0.95   | 1.90  | -0.29 | -1.09 | -0.23 |      |
| -2.98  | -10.13 | -4.03  | -6.54 | -2.53 | -6.07 | -4.09 | -2.88 | -4.02 | -5.22 | -2.53 | -5.46 | -5.57 | -3.18 | 2.95  | 0.85  | -0.02 | -0.68 | -0.69 | -0.86 | 3.40  | 0.76  | 0.63   | -0.28  | -1.88 | -2.69 | -5.46 | -1.84 |      |
| 1.93   | 1.58   | 1.28   | 1.40  | -1.17 | -4.28 | -2.33 | -0.78 | -2.17 | -2.99 | -1.50 | -3.39 | -1.32 | -1.57 | 3.57  | 2.53  | 4.03  | 3.02  | 3.85  | 1.83  | 3.06  | 2.83  | 2.16   | 1.45   | 2.46  | 2.53  | 2.14  | 2.78  |      |
| 4.33   | 7.05   | 3.55   | 3.12  | 2.30  | -6.18 | -1.69 | -2.42 | -6.49 | -2.07 | -1.22 | -6.82 | -3.49 | -3.40 | 5.51  | 4.86  | 5.05  | 5.10  | 3.91  | 5.23  | 5.72  | 4.73  | 2.46   | 2.04   | 2.89  | 2.49  | 2.67  | 2.20  |      |
| 1.23   | -2.41  | -1.06  | -0.27 | -0.23 | 0.23  | -1.37 | 0.97  | -0.37 | 0.74  | -0.30 | 0.58  | -0.49 | -1.14 | 1.12  | -0.22 | 1.81  | 1.16  | 3.56  | 1.42  | 0.28  | -0.44 | -0.22  | 1.76   | 0.19  | 1.    |       |       |      |

|        |        |        |       |        |        |       |       |        |       |       |        |        |        |       |       |        |       |       |        |        |        |       |        |        |        |        |        |
|--------|--------|--------|-------|--------|--------|-------|-------|--------|-------|-------|--------|--------|--------|-------|-------|--------|-------|-------|--------|--------|--------|-------|--------|--------|--------|--------|--------|
| -0.58  | 0.29   | -0.65  | -1.41 | 0.62   | -1.58  | -0.25 | -0.43 | -0.79  | 0.22  | 1.27  | -1.41  | -0.65  | -1.09  | 1.03  | 0.90  | -0.17  | 1.08  | 0.50  | -0.26  | 1.49   | 1.92   | 0.51  | 0.56   | 0.95   | 0.87   | -0.07  | 0.04   |
| 3.20   | 3.14   | 2.32   | 2.23  | 3.40   | -1.86  | 1.00  | -0.25 | -1.63  | -0.37 | 0.46  | -1.66  | -1.50  | -2.01  | 1.14  | 0.41  | 2.63   | 1.94  | 0.70  | 1.53   | 1.96   | 0.83   | 1.54  | 0.38   | 1.75   | 2.76   | 0.78   | 0.84   |
| 4.08   | 4.39   | 3.93   | 2.28  | 5.09   | 1.27   | 4.05  | 4.02  | 2.32   | 1.39  | 1.89  | 2.07   | 2.73   | 0.26   | 1.45  | 0.04  | 1.12   | 2.28  | 1.47  | 0.73   | 1.05   | 2.72   | 0.54  | 1.17   | 1.07   | 0.44   | 3.96   | 2.53   |
| 0.09   | -0.96  | 0.91   | 5.79  | 1.86   | 8.43   | 6.79  | 13.81 | 10.94  | 11.36 | 7.61  | 8.06   | 13.19  | 14.04  | -0.57 | -0.59 | 1.72   | 2.75  | -0.17 | -0.52  | 2.23   | -0.31  | 3.17  | 3.61   | 5.74   | 6.45   | 5.07   | 4.16   |
| -7.97  | -19.79 | -2.89  | 5.41  | -0.85  | 16.37  | 13.22 | 31.22 | 25.25  | 28.47 | 18.98 | 19.43  | 32.51  | 27.19  | 0.62  | -0.02 | 2.58   | 5.15  | -4.89 | 4.04   | 2.53   | 2.88   | 3.06  | 5.63   | 8.75   | 11.46  | 6.90   | 3.41   |
| -5.65  | -13.57 | -4.06  | -5.50 | -1.94  | -12.17 | -8.75 | -8.61 | -10.49 | -8.81 | -5.12 | -10.92 | -12.17 | -13.44 | 1.91  | 3.35  | 1.85   | 4.80  | -5.50 | 3.25   | 5.37   | 3.59   | -1.48 | -3.23  | -5.12  | 1.26   | 5.04   | -5.18  |
| -11.01 | -20.13 | -7.58  | -5.96 | -3.13  | 0.83   | 1.76  | 2.26  | 0.64   | 4.20  | 2.19  | 2.33   | 2.20   | 0.94   | 5.61  | 4.58  | 7.52   | 7.77  | 10.59 | 6.20   | 6.43   | 4.70   | 3.67  | 4.73   | 8.20   | 2.79   | 6.79   | 3.70   |
| -3.92  | -2.73  | -4.34  | -8.65 | 0.51   | -2.07  | 0.06  | -1.12 | -1.05  | 0.50  | 0.27  | -2.21  | -0.23  | -0.13  | 0.61  | -1.50 | 1.02   | 1.57  | -0.43 | 2.92   | 0.80   | -0.88  | 0.29  | 1.20   | 0.43   | -7.12  | -1.06  | -0.10  |
| 0.28   | 1.61   | -0.09  | -1.34 | 0.29   | -1.58  | -1.37 | -0.81 | -1.46  | -0.60 | 0.52  | -4.25  | -2.81  | -0.87  | -0.22 | 0.04  | -0.73  | -0.11 | -0.06 | 1.55   | -0.62  | -0.17  | 0.70  | -2.30  | 0.16   | 1.26   | -4.09  | 0.22   |
| 3.08   | 4.35   | 3.84   | 2.66  | 2.78   | -0.97  | 1.57  | 0.00  | -1.01  | 0.15  | 0.88  | -0.43  | 0.08   | 0.92   | 1.26  | 3.55  | 3.99   | 3.39  | 1.89  | 2.05   | 2.83   | 2.46   | 2.95  | 3.81   | 3.40   | 2.55   | 3.39   | 2.28   |
| -1.28  | -2.59  | -1.38  | -0.56 | -0.74  | -2.72  | -0.56 | -1.80 | -2.18  | -0.05 | -0.95 | -1.74  | 0.17   | -1.17  | 0.41  | -1.41 | -0.16  | -0.12 | 0.58  | 0.17   | -0.39  | -0.62  | -1.14 | 0.24   | -0.99  | -0.26  | -0.46  | -1.07  |
| 3.36   | 2.35   | 1.56   | 2.00  | 2.06   | -0.15  | 1.08  | -0.52 | -2.23  | 0.37  | 2.24  | -1.41  | -0.96  | -0.31  | 4.29  | 3.10  | 4.05   | 2.57  | 2.77  | 2.56   | 2.60   | 4.26   | 3.30  | 2.86   | 3.03   | 1.79   | 3.57   | 4.18   |
| -2.30  | -2.61  | -3.06  | -1.16 | -0.76  | 0.19   | -0.14 | 0.39  | 0.72   | 1.25  | 0.17  | 0.02   | 1.34   | 0.57   | -2.21 | -1.01 | -1.09  | -3.08 | -0.13 | -1.67  | -0.84  | -2.93  | -4.39 | -4.26  | -4.11  | -2.12  | -5.04  | -3.96  |
| 0.04   | -1.49  | -1.93  | -0.14 | -0.08  | -0.78  | -0.21 | 2.57  | 0.23   | 1.07  | 0.31  | 0.39   | 1.01   | 0.67   | -0.86 | -0.50 | -0.94  | -0.53 | -1.51 | 0.09   | -0.66  | -0.41  | -3.86 | -2.72  | -1.76  | -1.62  | -2.59  | -2.26  |
| 0.75   | 0.03   | 0.21   | 2.54  | -0.10  | -1.46  | -0.68 | -0.30 | -2.03  | -0.37 | 0.18  | -0.88  | 1.22   | 0.58   | -0.93 | -0.91 | 0.86   | 0.49  | -1.21 | 0.37   | 0.21   | 0.84   | -0.21 | 0.44   | -0.06  | -0.17  | 0.95   | -0.07  |
| 1.38   | 4.63   | 3.65   | 1.26  | 2.53   | -1.70  | 1.29  | 2.03  | -0.77  | 0.90  | 0.83  | -0.92  | -0.02  | -1.24  | 4.21  | 3.21  | 3.74   | 2.03  | 0.76  | 4.38   | 2.83   | 3.99   | 2.85  | 3.33   | 3.52   | 3.91   | 3.16   | 3.43   |
| 4.03   | 5.26   | 4.19   | 2.85  | 2.76   | -0.26  | 0.00  | -0.16 | 1.14   | -0.25 | 0.36  | 0.21   | -0.40  | 0.47   | 1.79  | 1.68  | 1.15   | 2.23  | 1.24  | 1.95   | 2.51   | 1.68   | 1.58  | 1.44   | 1.93   | 1.99   | 2.95   | 1.54   |
| -0.07  | -1.53  | 1.25   | 1.67  | 0.80   | -0.17  | 1.60  | 0.94  | 0.96   | 1.62  | 1.54  | -0.01  | 1.77   | 0.97   | 0.87  | 1.68  | 2.72   | 1.72  | 1.26  | 1.81   | 1.09   | 0.82   | 1.44  | 0.47   | 1.56   | 0.77   | 2.01   | 1.96   |
| -0.80  | -6.62  | 4.97   | -0.12 | 0.03   | 4.38   | 5.29  | 6.58  | 3.63   | 8.57  | 5.41  | 3.47   | 7.39   | 6.14   | 2.27  | 5.09  | 4.19   | 2.22  | 2.06  | 3.99   | 4.59   | 4.14   | 4.45  | 4.48   | 4.56   | 4.55   | 1.96   | 2.69   |
| -4.12  | -17.49 | -9.37  | -0.77 | -2.75  | 7.66   | 9.49  | 11.50 | 6.82   | 13.34 | 8.83  | 6.84   | 13.40  | 10.87  | 7.62  | 7.19  | 7.34   | 5.90  | 6.06  | 7.49   | 5.57   | 7.38   | 6.83  | 7.85   | 8.50   | 7.44   | 2.39   | 4.76   |
| -4.59  | -6.86  | -5.05  | -1.64 | -2.08  | -5.17  | -3.47 | -4.19 | -4.57  | -5.10 | -3.02 | -2.93  | -4.12  | -5.23  | 0.60  | -3.37 | -1.52  | -0.81 | -2.82 | -0.74  | 0.56   | -2.00  | 0.60  | -1.70  | -2.23  | -0.85  | -2.82  | 0.11   |
| -8.26  | -8.47  | -4.94  | -1.25 | -2.82  | 0.75   | 1.54  | 0.00  | 0.19   | 1.44  | 0.73  | 0.30   | 1.36   | 0.67   | 1.31  | 0.00  | 0.68   | 1.02  | -1.10 | -0.24  | 1.16   | -0.06  | -0.17 | 1.79   | 0.91   | 0.66   | 0.66   | 1.65   |
| -9.78  | -9.47  | -5.95  | -0.72 | -4.41  | 2.05   | 1.84  | 2.61  | 2.39   | 3.69  | 2.22  | 2.75   | 4.51   | 3.16   | 1.26  | -0.53 | 1.30   | 1.56  | 0.49  | 1.56   | 1.28   | 0.11   | 0.11  | 0.71   | 3.46   | 1.94   | 1.26   | 0.41   |
| -5.21  | -8.64  | -5.52  | -3.77 | -3.88  | -6.31  | -4.81 | 5.88  | -6.86  | -3.60 | -5.78 | -6.35  | -7.69  | -8.29  | 2.18  | 0.16  | 1.61   | 1.49  | -0.64 | 1.23   | 2.59   | -0.52  | 0.83  | -1.89  | 0.02   | -1.82  | -3.40  | -1.72  |
| 1.42   | 2.76   | 0.28   | 2.25  | -0.06  | -1.66  | 0.30  | 0.48  | -1.55  | 1.29  | -0.29 | -1.92  | 0.09   | -1.52  | 0.54  | 0.66  | 0.69   | 0.83  | -0.94 | 0.79   | 0.66   | 0.00   | -0.36 | 1.14   | 1.18   | 0.97   | 2.09   | 1.34   |
| 1.20   | 0.42   | 0.46   | -0.14 | 0.73   | -2.21  | -0.61 | -1.34 | -1.61  | -1.31 | -0.26 | -1.48  | -0.20  | -0.77  | 0.15  | -0.94 | 0.50   | 0.73  | -0.69 | -0.11  | 0.84   | 0.81   | -0.21 | 0.24   | 1.03   | 0.28   | -0.61  | -0.06  |
| 1.42   | 0.93   | 0.84   | 0.88  | 0.92   | -1.03  | -0.50 | 0.65  | -2.54  | -0.08 | -1.19 | -1.72  | 0.37   | -0.98  | 0.23  | 1.01  | 0.69   | 0.30  | 0.07  | 3.39   | 0.83   | -0.29  | 0.99  | -0.07  | 1.15   | 0.31   | -0.20  | 1.75   |
| 1.42   | 2.37   | 0.96   | 0.59  | -0.79  | -2.90  | -1.19 | -0.99 | -2.13  | -0.95 | -1.67 | -2.15  | -0.65  | -0.09  | 0.21  | 1.48  | 1.73   | -0.41 | 1.70  | -0.20  | 1.30   | 1.28   | -9.87 | -10.78 | -11.92 | -10.70 | -4.69  | -8.06  |
| 0.39   | 1.13   | 1.24   | 0.31  | 1.48   | -1.71  | -1.25 | -1.70 | -2.64  | -0.87 | -0.99 | -2.31  | -1.63  | -1.86  | 1.95  | 0.85  | 1.72   | 1.79  | 0.43  | 2.68   | 0.95   | 0.50   | -0.28 | 0.06   | 2.49   | 1.66   | 0.01   | -0.12  |
| 1.67   | 2.70   | 2.71   | 1.40  | -0.03  | -6.07  | -3.88 | -4.73 | -6.18  | -3.29 | -3.44 | -3.90  | -3.43  | -4.11  | 2.14  | 2.11  | 3.19   | 2.28  | 0.90  | 1.54   | 1.57   | 1.80   | 6.53  | 7.06   | 4.31   | 4.66   | 9.35   | 2.82   |
| 1.52   | 2.29   | 3.31   | 2.22  | 0.96   | -0.49  | 1.34  | 1.31  | -0.22  | 1.70  | 2.68  | 1.01   | 1.80   | 3.05   | 1.14  | 1.17  | 1.72   | 2.20  | 2.06  | 2.40   | 2.70   | 1.09   | 0.20  | 1.62   | 0.86   | 1.40   | 1.65   | 3.13   |
| 0.86   | 1.59   | 1.87   | 1.25  | 1.99   | -0.37  | 0.63  | 0.79  | 0.32   | 0.42  | 0.89  | -0.37  | 0.33   | 1.00   | 1.41  | 1.24  | 1.23   | 1.68  | 1.45  | 1.83   | 1.17   | 2.08   | 2.23  | 1.29   | 2.66   | 1.92   | 2.28   | 1.79   |
| 1.35   | 2.91   | 1.61   | 3.28  | 1.26   | -1.38  | 1.18  | 0.46  | -0.62  | 0.49  | 0.48  | -0.04  | 0.37   | 1.10   | 1.12  | 0.86  | 2.31   | 1.67  | 0.97  | 0.51   | 2.46   | 0.65   | 1.09  | 1.19   | 1.88   | 1.30   | 2.05   | 1.13   |
| -3.16  | -2.79  | -2.61  | -1.19 | -1.42  | -1.54  | -0.48 | 0.19  | -0.34  | 1.73  | 1.40  | -1.24  | -0.82  | -0.38  | 1.09  | 0.51  | 0.06   | 1.21  | 0.07  | 1.06   | 0.65   | 2.50   | -0.14 | -2.41  | -0.98  | 1.45   | 0.97   | 0.59   |
| -1.92  | 1.80   | -0.01  | -0.03 | -0.10  | -0.28  | 0.34  | -2.54 | -0.93  | -0.68 | -0.65 | -1.70  | -1.71  | 1.55   | 0.17  | 0.95  | 0.70   | 0.18  | 0.73  | 1.31   | -0.13  | -0.58  | -0.44 | 0.73   | 0.14   | 0.48   | 0.51   |        |
| 1.52   | 5.89   | 0.37   | 1.27  | 1.67   | -1.03  | 0.70  | 0.03  | -1.05  | 1.15  | 1.58  | -0.23  | 2.11   | -0.71  | 0.22  | 0.87  | -0.01  | 1.54  | 1.57  | 1.49   | 1.71   | 0.59   | 1.95  | 1.30   | 2.50   | 0.88   | 2.60   | 2.01   |
| 0.43   | 2.80   | 1.68   | 3.04  | 2.68   | -5.94  | -3.25 | -2.96 | -5.37  | -4.88 | -3.11 | -1.58  | -4.18  | -4.16  | 1.80  | 2.66  | 2.38   | 2.78  | 1.89  | 0.70   | 2.58   | 3.02   | 1.31  | 0.46   | 0.98   | 1.72   | 1.71   | 1.25   |
| 2.14   | 3.46   | 1.51   | 1.60  | 1.11   | 0.46   | 0.65  | 1.99  | 1.12   | 1.58  | 1.38  | 1.03   | 0.52   | 0.97   | 0.89  | -0.20 | 1.26   | 0.61  | 0.37  | 1.19   | 0.85   | 1.10   | -0.18 | -0.39  | -0.19  | 1.57   | 0.04   | 1.09   |
| -1.26  | 0.57   | 0.22   | 1.21  | 0.66   | -0.60  | -1.53 | 0.79  | -0.63  | 0.26  | 0.33  | 0.37   | -0.89  | 0.73   | -0.12 | -0.18 | 0.39   | 0.62  | -0.19 | -0.58  | 0.20   | -0.62  | -0.18 | 0.05   | 0.32   | -0.45  | 0.00   | 0.01   |
| -3.48  | -6.78  | -1.97  | -1.16 | -4.96  | 1.21   | 0.05  | 1.41  | 0.93   | 2.97  | 2.13  | 0.72   | 5.08   | 1.50   | 0.10  | -0.81 | -1.52  | -0.84 | 1.14  | 0.07   | 0.41   | -0.39  | 1.92  | 1.39   | 1.58   | 1.39   | -0.81  | 1.09   |
| -4.86  | -5.25  | -2.21  | 1.29  | -7.89  | 2.74   | 1.72  | 3.24  | 1.81   | 4.37  | 3.46  | 1.81   | 5.26   | 2.83   | 0.56  | 0.36  | 0.81   | 0.04  | -1.21 | 0.06   | -0.44  | 1.24   | 1.68  | 0.60   | 1.58   | 1.08   | -0.98  | -0.11  |
| -3.47  | -12.19 | -6.19  | -5.14 | -4.45  | -8.04  | -6.26 | -5.39 | -7.41  | -9.29 | -6.48 | -8.67  | -11.81 | -7.68  | 2.12  | 0.79  | -1.32  | -0.45 | -1.37 | -0.98  | 2.72   | 0.88   | 0.17  | -1.56  | -2.64  | -1.50  | -6.64  | -2.87  |
| 1.87   | 3.08   | 1.60   | 1.60  | 0.66   | -4.81  | -3.45 | -3.17 | -3.48  | -4.78 | -2.22 | -4.96  | -3.79  | -3.30  | 3.80  | 2.22  | 3.79   | 3.13  | 2.70  | 2.30   | 4.06   | 2.68   | 1.62  | 1.85   | 2.88   | 2.00   | 1.67   | 2.56   |
| 3.63   | 7.30   | 2.73   | 2.93  | 2.32   | -10.10 | -4.73 | -4.72 | -9.47  | -5.34 | -3.75 | -10.11 | -7.01  | -6.97  | 5.36  | 4.79  | 4.50   | 5.54  | 3.91  | 4.97   | 6.21   | 4.97   | 2.49  | 2.12   | 3.04   | 2.13   | 2.47   | 2.19   |
| 0.93   | -3.96  | -0.02  | 0.62  | -1.44  | 1.08   | -1.57 | 0.52  | -0.11  | -0.71 | 0.01  | 0.50   | -1.91  | -1.24  | 0.43  | 0.83  | 1.50   | 1.59  | 4.61  | 2.37   | 1.26   | 0.13   | -0.71 | 1.55   | 0.58   | 1.92   | 1.88   | 2.38   |
| -10.83 | -10.69 | -12.73 | -9.20 | -10.08 | -7.15  | -5.23 | -5.81 | -6.85  | -4.77 | -5.02 | -5.70  | -7.73  | -4.54  | -7.20 | -8.36 | -12.03 | -9.52 | -9.24 | -12.22 | -10.50 | -13.10 | -7.79 | -9.78  | -12.47 | -9.99  | -11.52 | -12.45 |
| 0.45   | 1.14   | 1.70   | 0.12  | 0.71   | -0.70  | 0.37  | 0.70  | -0.44  | 1.10  | 0.38  | -0.78  | -0.32  | -0.03  | 0.99  | 0.72  | 1.54   | 1.26  | 1.30  | 2.15   | 0.86   | 1.83   | 0.40  | 1.31   | 1.37   | 2.15   | 1.29   | 0.99   |
| 0.25   | 0.60   | -0.73  | 1.21  | 1.26   | -2.37  | -1.48 | -2.04 | -2.62  | -2.12 | -2.90 | -3.69  | -3.00  | -1.34  | 0.06  | 0.55  | 3.04   | -0.03 | 2.25  | 1.02   | 2.68   | 1.94   | 0.64  | 1.03   | 0.60   |        |        |        |

|        |        |        |        |        |        |        |        |        |        |        |        |        |        |       |        |        |        |        |        |        |        |        |        |        |        |        |        |
|--------|--------|--------|--------|--------|--------|--------|--------|--------|--------|--------|--------|--------|--------|-------|--------|--------|--------|--------|--------|--------|--------|--------|--------|--------|--------|--------|--------|
| 2.45   | 0.60   | 2.62   | 12.14  | -2.21  | 14.86  | 11.83  | 20.02  | 17.24  | 17.98  | 11.74  | 14.41  | 20.11  | 19.13  | -0.16 | -0.15  | 4.25   | 3.54   | 1.52   | 0.26   | 2.35   | 0.45   | 4.17   | 5.59   | 9.32   | 7.42   | 8.46   | 7.11   |
| -5.37  | -18.42 | 0.53   | 16.88  | -0.89  | 32.25  | 25.92  | 47.69  | 40.37  | 42.29  | 29.65  | 34.34  | 46.16  | 38.96  | 4.03  | 1.89   | 5.97   | 8.34   | -1.28  | 6.86   | 4.54   | 3.16   | 7.31   | 8.57   | 12.62  | 13.86  | 11.93  | 7.59   |
| -8.24  | -18.25 | -5.67  | -8.96  | -4.77  | -18.00 | -12.25 | -13.29 | -16.80 | -12.14 | -10.23 | -14.17 | -16.43 | -15.38 | 0.87  | 1.13   | 0.54   | 3.08   | -5.55  | 2.43   | 4.88   | 0.78   | -1.99  | -5.81  | -6.52  | -1.59  | -7.70  | -6.69  |
| -7.68  | -18.14 | -4.05  | -2.11  | -1.41  | 0.80   | 2.52   | 1.68   | 0.73   | 3.76   | 2.56   | 1.84   | 3.79   | 0.99   | 8.31  | 5.33   | 11.45  | 11.70  | 16.41  | 9.63   | 8.93   | 9.99   | 6.00   | -6.73  | 12.72  | 7.20   | 12.43  | 8.33   |
| -2.36  | -3.25  | -4.00  | -7.93  | 1.25   | -1.83  | -0.19  | -1.63  | -1.40  | -0.32  | -0.05  | -2.00  | -1.23  | 0.17   | 1.00  | -0.12  | 2.37   | 2.79   | 0.68   | 3.79   | 1.66   | -0.06  | 0.31   | 0.37   | 0.63   | -6.86  | 0.48   | -0.53  |
| 0.19   | 1.43   | 1.01   | -1.78  | 0.80   | -2.54  | -0.95  | -1.51  | -0.73  | -2.10  | -1.34  | -5.36  | -3.37  | -1.22  | -0.71 | -0.73  | -0.38  | 0.19   | 0.23   | 1.75   | -1.11  | -0.34  | -0.38  | -2.39  | -0.11  | 1.15   | -0.32  | 0.32   |
| 2.61   | 4.24   | 3.83   | 2.38   | 3.61   | -1.72  | 2.03   | -2.05  | -2.01  | 0.77   | 0.59   | -1.13  | 0.97   | 0.66   | 1.82  | 4.12   | 4.31   | 3.42   | 1.33   | 1.75   | 3.79   | 1.95   | 2.78   | 2.48   | 3.45   | 2.11   | 3.09   | 1.20   |
| -0.60  | -2.99  | -0.36  | -1.58  | -1.29  | -2.30  | -0.56  | -1.84  | -1.88  | 0.09   | -0.77  | -1.59  | -0.46  | -1.08  | 0.03  | -1.02  | 0.20   | -0.04  | 0.37   | 0.13   | -0.39  | -0.03  | -1.46  | 0.15   | -0.72  | -0.54  | -0.10  | -0.62  |
| 3.22   | 1.86   | 0.83   | 1.31   | 4.08   | 0.23   | 0.53   | -1.62  | -2.41  | 0.83   | 0.57   | -2.46  | 0.61   | -0.68  | 4.12  | 3.62   | 4.17   | 2.58   | 2.70   | 2.81   | 2.68   | 2.68   | 3.58   | 2.01   | 3.08   | 1.92   | 3.00   | 3.81   |
| -1.55  | -3.78  | -3.12  | -1.05  | -0.98  | 1.79   | 1.22   | 3.59   | 1.97   | 2.68   | 0.66   | 1.53   | 2.51   | 0.98   | -2.87 | -1.12  | -1.17  | -3.54  | -0.82  | -0.58  | -0.50  | -3.20  | -5.85  | -4.29  | -3.43  | -2.08  | -4.63  | -4.24  |
| -0.12  | -2.35  | -1.87  | -0.52  | -0.12  | 0.93   | 1.06   | 3.21   | 1.62   | 2.27   | 2.62   | 2.23   | 2.08   | 1.58   | -0.44 | -0.60  | -0.95  | 0.12   | -0.52  | -0.73  | -0.13  | -0.46  | -3.72  | -2.71  | -2.41  | -2.26  | -2.90  | -2.26  |
| 1.02   | -0.86  | -1.54  | 2.23   | 1.09   | -1.40  | 1.55   | 0.63   | -0.93  | 0.75   | 0.47   | -0.10  | 1.77   | 0.03   | -1.11 | -0.88  | 0.37   | -0.51  | -0.75  | 0.77   | 0.10   | 0.55   | -1.50  | 0.06   | -0.38  | 0.32   | 1.72   | 0.17   |
| 2.21   | 4.41   | 4.62   | 2.48   | 2.75   | -1.31  | 0.85   | 1.71   | -0.26  | 0.96   | 1.00   | -0.63  | 0.72   | -0.43  | 3.42  | 4.18   | 5.17   | 2.67   | 2.02   | 5.03   | 3.26   | 4.87   | 2.47   | 3.75   | 4.45   | 3.26   | 3.22   | 3.84   |
| 3.75   | 4.77   | 3.57   | 1.34   | 3.23   | -0.75  | 0.09   | -0.52  | 0.33   | -0.66  | -0.92  | -0.27  | -1.47  | -1.18  | 1.74  | 1.43   | 1.03   | 1.99   | 0.71   | 2.30   | 2.40   | 1.60   | 1.97   | 1.43   | 1.42   | 1.48   | 3.34   | 2.24   |
| 0.19   | -1.71  | 1.83   | 2.57   | 0.68   | 0.19   | 0.98   | 1.51   | 1.52   | 2.23   | 1.25   | 0.85   | 1.64   | 1.80   | 1.66  | 2.21   | 2.82   | 1.68   | 1.01   | 2.07   | 1.83   | 1.70   | 2.10   | 1.16   | 2.20   | 0.86   | 2.30   | 1.97   |
| -1.52  | -6.34  | -3.45  | 3.45   | 0.43   | 4.54   | 8.38   | 8.33   | 6.12   | 10.91  | 8.24   | 5.05   | 9.32   | 7.98   | 4.69  | 6.70   | 6.87   | 4.24   | 6.26   | 6.48   | 6.18   | 6.26   | 5.56   | 8.07   | 6.72   | 5.69   | 3.63   | 3.65   |
| -3.23  | -18.00 | -8.26  | 0.84   | -1.33  | 10.88  | 14.41  | 15.41  | 10.21  | 18.36  | 13.56  | 10.46  | 16.23  | 12.68  | 11.08 | 12.14  | 10.91  | 10.20  | 10.99  | 11.47  | 9.94   | 11.32  | 10.70  | 12.97  | 12.72  | 10.66  | 5.67   | 8.21   |
| -5.63  | -8.53  | -6.00  | -2.94  | -3.26  | -5.05  | -5.63  | -5.19  | -5.64  | -5.52  | -4.79  | -4.68  | -5.19  | -4.42  | -0.39 | -5.38  | -2.05  | -0.69  | -3.41  | -0.88  | -0.27  | -1.74  | -1.59  | -4.39  | -3.49  | -1.09  | -1.69  | -1.57  |
| -8.90  | -8.61  | -4.53  | -1.01  | -3.02  | 1.46   | 2.83   | 1.01   | 1.17   | 3.14   | 1.51   | 0.61   | 2.94   | 2.15   | 1.74  | 0.42   | 1.15   | 1.12   | -1.14  | 0.65   | -1.78  | 0.20   | 0.08   | 0.47   | 3.29   | 1.57   | 0.97   | 1.29   |
| -9.79  | -10.89 | -4.87  | -0.69  | -4.41  | 4.81   | 4.19   | 6.37   | 3.37   | 8.32   | 4.32   | 5.04   | 10.29  | 6.20   | 1.62  | 3.00   | 1.26   | 1.64   | 1.04   | 1.43   | 1.47   | 0.39   | -0.02  | 1.72   | 3.35   | 2.66   | 1.64   | 1.17   |
| -6.43  | -11.61 | -5.78  | -6.07  | -1.57  | -14.14 | -9.29  | -13.80 | -10.69 | -12.85 | -10.58 | -12.42 | -19.01 | -14.40 | 3.38  | -1.56  | 0.60   | -0.09  | -0.11  | 1.74   | 2.03   | -0.46  | 1.49   | -1.56  | -1.39  | -2.43  | -3.66  | -1.54  |
| 0.86   | 2.37   | 0.88   | 0.86   | 0.32   | -2.63  | 0.10   | -0.51  | -1.40  | 1.22   | -0.01  | -2.00  | -0.50  | -0.80  | 1.49  | -0.09  | 0.93   | 1.84   | -0.29  | 2.01   | 0.68   | 0.69   | -1.26  | 0.81   | 0.47   | 0.17   | -2.68  | 0.23   |
| 1.01   | -0.13  | 0.80   | -0.28  | 0.38   | -1.88  | -0.61  | -1.90  | -1.80  | -1.04  | -0.55  | -1.26  | -0.44  | -0.63  | -0.04 | -0.26  | 0.66   | 0.03   | -0.38  | 0.33   | 0.51   | 1.12   | -0.30  | 0.17   | 0.77   | 0.13   | -0.72  | 0.30   |
| 1.01   | 1.74   | 1.63   | 0.74   | 0.73   | -1.56  | -0.17  | -1.12  | -2.36  | -0.20  | 0.34   | -1.61  | -0.31  | -0.76  | 0.16  | 1.70   | 0.81   | 2.12   | 0.12   | 0.99   | 1.34   | 1.00   | 0.67   | 0.80   | 0.64   | 0.26   | 0.86   | 0.37   |
| 0.44   | 1.93   | -0.37  | 0.17   | -1.20  | -2.54  | -1.26  | -1.30  | -1.86  | -0.71  | -1.71  | -2.39  | -0.57  | -0.52  | 0.69  | 2.37   | 2.54   | -0.16  | 1.72   | 1.65   | 1.97   | 0.78   | -11.73 | -11.90 | -12.48 | -11.68 | -5.70  | -10.14 |
| 0.82   | 0.84   | 1.26   | 0.08   | 1.25   | -1.91  | -1.22  | -2.49  | -3.88  | -0.50  | -0.90  | -2.55  | -2.01  | -2.11  | 1.44  | 0.92   | 1.49   | 2.42   | 2.18   | 1.68   | 1.19   | 0.38   | 0.07   | 2.64   | 1.75   | 0.74   | -0.38  |        |
| 0.41   | 1.78   | 1.72   | 1.14   | 0.22   | -5.71  | -4.81  | -5.20  | -5.04  | -5.41  | -4.70  | -5.18  | -4.43  | -4.41  | 2.83  | 2.29   | 2.12   | 2.12   | 3.13   | 2.76   | 2.89   | 1.57   | 6.86   | 7.67   | 4.85   | 4.43   | 9.57   | 4.91   |
| 1.10   | 3.34   | 3.52   | 3.17   | 1.54   | -0.66  | 0.81   | 1.24   | -0.79  | 1.51   | 2.49   | 0.12   | 0.37   | 0.09   | 1.40  | 2.63   | 2.61   | 2.13   | 2.79   | 2.41   | 2.94   | 1.58   | 0.31   | 1.94   | 1.66   | 1.99   | 2.55   | 2.90   |
| 1.02   | 1.50   | 1.94   | 1.17   | 1.70   | 0.70   | 0.66   | 0.86   | 0.18   | 0.13   | 0.64   | -0.17  | 0.16   | 1.09   | 1.38  | 0.70   | 1.64   | 1.62   | 1.77   | 2.25   | 1.87   | 2.71   | 2.48   | 1.78   | 2.20   | 2.02   | 1.92   | 1.96   |
| 0.59   | 2.97   | 0.51   | 2.39   | 1.97   | -1.43  | 0.74   | 0.15   | -1.29  | 1.95   | 0.28   | -0.68  | 0.50   | -1.22  | 1.38  | 1.07   | 2.90   | 2.84   | 0.86   | 0.80   | 3.02   | -0.15  | 1.21   | 1.41   | 1.14   | 1.34   | 2.17   | 1.58   |
| -4.28  | -5.49  | -2.77  | -2.52  | -0.77  | -1.67  | -0.68  | -0.37  | -0.18  | 1.45   | 0.55   | -1.93  | -0.79  | -0.65  | 0.52  | -0.03  | 0.54   | 1.95   | 0.28   | 0.64   | 0.65   | 2.33   | -0.28  | -2.42  | -0.16  | 0.83   | 1.27   | 0.54   |
| -2.05  | -1.01  | -0.23  | -1.01  | -0.30  | -2.75  | -0.54  | -0.38  | -2.67  | -1.22  | -1.58  | -1.30  | -1.52  | -2.25  | 1.56  | 0.12   | 0.61   | 0.50   | 0.21   | 0.87   | 1.11   | 0.12   | -0.37  | -0.57  | 0.22   | -0.06  | 0.00   | 0.47   |
| 1.37   | 4.92   | 0.04   | 0.57   | 1.91   | -0.42  | 1.35   | -0.49  | 0.51   | 0.88   | 1.10   | 0.09   | -0.13  | 0.44   | 0.23  | -0.24  | 0.98   | 1.56   | 0.23   | 2.01   | 2.04   | 0.95   | 1.48   | 1.11   | 1.52   | -0.17  | 2.44   | 1.08   |
| -0.05  | 2.36   | 0.33   | -0.28  | 2.75   | -7.40  | -4.46  | -5.19  | -6.00  | -5.84  | -5.09  | -7.14  | -6.01  | -5.87  | 1.28  | 1.36   | 2.81   | 2.08   | 2.22   | 0.65   | 2.82   | 2.50   | 0.98   | -1.41  | 0.52   | 1.57   | 0.95   | 1.46   |
| 2.48   | 3.43   | 0.96   | 1.30   | 1.12   | 0.69   | 0.69   | -2.27  | 1.95   | 2.31   | 1.43   | 1.05   | 0.77   | 1.13   | 0.95  | 0.46   | 0.93   | 1.67   | 0.38   | 1.79   | 1.53   | 1.07   | 0.26   | 0.52   | 0.37   | 1.74   | 0.46   | 1.23   |
| -1.33  | 0.91   | 0.18   | 2.12   | 1.23   | -0.63  | -1.00  | 0.93   | -0.41  | 0.82   | 0.65   | 1.13   | 1.93   | -0.24  | -0.32 | -0.43  | 1.46   | 0.42   | 0.66   | -0.41  | 0.86   | 0.54   | -0.30  | 0.04   | 0.45   | 0.39   | 1.28   | 0.56   |
| -4.02  | -7.73  | -0.67  | -1.59  | -4.63  | 3.58   | 3.54   | 5.34   | 2.01   | 6.82   | 5.30   | 2.20   | 11.35  | 5.21   | -0.35 | -0.71  | -0.53  | -0.48  | 0.66   | 1.61   | -0.26  | -0.17  | 1.45   | 1.21   | 1.52   | 2.50   | -0.94  | 2.19   |
| -5.73  | -6.27  | -1.25  | 0.55   | -7.82  | 6.23   | 5.41   | 6.68   | 3.62   | 10.13  | 6.60   | 4.36   | 13.48  | 7.55   | -0.13 | 0.88   | 0.67   | 0.06   | -0.59  | -0.06  | -0.16  | 1.63   | 2.25   | 1.00   | 2.08   | 0.40   | -0.32  | 0.77   |
| -4.15  | -12.70 | -6.21  | -7.54  | -4.77  | -17.61 | -14.08 | -15.62 | -14.17 | -19.92 | -14.05 | -15.22 | -26.46 | -17.43 | 1.84  | -0.84  | -1.53  | -0.32  | -2.25  | -0.70  | 0.82   | 0.06   | -0.37  | -1.99  | -3.81  | -4.09  | -7.77  | -2.39  |
| 1.81   | 2.79   | 1.47   | 1.05   | -0.98  | -8.44  | -5.72  | -4.63  | -5.78  | -7.68  | -4.43  | -1.88  | -8.59  | -6.57  | 3.49  | 2.35   | 3.97   | 3.98   | 2.50   | 2.80   | 2.96   | 2.89   | 1.97   | 1.85   | 2.84   | 1.30   | 1.09   | 1.23   |
| 3.13   | 6.61   | 2.19   | 1.77   | 2.03   | -15.74 | -10.43 | -10.11 | -12.75 | -11.54 | -7.05  | -14.65 | -14.29 | -12.86 | 5.73  | 4.58   | 5.35   | 5.77   | 3.93   | 5.14   | 5.60   | 4.63   | 2.18   | 1.98   | 1.65   | 2.11   | 1.94   | 1.57   |
| -0.04  | -4.71  | 0.46   | 0.38   | -1.30  | -0.42  | -3.78  | -1.46  | -1.88  | -1.30  | -0.65  | -0.19  | -3.35  | -2.39  | -0.88 | 0.39   | 1.01   | 2.10   | 4.45   | 1.26   | 0.71   | 0.59   | -1.28  | 1.52   | 2.00   | 0.50   | 2.19   | 1.76   |
| -13.06 | -12.25 | -15.28 | -11.35 | -13.61 | -9.50  | -5.41  | -7.37  | -7.44  | -6.58  | -6.30  | -6.29  | -4.71  | -4.97  | -9.52 | -10.25 | -13.33 | -11.21 | -11.15 | -13.90 | -12.59 | -14.66 | -11.01 | -12.21 | -14.50 | -12.34 | -13.23 | -15.15 |
| 1.17   | 0.23   | 2.23   | 0.82   | 1.36   | -0.54  | -0.11  | 1.16   | -0.57  | 0.56   | 0.68   | -0.96  | -0.12  | 0.31   | 1.45  | 1.13   | 1.99   | 2.26   | 1.44   | 2.31   | 1.43   | 2.05   | 0.75   | 1.28   | 1.01   | 2.00   | 1.43   | 1.32   |
| 0.39   | 1.48   | -0.69  | 1.39   | 2.64   | -3.03  | -2.27  | -4.11  | -3.12  | -0.83  | -2.49  | -2.47  | -0.85  | -1.31  | 0.16  | 1.94   | 2.59   | -0.05  | 3.52   | 2.06   | 4.43   | 2.03   | 0.25   | 0.72   | 1.94   | 0.44   | 0.95   | -0.25  |
| -0.52  | -1.37  | 0.75   | -0.51  | 0.49   | -1.09  | -1.11  | 0.69   | -1.22  | -0.42  | 0.88   | -2.19  | 0.33   | 0.50   | -1.13 | -1.24  | -1.21  | -0.08  | -2.01  | 0.66   | -0.07  | -1.18  | -1.93  | -1.13  | -0.76  | -0.34  | -0.77  | -0.52  |
| -0.92  | -0.70  | -0.93  | 0.14   | -1.16  | -1.65  | -0.27  | 0.32   | 0.92   | 1.27   | 0.96   | -0.04  | 0.45   | 0.24   | -0.99 | -0.65  | -0.51  | -1.53  | 0.26   | -0.76  | 0.02   | -0.61  | -0.89  | -1.04  | -1.86  | -1.63  | -0.64  | -0.81  |
| 0.07   | 2.00   | 0.72   | -0.09  | 0.44   | -0.15  | -0.53  | 0.98   | 0.83   | -0.38  | 0.42   | 0.29   | 0.12   | 0.68   | 1.36  | 0.76   | 1.08   |        |        |        |        |        |        |        |        |        |        |        |

|        |        |        |        |        |        |        |        |        |        |        |        |        |        |        |        |        |        |        |        |        |        |        |        |        |        |        |        |
|--------|--------|--------|--------|--------|--------|--------|--------|--------|--------|--------|--------|--------|--------|--------|--------|--------|--------|--------|--------|--------|--------|--------|--------|--------|--------|--------|--------|
| -4.85  | -13.88 | -0.35  | 2.31   | 2.94   | 1.11   | 3.20   | 0.53   | 1.32   | 4.26   | 2.97   | 1.93   | 3.40   | -0.19  | 10.93  | 7.35   | 13.57  | 17.37  | 22.47  | 13.84  | 11.90  | 12.50  | 9.02   | 9.42   | 17.31  | 11.10  | 19.32  | 12.43  |
| -2.08  | -1.22  | -3.15  | -7.52  | 1.96   | -1.52  | -0.06  | -2.09  | -0.94  | 0.37   | 0.12   | -2.63  | -0.66  | 0.60   | 2.21   | 0.06   | 3.05   | 3.50   | 1.98   | 3.59   | 2.81   | 2.30   | 0.52   | 1.46   | 1.41   | -4.45  | 1.39   | 0.82   |
| 0.53   | 1.17   | 0.08   | -1.32  | 0.89   | -2.22  | -1.16  | -1.58  | -1.36  | -3.08  | -0.29  | -0.15  | -3.02  | -2.10  | -0.29  | -1.02  | -0.18  | 0.21   | 0.57   | 1.73   | -1.22  | -0.10  | -0.01  | -2.26  | 0.32   | 1.79   | -0.28  | 0.01   |
| 1.21   | 4.16   | 4.24   | 2.73   | 3.08   | -0.78  | 1.18   | -2.07  | -2.39  | -0.18  | -0.61  | -0.32  | 0.30   | 0.37   | 0.99   | 4.44   | 3.75   | 2.62   | 1.73   | 2.89   | 3.88   | 1.58   | 1.96   | 2.66   | 4.14   | 2.25   | 3.46   | 1.59   |
| -1.56  | -2.82  | -0.89  | -1.35  | -0.85  | -2.28  | -0.43  | -1.66  | -1.83  | 0.71   | -1.04  | -1.81  | -0.41  | -1.27  | 0.61   | -0.72  | -0.08  | -0.23  | 0.60   | 0.23   | -0.21  | 0.03   | -1.68  | 0.27   | -1.06  | -0.37  | -0.69  | -0.54  |
| 2.93   | 2.61   | 1.10   | 1.92   | 4.76   | 0.23   | 0.35   | -1.62  | -2.40  | -0.91  | 1.18   | -0.74  | 0.87   | -0.20  | 4.83   | 3.25   | 3.80   | 3.64   | 1.77   | 4.06   | 2.97   | 3.07   | 3.07   | 2.50   | 2.72   | 3.38   | 2.49   | 3.13   |
| -2.26  | -2.31  | -3.07  | -1.41  | -0.43  | 1.84   | 3.09   | 3.58   | 3.64   | 3.02   | 1.50   | 2.21   | 2.21   | 0.90   | -1.43  | -1.08  | -1.17  | -3.00  | -0.70  | -0.88  | -0.86  | -2.50  | -4.91  | -4.49  | -2.44  | -3.18  | -4.69  | -3.45  |
| 0.54   | -1.16  | -1.68  | 0.17   | -0.27  | 1.90   | 3.12   | 4.50   | 3.38   | 2.36   | 3.65   | 3.10   | 2.17   | 1.19   | -0.70  | -0.40  | -1.17  | 0.32   | -0.56  | 0.66   | -0.64  | 0.23   | -3.44  | -2.87  | -2.32  | -1.08  | -1.20  | -1.02  |
| 1.19   | 0.31   | -0.75  | 1.77   | 1.14   | -1.10  | 1.92   | 7.00   | -0.36  | 0.89   | 1.06   | 0.07   | 1.67   | 0.65   | 0.34   | -0.41  | 0.74   | -0.04  | -1.19  | 1.48   | 0.79   | 0.12   | -1.76  | -0.09  | -0.24  | -0.35  | -0.38  | -0.14  |
| 0.95   | 4.79   | 4.65   | 1.82   | 2.75   | -1.44  | 0.41   | 1.61   | 0.44   | 0.72   | -0.13  | -0.21  | 0.07   | -0.55  | 4.61   | 4.83   | 5.32   | 3.81   | 2.75   | 4.85   | 3.38   | 5.78   | 3.23   | 4.50   | 4.32   | 3.09   | 5.54   | 4.55   |
| 3.15   | 5.44   | 4.35   | 1.93   | 3.10   | -0.31  | -0.05  | -0.17  | 0.92   | 0.00   | -0.27  | -0.09  | -0.36  | -0.03  | 1.15   | 1.47   | 0.65   | 1.74   | 0.64   | 2.13   | 2.07   | 1.58   | 1.61   | 0.69   | 1.25   | 2.21   | 3.02   | 2.39   |
| 0.77   | -2.34  | 2.67   | 2.36   | 2.42   | 1.56   | 0.76   | 1.75   | 0.61   | 1.67   | 2.28   | 1.11   | 2.10   | 1.34   | 2.53   | 1.83   | 3.68   | 1.81   | 1.10   | 2.66   | 1.16   | 2.07   | 1.84   | 0.61   | 2.63   | 0.46   | 3.14   | 2.78   |
| -0.24  | -4.30  | -2.57  | 4.23   | 2.17   | 5.18   | 9.95   | 8.13   | 6.34   | 11.66  | 7.83   | 5.14   | 7.99   | 7.16   | 7.96   | 10.97  | 9.46   | 7.64   | 9.04   | 9.40   | 9.30   | 9.49   | 8.88   | 12.26  | 12.15  | 9.76   | 5.92   | 7.17   |
| -2.22  | -18.46 | -7.50  | 4.22   | 4.07   | 11.84  | 18.04  | 15.95  | 13.23  | 18.30  | 17.29  | 11.06  | 13.98  | 11.96  | 16.53  | 17.51  | 16.42  | 15.06  | 16.24  | 16.22  | 15.73  | 16.54  | 14.79  | 19.18  | 17.70  | 15.51  | 11.77  | 13.63  |
| -5.43  | -7.83  | -6.36  | -5.91  | -3.34  | -4.25  | -7.14  | -5.22  | -5.50  | -5.13  | -6.54  | -5.48  | -4.23  | -5.36  | -3.07  | -6.49  | -4.97  | -3.73  | -4.96  | -3.23  | -2.61  | -2.59  | -3.23  | -7.01  | -6.03  | -2.97  | -2.94  | -4.42  |
| -9.23  | -8.87  | -3.14  | -2.16  | -3.44  | 2.96   | 5.29   | 2.40   | 2.95   | 5.03   | 1.34   | 2.06   | 3.77   | 2.08   | -0.09  | 1.17   | 1.62   | 0.94   | -0.82  | 0.83   | 0.88   | -0.34  | -0.03  | 0.56   | 2.35   | 2.20   | 1.66   | 1.99   |
| -9.90  | -11.15 | -3.91  | -0.09  | -3.99  | 9.07   | 8.75   | 10.08  | 8.96   | 11.88  | 9.15   | 9.19   | 11.00  | 8.00   | 0.25   | 3.00   | 1.66   | 2.11   | 1.52   | 1.76   | 0.26   | -0.54  | -0.14  | 1.65   | 3.72   | 3.96   | 3.15   | 2.08   |
| -7.69  | -11.92 | -6.84  | -10.39 | -1.92  | -20.64 | -17.16 | -20.75 | -20.56 | -18.19 | -18.71 | -20.98 | -20.06 | -16.42 | -0.08  | -2.48  | -0.59  | 0.87   | -2.28  | 1.00   | 0.56   | -1.58  | -1.32  | -2.86  | -3.49  | -1.29  | -3.82  | -4.22  |
| 1.36   | 3.41   | 0.80   | 2.03   | 0.68   | -1.09  | 0.09   | -1.39  | -1.46  | 0.68   | -0.11  | -1.43  | -0.62  | -1.19  | 1.43   | 1.11   | 1.19   | 1.69   | 0.28   | 2.18   | 0.47   | 1.01   | -0.30  | 2.02   | 1.46   | 0.51   | 2.43   | 0.13   |
| 0.66   | -0.04  | 0.82   | -0.61  | 0.30   | -2.34  | -1.02  | -1.34  | -2.10  | -0.78  | -0.55  | -1.58  | -0.30  | -0.96  | -0.10  | -0.44  | 0.24   | -0.11  | -0.67  | -0.94  | 0.67   | 0.37   | -1.13  | -0.17  | 0.90   | -0.21  | -0.41  | 0.78   |
| 1.43   | 1.06   | 1.49   | 0.91   | 1.71   | -0.79  | -0.82  | -0.52  | -2.18  | -0.16  | -0.44  | -1.73  | -0.86  | -0.51  | 0.39   | 1.28   | 1.08   | 1.86   | 0.34   | 3.52   | 1.33   | 0.64   | 1.16   | 0.35   | 0.90   | 1.12   | -0.67  | 2.03   |
| 0.74   | 1.81   | 1.60   | -0.06  | -1.44  | -2.78  | -1.38  | -1.28  | -1.88  | -1.00  | -1.95  | -2.81  | -1.26  | -0.73  | 0.70   | 2.87   | 2.45   | -0.12  | 2.35   | 1.74   | 2.26   | 1.74   | -13.08 | -12.32 | -12.38 | -12.69 | -5.01  | -10.03 |
| -0.23  | 1.00   | 0.38   | -0.95  | 1.12   | -1.61  | -1.39  | -2.42  | -3.87  | -1.01  | -0.91  | -3.01  | -2.19  | -2.14  | 2.11   | 1.29   | 1.28   | 2.41   | 0.89   | 2.03   | 1.79   | 1.21   | 0.28   | 0.22   | 2.66   | 1.61   | 0.61   | 0.07   |
| 0.16   | 2.36   | 2.65   | 0.38   | -0.77  | -6.46  | -4.34  | -6.26  | -5.70  | -7.70  | -4.68  | -4.32  | -4.27  | -4.54  | 2.89   | 2.84   | 3.43   | 3.60   | 3.77   | 3.50   | 3.10   | 2.51   | 8.72   | 9.21   | 5.57   | 6.75   | 11.01  | 6.67   |
| 0.91   | 3.49   | 4.43   | 2.08   | 1.78   | -0.30  | 0.76   | 0.97   | -1.03  | 0.39   | 2.41   | 0.38   | 1.12   | -0.08  | 2.85   | 1.69   | 2.52   | 2.53   | 3.30   | 2.74   | 3.72   | 3.27   | 0.82   | 2.00   | 2.09   | 1.70   | 1.35   | 3.85   |
| 1.08   | 2.62   | 2.77   | 1.33   | 1.97   | -0.94  | 0.22   | 0.75   | -0.14  | 1.19   | 0.42   | -0.19  | 0.12   | 0.83   | 1.66   | 1.46   | 1.63   | 1.94   | 1.55   | 1.96   | 1.64   | 2.91   | 2.35   | 1.99   | 2.19   | 2.01   | 2.79   | 1.97   |
| 1.45   | 3.22   | 2.54   | 3.37   | 1.73   | -1.00  | 0.39   | 0.18   | -1.46  | 0.71   | 0.15   | -0.35  | 1.04   | -0.33  | 1.40   | 0.68   | 1.71   | 2.25   | 0.75   | 0.62   | 2.59   | 1.02   | 0.90   | 1.49   | 2.24   | 2.26   | 2.19   | 2.75   |
| -3.66  | -4.86  | -2.14  | -1.19  | -0.04  | -1.43  | -1.28  | 0.46   | -0.24  | 1.86   | 0.51   | -2.18  | -0.62  | -1.10  | 0.74   | 0.18   | 0.77   | 0.86   | 0.15   | 1.32   | 0.61   | 2.27   | -0.03  | -1.41  | -0.08  | 1.37   | 0.23   | 1.98   |
| -2.78  | -0.50  | 0.01   | -1.46  | 0.37   | -2.71  | -1.37  | -0.39  | -2.43  | -0.97  | 0.90   | -1.25  | -1.59  | -1.83  | 0.15   | -0.81  | 0.46   | -0.92  | -0.50  | -0.58  | 1.23   | 0.02   | -1.01  | -1.40  | 0.71   | -0.23  | 0.54   | 0.28   |
| 1.95   | 5.15   | 0.81   | 1.14   | 1.98   | 0.03   | 0.29   | 0.04   | -0.99  | 1.29   | 1.31   | -0.18  | 0.26   | -0.56  | 1.30   | 1.59   | 2.03   | 1.99   | 1.44   | 2.01   | 1.93   | 1.00   | 1.54   | 1.48   | 1.02   | 0.13   | 2.73   | 1.08   |
| 0.30   | 3.99   | 1.77   | -0.30  | 2.36   | -7.00  | -5.54  | -5.30  | -6.56  | -6.21  | -5.13  | -6.45  | -5.02  | -5.92  | -0.03  | 1.30   | 1.98   | 1.92   | 0.81   | 0.50   | 1.19   | 1.88   | -0.15  | -0.45  | 0.05   | 0.97   | 0.16   | 0.98   |
| 1.41   | 4.55   | 2.63   | 1.61   | 1.28   | 1.49   | 1.44   | 1.74   | 1.90   | 2.81   | 1.79   | 1.96   | 0.70   | 1.18   | 1.45   | 0.00   | 1.30   | 1.21   | 0.79   | 1.86   | 2.89   | 1.70   | 0.07   | 0.24   | 1.38   | 1.80   | 0.77   | 1.17   |
| -1.60  | 2.58   | -0.06  | 0.92   | 1.30   | 0.12   | -0.63  | 0.38   | -0.77  | -0.62  | -0.89  | -0.31  | 0.47   | -0.15  | -0.24  | 1.88   | 1.36   | 1.70   | -0.37  | -0.21  | -2.42  | 0.96   | -0.32  | 1.34   | 0.41   | 0.49   | 0.58   | 0.51   |
| -4.90  | -8.50  | -1.18  | -1.43  | -3.46  | 8.77   | 7.96   | 9.79   | 7.18   | 12.09  | 10.13  | 6.70   | 14.38  | 8.68   | -0.42  | -0.69  | 0.68   | -1.54  | 0.56   | 2.01   | 1.00   | 1.02   | 1.58   | 0.83   | 1.18   | 3.12   | -0.23  | 3.26   |
| -6.10  | -6.52  | -1.90  | 2.65   | -6.76  | 11.98  | 12.83  | 13.26  | 8.70   | 16.17  | 13.67  | 9.63   | 16.68  | 10.84  | 0.00   | 1.08   | 0.80   | 0.75   | 0.44   | -0.34  | -0.11  | 1.22   | 2.61   | 1.49   | 2.48   | 0.89   | 0.03   | 1.82   |
| -7.22  | -15.19 | -6.73  | -10.44 | -5.67  | -29.71 | -27.45 | -26.80 | -25.02 | -28.03 | -27.30 | -26.87 | -30.73 | -22.47 | 1.22   | -1.37  | -1.46  | -2.10  | -3.20  | -0.28  | 2.04   | -1.22  | -2.43  | -4.24  | -5.23  | -6.23  | -10.30 | -3.59  |
| 0.66   | 2.87   | 0.26   | 0.33   | -0.61  | -13.03 | -10.95 | -8.93  | -8.88  | -11.21 | -7.65  | -10.63 | -10.18 | -9.18  | 3.18   | 2.36   | 2.21   | 3.42   | 2.80   | 3.16   | 2.99   | 3.37   | 0.96   | 0.89   | 1.61   | 3.39   | 1.16   | 0.63   |
| 2.40   | 6.17   | 1.44   | -0.45  | 1.39   | -22.37 | -18.46 | -17.28 | -19.07 | -17.01 | -13.49 | -19.91 | -18.77 | -20.46 | 5.16   | 4.62   | 4.65   | 5.26   | 2.88   | 4.24   | 6.10   | 4.36   | 1.34   | 0.48   | 2.08   | 1.90   | 0.78   | 1.59   |
| -0.40  | -4.72  | -0.97  | 0.86   | -3.54  | -2.38  | -6.97  | -3.46  | -1.57  | -4.36  | -1.91  | -2.25  | -4.73  | -2.76  | 0.38   | 0.32   | 3.16   | 0.79   | 5.09   | 0.95   | 1.35   | 1.56   | -1.68  | 1.98   | 1.07   | 1.28   | 2.30   | 3.17   |
| -14.33 | -14.43 | -17.79 | -13.59 | -14.54 | -9.48  | -6.99  | -9.25  | -9.85  | -7.86  | -6.97  | -6.41  | -6.50  | -7.01  | -11.36 | -11.55 | -15.84 | -12.03 | -12.54 | -15.74 | -16.07 | -16.82 | -13.07 | -13.52 | -16.83 | -14.54 | -15.27 | -15.97 |
| 1.00   | 1.42   | 3.15   | 0.27   | 1.48   | -0.78  | 0.42   | 0.45   | -0.06  | 1.37   | 0.22   | -1.16  | 0.07   | 0.72   | 1.26   | 0.42   | 2.38   | 1.34   | 1.83   | 2.12   | 1.46   | 2.73   | 0.51   | 1.19   | 2.26   | 2.22   | 1.28   | 1.28   |
| 1.10   | 0.30   | -1.02  | -0.07  | 0.48   | -2.51  | -1.92  | -1.75  | -3.58  | -2.39  | -2.88  | -3.01  | -2.16  | -1.65  | 1.45   | 1.31   | 3.64   | 1.07   | 2.89   | 2.28   | 4.20   | 3.52   | 1.68   | 2.20   | 1.82   | 0.46   | 2.72   | -0.28  |
| -1.17  | -0.12  | 1.30   | 0.63   | 0.87   | -1.51  | -0.21  | 1.12   | -1.46  | -0.17  | 0.39   | -1.45  | -0.03  | 0.31   | -0.35  | -0.55  | 0.83   | 0.05   | -0.37  | 0.74   | -0.46  | 0.04   | -1.86  | -1.55  | -1.67  | -0.17  | 0.38   | -0.16  |
| -1.22  | -0.19  | -0.80  | -0.34  | -0.51  | -1.13  | 0.23   | 0.59   | 0.78   | 0.36   | 1.04   | 0.00   | 0.77   | 0.13   | -1.01  | -1.36  | -1.29  | -1.62  | -0.40  | -1.08  | 0.42   | -0.31  | -1.39  | -1.17  | -0.26  | -1.11  | -0.24  | -0.50  |
| 1.06   | 2.11   | 2.84   | 1.61   | 0.51   | 0.33   | -0.08  | 0.89   | 0.83   | 0.97   | 1.70   | 0.04   | 0.63   | 0.40   | 1.60   | 1.94   | 1.64   | 3.41   | 1.91   | 3.21   | 1.76   | 0.49   | 0.31   | 2.87   | 3.30   | 0.61   | 1.49   | 3.23   |
| -13.19 | -3.74  | 4.81   | -5.78  | -8.30  | -5.64  | -3.55  | -2.05  | -4.64  | -5.95  | -3.30  | -5.05  | -7.10  | -2.86  | -9.08  | -11.25 | -5.68  | -9.01  | 2.21   | -7.27  | -7.57  | -1.48  | 1.18   | -0.96  | 0.38   | -0.64  | -0.47  | -0.47  |
| -12.35 | -7.69  | 8.51   | -5.21  | -4.90  | -6.16  | -7.42  | -5.00  | -3.90  | -9.87  | -8.49  | -7.79  | -12.03 | -9.19  | -13.37 | -17.21 | -15.98 | -12.86 | -13.36 | -3.75  | -12.52 | -13.21 | 0.63   | 0.77   | 0.45   | 0.54   | -0.82  | 1.39   |
| -9.33  | -10.10 | 11.56  | -2.37  | -4.10  | -9.34  | -13.68 | -8.37  | -5.23  | -16.69 | -12.21 | -12.93 | -12.60 | -9.73  | -24.   |        |        |        |        |        |        |        |        |        |        |        |        |        |

|        |        |        |        |        |        |        |        |        |        |        |        |        |        |        |        |        |        |        |        |        |        |        |        |        |        |        |        |
|--------|--------|--------|--------|--------|--------|--------|--------|--------|--------|--------|--------|--------|--------|--------|--------|--------|--------|--------|--------|--------|--------|--------|--------|--------|--------|--------|--------|
| 1.99   | 4.32   | 4.56   | 2.88   | 4.56   | -0.82  | 1.21   | -2.39  | -1.60  | 0.17   | -0.88  | -1.21  | -0.18  | 0.69   | 0.76   | 3.61   | 3.89   | 3.77   | 1.45   | 2.15   | 3.28   | 2.54   | 1.92   | 2.59   | 3.97   | 2.16   | 2.23   | 1.78   |
| -1.19  | -2.22  | -0.12  | -0.41  | -1.43  | -2.50  | -0.38  | -2.05  | -2.13  | 0.06   | -0.54  | -1.83  | 0.19   | -1.31  | -0.01  | -0.67  | -0.33  | -0.38  | 0.85   | 0.34   | -0.49  | 0.90   | -1.52  | 0.92   | -1.05  | -0.25  | 0.61   | -0.12  |
| 3.07   | 2.56   | 2.67   | 0.70   | 4.76   | -0.02  | 0.51   | -1.27  | -2.23  | 0.14   | 0.92   | -0.99  | 0.59   | -0.42  | 4.00   | 2.48   | 4.48   | 3.35   | 3.26   | 3.50   | 2.88   | 3.63   | 3.01   | 2.50   | 3.14   | 2.18   | 2.76   | 2.47   |
| -1.21  | -3.34  | -2.07  | -0.12  | -0.65  | 0.66   | 3.19   | 3.37   | 3.13   | 1.90   | 2.02   | 2.40   | 1.28   | 0.07   | -1.17  | -1.01  | -1.65  | -2.18  | 0.06   | -0.41  | -1.26  | -2.68  | -3.66  | -4.39  | -3.05  | -2.19  | -3.61  | -3.47  |
| 0.18   | -1.66  | -1.26  | 0.71   | 0.98   | 1.45   | 3.18   | 3.56   | 2.72   | 1.81   | 3.25   | 2.43   | 1.28   | 0.36   | 0.17   | -0.42  | 0.50   | 1.00   | 0.28   | 1.46   | 0.08   | 0.29   | -3.67  | -2.87  | -1.87  | -1.26  | 0.70   | -1.00  |
| 1.60   | 0.37   | 0.09   | 3.66   | 1.81   | -1.14  | 2.12   | 1.67   | -0.34  | 0.32   | 1.56   | -0.56  | 1.08   | -0.18  | -0.34  | -0.40  | 1.09   | 0.64   | 0.84   | 1.53   | 0.39   | 0.92   | -2.58  | -0.75  | 1.17   | 0.39   | 0.89   | 1.21   |
| 2.09   | 4.23   | 4.87   | 1.45   | 2.50   | -1.69  | 0.70   | 2.13   | 0.19   | 1.11   | 0.59   | -0.47  | 0.06   | -1.06  | 4.41   | 4.54   | 5.35   | 4.52   | 2.53   | 5.14   | 4.55   | 6.49   | 3.81   | 4.08   | 5.02   | 3.90   | 4.36   | 4.76   |
| 3.09   | 5.70   | 4.41   | 0.91   | 3.63   | 0.45   | -0.06  | 0.50   | 0.73   | 0.45   | -0.12  | 0.97   | 0.20   | -0.17  | 0.90   | 1.39   | 0.73   | 1.28   | 0.16   | 1.71   | 1.89   | 1.26   | 1.37   | 0.61   | 1.27   | 1.54   | 2.36   | 1.74   |
| 1.73   | -2.18  | 3.63   | 2.33   | 0.25   | 0.79   | 0.71   | 1.54   | 2.96   | 1.55   | 1.04   | 0.66   | 1.58   | 1.26   | 2.24   | 1.36   | 2.71   | 3.75   | 1.90   | 2.82   | 1.86   | 1.60   | 2.12   | 1.16   | 3.28   | 2.04   | 4.53   | 2.67   |
| 1.58   | -4.17  | -2.21  | 7.66   | 2.67   | 3.63   | 9.57   | 4.41   | 5.46   | 8.66   | 8.21   | 4.43   | 5.30   | 4.96   | 11.65  | 14.58  | 13.98  | 10.77  | 13.56  | 12.98  | 13.47  | 13.11  | 12.58  | 16.14  | 15.52  | 13.19  | 10.68  | 11.73  |
| -0.91  | -18.01 | -5.61  | 8.96   | 3.68   | 8.57   | 15.63  | 12.77  | 10.71  | 15.21  | 15.14  | 8.23   | 10.54  | 8.62   | 23.41  | 24.75  | 23.68  | 22.16  | 23.88  | 23.23  | 22.94  | 24.04  | 21.33  | 26.69  | 25.80  | 22.36  | 17.01  | 20.58  |
| -5.34  | -11.52 | -6.87  | -8.12  | -6.23  | -3.93  | -5.59  | -4.96  | -5.69  | -4.40  | -5.33  | -4.01  | -3.46  | -4.13  | -6.32  | -9.37  | -7.65  | -4.46  | -6.42  | -5.19  | -5.01  | -4.16  | -5.64  | -10.24 | -9.13  | -4.30  | -5.35  | -6.61  |
| -9.38  | -10.75 | -3.28  | 0.47   | -2.61  | 3.31   | 3.92   | 2.30   | 2.59   | 4.68   | 2.78   | 2.35   | 2.95   | 1.48   | 0.20   | 0.40   | 1.67   | 0.46   | 0.43   | 0.21   | 0.57   | 0.03   | 0.39   | 1.10   | 2.58   | 1.09   | 2.29   | 2.41   |
| -10.35 | -12.23 | -4.08  | 2.16   | -4.62  | 7.99   | 10.74  | 9.36   | 9.66   | 10.73  | 10.21  | 9.51   | 9.69   | 7.14   | 0.82   | 0.86   | 3.01   | 1.38   | 2.99   | 2.26   | 0.96   | 1.16   | 0.76   | 2.83   | 4.16   | 3.67   | 3.29   | 3.40   |
| -8.77  | -13.81 | -8.88  | -14.10 | -3.65  | -19.58 | -17.37 | -20.16 | -22.48 | -16.00 | -20.33 | -20.80 | -17.91 | -15.76 | -1.17  | -3.04  | -1.27  | -1.30  | -3.45  | 0.56   | -0.44  | -0.78  | -2.86  | -5.21  | -6.27  | -5.19  | -5.41  | -5.49  |
| 1.95   | 2.32   | 1.29   | 1.27   | 0.41   | -2.29  | -0.59  | -0.44  | -1.35  | 0.59   | -0.03  | -1.61  | -0.31  | -1.58  | 0.63   | 0.74   | 2.22   | 2.80   | 0.81   | 2.35   | 0.35   | 1.09   | 0.31   | 1.66   | 0.70   | 0.81   | 2.03   | 1.10   |
| 0.72   | -0.14  | 0.73   | -0.40  | 0.79   | -2.24  | -0.63  | -2.00  | -2.09  | -0.57  | -0.34  | -1.57  | -0.12  | -1.06  | -0.63  | -0.97  | 0.04   | 0.29   | -0.72  | -0.41  | 0.68   | 0.60   | -1.59  | -0.32  | 1.06   | -0.41  | -2.06  | -0.56  |
| 1.61   | 2.61   | 2.04   | 0.86   | 0.97   | -1.72  | -0.80  | -0.06  | -2.17  | -0.09  | -0.18  | -1.78  | -0.17  | -0.96  | 0.45   | 2.08   | 0.94   | 2.89   | 0.36   | 3.06   | 0.58   | 0.63   | 0.39   | 2.12   | 1.08   | 0.08   | 1.10   | 1.57   |
| 1.40   | 1.68   | 0.82   | -0.01  | -1.76  | -3.23  | -1.71  | -1.60  | -2.17  | -1.42  | -1.71  | -2.81  | -0.95  | -1.22  | 0.63   | 3.23   | 2.68   | 0.43   | 2.55   | 2.09   | 2.66   | 2.20   | -12.64 | -13.08 | -13.11 | -12.46 | -7.29  | -10.98 |
| 0.16   | 0.91   | 0.43   | -0.63  | 1.94   | -2.95  | -1.59  | -2.84  | -3.94  | -1.20  | -1.12  | -2.88  | -2.24  | -2.72  | 1.55   | 1.61   | 1.18   | 2.86   | 1.38   | 2.61   | 1.88   | 2.08   | 0.28   | -0.03  | 2.23   | 1.05   | 0.04   | 0.46   |
| 0.43   | 1.77   | -0.28  | 0.09   | -0.37  | -5.23  | -5.19  | -4.85  | -5.98  | -4.51  | -5.09  | -5.53  | -4.03  | -4.51  | 3.25   | 3.03   | 4.14   | 4.28   | 3.61   | 2.44   | 3.29   | 1.97   | 8.88   | 10.06  | 6.69   | 8.15   | 11.01  | 8.24   |
| 2.16   | 3.41   | 4.22   | 2.97   | 1.01   | -0.90  | 0.47   | 1.31   | -1.08  | 1.49   | 0.81   | 0.58   | 1.65   | -0.53  | 1.51   | 1.18   | 2.61   | 2.41   | 3.28   | 3.37   | 3.75   | 2.01   | 0.83   | 2.25   | 1.55   | 1.39   | 2.43   | 3.23   |
| 1.11   | 2.28   | 3.05   | 1.22   | 2.37   | -0.79  | 0.06   | 0.97   | -0.39  | 0.95   | 1.12   | -0.49  | 0.22   | 1.34   | 1.59   | 1.63   | 2.16   | 2.16   | 1.57   | 2.25   | 1.87   | 2.93   | 2.14   | 1.94   | 2.66   | 2.72   | 2.81   | 1.98   |
| 0.60   | 3.02   | 3.26   | 3.92   | 1.18   | -2.18  | 0.27   | 0.14   | -0.76  | 0.15   | 0.56   | -0.49  | 0.39   | 0.16   | 0.65   | 1.61   | 2.13   | 2.39   | 0.96   | 0.55   | 2.57   | 1.01   | 1.60   | 2.42   | 2.34   | 2.85   | 2.63   | 3.48   |
| -2.12  | -6.34  | -2.30  | -0.86  | 0.16   | -1.68  | -0.52  | -0.01  | -0.01  | 1.80   | 0.25   | -0.83  | -1.06  | -0.94  | 0.16   | 0.02   | 0.14   | 1.11   | 1.39   | 1.22   | 0.00   | 2.47   | 0.01   | -0.83  | -0.14  | 0.74   | 0.82   | 1.23   |
| 3.92   | -0.73  | 0.61   | -0.01  | -0.14  | -2.30  | -0.82  | -0.12  | -1.74  | -1.06  | -1.54  | -1.28  | -0.24  | -1.65  | -0.08  | -1.25  | -0.09  | -0.02  | -1.30  | -0.60  | 0.70   | -0.41  | -0.81  | -2.05  | -0.30  | -0.75  | 1.20   | -0.43  |
| 2.13   | 3.88   | 0.46   | 2.17   | 1.12   | 0.14   | -0.16  | -0.30  | -0.49  | 1.13   | 1.66   | -0.57  | 0.72   | -0.20  | 0.73   | 2.18   | 1.43   | 1.73   | 1.14   | 1.78   | 0.99   | 2.93   | 1.46   | 0.62   | 1.53   | 1.66   | 2.59   | 2.46   |
| -0.37  | 2.55   | 1.66   | -1.24  | 0.94   | -6.32  | -4.90  | -4.22  | -5.55  | -4.38  | -5.68  | -5.17  | -3.90  | -4.13  | -0.47  | -0.42  | 0.47   | 0.57   | 0.46   | -0.30  | 0.17   | 0.40   | -1.14  | -2.54  | -1.00  | 0.07   | -0.44  | 0.27   |
| 2.02   | 4.06   | 2.65   | 1.62   | 1.29   | 0.50   | 1.38   | 1.82   | 2.20   | 1.92   | 0.88   | 0.80   | 0.81   | 0.65   | 0.99   | 0.48   | 3.06   | 1.73   | 1.55   | 2.10   | 2.30   | 2.05   | 0.73   | 0.91   | 1.61   | 1.97   | 0.73   | 1.83   |
| -2.66  | 0.85   | 1.33   | 0.05   | 1.21   | -0.01  | 0.54   | 0.72   | -0.35  | 0.03   | 0.19   | 1.70   | -0.22  | -0.21  | 0.83   | 0.39   | 0.88   | 1.79   | 0.68   | -1.10  | 1.50   | 2.09   | 0.23   | 0.22   | 0.19   | 0.09   | 0.94   | -0.44  |
| -4.98  | -8.86  | -0.56  | 1.77   | -3.99  | 8.66   | 10.78  | 11.00  | 9.56   | 12.42  | 10.90  | 8.24   | 12.17  | 7.92   | -0.45  | -0.60  | 0.69   | -0.58  | 2.96   | 2.16   | 0.68   | 1.79   | 2.33   | 1.86   | 2.90   | 5.08   | -0.42  | 3.26   |
| -6.28  | -6.42  | -0.77  | 3.54   | -7.51  | 11.77  | 15.61  | 14.74  | 11.79  | 15.50  | 15.05  | 10.80  | 14.32  | 9.59   | 0.28   | 1.85   | 1.06   | 1.45   | 1.35   | 0.27   | -0.03  | 3.24   | 3.11   | 1.56   | 2.32   | 2.39   | 1.54   | 2.15   |
| -9.19  | -18.42 | -9.54  | -13.23 | -8.05  | -28.69 | -29.93 | -28.85 | -29.99 | -27.36 | -28.39 | -30.09 | -27.97 | -21.17 | -0.58  | -2.37  | -3.95  | -2.50  | -4.41  | -2.87  | -1.24  | -1.39  | -4.46  | -6.73  | -8.90  | -5.83  | -11.87 | -5.75  |
| 1.61   | 1.20   | 0.43   | -2.04  | -2.11  | -13.60 | -11.71 | -10.87 | -12.33 | -10.86 | -10.27 | -11.75 | -9.80  | -10.66 | 2.17   | 1.39   | 2.94   | 3.24   | 1.51   | 1.61   | 3.99   | 3.06   | 0.03   | -0.42  | 0.63   | 0.35   | 0.43   | 0.30   |
| 0.02   | 4.72   | 0.04   | -3.23  | -0.06  | -25.63 | -22.30 | -19.48 | -23.10 | -17.20 | -17.28 | -23.08 | -18.58 | -21.46 | 3.15   | 2.28   | 4.26   | 4.08   | 1.41   | 4.23   | 4.72   | 3.11   | 0.68   | -1.48  | -0.26  | 0.66   | -0.36  | 0.06   |
| 0.04   | -3.52  | -0.27  | 0.32   | -0.83  | -3.33  | -7.83  | -4.79  | -3.09  | -4.58  | -2.32  | -2.04  | -5.07  | -3.30  | -0.34  | 1.72   | 2.87   | 1.87   | 5.26   | 0.97   | 0.66   | 0.59   | -1.60  | 2.05   | 0.36   | 1.42   | 1.25   | 1.56   |
| -15.63 | -15.93 | -20.44 | -15.56 | -15.90 | -11.66 | -5.86  | -10.08 | -10.16 | -7.70  | -7.33  | -8.04  | -5.77  | -6.59  | -13.10 | -13.26 | -17.76 | -14.49 | -13.21 | -17.96 | -16.70 | -18.48 | -14.96 | -15.65 | -19.41 | -15.51 | -17.56 | -19.50 |
| 0.32   | 1.18   | 2.82   | 0.73   | 1.50   | -0.76  | 0.37   | 0.90   | -0.13  | 0.72   | 0.34   | -1.13  | 0.24   | -0.11  | 1.29   | 1.05   | 3.22   | 1.96   | 2.03   | 3.01   | 1.80   | 2.76   | 1.01   | 1.73   | 2.15   | 2.23   | 1.94   | 1.79   |
| 1.87   | 1.60   | 0.03   | 1.30   | 3.36   | -3.55  | -2.03  | -1.82  | -3.54  | -1.64  | -3.34  | -2.52  | -1.26  | -1.23  | 1.09   | 2.95   | 3.77   | 2.09   | 3.84   | 1.96   | 4.68   | 3.42   | 2.21   | 3.25   | 2.70   | 0.85   | 3.31   | 1.02   |
| -0.53  | -1.10  | 1.75   | -0.22  | 0.72   | -1.43  | -0.42  | 0.65   | -1.35  | -0.28  | 1.01   | -1.28  | -0.08  | 0.30   | 0.03   | -0.75  | -1.19  | 0.34   | -1.24  | 0.44   | 0.06   | 0.36   | -1.98  | -1.81  | -0.67  | -0.23  | -1.33  | -1.17  |
| -1.46  | -0.69  | -1.01  | 0.28   | 0.16   | -0.97  | -0.02  | 0.69   | 0.80   | 0.50   | 0.56   | -0.59  | 0.80   | -0.25  | -1.37  | -0.96  | -0.96  | -1.11  | 0.10   | -0.86  | -0.04  | -0.55  | -1.08  | -1.41  | -0.86  | -0.07  | -0.02  | -0.65  |
| 1.22   | 2.22   | 3.70   | 0.36   | -0.08  | -0.76  | 1.04   | 0.49   | 0.60   | -0.25  | 1.97   | -0.53  | 0.29   | 0.55   | 1.39   | 1.43   | 2.08   | 2.59   | 1.23   | 2.73   | 1.51   | 1.66   | 2.26   | 1.94   | 3.16   | 1.75   | -0.01  | 3.15   |
| -14.93 | -1.93  | 4.88   | -6.18  | -8.68  | -5.10  | -3.35  | -3.28  | -5.58  | -6.39  | -4.74  | -5.01  | -7.19  | -3.17  | -2.52  | -1.07  | -13.10 | -8.32  | -10.69 | 1.35   | -11.09 | -9.30  | -1.23  | 0.83   | -2.82  | 0.06   | 0.15   | -0.36  |
| -14.11 | -5.30  | 8.93   | -6.04  | -5.66  | -6.05  | -8.18  | -3.89  | -4.87  | -10.28 | -7.41  | -8.24  | -11.97 | -5.84  | -10.50 | -19.51 | -18.09 | -15.66 | -16.13 | -5.36  | -17.28 | -13.67 | 0.82   | 0.83   | -1.35  | 0.47   | -0.26  | 0.03   |
| -11.77 | -8.64  | 12.63  | -2.96  | -4.29  | -9.09  | -12.27 | -8.36  | -8.78  | -15.52 | -12.39 | -12.29 | -19.74 | -9.56  | -21.08 | -29.94 | -27.94 | -23.97 | -23.53 | -10.52 | -28.43 | -23.64 | 0.02   | -0.67  | -0.54  | -0.10  | 1.59   | -0.08  |
| -8.00  | -11.98 | -6.77  | -2.26  | -5.05  | 4.18   | 7.30   | 5.87   | 4.15   | 4.38   | 6.23   | 2.59   | 3.04   | 5.21   | 4.61   | -4.91  | 2.74   | 2.81   | 3.55   | 4.74   | 4.54   | 3.57   | 2.28   | 4.54   | 4.63   | 3.50   | 5.23   | 4.19   |
| -11.28 | -14.89 | -10.27 | -3.03  | -7.42  | 4.51   | 6.84   | 5.81   | 4.20   | 4.76   | 6.49   | 3.93   | 3.36   | 5.67   | 5.08   | 4.74   | 6.33   | 3.81   | 4.12   | 5.29   | 4.38   | 6.28   | 3.42   | 4.00   | 4.46   | 4.23   | 4.52   | 3.52   |
| -7.07  | -11.85 | -5.97  | -9.59  | -6.96  | -13.46 | -16.22 | -12.08 | -13.51 | -8.53  | -12.70 | -      |        |        |        |        |        |        |        |        |        |        |        |        |        |        |        |        |

|        |        |        |        |        |        |        |        |        |        |        |        |        |        |        |        |        |        |        |        |        |        |        |        |        |        |        |        |
|--------|--------|--------|--------|--------|--------|--------|--------|--------|--------|--------|--------|--------|--------|--------|--------|--------|--------|--------|--------|--------|--------|--------|--------|--------|--------|--------|--------|
| -0.51  | -2.76  | -3.11  | -0.92  | 0.28   | 0.74   | 2.63   | 2.54   | 2.38   | 1.92   | 0.57   | 0.96   | 0.57   | -0.49  | -2.22  | -0.46  | -1.07  | -2.19  | 0.48   | 0.20   | -1.18  | -1.83  | -5.26  | -4.88  | -1.51  | -2.37  | -2.32  | -2.14  |
| 1.58   | -0.90  | -1.09  | 1.26   | 0.97   | 0.71   | 2.59   | 3.09   | 2.01   | 0.62   | 2.56   | 1.87   | 0.44   | -0.58  | 1.19   | 0.37   | 1.04   | 1.65   | 0.48   | 1.58   | 0.12   | 0.52   | -3.48  | -2.12  | -0.99  | -0.48  | -0.02  | -0.51  |
| 1.94   | -0.41  | -0.96  | 1.79   | 2.08   | -0.03  | 1.90   | 0.79   | -0.79  | 0.07   | 1.50   | 1.26   | 0.83   | 0.35   | 1.17   | 0.60   | 1.69   | 2.47   | 1.00   | 2.41   | -0.26  | 1.13   | -1.00  | -0.12  | 1.71   | 1.47   | 1.98   | 2.41   |
| 2.45   | 4.39   | 5.48   | 2.22   | 3.21   | -1.13  | 1.52   | 1.78   | -0.47  | 0.89   | 0.82   | 0.28   | 0.14   | -1.36  | 4.12   | 4.61   | 4.92   | 4.29   | 3.01   | 5.63   | 5.36   | 7.14   | 3.06   | 4.34   | 5.48   | 4.51   | 4.32   | 4.59   |
| 3.48   | 4.89   | 3.26   | 0.84   | 2.60   | 1.27   | 0.42   | 0.73   | 1.91   | 1.79   | 0.95   | 1.17   | 1.54   | 0.62   | 0.56   | 1.34   | 1.10   | 1.25   | -0.27  | 2.20   | 1.52   | 0.97   | 0.80   | 1.10   | 1.40   | 1.59   | 1.68   | 1.93   |
| 1.56   | -2.09  | 3.25   | 2.32   | 1.57   | 2.28   | 1.96   | 1.03   | 1.48   | 2.23   | 1.58   | 1.69   | 0.88   | 1.58   | 3.21   | 2.52   | 4.34   | 2.79   | 3.00   | 3.34   | 1.82   | 3.10   | 2.51   | 0.84   | 3.74   | 2.10   | 4.95   | 3.47   |
| 3.14   | -3.08  | 0.14   | 11.50  | 6.09   | 1.85   | 7.95   | 5.04   | 4.42   | 5.88   | 6.28   | 2.56   | 3.12   | 3.02   | 15.21  | 18.81  | 18.01  | 14.44  | 18.60  | 17.49  | 18.23  | 17.10  | 16.43  | 20.99  | 21.34  | 17.23  | 14.62  | 16.41  |
| 2.64   | -16.68 | -2.04  | 15.94  | 7.93   | 6.08   | 12.65  | 9.23   | 7.50   | 10.86  | 11.94  | 5.24   | 5.66   | 5.06   | 31.47  | 32.17  | 31.64  | 29.10  | 31.86  | 33.00  | 31.26  | 31.99  | 27.39  | 34.33  | 33.60  | 29.92  | 25.63  | 28.50  |
| -8.84  | -13.40 | -9.49  | -10.07 | -9.09  | -2.83  | -4.30  | -9.73  | -4.00  | -3.49  | -5.07  | -2.28  | -2.09  | -2.86  | -7.77  | -11.38 | -9.50  | -8.50  | -8.65  | -9.14  | -8.21  | -7.84  | -7.16  | -12.06 | -11.84 | -7.15  | -8.92  | -9.58  |
| -9.29  | -10.76 | -2.93  | 0.27   | -2.14  | 3.10   | 3.84   | 2.02   | 3.09   | 3.94   | 3.36   | 2.25   | 2.77   | 0.57   | -0.10  | 1.18   | 2.37   | 0.60   | 0.53   | 1.02   | 1.17   | 0.64   | 0.21   | 1.33   | 3.34   | 2.73   | 3.15   | 3.62   |
| -10.01 | -12.22 | -3.33  | 3.80   | -1.94  | 0.27   | -1.94  | 8.20   | 8.87   | 9.20   | 8.71   | 8.44   | 7.63   | 5.39   | 1.88   | 1.83   | 3.86   | 1.92   | 4.41   | 2.86   | 1.17   | 1.12   | 1.18   | 3.97   | 5.72   | 5.61   | 4.99   | 5.43   |
| -12.79 | -15.15 | -10.88 | -20.73 | -5.47  | -17.68 | -17.34 | -17.64 | -20.30 | -14.43 | -18.50 | -18.21 | -14.87 | -13.07 | -4.45  | -6.11  | -5.28  | -4.08  | -6.84  | -0.66  | -2.13  | -2.67  | -5.86  | -8.27  | -7.46  | -6.31  | -8.45  | -5.49  |
| 1.63   | 3.05   | -0.33  | 1.22   | 0.90   | -1.94  | 0.27   | -0.92  | -1.48  | -0.05  | -0.56  | -1.98  | -0.46  | -1.63  | 0.63   | 1.94   | 1.85   | 1.41   | 1.23   | 2.16   | 1.18   | 1.18   | -0.86  | 1.70   | 2.60   | 0.61   | 3.15   | 1.18   |
| 0.79   | -0.22  | 0.94   | -0.36  | 0.39   | -1.95  | -0.83  | -2.27  | -2.06  | -0.30  | -0.50  | -1.20  | -0.17  | -0.56  | -0.08  | -0.42  | 0.78   | 0.01   | -0.71  | -0.68  | 0.65   | 0.70   | -0.92  | 0.13   | 1.12   | 0.71   | -0.52  | -0.11  |
| 1.32   | 2.81   | 1.14   | 0.98   | 1.41   | -1.65  | -0.80  | -0.44  | -2.08  | -0.06  | -0.55  | -1.21  | -0.37  | -0.96  | -0.20  | 3.32   | 1.85   | 2.60   | 0.12   | 3.82   | 1.71   | 1.12   | 1.00   | 1.61   | 2.59   | 1.19   | 0.62   | 1.96   |
| 0.90   | 2.24   | 1.15   | -0.45  | -1.37  | -3.60  | -0.42  | -1.96  | -3.24  | -0.44  | -1.97  | -1.92  | -0.35  | -1.19  | 1.07   | 4.12   | 3.28   | 0.97   | 3.37   | 2.44   | 3.17   | 4.05   | -12.65 | -11.64 | -13.15 | -13.50 | -7.40  | -12.34 |
| -0.14  | 0.19   | -0.02  | -1.06  | 1.37   | -2.19  | -1.78  | -2.54  | -3.77  | -1.27  | -1.28  | -3.62  | -2.33  | -2.30  | 1.44   | 1.63   | 1.93   | 3.19   | 1.17   | 2.68   | 2.35   | 1.21   | 0.28   | 0.06   | 3.25   | 1.27   | 1.00   | -1.26  |
| 1.00   | 2.63   | 2.26   | 0.76   | -0.32  | -6.54  | -6.32  | -6.06  | -7.17  | -5.88  | -4.70  | -6.14  | -5.47  | -4.62  | 4.19   | 3.86   | 3.89   | 3.81   | 2.90   | 3.41   | 3.86   | 2.66   | 9.42   | 12.20  | 8.54   | 8.72   | 11.90  | 7.64   |
| 1.91   | 3.00   | 2.47   | 2.88   | 1.65   | -1.34  | -0.37  | 1.55   | -0.72  | 1.57   | 1.08   | 0.27   | 1.54   | 0.19   | 1.77   | 1.26   | 2.57   | 1.99   | 2.79   | 2.26   | 3.14   | 2.32   | 1.01   | 3.53   | 1.96   | 0.67   | 2.10   | 3.61   |
| 0.91   | 2.65   | 2.90   | 1.15   | 2.12   | -0.36  | 0.65   | 1.13   | 0.11   | 0.48   | 1.24   | -0.40  | 0.52   | 0.90   | 1.69   | 1.83   | 1.99   | 1.97   | 1.41   | 2.29   | 2.06   | 2.72   | 2.10   | 1.99   | 3.03   | 2.75   | 3.23   | 2.41   |
| 2.08   | 3.05   | 3.57   | 3.68   | 0.71   | -0.53  | 0.35   | 0.82   | -0.94  | 2.01   | 0.92   | -0.36  | -0.68  | 0.77   | 1.50   | 2.14   | 2.01   | 2.57   | 1.27   | 1.70   | 1.99   | 1.55   | 1.17   | 3.34   | 3.20   | 2.35   | 2.61   | 2.82   |
| -3.97  | -5.32  | -3.74  | -2.83  | -0.21  | -2.18  | -0.01  | 0.10   | 0.07   | 1.88   | 1.09   | -1.00  | -0.97  | -1.49  | -0.65  | 0.31   | 0.54   | 1.01   | 0.88   | 0.60   | -0.21  | 1.77   | -0.01  | -1.54  | -0.05  | 0.92   | 1.94   | 1.27   |
| -2.59  | 0.92   | -0.34  | -1.50  | 0.22   | -1.30  | -0.24  | 0.06   | -2.03  | 0.09   | -0.24  | -0.88  | -0.41  | -0.97  | -0.98  | -2.44  | -1.25  | -0.87  | -1.99  | -1.06  | 0.31   | -0.76  | -2.06  | -2.53  | -0.89  | -1.14  | -0.36  | -1.30  |
| 2.80   | 6.55   | 1.39   | 1.28   | 1.69   | -0.78  | 1.38   | 0.23   | -1.21  | 0.10   | 1.55   | 0.43   | 0.39   | -0.36  | 1.50   | 3.00   | 3.04   | 1.59   | 1.89   | 2.92   | 2.66   | 1.72   | 2.19   | 1.86   | 2.32   | 3.07   | 3.08   | 3.40   |
| 0.71   | 1.33   | -0.44  | -1.88  | -0.90  | -4.43  | -4.26  | -3.38  | -4.59  | -4.05  | -3.73  | -4.38  | -2.03  | -3.43  | -1.98  | -1.78  | -0.01  | 0.26   | -0.58  | -1.86  | -1.16  | -1.18  | -1.92  | -3.26  | -1.67  | -0.87  | -0.77  | -2.10  |
| 3.97   | 4.18   | 1.66   | 2.06   | 2.42   | 0.45   | 1.52   | 1.48   | 1.56   | 2.16   | 1.09   | 0.69   | 0.39   | 0.31   | 1.42   | 1.40   | 2.55   | 2.05   | 1.53   | 3.13   | 2.60   | 2.64   | 0.78   | 2.03   | 1.93   | 2.61   | 2.21   | 2.46   |
| -0.90  | -0.80  | -1.14  | 0.90   | 1.34   | -1.53  | -1.47  | 0.83   | -0.28  | -0.62  | -1.04  | 0.23   | -1.29  | -0.52  | 0.52   | 1.17   | 2.21   | 1.94   | 0.90   | -0.80  | 0.66   | 1.06   | 0.55   | 0.05   | 0.71   | -0.08  | 1.31   | 1.20   |
| -4.50  | -12.33 | -0.18  | 1.22   | -4.52  | 6.42   | 8.79   | 9.07   | 9.56   | 10.33  | 11.28  | 6.79   | 9.66   | 5.92   | -0.52  | 1.19   | 1.75   | -0.55  | 3.80   | 3.19   | 0.87   | 1.95   | 2.91   | 2.99   | 5.28   | 4.74   | 1.21   | 3.14   |
| -6.19  | -9.78  | -0.82  | 4.83   | -7.59  | 9.74   | 13.43  | 12.46  | 11.12  | 13.15  | 13.18  | 9.98   | 11.34  | 7.26   | 1.07   | 1.85   | 2.23   | 1.69   | 2.72   | 0.59   | 2.29   | 3.05   | 3.92   | 3.19   | 4.63   | 3.84   | 2.56   | 3.06   |
| -12.31 | -24.90 | -12.64 | -22.75 | -10.13 | -27.02 | -27.33 | -25.52 | -27.53 | -23.90 | -25.82 | -27.25 | -24.05 | -17.96 | -5.81  | -4.34  | -6.77  | -6.21  | -8.73  | -4.57  | -2.96  | -6.87  | -7.34  | -8.94  | -9.62  | -9.63  | -15.63 | -9.60  |
| -0.84  | 0.17   | -1.69  | -5.60  | -2.31  | -13.19 | -11.55 | -11.19 | -12.60 | -10.95 | -10.17 | -13.32 | -7.74  | -9.59  | 0.65   | 1.67   | 1.79   | 2.50   | -0.24  | 2.33   | 2.18   | 1.93   | -2.28  | -1.75  | 0.24   | -0.78  | 0.49   | -0.35  |
| -2.04  | 2.25   | -1.93  | -8.15  | -2.00  | -25.86 | -21.50 | -20.18 | -24.30 | -16.72 | -17.66 | -22.14 | -17.08 | -20.60 | 1.23   | -0.07  | 2.51   | 1.45   | -0.85  | 1.97   | 2.41   | 1.50   | -1.56  | -4.38  | -2.78  | -1.79  | -2.48  | -2.26  |
| 0.99   | -5.38  | -0.18  | 1.17   | -1.96  | -2.90  | -6.80  | -3.82  | -1.26  | -2.11  | -2.54  | -2.14  | -3.07  | -2.48  | 0.37   | 1.34   | 3.39   | 2.29   | 5.91   | 0.84   | 0.75   | 0.48   | -1.67  | 2.23   | 1.60   | 2.16   | 1.70   | 2.24   |
| -17.63 | -17.37 | -21.92 | -17.82 | -18.64 | -14.79 | -9.12  | -11.33 | -11.40 | -10.49 | -8.95  | -10.14 | -7.89  | -8.95  | -15.57 | -14.48 | -19.67 | -16.21 | -15.68 | -20.77 | -18.29 | -20.34 | -15.23 | -16.90 | -19.35 | -17.62 | -19.71 | -21.10 |
| 0.49   | 1.50   | 2.84   | 0.68   | 2.63   | -0.21  | 0.35   | 0.92   | 0.28   | 1.80   | 4.00   | -0.12  | 0.24   | 0.55   | 1.25   | 2.72   | 2.86   | 2.32   | 1.74   | 3.55   | 2.20   | 3.06   | 0.79   | 2.30   | 2.10   | 2.62   | 1.55   | 1.50   |
| 1.11   | 1.06   | 0.60   | 1.28   | 3.95   | -3.49  | -1.98  | -2.97  | -3.38  | -1.14  | 2.42   | -3.23  | -1.68  | -1.32  | 1.60   | 3.02   | 4.26   | 1.81   | 4.39   | 4.13   | 4.83   | 3.94   | 2.22   | 3.31   | 4.63   | 1.13   | 4.64   | 1.28   |
| -0.81  | -0.93  | 1.32   | -0.17  | 1.35   | -0.96  | -0.26  | 0.88   | -1.46  | 0.51   | 0.81   | -1.14  | -0.79  | -0.41  | -0.54  | -1.28  | -1.13  | -0.41  | -1.14  | 1.08   | -0.82  | 1.16   | -2.26  | -1.50  | -0.61  | -0.18  | -1.10  | -0.17  |
| -1.15  | -1.17  | -1.72  | 0.08   | -0.35  | -1.08  | 0.12   | 0.77   | 0.61   | 0.21   | 0.28   | -0.18  | 1.35   | -0.30  | -1.09  | -0.72  | -0.67  | -1.10  | 0.14   | -0.44  | 0.20   | -0.66  | -1.16  | -2.08  | 0.25   | -1.06  | 0.00   | -0.33  |
| 0.90   | 2.08   | 3.76   | 1.16   | 1.08   | -0.33  | 0.01   | 0.72   | 0.24   | -0.18  | 2.56   | -0.53  | 1.07   | 0.46   | 0.80   | 2.12   | 2.22   | 2.94   | 2.28   | 2.96   | 1.88   | 2.00   | -0.52  | 3.38   | 2.39   | 2.01   | 1.40   | 4.17   |
| -15.83 | -1.61  | 2.40   | -7.64  | -8.70  | -5.23  | -2.98  | -3.07  | -7.72  | -6.26  | -4.12  | -5.73  | -7.58  | -2.78  | -6.00  | -12.19 | -15.20 | -4.83  | -11.76 | -0.22  | -12.41 | -10.83 | -1.76  | 0.49   | -1.79  | 0.82   | 1.82   | -0.40  |
| -14.64 | -5.07  | 7.99   | -5.81  | -6.09  | -5.82  | -7.74  | -3.40  | -8.68  | -9.41  | -7.48  | -8.41  | -12.47 | -5.59  | -12.16 | -22.34 | -22.10 | -11.96 | -17.31 | -7.03  | -19.45 | -16.03 | 0.36   | 2.12   | -1.08  | 0.72   | 1.59   | 0.88   |
| -11.37 | -6.32  | 11.53  | -2.86  | -4.14  | -7.48  | -12.98 | -7.91  | -14.24 | -15.92 | -12.10 | -13.81 | -20.47 | -8.79  | -24.67 | -33.20 | -33.23 | -20.48 | -26.92 | -13.29 | -31.27 | -25.83 | -1.10  | 0.94   | -1.02  | -1.10  | 3.06   | 1.25   |
| -7.63  | -13.10 | -6.97  | -0.47  | -4.66  | 2.26   | 5.16   | 3.26   | 0.89   | 2.55   | 3.79   | 1.57   | 1.17   | 2.53   | 5.84   | 6.16   | 4.74   | 5.76   | 4.99   | 5.86   | 6.41   | 5.03   | 2.95   | 7.78   | 5.65   | 4.66   | 4.40   | 6.27   |
| -11.51 | -15.60 | -10.61 | -2.45  | -6.57  | 2.71   | 5.27   | 3.22   | 2.87   | 2.86   | 4.24   | 1.68   | 1.04   | 1.99   | 7.40   | 7.94   | 8.12   | 5.03   | 5.98   | 8.01   | 6.24   | 7.50   | 4.90   | 6.79   | 6.54   | 6.49   | 3.68   | 4.61   |
| -9.64  | -13.77 | -7.63  | -12.00 | -10.43 | -6.54  | -12.07 | -8.96  | -8.59  | -5.57  | -8.21  | -5.20  | -2.48  | -5.77  | -17.96 | -23.80 | -18.20 | -15.34 | -17.94 | -15.54 | -16.88 | -18.77 | -14.54 | -23.41 | -18.46 | -13.11 | -11.37 | -15.14 |
| 2.05   | -1.63  | 0.88   | 1.56   | 0.41   | 2.97   | 1.69   | 2.43   | -0.17  | 2.93   | 2.28   | 3.09   | 2.68   | 2.09   | 1.31   | 3.37   | 1.99   | 2.64   | 1.47   | 2.64   | 2.24   | 4.58   | 0.48   | 5.00   | 3.48   | 2.99   | 2.52   | 3.62   |
| 2.75   | -4.52  | 0.35   | 18.55  | 11.11  | 50.10  | 43.32  | 44.93  | 54.62  | 40.51  | 45.18  | 52.52  | 38.28  | 39.44  | 10.77  | 5.18   | 7.95   | 9.13   | 18.28  | 11.81  | 6.04   | 9.68   | 12.50  | 16.43  | 21.61  | 21.68  | 18.06  | 19.34  |
| 1.75   | -0.89  | -0.54  | 2.42   | -5.21  | 5.19   | 4.14   | 3      |        |        |        |        |        |        |        |        |        |        |        |        |        |        |        |        |        |        |        |        |

|        |        |        |        |        |        |        |        |        |        |        |        |        |        |        |        |        |        |        |        |        |        |        |        |        |        |        |        |
|--------|--------|--------|--------|--------|--------|--------|--------|--------|--------|--------|--------|--------|--------|--------|--------|--------|--------|--------|--------|--------|--------|--------|--------|--------|--------|--------|--------|
| 3.23   | 4.93   | 3.71   | 1.64   | 3.09   | -1.15  | 1.16   | 1.24   | 0.15   | 1.51   | 0.71   | 0.62   | 0.34   | -1.53  | 5.46   | 5.24   | 6.26   | 4.48   | 2.84   | 5.62   | 4.26   | 6.18   | 3.52   | 5.54   | 5.72   | 4.05   | 3.95   | 5.15   |
| 2.41   | 4.35   | 3.67   | 0.92   | 2.25   | 1.81   | 1.32   | 1.62   | 2.23   | 2.11   | 1.09   | 1.67   | 2.11   | 1.72   | 0.80   | 1.29   | -0.22  | 0.43   | -0.57  | 1.86   | 1.13   | 0.61   | 0.42   | -0.50  | 1.34   | 0.81   | 1.66   | 1.46   |
| 1.70   | -0.98  | 4.13   | 3.59   | 2.95   | 0.61   | -0.03  | 1.18   | 1.36   | 2.57   | 1.67   | 0.87   | 0.81   | -0.10  | 2.23   | 2.74   | 6.31   | 3.30   | 3.08   | 4.68   | 3.48   | 2.91   | 3.80   | 1.51   | 4.45   | 1.35   | 5.05   | 4.60   |
| 4.34   | -0.22  | 3.11   | 16.93  | 10.50  | 0.01   | 5.23   | 3.50   | 2.31   | 4.30   | 3.21   | 0.62   | 0.58   | -0.18  | 20.87  | 22.18  | 23.63  | 18.58  | 22.02  | 21.87  | 23.66  | 21.85  | 20.73  | 25.67  | 27.90  | 21.04  | 19.61  | 20.70  |
| 7.46   | -14.52 | 2.74   | 24.41  | 16.03  | 2.19   | 9.01   | 5.73   | 3.86   | 5.23   | 6.61   | 2.96   | 1.28   | 0.55   | 40.64  | 39.45  | 40.77  | 37.63  | 40.95  | 42.12  | 40.79  | 40.39  | 35.74  | 41.63  | 44.04  | 38.98  | 35.73  | 37.81  |
| -12.58 | -16.74 | -11.67 | -14.36 | -11.77 | -1.98  | -3.21  | -1.74  | -2.66  | -1.66  | -1.44  | -2.54  | -0.43  | -2.01  | -11.54 | -15.36 | -11.66 | -10.87 | -12.03 | -9.86  | -11.23 | -11.78 | -10.46 | -14.96 | -14.22 | -11.08 | -11.65 | -12.68 |
| -9.24  | -11.50 | -3.34  | 2.46   | -2.75  | 2.15   | 4.04   | 1.47   | 3.07   | 2.96   | 1.72   | 1.52   | 1.73   | 0.09   | 0.74   | 2.06   | 2.80   | 1.23   | 1.95   | 1.46   | 1.53   | 0.47   | 0.79   | 2.06   | 4.19   | 2.90   | 3.85   | 3.07   |
| -9.89  | -12.48 | -3.10  | 7.52   | -2.17  | 6.23   | 7.46   | 7.43   | 7.95   | 7.86   | 7.41   | 7.19   | 6.89   | 4.01   | 3.59   | 6.31   | 3.30   | 6.04   | 4.01   | 2.71   | 2.70   | 2.92   | 5.46   | 8.20   | 6.19   | 6.72   | 5.35   |        |
| -15.00 | -20.37 | -14.61 | -28.94 | -10.83 | -15.26 | -13.89 | -16.41 | -18.09 | -11.87 | -18.34 | -16.71 | -10.97 | -10.30 | -9.07  | -9.66  | -9.68  | -7.73  | -12.64 | -4.11  | -6.54  | -8.57  | -9.09  | -11.55 | -13.61 | -12.48 | -12.28 | -10.79 |
| 2.30   | 3.97   | 1.06   | 1.70   | 2.34   | -2.51  | -0.41  | -1.78  | -1.63  | 0.71   | 0.32   | -1.49  | -0.32  | -0.72  | 2.16   | 1.41   | 3.66   | 3.40   | 5.00   | 2.64   | 1.85   | 1.14   | -0.63  | 1.78   | 2.65   | 0.63   | 2.55   | 0.48   |
| 0.53   | 0.72   | 0.98   | -0.60  | 0.11   | -1.59  | -0.60  | -2.49  | -2.28  | 0.73   | -0.95  | -1.54  | -0.19  | -1.10  | 0.50   | -2.05  | -0.09  | 0.05   | -0.80  | -0.76  | 0.50   | 0.64   | -0.72  | -0.14  | 1.24   | -0.38  | -0.09  | 0.70   |
| 1.76   | 1.99   | 2.17   | 1.93   | 3.34   | -2.24  | -0.36  | -0.43  | -2.49  | -0.12  | -0.43  | -1.63  | 0.34   | -0.99  | 0.63   | 2.76   | 2.56   | 2.79   | 3.59   | 2.74   | 0.74   | -0.57  | 3.27   | 2.08   | 1.11   | 1.26   | 2.34   |        |
| 1.06   | 3.31   | 1.37   | -0.15  | -1.59  | -3.23  | -1.66  | -1.78  | -2.94  | -0.66  | -2.11  | -2.86  | -0.53  | -1.35  | 1.77   | 4.27   | 4.10   | 1.51   | 3.60   | 2.78   | 4.66   | 3.98   | -12.72 | -12.24 | -12.49 | -13.95 | -7.31  | -12.27 |
| -0.53  | 0.43   | -0.32  | -0.41  | 1.77   | -2.51  | -1.48  | -2.92  | -4.04  | -1.24  | -1.47  | -3.09  | -2.12  | -2.36  | 1.86   | 1.70   | 1.77   | 2.86   | 1.40   | 2.61   | 1.52   | 1.23   | -0.35  | 0.45   | 3.47   | 1.38   | 0.17   | -1.10  |
| 1.14   | 2.12   | 1.13   | 0.66   | 0.41   | -6.68  | -6.11  | -6.35  | -5.57  | -5.58  | -4.00  | -6.42  | -4.84  | -3.41  | 5.18   | 4.79   | 5.21   | 4.65   | 4.25   | 4.16   | 3.94   | 2.79   | 10.56  | 12.86  | 9.28   | 9.70   | 11.15  | 8.20   |
| 1.31   | 3.81   | 4.24   | 2.16   | 2.11   | -0.09  | 0.74   | 1.19   | -0.86  | 1.65   | 1.97   | 0.49   | 1.56   | 0.43   | 1.61   | 1.22   | 2.04   | 2.30   | 2.97   | 1.80   | 3.63   | 2.27   | 0.92   | 3.74   | 1.28   | 1.70   | 2.34   | 3.78   |
| 0.90   | 2.54   | 2.92   | 1.60   | 1.66   | 0.64   | 0.56   | 1.10   | 0.08   | 0.79   | 0.66   | -0.39  | 0.77   | 1.11   | 1.78   | 1.86   | 2.21   | 2.21   | 1.87   | 2.67   | 1.64   | 3.10   | 2.48   | 1.67   | 3.70   | 2.21   | 3.29   | 2.36   |
| 0.48   | 3.22   | 2.80   | 4.41   | 2.05   | -0.47  | 0.55   | -0.01  | -0.99  | 1.47   | 0.66   | -0.02  | 0.19   | 0.14   | 1.76   | 2.15   | 1.67   | 2.40   | 1.41   | 1.06   | 2.25   | 0.80   | 0.92   | 2.34   | 2.97   | 3.05   | 1.78   | 2.05   |
| -3.30  | -7.84  | -2.52  | -1.89  | -1.30  | -1.14  | -0.47  | 0.36   | -0.27  | 0.79   | -0.12  | -1.41  | -0.17  | -1.30  | 1.03   | 0.83   | 0.48   | 1.29   | 0.43   | 0.67   | 0.18   | 1.42   | -0.53  | -2.30  | -1.97  | 0.93   | 0.43   | 1.12   |
| -1.39  | -3.09  | 0.18   | -0.88  | -0.26  | -1.40  | 0.25   | 0.45   | -1.50  | 0.73   | -0.77  | -0.31  | 0.14   | -0.48  | -2.64  | -5.09  | -2.02  | -2.78  | -2.91  | -2.19  | -2.42  | -2.03  | -2.38  | -5.81  | -1.81  | -2.57  | -1.24  | -1.39  |
| 4.41   | 4.04   | 1.99   | 1.75   | 1.89   | -0.70  | -0.92  | -0.12  | -0.57  | -0.45  | 1.41   | -0.45  | 0.43   | -1.26  | 1.52   | 3.17   | 3.05   | 2.69   | 2.19   | 3.02   | 3.28   | 2.77   | 2.61   | 3.97   | 4.29   | 1.54   | 5.17   | 3.78   |
| -1.22  | 7.74   | -1.02  | -3.63  | 2.81   | -0.90  | -2.82  | -1.69  | -2.73  | -1.91  | -1.62  | -3.01  | -0.41  | -0.96  | -3.99  | -3.63  | -0.92  | -1.36  | -1.92  | -3.43  | -2.38  | -2.12  | -2.47  | -5.43  | -4.32  | -1.81  | -1.69  | -2.99  |
| 2.97   | 3.93   | 2.40   | 2.31   | 2.96   | -0.58  | 0.91   | 1.12   | 0.65   | 1.10   | 0.09   | 0.66   | 0.05   | -0.14  | 3.24   | 2.18   | 3.09   | 2.15   | 2.47   | 3.01   | 2.20   | 3.25   | 0.87   | 2.51   | 3.63   | 3.76   | 2.16   | 2.76   |
| -0.07  | -0.23  | 0.73   | 1.28   | 0.89   | -0.91  | -0.24  | 0.64   | -0.33  | 0.39   | 1.43   | 0.39   | -0.38  | -0.51  | 0.50   | 1.06   | 1.62   | 1.49   | -0.74  | 0.92   | 1.73   | 0.81   | 1.65   | 0.82   | 0.73   | 0.06   | 1.37   | 0.62   |
| -3.50  | -11.74 | 0.16   | 5.00   | -3.03  | 5.37   | 7.07   | 6.84   | 7.39   | 7.35   | 7.77   | 5.02   | 7.76   | 3.97   | 1.09   | 2.59   | 3.79   | 1.28   | 5.88   | 4.09   | 3.07   | 3.84   | 4.45   | 4.49   | 6.56   | 5.90   | 2.61   | 5.29   |
| -6.10  | -10.17 | 0.97   | 9.81   | -7.16  | 7.66   | 11.15  | 10.87  | 9.98   | 10.86  | 10.88  | 8.85   | 8.76   | 6.08   | 3.12   | 3.49   | 3.76   | 1.91   | 4.55   | 1.91   | 1.33   | 5.52   | 5.68   | 4.37   | 6.09   | 5.06   | 4.46   | 4.84   |
| -18.77 | -30.61 | -16.52 | -36.10 | -17.06 | -21.71 | -22.88 | -22.74 | -24.49 | -20.06 | -22.66 | -23.76 | -18.75 | -15.10 | -11.39 | -10.67 | -11.35 | -9.93  | -16.28 | -7.75  | -5.73  | -11.08 | -11.41 | -14.14 | -17.42 | -16.93 | -21.25 | -14.86 |
| -2.94  | 0.10   | -2.97  | -9.16  | -3.46  | -12.40 | -10.39 | -10.42 | -12.15 | -9.70  | -9.16  | -12.77 | -7.65  | -7.97  | -0.38  | -0.65  | 0.79   | 0.08   | -3.47  | 0.17   | 0.46   | 0.90   | -3.19  | -4.63  | -3.05  | -2.16  | -1.58  | -2.05  |
| -5.66  | 0.10   | -4.11  | -15.27 | -4.32  | -24.30 | -20.16 | -19.29 | -24.61 | -15.74 | -16.55 | -21.63 | -15.26 | -18.74 | -3.58  | -5.03  | -0.99  | -0.98  | -7.45  | -0.50  | 0.00   | -2.85  | -4.41  | -9.31  | -5.88  | -4.55  | -5.01  | -4.75  |
| -0.74  | -4.66  | -2.69  | -2.23  | -1.74  | -2.61  | -5.19  | -2.88  | 0.33   | -2.56  | -1.66  | -0.67  | -3.30  | -2.35  | 0.68   | 2.01   | 3.43   | 2.14   | 3.70   | 1.37   | 1.19   | 0.01   | -1.66  | 3.03   | 1.41   | 1.85   | 1.91   | 1.46   |
| -19.08 | -19.40 | -23.39 | -19.45 | -19.58 | -16.09 | -10.70 | -12.74 | -11.74 | -10.24 | -10.50 | -10.67 | -8.83  | -9.15  | -16.22 | -16.22 | -19.40 | -18.08 | -16.68 | -21.61 | -20.21 | -22.52 | -16.83 | -18.45 | -21.95 | -19.52 | -20.70 | -22.60 |
| 0.95   | 2.16   | 2.85   | 1.29   | 2.64   | 0.77   | 1.47   | 1.09   | -0.06  | 0.91   | 1.10   | -0.14  | 0.54   | 0.14   | 1.74   | 2.19   | 2.66   | 2.39   | 2.48   | 3.27   | 1.77   | 3.00   | 0.58   | 1.80   | 2.98   | 2.82   | 2.36   | 1.92   |
| 0.50   | 1.91   | 2.05   | 1.96   | 3.59   | -2.78  | -1.91  | -1.44  | -3.92  | -2.43  | -2.18  | -3.01  | -1.36  | -1.22  | 2.63   | 4.40   | 4.88   | 2.89   | 3.16   | 4.42   | 5.16   | 3.84   | 2.81   | 3.51   | 5.06   | 1.86   | 3.66   | 3.41   |
| -1.07  | 0.67   | 1.54   | -0.51  | 0.71   | -1.87  | -0.83  | 0.86   | -1.83  | -0.90  | 0.44   | -1.76  | -0.70  | -0.23  | 0.57   | -1.30  | -1.04  | 0.30   | -0.95  | 1.20   | -0.42  | 0.36   | -1.92  | -1.70  | -0.87  | 0.39   | -1.24  | -0.11  |
| -1.45  | -0.22  | -0.80  | 0.44   | -0.13  | -1.48  | 0.06   | 0.32   | 0.18   | -0.03  | 0.72   | -0.04  | 0.55   | -0.29  | -1.13  | -0.43  | -0.73  | -1.12  | 0.70   | -0.71  | 0.35   | 0.18   | -0.90  | -1.35  | -0.02  | -1.21  | -0.52  | -0.35  |
| 0.37   | 2.44   | 2.63   | 2.09   | 1.75   | -0.23  | -0.09  | 0.25   | 0.26   | 1.30   | 0.29   | -0.87  | 0.36   | 0.95   | 0.60   | 2.05   | 2.28   | 2.54   | 1.72   | 2.50   | 1.46   | 0.44   | -0.57  | 3.71   | 1.66   | 0.56   | 2.05   | 4.07   |
| -14.09 | -1.57  | 3.30   | -6.46  | -8.43  | -4.94  | -3.44  | -1.91  | -6.70  | -5.88  | -4.95  | -5.94  | -7.45  | -2.96  | -5.32  | -13.03 | -15.57 | -5.49  | -13.93 | -1.21  | -14.27 | -9.04  | -1.44  | 0.88   | 1.63   | 1.01   | 2.84   | -0.92  |
| -12.47 | -3.62  | 8.76   | -5.25  | -6.57  | -6.64  | -7.84  | -3.74  | -8.17  | -10.31 | -7.48  | -7.79  | -12.45 | -5.57  | -17.73 | -24.13 | -22.86 | -14.21 | -19.53 | -8.28  | -23.67 | -15.24 | 0.30   | 1.01   | 2.06   | 0.83   | 0.54   | -0.59  |
| -9.87  | -5.38  | 12.45  | -2.65  | -4.10  | -11.24 | -12.10 | -6.74  | -14.21 | -15.20 | -12.17 | -13.30 | -19.87 | -8.64  | -27.40 | -36.96 | -33.30 | -23.93 | -29.94 | -15.48 | -34.43 | -26.00 | -0.28  | -0.36  | 1.63   | -0.59  | 2.83   | -0.03  |
| -8.62  | -12.21 | -7.68  | 0.88   | -2.48  | -0.13  | 3.13   | 1.96   | -0.46  | 1.28   | 1.20   | -0.23  | -1.04  | 0.32   | 8.64   | 10.09  | 8.06   | 7.09   | 8.27   | 8.70   | 9.62   | 7.08   | 5.54   | 9.66   | 9.31   | 6.99   | 8.19   | 8.06   |
| -10.86 | -14.54 | -10.56 | -1.59  | -6.28  | 0.54   | 2.15   | 1.37   | 0.77   | 1.40   | 1.78   | -0.65  | -0.91  | -0.88  | 10.97  | 12.07  | 10.86  | 7.53   | 8.38   | 10.21  | 9.18   | 10.57  | 6.74   | 9.91   | 8.26   | 9.15   | 8.31   | 8.04   |
| -14.62 | -15.43 | -10.73 | -17.55 | -13.80 | -2.92  | -6.59  | -5.17  | -3.69  | -0.55  | -3.91  | -2.14  | 2.88   | 0.30   | -24.58 | -31.23 | -24.23 | -20.30 | -22.10 | -19.72 | -24.10 | -24.87 | -21.53 | -29.88 | -26.19 | -18.59 | -13.82 | -20.39 |
| 1.70   | -0.91  | 1.03   | 1.59   | 1.65   | 2.70   | 1.82   | 2.64   | 1.41   | 3.21   | 1.47   | 2.60   | 2.23   | 2.37   | 2.64   | 3.94   | 3.24   | 4.29   | 2.40   | 2.97   | 2.65   | 5.02   | 2.29   | 5.83   | 3.98   | 2.87   | 5.58   | 3.62   |
| 6.83   | 2.75   | 8.36   | 41.93  | 22.38  | 46.63  | 40.04  | 41.46  | 51.54  | 36.84  | 40.63  | 49.71  | 33.89  | 34.52  | 22.97  | 12.47  | 17.72  | 15.79  | 32.26  | 18.58  | 12.73  | 19.79  | 20.53  | 26.03  | 31.08  | 29.26  | 27.72  | 28.97  |
| 2.12   | -1.50  | 1.48   | 3.89   | -5.99  | 4.31   | 3.15   | 2.63   | 3.40   | 7.62   | 5.33   | 3.67   | 6.33   | 5.24   | -1.32  | 0.76   | -0.86  | 2.03   | 0.23   | 1.07   | 1.26   | -0.43  | 2.09   | 0.31   | 2.99   | 0.68   | 1.41   | 1.72   |
| 1.79   | 0.14   | 1.27   | -2.86  | 0.19   | -4.66  | -2.71  | -1.26  | -3.50  | -1.51  | -3.50  | -3.75  | -2.53  | -2.54  | -2.46  | 2.19   | -1.54  | -1.83  | -4.91  | -2.89  | -2.80  | -1.10  | -1.81  | -2.77  | -3.35  | -2.50  | -4.62  | -2.54  |
| 1.19   | 0.94   | -0.31  | -3.19  | -0.28  | -4.17  | -4.82  | -3.09  | -4.16  | -2.23  | -2.57  | -3.79  | -2.35  | -1.76  | -2.69  | -4.05  | -2.09  | -3.26  | -4.83  | -4.06  | -4.48  | -3.82  | -3.75  | -4.10  | -3.63  | -4.10  | -3.63  | -1.06  |
| 1.84   | -1.67  | -0.24  | 0.84   | 2.0    |        |        |        |        |        |        |        |        |        |        |        |        |        |        |        |        |        |        |        |        |        |        |        |

|        |        |        |        |        |        |        |        |        |        |        |        |        |        |        |        |        |        |        |        |        |        |        |        |        |        |        |        |       |
|--------|--------|--------|--------|--------|--------|--------|--------|--------|--------|--------|--------|--------|--------|--------|--------|--------|--------|--------|--------|--------|--------|--------|--------|--------|--------|--------|--------|-------|
| 9.63   | 4.33   | 8.46   | 24.11  | 16.02  | -2.43  | 3.13   | 0.86   | -0.07  | 1.92   | 1.66   | -0.76  | -2.14  | -3.06  | 24.23  | 26.06  | 27.95  | 22.73  | 26.58  | 28.22  | 27.37  | 25.67  | 25.20  | 28.65  | 32.61  | 25.59  | 24.48  | 24.33  |       |
| 15.15  | -7.07  | 9.57   | 35.66  | 27.02  | -1.44  | 4.14   | 0.97   | 0.50   | 0.26   | 1.91   | -0.12  | -3.01  | -3.54  | 48.08  | 44.33  | 49.59  | 45.61  | 48.83  | 51.23  | 49.81  | 49.26  | 43.98  | 46.90  | 53.76  | 45.89  | 45.49  | 46.18  |       |
| -14.19 | -20.93 | -14.94 | -19.07 | -17.68 | -0.15  | -2.28  | -0.14  | -2.88  | 0.59   | -0.77  | -0.60  | 0.23   | 0.24   | -13.95 | -15.24 | -15.53 | -13.29 | -15.57 | -13.17 | -13.90 | -14.57 | -12.00 | -15.97 | -16.96 | -12.88 | -15.15 | -14.23 |       |
| -8.32  | -10.30 | -4.66  | 4.49   | -0.09  | 0.94   | 3.78   | 0.54   | 1.74   | 2.63   | 0.81   | 1.29   | 1.23   | 0.01   | 1.42   | 3.12   | 3.67   | 2.27   | 3.11   | 2.52   | 2.19   | 2.34   | 1.82   | 2.83   | 5.74   | 4.76   | 4.57   | 4.92   |       |
| -8.97  | -11.70 | -2.76  | 11.10  | 2.94   | 4.60   | 5.97   | 5.26   | 6.05   | 6.63   | 6.38   | 6.27   | 5.55   | 3.28   | 6.34   | 6.45   | 9.80   | 5.64   | 9.99   | 6.80   | 4.81   | 5.16   | 4.61   | 7.48   | 10.32  | 9.90   | 9.70   | 8.57   |       |
| -22.71 | -24.46 | -21.30 | 36.97  | -21.46 | -12.86 | -11.78 | -12.32 | -15.59 | -6.83  | -13.67 | -14.34 | -9.10  | -8.63  | 17.71  | -16.36 | -16.46 | -13.61 | -19.51 | -11.32 | -12.03 | -14.90 | -12.41 | -17.23 | -19.17 | -16.08 | -18.28 | -17.74 |       |
| 1.66   | 3.49   | 2.39   | 2.14   | 1.59   | -2.19  | -0.01  | -1.17  | -2.92  | 1.57   | -0.17  | -2.22  | 0.05   | -0.55  | 0.70   | 1.84   | 2.31   | 3.42   | 1.34   | 1.99   | 1.16   | 1.17   | -0.60  | 1.42   | 2.78   | 1.02   | 2.50   | 1.02   |       |
| 0.94   | 0.95   | 0.31   | 0.07   | 1.57   | -1.96  | -0.74  | -2.49  | -1.38  | -1.10  | -0.55  | -1.53  | 0.21   | -1.09  | -0.30  | -1.46  | 0.30   | -0.01  | -0.33  | 0.24   | 0.83   | 0.56   | -1.05  | 0.37   | 1.54   | 0.05   | 0.28   | 0.19   |       |
| 1.37   | 3.37   | 2.69   | 2.09   | 2.23   | -2.13  | -0.86  | -0.50  | -2.24  | -0.22  | -0.34  | -1.67  | -0.13  | -0.88  | 1.57   | 1.97   | 2.37   | 3.66   | 1.18   | 3.24   | 1.49   | 1.16   | 0.77   | 3.17   | 2.65   | 1.32   | 2.20   | 2.09   |       |
| 1.25   | 3.91   | 1.55   | 0.28   | -0.66  | -2.56  | -0.38  | -1.93  | -3.10  | -1.30  | -2.08  | -1.84  | -0.48  | -0.68  | 2.07   | 4.72   | 4.90   | 1.26   | 3.50   | 3.40   | 4.32   | 4.63   | -13.21 | -12.34 | -15.14 | -14.37 | -7.01  | -11.43 |       |
| -0.17  | 1.14   | -0.13  | 0.14   | 2.03   | -2.61  | -2.06  | -3.04  | -3.71  | -1.26  | -1.10  | -3.77  | -1.99  | -2.17  | 1.84   | 5.19   | 2.28   | 3.63   | 1.79   | 3.27   | 2.00   | 1.64   | 0.01   | 1.35   | 3.19   | 1.40   | 0.11   | 0.08   |       |
| 1.62   | 3.05   | 0.77   | 1.75   | 0.22   | -6.33  | -5.93  | -5.61  | -6.22  | -4.74  | -4.70  | -6.00  | -6.45  | -4.22  | 4.85   | 6.57   | 6.46   | 4.55   | 4.72   | 5.41   | 3.88   | 4.41   | 10.81  | 13.14  | 7.70   | 9.74   | 12.61  | 9.84   |       |
| 2.07   | 4.30   | 3.88   | 2.50   | 2.17   | -0.09  | 1.41   | 1.70   | -0.45  | 2.70   | 1.32   | 0.61   | 2.93   | 0.95   | 1.36   | 1.39   | 2.31   | 1.93   | 2.27   | 2.80   | 2.93   | 1.66   | 1.10   | 4.64   | 1.64   | 1.23   | 2.27   | 3.16   |       |
| 0.39   | 2.45   | 3.97   | 1.13   | 2.49   | -0.37  | 0.47   | 1.37   | 0.60   | 0.28   | 1.39   | -0.07  | 0.74   | 0.94   | 1.58   | 1.81   | 1.88   | 2.12   | 1.79   | 2.29   | 2.14   | 2.86   | 1.84   | 2.21   | 3.84   | 2.46   | 2.59   | 2.37   |       |
| 1.29   | 3.63   | 2.64   | 2.06   | 2.50   | -0.64  | 1.22   | 4.40   | -1.12  | 1.28   | 1.39   | -0.21  | -0.47  | 0.03   | 1.03   | 1.22   | 1.33   | 1.73   | 1.17   | 1.31   | 2.51   | 0.94   | 1.83   | 2.29   | 2.07   | 2.39   | 3.95   | 3.48   |       |
| -4.64  | -3.30  | -3.12  | -2.41  | -0.21  | -1.70  | -0.66  | 0.21   | -1.45  | 0.48   | 0.31   | -1.26  | -0.52  | -0.54  | -0.83  | -0.25  | -0.05  | 0.51   | 0.64   | 0.47   | -0.68  | 1.30   | -0.55  | -2.63  | -0.26  | 0.33   | 1.11   | 1.73   |       |
| -3.00  | 3.03   | -0.91  | -3.03  | -0.45  | -0.92  | 0.47   | 0.03   | -0.43  | 0.68   | -0.28  | -0.03  | -0.11  | -1.06  | -5.14  | -0.06  | -4.47  | -4.24  | -1.15  | -4.49  | -5.09  | -3.97  | -1.30  | -0.55  | -8.04  | -4.57  | -3.92  | -2.09  | -3.41 |
| 2.66   | 21.41  | 2.41   | 1.05   | 2.12   | -0.74  | 0.40   | -0.19  | -1.22  | -0.40  | 1.50   | -0.04  | 1.24   | -0.04  | 1.85   | 6.29   | 3.63   | 3.44   | 3.22   | 3.67   | 4.92   | 4.54   | 3.39   | 4.06   | 4.67   | 3.31   | 4.97   | 3.98   |       |
| -3.92  | 2.30   | 2.24   | -4.50  | -3.82  | -0.22  | -1.03  | -0.30  | -0.12  | -0.48  | -0.93  | 0.28   | 2.30   | 0.71   | -5.66  | -4.04  | -4.59  | -2.44  | -2.50  | -4.08  | -3.45  | -3.57  | -4.34  | -6.55  | -4.62  | -4.23  | -3.44  | -3.51  |       |
| 2.89   | 5.22   | 3.11   | 2.88   | 3.43   | -1.23  | 0.39   | 0.72   | 0.32   | 0.50   | 0.12   | 0.07   | -0.53  | -0.70  | 3.32   | 2.44   | 3.74   | 2.37   | 2.38   | 3.18   | 3.28   | 3.92   | 1.48   | 2.95   | 3.47   | 4.15   | 1.94   | 3.14   |       |
| -1.97  | 1.38   | 0.18   | 1.40   | 0.80   | -2.00  | -1.89  | -0.50  | -1.73  | -0.52  | -1.49  | 0.57   | -0.02  | -0.45  | 0.57   | 3.03   | 1.86   | 2.37   | -1.25  | -0.21  | 0.59   | 1.17   | 1.67   | 1.46   | 1.66   | 0.05   | 0.89   | 1.48   |       |
| -1.96  | -10.48 | 2.31   | 15.04  | 4.19   | 4.29   | 5.35   | 5.84   | 5.40   | 5.99   | 5.83   | 4.00   | 6.66   | 2.96   | 4.45   | 4.70   | 7.39   | 3.17   | 11.17  | 7.59   | 4.09   | 6.26   | 6.76   | 7.00   | 9.62   | 9.23   | 6.45   | 9.23   |       |
| -4.16  | -8.05  | 2.08   | 19.25  | -1.25  | 5.81   | 8.85   | 8.28   | 7.34   | 8.39   | 8.98   | 6.43   | 6.27   | 4.56   | 5.92   | 6.76   | 7.14   | 5.77   | 8.48   | 4.51   | 3.82   | 7.91   | 8.00   | 6.76   | 10.41  | 8.50   | 7.48   | 7.43   |       |
| -29.51 | -37.50 | -26.69 | -46.91 | -35.12 | -18.02 | -20.65 | -19.99 | -20.03 | -17.49 | -18.86 | -19.52 | -16.00 | -10.57 | -21.19 | -18.19 | -22.50 | -19.22 | -25.27 | -16.43 | -12.59 | -21.47 | -18.40 | -20.76 | -24.84 | -23.80 | -27.91 | -21.64 |       |
| -6.19  | -4.77  | -4.75  | -12.70 | -6.07  | -12.10 | -9.71  | -8.86  | -11.75 | -9.18  | -9.68  | -10.72 | -6.98  | -7.57  | -6.81  | -5.98  | -3.72  | -3.06  | -8.43  | -2.34  | -2.24  | -4.14  | -6.30  | -8.34  | -6.21  | -4.73  | -4.31  | -3.98  |       |
| -10.23 | -4.01  | -8.54  | -23.54 | -11.40 | -22.22 | -17.77 | -17.91 | -22.87 | -13.43 | -14.46 | -20.96 | -13.37 | -16.41 | -11.92 | -14.30 | -8.37  | -7.80  | -16.26 | -6.42  | -5.81  | -9.58  | -10.37 | -16.33 | -13.03 | -9.26  | -9.39  | -9.83  |       |
| -1.46  | -8.38  | -3.38  | -3.58  | -4.28  | -2.32  | -5.52  | -2.56  | 1.02   | -1.81  | -1.43  | -0.11  | -2.12  | -1.12  | 1.39   | 2.78   | 2.58   | 1.76   | 2.19   | 1.82   | 1.19   | 0.79   | -1.04  | 3.10   | 0.12   | 2.26   | 1.56   | 0.81   |       |
| -20.87 | -19.95 | -26.59 | -20.86 | -21.48 | -16.21 | -11.52 | -13.84 | -13.35 | -11.70 | -10.92 | -11.48 | -9.17  | -10.33 | -17.39 | -17.12 | -22.04 | -19.33 | -19.04 | -24.45 | -21.63 | -24.60 | -18.83 | -19.19 | -24.18 | -21.40 | -22.12 | -24.78 |       |
| 1.26   | 2.17   | 4.11   | 2.17   | 3.15   | -0.46  | 0.81   | 1.30   | 0.26   | 1.26   | 0.79   | -0.32  | 0.94   | 0.84   | 2.00   | 0.99   | 2.50   | 2.93   | 2.48   | 4.01   | 1.99   | 3.23   | 0.79   | 2.84   | 3.36   | 3.10   | 2.13   | 2.13   |       |
| 1.39   | 3.04   | 2.38   | 2.81   | 3.82   | -1.43  | -2.24  | -2.32  | -2.23  | -1.38  | -1.73  | -1.81  | -1.37  | -1.24  | 2.11   | 4.45   | 5.02   | 1.87   | 4.68   | 3.63   | 5.43   | 5.21   | 2.76   | 5.57   | 4.84   | 2.29   | 5.18   | 3.45   |       |
| -0.51  | -0.34  | 1.97   | 0.97   | 1.34   | -2.38  | 0.43   | 0.57   | -1.80  | -0.73  | -0.58  | -2.43  | -0.50  | -0.70  | -0.33  | -1.22  | -1.79  | 0.11   | -0.63  | 1.47   | -1.23  | 0.17   | -2.18  | -0.74  | -1.52  | -0.95  | 0.40   | -0.33  |       |
| -1.06  | 0.56   | 0.40   | 0.40   | 0.99   | -1.23  | -0.17  | 0.34   | -0.31  | 0.19   | 0.73   | -0.56  | 0.03   | -1.37  | -1.06  | -0.62  | -0.35  | 0.44   | -0.71  | 0.25   | 0.65   | -0.44  | -2.07  | 0.43   | -0.66  | 0.47   | -0.32  | -0.32  |       |
| 2.04   | 3.29   | 3.32   | 2.51   | 1.17   | 0.61   | 0.27   | 0.37   | 1.10   | 0.83   | 1.46   | 0.78   | 3.22   | -1.45  | 2.26   | 1.53   | 1.93   | 2.80   | 2.82   | 2.77   | 0.97   | 1.92   | 0.00   | 3.93   | 3.83   | 1.34   | 1.78   | 4.01   |       |
| -16.12 | 0.54   | 3.01   | -6.21  | -8.72  | -4.56  | -3.17  | -2.42  | -7.94  | -5.95  | -3.19  | -4.94  | -7.63  | -3.17  | -6.33  | -14.46 | -18.22 | -5.81  | -13.83 | -1.63  | -15.62 | -11.02 | -2.03  | -3.09  | -0.41  | 1.15   | 1.91   | 1.91   |       |
| -14.38 | -1.51  | 8.53   | -5.78  | -4.65  | -5.03  | -7.53  | -3.70  | -9.26  | -8.48  | -8.12  | -7.55  | -11.70 | -5.75  | -14.34 | -26.40 | -25.93 | -14.57 | -21.42 | -9.44  | -25.30 | -16.85 | 0.09   | 0.40   | -1.76  | 0.13   | 1.24   | 4.43   |       |
| -12.16 | -3.21  | 11.79  | -3.93  | -4.47  | -6.79  | -11.17 | -5.43  | -13.78 | -12.72 | -12.07 | -11.82 | -19.44 | -7.18  | -29.98 | -38.68 | -36.93 | -27.07 | -33.08 | -17.97 | -37.22 | -28.28 | -0.80  | -2.35  | -1.68  | -0.59  | 3.20   | 2.55   |       |
| -7.45  | -12.34 | -7.17  | 2.43   | -4.15  | -1.89  | 1.52   | 0.50   | -1.64  | -0.21  | -0.43  | -1.51  | -2.49  | -1.57  | 11.70  | 12.85  | 10.47  | 9.70   | 10.29  | 11.88  | 12.53  | 10.50  | 9.10   | 14.10  | 12.60  | 9.37   | 10.29  | 11.63  |       |
| -11.35 | -16.08 | -11.00 | 0.03   | -3.50  | -1.43  | 0.02   | 0.06   | -1.63  | -0.84  | -0.30  | -2.13  | -2.59  | -1.53  | 14.23  | 16.18  | 14.70  | 10.52  | 11.16  | 13.63  | 12.95  | 13.74  | 9.19   | 14.49  | 12.85  | 11.63  | 10.75  | 10.52  |       |
| -18.70 | -19.28 | -15.93 | -25.58 | -18.64 | -0.74  | -2.69  | 0.61   | -0.88  | 2.73   | 1.40   | 2.05   | 5.36   | 3.93   | -33.01 | -39.65 | -31.63 | -27.59 | -28.37 | -27.88 | -31.50 | -31.29 | -28.14 | -37.95 | -33.87 | -24.50 | -20.48 | -27.82 |       |
| 3.91   | -0.16  | 1.85   | 4.00   | 3.57   | 2.35   | 1.46   | 1.65   | -0.20  | 2.87   | 2.84   | 1.91   | 1.22   | 1.36   | 3.79   | 6.53   | 3.11   | 3.74   | 3.61   | 4.87   | 3.74   | 6.73   | 2.52   | 7.43   | 5.15   | 4.20   | 3.23   | 5.28   |       |
| 9.56   | 12.55  | 20.57  | 55.26  | 56.70  | 41.40  | 36.10  | 37.81  | 48.20  | 33.56  | 35.61  | 45.92  | 29.77  | 29.77  | 43.50  | 29.79  | 35.27  | 32.77  | 52.25  | 33.78  | 29.88  | 35.45  | 32.79  | 41.09  | 46.61  | 41.41  | 39.90  | 43.03  |       |
| 0.20   | -1.13  | 1.47   | 2.82   | -7.58  | 4.14   | 3.49   | 1.94   | 1.85   | 7.42   | 5.41   | 3.54   | 4.21   | 5.28   | -1.62  | -1.31  | -0.64  | 0.94   | -1.54  | 0.61   | 0.66   | -1.39  | -0.23  | -0.14  | 3.31   | 0.95   | 0.35   | 1.68   |       |
| -0.08  | -1.39  | 0.41   | -5.06  | -2.12  | -4.24  | -2.64  | -2.10  | -3.24  | -0.57  | 2.34   | -3.35  | -1.34  | -1.32  | -4.04  | -2.80  | -2.82  | -4.80  | -5.26  | -4.39  | -4.20  | -3.66  | -2.72  | -3.81  | -4.34  | -3.89  | -3.67  | -3.17  |       |
| -0.63  | -0.39  | -1.14  | -5.59  | -1.64  | -3.47  | -3.59  | -2.27  | -3.98  | -1.69  | -1.93  | -3.37  | -1.73  | -1.68  | -5.05  | -5.10  | -3.67  | -4.52  | -6.74  | -5.46  | -4.15  | -6.12  | -5.00  | -5.00  | -5.91  | -5.27  | -5.80  | -4.80  |       |
| 1.43   | -0.42  | -1.37  | -1.05  | 0.58   | -2.56  | -1.94  | -1.10  | -2.62  | -1.70  | -1.35  | -3.24  | 0.10   | -1.09  | -2.30  | -1.18  | -2.23  | -2.40  | -2.68  | -1.62  | -1.59  | -2.32  | -1.28  | 0.33   | -0.96  | -0.95  | 3.48   | -1.98  |       |
| 3.38   | 11.03  | 7.84   | 6.35   | 3.85   | -1.98  | -0.79  | -0.41  | -0.34  | -0.81  | -0.62  | -0.65  | 0.20   | -0.87  | 5.36   | 4.80   | 6.86   | 8.07   | 7.66   | 7.13   | 7.54   | 8.61   | 2.84   | 2.44   | 7.80   | 6.37   | 3.33   | 6.77   |       |
| 15.96  | 24.14  | 19.49  | 15.39  | 13.90  | -0.96  | 1.18   | 1.78   | 1.39   | 1.35   | 1.11   | 0.54   | 1.36   | 0.11   | 10.13  | 4.80   | 12.08  | 16.52  | 17.22  | 11.86  | 15.86  | 16.17  | 7.04   | 4.68   | 13.24  |        |        |        |       |



|        |        |        |        |        |        |        |        |        |        |        |        |        |        |        |        |        |        |        |        |        |        |        |        |        |        |        |        |      |
|--------|--------|--------|--------|--------|--------|--------|--------|--------|--------|--------|--------|--------|--------|--------|--------|--------|--------|--------|--------|--------|--------|--------|--------|--------|--------|--------|--------|------|
| -6.88  | -10.02 | -1.80  | 5.97   | 3.38   | 1.59   | 3.24   | 0.43   | 2.03   | 2.06   | 1.92   | 0.05   | 1.51   | 0.23   | 2.16   | 1.96   | 4.65   | 4.39   | 3.82   | 3.56   | 2.27   | 2.24   | 2.99   | 3.45   | 6.51   | 5.79   | 5.71   | 6.42   |      |
| -3.99  | -10.92 | 0.69   | 15.24  | 11.12  | 3.79   | 4.91   | 4.76   | 4.76   | 6.09   | 4.92   | 4.96   | 4.01   | 2.28   | 8.81   | 5.64   | 11.90  | 9.26   | 11.17  | 9.45   | 7.27   | 8.15   | 7.34   | 7.70   | 11.72  | 10.80  | 11.94  | 11.55  |      |
| -35.88 | -36.51 | -31.06 | -43.89 | -38.23 | -10.14 | -9.51  | -10.22 | -12.17 | -5.70  | -12.01 | -11.90 | -7.84  | -6.87  | -21.72 | -18.23 | -20.53 | -19.57 | -22.17 | -18.57 | -18.43 | -19.85 | -19.74 | -17.57 | -22.17 | -19.68 | -23.34 | -20.44 |      |
| 1.83   | 4.65   | 1.39   | 1.97   | 2.86   | -2.46  | -0.63  | -1.77  | -2.12  | 0.18   | 0.08   | -2.11  | -0.71  | -1.37  | 0.10   | 1.13   | 1.75   | 2.02   | 0.93   | 2.07   | 1.16   | 0.65   | -0.12  | 2.29   | 2.82   | 0.85   | 2.14   | 2.01   |      |
| 0.68   | 0.17   | 1.20   | 0.54   | 1.48   | -1.59  | -0.53  | -2.61  | -2.11  | -0.23  | -0.40  | -1.17  | 0.15   | -0.86  | -0.30  | -1.11  | -0.12  | 0.68   | -0.83  | -1.40  | 1.01   | 0.64   | -0.95  | 1.01   | 1.45   | 0.37   | -0.02  | -0.41  |      |
| 3.16   | 3.66   | 2.52   | 2.60   | 1.73   | -1.96  | -0.40  | -2.21  | -2.42  | -0.11  | -0.19  | -1.67  | -0.80  | -0.59  | 1.16   | 1.67   | 1.70   | 2.66   | 0.01   | 3.26   | 1.18   | 1.01   | 1.47   | 2.59   | 2.36   | 1.29   | 1.81   | 2.28   |      |
| 1.45   | 4.14   | 2.72   | 0.73   | -0.31  | -3.32  | -1.73  | -2.12  | -3.14  | -1.27  | -1.25  | -2.66  | -0.19  | -0.39  | 2.07   | 4.72   | 4.56   | 2.26   | 3.32   | 3.21   | 4.33   | 4.50   | -13.90 | -13.34 | -15.32 | -16.44 | -8.57  | -11.92 |      |
| 0.21   | 1.48   | 0.86   | 0.10   | 2.46   | -2.35  | -1.42  | -3.01  | -3.89  | -0.96  | -1.92  | -3.21  | -2.26  | -2.77  | 2.86   | 2.52   | 2.27   | 3.34   | 1.50   | 2.97   | 2.31   | 1.66   | 0.48   | 1.62   | 3.33   | 2.51   | 0.30   | 1.04   |      |
| 1.23   | 3.05   | 1.35   | 1.61   | -0.35  | -6.83  | -5.90  | -5.57  | -5.87  | -5.95  | -5.10  | -6.03  | -5.04  | -4.07  | 5.64   | 5.38   | 4.79   | 5.65   | 5.21   | 5.62   | 4.63   | 3.85   | 11.10  | 14.06  | 8.66   | 10.70  | 12.82  | 10.20  |      |
| 0.81   | 3.68   | 3.23   | 2.32   | 1.07   | -0.08  | 1.40   | 1.80   | -0.20  | 1.77   | 2.31   | 0.74   | 2.70   | 0.87   | 1.40   | 1.16   | 2.24   | 2.40   | 2.21   | 2.07   | 3.49   | 1.37   | 1.25   | 4.22   | 1.45   | 2.32   | 1.32   | 3.38   |      |
| 0.60   | 2.47   | 3.04   | 1.02   | 3.34   | -0.17  | 0.61   | 1.52   | 1.03   | 1.05   | 1.13   | 0.31   | 0.84   | 1.56   | 1.77   | 1.74   | 2.18   | 1.65   | 1.42   | 2.31   | 1.73   | 3.02   | 1.98   | 2.33   | 2.97   | 2.04   | 2.93   | 1.98   |      |
| 0.30   | 4.08   | 3.48   | 3.78   | 2.57   | -1.20  | 0.23   | 0.52   | -0.61  | 1.83   | 0.58   | -0.96  | 0.74   | 0.41   | 1.27   | 1.44   | 2.15   | 2.48   | 0.89   | 1.10   | 1.28   | 1.14   | 0.90   | 3.08   | 2.07   | 2.93   | 2.27   | 1.90   |      |
| -1.07  | -3.31  | -2.54  | -0.17  | -0.13  | -2.16  | -0.44  | 0.06   | -0.74  | 0.81   | 0.49   | -1.90  | -0.54  | -0.86  | -0.28  | -0.27  | -1.10  | 0.04   | 0.81   | 0.30   | -1.43  | 0.68   | -1.20  | -1.65  | -1.10  | 0.59   | 0.96   | 1.13   |      |
| 1.42   | 1.55   | -1.49  | -3.42  | -1.12  | -0.70  | 0.77   | 0.26   | -0.60  | 0.66   | 0.55   | 0.14   | 0.04   | 0.00   | -5.94  | -7.83  | -4.27  | -5.01  | -3.68  | -4.88  | -6.21  | -4.62  | -7.00  | -8.88  | -5.71  | -4.59  | -3.50  | -5.08  |      |
| 5.87   | 20.77  | 2.12   | 4.83   | 2.86   | -1.07  | -0.47  | -0.20  | -1.46  | 0.10   | 0.24   | 0.45   | 0.57   | -0.68  | 2.48   | 4.40   | 3.54   | 3.11   | 1.15   | 5.03   | 5.38   | 4.50   | 4.76   | 4.29   | 5.42   | 3.31   | 5.72   | 4.09   |      |
| -4.60  | -0.71  | -4.06  | -5.56  | -4.68  | 0.37   | 0.83   | -0.12  | 1.60   | 1.46   | 1.05   | 1.78   | 3.42   | 2.28   | -5.88  | -4.19  | -3.97  | -3.96  | -2.68  | -4.31  | -3.20  | -4.08  | -6.13  | -6.87  | -5.57  | -3.70  | -3.57  | -3.70  |      |
| 3.35   | 5.48   | 3.59   | 3.15   | 4.18   | -0.83  | -0.19  | 0.61   | -0.16  | 0.21   | -0.57  | -0.20  | -1.59  | -1.34  | 3.33   | 2.19   | 3.56   | 3.25   | 2.15   | 3.88   | 3.08   | 4.00   | 2.08   | 3.78   | 3.39   | 3.50   | 2.48   | 3.01   |      |
| -2.10  | -1.43  | -0.50  | 0.63   | 0.88   | -1.29  | -1.76  | 0.29   | -1.43  | -0.15  | -0.29  | -0.10  | -0.08  | -0.51  | 0.82   | 2.88   | 2.04   | 1.39   | -0.56  | 1.38   | 1.34   | 0.85   | 1.32   | 1.35   | 1.03   | 0.03   | 1.16   | 0.59   |      |
| 4.49   | -5.42  | 9.91   | 23.81  | 17.58  | 2.38   | 4.47   | 4.64   | 4.47   | 4.97   | 5.32   | 2.91   | 5.35   | 2.02   | 7.72   | 6.47   | 11.10  | 6.97   | 12.11  | 10.33  | 7.67   | 10.39  | 10.75  | 7.36   | 14.23  | 12.44  | 10.14  | 11.45  |      |
| 1.29   | -5.70  | 9.37   | 28.45  | 10.14  | 5.16   | 6.90   | 6.39   | 5.09   | 6.06   | 7.28   | 4.81   | 4.41   | 3.13   | 9.00   | 7.39   | 10.36  | 9.50   | 10.83  | 8.13   | 7.30   | 10.66  | 12.04  | 8.74   | 13.38  | 11.10  | 12.62  | 12.01  |      |
| -45.28 | -51.38 | -39.54 | -54.54 | -60.30 | -16.38 | -15.85 | -16.89 | -16.66 | -11.52 | -15.97 | -15.08 | -11.75 | -7.77  | -28.23 | -22.42 | -28.85 | -27.52 | -32.28 | -25.64 | -22.08 | -28.36 | -25.78 | -24.52 | -30.68 | -29.56 | -35.96 | -30.37 |      |
| -11.23 | -8.26  | -8.21  | -17.38 | -13.91 | -10.88 | -8.85  | -8.54  | -10.48 | -7.96  | -8.24  | -9.78  | -5.88  | -6.25  | -13.47 | -11.50 | -8.95  | -10.44 | -11.46 | -8.43  | -8.54  | -10.97 | -12.32 | -11.85 | -10.79 | -9.21  | -8.18  | -4.42  |      |
| -19.14 | -11.81 | -16.41 | -30.34 | -26.10 | -20.87 | -16.52 | -16.28 | -21.08 | -12.23 | -13.26 | -19.65 | -11.77 | -14.28 | -21.29 | -22.35 | -17.10 | -17.47 | -20.33 | -15.10 | -15.39 | -18.16 | -17.79 | -21.87 | -19.40 | -14.07 | -14.04 | -15.39 |      |
| -5.45  | -8.23  | -2.26  | -5.27  | -5.93  | -1.45  | -3.52  | -2.62  | 0.14   | -0.98  | -0.20  | -0.19  | -0.82  | -1.08  | 0.77   | 1.83   | 0.90   | -0.68  | 2.06   | -0.27  | 2.24   | -1.41  | -1.12  | 1.93   | -1.63  | 0.77   | -0.14  | 0.29   |      |
| -22.33 | -21.63 | -27.36 | -23.18 | -22.66 | -17.39 | -12.56 | -15.64 | -15.20 | -12.63 | -13.06 | -12.72 | -12.02 | -10.90 | -18.95 | -19.16 | -21.95 | -21.06 | -20.39 | -26.09 | -24.54 | -27.29 | -20.39 | -20.92 | -24.73 | -22.38 | -24.64 | -26.28 |      |
| 1.43   | 2.70   | 3.94   | 1.84   | 3.31   | -0.48  | 1.37   | 0.99   | 1.28   | 1.95   | 0.75   | 0.12   | 0.66   | 0.72   | 2.19   | 2.23   | 2.87   | 3.32   | 2.11   | 2.92   | 3.04   | 3.85   | 1.26   | 2.60   | 3.46   | 2.34   | 2.78   | 2.40   |      |
| 3.04   | 2.91   | 2.48   | 2.67   | 5.28   | -2.19  | -0.85  | -1.88  | -1.94  | -0.68  | -2.38  | -3.00  | -1.26  | -1.76  | 3.64   | 4.84   | 5.11   | 2.96   | 5.38   | 5.43   | 7.24   | 4.87   | 3.03   | 5.06   | 6.73   | 3.33   | 4.37   | 3.30   |      |
| -0.80  | 1.19   | 3.01   | 0.18   | 2.60   | -2.53  | -0.16  | 0.20   | -1.79  | 0.22   | -0.38  | -2.17  | -0.71  | -0.77  | 0.95   | -0.63  | -1.19  | 1.12   | 0.25   | 0.62   | -0.89  | 0.95   | -1.80  | -1.51  | -0.90  | -1.08  | 0.09   | -0.50  |      |
| -0.68  | 0.48   | 0.08   | 1.33   | 1.41   | -1.49  | 0.17   | 0.54   | 0.43   | -0.48  | 0.12   | -0.62  | 0.04   | -0.84  | -0.81  | -0.86  | -0.41  | -0.64  | -0.17  | -0.23  | -0.01  | -0.08  | -0.73  | -1.46  | -0.27  | -0.43  | -0.12  | 0.40   |      |
| 0.97   | 3.74   | 3.71   | 1.88   | 2.40   | 0.92   | 0.50   | 0.18   | 0.46   | -0.24  | 1.29   | -0.24  | 0.28   | -0.17  | 0.27   | 1.46   | 2.22   | 3.62   | 1.73   | 3.66   | 1.06   | 1.55   | -1.05  | 3.37   | 3.13   | 1.53   | 1.55   | 3.08   |      |
| -16.11 | 3.48   | 2.46   | -7.62  | -9.14  | -4.81  | -2.92  | -2.12  | -8.01  | -5.56  | -4.47  | -4.57  | -6.61  | -2.23  | -9.43  | -16.34 | -19.27 | -6.88  | -15.70 | -2.77  | -16.83 | -12.54 | -0.58  | 1.05   | -1.46  | -0.50  | -0.58  | -1.80  |      |
| -14.52 | 2.10   | 6.92   | -7.06  | -4.83  | -5.39  | -6.84  | -2.89  | -9.12  | -8.56  | -8.11  | -7.07  | -11.19 | -5.19  | -17.67 | -28.76 | -28.01 | -17.07 | -23.45 | -11.81 | -25.52 | -18.25 | -1.38  | -1.66  | -1.23  | -0.10  | -1.01  | 0.87   |      |
| -12.32 | 0.34   | 10.21  | -5.90  | -4.53  | -5.58  | -10.03 | -5.05  | -13.74 | -13.24 | -10.45 | -11.42 | -18.77 | -7.53  | -32.75 | -42.61 | -41.21 | -29.03 | -34.62 | -20.70 | -38.68 | -32.82 | -1.54  | -6.65  | -1.22  | -0.72  | 0.86   | -0.54  |      |
| -6.93  | -11.74 | -6.82  | 4.26   | 0.01   | -2.49  | -0.83  | -0.09  | -3.04  | -1.53  | -0.80  | -3.03  | -3.13  | -2.42  | 13.74  | 13.03  | 11.78  | 10.20  | 10.13  | 12.70  | 14.36  | 11.64  | 12.93  | 15.33  | 13.86  | 10.89  | 13.05  | 14.02  |      |
| -10.18 | -14.19 | -9.34  | 2.18   | -1.59  | -1.92  | -1.10  | -1.94  | -2.36  | -0.98  | -1.24  | -2.75  | -3.81  | -4.18  | 15.71  | 15.66  | 15.44  | 11.50  | 11.52  | 14.89  | 13.83  | 14.91  | 13.88  | 16.63  | 14.52  | 12.27  | 14.19  | 12.81  |      |
| -24.78 | -26.36 | -22.24 | -30.57 | -23.92 | 2.79   | 0.69   | 3.15   | 2.26   | 6.09   | 5.33   | 4.61   | 8.86   | 7.55   | -33.92 | -39.44 | -31.56 | -27.66 | -26.35 | -30.93 | -33.39 | -32.81 | -36.25 | -41.52 | -38.19 | -26.25 | -23.99 | -31.98 |      |
| 5.88   | -0.14  | 2.90   | 3.37   | 2.81   | 2.43   | 1.74   | 2.02   | -0.13  | 1.78   | 2.18   | 1.85   | 1.57   | 2.20   | 4.25   | 7.91   | 6.07   | 5.36   | 3.19   | 4.93   | 4.38   | 6.91   | 3.31   | 7.46   | 4.56   | 4.02   | 3.50   | 4.01   |      |
| 34.85  | 33.63  | 41.59  | 60.90  | 77.71  | 36.77  | 31.91  | 32.82  | 43.52  | 29.85  | 30.99  | 41.39  | 24.99  | 24.82  | 55.30  | 45.53  | 48.54  | 50.23  | 57.79  | 49.63  | 48.54  | 52.32  | 46.00  | 48.26  | 55.98  | 49.94  | 51.02  | 54.58  |      |
| 0.29   | -1.33  | -2.50  | 2.55   | -6.93  | 2.59   | 3.21   | 3.56   | 2.39   | 6.23   | 5.99   | 2.88   | 4.41   | 3.17   | -1.30  | -2.57  | -1.17  | 0.75   | -2.10  | 2.19   | 0.41   | 1.11   | -3.16  | 0.15   | 1.45   | 1.63   | 1.36   | 1.18   | 0.37 |
| -3.14  | -3.01  | -2.41  | -7.74  | -4.36  | -2.54  | -1.58  | -1.79  | -2.37  | 0.33   | -1.12  | -1.68  | -0.36  | -0.92  | -4.93  | -3.43  | -2.50  | -5.53  | -6.40  | -5.79  | -5.19  | -4.12  | -3.58  | -4.24  | -5.51  | -4.95  | -4.57  | -4.34  |      |
| -3.74  | -3.12  | -3.12  | -8.23  | -5.48  | -2.90  | -3.19  | -3.02  | -2.75  | -1.18  | -1.52  | -2.57  | -0.99  | -0.65  | -5.76  | -5.82  | -5.57  | -6.05  | -7.47  | -6.66  | -5.36  | -7.72  | -6.17  | -4.92  | -7.08  | -6.41  | -7.10  | -6.37  |      |
| 0.88   | -2.08  | -2.84  | -2.21  | -0.56  | -3.25  | -0.72  | -1.85  | -3.30  | -0.14  | -0.77  | -2.89  | 0.75   | -0.08  | -2.99  | -2.28  | -1.39  | -2.68  | -3.84  | -1.79  | -2.94  | -2.66  | -1.08  | -0.36  | -3.02  | -1.55  | 1.93   | -2.63  |      |
| 4.18   | 11.65  | 9.30   | 6.14   | 4.80   | -2.59  | -0.39  | -0.77  | -1.23  | -0.92  | -0.32  | -1.40  | 0.17   | -0.44  | 6.34   | 4.00   | 6.44   | 8.12   | 7.06   | 7.46   | 8.40   | 8.38   | 3.03   | 4.19   | 8.77   | 6.38   | 1.83   | 5.25   |      |
| 17.58  | 28.27  | 22.23  | 15.77  | 14.09  | -2.08  | 0.93   | 0.49   | 1.25   | 1.41   | 0.49   | -0.22  | -0.37  | -0.43  | 10.66  | 5.47   | 12.22  | 16.50  | 17.15  | 12.27  | 16.32  | 15.77  | 6.56   | 4.85   | 12.71  | 12.46  | 12.88  | 12.02  |      |
| -13.59 | -22.32 | -15.70 | -7.49  | -14.18 | -1.40  | -1.61  | -1.24  | -3.23  | -1.15  | -0.95  | -1.82  | -0.30  | -0.45  | -0.29  | 0.51   | -2.33  | -0.83  | 0.48   | -1.31  | -2.04  | -0.03  | -1.75  | -0.60  | -1.78  | -0.28  | 1.30   | -0.94  |      |
| 0.29   | 3.16   | 2.35   | 2.52   | 0.75   | -1.38  | -0.88  | 0.33   | -1.40  | 0.61   | -0.66  | -0.66  | -0.21  | 0.01   | 0.26   | 0.16   | -0.76  | 0.29   | 0.57   | 1.32   | 1.36   | 0.70   | -0.95  | -0.63  | 2.05   | 0.52   | 1.79   | 1.77   |      |
| -0.54  | 1.57   | 0.82   | 2.82   | 2.46   | -1.43  | -1.19  | -0.72  | -0.38  | -1.20  | -0.07  | -1.42  | -0.51  | -0.73  | -1.08  | -1.33  | -1.24  | -0.86  | 0.75   | 0.10   | -1.50  | -0.61  | -0.38  | -0.37  | 0.     |        |        |        |      |

|        |        |        |        |        |        |        |        |        |        |        |        |        |        |        |        |        |        |        |        |        |        |        |        |        |         |        |        |       |
|--------|--------|--------|--------|--------|--------|--------|--------|--------|--------|--------|--------|--------|--------|--------|--------|--------|--------|--------|--------|--------|--------|--------|--------|--------|---------|--------|--------|-------|
| 1.20   | 4.79   | 1.29   | 1.96   | 2.45   | -2.44  | -0.69  | -1.10  | -2.07  | 1.49   | -0.10  | -2.09  | -0.21  | -1.06  | 1.39   | 2.11   | 3.07   | 2.40   | -0.45  | 2.72   | -0.57  | 1.56   | -1.37  | 2.60   | 2.68   | 1.01    | 2.87   | 0.66   |       |
| 0.45   | 0.09   | 0.36   | 0.11   | 0.60   | -2.16  | -0.24  | -2.27  | -1.83  | -1.15  | -0.14  | -1.55  | 0.08   | -0.74  | -0.60  | -1.33  | 0.41   | 0.48   | -0.33  | -0.63  | 1.21   | 0.92   | -0.03  | 0.16   | 0.73   | 0.11    | -0.59  | -0.04  |       |
| 3.42   | 3.27   | 1.09   | 1.70   | 1.83   | -1.50  | -0.76  | -1.01  | -2.29  | -0.50  | -0.11  | -1.82  | -0.52  | -0.93  | 2.77   | 3.26   | 2.64   | 2.70   | 0.66   | 4.10   | 2.07   | 1.61   | 1.44   | 1.66   | 3.32   | 2.04    | 1.27   | 1.23   |       |
| 1.92   | 2.50   | 1.95   | 1.27   | -0.75  | -3.19  | -1.70  | -3.04  | -2.74  | -1.13  | -0.97  | -1.68  | -0.51  | -0.78  | 1.67   | 4.91   | 5.92   | 2.27   | 4.47   | 3.64   | 4.30   | 5.33   | -13.81 | -13.56 | -15.05 | -16.52  | -8.13  | -12.99 |       |
| -0.43  | 1.14   | -0.46  | -0.04  | 1.75   | -2.06  | -1.33  | -2.57  | -3.48  | -0.52  | -1.77  | -3.48  | -2.26  | -3.03  | 2.02   | 2.05   | 2.22   | 3.35   | 2.07   | 3.34   | 2.44   | 1.83   | 0.51   | 1.50   | 2.92   | 2.45    | 0.50   | -0.09  |       |
| 2.19   | 3.66   | 2.43   | 2.22   | -5.00  | -5.89  | -6.23  | -7.14  | -6.03  | -6.25  | -5.38  | -6.07  | -5.26  | -4.52  | 5.01   | 6.49   | 5.23   | 5.66   | 5.12   | 4.53   | 4.88   | 4.47   | 11.94  | 14.12  | 9.61   | 11.48   | 14.55  | 10.42  |       |
| 0.88   | 2.73   | 2.49   | 1.09   | 0.63   | -0.01  | 0.48   | 2.06   | 0.09   | 2.94   | 1.63   | 1.51   | 3.23   | 1.36   | 1.48   | 1.80   | 2.10   | 2.36   | 3.00   | 3.08   | 2.76   | 2.18   | 1.31   | 3.35   | 1.33   | 1.29    | 2.00   | 2.57   |       |
| -0.23  | 1.34   | 2.57   | 1.09   | 1.48   | 0.02   | 1.43   | 1.77   | 0.99   | 0.76   | 1.93   | 0.50   | 0.65   | 1.54   | 1.40   | 1.43   | 1.83   | 2.27   | 1.95   | 2.31   | 2.23   | 2.47   | 2.19   | 2.36   | 3.42   | 2.30    | 2.25   | 2.38   |       |
| -0.64  | 2.57   | 3.45   | 3.03   | 1.73   | -1.29  | 0.83   | 0.84   | -0.39  | 1.53   | 1.81   | -0.21  | 0.08   | 0.43   | 1.52   | 2.21   | 2.64   | 1.90   | 1.54   | 0.72   | 2.63   | 1.31   | 1.17   | 3.13   | 2.20   | 3.46    | 2.36   | 3.82   |       |
| -5.39  | -4.30  | -3.08  | -4.06  | -5.57  | -1.89  | -0.46  | 0.54   | -1.30  | 1.01   | 0.57   | -1.13  | -0.29  | -1.08  | -1.15  | 0.19   | -0.34  | 1.46   | 0.90   | 1.31   | -0.38  | 1.00   | -1.54  | -1.54  | -1.39  | -0.08   | 0.27   | 0.43   |       |
| -4.39  | -0.28  | -3.00  | -5.18  | -1.88  | -0.87  | 0.72   | 0.85   | -0.34  | 0.92   | -0.12  | 0.93   | -0.02  | -1.11  | -3.52  | -3.26  | -2.10  | -3.35  | -1.67  | -2.59  | -2.99  | -2.31  | -6.25  | -5.34  | -3.36  | -2.62   | -3.23  | -2.79  |       |
| 5.37   | 22.52  | 2.70   | 3.96   | 2.50   | -0.74  | 0.59   | 0.02   | 0.05   | 1.35   | 1.90   | -0.81  | 1.74   | -0.31  | 2.82   | 3.40   | 2.79   | 2.43   | 2.15   | 3.41   | 3.25   | 2.88   | 4.38   | 4.63   | 4.47   | 2.12    | 5.23   | 4.50   |       |
| -4.93  | -3.03  | -4.05  | -6.63  | -8.01  | 2.15   | 1.21   | 2.20   | 2.77   | 2.84   | 2.16   | 2.25   | 4.19   | 3.86   | -5.05  | -3.09  | -1.99  | -1.80  | -1.08  | -3.26  | -3.00  | -2.77  | -6.24  | -5.34  | -5.18  | -3.43   | -5.77  | -4.03  |       |
| 6.36   | 6.04   | 4.42   | 3.54   | 4.51   | -1.70  | 0.29   | -0.32  | -0.37  | 0.37   | -0.73  | -0.43  | -1.18  | -1.89  | 3.03   | 1.73   | 3.22   | 2.70   | 1.80   | 3.31   | 2.69   | 4.44   | 2.30   | 2.43   | 4.20   | 4.33    | 2.70   | 3.06   |       |
| -0.70  | -1.80  | 0.70   | 1.98   | 1.98   | -1.12  | -1.58  | -0.14  | -1.25  | -0.82  | 0.01   | -0.46  | -0.12  | -1.31  | 0.35   | 2.66   | 0.86   | 2.10   | 0.57   | -0.90  | 0.62   | 1.28   | 1.44   | 1.73   | 1.19   | 0.32    | 2.30   | 0.19   |       |
| 17.14  | 5.19   | 22.01  | 27.84  | 27.50  | 1.78   | 3.34   | 3.37   | 3.44   | 3.81   | 4.32   | 3.30   | 4.15   | 1.01   | 7.54   | 5.02   | 9.56   | 8.91   | 11.84  | 9.67   | 7.82   | 10.10  | 12.87  | 6.84   | 9.89   | 13.83   | 11.22  | 12.73  |       |
| 10.38  | 1.06   | 19.43  | 33.68  | 20.62  | 4.03   | 5.60   | 0.04   | 4.79   | 5.55   | 5.75   | 4.04   | 3.44   | 2.59   | 9.64   | 7.03   | 9.80   | 9.56   | 10.70  | 8.98   | 8.30   | 10.57  | 14.91  | 7.56   | 11.31  | 12.59   | 12.80  | 11.39  |       |
| -60.92 | -66.37 | -54.17 | -60.12 | -68.04 | -12.12 | -12.87 | -12.97 | -14.42 | -9.71  | -12.99 | -13.17 | -8.51  | -6.49  | -28.42 | -20.78 | -29.68 | -26.63 | -30.52 | -27.48 | -24.58 | -27.45 | -29.54 | -23.42 | -33.08 | -29.55  | -34.99 | -30.43 |       |
| -18.43 | -15.91 | -16.65 | -18.44 | -17.86 | -10.23 | -7.19  | -7.55  | -9.73  | -7.21  | -7.17  | -10.13 | -5.85  | -5.13  | -16.11 | -11.07 | -9.41  | -12.50 | -11.19 | -10.85 | -12.80 | -11.65 | -25.62 | -12.78 | -12.48 | -12.48  | -10.66 | -11.37 |       |
| -31.69 | -28.22 | -28.89 | -31.08 | -34.28 | -18.98 | -14.23 | -14.12 | -19.25 | -10.36 | -11.77 | -17.42 | -9.59  | -11.82 | -25.11 | -23.41 | -20.29 | -21.54 | -19.79 | -19.81 | -20.21 | -22.57 | -23.84 | -21.86 | -21.07 | -17.72  | -16.07 | -18.77 |       |
| -6.96  | -10.50 | -6.26  | -4.74  | -4.76  | -1.12  | -3.96  | -0.38  | 0.60   | -0.52  | 0.72   | 0.25   | -0.23  | -1.56  | -0.30  | 1.70   | 0.81   | -0.61  | 2.96   | -0.11  | 0.70   | -1.89  | -2.17  | 1.97   | -0.10  | -1.13   | 0.78   | -1.60  |       |
| -24.39 | -23.63 | -28.85 | -24.63 | -25.45 | -20.16 | -13.15 | -16.61 | -16.33 | -13.64 | -14.39 | -13.04 | -11.94 | -11.77 | -20.90 | -20.70 | -24.28 | -21.52 | -23.87 | -27.20 | -25.99 | -27.83 | -21.20 | -23.37 | -27.02 | -21.30  | -26.88 | -28.91 |       |
| 1.70   | 1.25   | 3.47   | 1.72   | 3.77   | 0.46   | 0.77   | 1.92   | 1.10   | 1.72   | 1.28   | -0.03  | 1.02   | 0.50   | 2.35   | 2.03   | 3.52   | 2.70   | 3.17   | 3.86   | 2.78   | 3.23   | 1.25   | 2.94   | 3.35   | 3.05    | 2.88   | 2.42   |       |
| 2.99   | 4.19   | 3.54   | 3.88   | 5.51   | -2.53  | -0.46  | -1.61  | -3.04  | -0.87  | -1.78  | -2.21  | -1.37  | -2.18  | 3.37   | 4.54   | 5.96   | 4.18   | 6.25   | 5.73   | 7.69   | 6.26   | 3.74   | 4.76   | 7.31   | 3.62    | 5.61   | 4.30   |       |
| -0.70  | 0.02   | 1.45   | -0.28  | 1.18   | -1.87  | 0.75   | 0.75   | -1.95  | -0.78  | -1.17  | -2.46  | -0.65  | 0.72   | -0.06  | -0.88  | -1.03  | 1.25   | 0.12   | -0.14  | -0.91  | 0.75   | -1.59  | -1.55  | -2.80  | -0.79   | 0.07   | -1.35  |       |
| -0.45  | 0.01   | 0.67   | 1.08   | 2.00   | -1.55  | -0.46  | 0.23   | 0.59   | 0.30   | -0.03  | -0.27  | 0.25   | -1.95  | -0.78  | -0.99  | -0.75  | -0.64  | 0.83   | 0.18   | -0.63  | 0.20   | -0.26  | -1.94  | 0.24   | -0.69   | 0.38   | 0.16   |       |
| 1.30   | 3.60   | 4.19   | 1.98   | 2.32   | -0.81  | 0.08   | 0.01   | 0.66   | -0.03  | 0.55   | -0.75  | 0.03   | 0.16   | -0.07  | 1.87   | 2.60   | 2.45   | 2.61   | 2.98   | 2.62   | 0.19   | -0.88  | 5.31   | 3.14   | 1.94    | 2.40   | 2.75   |       |
| -17.60 | 1.78   | 3.64   | -8.08  | -10.24 | -4.47  | -2.88  | -1.54  | -7.65  | -4.65  | -3.86  | -5.09  | -6.12  | -2.34  | -9.90  | -18.55 | -21.06 | 9.30   | -17.11 | -4.45  | -17.17 | -12.28 | -1.26  | -0.92  | -3.59  | -0.95   | 0.91   | -1.72  |       |
| -16.51 | 0.25   | 9.07   | -7.77  | -6.60  | -4.16  | -6.96  | -2.61  | -8.76  | -7.64  | -7.41  | -7.09  | -10.87 | -4.85  | -20.78 | -30.85 | -29.54 | -18.97 | -25.08 | -13.66 | -27.20 | -20.67 | -2.41  | -4.45  | -4.77  | -0.39   | 0.38   | -0.38  |       |
| -13.48 | -1.53  | 10.24  | -7.85  | -5.14  | -4.46  | -9.14  | -4.45  | -13.31 | -11.49 | -10.13 | -11.48 | -16.28 | -7.21  | -35.60 | -46.10 | -43.65 | -32.39 | -36.81 | -22.35 | -41.27 | -34.44 | -5.87  | -11.26 | -4.64  | -1.76   | 2.23   | 0.03   |       |
| -6.07  | -10.53 | -4.78  | 4.70   | 0.73   | -2.14  | -1.30  | -2.28  | -3.67  | -1.25  | -2.16  | -3.35  | -3.55  | -2.43  | 10.06  | 7.93   | 7.94   | 7.99   | 9.05   | 9.96   | 9.55   | 7.53   | 13.76  | 11.53  | 10.67  | 9.32    | 12.39  | 10.89  |       |
| -10.03 | -13.81 | -8.62  | 3.16   | -0.97  | -2.63  | -2.17  | -1.97  | -2.97  | -1.88  | -2.23  | -3.46  | -4.34  | -4.73  | 12.55  | 9.58   | 11.53  | 9.15   | 9.07   | 12.29  | 10.37  | 10.79  | 14.74  | 11.35  | 11.48  | 10.88   | 13.80  | 9.57   |       |
| -28.47 | -34.46 | -28.62 | -34.45 | -26.25 | 4.56   | 3.80   | 4.00   | 3.87   | 6.28   | 6.12   | 6.52   | 10.52  | 10.63  | -28.19 | -25.09 | -22.05 | -20.91 | -24.13 | -24.93 | -24.97 | -38.03 | -32.78 | -29.26 | -22.93 | -24.72  | -25.50 |        |       |
| 6.09   | 0.48   | 4.30   | 2.90   | 3.52   | 1.03   | 0.95   | 1.59   | -0.47  | 2.73   | 1.94   | 1.87   | 2.95   | 1.17   | 4.24   | 8.90   | 5.52   | 5.72   | 3.63   | 4.40   | 4.63   | 6.06   | 2.98   | 6.33   | 4.38   | 4.32    | 3.32   | 4.57   |       |
| 62.92  | 50.39  | 58.92  | 62.28  | 79.43  | 32.95  | 27.31  | 29.63  | 39.39  | 24.53  | 26.71  | 37.37  | 20.36  | 20.17  | 55.65  | 43.01  | 47.89  | 48.62  | 55.75  | 51.53  | 50.65  | 51.62  | 51.37  | 46.49  | 53.35  | 51.23   | 51.91  | 54.39  |       |
| -0.49  | -2.31  | -0.54  | 2.77   | -3.80  | 2.30   | 2.01   | 3.33   | 1.49   | 5.88   | 3.18   | 2.08   | 4.52   | 3.77   | -1.00  | -3.72  | -2.39  | 1.74   | -0.98  | 0.37   | 1.39   | -2.01  | -1.28  | 0.36   | 1.03   | 0.07    | -0.30  | 0.69   |       |
| -6.80  | -9.85  | -4.18  | -8.41  | -8.95  | -2.20  | -1.25  | -1.23  | -1.43  | -0.02  | -0.99  | -1.75  | 0.07   | -0.43  | -5.12  | -3.26  | -2.80  | -3.52  | -5.64  | -6.01  | -4.25  | -3.87  | -3.39  | -3.22  | -5.01  | -4.79   | -5.17  | -4.48  |       |
| -7.89  | -8.56  | -6.81  | -10.07 | -7.83  | -1.99  | -2.26  | -1.28  | -2.44  | -0.46  | -0.52  | -1.93  | -0.50  | -0.17  | -5.60  | -5.25  | -4.67  | -5.68  | -6.55  | -5.92  | -4.22  | -6.63  | -6.77  | -4.80  | -5.77  | -5.82   | -7.46  | -5.97  |       |
| -2.88  | -5.30  | -2.55  | -3.91  | -2.34  | -1.57  | 0.00   | -0.09  | -1.56  | -0.70  | -0.50  | -3.07  | -0.30  | -0.30  | -2.56  | -0.85  | -2.21  | -3.46  | -3.11  | -2.46  | -1.68  | -1.61  | -4.11  | -0.58  | -2.68  | -1.67   | 1.54   | -2.77  |       |
| 4.56   | 11.79  | 8.17   | 6.35   | 4.91   | -1.82  | -1.04  | -1.49  | -1.40  | -1.53  | -0.75  | -1.94  | -0.69  | -0.61  | 6.10   | 4.12   | 6.81   | 7.66   | 7.58   | 6.25   | 8.09   | 8.46   | 2.70   | 3.88   | 6.65   | 5.68    | 7.46   | 5.94   |       |
| 17.77  | 28.87  | 21.94  | 15.51  | 12.99  | -2.89  | -0.25  | 0.74   | 0.54   | 0.79   | 0.04   | -0.16  | -0.16  | -1.42  | 10.36  | 6.26   | 12.01  | 16.46  | 17.02  | 12.70  | 15.65  | 16.10  | 7.81   | 5.17   | 12.90  | 13.16   | 13.48  | 11.42  |       |
| -14.51 | -21.57 | -15.01 | -7.96  | -13.26 | -1.07  | -1.24  | -0.90  | -2.27  | -0.23  | -0.88  | -3.30  | -0.42  | 0.88   | 0.04   | -0.13  | -1.81  | -1.26  | 1.44   | -0.42  | -0.85  | 1.28   | -2.08  | -0.35  | -1.88  | -0.06   | 1.16   | -0.17  |       |
| -0.10  | 0.74   | 2.04   | 2.74   | 1.11   | -0.59  | -0.83  | 1.06   | -1.30  | 0.68   | 0.19   | -0.69  | -0.27  | 0.52   | 1.75   | 0.18   | -0.41  | 0.46   | 0.76   | 2.04   | 0.28   | 1.20   | -0.76  | 0.21   | 1.85   | 0.64    | 1.74   | 1.37   |       |
| -0.83  | 0.81   | 0.94   | 2.55   | 1.87   | -1.12  | -1.01  | -0.80  | -0.28  | -0.79  | 0.37   | -1.41  | -0.48  | -0.24  | -1.98  | -1.57  | -1.79  | -0.71  | 1.10   | 0.30   | -2.06  | -0.87  | -0.58  | -1.31  | -0.16  | -0.41   | 2.40   | 1.61   |       |
| -3.55  | 0.72   | 1.86   | 2.04   | -1.99  | -4.28  | -3.55  | -1.11  | -2.84  | -1.13  | -0.78  | -2.77  | -2.23  | 0.17   | -5.42  | -5.56  | -5.84  | -5.26  | -5.62  | -4.46  | -9.15  | -5.57  | -5.50  | -3.96  | -2.03  | -4.13   | -2.77  | -0.40  | -3.43 |
| -2.27  | -8.51  | 6.83   | 14.79  | 14.07  | -4.49  | -4.82  | -3.11  | -2.90  | -3.28  | -3.54  | -4.16  | -6.48  | -7.43  | 22.69  | 22.89  | 18.61  | 16.25  | 16.41  | 20.46  | 17.08  | 19.81  | 34.58  | 29.22  | 25.23  | 17.69   | 23.12  | 22.17  |       |
| -6.62  | -12.08 | 5.64   | 16.21  | 14.06  | -4.41  | -4.63  | -4.70  | -4.10  | -5.36  | -5.11  | -5.37  | -6.97  | -8.11  | 20.77  | 20.08  | 18.99  | 15.24  | 15.99  | 20.16  | 17.70  | 17.89  | 30.58  | 25.08  | 20.95  | 17.48</ |        |        |       |

|        |        |        |        |        |        |        |        |        |        |        |        |        |        |        |        |        |        |        |        |        |        |        |        |        |        |        |        |       |
|--------|--------|--------|--------|--------|--------|--------|--------|--------|--------|--------|--------|--------|--------|--------|--------|--------|--------|--------|--------|--------|--------|--------|--------|--------|--------|--------|--------|-------|
| 1.83   | 3.39   | 1.74   | 1.14   | -1.00  | -3.52  | -1.36  | -1.87  | -2.87  | -1.48  | -1.14  | -2.72  | -0.94  | -0.02  | 2.31   | 5.02   | 4.98   | 2.03   | 3.28   | 3.97   | 4.88   | 4.85   | -14.42 | -12.88 | -13.97 | -16.49 | -8.26  | -13.14 |       |
| 0.67   | 0.57   | 0.15   | 0.83   | 2.17   | -2.30  | -1.07  | -2.74  | -3.58  | -0.99  | -1.41  | -2.98  | -1.84  | -2.18  | 2.36   | 2.20   | 2.17   | 3.37   | 1.55   | 3.06   | 2.31   | 1.80   | 0.70   | 1.43   | 4.28   | 2.48   | -0.27  | -0.17  |       |
| 1.85   | 2.84   | 2.18   | 1.46   | -0.03  | -6.32  | -6.26  | -7.00  | -7.01  | -5.97  | -5.24  | -5.44  | -5.09  | -3.95  | 5.89   | 5.62   | 6.88   | 5.19   | 5.91   | 6.00   | 4.56   | 4.89   | 11.42  | 14.13  | 9.99   | 11.57  | 13.35  | 9.99   |       |
| 0.67   | 2.02   | 2.18   | 1.79   | 0.75   | 1.67   | 1.05   | 1.47   | -0.33  | 2.94   | 3.13   | 0.86   | 4.14   | 2.08   | 1.41   | 2.50   | 1.84   | 2.47   | 3.58   | 3.40   | 2.62   | 2.02   | 1.42   | 4.40   | 2.72   | 2.77   | 1.60   | 4.21   |       |
| -1.07  | 0.85   | 2.49   | 0.48   | 1.26   | -0.50  | 1.79   | 1.99   | 1.32   | 1.03   | 1.64   | 1.10   | 0.79   | 1.88   | 1.43   | 1.73   | 2.20   | 1.98   | 1.92   | 2.29   | 2.08   | 2.97   | 2.36   | 2.41   | 2.73   | 2.05   | 2.80   | 2.43   |       |
| 0.15   | 2.40   | 2.94   | 2.78   | 1.01   | -0.32  | 1.82   | 0.37   | 0.29   | 2.87   | 1.53   | -0.44  | 0.96   | 0.93   | 1.47   | 2.15   | 2.28   | 2.32   | 1.28   | 1.33   | 1.79   | 0.76   | 1.32   | 2.39   | 2.66   | 3.86   | 2.94   | 3.03   |       |
| -4.97  | -5.66  | -2.56  | -3.30  | -0.54  | -1.74  | -0.19  | 0.97   | -0.77  | 0.84   | 0.41   | -1.63  | -0.90  | -0.43  | 0.09   | 0.48   | 0.50   | 1.41   | 1.40   | 1.33   | -0.42  | 1.92   | -0.76  | -2.07  | -0.53  | 1.01   | 0.10   | 0.68   |       |
| -4.72  | -0.46  | -3.90  | -6.11  | -1.70  | -0.92  | 0.87   | 0.33   | -0.14  | 1.21   | 0.23   | 0.73   | 0.11   | -0.19  | -1.53  | -2.45  | -0.88  | -1.60  | -1.37  | -1.32  | -0.54  | -1.10  | -3.57  | -2.39  | -1.06  | -1.72  | -1.39  | -0.89  |       |
| 5.17   | 21.88  | 4.83   | 2.97   | 2.95   | -0.70  | 0.77   | -0.18  | -1.03  | 0.44   | 0.22   | 0.52   | 0.62   | 0.24   | 1.78   | 2.90   | 2.08   | 2.50   | 1.37   | 3.83   | 2.21   | 2.27   | 2.92   | 7.79   | 3.66   | 1.63   | 5.09   | 2.99   |       |
| -3.80  | -3.57  | -4.71  | -7.12  | -9.98  | 3.51   | 2.48   | 2.59   | 4.08   | 4.56   | 3.94   | 3.03   | 6.30   | 4.47   | -3.38  | -1.57  | -1.46  | -1.36  | -1.64  | -1.87  | -1.63  | -0.88  | -4.12  | -4.77  | -3.42  | -2.10  | -1.18  | -3.20  |       |
| 7.17   | 6.06   | 4.42   | 4.16   | 5.18   | -2.43  | -0.67  | 0.06   | -0.16  | -0.39  | -1.49  | -1.10  | -1.70  | -1.20  | 2.78   | 2.02   | 3.52   | 2.65   | 2.20   | 3.28   | 2.40   | 3.81   | 1.99   | 1.87   | 3.47   | 3.50   | 1.99   | 3.03   |       |
| 0.54   | 0.24   | 0.72   | 1.16   | 2.28   | -0.35  | -1.64  | 0.14   | -0.84  | -0.35  | -0.68  | 0.57   | -0.34  | -0.12  | 0.34   | 1.06   | 0.07   | 1.66   | -0.83  | -0.57  | 0.43   | -0.12  | -0.65  | 1.67   | 0.77   | 0.92   | 0.93   | 0.41   |       |
| 24.26  | 18.51  | 29.14  | 31.32  | 31.31  | 2.10   | 3.18   | 2.54   | 2.74   | 2.83   | 3.25   | 2.39   | 2.07   | 1.28   | 7.11   | 4.12   | 7.98   | 6.66   | 11.92  | 9.26   | 6.94   | 8.00   | 11.65  | 6.64   | 9.48   | 12.01  | 9.50   | 10.52  |       |
| 17.35  | 6.41   | 26.94  | 36.96  | 25.89  | 3.38   | 3.84   | 4.43   | 4.01   | 4.56   | 4.88   | 3.51   | 3.74   | 1.77   | 7.28   | 6.26   | 8.75   | 7.06   | 9.57   | 7.53   | 6.72   | 9.54   | 12.83  | 5.96   | 10.14  | 10.82  | 11.32  | 10.15  |       |
| -67.38 | -74.69 | -60.16 | -58.43 | -71.54 | -10.23 | -10.02 | -9.49  | -11.38 | -7.20  | -8.80  | -9.69  | -6.59  | -4.58  | -26.64 | -18.71 | -26.80 | -25.57 | -27.50 | -24.41 | -21.94 | -24.23 | -28.18 | -21.13 | -29.96 | -29.77 | -33.86 | -27.66 |       |
| -21.67 | -19.90 | -18.49 | -19.97 | -18.85 | -8.88  | -6.94  | -7.08  | -9.22  | -6.81  | -5.78  | -8.57  | -4.85  | -3.99  | -15.36 | -11.31 | -10.20 | -12.45 | -11.32 | -10.72 | -12.24 | -12.00 | -16.08 | -11.53 | -12.14 | -10.78 | -8.87  | -10.20 |       |
| -37.48 | -36.07 | -34.73 | -33.65 | -35.52 | -17.63 | -12.50 | -12.92 | -16.82 | -8.42  | -9.85  | -15.71 | -7.85  | -9.81  | -25.92 | -22.61 | -20.24 | -21.60 | -19.52 | -20.23 | -20.78 | -22.25 | -23.35 | -20.96 | -20.91 | -19.18 | -16.53 | -17.78 |       |
| -8.00  | -11.48 | -5.90  | -6.36  | -2.89  | -0.76  | -3.12  | 0.65   | 2.63   | 0.70   | 0.26   | 0.31   | 0.14   | 0.92   | -1.06  | 3.20   | 1.75   | -0.37  | 2.31   | -0.12  | 0.68   | -2.93  | -2.85  | 2.56   | -1.98  | -0.47  | 0.75   | -0.64  |       |
| -26.08 | -26.02 | -31.77 | -26.65 | -28.19 | -20.50 | -14.75 | -17.30 | -17.43 | -14.53 | -15.10 | -14.33 | -13.53 | -12.76 | -22.23 | -22.16 | -25.78 | -24.14 | -25.30 | -29.50 | -28.00 | -29.57 | -23.12 | -24.51 | -28.87 | -26.70 | -28.45 | -30.35 |       |
| 1.57   | 2.42   | 3.94   | 1.88   | 3.68   | -0.22  | 1.31   | 2.11   | 0.94   | 1.68   | 1.52   | 0.26   | 1.16   | 1.32   | 1.92   | 3.54   | 2.83   | 2.94   | 3.55   | 4.50   | 3.39   | 3.54   | 1.42   | 1.69   | 3.40   | 3.56   | 2.46   | 2.80   |       |
| 3.94   | 4.70   | 4.06   | 5.92   | 6.52   | -1.07  | -0.66  | -1.51  | -2.18  | 1.34   | -1.58  | -1.88  | -0.33  | -0.20  | 4.32   | 7.03   | 6.41   | 4.35   | 5.59   | 6.62   | 7.46   | 7.94   | 3.99   | 6.02   | 7.07   | 4.25   | 5.80   | 4.32   |       |
| 0.57   | -0.77  | 3.44   | -0.37  | 1.34   | -1.57  | 0.39   | 1.12   | -1.28  | -0.43  | -1.17  | -1.52  | -0.57  | -0.44  | -0.57  | -1.65  | -0.19  | 0.56   | 0.40   | 0.40   | 0.40   | -0.97  | -0.52  | -1.97  | -2.21  | -1.54  | -0.30  | -0.77  | -0.98 |
| 0.06   | 0.61   | 0.43   | 1.57   | 1.64   | -1.96  | -0.59  | -0.19  | 0.08   | -0.49  | 0.25   | -0.54  | 0.47   | -0.92  | -0.80  | -0.93  | -2.03  | -0.44  | 0.65   | 0.12   | -0.71  | 0.06   | -0.52  | -1.83  | -0.19  | -1.07  | 0.69   | -0.13  |       |
| 1.52   | 2.79   | 4.05   | 0.86   | 1.03   | 0.71   | 0.45   | -0.02  | 0.52   | 0.39   | 1.27   | -0.74  | -0.43  | 0.15   | 1.38   | 2.30   | 2.85   | 1.61   | 2.00   | 3.06   | 1.61   | 1.63   | -1.92  | 3.97   | 3.10   | 1.42   | 1.90   | 3.24   |       |
| -14.63 | 3.99   | 2.24   | -9.21  | -10.78 | -4.39  | -1.58  | -1.63  | -5.06  | -5.15  | -4.03  | -4.81  | -5.08  | -2.26  | -13.27 | -20.13 | -22.63 | -10.51 | -18.23 | -6.33  | -20.90 | -14.15 | -0.99  | -3.06  | -3.20  | -0.86  | 3.23   | -2.43  |       |
| -14.16 | 3.03   | 6.78   | -7.90  | -6.69  | -3.84  | -6.58  | -2.23  | -3.26  | -8.15  | -7.73  | -6.72  | -9.52  | -4.29  | -22.84 | -33.89 | -32.12 | -21.83 | -27.28 | -16.38 | -30.64 | -22.77 | -5.96  | -7.80  | -3.81  | -0.27  | 5.00   | -0.77  | -0.98 |
| -12.00 | 1.03   | 9.35   | -8.33  | -4.97  | -3.40  | -9.50  | -3.92  | -4.24  | -11.48 | -10.19 | -12.41 | -14.33 | -6.49  | -37.78 | -50.26 | -47.82 | -35.17 | -40.17 | -26.28 | -44.91 | -36.47 | -9.56  | -16.40 | -7.19  | -1.68  | 1.82   | -1.81  |       |
| -5.60  | -9.00  | -4.11  | 5.28   | 0.37   | -2.75  | -2.29  | -0.22  | -4.04  | -1.54  | -2.44  | -3.54  | -3.62  | -3.16  | 7.56   | 5.12   | 5.23   | 7.28   | 7.62   | 8.74   | 7.18   | 5.73   | 7.25   | 8.01   | 7.72   | 6.97   | 10.61  | 8.14   |       |
| -9.22  | -12.28 | -7.36  | 4.28   | -0.66  | 3.85   | -3.65  | -3.04  | -3.91  | -2.88  | -2.73  | -4.14  | -4.98  | -1.56  | 9.72   | 7.72   | 9.38   | 7.18   | 8.33   | 9.45   | 7.74   | 9.09   | 9.29   | 7.39   | 8.87   | 8.81   | 11.44  | 7.39   |       |
| -31.77 | -39.00 | -32.23 | -36.26 | -27.05 | 6.98   | 6.86   | 7.15   | 5.98   | 7.90   | 8.48   | 8.72   | 12.59  | 11.94  | -20.74 | -23.52 | -19.08 | -16.50 | -17.50 | -15.78 | -18.48 | -19.99 | -9.261 | -25.10 | -20.99 | -17.56 | -16.50 | -17.91 |       |
| 6.63   | 0.09   | 4.13   | 3.49   | 2.39   | 1.86   | 1.07   | 2.02   | 0.33   | 2.06   | 2.34   | 0.93   | 1.98   | 0.79   | 4.59   | 8.39   | 4.60   | 5.90   | 3.02   | 4.45   | 4.86   | 6.83   | 1.99   | 6.31   | 3.87   | 4.35   | 3.64   | 3.61   |       |
| 69.73  | 54.21  | 61.76  | 62.44  | 79.98  | 28.79  | 22.74  | 24.97  | 35.48  | 21.45  | 22.94  | 32.63  | 17.19  | 16.54  | 54.27  | 40.22  | 45.96  | 46.16  | 53.95  | 49.10  | 47.40  | 49.32  | 46.80  | 41.79  | 49.81  | 49.14  | 48.83  | 50.91  |       |
| 2.10   | -4.45  | -0.58  | 1.91   | -0.80  | 3.34   | 1.43   | 3.70   | 1.84   | 6.12   | 3.63   | 3.27   | 3.26   | 3.04   | -2.01  | -3.46  | -0.85  | -0.17  | -1.10  | 0.29   | 0.74   | -2.01  | 0.08   | 0.37   | 0.87   | 1.70   | 1.36   | -0.04  |       |
| -8.94  | -13.19 | -6.23  | -9.48  | -7.81  | -0.95  | -0.01  | -0.32  | -1.45  | -1.57  | -0.41  | -1.14  | 0.37   | 0.83   | -4.32  | -2.07  | -2.32  | -3.54  | -4.59  | -3.58  | -2.86  | -3.76  | -3.15  | -2.47  | -3.26  | -4.00  | -4.03  | -2.06  |       |
| -9.94  | -12.11 | -8.61  | -10.71 | -8.70  | -2.03  | -1.61  | -0.37  | -1.78  | 0.54   | 0.18   | -1.40  | 0.39   | 0.39   | -4.42  | -3.87  | -3.77  | -4.65  | -6.10  | -5.19  | -3.88  | -5.21  | -5.65  | -3.58  | -4.74  | -5.06  | -4.74  | -4.75  |       |
| -2.62  | -6.92  | -3.86  | -4.28  | -2.64  | -2.06  | 0.59   | -0.52  | -1.32  | 0.58   | 0.03   | -1.84  | 0.55   | 0.09   | -1.44  | 0.01   | -0.98  | -2.21  | -2.76  | -0.53  | -1.31  | -2.93  | -0.42  | 1.07   | -1.50  | -1.39  | 3.78   | -1.11  |       |
| 4.61   | 11.68  | 8.41   | 6.77   | 5.35   | -2.77  | -1.17  | -1.08  | -2.08  | -0.44  | -1.99  | -3.18  | -0.14  | -0.81  | 5.11   | 4.82   | 5.50   | 7.25   | 7.19   | 6.91   | 7.71   | 8.93   | 4.92   | 5.40   | 6.94   | 6.03   | 6.59   | 5.16   |       |
| 18.14  | 29.17  | 22.33  | 14.65  | 12.69  | -4.35  | -1.30  | -0.42  | -1.45  | -0.90  | -0.50  | -1.99  | -1.36  | -2.05  | 11.53  | 5.83   | 12.13  | 17.04  | 16.93  | 12.19  | 16.52  | 15.52  | 7.02   | 4.98   | 12.73  | 13.17  | 14.23  | 12.22  |       |
| -15.22 | -22.66 | -16.30 | -6.68  | -12.72 | -1.59  | -0.54  | -1.01  | -1.57  | -0.50  | -0.52  | -1.47  | -0.69  | 0.21   | -0.58  | 0.02   | -0.92  | -1.47  | 1.04   | -0.05  | -1.82  | 0.55   | -2.28  | -1.22  | -2.37  | 0.16   | 1.47   | -1.34  |       |
| 0.06   | 1.02   | 2.65   | 2.95   | 0.32   | -1.63  | -1.26  | 0.23   | -0.81  | 0.32   | 0.58   | -0.59  | -0.29  | 0.28   | 1.00   | -0.39  | -0.02  | 0.59   | 0.71   | 1.90   | 0.87   | 0.61   | -1.07  | -0.04  | 1.56   | 0.86   | 2.25   | 1.50   |       |
| -0.95  | 0.55   | 0.82   | 3.16   | 1.74   | -1.52  | -0.86  | -0.67  | -0.83  | -0.49  | -0.72  | -1.28  | -0.11  | -0.13  | -1.98  | -1.83  | -2.33  | -1.21  | 0.47   | -0.66  | -2.66  | -0.95  | -1.41  | -1.68  | -0.51  | -0.30  | 1.97   | 0.46   |       |
| -3.10  | -1.48  | -1.35  | 1.20   | -1.77  | -3.94  | -3.98  | -1.55  | -3.03  | -2.32  | -1.78  | -2.74  | -3.19  | 0.40   | 5.32   | -6.71  | -6.98  | -3.91  | -6.01  | -5.13  | -9.31  | -5.87  | -4.69  | -1.37  | -3.52  | -3.05  | -1.09  | -3.54  |       |
| -3.70  | -5.77  | 9.50   | 14.19  | 16.89  | -5.64  | -6.14  | -4.69  | -3.28  | -4.38  | -5.01  | -5.50  | -6.73  | -8.18  | 16.38  | 15.64  | 13.29  | 12.64  | 13.66  | 13.91  | 13.01  | 15.20  | 24.79  | 21.44  | 15.51  | 13.68  | 12.59  | 13.95  |       |
| -8.68  | -8.90  | 7.51   | 16.46  | 14.53  | -5.90  | -6.47  | -7.02  | -5.44  | -6.68  | -7.66  | -6.17  | -7.80  | -9.42  | 14.55  | 15.54  | 15.14  | 11.37  | 12.91  | 14.77  | 13.66  | 13.74  | 21.21  | 17.31  | 13.63  | 12.93  | 15.09  | 14.42  |       |
| -20.59 | -22.72 | -19.88 | -16.77 | -12.34 | 3.65   | 2.25   | 4.68   | 4.76   | 6.57   | 5.00   | 3.97   | 7.75   | 6.42   | -10.58 | -11.26 | -8.96  | -7.60  | -6.20  | -7.70  | -7.72  | -6.88  | -11.72 | -11.99 | -9.74  | -6.05  | -9.94  | -7.06  |       |
| -2.93  | -5.28  | -0.53  | -1.60  | -3.01  | -1.12  | -0.67  | 0.32   | -2.28  | 0.09   | -1.15  | -1.24  | 0.82   | 0.16   | 2.20   | 0.53   | 0.25   | 0.97   | 2.67   | 2.23   | 2.24   | 1.77   | -1.48  | -0.22  | 2.50   | 1.10   | 3.56   | 0.68   |       |
| -6.70  | -6.83  | -3.95  | -5.28  | -3.28  | -0.72  | -1.23  | -0.31  | 0.30   | 0.74   | 0.28   | 0.19   | 1.17   | 0.12   | -3.02  | -2.32  | -2.08  | -1.05  | -0.79  | -0.65  | -1.07  | -0.58  | -6.13  | -3.32  | -1.33  | -1.71  |        |        |       |

|        |        |        |        |        |        |        |        |        |        |        |        |        |        |        |        |        |        |        |        |        |        |        |        |         |        |        |        |
|--------|--------|--------|--------|--------|--------|--------|--------|--------|--------|--------|--------|--------|--------|--------|--------|--------|--------|--------|--------|--------|--------|--------|--------|---------|--------|--------|--------|
| -0.03  | 2.19   | 2.14   | -0.11  | 0.23   | 1.20   | 1.03   | 2.27   | 0.38   | 3.70   | 1.69   | 1.31   | 4.46   | 1.76   | 1.65   | 2.46   | 2.44   | 2.85   | 3.52   | 3.01   | 1.89   | 2.25   | 0.96   | 4.63   | 2.23    | 2.29   | 1.20   | 4.05   |
| -1.52  | 1.09   | 2.11   | 1.18   | 1.30   | 0.17   | 2.28   | 2.30   | 1.70   | 1.08   | 2.61   | 0.99   | 1.07   | 1.86   | 1.70   | 1.80   | 1.73   | 1.92   | 2.01   | 2.50   | 2.82   | 2.98   | 2.74   | 2.80   | 3.09    | 2.53   | 3.23   | 2.52   |
| 1.79   | 3.52   | 1.76   | 2.68   | 1.41   | -0.08  | 1.73   | 0.65   | 0.08   | 2.82   | 1.24   | -0.10  | 1.08   | 1.00   | 1.58   | 2.20   | 1.89   | 2.71   | 1.41   | 1.29   | 1.72   | 2.09   | 1.26   | 2.19   | 3.24    | 3.53   | 2.58   | 3.18   |
| -5.18  | -5.91  | -3.39  | -2.40  | -0.05  | -1.49  | 0.11   | 0.18   | -0.72  | 0.77   | 0.61   | -0.58  | -0.51  | -0.69  | -0.61  | 0.71   | 0.52   | -0.17  | 2.06   | 0.94   | 0.09   | 2.04   | -0.22  | -1.40  | -0.13   | 0.10   | 3.66   | 0.83   |
| -5.80  | -1.69  | -4.39  | -6.01  | -1.31  | -0.79  | 0.64   | 0.41   | -0.56  | 1.03   | 0.07   | 0.46   | 0.14   | -0.08  | -0.92  | -2.23  | -0.74  | -1.15  | -0.88  | -0.60  | -0.54  | -1.11  | -2.52  | -2.67  | -0.71   | -0.86  | 0.19   | -0.14  |
| 7.81   | 19.12  | 3.65   | 3.96   | 3.25   | -0.46  | 0.84   | -0.03  | -0.75  | -0.09  | 1.81   | -0.69  | 0.03   | 0.17   | 0.59   | 2.17   | 1.54   | 2.83   | 2.23   | 2.04   | 2.53   | 2.01   | 2.68   | 2.59   | 3.04    | 1.65   | 3.08   | 3.37   |
| -5.21  | -3.54  | -4.59  | -7.26  | -9.39  | 3.72   | 3.02   | 3.50   | 5.19   | 5.82   | 4.18   | 3.15   | 5.90   | 4.99   | -3.13  | -1.97  | -1.42  | 0.09   | -0.49  | -1.81  | -0.77  | -1.02  | -3.54  | -3.77  | -2.57   | -1.39  | -1.31  | -2.39  |
| 7.33   | 7.84   | 4.41   | 4.22   | 5.45   | -1.40  | -0.19  | 0.09   | -0.43  | -0.16  | -1.27  | -0.94  | -0.75  | -1.47  | 2.63   | 1.71   | 3.13   | 2.07   | 1.17   | 3.41   | 2.94   | 3.26   | 2.01   | 2.46   | 3.14    | 2.96   | 1.95   | 2.43   |
| 0.17   | 0.79   | 0.10   | 1.43   | 2.74   | -1.77  | -1.41  | -0.01  | -0.14  | -0.15  | 0.03   | -0.49  | -2.12  | -0.49  | 0.79   | 0.70   | 0.14   | 0.91   | 0.34   | -0.58  | -0.63  | 1.14   | 0.03   | 1.90   | 1.01    | 0.29   | 1.26   | -0.64  |
| 26.73  | 23.57  | 32.44  | 29.13  | 34.76  | 9.90   | 2.99   | 1.86   | 1.88   | 0.99   | 2.31   | 2.83   | 2.89   | 1.02   | 6.03   | 3.71   | 7.68   | 6.85   | 11.33  | 8.28   | 5.81   | 7.76   | 9.53   | 6.00   | 8.43    | 11.15  | 11.19  | 9.71   |
| 19.92  | 9.71   | 30.66  | 34.75  | 30.18  | 3.30   | 3.12   | 3.60   | 3.52   | 4.72   | 4.20   | 2.30   | 3.37   | 2.86   | 1.42   | 6.87   | 5.56   | 8.29   | 7.17   | 7.24   | 5.70   | 9.39   | 10.64  | 5.36   | 8.39    | 9.78   | 11.74  | 9.61   |
| -68.77 | -78.61 | -63.33 | -61.94 | -72.56 | -8.13  | -8.14  | -6.56  | -9.67  | -5.82  | -7.17  | -8.86  | -5.93  | -2.71  | -25.57 | -18.08 | -26.09 | -25.10 | -27.11 | -22.77 | -20.46 | -23.87 | -24.91 | -19.33 | -28.03  | -27.38 | -29.03 | -26.10 |
| -22.57 | -20.19 | -18.74 | -19.66 | -18.82 | -8.40  | -5.53  | -5.86  | -8.03  | -6.10  | -5.32  | -7.59  | -3.74  | -3.49  | -13.71 | -10.68 | -9.85  | -12.09 | -10.95 | -10.28 | -12.36 | -12.61 | -14.83 | -10.52 | -10.33  | -10.88 | -7.41  | -10.56 |
| -37.83 | -37.45 | -35.81 | -33.31 | -34.68 | -15.94 | -10.05 | -11.28 | -15.43 | -6.64  | -8.47  | -14.84 | -6.57  | -7.98  | -26.77 | -22.28 | -19.96 | -21.88 | -19.59 | -21.01 | -20.57 | -22.04 | -21.80 | -20.28 | -20.89  | -18.73 | -15.81 | -17.97 |
| -8.15  | -10.42 | -6.31  | -7.31  | -2.97  | -0.27  | -3.47  | 0.50   | 2.94   | 1.05   | 1.41   | 1.76   | -0.51  | -0.25  | -0.63  | 2.30   | 1.43   | -0.57  | 1.74   | -1.27  | 5.00   | -2.63  | -3.18  | 3.17   | -1.13   | -1.02  | 0.67   | -1.10  |
| -28.63 | -27.08 | -32.52 | -28.87 | -30.36 | -21.36 | -16.50 | -18.49 | -19.50 | -15.96 | -15.39 | -15.27 | -14.70 | -13.99 | -23.45 | -23.68 | -26.95 | -26.79 | -26.34 | -30.74 | -28.56 | -31.94 | -24.56 | -26.93 | -31.09  | -28.37 | -28.91 | -32.03 |
| 1.66   | 2.68   | 4.23   | 2.61   | 4.01   | -0.01  | 1.77   | 1.99   | 0.67   | 1.60   | 0.81   | -0.02  | 0.76   | 0.84   | 1.98   | 2.62   | 3.43   | 3.41   | 3.59   | 3.87   | 3.69   | 3.42   | 1.77   | 2.56   | 3.22    | 3.60   | 3.00   | 2.54   |
| 5.51   | 4.43   | 5.58   | 6.48   | 8.91   | -0.49  | -0.73  | -0.51  | -2.44  | 0.33   | -0.64  | -1.71  | 0.47   | -0.26  | 5.21   | 6.04   | 5.88   | 5.25   | 7.84   | 6.95   | 8.59   | 7.65   | 4.97   | 7.03   | 7.77    | 4.41   | 6.43   | 6.34   |
| 0.27   | 0.66   | 2.74   | 0.14   | 1.06   | -1.43  | 0.12   | 0.68   | -1.67  | -0.61  | -0.17  | -1.24  | -1.10  | -0.20  | -1.39  | -2.01  | -0.14  | 0.63   | -0.57  | 1.99   | -0.46  | -0.67  | -2.77  | -2.28  | -1.67   | -0.72  | -0.41  | -1.22  |
| -0.44  | 1.39   | 0.62   | 1.74   | 2.50   | -2.15  | -0.51  | -0.09  | 0.36   | -0.24  | 0.04   | -0.91  | 0.21   | -1.86  | -0.97  | -1.34  | -1.12  | -0.45  | 0.74   | -0.77  | -0.67  | -0.09  | -0.24  | -2.39  | 0.02    | -0.96  | 0.73   | 0.04   |
| 1.81   | 3.56   | 3.63   | 2.73   | 1.41   | -0.48  | -1.67  | 0.67   | 0.30   | -0.55  | 1.06   | 0.29   | -0.40  | 0.64   | 1.86   | 2.33   | 2.62   | 3.26   | 2.86   | 3.55   | 2.32   | 1.04   | -0.82  | 3.77   | 2.30    | 1.92   | 1.00   | 3.70   |
| -17.54 | 5.74   | 0.31   | -8.22  | -10.68 | -5.76  | -1.47  | -0.99  | -7.10  | -4.31  | -3.55  | -4.58  | -5.95  | -2.19  | -16.81 | -8.22  | -26.94 | -14.73 | -25.12 | -10.19 | -23.43 | -18.57 | -5.79  | -6.82  | -4.10   | -0.88  | 0.01   | -1.58  |
| -16.52 | 4.06   | 5.39   | -7.46  | -6.53  | -4.94  | -5.51  | -1.98  | -7.24  | -7.10  | -7.17  | -7.46  | -8.95  | -3.87  | -27.40 | -41.85 | -38.02 | -28.61 | -36.00 | -21.75 | -35.66 | -28.59 | -13.18 | -15.82 | -10.32  | -6.07  | -1.06  | -1.57  |
| -15.04 | 1.49   | 5.86   | -8.82  | -5.23  | -4.77  | -8.10  | -2.60  | -10.96 | -10.80 | -9.52  | -11.43 | -14.74 | -6.04  | -43.64 | -59.26 | -53.66 | -44.10 | -48.92 | -33.99 | -51.02 | -45.17 | -24.64 | -28.35 | -17.89  | -6.23  | -0.31  | -5.41  |
| -6.17  | -8.84  | -4.36  | 5.65   | 3.08   | -3.40  | -2.01  | -2.74  | -4.17  | -2.09  | -3.46  | -4.28  | -4.02  | -4.52  | 6.77   | 5.08   | 5.17   | 7.59   | 6.88   | 7.29   | 7.59   | 5.60   | 5.12   | 5.66   | 7.04    | 6.37   | 9.94   | 7.04   |
| -9.57  | -12.36 | -7.41  | 3.98   | 0.54   | -3.85  | -4.38  | -3.46  | -4.34  | -3.06  | -2.80  | -4.80  | -3.57  | -5.77  | 8.21   | 6.85   | 8.41   | 7.19   | 8.70   | 9.26   | 7.52   | 8.23   | 6.26   | 6.31   | 7.42    | 7.39   | 9.91   | 5.87   |
| -32.26 | -39.89 | -32.58 | -36.53 | -28.05 | 9.48   | 8.32   | 8.35   | 8.56   | 9.25   | 10.82  | 10.18  | 12.10  | 13.34  | -18.42 | -22.54 | -17.37 | -14.70 | -15.82 | -13.82 | -16.08 | -17.63 | -20.65 | -20.50 | -19.42  | -12.90 | -12.82 | -14.40 |
| 7.31   | 0.88   | 3.12   | 3.12   | 3.42   | 1.70   | 0.57   | 1.48   | 0.19   | 1.73   | 1.55   | 2.61   | 1.68   | 1.21   | 3.65   | 8.15   | 4.93   | 5.42   | 3.61   | 5.39   | 5.00   | 6.73   | 3.63   | 6.50   | 2.84    | 3.60   | 2.27   | 4.12   |
| 69.04  | 55.60  | 62.82  | 62.32  | 80.37  | 25.63  | 19.08  | 21.64  | 32.07  | 18.00  | 18.73  | 29.02  | 14.51  | 12.23  | 51.88  | 37.41  | 44.21  | 45.88  | 52.96  | 47.81  | 46.51  | 47.58  | 42.69  | 39.29  | 47.07   | 46.36  | 47.15  | 49.20  |
| 0.92   | -3.50  | -1.80  | 2.87   | -2.28  | 3.96   | 1.66   | 3.22   | 0.71   | 5.90   | 3.46   | 2.74   | 3.82   | 3.43   | -2.49  | -1.93  | -3.10  | 1.75   | 2.08   | 0.57   | 0.79   | -1.93  | -0.02  | 5.00   | 1.95    | -0.01  | 0.35   | 2.03   |
| -10.25 | -15.09 | -7.24  | -10.45 | -8.34  | -1.20  | 0.41   | 0.68   | -0.95  | 1.94   | 0.77   | -0.53  | 1.29   | 0.06   | -3.46  | -2.27  | -1.89  | -2.74  | -4.63  | -3.09  | -2.17  | -2.52  | -2.68  | -2.20  | -2.63   | -3.75  | -3.33  | -2.58  |
| -11.73 | -14.00 | -9.78  | -11.19 | -8.99  | -0.78  | -0.35  | 0.60   | -0.77  | 0.26   | 0.75   | -1.22  | 0.75   | 0.65   | -4.67  | -3.63  | -3.64  | -4.67  | -6.16  | -4.88  | -3.00  | -5.75  | -4.71  | -3.77  | -5.11   | -4.34  | -5.04  | -3.76  |
| -4.39  | -7.37  | -4.88  | -5.18  | -1.82  | -1.30  | 0.74   | 0.08   | -2.02  | 0.88   | 0.74   | -2.22  | 0.76   | 0.66   | -2.11  | 0.70   | -0.53  | -2.61  | -2.12  | -2.10  | -1.55  | -2.37  | -0.13  | 0.40   | -0.53   | -1.61  | 3.00   | -1.39  |
| 4.50   | 13.08  | 8.30   | 7.80   | 5.28   | -4.11  | -0.79  | -1.10  | -1.97  | -1.61  | -2.29  | -3.01  | -1.21  | -1.73  | 5.63   | 4.57   | 6.79   | 6.28   | 7.57   | 6.22   | 7.30   | 8.58   | 2.68   | 3.18   | 5.95    | 5.78   | 5.88   | 4.98   |
| 17.67  | 29.85  | 21.83  | 14.81  | 14.00  | -4.91  | -2.12  | -1.66  | -2.08  | -1.52  | -2.08  | -3.60  | -2.35  | -2.90  | 10.63  | 6.25   | 11.95  | 17.54  | 17.24  | 12.66  | 16.37  | 15.56  | 7.33   | 5.47   | 12.61   | 12.28  | 14.18  | 11.55  |
| -14.02 | -22.77 | -15.23 | -6.99  | -12.35 | 0.06   | -0.70  | -1.38  | -2.41  | -0.49  | -0.49  | -0.88  | -0.29  | 0.72   | 0.18   | 0.54   | -1.94  | -0.83  | 0.73   | -0.85  | -0.23  | 0.40   | -1.19  | 0.04   | -2.96   | 1.22   | 1.79   | 0.43   |
| 0.38   | 1.84   | 1.50   | 3.50   | 0.89   | -1.19  | -1.02  | -0.27  | -1.14  | 0.21   | 0.28   | -0.44  | -0.47  | -0.33  | 0.43   | 0.01   | -0.72  | 0.72   | -0.22  | 1.82   | 0.64   | 0.45   | -0.56  | -0.63  | 0.11    | 0.42   | 2.31   | 1.10   |
| -0.94  | 1.44   | 1.63   | 3.21   | 2.74   | -1.45  | -0.90  | -0.40  | -0.30  | -0.84  | -0.21  | -1.08  | -0.27  | -0.73  | -2.28  | -2.73  | -3.34  | -2.10  | -1.17  | -0.73  | -2.72  | -1.89  | -1.70  | -1.25  | -0.67   | -0.42  | 1.22   | -0.18  |
| -0.39  | -0.38  | -2.03  | 1.39   | -2.14  | -3.60  | -4.25  | -1.67  | -2.76  | -1.85  | -1.65  | -2.37  | -2.27  | 1.54   | -6.23  | -9.07  | -8.30  | -5.39  | -5.74  | -6.79  | -11.26 | -6.23  | -7.40  | -3.03  | -4.81   | -4.57  | -1.16  | -5.56  |
| -3.16  | -5.14  | 9.32   | 14.93  | 17.90  | -6.19  | -6.38  | -5.90  | -4.57  | -4.79  | -6.25  | -5.16  | -7.62  | -9.80  | 13.12  | 13.25  | 11.79  | 9.53   | 11.48  | 11.90  | 9.97   | 13.61  | 15.30  | 16.06  | 12.08   | 9.38   | 11.03  | 12.31  |
| -7.93  | -8.74  | 8.09   | 18.03  | 16.12  | -6.63  | -8.28  | -7.77  | -6.54  | -7.53  | -8.23  | -7.45  | -8.72  | -10.45 | 12.29  | 14.47  | 13.13  | 10.87  | 12.90  | 12.56  | 13.01  | 12.92  | 15.41  | 14.90  | 11.19   | 13.39  | 10.87  | 12.71  |
| -21.25 | -26.61 | -20.66 | -16.57 | -12.89 | 5.76   | 3.58   | 4.53   | 4.70   | 7.03   | 5.50   | 5.85   | 7.46   | 6.80   | -9.26  | -7.91  | -7.44  | -6.88  | -3.86  | -7.52  | -6.46  | -6.75  | -8.98  | -9.74  | -7.24   | -5.99  | -7.11  | -4.62  |
| -4.13  | -4.78  | -1.50  | -1.49  | -1.25  | -1.27  | -1.02  | 0.25   | -1.70  | -0.01  | -0.77  | -0.72  | 0.56   | 0.18   | 1.57   | 3.04   | -0.68  | 0.77   | 1.97   | 2.05   | 2.96   | 1.26   | -1.21  | -0.35  | 0.66    | -0.26  | 2.92   | 0.53   |
| -7.62  | -6.34  | -4.14  | -5.86  | -2.14  | -1.18  | -0.99  | 0.66   | 0.17   | 0.94   | 0.91   | 0.59   | 0.50   | 0.09   | -3.03  | -2.54  | -1.79  | -0.75  | -0.48  | -0.57  | -0.45  | -0.07  | -3.19  | -2.31  | -0.68   | -0.45  | -0.31  | -1.21  |
| 1.39   | 4.26   | 4.23   | 4.20   | 1.06   | -1.68  | -1.90  | 0.50   | 1.02   | -0.03  | -1.08  | 0.84   | -2.02  | -1.35  | 3.99   | 0.80   | 0.61   | 3.79   | 0.77   | 2.48   | 1.14   | 1.77   | 2.08   | 2.50   | 2.94    | 0.94   | 3.60   | 1.18   |
| 26.93  | 27.36  | 30.82  | 27.26  | 33.26  | 6.54   | 2.01   | 6.42   | 7.21   | 3.30   | 3.62   | 5.81   | 2.52   | 1.48   | 15.67  | 15.08  | 18.48  | 13.90  | 18.24  | 18.20  | 16.24  | 16.93  | 14.52  | 15.19  | 17.24   | 18.02  | 20.47  | 19.51  |
| 90.80  | 92.52  | 97.08  | 90.11  | 116.63 | 16.80  | 13.05  | 13.70  | 20.60  | 11.76  | 12.99  | 17.78  | 8.89   | 7.69   | 41.99  | 29.08  | 40.42  | 40.40  | 43.57  | 39.62  | 39.43  | 42.17  | 43.04  | 29.37  | 46.20</ |        |        |        |

|        |        |        |        |        |        |        |        |        |        |        |        |        |        |        |        |        |        |        |        |        |        |        |        |        |        |        |        |        |
|--------|--------|--------|--------|--------|--------|--------|--------|--------|--------|--------|--------|--------|--------|--------|--------|--------|--------|--------|--------|--------|--------|--------|--------|--------|--------|--------|--------|--------|
| 0.68   | -5.27  | -3.77  | -1.72  | -0.46  | -1.62  | -0.57  | 0.23   | -0.34  | 0.40   | 0.67   | -1.01  | -0.86  | -0.27  | 0.19   | 0.51   | -0.30  | 1.46   | 2.01   | 1.35   | -0.68  | 2.23   | -0.86  | -1.75  | 0.01   | 0.94   | -0.07  | 2.20   |        |
| 1.51   | -0.55  | -4.56  | -5.46  | -1.26  | -0.65  | 1.23   | 0.35   | -0.17  | 0.74   | 0.74   | 0.21   | 0.66   | -0.57  | -0.77  | -2.08  | -0.42  | -1.35  | -0.50  | -0.47  | -0.89  | -0.84  | -2.31  | -2.50  | -1.03  | -0.64  | 0.14   | -0.40  |        |
| 7.61   | 21.94  | 3.95   | 4.23   | 2.66   | -0.93  | 1.94   | -0.57  | -1.29  | -0.06  | 0.45   | -0.22  | 0.37   | 0.72   | 0.64   | 2.31   | 1.04   | 2.44   | 1.09   | 3.33   | 2.99   | 2.10   | 3.34   | 2.66   | 3.70   | 1.86   | 2.93   | 4.11   |        |
| -3.72  | -3.76  | -6.31  | -7.12  | -9.94  | 4.78   | 4.17   | 3.74   | 5.52   | 5.92   | 5.76   | 4.75   | 6.33   | 4.21   | -2.58  | -1.67  | -1.64  | -0.41  | -0.67  | -1.88  | -1.36  | -1.19  | -3.18  | -4.35  | -1.56  | -1.47  | -0.31  | -1.46  |        |
| 7.03   | 7.10   | 5.16   | 3.56   | 6.50   | -1.98  | -0.40  | -0.22  | -0.57  | -0.10  | -1.00  | -0.56  | -1.77  | -1.68  | 2.49   | 2.09   | 3.14   | 2.55   | 1.75   | 3.14   | 2.57   | 3.68   | 1.16   | 2.68   | 2.76   | 3.22   | 2.57   | 3.11   |        |
| 1.50   | 0.35   | -0.67  | 1.18   | 2.55   | -1.06  | -0.72  | -0.39  | -0.88  | -0.50  | -0.23  | -0.24  | -0.74  | -0.76  | 0.39   | 1.31   | 0.95   | 0.32   | -0.38  | -0.78  | 0.80   | 1.00   | 0.66   | 0.17   | 0.96   | -0.27  | 1.79   | 1.41   |        |
| 27.94  | 25.96  | 33.92  | 27.99  | 36.65  | 0.48   | 2.17   | 1.65   | 2.02   | 1.62   | 2.39   | 1.01   | 1.55   | 0.72   | 5.78   | 3.35   | 8.56   | 6.69   | 11.55  | 8.57   | 6.16   | 7.54   | 8.86   | 5.08   | 7.46   | 10.81  | 9.65   | 11.08  |        |
| 20.68  | 10.99  | 30.15  | 34.46  | 30.54  | 2.53   | 1.63   | 3.39   | 4.19   | 3.97   | 3.78   | 3.89   | 2.39   | 0.88   | 7.00   | 5.84   | 7.95   | 7.05   | 9.61   | 7.34   | 5.99   | 9.35   | 9.37   | 5.50   | 9.28   | 9.43   | 10.00  | 9.44   |        |
| -69.92 | -78.46 | -64.99 | -63.18 | -73.55 | -8.39  | -6.37  | -7.09  | -6.70  | -4.82  | -5.89  | -7.50  | -5.12  | -2.85  | -25.77 | -19.44 | -25.55 | -25.86 | -27.99 | -22.33 | -20.45 | -23.89 | -22.69 | -17.58 | -27.63 | -27.10 | -30.92 | -24.73 |        |
| -22.56 | -20.75 | -19.11 | -17.67 | -18.03 | -8.30  | -5.11  | -5.52  | -7.01  | -5.82  | -4.38  | -6.86  | -2.41  | -2.95  | -14.71 | -10.57 | -10.35 | -12.61 | -10.81 | -10.77 | -12.54 | -11.58 | -14.50 | -10.89 | -11.28 | -10.02 | -7.50  | -10.01 |        |
| -37.99 | -37.34 | -35.19 | -31.38 | -35.55 | -14.50 | -5.86  | -8.90  | -14.05 | -6.34  | -6.81  | -14.00 | -5.95  | -6.49  | -48.16 | -22.65 | -19.32 | -22.28 | -19.57 | -20.41 | -20.16 | -22.72 | -20.68 | -19.16 | -19.79 | -18.65 | -15.36 | -17.32 |        |
| -8.48  | -9.23  | -6.44  | -5.97  | -3.12  | 0.41   | -1.84  | 0.75   | 3.97   | 1.16   | 0.52   | 1.90   | -0.03  | 0.43   | -0.85  | 2.25   | 1.94   | -0.72  | 1.78   | -1.67  | -0.59  | -2.07  | -2.66  | 1.86   | -1.93  | -1.21  | -0.24  | -0.59  |        |
| -30.64 | -29.81 | -34.34 | -30.47 | -31.52 | -22.57 | -17.57 | -20.66 | -19.88 | -16.25 | -17.18 | -16.76 | -15.10 | -15.72 | -25.93 | -23.58 | -27.88 | -28.50 | -27.04 | -33.18 | -30.30 | -33.24 | -26.06 | -27.13 | -32.51 | -29.54 | -31.19 | -32.70 |        |
| 2.51   | 2.80   | 4.01   | 2.69   | 4.14   | 0.07   | 1.96   | 1.96   | 1.16   | 1.69   | 1.61   | -0.17  | 0.56   | 1.45   | 2.51   | 3.51   | 2.54   | 3.85   | 3.46   | 4.69   | 3.97   | 3.79   | 1.79   | 2.72   | 3.66   | 4.12   | 3.68   | 3.06   |        |
| 6.15   | 5.12   | 6.12   | 7.39   | 8.88   | -0.01  | 0.44   | -0.50  | -2.21  | 0.53   | 0.24   | -1.05  | 0.70   | -1.10  | 4.82   | 6.77   | 7.52   | 4.85   | 7.40   | 7.67   | 8.30   | 7.52   | 5.46   | 5.83   | 7.16   | 3.49   | 6.22   | 5.88   |        |
| -0.14  | 0.88   | 2.83   | -0.50  | 1.37   | -1.26  | -0.90  | 0.84   | -1.44  | -0.85  | 0.06   | -1.06  | -0.75  | 0.14   | -0.48  | -2.62  | -0.05  | 0.06   | -0.18  | 1.43   | -0.43  | -1.09  | -1.59  | -2.28  | -1.23  | -0.48  | 0.33   | 0.56   |        |
| 0.37   | 1.14   | 0.40   | 1.90   | 2.54   | -2.32  | -0.49  | -1.12  | -0.08  | -0.03  | -0.16  | -1.19  | 0.34   | -1.95  | -1.12  | -3.21  | -2.29  | -0.79  | 0.52   | -0.37  | -1.14  | 0.23   | -1.10  | -2.27  | -0.59  | -0.94  | 0.53   | -0.41  |        |
| 1.31   | 5.28   | 4.48   | 2.57   | 1.89   | -0.36  | 0.28   | -0.26  | -0.38  | -0.47  | 0.45   | -0.44  | -0.21  | 1.31   | 0.85   | 1.84   | 2.77   | 2.63   | 3.45   | 3.05   | 3.14   | 0.99   | -0.50  | 3.54   | 2.26   | 1.74   | 1.94   | 3.93   |        |
| -13.51 | 6.44   | -0.13  | -9.19  | -9.63  | -4.85  | -0.99  | -1.13  | -6.53  | -4.15  | -2.94  | -4.79  | -5.14  | -1.84  | -26.85 | -4.62  | -37.50 | -26.39 | -40.30 | -20.10 | -33.35 | -29.48 | -26.55 | -15.57 | -19.40 | -4.96  | -2.45  | -10.81 |        |
| -13.29 | 5.04   | 4.91   | -8.87  | -5.88  | -3.69  | -5.31  | -1.63  | -6.65  | -6.08  | -6.68  | -6.86  | -8.06  | -3.72  | -41.97 | -57.57 | -51.71 | -41.99 | -53.23 | -35.97 | -48.62 | -43.41 | -41.68 | -29.46 | -32.81 | -16.86 | -12.01 | -18.04 |        |
| -13.38 | 1.72   | 5.74   | -9.76  | -5.72  | -4.20  | -7.61  | -2.52  | -10.49 | -9.21  | -8.72  | -11.53 | -13.86 | -4.24  | -62.43 | -77.75 | -70.18 | -62.65 | -68.24 | -51.50 | -67.97 | -64.93 | -64.52 | -47.73 | -51.69 | -30.45 | -19.79 | -35.00 |        |
| -6.34  | -9.61  | -4.65  | 5.90   | -2.85  | -2.64  | -2.50  | -3.28  | -3.91  | -2.96  | -3.92  | -3.94  | -4.01  | -4.87  | 6.74   | 3.72   | 4.72   | 5.72   | 6.78   | 7.58   | 6.52   | 5.47   | 4.50   | 6.27   | 6.46   | 6.12   | 7.73   | 7.24   |        |
| -9.88  | -13.17 | -7.68  | 4.23   | 0.53   | -2.96  | -4.70  | -3.83  | -3.40  | -2.32  | -3.34  | -4.64  | -5.02  | -5.87  | 6.07   | 6.29   | 9.22   | 7.62   | 9.04   | 9.26   | 7.37   | 8.33   | 5.25   | 5.54   | 7.26   | 6.88   | 7.81   | 6.60   |        |
| -32.36 | -30.63 | -34.58 | -36.28 | -27.83 | 8.72   | 9.48   | 8.85   | 8.80   | 10.20  | 10.46  | 9.82   | 12.20  | 14.35  | -17.78 | -21.81 | -17.02 | -13.95 | -14.20 | -19.91 | -13.52 | -16.01 | -18.26 | -19.91 | -20.24 | -17.31 | -14.18 | -11.73 | -13.60 |
| 5.91   | -0.09  | 3.41   | 3.53   | 2.80   | 1.14   | 0.83   | 1.57   | -0.64  | 1.90   | 1.86   | 0.71   | 1.28   | 0.28   | 3.27   | 6.94   | 5.96   | 5.79   | 3.10   | 4.33   | 5.05   | 6.52   | 2.58   | 5.48   | 3.58   | 4.23   | 3.29   | 5.28   |        |
| 70.35  | 55.94  | 63.36  | 62.33  | 80.86  | 23.73  | 15.43  | 19.60  | 29.94  | 16.38  | 16.15  | 27.58  | 12.34  | 9.84   | 52.40  | 37.50  | 44.83  | 46.45  | 53.88  | 48.59  | 45.99  | 49.49  | 40.15  | 38.05  | 46.50  | 46.32  | 47.17  | 48.93  |        |
| 0.34   | -3.98  | -0.32  | 1.31   | -8.36  | 2.10   | 1.90   | 0.63   | 2.20   | 4.38   | 4.17   | 1.08   | 2.27   | 2.57   | -2.34  | -1.61  | -2.07  | 0.34   | -2.00  | 0.14   | 1.38   | -2.33  | -1.41  | -0.06  | 2.38   | -0.49  | 0.16   | 0.62   |        |
| -11.15 | -16.57 | -0.74  | -10.77 | -8.82  | -0.80  | 0.52   | 0.77   | -0.21  | 1.83   | 1.05   | 0.46   | 2.25   | 0.96   | -4.03  | -2.30  | -1.59  | -2.68  | -4.31  | -3.32  | -2.61  | -2.66  | -2.14  | -1.82  | -2.21  | -3.02  | -3.37  | -1.88  |        |
| -12.88 | -14.81 | -10.44 | -11.61 | -9.38  | -0.25  | -0.19  | 0.82   | -0.30  | 0.73   | 1.28   | -0.38  | 0.91   | 1.04   | -4.44  | -3.55  | -4.06  | -4.62  | -5.62  | -4.30  | -3.42  | -5.46  | -4.10  | -3.25  | -3.98  | -3.81  | -5.02  | -3.26  |        |
| -3.61  | -8.31  | -5.01  | -6.03  | -3.60  | -1.36  | 1.05   | 1.14   | -2.04  | 0.48   | 0.63   | -1.94  | 1.02   | 2.01   | -2.08  | -1.99  | -1.27  | -1.86  | -2.51  | -1.69  | -0.71  | -3.36  | 0.61   | -0.36  | -0.54  | -1.37  | 7.72   | -1.74  |        |
| 4.17   | 12.71  | 9.06   | 6.87   | 5.54   | -4.03  | -1.48  | -2.21  | -1.90  | -2.32  | -0.79  | -3.36  | -1.31  | -1.96  | 4.95   | 5.04   | 6.12   | 6.73   | 6.47   | 6.94   | 6.47   | 8.34   | 2.06   | 3.07   | 5.59   | 4.73   | 7.14   | 5.47   |        |
| 18.24  | 27.66  | 21.74  | 15.12  | 13.81  | -5.76  | -2.92  | -2.73  | -3.48  | -2.52  | -4.07  | -3.98  | -2.57  | -3.92  | 10.56  | 5.96   | 12.21  | 17.56  | 18.19  | 12.83  | 16.81  | 16.13  | 6.96   | 5.57   | 13.04  | 13.84  | 13.37  | 12.16  |        |
| -13.83 | -24.25 | -14.58 | -6.08  | -10.32 | -1.00  | -0.20  | -0.03  | -1.57  | -0.03  | 0.66   | -1.91  | 0.45   | 0.88   | -0.70  | 0.30   | -2.02  | -0.79  | 1.77   | -0.02  | -0.84  | 0.30   | -1.45  | 0.14   | -1.14  | -1.41  | 1.13   | -0.01  |        |
| 0.84   | 1.84   | 2.14   | 3.03   | 0.74   | -1.14  | -1.02  | -0.07  | 0.17   | 0.38   | 0.29   | -1.01  | -0.61  | 0.61   | 0.10   | 0.73   | -1.00  | 0.42   | 0.69   | 1.36   | -0.11  | 1.45   | -1.37  | -0.56  | 1.27   | 0.93   | 2.61   | 1.13   |        |
| -1.17  | 2.01   | 0.66   | 3.02   | 2.68   | -1.28  | -1.14  | -0.19  | -0.74  | -0.53  | -0.08  | -0.78  | 0.30   | -0.90  | -3.21  | -4.27  | -3.66  | -2.25  | -1.23  | -1.66  | -3.85  | -2.90  | -2.92  | -2.48  | -1.53  | -1.16  | 1.01   | -0.36  |        |
| -3.07  | -0.60  | -2.79  | 1.56   | -2.11  | -2.85  | -3.85  | -1.78  | -3.13  | -1.94  | -0.85  | -4.13  | -2.86  | 0.26   | -9.25  | -9.70  | -10.61 | -8.52  | -12.08 | -10.18 | -12.88 | -8.68  | -9.32  | -3.28  | -8.38  | -6.28  | -2.97  | -6.50  |        |
| -2.82  | -6.00  | 10.22  | 16.13  | 18.36  | -5.99  | -7.63  | -6.19  | -3.95  | -5.85  | -6.69  | -6.12  | -8.12  | -10.46 | 12.03  | 12.05  | 11.71  | 10.57  | 11.86  | 9.40   | 13.68  | 13.99  | 14.79  | 12.26  | 9.07   | 10.17  | 11.71  | 11.71  |        |
| -7.92  | -9.12  | 7.72   | 17.77  | 17.01  | -6.70  | -9.13  | -9.05  | -6.44  | -8.27  | -8.97  | -7.60  | -9.34  | -11.12 | 12.01  | 13.36  | 12.87  | 11.24  | 12.66  | 11.70  | 12.56  | 11.94  | 13.38  | 13.06  | 10.49  | 10.83  | 11.23  | 12.04  |        |
| -21.23 | -27.90 | -20.41 | -16.75 | -13.67 | 6.06   | 3.70   | 7.62   | 5.12   | 7.12   | 7.07   | 5.65   | 7.13   | 8.71   | -9.67  | -8.37  | -6.86  | -5.74  | -4.50  | -6.09  | -5.26  | -5.90  | -8.15  | -9.82  | -7.47  | -4.79  | -5.72  | -3.88  |        |
| -3.41  | -3.24  | -1.32  | -1.90  | -2.15  | -1.02  | -0.45  | 0.33   | -2.12  | -0.60  | 0.73   | -2.23  | 0.50   | 0.04   | 1.64   | 0.41   | -0.04  | -0.06  | 2.21   | 1.87   | 2.03   | 1.64   | -1.43  | -0.35  | 1.21   | -0.28  | 3.17   | 1.03   |        |
| -5.93  | -4.34  | -3.95  | -5.57  | -1.11  | -0.93  | -1.13  | 0.16   | 0.66   | 1.28   | 0.52   | 0.70   | 0.37   | 0.01   | -2.32  | -2.30  | -1.97  | -0.29  | 1.15   | -0.28  | -0.37  | 1.10   | -3.14  | -1.73  | -0.85  | -0.72  | 0.94   | -1.15  |        |
| 2.40   | 5.19   | 2.56   | 4.89   | 1.05   | -1.34  | -1.70  | 1.14   | 0.54   | -0.04  | -0.47  | 0.19   | -0.72  | -1.63  | 2.53   | -0.11  | 0.97   | 2.26   | 1.04   | 3.23   | 3.31   | 1.09   | 1.64   | 2.01   | 2.99   | 0.21   | 4.82   | 1.82   |        |
| 27.46  | 26.95  | 31.79  | 26.94  | 32.71  | 5.23   | 0.78   | 4.71   | 6.02   | 2.03   | 3.68   | 5.32   | 1.52   | 0.96   | 15.76  | 15.19  | 18.34  | 14.63  | 18.85  | 18.14  | 16.28  | 16.81  | 13.13  | 13.64  | 17.30  | 17.90  | 21.19  | 21.91  |        |
| 94.01  | 92.63  | 96.80  | 88.51  | 118.06 | 15.37  | 10.08  | 11.33  | 19.48  | 10.10  | 10.26  | 15.95  | 7.47   | 5.84   | 41.89  | 29.58  | 40.21  | 40.87  | 44.37  | 39.92  | 39.21  | 43.18  | 40.87  | 28.83  | 45.10  | 40.38  | 48.23  | 43.75  |        |
| -33.72 | -39.93 | -29.95 | -34.60 | -57.43 | -10.99 | -4.83  | -6.25  | -12.26 | -2.98  | -4.95  | -11.49 | -4.82  | -22.88 | -19.12 | -18.92 | -17.17 | -18.48 | -15.56 | -15.32 | -19.66 | -16.77 | -13.29 | -20.17 | -16.74 | -17.43 | -16.97 | -8.07  |        |
| -16.09 | -8.98  | -2.83  | -4.43  | -1.38  | -3.01  | -3.39  | -1.52  | -2.10  | -3.46  | -1.66  | -2.41  | -3.58  | -4.77  | -34.57 | -39.45 | -31.68 | -34.88 | -39.41 | -29.37 | -29.88 | -32.17 | -23.75 | -18.24 | -23.74 | -8.83  | -15.02 | -8.07  |        |
| -13.97 | -5.70  | -2.82  | -3.68  | 2.24   | -3.34  | -6.43  | -1.23  | -3.78  | -4.39  | -2.55  | -2.96  | -5.97  | -5.75  | -51.56 | -54.41 | -45.37 | -50.6  |        |        |        |        |        |        |        |        |        |        |        |

|        |        |        |        |        |        |        |        |        |        |        |        |        |        |        |        |        |        |        |        |        |        |         |        |        |        |        |        |
|--------|--------|--------|--------|--------|--------|--------|--------|--------|--------|--------|--------|--------|--------|--------|--------|--------|--------|--------|--------|--------|--------|---------|--------|--------|--------|--------|--------|
| -5.35  | -3.37  | -4.39  | -6.33  | -9.34  | 4.53   | 4.60   | 4.75   | 6.63   | 5.97   | 5.69   | 5.39   | 6.20   | 5.43   | -2.80  | -1.07  | -0.19  | -0.05  | -0.12  | -1.44  | -0.45  | -0.27  | -2.61   | -4.01  | -1.00  | -1.20  | -0.15  | -0.93  |
| 6.22   | 8.06   | 5.00   | 3.47   | 6.72   | -2.38  | -0.60  | 0.19   | -1.09  | -0.37  | -0.99  | -1.04  | -1.40  | -1.78  | 2.98   | 1.11   | 2.85   | 2.15   | 1.18   | 3.14   | 2.49   | 3.02   | 1.70    | 1.90   | 2.29   | 3.25   | 2.84   | 2.74   |
| 0.01   | 0.30   | 0.78   | 1.61   | 2.72   | -0.97  | -1.72  | 0.13   | -1.63  | -0.28  | -0.24  | -0.70  | -0.88  | -0.50  | 0.19   | 0.64   | -0.04  | -0.35  | -0.27  | -0.27  | -0.51  | 0.29   | 0.24    | 1.53   | 0.31   | -0.10  | 1.12   | 0.81   |
| 27.54  | 26.88  | 35.39  | 28.74  | 36.78  | 0.77   | 2.56   | 1.47   | 1.50   | 2.18   | 1.92   | 1.52   | 1.50   | 0.29   | 5.40   | 3.67   | 8.19   | 8.19   | 12.31  | 9.88   | 6.64   | 7.61   | 7.54    | 5.23   | 9.30   | 11.45  | 9.99   | 10.22  |
| 20.65  | 10.89  | 33.17  | 33.47  | 32.63  | 2.34   | 2.01   | 2.63   | 3.59   | 3.60   | 3.39   | 2.78   | 2.32   | 1.51   | 8.05   | 5.86   | 7.91   | 8.46   | 10.12  | 7.15   | 6.50   | 10.07  | 10.48   | 5.71   | 8.38   | 9.77   | 10.28  | 9.63   |
| -71.55 | -80.57 | -64.90 | -61.19 | -72.14 | -7.33  | -5.46  | -5.23  | -6.82  | -2.52  | -5.61  | -6.35  | -3.46  | -2.38  | -8.10  | -19.19 | -25.99 | -24.43 | -28.96 | -23.55 | -21.74 | -23.60 | -23.38  | -18.77 | -28.77 | -26.92 | -30.06 | -24.88 |
| -23.52 | -21.26 | -18.44 | -18.08 | -18.25 | -7.83  | -4.38  | -4.90  | -7.35  | -4.42  | -4.35  | -7.48  | -3.04  | -2.66  | -14.37 | -10.59 | -10.47 | -12.53 | -11.67 | -10.66 | -12.47 | -11.12 | -13.83  | -10.96 | -11.05 | -11.29 | -8.18  | -8.97  |
| -38.37 | -37.04 | -35.40 | -30.90 | -36.27 | -13.61 | -7.11  | -8.04  | -12.89 | -4.96  | -5.52  | -12.36 | -4.52  | -4.29  | -26.68 | -23.03 | -20.08 | -22.53 | -19.57 | -21.32 | -20.98 | -23.72 | -21.91  | -18.66 | -20.29 | -18.63 | -15.05 | -17.65 |
| -9.47  | -10.38 | -7.22  | -5.24  | -3.30  | 1.00   | -1.73  | 0.82   | 3.35   | 1.83   | 2.32   | 3.21   | 0.99   | 0.14   | -1.07  | 3.00   | 1.41   | -0.92  | 1.43   | -0.79  | 0.55   | -3.83  | -2.79   | 1.96   | -1.62  | -0.92  | 0.21   | -1.50  |
| -31.35 | -30.76 | -36.61 | -31.45 | -31.52 | -23.97 | -18.65 | -21.75 | -21.66 | -18.32 | -18.55 | -17.97 | -16.28 | -15.44 | -25.51 | -24.96 | -29.56 | -28.65 | -29.61 | -33.13 | -30.80 | -34.11 | -26.57  | -28.70 | -34.01 | -30.24 | -32.64 | -35.03 |
| 2.43   | 2.67   | 5.04   | 2.62   | 4.10   | -0.09  | 1.88   | 2.29   | 1.11   | 2.03   | 1.70   | 0.45   | 1.08   | 1.17   | 2.45   | 2.71   | 3.24   | 3.36   | 3.97   | 4.54   | 2.91   | 4.50   | 1.41    | 3.22   | 3.31   | 4.09   | 3.81   | 2.77   |
| 5.31   | 6.28   | 6.44   | 6.93   | 9.28   | 1.22   | 0.00   | 0.46   | -1.25  | 0.01   | 0.39   | -1.06  | 1.22   | 0.20   | 4.87   | 7.14   | 6.63   | 5.98   | 8.14   | 7.84   | 8.70   | 9.28   | 5.57    | 5.74   | 8.05   | 5.05   | 7.67   | 7.17   |
| -0.26  | 0.80   | 3.74   | 0.51   | 1.12   | -1.60  | -0.52  | 0.46   | -1.92  | -0.48  | 0.50   | -0.85  | -0.52  | -0.25  | -1.15  | -1.43  | -0.93  | -1.01  | -1.14  | 0.99   | -1.57  | 1.21   | -2.38   | -2.46  | -1.70  | -1.68  | 0.21   | -1.42  |
| 0.07   | 1.04   | 1.06   | 1.93   | 2.61   | -1.75  | -1.07  | 0.29   | 0.26   | -0.59  | 0.52   | -0.88  | 0.33   | -1.81  | -0.82  | -1.82  | -1.33  | -0.61  | 0.22   | -0.17  | -0.61  | 0.46   | -0.94   | -2.26  | -0.30  | -0.79  | 0.12   | 0.28   |
| 0.21   | 4.56   | 5.85   | 2.19   | 2.32   | -0.32  | -0.96  | -0.12  | 1.32   | -0.84  | 1.90   | 0.09   | -0.29  | 0.19   | 1.63   | 2.05   | 2.24   | 1.53   | 1.60   | 3.12   | 0.93   | 2.10   | 0.72    | 3.71   | 2.34   | 2.12   | 2.60   | 4.50   |
| -15.16 | 5.76   | 2.15   | -7.39  | -10.35 | -4.04  | -1.20  | -0.39  | -4.16  | -3.85  | -2.06  | -5.66  | -5.04  | -2.22  | -43.31 | -56.43 | -53.32 | -38.86 | -56.16 | -38.68 | -49.73 | -43.08 | -58.37  | -32.76 | -41.60 | -27.92 | -28.29 | -30.25 |
| -15.17 | 3.63   | 7.37   | -9.10  | -7.24  | -2.99  | -4.97  | -0.82  | -2.08  | -4.67  | -5.68  | -6.12  | -7.72  | -3.01  | -61.51 | -76.95 | -70.18 | -59.90 | -70.91 | -56.25 | -68.02 | -62.40 | -76.97  | -48.91 | -60.60 | -45.72 | -48.64 | -46.01 |
| -16.06 | 0.61   | 8.46   | -9.26  | -6.26  | -3.15  | -6.49  | -1.58  | -2.15  | -7.69  | -8.05  | -10.74 | -13.11 | -5.21  | -82.45 | -96.39 | -90.30 | -81.42 | -87.11 | -75.11 | -87.33 | -83.99 | -102.41 | -72.99 | -86.88 | -70.19 | -72.73 | -71.28 |
| -6.72  | -11.17 | -4.40  | 6.16   | 3.80   | -2.76  | -3.90  | -2.46  | -4.05  | -2.50  | -4.30  | -4.17  | -4.77  | -4.55  | 6.35   | 4.70   | 5.02   | 5.91   | 7.79   | 7.74   | 6.86   | 5.52   | 3.47    | 7.73   | 6.89   | 6.53   | 8.08   | 5.96   |
| -10.15 | -14.45 | -7.10  | 4.15   | 1.95   | -4.50  | -4.40  | -4.29  | -4.26  | -2.99  | -2.97  | -4.57  | -5.33  | -6.00  | 8.32   | 6.14   | 8.86   | 7.57   | 9.55   | 10.16  | 6.78   | 8.21   | 4.92    | 5.51   | 7.59   | 7.48   | 7.79   | 6.89   |
| -32.72 | -42.06 | -33.42 | -36.69 | -29.13 | 9.66   | 11.27  | 10.29  | 9.34   | 9.69   | 11.74  | 9.98   | 14.09  | 14.71  | -18.00 | -20.92 | -17.04 | -13.94 | -14.66 | -12.54 | -17.08 | -17.44 | -18.90  | -20.15 | -17.00 | -13.05 | -11.25 | -12.82 |
| 6.50   | 7.99   | 3.51   | 2.95   | 3.65   | 0.87   | 1.00   | 1.44   | -1.01  | 1.62   | 0.91   | 1.31   | 0.56   | 0.89   | 3.18   | 7.71   | 4.46   | 5.90   | 2.37   | 4.68   | 4.76   | 6.14   | 2.27    | 6.30   | 4.17   | 4.98   | 3.52   | 5.43   |
| 69.69  | 55.51  | 62.76  | 62.12  | 80.09  | 21.44  | 12.68  | 16.29  | 27.35  | 14.04  | 13.74  | 25.03  | 10.63  | 7.07   | 51.84  | 38.16  | 45.99  | 46.71  | 54.43  | 48.44  | 47.59  | 50.46  | 41.33   | 38.01  | 46.52  | 45.32  | 46.59  | 49.47  |
| 0.50   | -5.93  | -1.64  | 1.74   | -8.41  | 3.36   | 2.07   | 1.84   | 1.97   | 5.27   | 3.46   | 3.07   | 3.43   | 2.75   | -2.04  | -4.36  | -1.50  | 0.46   | -1.54  | -0.67  | 0.86   | -2.67  | -0.37   | 3.53   | 1.90   | -0.28  | 1.80   | 0.93   |
| -11.35 | -16.80 | -8.70  | -10.82 | -8.83  | -0.60  | 0.46   | 1.75   | -0.38  | 2.34   | 1.19   | 0.71   | 1.50   | 1.25   | -3.16  | -1.93  | -1.75  | -3.86  | -4.44  | -3.04  | -2.48  | -3.39  | -2.03   | -1.59  | -2.51  | -3.54  | -3.06  | -1.70  |
| -12.89 | -16.17 | -10.57 | -11.74 | -10.03 | -1.00  | -0.14  | 1.78   | 0.01   | 1.18   | 1.51   | -0.30  | 1.25   | 0.86   | -4.11  | -3.66  | -4.05  | -4.18  | -6.13  | -4.59  | -3.10  | -5.51  | -4.22   | -2.52  | -4.61  | -3.38  | -4.73  | -3.06  |
| -5.20  | -8.39  | -3.63  | -5.54  | -2.08  | -1.81  | 1.83   | 1.06   | -2.15  | 1.28   | 1.26   | -1.42  | 0.92   | 0.82   | -2.09  | -0.83  | -0.88  | -2.27  | -2.49  | -1.70  | -4.47  | -2.48  | 0.52    | 0.06   | -0.50  | -0.23  | 3.65   | -0.35  |
| 3.71   | 13.40  | 8.21   | 6.59   | 4.49   | -4.48  | -2.21  | -2.19  | -3.41  | -2.65  | -2.30  | -3.38  | -2.00  | -2.83  | 5.50   | 3.47   | 6.68   | 7.71   | 6.52   | 6.32   | 7.01   | 8.26   | 2.83    | 4.39   | 6.70   | 5.60   | 7.98   | 4.37   |
| 18.79  | 28.05  | 22.63  | 15.11  | 14.36  | -6.79  | -3.79  | -3.31  | -4.39  | -3.06  | -3.66  | -5.03  | -3.40  | -4.41  | 10.98  | 6.83   | 12.34  | 16.23  | 17.77  | 13.45  | 16.58  | 15.74  | 6.42    | 4.87   | 13.08  | 13.18  | 13.93  | 12.39  |
| -15.21 | -23.44 | -14.00 | -6.83  | -10.64 | 0.08   | -0.38  | -0.04  | -1.10  | 0.58   | -0.01  | -1.40  | 0.67   | 0.20   | -1.08  | 0.46   | -2.00  | -0.81  | 1.18   | -0.28  | -0.59  | 1.48   | -1.52   | 0.10   | -1.76  | 0.48   | 1.77   | 0.36   |
| 0.00   | 2.19   | 2.67   | 3.95   | 1.16   | -1.14  | -0.99  | 0.98   | -1.16  | -0.38  | 0.39   | -0.83  | 0.29   | -0.05  | -0.41  | -1.89  | -0.23  | 0.33   | -0.20  | 0.66   | 0.33   | 0.73   | -1.66   | -0.52  | 0.12   | 0.62   | 2.82   | 2.14   |
| -1.28  | 1.32   | 1.30   | 2.85   | 1.93   | -1.68  | -0.87  | -0.52  | -0.54  | -0.44  | -0.07  | -0.73  | -0.25  | 0.23   | -3.41  | -4.95  | -4.54  | -3.33  | -2.70  | -2.48  | -4.75  | -3.23  | -4.54   | -2.52  | -2.48  | -1.92  | 1.80   | -2.07  |
| -3.81  | -0.89  | -2.42  | 1.59   | -2.15  | -4.13  | -3.62  | -1.75  | -2.95  | -2.11  | -1.24  | -2.14  | -2.16  | 0.16   | -11.97 | -13.50 | -13.37 | -12.82 | -14.93 | -12.21 | -16.45 | -12.43 | -15.35  | -6.16  | -11.72 | -8.66  | -7.22  | -10.05 |
| -5.27  | -5.82  | 9.90   | 16.88  | 17.84  | -6.76  | -8.72  | -6.21  | -4.98  | -5.30  | -6.82  | -5.83  | -8.48  | -10.84 | 12.83  | 12.09  | 11.45  | 10.15  | 11.21  | 10.85  | 9.22   | 12.73  | 13.94   | 13.82  | 11.98  | 8.78   | 9.26   | 11.70  |
| -8.91  | -9.82  | 7.84   | 19.19  | 17.26  | -7.25  | -9.97  | -9.15  | -7.15  | -8.81  | -9.10  | -8.06  | -9.74  | -11.87 | 12.41  | 13.72  | 12.73  | 10.56  | 12.58  | 12.93  | 12.06  | 11.41  | 13.01   | 12.49  | 9.81   | 10.48  | 10.27  | 12.26  |
| -20.90 | -27.62 | -20.26 | -15.79 | -12.25 | 5.71   | 4.95   | 7.59   | 6.26   | 7.47   | 7.26   | 6.37   | 7.65   | 8.88   | -9.32  | -7.92  | -7.48  | -4.71  | -4.51  | -6.50  | -5.98  | -5.39  | -6.83   | -9.17  | -7.16  | -4.39  | -5.27  | -4.57  |
| -3.38  | -4.83  | -1.17  | -1.41  | -1.59  | -1.08  | -0.88  | 0.14   | -1.95  | -0.01  | 0.61   | -1.99  | 0.37   | 0.01   | 2.60   | 1.15   | 0.08   | 0.24   | 2.03   | 2.21   | 2.54   | 1.49   | -0.86   | 0.40   | 1.42   | -1.18  | 2.95   | 1.00   |
| -5.47  | -4.75  | -3.74  | -5.15  | -2.49  | -1.12  | -0.81  | -0.41  | 0.93   | 1.09   | 0.97   | 0.86   | 0.54   | 0.09   | -1.90  | -2.73  | -2.03  | -0.39  | -0.78  | 0.36   | -0.53  | 0.19   | -2.70   | -2.01  | -0.79  | -0.47  | 1.73   | -0.43  |
| 2.63   | 5.24   | 4.54   | 4.88   | 1.53   | -0.89  | -0.96  | 0.81   | 0.54   | 0.36   | 0.06   | -1.00  | -0.35  | -1.39  | 2.86   | 0.16   | 1.07   | 2.94   | 2.10   | 3.90   | 1.03   | 2.81   | 2.32    | 1.83   | 3.35   | 2.57   | 3.55   | 2.33   |
| 27.46  | 27.01  | 31.26  | 26.66  | 31.41  | 4.43   | -0.72  | 4.37   | 5.31   | 1.71   | 2.57   | 4.92   | 1.37   | 0.28   | 16.34  | 15.38  | 18.48  | 15.08  | 18.68  | 17.77  | 16.40  | 16.14  | 13.50   | 13.74  | 17.72  | 18.04  | 21.43  | 20.97  |
| 94.40  | 94.30  | 97.25  | 88.90  | 117.20 | 13.99  | 8.21   | 8.76   | 16.56  | 7.70   | 8.52   | 14.30  | 5.19   | 3.75   | 42.34  | 29.75  | 40.48  | 38.68  | 45.63  | 41.21  | 40.23  | 43.67  | 41.95   | 28.48  | 45.15  | 40.09  | 51.00  | 44.08  |
| -33.44 | -41.90 | -33.84 | -32.88 | -56.19 | -9.83  | -4.26  | -4.74  | -11.60 | -2.61  | -4.14  | -11.04 | -2.75  | -4.38  | -23.12 | -18.75 | -19.10 | -19.60 | -19.15 | -16.46 | -15.38 | -21.14 | -16.27  | -15.53 | -19.97 | -16.10 | -16.79 | -16.18 |
| -17.19 | -9.17  | -2.55  | -7.08  | -1.39  | -3.19  | -4.34  | -0.88  | -4.12  | -2.78  | -1.28  | -3.26  | -5.25  | -4.10  | -53.88 | -56.11 | -47.46 | -51.01 | -56.04 | -48.49 | -44.96 | -47.68 | -55.52  | -35.26 | -46.04 | -28.04 | -38.52 | -28.20 |
| -14.53 | -5.79  | -2.12  | -6.56  | 3.39   | -3.36  | -4.98  | -0.44  | -4.17  | -3.98  | -2.34  | -4.14  | -5.10  | -5.26  | -73.88 | -74.93 | -64.49 | -70.17 | -75.39 | -68.32 | -66.20 | -68.59 | -76.14  | -49.15 | -64.99 | -43.94 | -55.03 | -46.27 |
| -19.52 | -6.71  | -7.21  | -8.21  | 5.58   | -4.83  | -6.63  | -1.33  | -4.57  | -4.70  | -5.10  | -4.57  | -7.02  | -7.69  | -96.13 | -93.25 | -84.60 | -88.43 | -92.97 | -89.58 | -86.43 | -88.69 | -104.18 | -70.02 | -91.00 | -67.03 | -82.19 | -71.48 |
| 8.66   | 3.62   | 7.55   | 17.80  | 9.44   | -6.88  | -6.46  | -5.83  | -7.42  | -3.86  | -7.48  | -6.21  | -7.47  | -8.26  | 11.85  | 11.94  | 11.34  | 8.92   | 11.43  | 10.65  | 10.40  | 10.00  | 9.68    | 14.06  | 10.95  | 9.54   | 10.19  | 11.03  |
| 4.25   | -2.00  | 5.34   | 15.47  | 7.67   | -7.08  | -8.06  | -6.85  | -6.99  | -6.28  | -5.82  | -8.03  | -8.09  |        |        |        |        |        |        |        |        |        |         |        |        |        |        |        |

| 109    | 110    | 111    | 112    | 113    | 114    | 115    | 116    | 117    | 118    | 119             | 120             | 121             | 122             | 123             | 124             | 125             | 126             | 127             | 128             | 129             | 130             | 131             | 132             | 133             | 134        | 135        | 136        |      |
|--------|--------|--------|--------|--------|--------|--------|--------|--------|--------|-----------------|-----------------|-----------------|-----------------|-----------------|-----------------|-----------------|-----------------|-----------------|-----------------|-----------------|-----------------|-----------------|-----------------|-----------------|------------|------------|------------|------|
| VRE 15 | VRE 16 | VRE 17 | VRE 18 | VRE 19 | VRE 20 | VRE 21 | VRE 22 | VRE 23 | VRE 24 | E. coli 25922 1 | E. coli 25922 2 | E. coli 25922 3 | E. coli 25922 4 | E. coli 25922 5 | E. coli 25922 6 | E. coli 53502 1 | E. coli 53502 2 | E. coli 53502 3 | E. coli 53502 4 | E. coli 53502 5 | E. coli 53502 6 | E. coli 53502 7 | E. coli 53502 8 | E. coli 53502 9 | faecalis 1 | faecalis 2 | faecalis 3 |      |
| 0.09   | 0.97   | 0.96   | 1.08   | 0.60   | -0.06  | 0.25   | -0.06  | 0.41   | 0.68   | 0.51            | -0.39           | -0.95           | -0.08           | -1.31           | 1.51            | -0.11           | -0.39           | 0.32            | 0.53            | -0.42           | -0.59           | -0.57           | 0.24            | 0.51            | 0.07       | 0.77       | -0.39      |      |
| -0.06  | -0.52  | -0.03  | -0.03  | -0.06  | -0.20  | 1.00   | 0.35   | 0.41   | -0.42  | -0.93           | 0.37            | 0.54            | -0.72           | -0.21           | -1.08           | 0.26            | 0.43            | 0.34            | -0.26           | -0.10           | 0.39            | 0.23            | -0.09           | -0.14           | 0.04       | 0.03       | 0.20       |      |
| -0.04  | 2.15   | 0.62   | 0.68   | 0.28   | -0.27  | 0.37   | 1.83   | 0.53   | 0.74   | 0.84            | -0.77           | -0.60           | 0.41            | -0.14           | -0.48           | 0.12            | 0.17            | -0.11           | -0.35           | -0.21           | -0.55           | -0.92           | -0.64           | -0.24           | -0.22      | 2.05       | 1.11       |      |
| -0.69  | 0.86   | 0.21   | 0.10   | -0.48  | -0.43  | 0.30   | -1.86  | -0.45  | -0.68  | -0.75           | -0.34           | -1.49           | -1.66           | 0.45            | -0.68           | 0.80            | 0.50            | -0.31           | 0.17            | -0.21           | 0.10            | 0.03            | -0.49           | 0.32            | -1.01      | 0.54       | -0.24      |      |
| -0.08  | 0.14   | -0.06  | 0.41   | -1.10  | -0.54  | -1.12  | 0.21   | 0.40   | -0.68  | -0.14           | 0.45            | -0.16           | 1.04            | -0.63           | 0.56            | -1.01           | -0.44           | -0.28           | 0.02            | -0.16           | -0.20           | 0.45            | -0.19           | 0.44            | 0.17       | 1.08       | 0.60       |      |
| 0.74   | 1.48   | 0.09   | 1.29   | -1.11  | -2.06  | -1.70  | 0.47   | -0.41  | -1.47  | 0.73            | 0.09            | 1.62            | 0.30            | 1.03            | 0.24            | 1.86            | -0.06           | -0.16           | -0.52           | 0.48            | -0.32           | -0.76           | -0.47           | -0.24           | -0.53      | 0.58       | -0.68      |      |
| -0.26  | -0.37  | -0.48  | -1.23  | -0.22  | -0.12  | -0.89  | 0.99   | 0.37   | -0.65  | 0.06            | -0.08           | -0.67           | -0.51           | -0.74           | -1.40           | 0.45            | 0.18            | 0.60            | -0.28           | -0.96           | 0.46            | 0.60            | 0.23            | -0.38           | -0.01      | -0.04      | 0.96       |      |
| 0.18   | 0.54   | 1.72   | 0.68   | -0.30  | 0.77   | 1.36   | 1.29   | 0.35   | 0.09   | -1.01           | 0.81            | 0.77            | 0.06            | 0.24            | -0.46           | 0.11            | 0.29            | 0.19            | 0.39            | 0.88            | 0.03            | -0.21           | -0.04           | 0.54            | 0.45       | 1.21       | -0.37      |      |
| 0.63   | -0.33  | -0.17  | 1.62   | -0.82  | 2.49   | 1.98   | 1.77   | 0.44   | 1.65   | 1.26            | -1.13           | -0.41           | 0.12            | -0.37           | 0.34            | 0.23            | 0.39            | 0.52            | 1.22            | -0.01           | 0.80            | 0.61            | 1.67            | -0.63           | -0.42      | 0.77       | 0.51       |      |
| -0.02  | -0.71  | -1.75  | -1.26  | 2.76   | 1.40   | -1.02  | 1.38   | -0.26  | -0.95  | 1.34            | 3.80            | 2.35            | 0.58            | 0.65            | 2.95            | 0.44            | 0.23            | 0.26            | -1.30           | -1.49           | 0.46            | 0.38            | 0.83            | 0.66            | -0.18      | 1.25       | 0.35       |      |
| -0.19  | 0.07   | -4.49  | -1.94  | 3.64   | -2.45  | -6.76  | 0.65   | 0.00   | -1.03  | 1.56            | 3.38            | 3.03            | 1.88            | 0.96            | 3.37            | -0.13           | -1.05           | -0.04           | 0.46            | -3.02           | 1.23            | 0.95            | 0.90            | -0.23           | -0.21      | -0.74      | 0.94       |      |
| -2.75  | -0.16  | -1.49  | 0.99   | 3.94   | -0.99  | -2.33  | 2.77   | 0.84   | 1.20   | -1.56           | 0.13            | -0.98           | -2.16           | -1.78           | -1.08           | 0.88            | 0.15            | -0.74           | -0.35           | -1.53           | 0.99            | 2.18            | 1.85            | 0.46            | -0.38      | 1.10       | -0.75      |      |
| -1.16  | -0.57  | -3.10  | 0.77   | -6.22  | -4.54  | -6.36  | -5.81  | -1.55  | -3.78  | 0.00            | 1.14            | 0.29            | 0.58            | -0.15           | 1.10            | 1.57            | 0.46            | -0.19           | -0.88           | 0.41            | 0.61            | -0.42           | 0.70            | 0.20            | 0.74       | -0.09      | 2.81       |      |
| -1.41  | -0.44  | -2.81  | 0.06   | -4.79  | -0.59  | -0.23  | -4.72  | -1.38  | -0.80  | -0.18           | 0.53            | -0.72           | -0.91           | 0.15            | 0.66            | 0.37            | -0.34           | -0.50           | -0.59           | -0.76           | 0.09            | 0.52            | -0.98           | 0.11            | 0.42       | -0.26      | -0.58      |      |
| -0.28  | -0.65  | -0.49  | -1.38  | 0.42   | -0.03  | -0.64  | -1.16  | 0.08   | -0.59  | -0.18           | 0.16            | 0.29            | -0.27           | -0.21           | 0.11            | 0.79            | 1.36            | -1.26           | 1.35            | 1.55            | -0.64           | -0.28           | -0.19           | 0.06            | 0.46       | 0.58       | 0.70       |      |
| 0.05   | 1.23   | 1.32   | 1.01   | 1.77   | -0.48  | 1.33   | 0.96   | -0.67  | 0.43   | 0.50            | 0.13            | 1.43            | 0.20            | 1.55            | 0.47            | 1.38            | 0.45            | -0.46           | 0.19            | 1.15            | 0.00            | 1.57            | 0.97            | 1.82            | 0.25       | 0.39       | 0.73       |      |
| -0.66  | -0.94  | -0.41  | 0.50   | -0.35  | -0.65  | -0.76  | -0.28  | -0.90  | 0.01   | 0.00            | -0.09           | -0.72           | 0.15            | -0.26           | -1.01           | -0.13           | 0.08            | -0.53           | -0.44           | -0.70           | 0.34            | -0.84           | -1.10           | -1.05           | -0.62      | -0.18      | -0.18      |      |
| 0.30   | 0.63   | 0.79   | 1.61   | 0.72   | -0.51  | 1.01   | -0.79  | 0.89   | 0.13   | 0.61            | 1.39            | 1.09            | 0.43            | 0.37            | 0.58            | -0.02           | -0.61           | 0.56            | 1.47            | -0.08           | 0.12            | 1.88            | -0.39           | 0.17            | 2.11       | 1.97       | 0.74       |      |
| -0.72  | -0.94  | -0.84  | -0.71  | 0.66   | -0.68  | -2.48  | 0.00   | -0.21  | -0.23  | -1.65           | -1.08           | -1.10           | -0.28           | -0.52           | -0.45           | -0.42           | -0.99           | -1.27           | -0.17           | -0.24           | -0.99           | -0.74           | 0.37            | -0.44           | -0.50      | 0.39       | -0.37      |      |
| -1.03  | -0.87  | -0.98  | -0.07  | -0.36  | -0.56  | 0.48   | -0.23  | -0.24  | -0.53  | -1.13           | -0.48           | -0.55           | -0.71           | -0.99           | -1.02           | -0.09           | -0.83           | -0.85           | -1.11           | -0.07           | -0.40           | -0.93           | -0.74           | -0.08           | -0.68      | -1.16      | -0.82      |      |
| -0.95  | 0.08   | 0.88   | 0.17   | -0.86  | -0.59  | -0.83  | 0.14   | -0.57  | 0.65   | -0.50           | -1.00           | 1.02            | -0.39           | -0.81           | -0.26           | -0.13           | -0.60           | 1.47            | 0.36            | -0.33           | -0.87           | -1.03           | -0.49           | -1.59           | -0.50      | 2.09       | 0.57       |      |
| 0.72   | 1.90   | 1.10   | 1.31   | 0.93   | 0.74   | 1.19   | 0.36   | 0.42   | 1.31   | 0.25            | 0.50            | 1.13            | 0.02            | -0.23           | -0.16           | 0.42            | 1.28            | 0.05            | 0.40            | -0.09           | 0.39            | 0.86            | 0.40            | 0.55            | 0.51       | 1.13       | 2.06       | 0.14 |
| 0.34   | 0.26   | 1.44   | 0.85   | 0.34   | 0.74   | 1.84   | 1.41   | 1.17   | 1.70   | 0.40            | -0.09           | 0.05            | 0.08            | 0.34            | 0.59            | 0.42            | -0.48           | 0.01            | -0.37           | 0.21            | 1.10            | 0.11            | 0.57            | 0.20            | -0.07      | 0.56       | 0.29       |      |
| 0.66   | -0.74  | 0.87   | 0.31   | 0.26   | -1.23  | 0.66   | -1.69  | -1.21  | -1.30  | -0.23           | -0.55           | -0.09           | 1.12            | 1.10            | 0.19            | 0.01            | 0.03            | 0.85            | -0.16           | -0.37           | -1.13           | -0.27           | -0.19           | -0.18           | 1.43       | -0.82      | -0.18      |      |
| -0.72  | 1.13   | 0.62   | 0.88   | -1.28  | -0.48  | -1.45  | -0.12  | 0.26   | 0.41   | -0.63           | 1.28            | 0.11            | 0.32            | -0.77           | 1.15            | 0.26            | -2.00           | 0.14            | -0.03           | 0.10            | -0.05           | -0.05           | 0.06            | 0.28            | -0.39      | 1.39       | 1.36       |      |
| 0.95   | -0.38  | -0.55  | 0.49   | -0.95  | -2.15  | -1.68  | -2.66  | -0.06  | -1.57  | -0.43           | 1.61            | 0.07            | 1.17            | 0.96            | 0.27            | -0.15           | 0.89            | -0.06           | 0.10            | -0.07           | 0.39            | 0.14            | 0.15            | -0.20           | 1.14       | 1.59       | 0.99       |      |
| 0.46   | -0.13  | -1.58  | 1.71   | -0.99  | -1.02  | -1.95  | -1.00  | 0.32   | -0.82  | 0.25            | 0.15            | -0.62           | -0.31           | 0.30            | -0.11           | 0.25            | 1.23            | 0.63            | 0.22            | -0.52           | -0.82           | 0.09            | 0.46            | 0.10            | 0.09       | -0.40      | 0.97       |      |
| 1.26   | 0.81   | 1.19   | 1.91   | -1.86  | -0.98  | -3.11  | -0.72  | -0.19  | -1.38  | 0.34            | 0.07            | 0.26            | 0.46            | 0.63            | -1.02           | -1.28           | -0.74           | 0.61            | -1.21           | 0.11            | 0.18            | 0.54            | 0.13            | -0.56           | 0.84       | 0.03       | 0.54       |      |
| 0.93   | 0.17   | 0.30   | -0.06  | -1.78  | -2.63  | -4.30  | -2.05  | -0.90  | -2.29  | -0.12           | -0.21           | 0.34            | 0.37            | 0.40            | 0.29            | 0.66            | -0.23           | 0.40            | -1.00           | -0.46           | 0.36            | 0.36            | 0.27            | -0.15           | 0.70       | -0.08      | 1.03       |      |
| 0.91   | -0.85  | 1.47   | 1.65   | -0.90  | -1.06  | -0.66  | -0.99  | 0.93   | -2.13  | 0.65            | -0.31           | -2.55           | 0.04            | -1.41           | 1.54            | 0.52            | 0.02            | 0.90            | 0.77            | 0.04            | -2.14           | 0.28            | 0.20            | -0.25           | -0.74      | 0.39       | 0.76       |      |
| -0.25  | 1.20   | 0.34   | 1.02   | 0.72   | 0.17   | -0.05  | 0.40   | 0.57   | 0.57   | 0.82            | 1.01            | -1.14           | -0.41           | 0.54            | 0.61            | 0.20            | 0.61            | -1.30           | -1.74           | -0.88           | 0.20            | 0.26            | 0.82            | 0.41            | -0.27      | 1.10       | 0.08       |      |
| 0.02   | 0.38   | 0.57   | 0.42   | -0.41  | -0.42  | -0.51  | 0.30   | -0.14  | -0.39  | -0.78           | -1.36           | 0.01            | -0.21           | -0.46           | 1.70            | 0.01            | -0.88           | 0.59            | 0.50            | 0.10            | -0.12           | -0.51           | -0.03           | -0.15           | -0.78      | 1.22       | -0.68      |      |
| -0.21  | -1.33  | 0.90   | -1.09  | -0.42  | 1.34   | 1.44   | 1.36   | 0.90   | 1.66   | -0.21           | 0.28            | -0.59           | -0.25           | -1.10           | -0.05           | 0.44            | 0.60            | 0.31            | 0.46            | -1.75           | -0.21           | 1.34            | 0.91            | -0.09           | -1.15      | 1.65       | 2.61       |      |
| -3.91  | -1.35  | -0.66  | 0.66   | -0.07  | 0.75   | 0.34   | 2.48   | 0.94   | 0.22   | 0.84            | 1.06            | -0.06           | -0.34           | -0.27           | 0.72            | 0.48            | 0.40            | -0.17           | -0.58           | -0.07           | 0.04            | 0.50            | 1.08            | 1.13            | 0.47       | -0.28      | -0.49      |      |
| 0.60   | -0.49  | 0.77   | 1.11   | -0.66  | 0.13   | 0.17   | -0.49  | 0.17   | 0.87   | 1.22            | 0.66            | 0.63            | 0.50            | 0.14            | 0.02            | 0.67            | 0.39            | 0.08            | 0.26            | 0.61            | 0.97            | 0.39            | 0.33            | 0.68            | 1.00       | 1.56       | 0.99       |      |
| 1.64   | 1.76   | 1.43   | 2.84   | -1.18  | 0.54   | 1.13   | 1.17   | -0.08  | 0.81   | 1.28            | 1.04            | 0.81            | 2.32            | -0.17           | 1.77            | 0.10            | 1.36            | 0.55            | 0.41            | 2.15            | 1.54            | 1.40            | -0.10           | 0.56            | 2.12       | 2.05       | 1.51       |      |
| 0.25   | 0.23   | 1.06   | 0.17   | 0.90   | -0.22  | -0.19  | 0.26   | 0.38   | 0.70   | 1.65            | 0.58            | -0.42           | 0.02            | 0.97            | 1.12            | 0.99            | 0.74            | 1.23            | -0.68           | 0.33            | 0.21            | 0.78            | 1.43            | 0.25            | 1.06       | 0.63       | -1.30      |      |
| 0.66   | 0.12   | 1.23   | 1.38   | 0.74   | 0.23   | 1.28   | 0.47   | 0.37   | 0.91   | 1.10            | 0.70            | 0.67            | 0.52            | -0.03           | 0.40            | 0.81            | -0.13           | 0.31            | 0.55            | 0.12            | 0.17            | 0.29            | 0.59            | 0.20            | -0.03      | 0.70       | 1.67       |      |
| 0.57   | 0.46   | 0.29   | -0.25  | 0.37   | 0.17   | -0.57  | 1.07   | 0.20   | 0.42   | 0.39            | 0.42            | 0.72            | 0.86            | -0.49           | 0.97            | 0.48            | -0.08           | -1.79           | 0.67            | 0.40            | 0.15            | -2.16           | -0.47           | 0.34            | 0.86       | 1.40       | 0.60       |      |
| -1.53  | 0.48   | -0.13  | -0.08  | -0.98  | 0.34   | -1.74  | -1.59  | -0.25  | -0.56  | -0.43           | 0.37            | 0.66            | 0.59            | -0.37           | 0.39            | 0.35            | -0.71           | -0.19           | -0.18           | -0.17           | -0.66           | 1.26            | -0.14           | 0.14            | 0.38       | -0.60      | 0.17       |      |
| 0.33   | 0.74   | 0.10   | 1.64   | 0.36   | -0.69  | 0.10   | 1.37   | 0.10   | 1.14   | 1.10            | 0.78            | -0.95           | 0.14            | 0.96            | -0.32           | -0.09           | -0.15           | 0.13            | 0.44            | -0.43           | -0.15           | -0.68           | -0.34           | -0.70           | -0.19      | 1.61       | 0.48       |      |
| 1.56   | -0.06  | 0.95   | 0.42   | -0.05  | 1.22   | -0.32  | -0.02  | 0.22   | 0.17   | -0.61           | 0.22            | 2.10            | -1.39           | -0.02           | 1.20            | 0.11            | -0.47           | -0.90           | -1.37           | 1.05            | -0.53           | 0.17            | -0.95           | -0.20           | 1.82       | 0.89       | 0.19       |      |
| 1.18   | 0.78   | -0.26  | 0.65   | 0.76   | 0.45   | 0.92   | 0.94   | -0.14  | 0.29   | 0.63            | 0.68            | 1.83            | 1.10            | 0.84            | 0.77            | 1.43            | 0.73            | 0.18            | 0.18            | -0.32           | 0.62            | -0.02           | 0.81            | -0.02           | 0.23       | 1.99       | 1.41       |      |
| 0.24   | -0.12  | 1.72   | 1.39   | 0.69   | 0.13   | 1.92   | 0.65   | 0.09   | 0.77   | -0.69           | -0.03           | -0.59           | -0.15           | -0.53           | -0.30           | -0.16           | -0.01           | -0.07           | -0.25           | -0.36           | 0.00            | 0.39            | -0.44           | 0.07            | -0.27      | 0.54       | -0.51      |      |
| 0.38   | 1.39   | 0.66   | 0.46   | -0.97  | -1.06  | 0.29   | 0.47   | 0.21   | 0.39   | 0.19            | -0.06           | 0.46            | -0.16           | 0.28            | 0.51            | 0.76            | -0.03           | -0.79           | 0.19            | -1.20           | 0.85            | -1.31           | -0.64           | -0.24           | -0.41      | -0.06      | 0.18       |      |
| -0.90  | -0.86  | 0.05   | 0.75   | -1.14  | -2.03  | -4.11  | -1.28  | 0.11   | -0.85  | 0.59            | 0.54            | 1.25            | 0.34            | 0.41            | 1.43            | 0.01            | -0.14           | -0.10           | -0.43</         |                 |                 |                 |                 |                 |            |            |            |      |

|       |       |       |       |       |       |        |        |       |       |       |       |       |       |       |       |       |       |       |       |       |       |       |       |       |       |       |       |      |
|-------|-------|-------|-------|-------|-------|--------|--------|-------|-------|-------|-------|-------|-------|-------|-------|-------|-------|-------|-------|-------|-------|-------|-------|-------|-------|-------|-------|------|
| -1.94 | -0.83 | 1.00  | 0.39  | 0.10  | 0.23  | -0.73  | 0.27   | 0.57  | 1.50  | -0.09 | 0.31  | -0.53 | -0.65 | 0.95  | 0.14  | -1.12 | 0.19  | 0.37  | -0.54 | 0.20  | 0.50  | -0.33 | 0.55  | 0.22  | -0.52 | 1.04  | 0.44  |      |
| 0.23  | 0.23  | 0.20  | 0.66  | -0.41 | 0.34  | 0.02   | 0.65   | 0.79  | -0.36 | 0.38  | 0.34  | -0.34 | 0.88  | -0.21 | 0.90  | 0.99  | 0.81  | 0.39  | 0.14  | 0.06  | 0.20  | 0.80  | 0.09  | 0.54  | 0.04  | 1.59  | 1.88  |      |
| 2.06  | 0.70  | -1.24 | 0.05  | 0.02  | 2.25  | 0.85   | 0.23   | 0.62  | 0.93  | 0.28  | 0.17  | -0.14 | 0.62  | 1.07  | 0.59  | -0.42 | -0.41 | 0.24  | 0.39  | -0.23 | 1.13  | 0.11  | 0.44  | 0.66  | -0.21 | 1.74  | 0.94  |      |
| 1.03  | -0.11 | 0.86  | 1.23  | 1.38  | -0.35 | 1.14   | 0.90   | 0.58  | 0.66  | -0.30 | -1.44 | 0.50  | -0.33 | -0.86 | 0.40  | 0.25  | -0.35 | -1.37 | 0.38  | -0.54 | -0.05 | -0.25 | 0.18  | 1.04  | 0.70  | 1.63  | -0.10 |      |
| 0.17  | 0.20  | -0.07 | -0.36 | -0.19 | -0.14 | 0.24   | 0.81   | 0.32  | 0.87  | -0.66 | 0.02  | -0.28 | -0.34 | 0.07  | -0.34 | -0.18 | 0.50  | -0.30 | -0.29 | -0.50 | 0.05  | -0.42 | 0.10  | -0.17 | 0.79  | 0.97  | 0.90  |      |
| -0.46 | 1.55  | 0.72  | 1.24  | 0.21  | -0.05 | 2.03   | 0.97   | 0.57  | 0.53  | 0.75  | -0.46 | -0.61 | -0.65 | -0.67 | -0.71 | -0.28 | 0.11  | -0.78 | 0.48  | -0.50 | 0.72  | -0.19 | 0.41  | 0.66  | 0.00  | 0.68  | 1.66  |      |
| 0.08  | 0.16  | 0.03  | -0.39 | 0.24  | -0.94 | -2.66  | -2.19  | -0.26 | -0.43 | 0.22  | 0.17  | -1.14 | -0.71 | 0.74  | -1.18 | 0.18  | 0.66  | -0.25 | -0.14 | -0.10 | -0.73 | -0.04 | 0.42  | 0.54  | 0.08  | 1.00  | 0.95  |      |
| 0.30  | 0.45  | -0.41 | -0.12 | -0.98 | -0.70 | -2.56  | -3.31  | 0.03  | -0.38 | -0.12 | 0.12  | 0.07  | 0.38  | -0.05 | 0.38  | 0.12  | -0.41 | -0.02 | 0.12  | -0.09 | 0.29  | 0.22  | -0.88 | 0.19  | 1.18  | 0.40  | 0.94  |      |
| 1.56  | 0.50  | -0.59 | 0.85  | -0.94 | -1.75 | -6.55  | -1.16  | -0.96 | -2.32 | 0.33  | 1.89  | 2.04  | -0.02 | 0.46  | -0.07 | 1.52  | 1.07  | -1.33 | 0.44  | 0.52  | 0.81  | -0.05 | 0.55  | 0.00  | 0.73  | 1.01  | 1.01  |      |
| 0.83  | 0.58  | -0.23 | -1.86 | 0.22  | -0.50 | -0.17  | 1.04   | -0.59 | 0.32  | 0.14  | -0.03 | -0.44 | -0.33 | -1.11 | 0.76  | 1.21  | -0.07 | 0.10  | 0.68  | -0.40 | 0.25  | 0.24  | 0.77  | 0.29  | 0.39  | 0.92  | 1.81  |      |
| -0.19 | 0.26  | 1.56  | 1.43  | -0.35 | 1.20  | 3.19   | 1.69   | 1.01  | 0.58  | -0.12 | 0.70  | 0.99  | -0.64 | 0.84  | 0.78  | 0.10  | 0.77  | 0.37  | 0.47  | 0.26  | 0.03  | -0.19 | -0.45 | 0.00  | 0.03  | 0.93  | 1.59  | 0.97 |
| 1.41  | -0.39 | 0.94  | 0.55  | 1.66  | 2.37  | 4.44   | 1.91   | 0.94  | 2.04  | 1.26  | -1.21 | 0.62  | 1.90  | 0.07  | 1.83  | 0.37  | 0.50  | 0.60  | -0.01 | 0.76  | 0.80  | 0.75  | 2.12  | -0.04 | 1.90  | 0.63  | 1.56  |      |
| 0.33  | -1.53 | -2.94 | -2.61 | -2.18 | 1.03  | -2.11  | 1.61   | 0.56  | -1.07 | 3.74  | 7.38  | 6.47  | 2.71  | 3.50  | 6.81  | 0.03  | -0.03 | -1.31 | -0.47 | -0.08 | -0.78 | 1.37  | 0.65  | 0.19  | 0.38  | 0.98  | 1.35  |      |
| -0.97 | -3.63 | -7.30 | -3.14 | -0.24 | -2.81 | -10.10 | 0.15   | -0.21 | -3.25 | 5.72  | 9.53  | 8.16  | 7.40  | 4.70  | 11.12 | 0.83  | -1.29 | 0.50  | 1.01  | -1.51 | 1.45  | 1.19  | 0.69  | -0.35 | -0.75 | 0.60  | 1.72  |      |
| -3.39 | -1.92 | -2.03 | 0.12  | 3.58  | -0.52 | -3.03  | 3.14   | -0.24 | -0.47 | -4.47 | -2.21 | -3.80 | -5.74 | -2.59 | -3.03 | 1.74  | 0.80  | 0.06  | -0.06 | 0.22  | -0.44 | -0.12 | 0.31  | 1.27  | -2.27 | 2.02  | -2.13 |      |
| -0.10 | -1.07 | -3.44 | 2.23  | -9.37 | -5.98 | -10.24 | -10.04 | -1.88 | -6.02 | 3.35  | 5.53  | 4.30  | 6.05  | 2.86  | 3.50  | 0.74  | 0.67  | -1.14 | -0.28 | 1.08  | 1.23  | -0.40 | -0.83 | -0.30 | 2.26  | 3.07  | 5.53  |      |
| -1.66 | -0.50 | -4.10 | -0.82 | -7.10 | -0.41 | -1.17  | -7.21  | -3.35 | -0.04 | 0.43  | 0.40  | -0.79 | -1.03 | 0.42  | 0.39  | 0.06  | -0.37 | -0.70 | 0.16  | 0.21  | 0.00  | 0.41  | -0.12 | -0.63 | 0.79  | 0.62  | -0.62 |      |
| -1.17 | -0.18 | -0.27 | -0.86 | -0.24 | 1.14  | 0.00   | -0.32  | -0.08 | -0.31 | 0.35  | 0.34  | 0.11  | -0.15 | -0.84 | -0.69 | 0.76  | 0.84  | -0.54 | 1.51  | 1.55  | 1.39  | -0.33 | -0.06 | 0.38  | -0.15 | -1.00 | -0.39 |      |
| -0.16 | 2.29  | 1.21  | 2.31  | 2.61  | 0.86  | 2.25   | 1.24   | 0.94  | 0.86  | 0.82  | 0.65  | 1.68  | 0.69  | 1.12  | 0.77  | 2.42  | 0.42  | -0.69 | 0.62  | 1.70  | -0.07 | 0.88  | 0.97  | 2.50  | 1.92  | 1.72  | 1.10  |      |
| -0.26 | -0.83 | -0.05 | -0.30 | -1.09 | -0.65 | -0.17  | 0.17   | -1.66 | -0.05 | -0.03 | -0.22 | -0.43 | 0.11  | -0.46 | -0.63 | -0.91 | 0.10  | -0.75 | -0.54 | -0.39 | -0.29 | -0.48 | -0.68 | -0.74 | -0.60 | -0.14 | 0.18  |      |
| 0.76  | 1.30  | 1.29  | 3.74  | 2.43  | 0.29  | 1.83   | 3.34   | 2.05  | -0.23 | 0.43  | 2.79  | 0.11  | -0.02 | 1.15  | 1.31  | 0.83  | -0.71 | 0.27  | 2.11  | -0.37 | 1.48  | 2.15  | 2.28  | 2.45  | 2.57  | 2.72  | 2.65  |      |
| -1.92 | -1.88 | -2.08 | -0.94 | 0.41  | -0.15 | -1.63  | -1.25  | -2.62 | -0.80 | -0.78 | -1.12 | -0.64 | -0.19 | -1.39 | -1.05 | -0.47 | -0.87 | -1.70 | -1.19 | -0.73 | -0.85 | -1.31 | 0.67  | -1.63 | -0.52 | -0.17 | -0.58 |      |
| -0.89 | -1.88 | -0.52 | -0.57 | -1.00 | -1.02 | -0.06  | 0.08   | -0.39 | -1.26 | -0.84 | -1.14 | -1.47 | -1.27 | -0.58 | -0.79 | -0.36 | -0.81 | -1.18 | -1.30 | -0.76 | -1.41 | -0.68 | -1.75 | -0.33 | -0.78 | -1.54 | -0.50 |      |
| 0.17  | -1.46 | -0.50 | 0.25  | -0.77 | 1.12  | -1.56  | 0.81   | -0.53 | -0.53 | 0.67  | -1.07 | 0.34  | -0.67 | -0.09 | -0.13 | -0.16 | -0.90 | 0.65  | 1.83  | -0.59 | -0.72 | -0.77 | -0.66 | -1.06 | -0.25 | 0.47  | -0.17 |      |
| 1.87  | 3.22  | 0.27  | 1.86  | 2.19  | 0.70  | 2.54   | 1.50   | 1.10  | 2.61  | 1.07  | -0.16 | 0.39  | -0.69 | 0.21  | -1.31 | 0.63  | 1.53  | 0.64  | 1.48  | 0.79  | 1.34  | 0.70  | 0.62  | -0.08 | 1.99  | 2.30  | 0.97  |      |
| 1.11  | 1.27  | 1.72  | 0.94  | 0.95  | 1.13  | 4.04   | 2.33   | 1.55  | 2.41  | 0.27  | -0.21 | 1.19  | 0.34  | 0.51  | 0.86  | 0.89  | -0.08 | 0.26  | 0.01  | 0.45  | 0.54  | 0.92  | 0.82  | 0.60  | 0.73  | 0.57  | 0.64  |      |
| 0.52  | -0.38 | 0.45  | 0.40  | 0.98  | -0.34 | 0.71   | -0.78  | -0.81 | -0.07 | -0.28 | -0.54 | -0.74 | 0.75  | -0.39 | -0.54 | 0.63  | -0.35 | 0.68  | 0.29  | -1.45 | 0.22  | -0.36 | -0.03 | 0.80  | 1.52  | 1.16  | -0.41 |      |
| 0.38  | 1.74  | -0.16 | 1.70  | 0.21  | -0.61 | -1.21  | -1.02  | 0.18  | 0.16  | 1.29  | 3.45  | 2.14  | 1.53  | 1.11  | 4.90  | 0.00  | -1.48 | 0.10  | -0.48 | 0.32  | 0.27  | -0.29 | 0.03  | 0.09  | 0.38  | 2.17  | 1.87  |      |
| 1.93  | 1.21  | -1.42 | 2.82  | -1.56 | -3.03 | -2.27  | -3.40  | 0.20  | -1.61 | 2.85  | 4.43  | 2.54  | 1.88  | 3.17  | 7.22  | -0.22 | 1.32  | -0.12 | -0.76 | 0.30  | 0.18  | -0.86 | -0.55 | -0.51 | 2.46  | 3.50  | 4.00  |      |
| -0.03 | -0.87 | -1.77 | 0.14  | -3.08 | -1.70 | -3.77  | -3.53  | -0.06 | -1.56 | -0.99 | -0.14 | -0.40 | -0.70 | -0.90 | -3.46 | 0.13  | 0.65  | 0.92  | 0.46  | -0.09 | -0.34 | 0.34  | -0.46 | -0.06 | -0.50 | -1.92 | 0.98  |      |
| 0.27  | 3.69  | 0.11  | 2.76  | -3.21 | 0.02  | -4.75  | -2.98  | -0.89 | -2.14 | 0.42  | 0.74  | 2.12  | 0.08  | 1.58  | -0.53 | -0.22 | -0.17 | -0.15 | -0.46 | -0.29 | -0.37 | 0.19  | -1.72 | -0.65 | 0.56  | 0.01  | -0.08 |      |
| 0.12  | 2.76  | 0.62  | 0.67  | -2.96 | -1.27 | -7.77  | -3.99  | -0.97 | -3.72 | 0.73  | 0.96  | 0.04  | 0.99  | 0.43  | 1.11  | -0.24 | -0.46 | 0.23  | -0.62 | -0.50 | 0.79  | 0.11  | 0.33  | -0.30 | 1.08  | 0.17  | 1.26  |      |
| -1.05 | 0.58  | -0.22 | 0.07  | -2.76 | -0.20 | -2.63  | -2.01  | 0.35  | -2.79 | -1.88 | -1.83 | -2.93 | -1.84 | -1.33 | -1.43 | 0.93  | -0.76 | 0.37  | 0.30  | -0.05 | -0.43 | 0.21  | -0.99 | -0.32 | 0.71  | 0.87  | 1.46  |      |
| -0.18 | -0.32 | 0.52  | 0.91  | 0.79  | 0.54  | 0.31   | 0.81   | 0.80  | 1.12  | 1.28  | 0.52  | -0.49 | 0.40  | -0.14 | -0.52 | 1.14  | 0.66  | -0.72 | -1.85 | 0.00  | 0.34  | -0.01 | 0.41  | -0.26 | 0.67  | 1.04  | 0.99  |      |
| -0.05 | 0.40  | 0.49  | 0.32  | -0.49 | 0.05  | 0.47   | -0.13  | -0.79 | 0.28  | 0.26  | -0.72 | 0.83  | -0.75 | 0.25  | -1.53 | -0.33 | -0.78 | 0.25  | -0.24 | -0.30 | -0.73 | -0.39 | 0.45  | 0.23  | -0.41 | 1.22  | -0.19 |      |
| 0.04  | 0.42  | 0.90  | 0.81  | 1.39  | 0.32  | 2.10   | 0.84   | 0.37  | 2.81  | -0.85 | 0.41  | -0.80 | 0.92  | -0.54 | -0.21 | 0.41  | -0.11 | 0.10  | 0.87  | -1.35 | -0.58 | -0.05 | 0.12  | 0.61  | 0.22  | -1.15 | 2.90  |      |
| -7.36 | -4.12 | -0.45 | 0.85  | 0.17  | -0.44 | 0.98   | 2.15   | 1.71  | 0.53  | 0.38  | 2.30  | 0.17  | -0.15 | -0.07 | -0.27 | 1.65  | 0.52  | 0.60  | -1.23 | 0.96  | 0.34  | 1.14  | 0.05  | 0.76  | 0.80  | -1.18 | 0.64  |      |
| 1.03  | 0.21  | 0.89  | 1.54  | -0.14 | 1.25  | 0.87   | 0.50   | 0.66  | 2.14  | 1.15  | 1.88  | 1.01  | 0.70  | 0.46  | 0.59  | 0.56  | 2.14  | 1.23  | 0.05  | 1.14  | 1.35  | 0.60  | 0.46  | 0.72  | 0.97  | 2.27  | 1.88  |      |
| 3.51  | 2.66  | 2.86  | 4.13  | 1.67  | -0.01 | 0.99   | 2.75   | 1.02  | 0.95  | 5.00  | 1.87  | 0.56  | 3.98  | 0.17  | 2.93  | 1.23  | 2.34  | 1.11  | 0.90  | 1.90  | 1.29  | 1.02  | 2.41  | 2.66  | 2.13  | 2.48  | 2.48  |      |
| 0.81  | 1.15  | 1.40  | 0.77  | 0.82  | 0.54  | 0.58   | 1.07   | 0.95  | 0.63  | 2.14  | 1.63  | 0.41  | 0.46  | 2.04  | 0.54  | 1.12  | 0.95  | 2.53  | 0.99  | 1.07  | 0.65  | 0.74  | 1.86  | 0.74  | 0.36  | 0.87  | -0.25 |      |
| 1.03  | 0.30  | 1.51  | 1.03  | 1.42  | 0.41  | 1.50   | 0.70   | 0.54  | 1.80  | 0.45  | 1.47  | 1.30  | 1.25  | -0.11 | 1.22  | 0.90  | 0.62  | 0.84  | 0.58  | 0.71  | 1.15  | 1.00  | 0.98  | 0.81  | 1.28  | 1.81  | 2.57  |      |
| 1.45  | 1.28  | -0.61 | 0.13  | -0.37 | 0.48  | 0.72   | 1.62   | 1.07  | -0.19 | -0.07 | 0.21  | 1.26  | 0.93  | -0.02 | 1.09  | 0.09  | 0.82  | -0.99 | 0.56  | 0.85  | 1.50  | 0.33  | -1.09 | 0.61  | 1.03  | 1.01  | 1.46  |      |
| 0.33  | -0.21 | -0.74 | -0.53 | -1.90 | -2.59 | -2.16  | -1.37  | -0.28 | -0.27 | -0.19 | -0.14 | 0.40  | 0.14  | -0.17 | 0.49  | -0.82 | 0.00  | 0.11  | -0.03 | 0.28  | -0.17 | 0.06  | -0.75 | 0.05  | 0.30  | 0.27  | 0.81  |      |
| 0.29  | -0.20 | 0.09  | 1.45  | 0.61  | -0.06 | 0.10   | 0.60   | 0.18  | 1.57  | -0.10 | 0.82  | 0.46  | -0.13 | 0.36  | -0.54 | 0.42  | -0.26 | -0.03 | -0.16 | 0.27  | 1.65  | 0.41  | 0.30  | -0.04 | 0.03  | 1.99  | 1.22  |      |
| 2.03  | 1.39  | -0.73 | 0.91  | -0.29 | 1.19  | 1.42   | 1.30   | 2.06  | 2.68  | 0.07  | -0.66 | 0.25  | 0.72  | -0.15 | 2.53  | 0.93  | 0.94  | -0.73 | -1.39 | -0.58 | -1.69 | -0.44 | -0.12 | -0.80 | 2.66  | 6.12  | 1.31  |      |
| 1.50  | 1.07  | -0.39 | 1.41  | 0.08  | 1.09  | 2.06   | 1.14   | 0.26  | 0.40  | -0.19 | 0.01  | 0.39  | 0.76  | 0.29  | 0.43  | 2.00  | 1.20  | 1.29  | 0.90  | 0.31  | 0.58  | 0.82  | 1.12  | -0.22 | 1.14  | 2.12  | 1.06  |      |
| 0.65  | 0.07  | 1.41  | 0.96  | 0.74  | 0.37  | 3.24   | 1.47   | 0.03  | 1.65  | -0.23 | 0.47  | -0.03 | -0.33 | -0.50 | 0.65  | 0.27  | 0.15  | -0.54 | -0.31 | 0.56  | 0.23  | 0.19  | -0.25 | -0.12 | 0.51  | 0.79  | 0.79  |      |
| 1.28  | 2.08  | 0.73  | 0.19  | -0.63 | -0.51 | 1.40   | 2.29   | 0.87  | 0.30  | -0.04 | -0.43 | -1.95 | 0.70  | 0.35  | -0.20 | 0.98  | 1.03  | -1.18 | -0.16 | -1.52 | 0.14  | -0.28 | -1.04 | -0.47 | 0.02  | 0.38  | 0.02  |      |



|       |       |       |       |       |       |        |       |       |       |       |       |       |       |       |        |       |       |       |       |       |       |       |       |       |       |       |       |
|-------|-------|-------|-------|-------|-------|--------|-------|-------|-------|-------|-------|-------|-------|-------|--------|-------|-------|-------|-------|-------|-------|-------|-------|-------|-------|-------|-------|
| 1.54  | 0.59  | 0.98  | 1.66  | 1.95  | 0.19  | 1.37   | 0.26  | 0.17  | 1.82  | -0.01 | -0.70 | -0.11 | 0.01  | -0.66 | 0.88   | -0.26 | -0.19 | -0.41 | 0.43  | -1.50 | -0.01 | -0.20 | 1.27  | 0.08  | 0.87  | 1.88  | 0.03  |
| -0.22 | 0.04  | -0.04 | 0.00  | -0.28 | 0.20  | 0.39   | 0.58  | 0.34  | 1.30  | -1.01 | -0.16 | 0.22  | -0.50 | -0.73 | -1.05  | -0.11 | 0.57  | -0.69 | -0.19 | 0.04  | 0.22  | -0.15 | 0.01  | 0.14  | 0.05  | 0.42  | 0.45  |
| -0.04 | 1.46  | 0.66  | 0.32  | 0.23  | -0.36 | 2.16   | 1.71  | 0.35  | 1.49  | 0.93  | -1.05 | -0.66 | -0.28 | -0.87 | -0.89  | -0.26 | -1.37 | -0.26 | -0.45 | -0.83 | 0.50  | -1.56 | -0.60 | 0.07  | 0.94  | 1.01  | 0.75  |
| -0.79 | 0.19  | 0.06  | -0.13 | -0.54 | -1.35 | -4.43  | -2.00 | -0.89 | -0.59 | -0.97 | 0.13  | 0.03  | 0.05  | 0.73  | 0.09   | 1.05  | 0.70  | -0.53 | 0.05  | 0.20  | -0.05 | -0.07 | -0.08 | 0.25  | 1.11  | 1.46  | 1.68  |
| -0.03 | 0.68  | 0.01  | 0.87  | -0.74 | -0.77 | -3.54  | -0.92 | 0.24  | 0.22  | 0.46  | 0.19  | 0.03  | 0.20  | 0.19  | -0.34  | -0.10 | -0.30 | -0.15 | -0.04 | 0.08  | 0.12  | 0.20  | 0.13  | 0.10  | 0.66  | 0.78  | 1.13  |
| 1.35  | 2.83  | 0.03  | 0.57  | -1.26 | -2.45 | -7.67  | -0.41 | 0.60  | -2.65 | -0.12 | 0.72  | 0.40  | -0.09 | -0.48 | 0.26   | 0.62  | -0.49 | -1.80 | -0.77 | 0.33  | -0.37 | -0.06 | -1.69 | 0.91  | -0.39 | 0.87  | -0.22 |
| 0.90  | 0.81  | -0.13 | -0.92 | 0.74  | -0.05 | -1.06  | 1.38  | -0.40 | 0.79  | 0.12  | 0.14  | -0.57 | -0.51 | -1.25 | 0.79   | 0.55  | 0.30  | 0.47  | -0.28 | -0.92 | 0.70  | 1.30  | 1.21  | 0.12  | 0.64  | -0.34 | 1.52  |
| 0.18  | 0.89  | 1.44  | 2.16  | 0.72  | 2.01  | 3.50   | 1.52  | 0.64  | 1.38  | -0.83 | -0.21 | 0.35  | -0.76 | 0.68  | -0.56  | 0.86  | 0.46  | 0.13  | 0.90  | 0.77  | 0.31  | 0.10  | 0.01  | -0.01 | 0.30  | 2.00  | 0.73  |
| 1.68  | 0.66  | 2.46  | 2.43  | 0.88  | 3.50  | 3.71   | 3.96  | 0.99  | 2.99  | 1.23  | -0.68 | -0.25 | 1.53  | 0.53  | 2.65   | -0.99 | 0.34  | 1.21  | 1.19  | 0.19  | 1.06  | 2.31  | 2.01  | -0.08 | 1.23  | 1.37  | 1.94  |
| 1.23  | -0.98 | -3.32 | -1.42 | -0.62 | 1.95  | -2.95  | 1.90  | 1.54  | 4.00  | 9.79  | 15.03 | 13.44 | 8.73  | 6.19  | 15.91  | 2.24  | -0.26 | -0.61 | -0.50 | 0.21  | -0.59 | 4.40  | 2.14  | 1.21  | 0.61  | 2.95  | 4.05  |
| -0.17 | -2.73 | -8.70 | -1.90 | -1.66 | -1.68 | -10.79 | 2.39  | 2.01  | 1.84  | 13.34 | 20.30 | 19.52 | 16.57 | 11.17 | 24.94  | 0.28  | -0.91 | 1.17  | 1.91  | -0.26 | 3.22  | 11.14 | 2.85  | 1.28  | 3.02  | 0.93  | 4.63  |
| -2.92 | -1.24 | -5.26 | -2.04 | 0.98  | -1.03 | -5.66  | 4.48  | -1.00 | 4.21  | -6.79 | -7.19 | -6.10 | -7.14 | -8.64 | -9.48  | 2.19  | 0.04  | 0.13  | 1.31  | 0.04  | 0.39  | 7.50  | 0.78  | 0.50  | -0.05 | 0.26  | -0.51 |
| 0.96  | -0.46 | -1.86 | 3.39  | -8.50 | -6.52 | -12.14 | -9.44 | -0.17 | -4.37 | 8.42  | 10.61 | 10.41 | 13.10 | 6.88  | 6.36   | 1.33  | -0.24 | -0.55 | -1.40 | -0.12 | 1.33  | 0.24  | -0.17 | -0.37 | 4.71  | 3.93  | 8.47  |
| -1.04 | 0.07  | -4.96 | 0.02  | -8.86 | -0.27 | -0.92  | -8.33 | -3.07 | -0.20 | 1.88  | 0.98  | -0.05 | -0.58 | 0.27  | 0.75   | -0.34 | 0.95  | -0.38 | -0.20 | 0.51  | 0.49  | 0.33  | -0.26 | -0.45 | 0.59  | 0.35  | 0.85  |
| -0.71 | -0.43 | -0.92 | -0.99 | -0.30 | 0.27  | 0.08   | -0.37 | 0.25  | -0.52 | -0.23 | 0.29  | 0.80  | -0.71 | -0.25 | -0.71  | 0.89  | 1.22  | -0.72 | 1.02  | 1.76  | 1.27  | -0.01 | 1.36  | 2.26  | -0.11 | -0.22 | 0.37  |
| 1.33  | 1.89  | 1.82  | 2.61  | 2.67  | 0.84  | 3.19   | 1.99  | 0.99  | 1.70  | 0.91  | 0.91  | 1.33  | 0.04  | 0.74  | 1.20   | 1.24  | 0.23  | -0.78 | 0.64  | 1.94  | 0.08  | 2.50  | 1.81  | 2.46  | 1.62  | 2.54  | 1.45  |
| -0.74 | -1.15 | -0.32 | 1.00  | -0.77 | -1.44 | -1.79  | -2.04 | -1.54 | 0.54  | -0.19 | 0.10  | -1.10 | -0.22 | -0.38 | -0.69  | -0.57 | -0.38 | -0.40 | -0.83 | -0.74 | 0.09  | -0.60 | -1.16 | -1.42 | -1.03 | 0.46  | 0.39  |
| 1.56  | 2.68  | 1.67  | 2.66  | 2.34  | 1.47  | 0.33   | 0.31  | 1.78  | 0.84  | 1.70  | 2.62  | 1.49  | 0.40  | 0.17  | 1.31   | 1.06  | -0.59 | 0.95  | 1.11  | 0.71  | 1.54  | 2.07  | 0.44  | 1.52  | 2.23  | 3.33  | 3.64  |
| -3.26 | -2.26 | -1.86 | -0.63 | 0.34  | -2.14 | -3.23  | -1.75 | -1.98 | -0.50 | -1.01 | -0.38 | -0.96 | -0.66 | -0.76 | 0.14   | -1.33 | -1.27 | -1.84 | -1.93 | -1.22 | -0.88 | -1.44 | -1.21 | -1.34 | -1.41 | -1.72 | -2.18 |
| -1.37 | -3.14 | -1.24 | -0.37 | -0.37 | -0.37 | -0.51  | 0.16  | -0.32 | -1.01 | -1.25 | -1.11 | -0.80 | -0.02 | -1.26 | -1.47  | -0.18 | -1.06 | -1.56 | -1.68 | -0.36 | -1.32 | -1.64 | -1.32 | -1.32 | -1.14 | -1.59 | -0.30 |
| -0.45 | -0.11 | 0.42  | -0.06 | 0.44  | -0.74 | -0.55  | 0.37  | -0.04 | -0.72 | 0.19  | 0.00  | 0.58  | -0.02 | -0.75 | 0.14   | -0.31 | -0.83 | 0.54  | 0.86  | -0.65 | -1.72 | -1.04 | -0.09 | -1.41 | -1.21 | -1.00 | -1.09 |
| 2.44  | 3.23  | 1.07  | 1.41  | 3.49  | -0.11 | 4.33   | 1.75  | 1.37  | 2.26  | 0.35  | -0.48 | 0.16  | -0.34 | 0.25  | -0.16  | 1.22  | 0.26  | 1.85  | 1.35  | 0.65  | 1.93  | 1.81  | 0.95  | -0.25 | 1.10  | 2.92  | 1.26  |
| 0.95  | 1.88  | 2.90  | 2.07  | 1.63  | 2.38  | 5.68   | 2.96  | 1.99  | 4.10  | 0.11  | 0.09  | 0.82  | 0.50  | -0.46 | 0.21   | 1.27  | 0.26  | 0.52  | -0.20 | 0.68  | 0.93  | 1.04  | 1.42  | 0.66  | 1.15  | 0.83  | 0.74  |
| 0.46  | -0.14 | -0.51 | 0.30  | 2.66  | 0.51  | -0.56  | -0.30 | -0.06 | -0.81 | 0.14  | 0.83  | 0.68  | 0.27  | 0.60  | -0.11  | 0.82  | -1.62 | 0.52  | 0.01  | -1.00 | -0.25 | -0.61 | 0.39  | 0.37  | 1.37  | -1.17 | 1.93  |
| 1.19  | 2.16  | 0.30  | 4.50  | -0.24 | 0.33  | -0.98  | 0.34  | 1.29  | 0.54  | 4.33  | 8.34  | 2.91  | 5.07  | 3.76  | 10.63  | -0.56 | -2.39 | -0.86 | -3.00 | -0.46 | 0.34  | -1.88 | -0.83 | -0.43 | 1.63  | 3.32  | 4.59  |
| 2.81  | 1.95  | -0.66 | 4.21  | -0.02 | -3.64 | -2.80  | -3.26 | 1.86  | -1.33 | 7.51  | 11.89 | 6.54  | 6.58  | 7.08  | 16.19  | 0.30  | 0.59  | -0.09 | 0.08  | 0.47  | 0.30  | -0.50 | -0.28 | -0.29 | 3.60  | 5.87  | 7.23  |
| -0.04 | 0.09  | -1.78 | -0.39 | -4.35 | -2.32 | -4.67  | -3.81 | -0.36 | -1.63 | -3.02 | -4.52 | -2.72 | -4.45 | -3.40 | -6.80  | 0.73  | 0.88  | 0.80  | 1.42  | 0.14  | -0.48 | 0.94  | -0.68 | 0.40  | -0.77 | -4.22 | -1.93 |
| 0.95  | 1.23  | 0.06  | 2.19  | -2.93 | -1.30 | -5.86  | -2.00 | -1.00 | -3.28 | 1.23  | 2.50  | 1.48  | 1.59  | 1.32  | 0.00   | -0.70 | -1.06 | -0.46 | -2.21 | -0.24 | -0.45 | 0.50  | -1.77 | 0.25  | 0.31  | 0.49  | 0.33  |
| 0.41  | 0.33  | 0.26  | 0.94  | -3.11 | -2.70 | -9.49  | -5.68 | -0.72 | -4.49 | 1.62  | 4.38  | 2.56  | 1.19  | 1.59  | 3.33   | -0.34 | -0.84 | 0.65  | -1.23 | -0.83 | 1.13  | -0.08 | -0.09 | -0.27 | 0.29  | 0.75  | 0.52  |
| -1.79 | -1.71 | -1.05 | 0.28  | -2.98 | -2.22 | -3.89  | -3.44 | 0.51  | -3.33 | -2.81 | -4.43 | -5.10 | -5.35 | -3.81 | -5.44  | 1.60  | 0.15  | 0.85  | 0.52  | 0.32  | -1.65 | 1.18  | -0.63 | -0.21 | -1.21 | -0.12 | 0.14  |
| -0.27 | 1.96  | 1.50  | 1.05  | 2.22  | 1.94  | 0.68   | 0.76  | 0.57  | 1.98  | 0.93  | 0.49  | -0.69 | -0.24 | 0.76  | -0.04  | 1.11  | 0.67  | -0.66 | -1.09 | 0.18  | 0.23  | -0.34 | 0.26  | 0.55  | 0.26  | 0.94  | 2.05  |
| -0.09 | 0.63  | 0.08  | 0.85  | -0.82 | 0.13  | -0.17  | 0.14  | -0.80 | 0.51  | -0.13 | 0.03  | 0.23  | -0.52 | -0.88 | -1.14  | 0.42  | -0.40 | 0.20  | 0.03  | -0.32 | 0.35  | 0.02  | -0.39 | -0.08 | -0.69 | 0.46  | 0.04  |
| 1.24  | -0.36 | 0.46  | 0.76  | 1.37  | 1.44  | 2.33   | 1.10  | 1.98  | 2.89  | -0.77 | 0.19  | -0.04 | -0.23 | -0.82 | 0.21   | 0.48  | 0.49  | -0.85 | 0.24  | -1.36 | -0.66 | 0.63  | 0.04  | 0.03  | 0.25  | -0.34 | 3.73  |
| -9.32 | -5.03 | -0.92 | 1.68  | 0.71  | -0.13 | 0.39   | 2.44  | 0.85  | 1.13  | -0.30 | 2.19  | 1.52  | 0.15  | 1.15  | 1.17   | 1.08  | -0.25 | 0.68  | -0.16 | 0.59  | 0.53  | 0.91  | 1.64  | 1.40  | -0.83 | 1.62  | 0.89  |
| 1.23  | -0.28 | 1.94  | 1.94  | 0.71  | 1.13  | 0.85   | 0.94  | 1.17  | 0.59  | 1.40  | 2.78  | 1.26  | 1.06  | 1.19  | 1.07   | 0.63  | 1.91  | 1.26  | -0.02 | 0.99  | 1.44  | 0.95  | 0.57  | 0.76  | 1.17  | 3.32  | 2.44  |
| 5.26  | 3.78  | 2.07  | 4.08  | 1.42  | 1.86  | 2.53   | 1.88  | 0.91  | 1.27  | 2.52  | 3.03  | 1.74  | 3.62  | 1.33  | 2.61   | 1.91  | 2.90  | 2.45  | 0.45  | 2.15  | 2.12  | 1.41  | 1.32  | 1.78  | 2.10  | 2.06  | 1.79  |
| 0.92  | 0.64  | 1.88  | 1.87  | 1.37  | 1.57  | 1.35   | 1.61  | 1.73  | 1.79  | 1.77  | 0.17  | 0.55  | 0.29  | 2.22  | 0.42   | 1.54  | 1.32  | 1.81  | 0.75  | 1.34  | 0.66  | 0.33  | 1.90  | 1.59  | 1.13  | 2.26  | 1.34  |
| 1.24  | 0.63  | 1.54  | 1.15  | 1.70  | 0.88  | 1.62   | 1.10  | 1.25  | 2.01  | 1.14  | 2.09  | 1.37  | 1.39  | 0.30  | 1.35   | 1.08  | 0.77  | 0.65  | 1.14  | 0.44  | 0.59  | 1.05  | 1.01  | 0.56  | 0.63  | 1.32  | 2.29  |
| 1.07  | 1.45  | 0.45  | 0.66  | 0.74  | 1.09  | 0.41   | 1.48  | 1.77  | 1.04  | 0.73  | 0.11  | 0.30  | -0.65 | 0.33  | 1.16   | 1.00  | 1.83  | -0.66 | -0.31 | 2.15  | 1.45  | 0.34  | 0.17  | 0.81  | 1.12  | 1.29  | 1.87  |
| -0.81 | -0.73 | 0.12  | 0.19  | -0.84 | -2.33 | -3.91  | -1.14 | -0.34 | 0.63  | -0.88 | -0.83 | 1.01  | -0.18 | 0.03  | 0.20   | 0.72  | -0.56 | -0.19 | 0.18  | 0.45  | -0.12 | 0.72  | -0.21 | -0.27 | 0.94  | -0.07 | 0.59  |
| -0.12 | 0.47  | 0.47  | 2.52  | 0.12  | -0.13 | -0.32  | 0.63  | -0.50 | 2.14  | 0.38  | 0.46  | -1.54 | -0.52 | 0.13  | -0.74  | 0.85  | -0.08 | 0.20  | 0.11  | 0.07  | 0.26  | 0.12  | -0.06 | 0.17  | -0.28 | 1.63  | 0.86  |
| 2.45  | 1.55  | 1.79  | 1.57  | 0.53  | 1.37  | 1.73   | 3.66  | 2.04  | 1.39  | 0.55  | 0.26  | 2.21  | 1.14  | 0.10  | 1.16   | -0.21 | -0.05 | -1.29 | -1.03 | 0.37  | 0.24  | 0.01  | -0.83 | -0.39 | 2.40  | 0.08  | 1.22  |
| 1.34  | 1.34  | -0.47 | 2.34  | 0.96  | 1.48  | 2.95   | 2.20  | -0.70 | 0.81  | -0.37 | -1.45 | -0.05 | -1.10 | -1.06 | -1.69  | 2.20  | 0.99  | 1.14  | 2.13  | 0.31  | 1.63  | 1.28  | 1.88  | 0.49  | 0.87  | 2.77  | 0.55  |
| 1.02  | 0.01  | 1.69  | 1.46  | 1.22  | 0.62  | 4.39   | 2.34  | 0.07  | 1.63  | 0.19  | 1.40  | 0.29  | 0.54  | 0.14  | 1.28   | 0.51  | -0.43 | -0.15 | -0.63 | 0.58  | 0.08  | 0.45  | -0.38 | -0.24 | -1.12 | 0.04  | 0.47  |
| 0.80  | 1.32  | 1.01  | -0.13 | 0.76  | 0.53  | 1.64   | 0.00  | 0.65  | 0.31  | 0.41  | 0.13  | 0.68  | 0.20  | -0.14 | 0.33   | 0.96  | 0.57  | -0.46 | -0.21 | -1.26 | 0.33  | -0.35 | 0.14  | -0.68 | -0.27 | 0.23  | -0.09 |
| 0.93  | -0.27 | 1.11  | 1.22  | -2.30 | -4.30 | -6.54  | -5.06 | 0.82  | -2.31 | 1.27  | 3.14  | 2.97  | 4.43  | 2.00  | 5.00   | -0.10 | -1.17 | 0.25  | -1.10 | -0.13 | -1.02 | 1.96  | -1.24 | 0.01  | -0.35 | 0.97  | 0.31  |
| 0.57  | 0.56  | 0.91  | 2.20  | -1.46 | -5.21 | -9.08  | -3.84 | 1.59  | -4.43 | 1.70  | 2.80  | 3.31  | 3.79  | 1.97  | 5.62   | -0.28 | -0.80 | -0.09 | -0.83 | -0.90 | -0.38 | 0.35  | -1.18 | -0.28 | 0.99  | 0.62  | -0.26 |
| -1.59 | -1.01 | -0.66 | 1.12  | -3.87 | -5.17 | -8.13  | -7.33 | -1.10 | -2.83 | -4.81 | -7.62 | -4.12 | -5.43 | -4.37 | -10.48 | 0.93  | -0.06 | 1.09  | 0.17  | 3.02  | 0.71  | 1.63  | -0.67 | -0.54 | -0.57 | 0.52  | -2    |

|        |       |       |       |       |       |        |        |       |       |        |        |        |        |        |        |       |       |       |       |       |       |       |       |       |       |       |       |      |
|--------|-------|-------|-------|-------|-------|--------|--------|-------|-------|--------|--------|--------|--------|--------|--------|-------|-------|-------|-------|-------|-------|-------|-------|-------|-------|-------|-------|------|
| -1.06  | 0.89  | 0.10  | 1.66  | -1.25 | -1.79 | -4.10  | -2.19  | -0.65 | -0.08 | -0.19  | -0.59  | 0.05   | -1.14  | 0.56   | 0.04   | 0.23  | 0.70  | -0.97 | 0.30  | -0.42 | -0.82 | 0.11  | 0.08  | -0.12 | -0.02 | 1.53  | 1.40  |      |
| 0.82   | 0.83  | -0.50 | 1.14  | -0.14 | 0.30  | -2.87  | -0.29  | 0.32  | 0.32  | 0.21   | 0.67   | 0.23   | 0.79   | -0.11  | -0.55  | 0.08  | -0.59 | 0.08  | 0.12  | -0.64 | 0.98  | 0.26  | -0.36 | -0.21 | 1.83  | 0.77  | 1.15  |      |
| 0.95   | 3.21  | -0.88 | 0.98  | -1.94 | -3.75 | -7.83  | -1.88  | 0.41  | -1.49 | 0.77   | 0.92   | 0.51   | 0.61   | 0.14   | 0.60   | 1.77  | -0.23 | -1.67 | -1.21 | 0.27  | 0.46  | 0.16  | -0.31 | -0.13 | -0.38 | 1.14  | -0.42 |      |
| 1.59   | 0.58  | -0.10 | -0.99 | -0.99 | -0.76 | -0.36  | -1.06  | -0.26 | 0.46  | 0.98   | 0.27   | -0.50  | -0.03  | -0.61  | -1.25  | 0.58  | -0.07 | 0.23  | -1.45 | 0.07  | -1.51 | 0.92  | 0.43  | 0.22  | 0.38  | 2.04  | 2.25  |      |
| -0.10  | 0.94  | 1.32  | 2.34  | 1.72  | 1.39  | 3.01   | 2.10   | 1.21  | 1.66  | -1.57  | -0.04  | -0.20  | -1.48  | -0.06  | -1.16  | 1.01  | 1.14  | 1.44  | 0.36  | 0.70  | 0.97  | 0.48  | 0.52  | 0.22  | 0.51  | 1.82  | 2.00  |      |
| 1.67   | 0.98  | 2.33  | 2.01  | 0.48  | 2.76  | 3.47   | 4.38   | 0.78  | 3.24  | 1.76   | -0.91  | 0.19   | 1.43   | -0.78  | 1.34   | -1.38 | 0.45  | 1.18  | 0.93  | 0.10  | 1.45  | 2.32  | 2.54  | 0.21  | 2.96  | 0.43  | 2.75  |      |
| 2.29   | 0.50  | -1.45 | 1.25  | 4.05  | 3.70  | -1.60  | -6.89  | 3.65  | 3.14  | 18.72  | 27.61  | 21.19  | 15.29  | 12.82  | 24.99  | 2.32  | -0.04 | 1.08  | 1.35  | 0.42  | 2.31  | 3.21  | 2.52  | 3.86  | 2.22  | 3.03  | 6.48  |      |
| 2.97   | 1.10  | -6.97 | 3.61  | 4.41  | 0.64  | -9.95  | -11.08 | 5.81  | 7.57  | 31.02  | 45.65  | 36.22  | 34.81  | 24.70  | 44.61  | 5.32  | 1.18  | 3.79  | 5.59  | 1.39  | 4.90  | 8.71  | 4.93  | 4.31  | 5.54  | 3.53  | 8.86  |      |
| -4.65  | -0.72 | -6.11 | -0.34 | 3.26  | -4.28 | -7.91  | 2.22   | -3.20 | 3.92  | -12.36 | -14.23 | -12.78 | -14.28 | -13.63 | -13.99 | -0.58 | -0.72 | -0.54 | -0.97 | -0.47 | -0.60 | 1.35  | 0.12  | -0.37 | 0.11  | -1.04 | -1.76 |      |
| 2.40   | 1.23  | 0.52  | 5.79  | -3.79 | -3.82 | -9.53  | -5.74  | 2.92  | 4.04  | 14.69  | 15.29  | 17.24  | 20.26  | 11.13  | 8.69   | 1.63  | 0.52  | 0.56  | 0.34  | 0.29  | 2.55  | 0.90  | 0.60  | 1.14  | 7.48  | 5.60  | 12.37 |      |
| -0.92  | 0.43  | -5.17 | 0.14  | -8.67 | -0.48 | -0.55  | -4.78  | -3.39 | 1.02  | 1.14   | 1.27   | 0.34   | 0.07   | 0.10   | 0.49   | 0.25  | 0.25  | 0.09  | -0.83 | -0.19 | 1.27  | 1.09  | -0.35 | -0.50 | 0.83  | 0.91  | 1.98  |      |
| -0.87  | -1.04 | -0.24 | -0.79 | 0.19  | 0.31  | -0.38  | -0.31  | 0.72  | -1.16 | 0.56   | -0.05  | -0.10  | -0.68  | -0.27  | -1.59  | 1.29  | 1.06  | -0.44 | 0.56  | 2.10  | 0.97  | 1.15  | 1.32  | -0.03 | 0.15  | -1.42 | 0.19  |      |
| 1.34   | 3.45  | 1.49  | 2.54  | 2.62  | 1.53  | 2.47   | 2.61   | 1.68  | 4.06  | 1.32   | -0.06  | 1.36   | -0.41  | 0.90   | 1.11   | 1.47  | 0.40  | -0.58 | 1.58  | 1.86  | 0.44  | 1.82  | 1.96  | 2.93  | 1.39  | 3.63  | 2.26  |      |
| -1.05  | -1.38 | -0.62 | -0.48 | -0.08 | -0.99 | -0.92  | -0.48  | -1.26 | 0.32  | -0.28  | 0.71   | -1.13  | -0.76  | -0.65  | -0.88  | -0.13 | 0.14  | -0.52 | -1.56 | -1.37 | -0.01 | -0.58 | -0.77 | -1.07 | -0.15 | -0.33 | -0.14 |      |
| 3.08   | 3.39  | 2.20  | 2.03  | 4.13  | 0.91  | 2.27   | 1.40   | 3.47  | 1.79  | 0.77   | 1.62   | 0.00   | -0.20  | -0.04  | 0.95   | 1.75  | -0.02 | 1.84  | 2.17  | 1.22  | 1.63  | 1.92  | -0.04 | 2.43  | 2.14  | 2.90  | 3.76  |      |
| -2.72  | -2.88 | -2.86 | -1.77 | -0.16 | -2.15 | -3.45  | -0.77  | -1.98 | -0.23 | -0.62  | 2.03   | -0.37  | 0.31   | -0.12  | 1.05   | -1.53 | -1.81 | -1.65 | -1.78 | -1.17 | -1.87 | -1.58 | -1.72 | -2.22 | -1.06 | -1.76 | -1.86 |      |
| -1.76  | -3.20 | -1.57 | 0.12  | -0.79 | -0.68 | -0.28  | 0.18   | 0.05  | 0.61  | -0.28  | 0.13   | -0.21  | 0.34   | -0.28  | -0.77  | -0.84 | -1.32 | -1.21 | -2.16 | -1.10 | -1.37 | -1.53 | -1.89 | -1.98 | -1.18 | -1.98 | -1.03 |      |
| -0.90  | -0.79 | 0.62  | 0.63  | -0.12 | 0.66  | -1.95  | 0.07   | 0.19  | 1.23  | -0.36  | 0.23   | 0.90   | 0.86   | -0.12  | 0.31   | -0.67 | -1.15 | 0.74  | 1.74  | -0.16 | -0.17 | -0.63 | -1.35 | -2.30 | -0.04 | 0.04  | 0.23  |      |
| 3.20   | 4.17  | -0.10 | 3.23  | 4.48  | 1.71  | 3.78   | 2.10   | 0.89  | 3.53  | 0.54   | -0.06  | 0.63   | 0.21   | 0.28   | -0.88  | 1.37  | 2.35  | 1.59  | 2.30  | 1.16  | 1.73  | 2.02  | 0.84  | 0.64  | 3.65  | 3.60  | 1.75  |      |
| 1.62   | 1.86  | 3.26  | 2.23  | 1.65  | 2.11  | 6.32   | 3.32   | 2.29  | 3.35  | -0.38  | -0.88  | 0.34   | -0.31  | -0.45  | -0.60  | 1.55  | 0.65  | 0.72  | -0.15 | 0.74  | 1.63  | 1.21  | 1.12  | 0.42  | 1.00  | 1.57  | 0.81  |      |
| 0.98   | 1.46  | -0.40 | 0.03  | 3.77  | -0.96 | -0.15  | -1.05  | 0.92  | 1.32  | 0.15   | 0.05   | 1.15   | 1.39   | 0.58   | -1.21  | 0.79  | -0.77 | 0.05  | 0.45  | -0.47 | -1.78 | -0.60 | 0.67  | 0.12  | 1.50  | 0.02  | 0.32  |      |
| 3.20   | 3.84  | 1.63  | 6.91  | 1.23  | 1.57  | -0.77  | 0.76   | 2.78  | 1.39  | 11.31  | 16.19  | 8.60   | 8.33   | 8.48   | 15.56  | 1.71  | -2.67 | -0.68 | -0.51 | -1.24 | 0.99  | 0.03  | 0.19  | 1.79  | 4.09  | 8.36  | 9.98  | 6.92 |
| 3.80   | 2.75  | 0.08  | 7.70  | 1.29  | -3.53 | -2.85  | -2.49  | 4.04  | -0.39 | 16.48  | 23.65  | 14.30  | 14.66  | 14.57  | 25.33  | 1.34  | 0.32  | 0.22  | -0.16 | 0.62  | 1.77  | 1.20  | 0.64  | 1.94  | 6.44  | 10.12 | 11.09 |      |
| 0.08   | -0.10 | -2.33 | -2.43 | -4.73 | -4.33 | -5.03  | -4.47  | -2.05 | -3.42 | -7.84  | -8.39  | -6.00  | -6.50  | -5.10  | -10.03 | 0.14  | 1.06  | 1.38  | 1.39  | 0.71  | -1.42 | 0.40  | -0.80 | -0.50 | -2.26 | -5.48 | -2.92 |      |
| 0.91   | 2.48  | -0.34 | 3.52  | -3.99 | -0.94 | -6.69  | -4.26  | -1.23 | -2.10 | 1.91   | 4.94   | 2.69   | 0.85   | 2.00   | 2.10   | -1.14 | -1.42 | -0.28 | -1.74 | -0.63 | -0.07 | 0.61  | -0.40 | -0.82 | 0.70  | 0.22  | 0.58  |      |
| 0.58   | 1.19  | -0.27 | 1.17  | -3.58 | -1.92 | -10.55 | -6.41  | -0.47 | -5.53 | 3.25   | 8.32   | 4.75   | 3.16   | 3.91   | 6.43   | 0.39  | -0.71 | 1.05  | -1.90 | -0.71 | 1.03  | 0.66  | -0.43 | 0.22  | 0.58  | 1.36  | 1.42  |      |
| -1.22  | -1.45 | -1.01 | -0.19 | -3.30 | -1.94 | -5.32  | -4.37  | -1.03 | -3.54 | -9.00  | -11.90 | -11.19 | -9.89  | -8.57  | -14.52 | -0.37 | 0.06  | 0.47  | 0.47  | -0.87 | -1.52 | -0.36 | -0.32 | -1.73 | -0.52 | -0.06 | 0.94  |      |
| 0.26   | 1.50  | 1.49  | 2.57  | 1.77  | 1.87  | 0.89   | 0.99   | 1.48  | 3.23  | 1.15   | 0.98   | 0.09   | 0.48   | 0.23   | -0.98  | 1.56  | 0.53  | -0.34 | -0.50 | 0.49  | 0.90  | 0.18  | 0.13  | 0.08  | -0.04 | 1.46  | 1.08  |      |
| -0.41  | 0.47  | 0.56  | -0.27 | -0.20 | -0.31 | -0.32  | -0.19  | -0.94 | 0.28  | -1.08  | -0.35  | 0.21   | -1.38  | -0.29  | 0.68   | 0.11  | -0.49 | 0.01  | -0.35 | -0.69 | -1.08 | 0.11  | -0.52 | 0.02  | 0.13  | 0.93  | 0.50  |      |
| 0.38   | 1.43  | 0.12  | 2.74  | 1.54  | 1.80  | 1.79   | 3.43   | 1.47  | 3.57  | -0.41  | 0.86   | 0.16   | 0.72   | -0.43  | 0.53   | 0.61  | 0.81  | 0.28  | -0.44 | -0.68 | -0.54 | 0.01  | -0.22 | 0.03  | 1.54  | 0.80  | 4.92  |      |
| -12.18 | -5.85 | -1.01 | 2.18  | 0.64  | 1.12  | 0.86   | 3.00   | 1.92  | 2.46  | 1.71   | 2.87   | 1.41   | 0.50   | 1.10   | 0.95   | 1.61  | 0.65  | 0.15  | 0.15  | 0.86  | 0.86  | 1.53  | 1.33  | 0.68  | 1.18  | 2.72  | 2.12  |      |
| 1.36   | 0.29  | 2.01  | 1.77  | 1.90  | 1.01  | 1.77   | 1.39   | 0.64  | 3.19  | 1.18   | 2.11   | 0.88   | 0.83   | 1.02   | 1.03   | 0.45  | 2.56  | 1.75  | 0.31  | 1.11  | 1.88  | 1.05  | 1.23  | 1.83  | 1.38  | 2.46  | 1.92  |      |
| 6.34   | 4.08  | 1.87  | 4.36  | 0.62  | 2.09  | 2.93   | 3.16   | 0.72  | 2.81  | 2.88   | 4.75   | 1.80   | 4.68   | 1.12   | 2.98   | 2.64  | 2.41  | 2.68  | 1.16  | 3.40  | 3.62  | 3.19  | 1.82  | 3.41  | 1.37  | 2.43  | 2.40  |      |
| 0.97   | 1.74  | 1.57  | 1.46  | 2.15  | 0.96  | 1.41   | 1.58   | 2.39  | 2.32  | 1.80   | 1.00   | 0.88   | 0.54   | 0.57   | 0.49   | 1.99  | 1.80  | 2.35  | 1.49  | 1.73  | 1.25  | 1.49  | 2.97  | 1.39  | 2.57  | 2.01  | 0.14  |      |
| 1.43   | 1.06  | 1.47  | 1.69  | 1.47  | 1.16  | 2.54   | 1.45   | 1.30  | 2.76  | 1.29   | 1.26   | 1.22   | 1.10   | 0.72   | 1.05   | 1.61  | 0.83  | 0.88  | 1.25  | 0.51  | 0.93  | 1.41  | 1.62  | 0.80  | 0.94  | 2.09  | 3.08  |      |
| 1.08   | 1.06  | 0.49  | 0.70  | 0.52  | 0.89  | 0.07   | 2.12   | 0.48  | 1.29  | 0.45   | -0.22  | 0.29   | 1.57   | 0.83   | 1.03   | 1.13  | 1.78  | -0.32 | 0.20  | 0.58  | 1.70  | 0.39  | 0.02  | 0.66  | 1.96  | 2.64  | 1.46  |      |
| -0.97  | -0.39 | -1.24 | 0.50  | -1.54 | -2.42 | -2.79  | -1.38  | -0.86 | -0.57 | -0.86  | -0.74  | 0.88   | -0.57  | 0.06   | -0.19  | 0.76  | -0.36 | 0.44  | -0.15 | 0.32  | 0.34  | 0.84  | 0.09  | -0.26 | 0.76  | -0.24 | 1.16  |      |
| 0.79   | 1.01  | -0.72 | 2.23  | 0.03  | 0.54  | -0.70  | 0.38   | -0.77 | 1.11  | -0.24  | -0.15  | -1.77  | -1.82  | -0.96  | -2.37  | 0.70  | -0.53 | 0.42  | 0.09  | -0.16 | 1.02  | -0.09 | -0.13 | -0.46 | 0.12  | 2.02  | -0.34 |      |
| 2.12   | 0.85  | 0.99  | 1.46  | 1.41  | 2.71  | 3.77   | 3.88   | 2.24  | 2.05  | 0.74   | 0.56   | 2.77   | 0.43   | 1.50   | 1.24   | 0.04  | 0.12  | -1.43 | -0.47 | 1.15  | -1.13 | -0.27 | -0.52 | -1.06 | 2.69  | 0.02  | 2.42  |      |
| 2.59   | 1.52  | -0.18 | 2.03  | 0.92  | 1.60  | 2.76   | 0.17   | -1.09 | 0.03  | -2.63  | -4.26  | -2.92  | -2.88  | -0.99  | -2.86  | 2.54  | 1.35  | 1.16  | 2.32  | 0.24  | 1.50  | 1.83  | 1.94  | 0.28  | 0.49  | 3.01  | 1.42  |      |
| 1.01   | 0.55  | 1.29  | 1.51  | 1.87  | 2.33  | 4.48   | 3.87   | 0.72  | 2.44  | 4.07   | 2.09   | 0.78   | 0.58   | 0.18   | 0.97   | 0.31  | 0.06  | 0.32  | -0.97 | 0.39  | 0.11  | 1.04  | -0.26 | -0.03 | 0.22  | 0.78  | 1.79  |      |
| 1.08   | 0.67  | -0.30 | 0.26  | -1.01 | 0.36  | 0.70   | -0.56  | 0.37  | 1.16  | -0.04  | 0.81   | 1.14   | -0.56  | 0.19   | 0.94   | 0.50  | 0.36  | 1.14  | -0.08 | -1.56 | 0.37  | 0.48  | -0.41 | 0.44  | 0.80  | 0.46  | 0.61  |      |
| 0.56   | -0.13 | 0.36  | 2.47  | -2.45 | -5.73 | -7.29  | -4.78  | 1.57  | -3.00 | 4.28   | 7.81   | 5.61   | 6.92   | 4.78   | 9.16   | -0.17 | -1.13 | 0.07  | -0.67 | -0.21 | 0.34  | 1.34  | -1.68 | -0.29 | 0.10  | 0.63  | 0.77  |      |
| 2.65   | 1.15  | 1.01  | 1.96  | -2.05 | -5.54 | -9.00  | -3.38  | 1.31  | -4.63 | 4.04   | 7.88   | 6.34   | 6.15   | 3.88   | 9.03   | -1.03 | -0.80 | 0.21  | -0.77 | -1.10 | -1.17 | 0.98  | -1.11 | 0.24  | 1.07  | 1.30  | 0.18  |      |
| -0.86  | -0.76 | -2.07 | 2.52  | -6.33 | -7.64 | -9.31  | -8.38  | -3.08 | -4.28 | -11.99 | -20.90 | -11.42 | -13.38 | -12.19 | -21.96 | 0.28  | -1.32 | 1.21  | -1.11 | 2.31  | 0.52  | 1.99  | -1.90 | -1.10 | 0.31  | -0.45 | -3.86 |      |
| 1.80   | 2.78  | 2.44  | 1.97  | 2.13  | 0.72  | 2.79   | 3.57   | 2.58  | 1.90  | -8.20  | -9.53  | -8.29  | -7.54  | -5.90  | -11.36 | 0.17  | -1.23 | -1.97 | 0.54  | -0.86 | 0.12  | 0.28  | 0.92  | -1.80 | 2.83  | 2.68  | 2.15  |      |
| 0.91   | 3.03  | 3.87  | 2.96  | 3.29  | 2.93  | 4.58   | 2.66   | 2.20  | 4.07  | -11.23 | -13.63 | -9.89  | -10.55 | -7.92  | -18.07 | -0.14 | 0.38  | 0.56  | -1.90 | 0.02  | -0.08 | -0.74 | -1.08 | -1.06 | 2.02  | 5.28  | 3.00  |      |
| 0.50   | 1.88  | 0.25  | 1.71  | 0.52  | -0.51 | -0.23  | 2.40   | 1.36  | 1.53  | 0.38   | -0.88  | 0.46   | -0.46  | 0.44   | -0.25  | -0.51 | 0.58  | -0.62 | 0.55  | -1.55 | -1.22 | 0.7   |       |       |       |       |       |      |

|        |        |       |       |       |       |        |        |        |        |        |        |        |        |        |        |       |       |       |       |       |       |       |       |       |       |       |       |
|--------|--------|-------|-------|-------|-------|--------|--------|--------|--------|--------|--------|--------|--------|--------|--------|-------|-------|-------|-------|-------|-------|-------|-------|-------|-------|-------|-------|
| 0.90   | 1.01   | -0.65 | -0.20 | -0.16 | -0.34 | 0.64   | 0.14   | 0.13   | -0.29  | -0.53  | 0.26   | -0.85  | -1.21  | -1.38  | 0.61   | 0.06  | 0.12  | -1.61 | -0.18 | -1.27 | 1.24  | 0.39  | 0.24  | -0.42 | 0.34  | 1.13  | 2.64  |
| 0.50   | 0.44   | 2.85  | 2.28  | 0.47  | 2.05  | 3.15   | 2.37   | 0.75   | 1.76   | -0.65  | -0.08  | -0.05  | -0.58  | 0.47   | -0.27  | 1.17  | 1.14  | 1.69  | 0.46  | 0.91  | 0.45  | 0.54  | -0.26 | 0.24  | -0.71 | 2.19  | 1.37  |
| 2.02   | 1.12   | 3.50  | 2.67  | 1.84  | 4.78  | 4.95   | 4.03   | 3.05   | 4.82   | 0.72   | -0.64  | -0.34  | -0.12  | 0.14   | 0.45   | -0.77 | 0.48  | 1.37  | 1.42  | 0.15  | 0.57  | 1.44  | 2.34  | 1.36  | 3.08  | 1.00  | 2.36  |
| 4.20   | 1.41   | 0.85  | 4.34  | 5.37  | 5.54  | -0.79  | -4.75  | 7.00   | 7.23   | 27.66  | 29.33  | 25.83  | 18.71  | 17.89  | 24.00  | 4.87  | 2.09  | 3.40  | 3.57  | 2.75  | 4.48  | 8.11  | 6.12  | 7.96  | 4.95  | 4.50  | 10.44 |
| 7.24   | 4.01   | -3.43 | 8.22  | 5.09  | 6.18  | -5.70  | -9.64  | 11.30  | 10.24  | 46.51  | 50.12  | 47.20  | 41.35  | 36.17  | 41.44  | 10.69 | 4.49  | 7.04  | 9.93  | 5.84  | 10.91 | 18.76 | 10.66 | 11.90 | 8.72  | 5.68  | 15.09 |
| -5.94  | -1.50  | -8.48 | -2.13 | -4.48 | -5.47 | -10.60 | -2.49  | -5.39  | 2.40   | -18.34 | -14.67 | -16.55 | -15.85 | -16.59 | -13.70 | -0.72 | -2.26 | 1.80  | -1.28 | -1.48 | -2.71 | 5.57  | -2.68 | -3.05 | -1.46 | -2.41 | -4.22 |
| 5.40   | 4.23   | 5.33  | 8.62  | 2.57  | 1.48  | -5.73  | 2.75   | 8.25   | 8.22   | 14.34  | 7.97   | 11.94  | 13.86  | 9.78   | 3.55   | 5.61  | 1.30  | 1.20  | 1.51  | 1.62  | 5.06  | 3.41  | 2.48  | 1.69  | 9.26  | 8.14  | 16.83 |
| -0.06  | 1.06   | -4.68 | 0.64  | -7.38 | 1.15  | 0.45   | -6.82  | -2.94  | 2.54   | 0.36   | 0.10   | -1.32  | -2.05  | -0.33  | 0.59   | 0.55  | 0.44  | -0.47 | -0.37 | 0.51  | 1.54  | 1.84  | 0.61  | -0.10 | 1.38  | 1.64  | 2.88  |
| -1.14  | -1.23  | -1.03 | -1.77 | 0.01  | 0.20  | 0.57   | -0.70  | 0.00   | -0.40  | 0.37   | -0.57  | 0.52   | -0.42  | -0.35  | -1.26  | 0.21  | 1.12  | -0.41 | 1.14  | 1.50  | 1.90  | 0.34  | 0.60  | -0.22 | -0.97 | -0.60 | -0.95 |
| 0.66   | 3.70   | 2.08  | 2.32  | 2.88  | 0.94  | 3.20   | 2.29   | 1.14   | 4.04   | -0.65  | 0.43   | 0.86   | -1.17  | 0.72   | 1.72   | 1.04  | 0.83  | 0.23  | 1.39  | 1.32  | 0.48  | 1.82  | 1.41  | 2.77  | 1.83  | 2.51  | 2.93  |
| -0.46  | -1.34  | 0.17  | -0.02 | -0.85 | -1.24 | -1.22  | 0.01   | -0.96  | -0.42  | 0.20   | 0.19   | -1.30  | -0.40  | -0.27  | -1.42  | -0.46 | -0.16 | -0.33 | -1.29 | -1.31 | -0.07 | -0.38 | -0.76 | -1.77 | 0.75  | 0.42  | -0.28 |
| 2.22   | 2.75   | 2.79  | 3.17  | 2.88  | 1.59  | 1.96   | 2.77   | 2.18   | 1.43   | 0.94   | 2.73   | 0.94   | -0.33  | 0.69   | 1.18   | 1.52  | 0.08  | 0.74  | 1.93  | 1.61  | 1.88  | 1.84  | 0.50  | 2.43  | 2.39  | 3.27  | 3.07  |
| -3.53  | -3.15  | -1.77 | 0.46  | 0.39  | -1.05 | -3.06  | -1.60  | -1.66  | -0.46  | -0.93  | -0.55  | 1.00   | -0.28  | 0.00   | -0.90  | -0.80 | -1.57 | -2.12 | -2.47 | -1.48 | -1.59 | -1.68 | -0.77 | -3.22 | -1.49 | -2.65 | -0.27 |
| -2.37  | -4.14  | -0.85 | -0.46 | -0.59 | 0.38  | -0.59  | 0.48   | -0.22  | -0.29  | 0.52   | -0.89  | 0.56   | 0.33   | -0.27  | -0.98  | -0.87 | -1.44 | -1.63 | -1.87 | -1.28 | -1.46 | -1.45 | -2.04 | -1.06 | -1.11 | -1.36 | -0.87 |
| -0.54  | -1.17  | 0.25  | 2.30  | -0.10 | 0.93  | -0.68  | 0.88   | 1.32   | 0.88   | 0.54   | -0.56  | 0.58   | -0.06  | -0.28  | -0.48  | 1.08  | -0.75 | 0.31  | -0.63 | -0.47 | -0.78 | -0.58 | -1.16 | -1.57 | -0.42 | -0.18 | -0.63 |
| 3.45   | 3.93   | 1.11  | 2.47  | 3.17  | 0.43  | 4.90   | 1.44   | 1.46   | 3.74   | 0.63   | -0.83  | -0.32  | 0.60   | -0.06  | -1.08  | 1.46  | 2.50  | 1.28  | 1.26  | 2.03  | 1.50  | 1.41  | 1.79  | 0.61  | 3.39  | 3.50  | 2.61  |
| 2.08   | 1.73   | 2.30  | 2.66  | 1.77  | 1.89  | 5.66   | 2.72   | 1.83   | 3.24   | -0.12  | 0.17   | 0.94   | -0.08  | 0.48   | 0.12   | 1.04  | 0.64  | 0.88  | 0.03  | 1.09  | 1.36  | 1.31  | 0.51  | 0.56  | 0.77  | 1.08  | 1.37  |
| 0.99   | 1.07   | 2.03  | 0.61  | 2.92  | -0.86 | -0.34  | 0.38   | 1.11   | 1.62   | 0.06   | 0.70   | -0.45  | 1.64   | 0.39   | -0.63  | 0.88  | -0.46 | 0.45  | -0.27 | -0.66 | -0.57 | -0.18 | 0.78  | -0.05 | 2.21  | 0.15  | 1.23  |
| 3.28   | 5.34   | 2.03  | 9.92  | 2.12  | 1.56  | -0.31  | 2.44   | 3.60   | 2.78   | 10.23  | 8.13   | 6.12   | 7.25   | 8.04   | 5.46   | 2.98  | -0.92 | 1.14  | -0.46 | 1.32  | 1.05  | 1.18  | 3.03  | 5.59  | 4.94  | 11.15 | 12.12 |
| 7.51   | 5.28   | 2.82  | 13.71 | 3.58  | -0.79 | -2.09  | 2.28   | 7.86   | 1.97   | 18.65  | 11.30  | 13.56  | 10.92  | 14.87  | 9.07   | 5.61  | 2.50  | 2.36  | 4.30  | 3.27  | 3.60  | 4.27  | 4.07  | 7.06  | 10.46 | 16.40 | 17.29 |
| -0.63  | -1.00  | -2.63 | -3.19 | -5.79 | -5.88 | -5.23  | -0.01  | -2.54  | -4.51  | -8.27  | -4.38  | -5.83  | -7.02  | -5.91  | -4.61  | -1.68 | 0.75  | 0.69  | -0.32 | -1.37 | -0.80 | -0.43 | -2.29 | -2.12 | -2.81 | -0.60 | -5.56 |
| 0.58   | 2.37   | 0.58  | 3.39  | -5.62 | -1.11 | -11.39 | -4.92  | -1.02  | -3.97  | 2.89   | 4.90   | 3.90   | 2.08   | 3.65   | 1.66   | 0.79  | -0.75 | 0.23  | -2.32 | -1.23 | 0.74  | 0.44  | -1.36 | -0.59 | 0.37  | 0.39  | 1.52  |
| 0.76   | 1.76   | 0.81  | 1.87  | -4.87 | -2.00 | -13.55 | -6.20  | -0.34  | -6.07  | 5.77   | 8.00   | 7.08   | 4.30   | 6.06   | 5.83   | 0.52  | -0.26 | 0.83  | -1.44 | -0.20 | 2.46  | 1.19  | 0.88  | 1.22  | 1.15  | 2.43  | 2.95  |
| -1.40  | -1.16  | -2.07 | 0.61  | -8.13 | -2.61 | -9.57  | -6.50  | -1.51  | -5.13  | -15.52 | -14.59 | -15.99 | -12.84 | -13.10 | -13.06 | -0.45 | -0.92 | -0.97 | -1.32 | 0.00  | -1.54 | -1.71 | -3.30 | -4.55 | -1.35 | 0.63  | 0.12  |
| 0.60   | 1.72   | 3.37  | 3.45  | -0.28 | 0.28  | 1.48   | 1.15   | 0.81   | 3.01   | 2.12   | 0.25   | -1.08  | 0.05   | 0.44   | -0.74  | 1.42  | -0.02 | -0.27 | -1.81 | 0.49  | 0.16  | 0.66  | 0.43  | 0.07  | 0.48  | 1.19  | 0.90  |
| -0.52  | -0.63  | 1.50  | 0.01  | 0.32  | 0.72  | -1.68  | -0.09  | -0.83  | -0.34  | -0.46  | -0.65  | 0.26   | -0.86  | -0.77  | 0.67   | -0.10 | -0.58 | -0.08 | -0.28 | -0.79 | -0.92 | -0.07 | -0.59 | -0.06 | -0.70 | 2.30  | 0.65  |
| 1.39   | 0.38   | 1.17  | 3.08  | 1.12  | 3.66  | 2.15   | 1.10   | 2.92   | 2.91   | 0.80   | 0.16   | -2.31  | 0.37   | 0.04   | 0.47   | 0.27  | 0.75  | -0.21 | -0.07 | -0.57 | -0.17 | -0.39 | 0.82  | 0.08  | 1.87  | -0.21 | 4.36  |
| -14.46 | -5.95  | -2.26 | 2.89  | -0.04 | -1.17 | -0.12  | 3.17   | 1.01   | 3.66   | 0.89   | 2.57   | -0.35  | -0.46  | 0.33   | 0.84   | 1.43  | 0.44  | 1.25  | -0.50 | 0.03  | 1.50  | 0.53  | 0.83  | 0.23  | 0.16  | 2.48  | 1.94  |
| 0.81   | 0.18   | 2.40  | 1.83  | 1.29  | 1.20  | 1.88   | 1.36   | 2.19   | 2.09   | 2.67   | 2.45   | 1.84   | 1.46   | 1.10   | 1.55   | 0.64  | 2.21  | 1.83  | 0.10  | 1.72  | 1.97  | 2.19  | 1.31  | 2.30  | 2.12  | 3.24  | 3.01  |
| 8.18   | 4.54   | 2.04  | 5.22  | 2.59  | 1.96  | 2.81   | 4.23   | 1.44   | 3.74   | 3.21   | 4.44   | 2.01   | 4.54   | 1.14   | 3.74   | 3.80  | 3.91  | 2.30  | 1.34  | 3.23  | 3.52  | 2.56  | 2.61  | 3.47  | 2.92  | 4.45  | 3.21  |
| 1.86   | 2.19   | 2.61  | 1.37  | 2.22  | 1.20  | 2.19   | 1.49   | 2.23   | 2.02   | 1.16   | 1.39   | 0.66   | 0.19   | 2.00   | 1.23   | 2.17  | 1.66  | 1.30  | 1.46  | 1.90  | 1.13  | 1.17  | 3.42  | 2.32  | 2.03  | 2.70  | 0.65  |
| 2.16   | 1.40   | 2.33  | 2.06  | 1.89  | 1.07  | 2.75   | 1.73   | 1.77   | 2.42   | 1.01   | 1.29   | 1.17   | 1.30   | 0.24   | 1.83   | 0.80  | 1.11  | 1.35  | 1.64  | 1.38  | 1.46  | 1.21  | 1.54  | 1.09  | 1.12  | 2.09  | 3.58  |
| 1.73   | 1.54   | 1.30  | 2.22  | 0.07  | 1.20  | 1.58   | 2.19   | 1.96   | 1.29   | 0.04   | -0.06  | 0.31   | -0.14  | 0.36   | 0.40   | 1.47  | 1.70  | -0.33 | -0.47 | 1.48  | 1.17  | 0.77  | -0.62 | 1.19  | 1.75  | 1.87  | 2.74  |
| -0.75  | -0.57  | -0.78 | 0.61  | -1.72 | -2.62 | -3.56  | -2.83  | -1.12  | -2.29  | -0.93  | -0.28  | 0.39   | -1.09  | 0.28   | 0.03   | 0.58  | -0.49 | -0.19 | -0.22 | 0.63  | 0.33  | 1.26  | -0.08 | 0.52  | 0.71  | 1.13  | 1.22  |
| 0.24   | 0.51   | -0.39 | 1.95  | 0.05  | -0.03 | -0.13  | 0.35   | -1.03  | 0.22   | -1.13  | -0.31  | -1.90  | -1.59  | -1.07  | -0.51  | 0.32  | 0.09  | -0.23 | -0.32 | 0.23  | 0.86  | -0.47 | -0.19 | -0.67 | -0.18 | 2.10  | 0.74  |
| 1.90   | 1.05   | 0.32  | 2.01  | 1.10  | 3.00  | 3.91   | 1.80   | 1.17   | 1.06   | 0.78   | 0.97   | 2.44   | 1.37   | 0.49   | 0.90   | 0.66  | 1.17  | -1.26 | -2.30 | 0.75  | -1.72 | -0.47 | -0.76 | -1.05 | 3.04  | 0.88  | 2.75  |
| 1.75   | 1.23   | -0.43 | 1.67  | -1.12 | 0.54  | 2.61   | -0.24  | -1.73  | -0.85  | -2.73  | -2.08  | -2.24  | -2.11  | -1.65  | -0.98  | 2.02  | 1.73  | 1.33  | 1.41  | 0.29  | 1.72  | 1.50  | 1.26  | 0.70  | 0.11  | 2.21  | 0.26  |
| 1.35   | 0.82   | 1.82  | 2.23  | 2.11  | 2.30  | 4.30   | 3.92   | 1.17   | 3.00   | 0.53   | 0.15   | 0.04   | -0.43  | -0.07  | 0.47   | 0.69  | -0.31 | 0.12  | -0.37 | 0.74  | 0.32  | 0.97  | -0.25 | -0.38 | 0.14  | 0.74  | 1.54  |
| 0.06   | 1.83   | 1.60  | 2.57  | -1.57 | 0.15  | 1.08   | -0.37  | 0.43   | -0.53  | 0.27   | 0.29   | 0.81   | 0.24   | -0.93  | -0.73  | -0.02 | 1.09  | -0.96 | 0.04  | -1.23 | 0.72  | -0.08 | -0.47 | 0.09  | -0.11 | 1.28  | 1.77  |
| -0.34  | -0.04  | 0.57  | 2.78  | -3.72 | -5.36 | -8.91  | -4.40  | 0.67   | -2.74  | 7.95   | 9.17   | 8.42   | 7.98   | 5.98   | 8.51   | -0.24 | -0.73 | 0.10  | -0.43 | 0.30  | -0.70 | 1.84  | -1.15 | 1.30  | 0.60  | 1.42  | 1.88  |
| 0.59   | 1.29   | 0.86  | 2.89  | -2.73 | -6.93 | -11.27 | -3.47  | 2.48   | -4.46  | 7.81   | 9.22   | 8.97   | 8.88   | 6.60   | 8.08   | -0.31 | -0.61 | 0.19  | -0.83 | 0.12  | -0.39 | 1.18  | -1.09 | 0.35  | 1.26  | 1.92  | 0.81  |
| -3.55  | -2.80  | -2.92 | -0.06 | -8.03 | -8.67 | -11.04 | -8.35  | -2.82  | -7.30  | -20.75 | -22.20 | -18.14 | -17.33 | -16.04 | -19.48 | -0.62 | -1.54 | -2.33 | -0.84 | -1.40 | 0.04  | -1.88 | -3.09 | -2.24 | -0.52 | -4.68 |       |
| 1.83   | 1.80   | 1.94  | 1.61  | 2.56  | -1.39 | 2.17   | 2.39   | 0.32   | 1.19   | -13.08 | -11.73 | -10.81 | -9.08  | -8.08  | -13.65 | -1.80 | -0.72 | -1.53 | -0.07 | -1.83 | 0.10  | -0.94 | -1.02 | -2.22 | 1.00  | 3.18  | 2.99  |
| -0.10  | 2.89   | 4.21  | 3.23  | 2.78  | 2.98  | 3.88   | 2.70   | 2.62   | 2.82   | -18.22 | -18.34 | -14.85 | -14.02 | -12.07 | -19.74 | -2.61 | -1.43 | -1.86 | -3.49 | -0.88 | -1.88 | -2.27 | -3.33 | -3.70 | 1.52  | 5.30  | 2.01  |
| 1.15   | 2.03   | 1.51  | 3.07  | 2.54  | -0.57 | -2.03  | 2.28   | 2.87   | 1.72   | -0.92  | -0.91  | -0.02  | -1.77  | -1.26  | -0.45  | -1.53 | -0.78 | -1.60 | -0.15 | -1.39 | -1.70 | -0.37 | -0.07 | -0.88 | 1.75  | 2.92  | 3.60  |
| -12.53 | -12.79 | -8.00 | -5.74 | -9.88 | -8.64 | -9.36  | -12.26 | -11.64 | -11.38 | -9.68  | -14.11 | -9.15  | -8.75  | -8.33  | -11.03 | -9.10 | -9.06 | -7.62 | -7.84 | -5.86 | -7.16 | -6.48 | -5.60 | -7.96 | -8.76 | -6.89 | -9.86 |
| 1.59   | 1.41   | 1.20  | 1.16  | 0.96  | 0.61  | 0.29   | 0.20   | 1.39   | 2.15   | 1.84   | 2.68   | 0.20   | 0.22   | 0.90   | 0.99   | 0.26  | 0.80  | -1.18 | 0.12  | 1.07  | 0.82  | 0.84  | -0.26 | 0.77  | -2.21 | 2.09  | 2.37  |
| 0.78   | 1.52   | 0.85  | 1.50  | 1.08  | -1.10 | -0.97  | -2.26  | 0.18   | 0.95   | 1.24   | 1.46   | -0.30  | 0.33   | -1.07  | -0.46  | -0.14 | 2.26  | 1.33  | 0.60  | 0.35  | -1    |       |       |       |       |       |       |

|        |        |        |       |        |        |        |        |        |        |        |        |        |        |        |        |       |       |       |       |       |       |       |       |       |       |        |        |
|--------|--------|--------|-------|--------|--------|--------|--------|--------|--------|--------|--------|--------|--------|--------|--------|-------|-------|-------|-------|-------|-------|-------|-------|-------|-------|--------|--------|
| 5.86   | 2.84   | 3.90   | 10.13 | 10.66  | 10.47  | 5.81   | -1.68  | 11.57  | 10.09  | 18.22  | 16.67  | 17.04  | 8.17   | 11.71  | 13.88  | 8.96  | 5.12  | 6.67  | 7.29  | 6.04  | 7.82  | 11.44 | 10.55 | 17.29 | 6.52  | 7.79   | 14.34  |
| 10.60  | 4.88   | 3.05   | 15.10 | 12.21  | 13.13  | 0.04   | -4.80  | 21.52  | 17.03  | 30.43  | 23.66  | 28.51  | 20.65  | 22.64  | 24.32  | 21.04 | 11.05 | 14.26 | 17.52 | 13.88 | 18.17 | 25.86 | 20.88 | 27.34 | 13.46 | 10.15  | 22.77  |
| -7.39  | -1.59  | -12.92 | -3.49 | -8.80  | -8.45  | -14.39 | -5.10  | -7.01  | -2.77  | -14.25 | -8.63  | -12.82 | -8.40  | -14.10 | -7.65  | -5.32 | -5.48 | -5.32 | -5.69 | -3.61 | -5.61 | -0.28 | -6.18 | -8.53 | -3.35 | -2.54  | -7.07  |
| 8.06   | 7.45   | 9.82   | 11.50 | 12.62  | 11.43  | 4.02   | 10.77  | 12.54  | 15.89  | -9.85  | -20.80 | -16.81 | -27.52 | -9.57  | -10.47 | 7.43  | 2.69  | 2.37  | 3.30  | 2.96  | 7.01  | 6.30  | 4.04  | 3.53  | 14.09 | 10.50  | 20.29  |
| 0.33   | 1.03   | -4.35  | 0.99  | -6.40  | 3.01   | 2.48   | -5.77  | -2.59  | 3.77   | -3.98  | -5.39  | -6.97  | -9.94  | -4.52  | -1.76  | 0.38  | 0.70  | 0.74  | 0.08  | 0.75  | 1.94  | 2.15  | 0.86  | -0.30 | 1.78  | 1.67   | 2.41   |
| -0.34  | -0.47  | -0.94  | -1.61 | 0.11   | 0.56   | 0.22   | 0.09   | 0.70   | -1.10  | 0.11   | -0.06  | 0.31   | -0.89  | -0.28  | 0.90   | 1.25  | 1.36  | 0.05  | 1.52  | 1.20  | 0.96  | 0.50  | 1.32  | 0.40  | -0.92 | -1.32  | 0.09   |
| 0.63   | 3.01   | 1.90   | 2.72  | 3.15   | 1.86   | 3.79   | 2.67   | 1.54   | 4.14   | 1.06   | 1.11   | 1.13   | 0.13   | 2.59   | 1.79   | 1.14  | 0.44  | -0.66 | 0.49  | 2.34  | 0.54  | 2.69  | 0.97  | 1.84  | 2.39  | 4.08   | 1.90   |
| -0.50  | -1.59  | -0.20  | 0.34  | -0.76  | -0.76  | -0.21  | -0.43  | -0.67  | 0.28   | -1.35  | -0.10  | -1.72  | -1.01  | -1.22  | -1.72  | -0.28 | -0.75 | -0.77 | -0.92 | 0.24  | -0.52 | -0.83 | -0.87 | -0.27 | 0.52  | -0.22  | 0.22   |
| 2.47   | 3.77   | 1.87   | 2.08  | 3.22   | 1.15   | 3.22   | 1.67   | 2.88   | 1.59   | 0.98   | 3.36   | 1.45   | -0.33  | 1.35   | 3.59   | 1.10  | -0.33 | 1.77  | 2.04  | 2.23  | 1.73  | 2.06  | -0.64 | 1.96  | 3.26  | 4.63   | 3.38   |
| -2.82  | -3.54  | -2.11  | 0.14  | 0.27   | -1.72  | -2.79  | 0.05   | -2.35  | -0.40  | -2.96  | -4.62  | -3.05  | -3.47  | -2.56  | -3.85  | -0.88 | -1.63 | -2.01 | -2.53 | -1.56 | -1.42 | -1.13 | -1.38 | -2.95 | -0.53 | -2.22  | -0.69  |
| -2.38  | -3.69  | -0.92  | 0.41  | -0.44  | 0.08   | -0.35  | 0.21   | 0.19   | 0.13   | -2.14  | -4.46  | -2.40  | -2.56  | -2.52  | -2.89  | -0.56 | -1.45 | -1.26 | -0.86 | -1.48 | -0.80 | -1.16 | -1.30 | -1.13 | -0.64 | -0.77  | -0.05  |
| -0.26  | -1.08  | 1.68   | 0.26  | 0.20   | -0.47  | -0.57  | 2.02   | -0.12  | 1.32   | -0.37  | -2.38  | -0.22  | -0.79  | -2.41  | -1.67  | -0.09 | -1.00 | 0.71  | 0.01  | -1.62 | -0.38 | -0.74 | -0.54 | -1.91 | 0.05  | 0.37   | -0.36  |
| 4.08   | 4.83   | 1.94   | 4.03  | 2.80   | 1.84   | 4.65   | 2.38   | 2.30   | 3.50   | -0.20  | 1.07   | 0.20   | 1.46   | 0.80   | -0.27  | 1.38  | 2.37  | 1.08  | 1.43  | 1.47  | 2.29  | 1.94  | 1.77  | 0.54  | 4.51  | 3.83   | 2.89   |
| 1.63   | 1.58   | 2.14   | 1.53  | 1.97   | 1.30   | 5.64   | 2.52   | 1.17   | 2.92   | 1.42   | 2.42   | 3.07   | 3.42   | 1.40   | 1.72   | 0.91  | 0.34  | 0.40  | 0.81  | 0.54  | 0.51  | 1.08  | 0.39  | -0.19 | 0.63  | 1.46   | 0.83   |
| 1.49   | 0.86   | 1.67   | 2.21  | 2.54   | 1.26   | -0.29  | 1.41   | 0.53   | 0.35   | 0.48   | -0.14  | 0.98   | 0.17   | -0.84  | -2.11  | 0.24  | -0.86 | 0.85  | -0.46 | 0.05  | 0.74  | -0.14 | 1.89  | 1.45  | 2.90  | 0.01   | 2.06   |
| 6.03   | 7.87   | 3.37   | 14.79 | 4.88   | 4.18   | 1.79   | 4.61   | 6.20   | 3.49   | -1.34  | -2.13  | -2.12  | -1.63  | -1.80  | -7.99  | 6.76  | 1.43  | 2.62  | 4.13  | 4.08  | 3.43  | 4.71  | 5.97  | 9.26  | 8.79  | 16.76  | 15.52  |
| 11.44  | 9.40   | 5.35   | 20.47 | 7.74   | 2.12   | -0.01  | 4.17   | 12.10  | 6.27   | -1.03  | -6.11  | -1.83  | -4.50  | -11.52 | 12.48  | 6.84  | 7.12  | 9.97  | 8.06  | 8.63  | 9.71  | 10.14 | 14.36 | 16.29 | 24.13 | 24.56  |        |
| -2.78  | -1.39  | -5.10  | -6.26 | -8.41  | -8.29  | -5.58  | -8.64  | -5.88  | -5.57  | -0.02  | 4.47   | 0.10   | 0.12   | 0.94   | 5.26   | -4.68 | -1.89 | -1.87 | -3.37 | -2.95 | -2.05 | -2.78 | -3.78 | -5.50 | -5.80 | -9.05  | -10.29 |
| 0.90   | 2.53   | -0.08  | 3.46  | -5.41  | -2.06  | -1.04  | -4.82  | -0.40  | -3.47  | 1.74   | 2.51   | 3.05   | 0.68   | 3.46   | 0.78   | 0.95  | -1.55 | -0.34 | -0.94 | 0.20  | 1.28  | 0.99  | -0.99 | 0.59  | 2.25  | 1.13   | 2.03   |
| 1.19   | 1.48   | 0.62   | 1.95  | -4.96  | -2.57  | -13.31 | -5.89  | -0.22  | -6.12  | 4.01   | 4.24   | 4.58   | 1.65   | 4.26   | 3.47   | 2.04  | 1.23  | 1.90  | 0.12  | 0.26  | 2.88  | 1.72  | 2.22  | 2.67  | 1.64  | 1.83   | 3.97   |
| -1.50  | -1.47  | -2.33  | -1.18 | -8.91  | -5.67  | -10.98 | -1.42  | -3.75  | -6.94  | -9.88  | -7.52  | -11.05 | -6.79  | -8.32  | -5.54  | -3.17 | -1.89 | -2.72 | -5.08 | -1.84 | -3.42 | -3.52 | -5.09 | -9.02 | -1.05 | -0.94  | -1.56  |
| 0.90   | 1.92   | 1.62   | 2.45  | 1.85   | 0.76   | 2.35   | 1.49   | 0.61   | 1.72   | 1.08   | 0.82   | -1.70  | -1.68  | -0.74  | -0.38  | 1.41  | -0.31 | -0.70 | -1.78 | -0.72 | 1.58  | 0.21  | -0.11 | 0.16  | 1.59  | 2.05   | 0.96   |
| -0.99  | -0.12  | 1.37   | 0.26  | -0.42  | 1.01   | -0.48  | 0.04   | -0.48  | 0.40   | -0.43  | 0.66   | 1.12   | 0.65   | 0.19   | 1.32   | 0.05  | -0.57 | -0.02 | -0.26 | -0.37 | -0.82 | -0.56 | -0.52 | 0.06  | -0.55 | 1.29   | 0.39   |
| 0.77   | 1.38   | 1.47   | 3.04  | 1.41   | 2.10   | 2.86   | 3.14   | 3.08   | 3.94   | -1.30  | -5.37  | -1.18  | -3.48  | -3.49  | -1.31  | 0.51  | 0.57  | -0.01 | 1.76  | -1.62 | -0.22 | 0.39  | 0.99  | 1.16  | 1.81  | 2.06   | 4.72   |
| -14.63 | -6.49  | -1.01  | 3.83  | 1.84   | 0.10   | -0.41  | 3.77   | 1.86   | 3.59   | 1.12   | 2.90   | -0.09  | -1.50  | -0.52  | 0.36   | 1.21  | 0.69  | 0.01  | 0.65  | 0.51  | 0.05  | 1.59  | 0.42  | 0.33  | 1.05  | 5.21   | 2.86   |
| 1.12   | -0.41  | 1.76   | 1.90  | 0.92   | 1.39   | 1.69   | 1.79   | 1.82   | 3.52   | 0.86   | 3.20   | 1.57   | 1.20   | 1.39   | 1.49   | 1.19  | 2.34  | 1.20  | 0.91  | 1.59  | 2.83  | 1.20  | 1.31  | 1.98  | 2.74  | 4.28   | 2.56   |
| 8.11   | 5.93   | 2.85   | 5.53  | 2.98   | 1.74   | 2.75   | 3.32   | 1.81   | 3.53   | 1.50   | 3.36   | 0.80   | 5.38   | 0.96   | 3.32   | 3.39  | 4.12  | 2.30  | 1.37  | 2.37  | 3.16  | 3.36  | 3.63  | 3.52  | 4.28  | 4.90   | 3.97   |
| 1.73   | 1.97   | 2.70   | 2.26  | 2.59   | 2.06   | 1.20   | 1.55   | 1.31   | 1.86   | 0.41   | 0.94   | 1.25   | 0.71   | 2.44   | 0.97   | 2.31  | 1.35  | 1.52  | 0.99  | 2.17  | 1.72  | 1.39  | 3.58  | 2.11  | 2.39  | 2.64   | 1.41   |
| 1.96   | 1.78   | 2.10   | 2.23  | 1.45   | 1.18   | 2.69   | 1.51   | 1.73   | 3.06   | 1.43   | 1.52   | 1.71   | 1.60   | 0.31   | 2.49   | 1.67  | 1.49  | 1.46  | 1.77  | 1.01  | 1.06  | 1.24  | 1.85  | 0.81  | 1.88  | 3.34   | 3.30   |
| 1.76   | 1.46   | -0.10  | 1.64  | -0.61  | 1.62   | 1.33   | 3.28   | 2.30   | -0.14  | -0.12  | -0.34  | 0.98   | -0.49  | 0.74   | 0.39   | 1.22  | 1.70  | -0.05 | 0.67  | 0.66  | 1.47  | 0.08  | -0.46 | 2.03  | 2.48  | 2.17   | 2.66   |
| -0.63  | 0.55   | -1.48  | 0.72  | -1.52  | -3.02  | -3.72  | -2.32  | -0.83  | -1.33  | -0.97  | -0.79  | -0.81  | -1.46  | 0.49   | 0.92   | 0.04  | 0.17  | -0.08 | -0.74 | 0.32  | 2.11  | 1.24  | -0.40 | -0.10 | 1.06  | 0.78   | 2.13   |
| 0.48   | 0.14   | -0.94  | 1.52  | 0.83   | -0.17  | 2.16   | -0.14  | -0.18  | 0.58   | 0.64   | 0.96   | -0.06  | -0.27  | 0.48   | 0.01   | -1.16 | -0.12 | -0.32 | -0.32 | 0.04  | -0.21 | -0.61 | -1.75 | -0.21 | 1.28  | -0.16  | 0.28   |
| 3.72   | 2.17   | 2.76   | 2.18  | 1.62   | 2.69   | 6.05   | 2.50   | 2.00   | 1.29   | 0.46   | 0.20   | 0.30   | -0.59  | 0.66   | 1.02   | -0.51 | 1.49  | -1.10 | -1.28 | 1.13  | 0.10  | -0.71 | -0.35 | -0.54 | 3.20  | 1.96   | 2.96   |
| 1.28   | 1.27   | -1.50  | -0.92 | -1.09  | 1.73   | 2.25   | -0.23  | -2.13  | -1.31  | 0.96   | 2.41   | 2.11   | 2.62   | 2.63   | 1.85   | 1.08  | 2.00  | 0.50  | -0.35 | -1.52 | 0.57  | 0.73  | -0.74 | -0.80 | 0.57  | 1.54   | 0.56   |
| 1.40   | 0.98   | 2.13   | 2.92  | 2.20   | 2.88   | 4.96   | 3.43   | 0.99   | 3.21   | -1.23  | -1.01  | 0.05   | -1.02  | -0.55  | 0.07   | 0.66  | -0.28 | -0.06 | 0.45  | 0.90  | 1.06  | 1.09  | 0.21  | 0.42  | 0.28  | 1.90   | 1.26   |
| 0.15   | 1.16   | 0.67   | -0.42 | -0.41  | 1.40   | 2.08   | 1.41   | 0.85   | 0.28   | -1.40  | 0.24   | -1.79  | -1.51  | -0.42  | -1.01  | 0.15  | 1.03  | -0.80 | -0.28 | -1.50 | 0.47  | 0.21  | 0.46  | -0.25 | 0.63  | 1.80   | 2.91   |
| 1.07   | 0.94   | -0.06  | 3.98  | -3.72  | -6.06  | -9.09  | -6.34  | 2.96   | -2.24  | 5.31   | 3.70   | 4.48   | 3.88   | 3.52   | 4.84   | 1.91  | -0.37 | -0.17 | -0.52 | 1.02  | 2.00  | 3.25  | -0.66 | 2.32  | 2.47  | 1.66   | 1.82   |
| 2.45   | 1.83   | 1.17   | 2.55  | -2.03  | -6.89  | -10.53 | -4.74  | 3.35   | -5.22  | 5.02   | 4.58   | 5.41   | 4.66   | 3.92   | 5.33   | 0.44  | 0.02  | 0.87  | 0.33  | 0.85  | 0.82  | 2.64  | 0.46  | 2.19  | 2.13  | 2.08   | 1.83   |
| -4.24  | -4.46  | -4.01  | 0.13  | -9.97  | -11.08 | -12.83 | -13.58 | -6.64  | -10.00 | -15.64 | -11.01 | -11.02 | -8.28  | -9.73  | -4.80  | -6.06 | -4.29 | -4.11 | -6.06 | -1.96 | -4.39 | -3.03 | -4.71 | -8.92 | -1.00 | -1.25  | -8.70  |
| 0.74   | 2.34   | 0.80   | 1.20  | 0.09   | -0.59  | 2.44   | 1.94   | 0.92   | -1.32  | -12.65 | -8.56  | -9.37  | -6.13  | -6.34  | -9.63  | -3.83 | -2.12 | -3.12 | -2.45 | -2.65 | -2.05 | -3.43 | -2.91 | -3.82 | 1.56  | 3.60   | 2.03   |
| -0.96  | 2.72   | 2.96   | 0.74  | 0.98   | 1.41   | 3.61   | 1.65   | 0.99   | 1.49   | -18.02 | -13.52 | -12.73 | -9.34  | -9.71  | -15.93 | -6.31 | -3.97 | -3.66 | -5.90 | -4.17 | -4.86 | -4.45 | -5.96 | -9.81 | 1.37  | 4.55   | 1.68   |
| 1.18   | 1.03   | 1.32   | 3.72  | -0.49  | -1.60  | -1.55  | 3.75   | 2.99   | 0.89   | -1.61  | -0.70  | -0.54  | -1.62  | 0.25   | 0.67   | -2.34 | -0.51 | -2.05 | -0.82 | -1.31 | -1.58 | 0.01  | -1.72 | -0.24 | 1.20  | 2.75   | 3.96   |
| -15.00 | -14.26 | -8.84  | -9.26 | -11.64 | -10.31 | -12.67 | -13.99 | -12.90 | -13.06 | -13.35 | -16.06 | -14.83 | -12.19 | -9.48  | -12.35 | -9.60 | -9.70 | -8.34 | -7.18 | -2.88 | -7.07 | -7.94 | -8.31 | -9.81 | -6.83 | -12.40 |        |
| 1.40   | 1.65   | 0.43   | 1.42  | 0.46   | 0.93   | 1.60   | 0.47   | 1.36   | 2.52   | 1.30   | 1.86   | 0.09   | -0.06  | 0.80   | 0.86   | 0.96  | 0.15  | 0.67  | 0.46  | 0.67  | 0.68  | -0.01 | -0.73 | 0.23  | -0.61 | 2.17   | 2.66   |
| 1.70   | 2.58   | 0.96   | 1.00  | 1.16   | -1.10  | 0.01   | -2.64  | 2.09   | 1.68   | -0.77  | 1.85   | 0.21   | -1.12  | -1.59  | 1.09   | -0.04 | 2.21  | 0.52  | 0.09  | -0.59 | -0.15 | -0.57 | -1.05 | 1.03  | -1.54 | 1.27   | 0.96   |
| -0.95  | 0.34   | -0.17  | -0.34 | 1.08   | -0.64  | -1.31  | 0.46   | -1.10  | 1.60   | 0.03   | 0.90   | -1.22  | -0.73  | 0.23   | -1.18  | -0.76 | -2.48 | -1.19 | -0.06 | -0.50 | -1.25 | 0.68  | -0.63 | -0.99 | -0.26 | 1.11   | 0.67   |
| -0.98  | -1.03  | -0.34  | 1.07  | 0.46   | -0.54  | 0.06   | -0.24  | -0.53  | -0.13  | -1.24  | -0.38  | -0.24  | -1.30  | -0.70  | -0.87  | -0.36 | -0.09 | -0.26 | -0.25 | 0.17  | 0.18  | -0.09 | -0.48 | -1.15 | -0.02 | 0.25   | 0.12   |
| 1.14   | 1.17   | 0.62   | -0.57 | -0.18  | 1.73   | 1.16   | 2.82   | 0.17   | 2.66   | 0.90   | 1.10   | 0.90   | 0.90   | -2.00  | 1.91   | 0.61  | 0.08  | -0.14 | -1    |       |       |       |       |       |       |        |        |

|        |        |        |        |        |        |        |        |        |        |        |        |        |        |        |        |        |        |        |        |        |        |        |        |        |        |        |        |
|--------|--------|--------|--------|--------|--------|--------|--------|--------|--------|--------|--------|--------|--------|--------|--------|--------|--------|--------|--------|--------|--------|--------|--------|--------|--------|--------|--------|
| 11.38  | 12.87  | 15.70  | 14.24  | 20.46  | 17.70  | 16.16  | 19.76  | 16.17  | 22.43  | -47.59 | -52.01 | -55.18 | -69.45 | -39.41 | -27.89 | 9.60   | 4.16   | 3.32   | 3.96   | 5.27   | 9.69   | 8.90   | 6.39   | 2.72   | 15.77  | 12.45  | 24.24  |
| 1.39   | 1.47   | -3.42  | 0.41   | -2.52  | 4.24   | 5.84   | -5.31  | -2.33  | 4.68   | -14.02 | -14.22 | -17.75 | -24.57 | -12.56 | -4.87  | 0.69   | 0.21   | -0.13  | 0.74   | 1.43   | 2.50   | 2.70   | 0.24   | 0.32   | 1.91   | 1.99   | 3.48   |
| -0.33  | -0.67  | -1.68  | -0.15  | -0.46  | 0.42   | 0.43   | 0.06   | 0.49   | -1.16  | 1.01   | 0.22   | -0.03  | -1.03  | -0.92  | 0.03   | -1.15  | 1.24   | -0.37  | 0.82   | 2.33   | -0.13  | 0.21   | 1.57   | -0.10  | -0.91  | -1.06  | -0.47  |
| 1.06   | 3.80   | 2.25   | 2.52   | 1.90   | 3.34   | 3.78   | 2.14   | 1.48   | 2.04   | 1.87   | 1.36   | 2.34   | -0.37  | 2.37   | 2.18   | 0.96   | 0.29   | -0.61  | 0.23   | 2.09   | 0.32   | 1.50   | 1.30   | 2.22   | 1.53   | 2.39   | 3.30   |
| -0.26  | -1.17  | -0.29  | 0.52   | -0.89  | -0.88  | -1.27  | -0.14  | -1.03  | 1.03   | -1.46  | -0.70  | -2.04  | -1.24  | -1.02  | -1.60  | 0.07   | -0.17  | -0.70  | -0.92  | -1.26  | 0.13   | -0.20  | -1.06  | -0.58  | 0.22   | 0.79   | 0.01   |
| 3.10   | 2.37   | 2.12   | 2.43   | 2.51   | 1.63   | 1.40   | 1.13   | 3.26   | 1.67   | 2.60   | 2.88   | 2.45   | -0.44  | 0.82   | 2.93   | 0.66   | 0.08   | 1.83   | 3.86   | 2.13   | 1.89   | 1.98   | 3.99   | 3.27   | 2.84   | 3.07   | 3.42   |
| -3.52  | -2.95  | -0.99  | 0.19   | 0.55   | -0.24  | -2.82  | -0.07  | -0.75  | 0.17   | -6.58  | -8.20  | -6.24  | -6.38  | -5.94  | -6.21  | -0.95  | -1.55  | -2.03  | -1.79  | -0.52  | -1.30  | -0.49  | -0.20  | -2.35  | -0.61  | -2.17  | 0.23   |
| -1.78  | -3.08  | -0.34  | 1.24   | 1.02   | 1.05   | 0.51   | 1.19   | 0.80   | 0.66   | -3.90  | -7.31  | -5.18  | -5.10  | -4.67  | -5.35  | 0.00   | -1.55  | -1.28  | -1.19  | -0.48  | -0.59  | -0.32  | -1.51  | -1.97  | -0.25  | -1.16  | 0.82   |
| -0.28  | -0.28  | 0.35   | 1.40   | -0.72  | 0.85   | -1.14  | 1.41   | 1.49   | 0.48   | -1.87  | -3.48  | -1.66  | -2.93  | -3.48  | -2.78  | 0.64   | -0.72  | 0.97   | 0.40   | -0.41  | -0.87  | -0.13  | -0.59  | -2.34  | 0.66   | 0.83   | 1.54   |
| 3.74   | 5.40   | 2.02   | 3.99   | 2.55   | 1.13   | 3.97   | 1.91   | 2.20   | 3.35   | 2.34   | 1.84   | 2.80   | 2.47   | 1.76   | -1.38  | 0.97   | 2.40   | 0.42   | 1.36   | 1.21   | 1.54   | 1.17   | 1.60   | 0.74   | 3.62   | 4.85   | 3.74   |
| 2.21   | 1.69   | 2.59   | 1.78   | 1.40   | 1.32   | 4.46   | 2.54   | 0.63   | 2.33   | 3.82   | 5.01   | 5.84   | 6.00   | 3.74   | 3.92   | 0.31   | -0.37  | -0.37  | 0.30   | 0.61   | 0.56   | 0.19   | -0.19  | -0.03  | 0.75   | 5.59   | -0.03  |
| 1.70   | 1.43   | 1.53   | 3.09   | 3.21   | 0.75   | 0.85   | 0.53   | 1.86   | 1.57   | 0.41   | -0.90  | 0.69   | 1.09   | 0.07   | -2.48  | 1.09   | 0.41   | -0.44  | -1.61  | -1.17  | -0.13  | 1.57   | 0.27   | 0.86   | 2.87   | 0.86   | 2.23   |
| 9.77   | 12.15  | 6.26   | 20.02  | 7.31   | 6.08   | 3.74   | 6.92   | 7.76   | 7.45   | -6.09  | -6.71  | -3.34  | -6.40  | -6.70  | -13.49 | 9.23   | 5.93   | 6.55   | 8.03   | 7.50   | 6.10   | 15.58  | 8.87   | 4.86   | 12.89  | 23.72  | 23.67  |
| 16.79  | 16.10  | 10.47  | 30.13  | 13.25  | 6.65   | 3.21   | 9.46   | 18.19  | 10.86  | -10.70 | -10.82 | -8.40  | -10.81 | -8.20  | -19.27 | 18.56  | 14.17  | 12.75  | 17.30  | 16.47  | 15.17  | 16.83  | 16.40  | 8.30   | 22.83  | 32.09  | 34.63  |
| -4.65  | -5.14  | -6.70  | -10.18 | -10.11 | -12.40 | -9.72  | -10.10 | -8.74  | -8.14  | 3.48   | 6.54   | 1.35   | 0.48   | 2.59   | 9.18   | -6.93  | -4.73  | -2.74  | -5.93  | -5.72  | -6.07  | -6.36  | -6.00  | -2.63  | -7.90  | -13.33 | -12.73 |
| 1.06   | 2.33   | 0.86   | 5.21   | -5.09  | -3.46  | -10.44 | -3.12  | -0.22  | -4.94  | 1.70   | 2.02   | 2.46   | 0.08   | 2.97   | 0.95   | 1.53   | -0.50  | 0.32   | -1.55  | 0.19   | 1.47   | 1.13   | 0.01   | 1.16   | 0.70   | 1.54   | 3.36   |
| 1.95   | 2.15   | 0.76   | 3.84   | -4.88  | -3.11  | -13.83 | -5.58  | 0.65   | -6.77  | 3.02   | 3.61   | 1.97   | -0.08  | 2.86   | 2.00   | 4.24   | 2.55   | 3.37   | 2.57   | 1.57   | 4.95   | 3.63   | 4.45   | 4.40   | 2.43   | 2.86   | 5.37   |
| -3.51  | -2.89  | -4.63  | -3.82  | -11.01 | -8.12  | -12.22 | -8.81  | -7.11  | -9.72  | -6.26  | -3.92  | -6.88  | -3.10  | -4.93  | -2.54  | -7.86  | -5.60  | -5.81  | -9.62  | -6.00  | -7.91  | -7.24  | -10.69 | -10.69 | -2.51  | -4.34  | -3.51  |
| 1.22   | 2.15   | 2.08   | 2.03   | 2.59   | 0.51   | 1.84   | 2.01   | 0.38   | 2.39   | -0.73  | -0.86  | -1.21  | -1.46  | -0.14  | -2.12  | 1.31   | -0.66  | -1.07  | -1.68  | 0.25   | 0.23   | -0.71  | -0.29  | 0.45   | 1.08   | 2.30   | 1.96   |
| -0.82  | -0.06  | 0.64   | 0.69   | -0.50  | 1.11   | -0.80  | 0.57   | -0.40  | 0.32   | 2.59   | 3.58   | 2.91   | 2.27   | 1.62   | 3.94   | -0.08  | -1.20  | -0.36  | -0.78  | -0.66  | -1.02  | 0.14   | -0.38  | -0.13  | -0.74  | 1.42   | 0.42   |
| 0.72   | 1.29   | 1.02   | 2.60   | 1.97   | 2.94   | 2.48   | 1.63   | 3.19   | 3.94   | -7.23  | -8.30  | -8.02  | -7.32  | -7.04  | -8.39  | 0.39   | 0.50   | -0.24  | 0.44   | -0.68  | -0.30  | 0.15   | 0.81   | 1.30   | 2.59   | 2.10   | 4.32   |
| -15.45 | -6.53  | -0.34  | 3.21   | 0.53   | 0.05   | -1.00  | 3.32   | 2.28   | 3.51   | 1.51   | 2.40   | 0.78   | -1.42  | 0.13   | 2.02   | 1.79   | 0.70   | 0.27   | -1.02  | 1.03   | 0.65   | 1.00   | 0.10   | 0.77   | 1.33   | 3.61   | 4.02   |
| 1.25   | 0.14   | 2.63   | 2.86   | 1.23   | 1.78   | 1.89   | 1.79   | 1.39   | 2.22   | 2.77   | 3.12   | 1.27   | 1.18   | 0.80   | 0.22   | 0.81   | 2.57   | 1.99   | 0.97   | 1.33   | 2.01   | 2.30   | 1.91   | 2.10   | 3.07   | 3.89   | 2.73   |
| 8.65   | 7.23   | 2.28   | 6.19   | 2.16   | 2.52   | 3.04   | 4.17   | 1.92   | 2.90   | 2.22   | 2.83   | 1.06   | 3.62   | 0.80   | 2.59   | 4.17   | 4.97   | 3.30   | 3.41   | 3.92   | 4.24   | 2.56   | 3.03   | 3.82   | 5.94   | 6.15   | 5.68   |
| 1.81   | 3.10   | 2.52   | 1.54   | 1.67   | 1.94   | 2.45   | 0.99   | 1.83   | 2.39   | 2.10   | 2.52   | 1.33   | 1.40   | 2.50   | 2.25   | 2.00   | 2.49   | 1.67   | 1.46   | 2.26   | 0.96   | 1.09   | 2.85   | 2.45   | 2.82   | 3.47   | 1.59   |
| 2.33   | 1.91   | 2.40   | 2.36   | 2.89   | 0.98   | 2.63   | 2.33   | 2.22   | 1.97   | 1.49   | 2.21   | 2.04   | 2.01   | 0.77   | 1.44   | 1.46   | 1.27   | 1.15   | 1.50   | 1.34   | 1.59   | 1.46   | 1.78   | 1.21   | 1.72   | 2.87   | 3.52   |
| 1.72   | 3.25   | 0.87   | 1.47   | -0.49  | 1.34   | 1.52   | 2.64   | 0.72   | 1.09   | 0.93   | 0.13   | 1.03   | 0.32   | 0.12   | 1.67   | 1.63   | 1.72   | -0.04  | -0.26  | 0.71   | 0.90   | -0.35  | -0.35  | 1.57   | 2.45   | 1.69   | 2.79   |
| -0.59  | 0.82   | -1.84  | 1.14   | -2.63  | -3.43  | -4.21  | -3.30  | -1.30  | -1.77  | -1.87  | -0.26  | -1.45  | -1.57  | -0.15  | -0.30  | -0.30  | -0.46  | -0.18  | -1.10  | -0.41  | 0.26   | 0.87   | -0.51  | -0.64  | 1.13   | 0.36   | 0.80   |
| 0.30   | 0.10   | 0.01   | 0.31   | -0.50  | -0.90  | -0.34  | 0.27   | -1.88  | 0.32   | 0.01   | 0.56   | -1.14  | 0.25   | -0.10  | 0.65   | -0.04  | -1.22  | -0.83  | -0.47  | -0.19  | -0.08  | -0.65  | -0.90  | -0.61  | -0.42  | -0.02  | -0.85  |
| 3.06   | 3.03   | 2.07   | 2.35   | 3.19   | 2.94   | 2.50   | 2.68   | 2.82   | 2.08   | -0.67  | 1.38   | 1.31   | 0.27   | -0.15  | -0.44  | -0.42  | 0.71   | -1.82  | -1.53  | -0.29  | 0.12   | -0.01  | -0.32  | -0.23  | 2.41   | 1.13   | 2.82   |
| 0.42   | 0.75   | -2.90  | -2.33  | -3.10  | 0.66   | 1.02   | -1.32  | -4.25  | -2.29  | 3.66   | 4.65   | 3.97   | 3.68   | 3.87   | 5.21   | 1.17   | 0.81   | -0.67  | -0.99  | -1.31  | 0.36   | -0.30  | -0.73  | 0.03   | -1.86  | 0.04   | -0.63  |
| 1.73   | 1.12   | 2.89   | 3.14   | 3.35   | 3.56   | 6.14   | 4.99   | 1.58   | 3.16   | 3.35   | -1.47  | -0.61  | -1.55  | -1.61  | -0.99  | 1.06   | 0.70   | 1.05   | -0.58  | 1.16   | 0.75   | 1.33   | 0.55   | -0.18  | 0.52   | 1.84   | 2.07   |
| 1.24   | 1.64   | 1.30   | 2.09   | 0.57   | 0.49   | 0.95   | 0.52   | 0.48   | 1.07   | -0.08  | -1.26  | -1.93  | -1.81  | -1.18  | -1.11  | -0.04  | 0.32   | -1.21  | -0.82  | -0.59  | 0.97   | 0.00   | -0.50  | 0.43   | 1.60   | 1.24   | 0.81   |
| 1.32   | 1.86   | 0.29   | 4.61   | -2.93  | -6.17  | -9.05  | -6.59  | 4.26   | -3.42  | 2.24   | 2.71   | 2.62   | 2.42   | 1.66   | 3.88   | 3.24   | 0.60   | 2.79   | 1.62   | 2.13   | 1.62   | 4.08   | 1.47   | 4.00   | 2.76   | 2.10   | 2.52   |
| 3.13   | 2.27   | 2.05   | 3.30   | -2.54  | -7.79  | -11.77 | -4.01  | 5.41   | -5.09  | 3.72   | 2.84   | 3.87   | 2.80   | 2.54   | 3.61   | 2.87   | 1.11   | 2.47   | 2.67   | 2.79   | 3.25   | 4.56   | 3.02   | 4.01   | 2.38   | 3.00   | 2.91   |
| -6.18  | -5.36  | -7.52  | -4.14  | -13.83 | -13.90 | -15.66 | -15.69 | -11.08 | -13.35 | -7.00  | -6.47  | -5.01  | -2.02  | -3.84  | -3.17  | -12.46 | -7.96  | -8.14  | -11.24 | -5.83  | -9.40  | -8.24  | -11.42 | -14.48 | -2.66  | -4.41  | -12.08 |
| 0.39   | 1.97   | 0.05   | 0.24   | -1.0   | -0.92  | 1.92   | 1.75   | -1.76  | -2.16  | -10.83 | -5.72  | -6.57  | -3.24  | -3.70  | -6.94  | -5.78  | -4.89  | -5.17  | -4.60  | -4.11  | -3.51  | -4.54  | -5.36  | -7.88  | 1.29   | 2.46   | 1.84   |
| -1.17  | 1.94   | 1.17   | -1.58  | -0.71  | 0.77   | 1.62   | 1.08   | -1.06  | -0.61  | -14.18 | -8.50  | -8.84  | -4.28  | -6.32  | -10.75 | -12.64 | -8.80  | -8.83  | -10.86 | -8.43  | -9.59  | -9.08  | -11.26 | -17.05 | 0.72   | 2.70   | -0.01  |
| 0.91   | 0.51   | 2.09   | 3.23   | 0.20   | -1.80  | -2.44  | 1.86   | 1.92   | 0.25   | 1.18   | 1.27   | -0.69  | 2.00   | 0.41   | -0.68  | -1.24  | -1.85  | -0.89  | -2.59  | -3.24  | -0.06  | -2.46  | -0.37  | 1.01   | 2.99   | 5.34   |        |
| -16.26 | -17.80 | -9.78  | -10.85 | -14.69 | -13.11 | -13.99 | -16.30 | -14.26 | -16.62 | -15.87 | -19.57 | -18.40 | -14.36 | -11.95 | -16.09 | -11.51 | -12.24 | -10.75 | -10.20 | -8.78  | -9.85  | -8.55  | -8.19  | -9.94  | -11.28 | -10.26 | -13.83 |
| 2.21   | 1.62   | 1.08   | 0.96   | 1.94   | 0.93   | 1.01   | 0.56   | 1.25   | 2.37   | 2.77   | 3.02   | 0.80   | 0.41   | 1.71   | 1.71   | 0.79   | 1.01   | -0.06  | 0.15   | 0.75   | 0.92   | 0.55   | -0.29  | 0.95   | -0.81  | 2.54   | 2.69   |
| 2.73   | 4.09   | 0.35   | 1.22   | 0.88   | 0.66   | 0.55   | -1.34  | 0.86   | 1.96   | 1.86   | 2.08   | 0.24   | -0.39  | -0.70  | 0.71   | 0.25   | 1.50   | 0.00   | 0.03   | 0.55   | -0.16  | -0.81  | -0.98  | 1.44   | -1.23  | 2.37   | 2.21   |
| -1.09  | 0.59   | -0.37  | -0.70  | 0.74   | -0.18  | -1.03  | -0.29  | 0.53   | 1.14   | 0.26   | 0.24   | -0.92  | 0.82   | 0.39   | -1.63  | -0.29  | -1.96  | -1.19  | -0.65  | 1.10   | -0.30  | 0.26   | -0.34  | -0.91  | -0.25  | 1.54   | 0.47   |
| -0.48  | -0.84  | -0.43  | 1.54   | 0.73   | -0.89  | -0.10  | 0.34   | -0.27  | 0.23   | -0.84  | -0.41  | 0.26   | -1.36  | -0.59  | -0.46  | -0.10  | 0.05   | 0.05   | -0.71  | -1.01  | -0.01  | 0.02   | -0.74  | -1.86  | -0.14  | 0.40   | 0.48   |
| 0.67   | 2.16   | 1.30   | 0.19   | -0.77  | 2.08   | 0.53   | 2.17   | -1.03  | 1.46   | -0.57  | 0.73   | 0.06   | -0.23  | -1.14  | 1.13   | -0.22  | 1.03   | 0.15   | -0.66  | -0.10  | -1.23  | 0.14   | 2.11   | 2.56   | 1.97   | 1.97   | 3.06   |
| 0.94   | 0.21   | -10.71 | -12.21 | -6.78  | -10.08 | -0.952 | -23.05 | -17.77 | -17.37 | -7.47  | -8.74  | -13.51 | -7.92  | -10.61 | -11.09 | -10.87 | -7.62  | -8.58  | -10.17 | -9.58  | -7.52  | -9.90  | -11.79 | -10.90 | -10.21 | -7.79  | 0.67   |
| 1.56   | -0.05  | -12.83 | -20.90 | -10.68 | -11.23 | -17.23 | -21.57 | -21.37 | -18.54 | -10.80 | -13.65 | -16.84 | -11.21 | -16.54 | -15.60 | -16.74 | -11.63 | -15.10 | -14.49 | -16.76 | -15.34 | -15.16 | -18.48 | -18.15 | -19.62 | -14.47 | -3.96  |
| 0.89   | -0.94  | -15.84 | -31.51 | -17.01 | -14.21 | -19.50 | -25.31 | -28.30 | -23.13 | -16.52 | -19.69 | -26.6  |        |        |        |        |        |        |        |        |        |        |        |        |        |        |        |

|        |        |        |        |        |        |        |        |        |        |        |        |        |        |        |        |        |        |        |        |        |        |        |        |        |        |        |        |
|--------|--------|--------|--------|--------|--------|--------|--------|--------|--------|--------|--------|--------|--------|--------|--------|--------|--------|--------|--------|--------|--------|--------|--------|--------|--------|--------|--------|
| 0.95   | 1.86   | 1.28   | 2.33   | 0.73   | 1.67   | 3.41   | 2.16   | 1.33   | 1.85   | 2.01   | 2.65   | 2.40   | 0.83   | 2.29   | 3.42   | 1.48   | 0.13   | -0.31  | 0.96   | 2.06   | 0.20   | 2.01   | 0.85   | 2.48   | 2.05   | 2.71   | 2.07   |
| -0.32  | -0.49  | 0.33   | 0.54   | 0.10   | -0.94  | -1.76  | 0.37   | -0.96  | 1.18   | -1.39  | -0.76  | -2.53  | -1.86  | -0.83  | -1.99  | -0.30  | -0.37  | -0.13  | -1.07  | -0.76  | -0.08  | -0.63  | -0.74  | -1.20  | -0.22  | 1.05   | 0.02   |
| 2.81   | 3.69   | 1.46   | 1.83   | 2.45   | 0.83   | 1.54   | -0.37  | 3.17   | 1.01   | 3.21   | 4.33   | 3.33   | 1.44   | 1.24   | 3.22   | 1.34   | 0.57   | 0.97   | 2.18   | 1.61   | 0.98   | 2.01   | 1.03   | 2.93   | 2.54   | 2.98   | 3.58   |
| -3.51  | -3.21  | -0.47  | 0.41   | 2.10   | 0.07   | -3.01  | 0.30   | -0.59  | 0.76   | -3.73  | -9.51  | -7.90  | -7.87  | -8.15  | -3.28  | -1.22  | -0.90  | -1.54  | -2.73  | -0.55  | -1.22  | -1.46  | -0.85  | -4.61  | -0.01  | -1.20  | 0.50   |
| -1.56  | -1.84  | 1.28   | 1.03   | 1.23   | 1.34   | 0.15   | 1.63   | 0.98   | 1.33   | -7.14  | -9.47  | -7.04  | -7.14  | -7.21  | -6.56  | -0.80  | -1.12  | -0.96  | -1.80  | -0.40  | -0.61  | -0.97  | -2.28  | -2.05  | -0.09  | -1.34  | 1.54   |
| -0.40  | 0.55   | 1.77   | 0.86   | 1.59   | 0.42   | -0.47  | 1.96   | 1.45   | 1.62   | -1.61  | -3.79  | -2.35  | -3.66  | -4.08  | -2.73  | 1.09   | -0.85  | 1.20   | 2.05   | -0.77  | -0.08  | -0.84  | -0.54  | -2.07  | 0.95   | 1.57   | 2.66   |
| 5.13   | 6.02   | 2.30   | 4.68   | 2.82   | 1.07   | 2.64   | 2.03   | 2.31   | 3.18   | 2.83   | 1.80   | 3.01   | 3.17   | 3.07   | -0.21  | 2.10   | 1.71   | 0.65   | 1.26   | 1.66   | 2.70   | 1.86   | 1.01   | 1.39   | 5.65   | 4.22   | 3.87   |
| 1.18   | 1.76   | 2.14   | 0.80   | 0.79   | 0.02   | 3.40   | 1.34   | 0.47   | 2.49   | 5.43   | 6.31   | 8.02   | 7.88   | 5.53   | 4.57   | 1.19   | -0.13  | -0.16  | -0.30  | 0.11   | 0.25   | 1.47   | 1.53   | 1.64   | -0.44  | 0.58   | 0.22   |
| 2.13   | 2.92   | 1.33   | 2.10   | 3.71   | 1.01   | 0.25   | 1.85   | 1.94   | 3.02   | 0.08   | 0.37   | 0.33   | -1.35  | -1.13  | -2.54  | 0.95   | 0.44   | 0.01   | -0.02  | -0.71  | 1.00   | -0.05  | 0.66   | 0.37   | 3.43   | 0.90   | 1.90   |
| 13.65  | 15.34  | 9.32   | 26.50  | 11.15  | 9.41   | 5.66   | 11.99  | 13.05  | 10.72  | -8.48  | -7.22  | -6.91  | -8.44  | -7.95  | -15.27 | 2.60   | 7.17   | 5.90   | 3.25   | 8.70   | 4.64   | 4.25   | 2.62   | -3.69  | 16.18  | 29.62  | 32.34  |
| 23.94  | 23.86  | 15.83  | 39.97  | 20.97  | 13.82  | 7.56   | 16.08  | 26.48  | 17.27  | -12.70 | -12.50 | -10.57 | -12.73 | -10.03 | -20.50 | 4.39   | 17.23  | 13.53  | 10.91  | 16.04  | 11.10  | 9.83   | 5.22   | -5.94  | 30.26  | 43.17  | 45.81  |
| -7.67  | -7.22  | -9.09  | -14.37 | -15.10 | -16.00 | -12.39 | -13.90 | -10.85 | -11.14 | 1.52   | 7.14   | 2.60   | 2.22   | 4.05   | 9.81   | -1.14  | -6.39  | -4.48  | -2.89  | -6.34  | -4.26  | -3.00  | -1.94  | 2.88   | -9.44  | -17.21 | -16.15 |
| 1.13   | 3.19   | 2.03   | 3.74   | -5.96  | -2.72  | -12.29 | -2.32  | 0.90   | -4.88  | 1.89   | 1.60   | 2.92   | -0.43  | 2.30   | 3.99   | 1.75   | 0.28   | 0.21   | -0.50  | 1.38   | 2.27   | 2.02   | -0.25  | 1.66   | 2.92   | 1.42   | 4.18   |
| 2.76   | 3.96   | 1.21   | 6.14   | -3.74  | -3.01  | -14.52 | -4.71  | 2.86   | -5.05  | 1.77   | 3.17   | 2.18   | -1.16  | 2.72   | 1.40   | 4.54   | 4.99   | 6.31   | 3.79   | 3.73   | 6.29   | 4.07   | 5.04   | 3.21   | 4.15   | 5.40   | 7.22   |
| -5.61  | -4.13  | -7.60  | -8.17  | -16.04 | -11.68 | -17.19 | -11.28 | -12.68 | -13.35 | -4.10  | -0.99  | -4.99  | -3.05  | -5.10  | 0.29   | -8.29  | -10.94 | -11.68 | -11.00 | -9.12  | -11.49 | -9.81  | -11.50 | -7.75  | -6.00  | -8.12  | -8.22  |
| 0.71   | 1.85   | 1.18   | 2.49   | 2.58   | 0.48   | 2.70   | 1.03   | 0.36   | 2.55   | -1.23  | -1.70  | -1.30  | -2.91  | -1.75  | -2.28  | 1.06   | -1.08  | -0.97  | -1.43  | -0.21  | 0.92   | -0.03  | 0.55   | 0.27   | 1.48   | 1.38   | 2.06   |
| -0.69  | -0.23  | 1.25   | 0.69   | -1.05  | 0.43   | -0.62  | 0.32   | -1.16  | -0.05  | 4.92   | 5.12   | 4.24   | 3.38   | 3.69   | 5.16   | -0.37  | -0.88  | -0.66  | -0.16  | -0.49  | -1.04  | -0.34  | -0.13  | 0.20   | -1.15  | 1.08   | 0.03   |
| 0.81   | 1.19   | 1.39   | 2.76   | 3.04   | 2.86   | 2.74   | 2.62   | 3.21   | 3.95   | -10.79 | -9.31  | -10.52 | -9.07  | -8.84  | -9.92  | 0.19   | -0.62  | -0.59  | 0.03   | -0.57  | -0.48  | -0.09  | -0.03  | -1.42  | 0.93   | 2.97   | 4.56   |
| -16.39 | -7.06  | -0.61  | 2.82   | 0.30   | -1.23  | 0.74   | 3.16   | 2.15   | 3.83   | 0.97   | 2.93   | 1.27   | -1.85  | -0.42  | 1.30   | 1.81   | 0.68   | 0.68   | -1.33  | 0.45   | 0.51   | 1.21   | 0.67   | 0.80   | 2.69   | 4.42   | 3.54   |
| 1.54   | -0.02  | 2.35   | 2.88   | 1.34   | 1.60   | 1.41   | 1.59   | 1.44   | 2.27   | 3.12   | 2.58   | 1.26   | 1.82   | 1.74   | 0.83   | 1.07   | 2.42   | 2.53   | 0.83   | 2.26   | 2.47   | 2.20   | 1.79   | 1.88   | 3.39   | 4.03   | 3.56   |
| 11.23  | 8.16   | 1.83   | 5.50   | 2.15   | 0.94   | 3.36   | 4.22   | 1.64   | 2.72   | 1.57   | 3.19   | 1.19   | 4.70   | 0.93   | 2.57   | 2.77   | 4.93   | 2.75   | 2.76   | 3.73   | 4.14   | 3.98   | 3.21   | 3.92   | 6.71   | 6.91   | 4.95   |
| 1.81   | 2.47   | 2.21   | 2.07   | 1.85   | 1.79   | 1.90   | 2.39   | 1.94   | 2.05   | 2.26   | 3.19   | 1.96   | 1.65   | 3.30   | 1.70   | 1.94   | 2.60   | 2.31   | 1.60   | 1.88   | 1.20   | 1.15   | 2.28   | 2.16   | 2.33   | 1.27   | 0.56   |
| 2.30   | 2.30   | 2.07   | 2.03   | 2.45   | 0.82   | 1.90   | 1.27   | 2.38   | 2.09   | 2.14   | 2.32   | 2.40   | 2.48   | 1.73   | 2.46   | 1.40   | 1.58   | 0.93   | 1.17   | 0.67   | 0.81   | 1.40   | 2.08   | 1.50   | 2.04   | 2.54   | 3.76   |
| 1.14   | 0.21   | 1.41   | 1.54   | -0.84  | 0.98   | 1.30   | 2.89   | -0.13  | 1.15   | 0.63   | 1.23   | 1.01   | 1.50   | 2.29   | 2.26   | 1.50   | 1.51   | -0.24  | 0.60   | 1.97   | 0.67   | 0.40   | 0.36   | 1.90   | 2.14   | 1.97   | 3.39   |
| -0.46  | 0.53   | -1.27  | 0.33   | -2.54  | -2.18  | -5.97  | -3.11  | -2.15  | -2.64  | -2.77  | -0.64  | -1.14  | -1.66  | -1.07  | -0.54  | 0.25   | -0.37  | -0.93  | -0.68  | -0.28  | 0.05   | 1.18   | -0.32  | -0.88  | 1.04   | -0.21  | 0.61   |
| 0.19   | -0.56  | -0.99  | -1.61  | -1.16  | -2.57  | -0.18  | -1.34  | -2.62  | 0.20   | 0.57   | 0.54   | -0.36  | -0.57  | 0.59   | 1.10   | 0.43   | -1.31  | -0.59  | -0.78  | -1.17  | 0.90   | -0.67  | -0.19  | -0.02  | -1.84  | -1.26  | -2.84  |
| 2.46   | 3.69   | 1.95   | 3.78   | 2.80   | 3.99   | 4.22   | 2.74   | 3.47   | 1.90   | -0.37  | 0.97   | 1.94   | -0.41  | 0.77   | -0.16  | -0.52  | 0.87   | -1.64  | -1.41  | 0.80   | -1.16  | 1.06   | -0.67  | -0.20  | 4.70   | 2.94   | 4.04   |
| -0.54  | 0.13   | -3.42  | -3.66  | -3.30  | -3.22  | -0.43  | -2.82  | -5.86  | -4.07  | 5.00   | 5.66   | 4.59   | 4.25   | 4.33   | 6.05   | 2.11   | 0.06   | -1.14  | -0.55  | -2.51  | 0.08   | -0.42  | 0.86   | 2.56   | -3.38  | 1.56   | -2.62  |
| 1.72   | 1.60   | 2.77   | 4.07   | 3.38   | 3.78   | 6.38   | 4.53   | 2.38   | 3.42   | -2.84  | -1.36  | -0.95  | -2.17  | -1.33  | -1.32  | 0.58   | 0.81   | 0.84   | -0.03  | 1.21   | 0.82   | 1.27   | -0.68  | -1.32  | 1.43   | 3.05   | 2.37   |
| 1.10   | 2.47   | 0.37   | 0.64   | -0.01  | 0.02   | 1.29   | 0.70   | 1.35   | 0.11   | -1.12  | -0.80  | -2.18  | -1.87  | -1.17  | -0.74  | 0.73   | -0.08  | -1.61  | -0.19  | -1.15  | 0.86   | 0.19   | -0.50  | 0.27   | 2.35   | 1.74   | 1.87   |
| 2.87   | 1.99   | 2.90   | 5.13   | -2.06  | -5.89  | -8.80  | -4.62  | 6.28   | -2.68  | 2.10   | 2.28   | 1.55   | 2.23   | 1.61   | 3.61   | 3.66   | 2.15   | 3.59   | 2.82   | 4.04   | 3.00   | 5.61   | 1.61   | 3.04   | 2.93   | 2.63   | 4.08   |
| 3.51   | 2.82   | 3.20   | 5.27   | -0.64  | -7.90  | -12.73 | -4.11  | 8.13   | -2.93  | 2.83   | 2.02   | 3.05   | 3.10   | 2.11   | 3.25   | 3.39   | 3.05   | 3.55   | 5.19   | 5.82   | 5.06   | 5.92   | 4.14   | 2.96   | 3.63   | 4.79   | 5.03   |
| -8.73  | -7.55  | -8.86  | -11.11 | -19.19 | -18.44 | -19.07 | -17.82 | -19.17 | -17.42 | -5.21  | -3.59  | -2.49  | -0.68  | -1.38  | -0.07  | -10.68 | -14.84 | -16.20 | -16.38 | -13.26 | -11.26 | -13.10 | -12.77 | -8.44  | -5.75  | -9.66  | -18.51 |
| -1.04  | 0.56   | -1.99  | -3.66  | -2.03  | -3.18  | 0.10   | 0.64   | -4.13  | -4.97  | -8.50  | -4.62  | -5.14  | -1.98  | -2.43  | -4.27  | -7.97  | -6.62  | -9.40  | -6.92  | -7.45  | -6.44  | -7.46  | -8.74  | -8.94  | -0.12  | -0.26  | -0.14  |
| -3.16  | 0.31   | -1.88  | -5.33  | -4.35  | -2.61  | -0.70  | -1.77  | -4.67  | -3.18  | -10.71 | -6.41  | -5.59  | -1.91  | -3.98  | -5.74  | -15.25 | -14.02 | -13.55 | -15.00 | -12.56 | -13.99 | -13.00 | -14.40 | -17.72 | -0.71  | -1.74  | -3.05  |
| 2.66   | 1.95   | 1.87   | 1.55   | -0.26  | -2.70  | -2.67  | -0.73  | 1.82   | 0.22   | 0.46   | 1.05   | 0.64   | -0.54  | 1.35   | 1.66   | -2.43  | -2.36  | -2.22  | -2.37  | -3.43  | -3.60  | -0.72  | -4.39  | -0.50  | 1.22   | 3.75   | 4.77   |
| -18.58 | -20.03 | -12.89 | -12.98 | -16.87 | -14.65 | -16.42 | -19.02 | -17.78 | -19.52 | -18.86 | -22.79 | -20.61 | -16.33 | -14.67 | -17.88 | -12.93 | -12.39 | -12.56 | -11.46 | -9.65  | -11.22 | -9.18  | -8.88  | -11.60 | -1.64  | -12.55 | -15.49 |
| 2.24   | 2.56   | 1.26   | 1.32   | 1.70   | 1.20   | 1.36   | -0.15  | 1.61   | 3.19   | 3.22   | 2.88   | 1.46   | 1.07   | 1.65   | 1.73   | 0.79   | 0.76   | 1.28   | 0.22   | 1.42   | 1.77   | 0.83   | -0.16  | 1.35   | 0.03   | 2.57   | 2.65   |
| 3.05   | 3.38   | 0.94   | 2.70   | 1.96   | 0.33   | -0.48  | -0.25  | 2.08   | 2.82   | 3.25   | 3.89   | 2.75   | 1.14   | 0.69   | 2.13   | 1.46   | 1.20   | 0.36   | -0.31  | -1.52  | -1.08  | 0.67   | -2.01  | 1.94   | -1.69  | 2.06   | 1.90   |
| -0.84  | 0.06   | -0.23  | 0.68   | 0.83   | -1.23  | -1.28  | 0.35   | -0.96  | 0.46   | 0.17   | -0.08  | 1.43   | -0.49  | 0.15   | -0.32  | 0.09   | -2.32  | -1.48  | 0.28   | 0.03   | -1.29  | 0.31   | -0.27  | -0.69  | -0.26  | 1.63   | 0.94   |
| -1.07  | -1.66  | 0.08   | 0.81   | 0.16   | -0.72  | -0.90  | -0.19  | 0.21   | 0.02   | -1.62  | -1.09  | -0.88  | -1.37  | -0.72  | -1.06  | 0.05   | 0.23   | -0.61  | -0.99  | 0.21   | 0.59   | 0.10   | -0.90  | -1.95  | -0.52  | 0.05   | 0.16   |
| 0.92   | 1.88   | 0.81   | -0.04  | -0.54  | 2.66   | 1.37   | 3.06   | -0.79  | 1.21   | 0.81   | 1.08   | 1.34   | 0.40   | 1.54   | 1.59   | -0.45  | 0.38   | 0.54   | 0.74   | 0.21   | 0.13   | 0.03   | 1.65   | 2.32   | 1.16   | 2.61   | 2.92   |
| 1.93   | 1.08   | -9.77  | -15.65 | -6.03  | -9.61  | -21.05 | -16.30 | -18.54 | -17.89 | -7.77  | -13.99 | -15.97 | -9.17  | -12.84 | -12.56 | -12.74 | -10.44 | -12.49 | -12.81 | -13.37 | -10.35 | -13.68 | -13.83 | -12.64 | -10.84 | -7.61  | 2.01   |
| 2.49   | 0.38   | -13.04 | -22.79 | -12.06 | -10.69 | -20.06 | -16.20 | -23.14 | -18.37 | -12.62 | -18.23 | -21.51 | -14.28 | -18.52 | -19.99 | -20.90 | -17.77 | -20.50 | -19.36 | -22.21 | -19.20 | -19.75 | -22.25 | -19.07 | -19.70 | -14.29 | 0.27   |
| 1.73   | 0.02   | -15.42 | -35.98 | -19.32 | -13.62 | -21.54 | -20.96 | -30.72 | -17.83 | -29.19 | -31.82 | -18.69 | -26.56 | -30.32 | -31.90 | -28.94 | -31.92 | -30.89 | -33.18 | -29.59 | -29.70 | -33.83 | -30.37 | -27.82 | -21.37 | -2.85  | -2.85  |
| 4.49   | 4.58   | 0.03   | 7.32   | 0.69   | -5.30  | -6.87  | -4.77  | 1.81   | -5.00  | -1.39  | -1.41  | -3.08  | -3.06  | -2.14  | -2.96  | -0.93  | 2.50   | 2.39   | 1.57   | 1.48   | 1.62   | 2.76   | 0.46   | 0.05   | 7.12   | 9.38   | 8.96   |
| 4.23   | 4.99   | -0.48  | 9.48   | -2.39  | -7.19  | -10.02 | -8.04  | 0.67   | -8.70  | -2.97  | -1.03  | -4.93  | -3.46  | -2.53  | -2.18  | 0.82   | 3.42   | 2.61   | 1.95   | 1.82   | 2.81   | 1.42   | 0.01   | -0.89  | 7.85   | 10.00  | 8.59   |
| -10.73 | -12.94 | -14.68 | -23.91 | -13.66 | -19.40 | -13.86 | -15.21 | -16    |        |        |        |        |        |        |        |        |        |        |        |        |        |        |        |        |        |        |        |

|        |        |        |        |        |        |        |        |        |        |        |        |        |        |        |        |        |        |        |        |        |        |        |        |        |        |        |        |      |
|--------|--------|--------|--------|--------|--------|--------|--------|--------|--------|--------|--------|--------|--------|--------|--------|--------|--------|--------|--------|--------|--------|--------|--------|--------|--------|--------|--------|------|
| -3.16  | -1.88  | 0.35   | 1.82   | 3.17   | 1.97   | -1.87  | 1.21   | 0.27   | 2.05   | -8.15  | -10.85 | -9.01  | -8.62  | -8.50  | -8.14  | -2.98  | -1.52  | -3.16  | -4.22  | -1.58  | -4.17  | -4.45  | -2.94  | -5.90  | 0.91   | -0.44  | 1.03   |      |
| -1.33  | -1.90  | 1.54   | 1.67   | 2.12   | 1.43   | 1.41   | 2.00   | 1.88   | 1.89   | -7.50  | -10.03 | -8.49  | -8.55  | -8.50  | -7.52  | -2.33  | -1.27  | -2.40  | -2.83  | -1.46  | -2.21  | -2.69  | -3.99  | -3.70  | 0.47   | -0.37  | 1.48   |      |
| 0.55   | 0.51   | 1.50   | 1.57   | 2.15   | 1.88   | 0.17   | 2.35   | 1.22   | 2.26   | -2.20  | -4.84  | -2.58  | -3.35  | -4.59  | -1.95  | -1.03  | -0.83  | -0.94  | 0.46   | -1.45  | -1.68  | -1.92  | -2.48  | -2.83  | 1.02   | 2.48   | 2.32   |      |
| 4.49   | 6.38   | 1.98   | 4.59   | 2.41   | 1.08   | 2.65   | 2.30   | 1.61   | 3.12   | 1.12   | 3.01   | 4.30   | 4.64   | 2.37   | 2.06   | 1.97   | 2.35   | 0.30   | 2.06   | 1.80   | 3.35   | 2.28   | 2.15   | 1.50   | 4.41   | 4.83   | 3.74   |      |
| 1.39   | 1.34   | 1.44   | 0.38   | -0.10  | -0.16  | 2.75   | 1.29   | -0.37  | 1.69   | 7.12   | 7.01   | 8.55   | 8.85   | 6.74   | 4.85   | 3.18   | 1.12   | 1.54   | 1.76   | 2.12   | 2.83   | 3.92   | 2.98   | 3.30   | -0.04  | 0.06   | -0.71  |      |
| 2.19   | 2.85   | 4.21   | 2.81   | 2.91   | 2.38   | 1.78   | 3.61   | 3.24   | 2.90   | 0.14   | 0.78   | 0.42   | -0.07  | 0.47   | -1.12  | 0.66   | 0.65   | 0.93   | -0.48  | -0.81  | 0.40   | 1.38   | -0.36  | 0.19   | 3.09   | 1.46   | 2.58   |      |
| 18.61  | 20.27  | 12.01  | 32.26  | 15.00  | 15.19  | 9.05   | 16.74  | 16.72  | 14.73  | -9.56  | -7.45  | -7.13  | -8.09  | -8.50  | -16.62 | -5.52  | -1.55  | -1.32  | -5.41  | -0.66  | -1.91  | -3.85  | -4.43  | -8.46  | 20.31  | 35.18  | 37.02  |      |
| 32.01  | 32.80  | 22.58  | 48.95  | 29.39  | 24.76  | 14.29  | 26.53  | 33.88  | 25.08  | -13.71 | -13.08 | -11.42 | -12.57 | -11.55 | -20.86 | -8.47  | 2.01   | -1.12  | -7.33  | -1.32  | -2.19  | -4.80  | -8.47  | -14.82 | 37.73  | 51.59  | 54.78  |      |
| -9.74  | -10.43 | -11.73 | -16.40 | -17.03 | -19.95 | -13.58 | -17.30 | -12.99 | -14.26 | 6.22   | 8.04   | 2.51   | 3.11   | 5.05   | 10.14  | 3.53   | -0.61  | 1.06   | 4.09   | 0.72   | 1.16   | 2.79   | 3.13   | 7.50   | -12.96 | -20.74 | -20.81 |      |
| 0.09   | 5.17   | 1.52   | 4.84   | -4.82  | -2.72  | -11.35 | -2.01  | 2.12   | -3.26  | 1.60   | 2.64   | 2.49   | -0.92  | 2.31   | -0.07  | 1.62   | 0.28   | -1.10  | -0.82  | 0.91   | 1.95   | 1.93   | -0.61  | 0.48   | 3.67   | 3.86   | 4.92   |      |
| 2.50   | 6.04   | 3.94   | 8.30   | -2.32  | -2.44  | -14.45 | -2.55  | 6.13   | -4.07  | 1.07   | 2.70   | 2.21   | -0.94  | 1.18   | 1.18   | 0.78   | 4.06   | 4.76   | 2.31   | 3.19   | 4.74   | 3.01   | -3.38  | 1.57   | 5.20   | 6.93   | 9.80   |      |
| -9.46  | -6.42  | -13.34 | -15.01 | -22.05 | -16.90 | -19.61 | -17.24 | -22.51 | -19.52 | -3.50  | -1.14  | -4.88  | -1.76  | -1.54  | 0.33   | -4.10  | -8.17  | -8.05  | -7.31  | -7.37  | -6.41  | -6.05  | -7.41  | -4.62  | -9.86  | -13.57 | -14.27 |      |
| 0.82   | 3.07   | 1.06   | 3.37   | 1.04   | 1.32   | 2.13   | 1.83   | 0.61   | 2.20   | -1.18  | -2.08  | -2.59  | -3.04  | -0.69  | -2.17  | 1.32   | -0.72  | -1.34  | -1.98  | -0.27  | 0.79   | -0.37  | -0.37  | 0.20   | 1.17   | 2.74   | 1.67   |      |
| -0.37  | 0.77   | 0.99   | 0.61   | -0.23  | 0.23   | -0.99  | -0.28  | -0.51  | 0.58   | 5.14   | 6.13   | 5.21   | 5.17   | 4.78   | 6.26   | 0.21   | -0.21  | 0.44   | 0.75   | -0.23  | -0.70  | 0.05   | 0.50   | 1.32   | -0.60  | 2.03   | 0.57   |      |
| 0.53   | 1.94   | 1.97   | 3.08   | 1.99   | 1.94   | 4.03   | 2.48   | 3.90   | 3.71   | -12.25 | -11.12 | -12.84 | -13.29 | -13.05 | -11.47 | -1.96  | -1.29  | -2.11  | -2.38  | -1.47  | -3.32  | -1.47  | -3.31  | -3.37  | 1.86   | 0.96   | 4.26   |      |
| -16.68 | -7.32  | -0.51  | 2.88   | 0.40   | -1.97  | -1.23  | 2.72   | 1.46   | 4.00   | 0.63   | 2.15   | 0.86   | -2.20  | 0.07   | 1.02   | 1.45   | 0.00   | 0.39   | -1.87  | 0.66   | 0.34   | 0.96   | 0.79   | 0.77   | 3.48   | 4.42   | 4.12   |      |
| 1.30   | 0.58   | 1.96   | 3.44   | 1.23   | 2.19   | 2.05   | 1.52   | 1.37   | 2.39   | 2.28   | 2.34   | 1.28   | 1.78   | 0.86   | 1.30   | 1.06   | 2.59   | 1.86   | 1.47   | 2.22   | 2.63   | 2.11   | 1.41   | 2.17   | 3.93   | 3.91   | 3.87   |      |
| 12.23  | 8.90   | 2.14   | 4.68   | 2.06   | 2.24   | 2.72   | 3.52   | 1.28   | 3.96   | 1.93   | 2.40   | 1.11   | 4.26   | 0.03   | 2.73   | 3.07   | 3.99   | 3.91   | 2.75   | 4.05   | 4.24   | 3.32   | 3.18   | 3.60   | 8.28   | 7.70   | 6.01   |      |
| 2.06   | 2.83   | 1.56   | 1.92   | 1.73   | 1.32   | 1.43   | 1.90   | 2.12   | 1.56   | 3.00   | 2.97   | 2.39   | 1.72   | 2.93   | 1.70   | 2.54   | 2.24   | 1.47   | 0.92   | 2.39   | 1.43   | 1.98   | 2.93   | 2.89   | 2.43   | 3.10   | 0.33   |      |
| 2.56   | 1.78   | 2.73   | 2.02   | 2.18   | 1.29   | 2.34   | 1.03   | 1.56   | 2.90   | 2.40   | 3.08   | 2.90   | 2.67   | 2.08   | 2.21   | 1.81   | 1.71   | 0.67   | 2.16   | 0.62   | 1.13   | 1.53   | 2.30   | 1.35   | 1.18   | 1.83   | 3.26   |      |
| 1.86   | 2.54   | 4.00   | 2.79   | -0.45  | 0.86   | 2.34   | 2.44   | 1.70   | 0.61   | 1.09   | 1.27   | 1.97   | 0.91   | 0.85   | 2.28   | 1.65   | 1.88   | 0.21   | 0.47   | 2.44   | 1.88   | 0.75   | -0.37  | 2.70   | 2.37   | 2.92   | 1.81   |      |
| -0.71  | -0.01  | -2.43  | 0.15   | -2.86  | -2.02  | -5.85  | -2.50  | -2.54  | -2.76  | -2.55  | -2.29  | -1.55  | -1.35  | -2.03  | 0.32   | 0.03   | -0.66  | 0.32   | 0.05   | -0.28  | 0.22   | 0.05   | 1.31   | -0.26  | -0.43  | 0.12   | -0.59  | 1.05 |
| -0.29  | -0.89  | -2.00  | -3.55  | -2.64  | -3.72  | -1.36  | -2.01  | -3.88  | -1.76  | 0.45   | 1.29   | -0.37  | 0.39   | -0.22  | 0.10   | 0.96   | -0.32  | -0.47  | -0.07  | 0.29   | 0.06   | -0.09  | 0.07   | 0.63   | -4.27  | -4.45  | -5.61  |      |
| 2.82   | 3.97   | 4.06   | 4.11   | 3.19   | 3.26   | 4.08   | 3.20   | 3.41   | 3.25   | 0.23   | -0.05  | 2.26   | 0.03   | -0.37  | 0.39   | -0.57  | 0.38   | -1.89  | -1.21  | 0.79   | 0.04   | 0.56   | -0.59  | 0.40   | 5.22   | 5.20   | 5.49   |      |
| -1.08  | -1.26  | -5.68  | -6.52  | -5.25  | -3.69  | -1.58  | -3.60  | -6.40  | -5.46  | 5.56   | 6.84   | -6.69  | -1.16  | 5.91   | 6.32   | 3.97   | 1.86   | 1.43   | 2.51   | 0.72   | 1.83   | 2.83   | 3.44   | 4.62   | -4.21  | -2.64  | -4.08  |      |
| 2.60   | 1.92   | 3.79   | 4.52   | 3.72   | 3.77   | 6.88   | -5.66  | 2.14   | 4.83   | -1.87  | -1.69  | -0.87  | -1.36  | -1.25  | -1.29  | -0.92  | 0.30   | -0.46  | -0.55  | 0.84   | -0.01  | 0.51   | -0.62  | -1.29  | 2.19   | 3.07   | 3.10   |      |
| 0.78   | 3.18   | 0.88   | 1.14   | 1.49   | 0.16   | 2.34   | 0.99   | 1.00   | 0.48   | -0.76  | -1.03  | -1.66  | -1.81  | -1.00  | -0.63  | 0.34   | -0.57  | -1.23  | -0.95  | -2.06  | 0.06   | -0.81  | -0.54  | 0.64   | 1.74   | 1.35   | 2.23   |      |
| 3.16   | 3.02   | 4.11   | 8.77   | 0.68   | -4.77  | -9.10  | -4.12  | 10.06  | 0.21   | 1.55   | 1.47   | 1.21   | 2.16   | 1.91   | 2.98   | 2.63   | 3.31   | 3.84   | 1.44   | 4.16   | 1.85   | 3.93   | 1.10   | 2.05   | 3.99   | 5.32   | 7.65   |      |
| 4.92   | 4.35   | 5.48   | 8.02   | 0.82   | -6.66  | -13.91 | -2.26  | 11.80  | -2.68  | 2.33   | 1.60   | 2.38   | 2.46   | 1.32   | 2.58   | 1.11   | 3.06   | 4.03   | 2.57   | 3.46   | 2.83   | 3.86   | 2.31   | 1.40   | 5.99   | 7.48   | 8.02   |      |
| -11.36 | -12.24 | -15.33 | -17.57 | -26.69 | -24.81 | -26.87 | -24.65 | -29.22 | -26.13 | 3.18   | -1.92  | -0.90  | 0.45   | -0.17  | 0.35   | -6.01  | -11.75 | -10.71 | -9.31  | -7.09  | -6.58  | -7.93  | -6.39  | -3.80  | -12.91 | -16.21 | -25.42 |      |
| -3.21  | -0.04  | -4.76  | -7.70  | -4.18  | -4.14  | -1.12  | -2.86  | -7.16  | -6.25  | -6.48  | -3.01  | -5.26  | -1.46  | -1.00  | -3.48  | -7.14  | -8.19  | -9.02  | -6.28  | -8.21  | -6.08  | -6.97  | -7.04  | -7.50  | -1.63  | -5.79  | -3.66  |      |
| -5.78  | -2.04  | -5.42  | -13.68 | -8.68  | -6.15  | -2.54  | -5.71  | -10.86 | -7.94  | -9.22  | -4.38  | -3.13  | 0.70   | -1.61  | -4.51  | -14.46 | -15.00 | -14.88 | -13.05 | -12.76 | -11.70 | -14.02 | -15.73 | -4.54  | -8.03  | -8.48  | -8.48  |      |
| 2.84   | 2.22   | 0.62   | 3.95   | 0.00   | -2.71  | -4.21  | 1.36   | 1.52   | 0.42   | -0.77  | 0.81   | 0.19   | -0.69  | 1.05   | 1.22   | -1.34  | -1.51  | -2.50  | -2.35  | -4.33  | -2.47  | -0.92  | -3.92  | 1.03   | 2.12   | 2.18   | 3.21   |      |
| -20.73 | -2.46  | -14.72 | -15.80 | -18.34 | -17.30 | -18.92 | -20.31 | -19.37 | -21.02 | -20.66 | -23.63 | -23.27 | -19.37 | -16.50 | -19.99 | -15.67 | -14.54 | -13.48 | -12.56 | -11.94 | -13.00 | -10.79 | -10.82 | -13.02 | -14.58 | -12.51 | -18.06 |      |
| 2.37   | 2.67   | 1.68   | 1.68   | 1.55   | 1.88   | 1.89   | 1.08   | 2.04   | 2.48   | 3.61   | 3.09   | 1.37   | 1.74   | 2.47   | 1.36   | 1.39   | 1.10   | 1.31   | 0.76   | 2.11   | 0.93   | 1.23   | 3.05   | 1.38   | -1.42  | 2.06   | 3.76   |      |
| 3.98   | 4.65   | 0.95   | 2.29   | 2.76   | -0.90  | 0.51   | 0.02   | 2.62   | 3.86   | 2.34   | 3.93   | 1.86   | 1.13   | -0.01  | 2.37   | 1.71   | 1.42   | -1.02  | 0.18   | -1.18  | -0.34  | 0.56   | -1.84  | 1.55   | -0.87  | 3.14   | 2.07   |      |
| -1.01  | 0.07   | 0.12   | -0.74  | 0.64   | -0.54  | -0.56  | 0.37   | 0.32   | 0.46   | -0.03  | 0.28   | -0.09  | -0.64  | 0.45   | -0.72  | -0.24  | -2.63  | -1.10  | 0.38   | -0.48  | -1.06  | 0.41   | 0.19   | -0.92  | -4.00  | 2.03   | 0.46   |      |
| -0.64  | -0.74  | 0.19   | 1.08   | 0.03   | -0.33  | -0.51  | -0.25  | -0.22  | 0.43   | -1.75  | -0.98  | -0.83  | -1.66  | -1.58  | -1.19  | 0.06   | 0.29   | -0.71  | -1.08  | 0.13   | 0.11   | -0.51  | -1.52  | -1.14  | -0.36  | 0.17   | 0.07   |      |
| 1.36   | 2.26   | 1.90   | 0.46   | 0.50   | 2.08   | 0.88   | 4.37   | 0.63   | 1.26   | 0.94   | 1.81   | 0.65   | 1.27   | -2.30  | 1.26   | -0.67  | 1.16   | 1.88   | 0.26   | 0.31   | -0.47  | 1.50   | 1.44   | 0.83   | 1.76   | 2.05   | 2.88   |      |
| -0.09  | -0.56  | -12.09 | -15.68 | -8.96  | -9.21  | -22.61 | -16.63 | -15.43 | -18.57 | -19.11 | -21.23 | -23.70 | -14.57 | -22.38 | -35.86 | -13.66 | -11.61 | -13.87 | -13.50 | -14.19 | -10.92 | -14.79 | -14.86 | -13.16 | -11.72 | -7.68  | 3.70   |      |
| 0.70   | -1.18  | -15.45 | -24.81 | -12.33 | -11.68 | -19.57 | -17.02 | -21.76 | -20.50 | -25.67 | -32.89 | -30.83 | -28.71 | -32.75 | -52.52 | -21.53 | -20.20 | -21.79 | -20.49 | -24.12 | -19.94 | -20.58 | -23.43 | -20.55 | -20.75 | -14.32 | -0.45  |      |
| 0.74   | -1.17  | -18.77 | -37.76 | -19.30 | -13.48 | -23.00 | -20.98 | -31.03 | -25.82 | -37.16 | -48.32 | -45.42 | -46.10 | -47.05 | -72.10 | -32.63 | -30.66 | -33.47 | -32.55 | -35.75 | -30.55 | -31.19 | -34.31 | -31.17 | -27.59 | -19.93 | -4.48  |      |
| 6.16   | 5.47   | 1.44   | 10.40  | 2.93   | -4.53  | -6.23  | -3.41  | 4.44   | -4.12  | -1.41  | -0.58  | -3.60  | -2.63  | -1.19  | -3.44  | -2.26  | -0.48  | -0.70  | -1.19  | -1.29  | -0.02  | -0.57  | -1.06  | -1.09  | 10.69  | 12.77  | 11.03  |      |
| 6.68   | 7.45   | 1.19   | 12.59  | -0.61  | -6.24  | -9.39  | -6.79  | 2.54   | -7.16  | -3.32  | -0.95  | -5.45  | -2.76  | -2.87  | -3.40  | -0.92  | 0.46   | -1.32  | -1.22  | -1.14  | 0.19   | -0.69  | -1.53  | -2.63  | 11.13  | 14.12  | 10.77  |      |
| -16.45 | -17.71 | -18.28 | -32.76 | -24.73 | -25.47 | -17.86 | -20.31 | -23.45 | -22.95 | 8.00   | 11.74  | 4.76   | 6.40   | 6.66   | 12.52  | 7.82   | -0.32  | 1.10   | 3.95   | 1.14   | 3.21   | 3.37   | 4.41   | 7.77   | -28.10 | -35.44 | -31.07 |      |
| 1.68   | 3.78   | 0.58   | 6.76   | 1.73   | 2.41   | 0.14   | 0.63   | 3.19   | 1.52   | 1.43   | 0.17   | -0.78  | -1.87  | 0.63   | -1.83  | 2.23   | 0.91   | 2.32   | 1.21   | 3.28   | 1.39   | 2.31   | 1.96   | 1.05   | 1.95   | 7.97   | 6.37   |      |
| 21.70  | 23.08  | 16.31  | 24.94  | 21.97  | 12.98  | 12.94  | 4.72   | 38.50  | 22.54  | 7.03   | 0.04   | 0.61   | -6.69  | -1.50  | 0.31   | 16.13  | 20.13  | 21.52  | 17.77  | 16.09  | 13.22  | 18.07  | 18.71  | 12.65  | 14.76  | 30.68  | 41.48  |      |
| 1.36   | 4.09   |        |        |        |        |        |        |        |        |        |        |        |        |        |        |        |        |        |        |        |        |        |        |        |        |        |        |      |

|        |        |        |        |        |        |        |        |        |        |        |        |        |        |        |         |        |        |        |        |        |        |        |        |        |        |        |        |      |
|--------|--------|--------|--------|--------|--------|--------|--------|--------|--------|--------|--------|--------|--------|--------|---------|--------|--------|--------|--------|--------|--------|--------|--------|--------|--------|--------|--------|------|
| 5.42   | 7.05   | 0.41   | 4.71   | 3.17   | 1.01   | 3.89   | 3.87   | 2.47   | 2.78   | 1.71   | 2.16   | 4.04   | 4.59   | 3.51   | 0.61    | 3.05   | 2.80   | 1.27   | 2.24   | 2.83   | 3.82   | 3.44   | 3.16   | 1.33   | 4.79   | 6.16   | 4.84   |      |
| 0.44   | 0.93   | 1.24   | 0.48   | 0.16   | 0.12   | 2.11   | -0.10  | -0.35  | 2.03   | 7.76   | 7.94   | 10.34  | 9.00   | 6.99   | 5.59    | 4.28   | 2.83   | 3.29   | 3.30   | 3.33   | 4.44   | 5.72   | 4.46   | 4.57   | -0.06  | -0.36  | -0.26  |      |
| 3.79   | 4.08   | 3.94   | 2.89   | 5.23   | 3.06   | 3.73   | 3.18   | 4.23   | 3.91   | 0.72   | 1.65   | 0.37   | 0.41   | -0.39  | -2.18   | 1.28   | 0.28   | 2.48   | -0.18  | 0.39   | 2.23   | 1.18   | 0.73   | 1.09   | 3.95   | 1.53   | 3.22   |      |
| 23.20  | 25.35  | 15.26  | 35.79  | 19.56  | 20.13  | 14.46  | 21.57  | 19.16  | 19.94  | -10.01 | -7.21  | -7.03  | -8.22  | -8.81  | -16.89  | -8.35  | -7.69  | -5.64  | -10.32 | -8.06  | -5.54  | -7.34  | -8.02  | -10.04 | 22.21  | 33.57  | 33.94  |      |
| 40.99  | 41.72  | 29.50  | 55.43  | 36.65  | 34.48  | 23.50  | 37.69  | 38.24  | 31.29  | -13.67 | -13.29 | -11.30 | -12.33 | -11.61 | -21.79  | -13.99 | -10.86 | -10.16 | -16.28 | -11.91 | -7.13  | -11.56 | -13.00 | -16.91 | 40.44  | 48.58  | 51.10  |      |
| -12.68 | -14.11 | -14.63 | -18.94 | -20.44 | -23.35 | -17.14 | -21.33 | -13.90 | -18.14 | 6.95   | 8.24   | -3.55  | 4.41   | 5.43   | -10.68  | 6.53   | 4.92   | 3.34   | 8.36   | 6.00   | 4.47   | 7.29   | 5.77   | 7.56   | -13.46 | -19.25 | -19.59 |      |
| 2.62   | 4.04   | 2.57   | 7.88   | -3.35  | -2.00  | -12.61 | -2.36  | 3.21   | -2.20  | 1.70   | 1.48   | 1.52   | -0.58  | 0.93   | 0.76    | 1.87   | -0.29  | 0.69   | -0.26  | 0.56   | 1.94   | 1.85   | -0.57  | 0.64   | 4.12   | 3.60   | 4.92   |      |
| 5.35   | 6.35   | 6.49   | 10.34  | 0.49   | 0.70   | -13.70 | -2.68  | 9.50   | -0.55  | 0.92   | 2.01   | 1.89   | -1.40  | 0.77   | -0.03   | 2.77   | 2.81   | 3.76   | 1.67   | 1.64   | 3.50   | 2.71   | 3.01   | 1.43   | 1.74   | 6.28   | 10.49  |      |
| -11.32 | -13.02 | -20.53 | -19.78 | -30.61 | -22.74 | -23.62 | -27.34 | -29.72 | -29.67 | -2.15  | 0.68   | -2.75  | -1.51  | -1.31  | 2.05    | -2.01  | -4.11  | -5.16  | -3.65  | -3.29  | -3.43  | -3.07  | -4.56  | -3.31  | -16.58 | -14.30 | -15.90 |      |
| 0.59   | 2.89   | 1.27   | 2.76   | 2.74   | 1.14   | 2.83   | 2.94   | 0.96   | 3.46   | 0.52   | -1.86  | -3.01  | -3.18  | -2.37  | -1.92   | -0.39  | -1.07  | -1.44  | -1.93  | -0.64  | 0.09   | -0.10  | -0.87  | 0.06   | 1.16   | 2.46   | 1.70   |      |
| -0.43  | 0.86   | 0.26   | 0.81   | -1.07  | 0.03   | -0.39  | 0.31   | -0.61  | 0.88   | 6.92   | 6.99   | 7.21   | 5.65   | 6.16   | 4.45    | 1.62   | 1.15   | 1.53   | 1.24   | 0.86   | 0.86   | 1.23   | 2.12   | 2.04   | -0.12  | 2.50   | 0.18   |      |
| 1.61   | 1.59   | 1.53   | 3.37   | 3.87   | 2.99   | 3.06   | 2.86   | 2.93   | 4.62   | -13.40 | -12.70 | -12.72 | -13.11 | -13.16 | -11.49  | -2.67  | -3.72  | -3.38  | -3.63  | -4.10  | -4.37  | -3.14  | -3.79  | -5.00  | 2.70   | 3.06   | 4.74   |      |
| -16.92 | -7.21  | -2.16  | 4.47   | 0.95   | -2.33  | -0.23  | 3.00   | 1.27   | 5.47   | 0.93   | 2.54   | 0.59   | -1.85  | -0.56  | -1.79   | 0.37   | 0.04   | 0.33   | -0.48  | -0.03  | 0.95   | 0.99   | 0.01   | 0.26   | 2.56   | 4.00   | 3.67   |      |
| 1.66   | 0.76   | 2.08   | 3.08   | 1.76   | 2.17   | 2.84   | 2.36   | 2.40   | 2.77   | 2.41   | 2.33   | 2.26   | 1.02   | 1.50   | 0.72    | 1.70   | 3.32   | 2.05   | 0.65   | 2.21   | 2.41   | 2.25   | 1.63   | 2.50   | 3.66   | 4.91   | 3.62   |      |
| 13.00  | 9.35   | 2.06   | 5.33   | 2.19   | 1.64   | 2.84   | 3.80   | 2.52   | 3.77   | 1.98   | 3.15   | -0.03  | 4.01   | 1.10   | 3.22    | 2.76   | 3.13   | 4.79   | 2.72   | 3.30   | 4.30   | 3.90   | 3.19   | 3.11   | 6.91   | 7.21   | 7.01   |      |
| 1.88   | 2.52   | 2.10   | 2.10   | 1.66   | 1.23   | 1.52   | 1.90   | 1.69   | 2.27   | 3.39   | 3.42   | 2.72   | 1.90   | 3.21   | 2.19    | 2.44   | 2.79   | 3.09   | 2.09   | 3.26   | 2.03   | 2.50   | 3.36   | 3.95   | 3.25   | 3.32   | 0.18   |      |
| 2.50   | 2.15   | 1.72   | 1.94   | 1.53   | 1.07   | 2.39   | 1.29   | 2.02   | 2.62   | 2.88   | 3.59   | 3.22   | 2.78   | 1.63   | 3.48    | 1.93   | 1.62   | 1.59   | 2.43   | 1.48   | 1.36   | 2.67   | 2.47   | 1.55   | 1.10   | 2.17   | 3.24   |      |
| 0.99   | 2.85   | 0.50   | 1.28   | 0.80   | 0.57   | 1.65   | 3.12   | 1.34   | 1.41   | 1.32   | 1.28   | 2.22   | 1.48   | 1.29   | 1.26    | 1.31   | 1.88   | 0.66   | 0.23   | 2.95   | 1.34   | -0.82  | 0.31   | 3.12   | 2.21   | 3.63   | 1.86   |      |
| -0.39  | 0.02   | -3.41  | -1.13  | -2.95  | -3.02  | -6.28  | -4.78  | -3.63  | -2.12  | -1.88  | -0.48  | -0.82  | -1.79  | -1.14  | 0.93    | 0.61   | -0.97  | -1.77  | -1.18  | 0.21   | 0.22   | 0.42   | -1.15  | -0.39  | 0.32   | 0.82   | -0.09  |      |
| -2.27  | -1.93  | -3.68  | -5.50  | -2.82  | -5.10  | -3.65  | -3.01  | -5.25  | -3.43  | 1.02   | 0.61   | -0.69  | -0.76  | 0.49   | -0.44   | 0.66   | 0.23   | 0.46   | 0.59   | 0.70   | 0.39   | 0.21   | 1.03   | 1.03   | -5.29  | -3.08  | -3.33  |      |
| 4.40   | 4.35   | 2.68   | 5.30   | 5.94   | 3.94   | 4.10   | 4.00   | 4.52   | 5.11   | 1.52   | 1.30   | 1.78   | 1.05   | -1.46  | 0.54    | 0.42   | 0.76   | 1.63   | -1.57  | 1.68   | 0.52   | 0.33   | 3.00   | -0.10  | 5.66   | 3.88   | 3.79   |      |
| -1.92  | -2.25  | -6.83  | -6.16  | -4.99  | -4.29  | -3.86  | -5.72  | -7.58  | -6.37  | 5.85   | 5.91   | 6.66   | 5.96   | 6.37   | 5.60    | 5.27   | 4.10   | 3.11   | 4.42   | 2.67   | 3.62   | 3.13   | 3.88   | 4.99   | -4.20  | -1.95  | -3.57  |      |
| 3.01   | 3.28   | 3.03   | 4.52   | 4.26   | 4.00   | 6.81   | 6.32   | 3.35   | 5.58   | -2.06  | -1.03  | -0.78  | -2.13  | -1.22  | -1.49   | -0.74  | -0.08  | -0.84  | -0.37  | 0.30   | -0.32  | 0.50   | -0.37  | -1.57  | 1.67   | 2.95   | 3.17   |      |
| 0.71   | 1.99   | 0.99   | 1.33   | 0.96   | 1.32   | 1.23   | 1.30   | 1.38   | 0.72   | -0.37  | -1.44  | -1.99  | -2.12  | -1.03  | -1.25   | 0.70   | -1.74  | -2.99  | -0.96  | -0.22  | 0.57   | -1.31  | -0.66  | 0.57   | 1.58   | 2.38   | 1.75   |      |
| 4.30   | 5.39   | 7.51   | 12.14  | 3.63   | -2.68  | -7.03  | -0.96  | 14.86  | 3.74   | 0.63   | 0.62   | 0.97   | 1.38   | 0.23   | -0.17   | 1.15   | 0.99   | 3.11   | 0.25   | 2.63   | 1.48   | 2.71   | 0.18   | 1.88   | 7.59   | 7.61   | 8.52   |      |
| 7.28   | 6.23   | 7.60   | 12.02  | 3.93   | -5.06  | -11.89 | -0.70  | 17.35  | 0.61   | 1.49   | 0.97   | 2.18   | 2.62   | 0.91   | 0.90    | 1.54   | 1.83   | 2.85   | 1.28   | 2.26   | 0.56   | 2.15   | 1.91   | 0.63   | 8.61   | 8.03   | 9.45   |      |
| -17.82 | -18.05 | -24.54 | -26.40 | -37.48 | -34.57 | -31.50 | -34.42 | -39.67 | -40.50 | -2.50  | -1.22  | -0.11  | -0.78  | 1.06   | 1.71    | -2.67  | -6.19  | -6.48  | -4.52  | -2.10  | -2.56  | -2.18  | -4.77  | -2.00  | -17.61 | -22.63 | -28.81 |      |
| -4.31  | -1.90  | -8.73  | -14.26 | -7.70  | -7.71  | -1.71  | -4.09  | -11.77 | -9.59  | -5.08  | -2.26  | -4.12  | -1.37  | -0.15  | -1.98   | -5.19  | -7.52  | -3.80  | -4.62  | -5.57  | -4.77  | -4.10  | -5.86  | -5.91  | -4.97  | -7.87  | -7.43  |      |
| -9.38  | -4.54  | -11.83 | -24.05 | -14.86 | -9.39  | -5.41  | -10.77 | -20.16 | -14.43 | 6.54   | -2.62  | -1.54  | 1.57   | -0.15  | -3.00   | -11.86 | -12.94 | -12.90 | -12.39 | -11.22 | -9.72  | -9.44  | -11.33 | -12.77 | -10.24 | -13.46 | -11.84 |      |
| 1.23   | 3.12   | 4.00   | 1.96   | -2.03  | -2.31  | -0.28  | -1.27  | 1.19   | 0.83   | -0.19  | 0.99   | -0.29  | 0.99   | 1.15   | -0.56   | -2.10  | -2.28  | -2.99  | -2.13  | -2.49  | -2.21  | -2.89  | 0.90   | 2.00   | 3.34   | 3.84   |        |      |
| -22.62 | -23.22 | -16.49 | -16.48 | -19.74 | -18.94 | -19.70 | -23.62 | -21.80 | -22.43 | -25.34 | -27.46 | -26.58 | -20.72 | -17.71 | -22.44  | -18.43 | -16.48 | -18.24 | -15.48 | -13.22 | -15.20 | -12.08 | -11.74 | -15.06 | -15.80 | -15.10 | -19.67 |      |
| 2.97   | 2.50   | 1.48   | 1.52   | 2.70   | 2.08   | 1.90   | 1.72   | 2.50   | 3.15   | 1.83   | 4.37   | 1.55   | 1.35   | 1.81   | 2.42    | 1.76   | 1.28   | 1.87   | 1.55   | 1.84   | 1.58   | 0.57   | 1.26   | -0.77  | 2.80   | 2.81   |        |      |
| 3.46   | 5.79   | 0.82   | 3.20   | 3.44   | 0.39   | 1.63   | -0.42  | 3.15   | 4.49   | 1.06   | 3.99   | 2.48   | 0.96   | 1.68   | 3.12    | 1.70   | 1.87   | 0.97   | -0.54  | -0.02  | -0.64  | 0.35   | -1.11  | 2.39   | 0.41   | 3.32   | 4.17   |      |
| -2.33  | 0.46   | -0.88  | 0.25   | 0.68   | 0.57   | 0.08   | 1.67   | -0.76  | 2.00   | -0.13  | 0.30   | 0.03   | -1.05  | 0.23   | -1.38   | 0.66   | -2.90  | -0.70  | -0.76  | -0.07  | -1.18  | 0.97   | -0.11  | -0.79  | -0.43  | 3.17   | 1.03   |      |
| 0.12   | -0.73  | 0.22   | 1.41   | 0.44   | -0.85  | -0.55  | 1.06   | 0.97   | 0.73   | -1.10  | -0.93  | -0.85  | -2.03  | -1.82  | -1.64   | -0.36  | 1.02   | -0.22  | -0.92  | -0.32  | -0.35  | -0.91  | -0.96  | -1.14  | -0.32  | -2.00  | 0.31   |      |
| 0.47   | 1.84   | 0.39   | -0.49  | 0.93   | 2.50   | 1.79   | 0.01   | 0.63   | 1.51   | 0.53   | 0.78   | 0.82   | 0.88   | -1.21  | 1.95    | 1.22   | -0.41  | 0.66   | 0.41   | 0.49   | -0.24  | 1.50   | 1.48   | 1.38   | 1.75   | 2.35   | 3.52   |      |
| 0.78   | 0.34   | -12.31 | -17.24 | -9.91  | -12.20 | -23.91 | -18.37 | -16.94 | -19.51 | -40.65 | -46.25 | -39.76 | -33.90 | -47.14 | -69.42  | -13.44 | -12.75 | -14.76 | -14.27 | -15.08 | -11.60 | -15.31 | -15.55 | -14.99 | -11.13 | -8.11  | 3.68   |      |
| 0.92   | -0.12  | -19.10 | -26.08 | -13.32 | -12.76 | -22.14 | -18.57 | -22.50 | -21.38 | -52.66 | -64.07 | -55.03 | -52.94 | -61.19 | -89.54  | -22.06 | -20.71 | -21.59 | -20.66 | -24.10 | -19.89 | -20.89 | -24.36 | -23.14 | -21.86 | -15.17 | -1.27  |      |
| 0.86   | -0.35  | -27.37 | -39.83 | -22.12 | -15.36 | -23.60 | -23.09 | -30.10 | -27.52 | -71.20 | -86.29 | -76.10 | -72.78 | -79.58 | -106.77 | -32.88 | -31.82 | -33.29 | -32.46 | -34.82 | -30.16 | -31.59 | -35.92 | -34.99 | -30.64 | -20.79 | -5.19  |      |
| 8.03   | 8.57   | 3.59   | 14.41  | 4.88   | -3.44  | -5.12  | -1.72  | 5.74   | -2.08  | -1.06  | -2.04  | -5.31  | -2.57  | -1.83  | -3.04   | -2.12  | -1.67  | -2.62  | -1.68  | -3.16  | -0.22  | -0.42  | -1.94  | -2.79  | 10.86  | 11.34  | 9.21   |      |
| 9.37   | 10.60  | 2.96   | 16.86  | 1.01   | -5.76  | -9.31  | -6.09  | 3.84   | -6.22  | -2.64  | -1.17  | -4.01  | -2.57  | -2.68  | -2.91   | -1.72  | -1.79  | -2.01  | -2.65  | -2.19  | -0.86  | -0.94  | -1.79  | -2.50  | 12.08  | 12.78  | 9.61   |      |
| -22.59 | -25.27 | -25.64 | -40.18 | -30.14 | -28.43 | -22.19 | -25.56 | -26.33 | -27.97 | 8.06   | 12.17  | 5.28   | 6.31   | 7.89   | 12.12   | 8.74   | 7.70   | 5.70   | 9.85   | 7.21   | 6.09   | 5.58   | 6.14   | 10.48  | -30.02 | -31.31 | -27.42 |      |
| 2.38   | 3.82   | 1.52   | 8.95   | 3.41   | 1.36   | 0.81   | 1.49   | 3.39   | 2.87   | 0.75   | 0.55   | -0.75  | -1.14  | 0.06   | -1.62   | 1.89   | 1.26   | 1.10   | -0.39  | -0.15  | 0.19   | 0.64   | 0.63   | -0.34  | 3.88   | 4.45   | 5.84   |      |
| 29.65  | 31.49  | 26.36  | 46.72  | 41.46  | 25.27  | 24.35  | 14.92  | 56.30  | 45.62  | 4.24   | -2.49  | -1.79  | -8.58  | -4.83  | -2.74   | 9.74   | 12.55  | 14.40  | 9.25   | 7.76   | 5.94   | 9.95   | 9.12   | 6.69   | 28.00  | 39.39  | 45.82  |      |
| 1.09   | 0.47   | 3.11   | -1.01  | -0.65  | -1.18  | -0.37  | -8.17  | 0.72   | -0.36  | -2.50  | 1.81   | 1.64   | 3.03   | 0.47   | 1.78    | 0.23   | 0.93   | 0.95   | 2.19   | 1.52   | -1.53  | -0.73  | 1.10   | 2.00   | 0.81   | 0.03   | -2.01  | 0.65 |
| -3.57  | -3.43  | -2.86  | -4.02  | -4.78  | -3.40  | -1.10  | -4.02  | -5.62  | -4.45  | 3.17   | 4.77   | 4.63   | 5.66   | 3.08   | 2.99    | 2.48   | 2.52   | 1.44   | 2.94   | 0.51   | 2.03   | 3.21   | 1.99   | 4.54   | -3.81  | -1.75  | -3.75  |      |
| -4.32  | -3.20  | -3.85  | -6.99  | -5.79  | -3.66  | -1.82  | -3.57  | -5.68  | -4.80  | 3.89   | 3.52   | 3.82   | 2.96   | 2.50   | 3.54    | 2.15   | 0.95   | 0.09   | 1.79   | 0.70   | 1.61   | 1.04   | 2.24   | 1.69   | -6.48  | -3.23  | -5.39  |      |
| -0.75  |        |        |        |        |        |        |        |        |        |        |        |        |        |        |         |        |        |        |        |        |        |        |        |        |        |        |        |      |



|        |        |        |        |        |        |        |        |        |        |        |         |         |        |        |         |        |        |        |        |        |        |        |        |        |        |        |        |
|--------|--------|--------|--------|--------|--------|--------|--------|--------|--------|--------|---------|---------|--------|--------|---------|--------|--------|--------|--------|--------|--------|--------|--------|--------|--------|--------|--------|
| 27.20  | 31.01  | 16.70  | 33.57  | 19.92  | 19.87  | 19.72  | 22.78  | 16.17  | 17.21  | -10.08 | -8.99   | -7.33   | -7.32  | -8.95  | -17.40  | -9.10  | -10.47 | -7.57  | -12.48 | -10.51 | -6.02  | -7.90  | -8.33  | -11.27 | 19.43  | 29.09  | 27.65  |
| 49.33  | 50.63  | 34.06  | 51.65  | 36.18  | 38.19  | 34.37  | 39.99  | 34.03  | 31.73  | -14.51 | -13.68  | -11.12  | -11.98 | -11.31 | -22.06  | -16.63 | -15.10 | -12.62 | -19.05 | -15.36 | -9.15  | -13.58 | -15.58 | -18.17 | 35.19  | 41.14  | 41.53  |
| -15.95 | -16.07 | -16.68 | -19.16 | -20.43 | -25.28 | -20.46 | -23.03 | -12.77 | -17.83 | 8.61   | 8.67    | 2.97    | 5.35   | 5.37   | 10.88   | 8.17   | 8.24   | 6.89   | 10.23  | 7.99   | 4.54   | 7.83   | 6.64   | 8.70   | -11.81 | -11.77 | -14.51 |
| 3.40   | 5.99   | 5.16   | 7.82   | -3.86  | -0.87  | -10.01 | -0.38  | 3.58   | -2.19  | 0.48   | 0.82    | 1.94    | -0.95  | 0.81   | 0.04    | 1.60   | -0.09  | 2.40   | -0.91  | 0.10   | 1.38   | 0.81   | -0.70  | -0.25  | 3.77   | 3.02   | 5.36   |
| 7.95   | 9.13   | 7.73   | 11.05  | 2.29   | 1.19   | -11.26 | 0.82   | 8.81   | 0.15   | 0.80   | 1.94    | 0.75    | -1.34  | 0.81   | 0.18    | 2.89   | 1.64   | 3.13   | 1.16   | 1.20   | 2.99   | 2.03   | 1.77   | 0.88   | 7.48   | 6.13   | 9.37   |
| -17.28 | -17.22 | -23.37 | -2.61  | -34.46 | -30.67 | -33.14 | -33.03 | -29.71 | -34.81 | -2.14  | 0.27    | -1.96   | -1.15  | -1.37  | 1.96    | -1.47  | -2.57  | 2.78   | -2.01  | -1.20  | -2.33  | -1.17  | -2.76  | -2.49  | -15.91 | -12.81 | -14.32 |
| 0.92   | 3.01   | 1.62   | 2.50   | 1.91   | 1.61   | 2.03   | 2.01   | 0.63   | 2.28   | -2.42  | -1.80   | -3.72   | -3.47  | -2.58  | -2.19   | 0.54   | -0.60  | -1.18  | -2.47  | -1.23  | -1.12  | -1.65  | -0.77  | -0.84  | 0.73   | 3.03   | 1.40   |
| 0.07   | 1.13   | 0.74   | 0.23   | 0.51   | 0.39   | -0.47  | -0.22  | -0.52  | -0.15  | 8.08   | 6.95    | 7.77    | 6.35   | 6.92   | 7.56    | 2.32   | 2.19   | 1.81   | 2.08   | 2.41   | 1.94   | 1.96   | 2.64   | 3.29   | -0.38  | 2.50   | 0.10   |
| 1.04   | 2.12   | 1.26   | 3.33   | 1.94   | 1.33   | 3.07   | 2.26   | 3.46   | 3.96   | -15.03 | -13.94  | -14.86  | -12.81 | -14.48 | -12.72  | -4.54  | -5.21  | -4.22  | -4.19  | -6.43  | -5.55  | -3.86  | -4.66  | -6.69  | 3.25   | 2.49   | 4.66   |
| -16.83 | -6.47  | -1.10  | 3.66   | 0.95   | -3.02  | -0.64  | 2.84   | 1.35   | 4.59   | 0.39   | 3.14    | 1.31    | -2.39  | -0.30  | 0.86    | 0.96   | -0.48  | 0.27   | -1.25  | 0.30   | 0.59   | 0.50   | 0.04   | 0.73   | 2.63   | 5.55   | 3.34   |
| 1.38   | 0.93   | 2.61   | 3.16   | 1.83   | 1.67   | 2.27   | 1.93   | 1.57   | 2.83   | 2.18   | 2.65    | 1.41    | 1.28   | 0.54   | 1.77    | 0.82   | 2.53   | 1.87   | 1.17   | 2.17   | 2.51   | 2.40   | 1.68   | 2.51   | 3.60   | 4.05   | 4.10   |
| 14.00  | 11.00  | 1.44   | 4.66   | 2.83   | 0.86   | 3.25   | 4.83   | 1.19   | 3.78   | 1.89   | 2.88    | -0.33   | 3.59   | 0.30   | 3.08    | 1.57   | 2.85   | 4.29   | 2.66   | 3.72   | 3.76   | 4.36   | 2.41   | 2.93   | 7.42   | 8.24   | 6.62   |
| 2.00   | 2.45   | 2.26   | 1.30   | 2.53   | 1.44   | 1.65   | 1.74   | 1.80   | 1.19   | 3.23   | 3.81    | 2.99    | 1.83   | 3.73   | 2.39    | 3.42   | 2.88   | 2.77   | 3.07   | 3.12   | 2.21   | 2.71   | 3.61   | 2.30   | 2.61   | 1.29   | 2.61   |
| 2.43   | 2.06   | 2.17   | 1.73   | 1.52   | 0.70   | 2.37   | 1.23   | 1.24   | 2.72   | 2.83   | 3.39    | 3.13    | 3.02   | 1.76   | 3.59    | 3.00   | 1.70   | 1.45   | 2.41   | 2.36   | 1.81   | 3.00   | 2.74   | 1.93   | 1.60   | 3.11   | 2.98   |
| 1.19   | 2.45   | 0.72   | 1.50   | 0.46   | 0.96   | 2.43   | 1.35   | 1.52   | 0.78   | 1.54   | 1.63    | 2.40    | 1.03   | 1.28   | 1.35    | 2.08   | 2.04   | 0.84   | 0.89   | 2.54   | 1.90   | -0.11  | 0.59   | 2.30   | 1.03   | 3.44   | 2.58   |
| 0.24   | -0.11  | -1.51  | 0.64   | -2.78  | -3.68  | -6.94  | -3.28  | -1.94  | -2.13  | 1.54   | -1.06   | -0.78   | -0.78  | -1.21  | -0.65   | -0.74  | -0.52  | 1.90   | -0.42  | 0.57   | 0.18   | 0.72   | -0.77  | -0.71  | -0.43  | 0.56   | 1.04   |
| -3.58  | -4.36  | -3.68  | -6.18  | -3.28  | -4.41  | -5.07  | -3.44  | -3.64  | -3.26  | 0.11   | 1.44    | -0.87   | -0.61  | -0.28  | 1.05    | 0.88   | 0.12   | 0.05   | 0.27   | 0.28   | 0.99   | -0.01  | 0.80   | 0.90   | -3.41  | -0.49  | -1.91  |
| 5.16   | 6.74   | 4.14   | 5.13   | 4.66   | 4.53   | 3.05   | 5.22   | 4.32   | 3.78   | 0.37   | 0.70    | 1.07    | 1.00   | -1.19  | 0.32    | -0.09  | 1.45   | -1.79  | -0.95  | 1.90   | -0.92  | 0.16   | 0.30   | 0.34   | 4.72   | 3.12   | 2.66   |
| -2.68  | -4.25  | -6.31  | -5.83  | -5.59  | -6.14  | -6.08  | -5.55  | -7.94  | -6.26  | 7.54   | 7.71    | 7.04    | 5.63   | 6.68   | 8.71    | 6.48   | 5.87   | 4.32   | 4.94   | 3.88   | 4.14   | 3.75   | 5.54   | 6.14   | -4.80  | -3.05  | -2.75  |
| 3.29   | 4.08   | 4.39   | 4.32   | 5.16   | 4.29   | 7.06   | 6.19   | 3.27   | 5.08   | -2.21  | -1.62   | -0.40   | -1.83  | -0.86  | -2.03   | -0.94  | -0.66  | -0.39  | -1.12  | -0.25  | -0.06  | -0.08  | -0.73  | -1.88  | 2.52   | 3.25   | 2.20   |
| 1.98   | 2.94   | 1.57   | 2.42   | 0.15   | 0.99   | 0.44   | 2.00   | 0.57   | -0.64  | -1.48  | -1.80   | -1.86   | -2.08  | -1.31  | -1.58   | -0.55  | -1.35  | -1.66  | -0.85  | -0.97  | 0.90   | -1.61  | -0.45  | 0.24   | 2.48   | 2.84   | 1.54   |
| 8.33   | 9.98   | 9.91   | 12.08  | 7.26   | 5.54   | -5.30  | 4.39   | 15.91  | 6.39   | 0.97   | 0.61    | 0.45    | -2.01  | 0.44   | 1.22    | 1.08   | -0.37  | 1.09   | -0.44  | 1.67   | 0.33   | 2.43   | -0.08  | 1.51   | 7.96   | 5.65   | 8.78   |
| 9.08   | 9.88   | 11.08  | 13.23  | 6.91   | -3.47  | -12.02 | 3.63   | 17.82  | 2.71   | 0.54   | 0.60    | 1.35    | 0.22   | 0.48   | 0.85    | 0.92   | 0.68   | 1.97   | 0.79   | 2.03   | 1.01   | 1.59   | 0.76   | -0.05  | 9.72   | 7.76   | 8.77   |
| -24.73 | -26.65 | -32.26 | -28.64 | -43.14 | -43.75 | -45.80 | -43.06 | -39.92 | -47.71 | -1.72  | 0.61    | -0.43   | 1.63   | 1.64   | 0.89    | -3.76  | -3.49  | -2.14  | -0.62  | 0.77   | 0.40   | -0.84  | -0.06  | -9.92  | -21.07 | -27.59 | -27.59 |
| -8.39  | -4.64  | -11.62 | -17.22 | -10.92 | -11.68 | -5.79  | -8.59  | -15.28 | -12.12 | -4.64  | -1.16   | -2.36   | -0.58  | -0.22  | -0.72   | -4.57  | -5.71  | -6.82  | -3.69  | -6.23  | -3.50  | -3.99  | -4.17  | -4.92  | -8.14  | -8.34  | -6.81  |
| -15.94 | -10.20 | -15.80 | -29.51 | -21.19 | -16.12 | -11.62 | -17.88 | -23.29 | -20.19 | -4.58  | -1.32   | -0.17   | 2.84   | 1.18   | -1.04   | -9.92  | -10.98 | -10.87 | -9.67  | -7.87  | -7.60  | -7.58  | -9.39  | -10.12 | -14.37 | -12.83 | -13.29 |
| 0.80   | 0.71   | -3.30  | 0.23   | -1.74  | -4.39  | -5.72  | -2.53  | -2.19  | -2.56  | 0.29   | 1.68    | 2.17    | 0.41   | 2.45   | -0.06   | 0.23   | -0.99  | 0.93   | -1.23  | -3.18  | -1.76  | 0.63   | -1.70  | 0.03   | 2.76   | 3.45   | 2.19   |
| -23.86 | -25.06 | -17.41 | -19.10 | -21.83 | -21.05 | -21.18 | -24.92 | -23.20 | -25.78 | -27.67 | -28.84  | -28.70  | -22.08 | -19.21 | -23.08  | -19.84 | -18.69 | -19.94 | -18.94 | -15.69 | -17.11 | -14.58 | -14.65 | -17.76 | -17.52 | -16.42 | -21.69 |
| 2.65   | 2.65   | 1.76   | 2.76   | 2.61   | 2.11   | 1.44   | 1.94   | 1.72   | 3.17   | 2.80   | 3.74    | 1.70    | 1.27   | 2.07   | 2.44    | 1.89   | 1.36   | 0.65   | 1.31   | 1.59   | 1.22   | 1.21   | -0.49  | 1.94   | 0.01   | 3.04   | 3.41   |
| 4.75   | 7.06   | 2.26   | 3.44   | 3.28   | 0.48   | 1.57   | 0.72   | 3.04   | 5.27   | 3.50   | 4.30    | 2.76    | 2.45   | 0.82   | 2.31    | 1.92   | 1.80   | 1.32   | 1.79   | 0.99   | 1.96   | 1.09   | 0.01   | 2.06   | 0.87   | 5.45   | 4.68   |
| -0.67  | -0.13  | 0.01   | -0.49  | 1.01   | -1.43  | -1.35  | 0.17   | -1.01  | 1.27   | -0.21  | 0.35    | -0.27   | -0.87  | 0.27   | -1.01   | -0.34  | -2.71  | -1.62  | -0.04  | 0.49   | -0.32  | 1.06   | -0.17  | -1.29  | -0.25  | 1.50   | 0.31   |
| -0.41  | 0.09   | 0.63   | 1.17   | 0.68   | -0.90  | -0.03  | 0.87   | 0.85   | 0.62   | -1.44  | -1.81   | -1.90   | -3.36  | -1.90  | -1.49   | -0.67  | -0.14  | -0.61  | -1.49  | -0.31  | -0.06  | -0.88  | -0.79  | -1.87  | -0.85  | 0.67   | 0.17   |
| 1.68   | 2.20   | 1.27   | -0.06  | 0.90   | 2.61   | 1.29   | 3.39   | 0.46   | 1.33   | 0.37   | 1.52    | 1.23    | 2.20   | -0.90  | 1.56    | 0.68   | 0.52   | 0.61   | 0.08   | 0.49   | -0.99  | 0.87   | 0.58   | 2.88   | 1.98   | 2.54   | 3.81   |
| 2.11   | 0.14   | -13.06 | -18.68 | -9.31  | -12.19 | -21.52 | -19.59 | -17.35 | -20.63 | -67.98 | -70.66  | -66.30  | -52.20 | -69.60 | -93.51  | -16.83 | -13.51 | -14.38 | -16.17 | -14.95 | -12.99 | -16.14 | -17.41 | -25.28 | -13.81 | -9.44  | 4.31   |
| 3.27   | -0.02  | -18.25 | -29.54 | -14.92 | -12.69 | -21.03 | -19.95 | -22.79 | -22.97 | -79.42 | -90.63  | -80.34  | -72.01 | -83.10 | -110.33 | -24.43 | -21.44 | -20.99 | -22.99 | -25.20 | -20.93 | -23.46 | -27.55 | -38.00 | -22.51 | -16.00 | -0.98  |
| 2.50   | -0.61  | -21.60 | -42.92 | -22.52 | -15.34 | -23.09 | -26.19 | -32.88 | -30.15 | -97.40 | -108.43 | -103.98 | -87.29 | -98.70 | -122.61 | -36.10 | -32.61 | -32.34 | -36.43 | -36.24 | -31.76 | -34.74 | -40.43 | -56.48 | -30.61 | -23.37 | -5.11  |
| 10.86  | 12.39  | 4.20   | 14.54  | 5.68   | -3.70  | -4.10  | -0.17  | 4.97   | -4.17  | -1.17  | -1.81   | -4.95   | -2.48  | -1.74  | -2.63   | -3.54  | -2.22  | -2.43  | -2.05  | -3.27  | -1.80  | -0.43  | -2.39  | -2.14  | 8.21   | 8.31   | 6.59   |
| 12.32  | 13.59  | 4.51   | 15.91  | 1.83   | -5.79  | -8.56  | -4.93  | 2.14   | -5.85  | -2.46  | -1.21   | -3.50   | -2.64  | -2.48  | -2.91   | -1.54  | -2.73  | -2.32  | -3.40  | -2.50  | -0.18  | -1.74  | -2.30  | -2.97  | 8.84   | 8.95   | 6.87   |
| -29.78 | -31.83 | -29.17 | -37.97 | -31.01 | -29.82 | -26.78 | -26.19 | -22.66 | -27.77 | 8.66   | 12.61   | 7.23    | 6.67   | 8.62   | 12.03   | 11.96  | 11.62  | 8.22   | 11.61  | 7.99   | 5.70   | 8.51   | 9.33   | 10.14  | -24.79 | -24.05 | -20.91 |
| 3.03   | 5.06   | 3.31   | 10.52  | 2.78   | 2.77   | -0.09  | 2.94   | 2.12   | 3.40   | -0.58  | -0.64   | -2.28   | -2.10  | -0.07  | -1.78   | 1.52   | 0.54   | 0.06   | -0.77  | 0.50   | -0.66  | 0.97   | 0.99   | -1.09  | 4.87   | 8.79   | 6.54   |
| 45.00  | 46.42  | 40.26  | 58.22  | 56.46  | 42.85  | 46.19  | 36.96  | 55.86  | 56.23  | 0.91   | -0.74   | -3.78   | -9.90  | -7.19  | -5.86   | 6.40   | 5.99   | 7.90   | 4.30   | 2.03   | 1.48   | 4.45   | 5.10   | 3.20   | 34.58  | 38.01  | 44.79  |
| 0.20   | 0.60   | 3.92   | -2.33  | -1.59  | 0.48   | -9.09  | 1.13   | -1.01  | -3.06  | 0.41   | 0.12    | 2.91    | -0.11  | 1.98   | 0.73    | 0.43   | 0.40   | 1.52   | 0.50   | -2.52  | -1.55  | 0.55   | 0.10   | -0.44  | 0.55   | -1.14  | 1.11   |
| -4.93  | -4.81  | -6.66  | -4.65  | -5.55  | -4.21  | -4.41  | -6.10  | -5.70  | -6.15  | 3.73   | 4.37    | 4.71    | 4.67   | 3.86   | 2.51    | 2.62   | 5.59   | 3.73   | 3.44   | 1.84   | 4.24   | 4.13   | 2.97   | 4.38   | -3.68  | -1.95  | -2.32  |
| -5.79  | -5.10  | -4.40  | -6.65  | -7.00  | -5.79  | -3.16  | -5.43  | -5.97  | -5.91  | 4.42   | 4.00    | 3.84    | 3.69   | 3.18   | 3.99    | 3.68   | 0.63   | 1.26   | 2.67   | 1.96   | 3.20   | 1.76   | 3.14   | 2.06   | -6.07  | -1.80  | -4.54  |
| -1.72  | -0.52  | -3.16  | -1.14  | -1.05  | -2.46  | -0.82  | -1.28  | -3.12  | -1.50  | 1.36   | 3.00    | 1.38    | 1.58   | 1.66   | 1.41    | 1.15   | 2.71   | 0.44   | 1.77   | 1.85   | 1.72   | 0.24   | 0.75   | 2.52   | -1.97  | 0.34   | -0.07  |
| 5.89   | 7.74   | 4.23   | 6.30   | 5.79   | 4.99   | 8.82   | 8.73   | 4.93   | 8.47   | -10.83 | -9.39   | -13.62  | -10.61 | -8.03  | -10.33  | -6.25  | -2.53  | -4.75  | -3.37  | -3.74  | -6.33  | -4.89  | -4.66  | -4.48  | 3.53   | 2.99   | 7.64   |
| 10.76  | 11.68  | 9.30   | 7.15   | 8.44   | 13.55  | 15.66  | 19.53  | 11.99  | 17.76  | -24.05 | -19.77  | -24.79  | -22.79 | -15.53 | -21.70  | -11.37 | -5.38  | -9.76  | -11.81 | -10.78 | -11.34 | -8.70  | -7.87  | -10.61 | 9.5    |        |        |

|        |        |        |        |        |        |        |        |        |        |         |         |         |        |         |         |        |        |        |        |        |        |        |        |        |        |        |        |
|--------|--------|--------|--------|--------|--------|--------|--------|--------|--------|---------|---------|---------|--------|---------|---------|--------|--------|--------|--------|--------|--------|--------|--------|--------|--------|--------|--------|
| 3.90   | 5.96   | 2.76   | 6.86   | -3.34  | -0.20  | -9.66  | 0.62   | 3.46   | -2.39  | 0.38    | 1.23    | 1.73    | 0.05   | 0.77    | -0.31   | 0.64   | -0.79  | 0.37   | -1.22  | -0.37  | 1.17   | 1.23   | 0.28   | 0.32   | 4.20   | 2.15   | 3.24   |
| 9.13   | 9.84   | 7.72   | 9.97   | 0.97   | 1.86   | -9.49  | 1.33   | 6.85   | -0.64  | 0.41    | 0.94    | -0.37   | -0.54  | 0.51    | -0.35   | 1.45   | 0.78   | 2.11   | -0.39  | 0.28   | 2.21   | 1.19   | 0.70   | 0.17   | 7.39   | 5.27   | 7.81   |
| -20.19 | -21.95 | -24.17 | -17.56 | -30.64 | -29.94 | -40.46 | -30.83 | -25.12 | -30.38 | 0.33    | 1.50    | -2.75   | 0.06   | -0.57   | 1.77    | 0.71   | -0.46  | -1.94  | -1.56  | -1.07  | 0.19   | -0.19  | -1.68  | -0.79  | -14.12 | -12.13 | -15.65 |
| 1.81   | 2.50   | 1.48   | 3.19   | 2.87   | 0.48   | 2.78   | 2.00   | 0.20   | 3.19   | -2.40   | -3.34   | -4.24   | -3.66  | -2.28   | -3.50   | -0.15  | -0.18  | -2.16  | -2.78  | -1.00  | -1.66  | -1.52  | -1.22  | -1.38  | 0.68   | 2.77   | 1.05   |
| -1.38  | 0.88   | 0.87   | 0.72   | 0.06   | 0.35   | -0.16  | 0.20   | -0.68  | 1.31   | 8.09    | 7.81    | 8.18    | 6.31   | 6.78    | 7.29    | 3.08   | 2.68   | 2.45   | 3.57   | 2.99   | 2.96   | 2.46   | 2.95   | 3.61   | -0.33  | 2.14   | 0.59   |
| 1.48   | 1.47   | 1.49   | 3.10   | 3.03   | 2.54   | 2.35   | 0.59   | 2.01   | 4.66   | -15.33  | -14.13  | -14.53  | -13.80 | -13.81  | -13.61  | -7.32  | -5.70  | -5.65  | -5.15  | -7.64  | -7.08  | -5.18  | -6.93  | -6.50  | 2.28   | 2.36   | 4.40   |
| -17.66 | -7.11  | -2.24  | 4.99   | 0.51   | -3.38  | -0.39  | 3.17   | 2.22   | 5.25   | 0.46    | 1.79    | 0.20    | -2.58  | -1.15   | 0.17    | 1.12   | -0.90  | 0.14   | -1.60  | 0.61   | -0.20  | 1.45   | 0.20   | 0.47   | 3.32   | 3.24   | 3.55   |
| 1.67   | 1.49   | 2.90   | 3.79   | 2.09   | 2.78   | 2.39   | 1.54   | 0.94   | 4.28   | 2.20    | 2.62    | 1.59    | 1.36   | 0.86    | 1.80    | 1.42   | 2.61   | 1.18   | 1.62   | 2.72   | 2.97   | 2.00   | 1.74   | 2.07   | 3.79   | 4.64   | 3.36   |
| 13.59  | 10.90  | 2.06   | 5.46   | 2.65   | 1.50   | 3.74   | 5.03   | 1.59   | 3.84   | 1.36    | 2.37    | -0.24   | 3.17   | 0.05    | 1.91    | 2.50   | 2.77   | 3.48   | 0.72   | 1.57   | 3.83   | 4.24   | 1.07   | 3.01   | 7.19   | 7.93   | 7.11   |
| 1.61   | 2.36   | 1.77   | 2.38   | 2.42   | 1.49   | 1.48   | 1.54   | 2.19   | 2.29   | 2.75    | 3.95    | 3.50    | 2.12   | 3.98    | 2.41    | 3.69   | 4.32   | 3.95   | 2.90   | 3.80   | 2.83   | 3.20   | 4.15   | 3.41   | 1.90   | 2.93   | 1.09   |
| 2.47   | 1.35   | 1.79   | 2.17   | 1.82   | 0.95   | 1.50   | 2.14   | 1.98   | 3.16   | 3.60    | 3.86    | 3.50    | 3.28   | 2.30    | 2.98    | 1.66   | 2.29   | 1.50   | 2.69   | 2.49   | 2.16   | 2.90   | 3.13   | 1.63   | 2.14   | 3.42   | 3.77   |
| 1.55   | 1.79   | 1.14   | 1.34   | 0.59   | 1.68   | 2.79   | 3.74   | 0.52   | 2.00   | 1.03    | 1.58    | 1.83    | 1.66   | 1.30    | 1.32    | 1.85   | 2.81   | 0.50   | 1.15   | 1.81   | 1.19   | 0.65   | -0.52  | 2.87   | 2.07   | 2.41   | 2.32   |
| 0.46   | 0.53   | -1.74  | 0.69   | -3.54  | -4.40  | -7.29  | -3.35  | -2.37  | -0.98  | -2.17   | -1.57   | -0.55   | -2.65  | -1.14   | -1.00   | 0.32   | 0.20   | -0.27  | -1.20  | 0.58   | 0.33   | 0.67   | -0.83  | 0.40   | 0.59   | 0.90   | 0.28   |
| -6.56  | -4.92  | -3.85  | -1.45  | -1.35  | -2.38  | -5.10  | -1.49  | -2.71  | -0.39  | 0.34    | 1.38    | -1.21   | 0.14   | 0.51    | 0.43    | 0.37   | 0.10   | -0.04  | 0.50   | 0.64   | 0.77   | 0.43   | 0.26   | 0.12   | -1.54  | -0.08  | -0.48  |
| 5.37   | 6.06   | 3.61   | 3.46   | 2.95   | 4.99   | 6.09   | 5.14   | 4.30   | 3.97   | 0.69    | 0.33    | 2.59    | -0.21  | -0.75   | -0.88   | -0.26  | 0.94   | -0.77  | -2.12  | -0.01  | -0.83  | -0.54  | -0.71  | -1.41  | 3.93   | 2.72   | 3.28   |
| -4.66  | -4.61  | -6.27  | -4.90  | -4.34  | -4.81  | -6.47  | -4.17  | -6.69  | -4.58  | 7.04    | 7.23    | 7.57    | 5.96   | 6.69    | 7.03    | 6.61   | 6.14   | 5.63   | 5.58   | 3.41   | 4.72   | 4.14   | 6.23   | 5.95   | -2.11  | -0.28  | -1.45  |
| 3.51   | 3.70   | 3.95   | 4.75   | 5.18   | 4.31   | 6.96   | 6.12   | 2.36   | 5.43   | -2.38   | -1.04   | -0.65   | -1.92  | -0.61   | -1.37   | -1.11  | -0.03  | -0.62  | -1.05  | 0.39   | 0.08   | 0.11   | -1.21  | -1.41  | 1.96   | 3.13   | 2.95   |
| 2.38   | 2.66   | 1.40   | 1.81   | -0.22  | -1.12  | 1.16   | 1.88   | 1.07   | 0.19   | -1.69   | -0.81   | -2.33   | -1.87  | -3.69   | -1.43   | 0.96   | -1.10  | -1.26  | -0.30  | -1.86  | 0.32   | -1.66  | -0.85  | -0.08  | 0.96   | 2.33   | 0.99   |
| 11.22  | 11.86  | 11.08  | 11.91  | 6.62   | 1.23   | 0.58   | 2.61   | 14.05  | 5.62   | 0.08    | -0.51   | -0.71   | -0.51  | 0.08    | 0.77    | 0.07   | -0.91  | 0.33   | -1.24  | 1.34   | -0.23  | 2.24   | -0.88  | 0.80   | 7.62   | 6.25   | 7.70   |
| 11.97  | 13.59  | 12.31  | 12.02  | 5.70   | -2.56  | -10.56 | 3.19   | 14.88  | 0.82   | 0.40    | 0.22    | 1.37    | 0.36   | 0.78    | 0.17    | -0.16  | -0.88  | 1.10   | 0.37   | 0.38   | 0.37   | 1.43   | 0.57   | -0.23  | 9.47   | 7.48   | 7.86   |
| -30.59 | -30.99 | -34.50 | -25.27 | -41.76 | -45.70 | -57.72 | -43.84 | -37.70 | -43.22 | -0.43   | 0.57    | 0.13    | 1.93   | 1.12    | 0.70    | 0.79   | -0.91  | -1.86  | -1.98  | 1.27   | 1.68   | 1.43   | 0.54   | -0.35  | -21.46 | -17.76 | -27.39 |
| -10.76 | -9.94  | -12.92 | -14.46 | -11.30 | -13.77 | -10.10 | -11.04 | -13.70 | -12.91 | -2.88   | -2.00   | -1.65   | 0.47   | 0.79    | -1.27   | -4.52  | -4.31  | -5.98  | -2.95  | -4.52  | -3.00  | -3.40  | -4.44  | -3.68  | -8.87  | -7.26  | -7.48  |
| -21.02 | -16.92 | -17.46 | -30.17 | -22.42 | -22.92 | -19.84 | -20.71 | -22.34 | -19.66 | -2.48   | 0.03    | 0.89    | 3.59   | 2.69    | 1.14    | -7.74  | -8.44  | -9.16  | -8.13  | -6.24  | -5.10  | -5.01  | -7.19  | -7.59  | -16.00 | -12.96 | -12.16 |
| -0.08  | 0.50   | -3.36  | 0.48   | -4.30  | -5.06  | -6.97  | -5.02  | -0.32  | -1.96  | -1.12   | 1.10    | 0.61    | 0.63   | 0.25    | 0.99    | -2.91  | -1.37  | 0.19   | -1.34  | -1.22  | -1.90  | 0.87   | -1.54  | -0.87  | -0.18  | 2.79   | 2.62   |
| -26.26 | -27.52 | -19.83 | -20.03 | -24.06 | -23.13 | -22.68 | -26.77 | -25.98 | -26.46 | -29.49  | -30.51  | -29.86  | -23.86 | -20.54  | -25.61  | -19.90 | -20.35 | -21.53 | -20.12 | -17.51 | -18.90 | -16.27 | -15.47 | -18.21 | -18.29 | -18.75 | -23.41 |
| 2.70   | 3.68   | 1.92   | 3.04   | 3.36   | 2.69   | 1.52   | 2.28   | 2.45   | 3.63   | 3.17    | 4.10    | 2.35    | 1.75   | 2.53    | 3.21    | 2.50   | 1.76   | 0.56   | 1.43   | 2.55   | 1.43   | 1.59   | 0.75   | 1.48   | -0.26  | 2.86   | 3.36   |
| 5.10   | 6.92   | 1.09   | 4.64   | 4.05   | 1.29   | 1.48   | 1.54   | 3.77   | 6.60   | 3.05    | 3.58    | 2.57    | 2.47   | 1.21    | 2.92    | 3.56   | 3.63   | 3.08   | 3.06   | 0.71   | 3.10   | 1.21   | 1.10   | 2.50   | 0.92   | 5.72   | 6.20   |
| -1.56  | 0.56   | -0.44  | 0.27   | 1.15   | -0.07  | -0.22  | 2.11   | 0.15   | 2.37   | -0.07   | 0.46    | -0.13   | -1.32  | 0.00    | -1.73   | 0.27   | -1.73  | -0.56  | 0.30   | -0.27  | 0.46   | 0.74   | -0.01  | -0.94  | 0.07   | 2.02   | 1.11   |
| 0.41   | -0.41  | 0.60   | 1.33   | 0.94   | -1.04  | 0.00   | 1.11   | 0.46   | 1.43   | -1.77   | -2.28   | -1.82   | -2.81  | -1.83   | -1.49   | -0.36  | -0.21  | -0.59  | -1.47  | -0.27  | -0.39  | -1.03  | -1.21  | -0.85  | -0.62  | -0.67  | 0.07   |
| 0.79   | 1.75   | 1.02   | 1.33   | 1.20   | 3.63   | 1.77   | 4.39   | 0.59   | 1.66   | 0.44    | 1.46    | 1.50    | 1.24   | -1.24   | 1.92    | -0.37  | 0.11   | 0.30   | 0.12   | 0.05   | -1.17  | 0.64   | 1.11   | 0.39   | 2.18   | 1.78   | 2.91   |
| 1.57   | 0.01   | -14.38 | -20.68 | -11.50 | -12.48 | -4.95  | -19.50 | -19.92 | -21.83 | -86.56  | -89.63  | -85.51  | -67.46 | -83.48  | -110.43 | -25.50 | -16.65 | -16.66 | -28.66 | -21.32 | -17.70 | -26.22 | -27.57 | -49.94 | -14.71 | -12.01 | 2.23   |
| 1.58   | -0.53  | -18.96 | -30.99 | -17.28 | -15.17 | -10.10 | -20.83 | -26.84 | -23.96 | -98.01  | -108.01 | -100.58 | -85.26 | -95.28  | -123.21 | -36.24 | -26.69 | -25.97 | -38.23 | -35.72 | -31.21 | -35.34 | -41.45 | -66.97 | -14.21 | -21.19 | -4.51  |
| 0.78   | -1.16  | -23.33 | -45.17 | -25.70 | -16.85 | -22.46 | -27.79 | -37.73 | -30.77 | -112.21 | -120.16 | -117.51 | -98.46 | -108.97 | -130.86 | -53.90 | -39.41 | -39.06 | -58.64 | -49.65 | -46.30 | -51.74 | -59.99 | -87.14 | -33.08 | -28.53 | -10.55 |
| 13.23  | 13.31  | 4.30   | 9.19   | 4.31   | -5.13  | -4.64  | -3.14  | 2.97   | -5.72  | -1.05   | -1.54   | -2.44   | -2.02  | -1.52   | -2.90   | -3.03  | -2.91  | -3.76  | -1.92  | -3.66  | -1.79  | -0.93  | -1.92  | -2.19  | 6.49   | 6.51   | 5.82   |
| 15.54  | 14.71  | 4.00   | 10.80  | -0.07  | -6.61  | -8.41  | -6.86  | 0.94   | -9.11  | -2.81   | -1.38   | -3.97   | -2.02  | -2.10   | -3.16   | -2.32  | -2.04  | -2.69  | -3.48  | -2.94  | -0.62  | -2.08  | -3.20  | -3.10  | 7.59   | 7.74   | 6.33   |
| -35.25 | -33.08 | -27.27 | -26.71 | -24.96 | -23.79 | -27.97 | -23.63 | -17.85 | -19.94 | 8.96    | 13.03   | 5.38    | 7.18   | 8.75    | 12.99   | 12.34  | 11.72  | 10.17  | 11.63  | 10.26  | 7.88   | 7.63   | 8.59   | 10.52  | -20.36 | -22.77 | -18.33 |
| 2.88   | 5.77   | 2.61   | 10.43  | 2.27   | 4.26   | 2.26   | 1.84   | 4.04   | 4.17   | -0.37   | -1.28   | -2.58   | -2.02  | -1.07   | -2.79   | 1.92   | 0.20   | -0.26  | -1.17  | 0.25   | -1.26  | 0.86   | -1.19  | -0.47  | 5.20   | 8.16   | 6.01   |
| 51.73  | 54.07  | 47.14  | 55.60  | 56.18  | 48.57  | 65.47  | 44.43  | 52.41  | 53.17  | -1.62   | -6.01   | -6.01   | -10.79 | -8.94   | -6.06   | 1.35   | 0.03   | 0.39   | -0.09  | -3.22  | -2.04  | 2.60   | -0.05  | -2.13  | 36.13  | 36.61  | 43.26  |
| 0.31   | -0.02  | 2.66   | -0.78  | -0.41  | 1.19   | -10.53 | -0.74  | -0.10  | -1.51  | 0.59    | 0.77    | 2.78    | -0.11  | 0.57    | 1.82    | -2.32  | -1.52  | -0.31  | -0.10  | -2.79  | -2.65  | 0.77   | -0.73  | 0.14   | 0.01   | -1.36  | 1.03   |
| -4.94  | -5.48  | -4.66  | -3.79  | -4.03  | -4.22  | -7.67  | -6.11  | -4.75  | -3.83  | 4.55    | 4.86    | 5.70    | 4.82   | 3.78    | 2.78    | 3.68   | 4.16   | 4.85   | 4.70   | 2.48   | 4.46   | 4.62   | 3.33   | 5.34   | -3.00  | -1.95  | -2.34  |
| -7.34  | -5.93  | -4.94  | -5.47  | -5.41  | -5.25  | -5.82  | -5.32  | -4.85  | -4.23  | 5.14    | 4.20    | 4.12    | 3.89   | 3.28    | 4.28    | 4.39   | 2.97   | 2.01   | 2.83   | 2.43   | 3.10   | 2.64   | 3.28   | 2.83   | -4.79  | -1.50  | -3.61  |
| -1.81  | -0.57  | -3.60  | -2.59  | -1.83  | -1.76  | -1.76  | -1.34  | -1.91  | -1.11  | 1.92    | 2.50    | 1.08    | 1.19   | 1.79    | 0.31    | 1.79   | 2.79   | 1.17   | 1.41   | 2.33   | 2.63   | 0.19   | 1.00   | 2.86   | -1.75  | -0.74  | -0.70  |
| 5.88   | 6.57   | 3.62   | 6.17   | 6.96   | 5.35   | 7.68   | -11.10 | -9.77  | -12.22 | -10.75  | -9.21   | -10.76  | -7.68  | -3.44   | -5.84   | -4.80  | -5.53  | -7.28  | -5.90  | -4.87  | -5.21  | 3.57   | 6.64   | 8.02   |        |        |        |
| 9.70   | 12.16  | 9.08   | 7.64   | 9.66   | 14.04  | 16.86  | 19.07  | 12.37  | 19.72  | -25.34  | -21.40  | -26.97  | -24.13 | -16.48  | -22.34  | -13.75 | -6.54  | -12.14 | -13.64 | -12.59 | -13.61 | -10.53 | -9.40  | -13.08 | 10.57  | 8.86   | 10.19  |
| -1.34  | -2.18  | -3.02  | 0.01   | -3.72  | -10.76 | -14.29 | -13.08 | -6.99  | -13.11 | 7.57    | 5.96    | 7.82    | 7.31   | 2.63    | 3.64    | 5.35   | 2.69   | 3.42   | 5.19   | 3.58   | 3.23   | 3.16   | 2.94   | 3.16   | -3.19  | -0.90  | 0.51   |
| 2.12   | 0.19   | -0.05  | 3.54   | 0.66   | 1.11   | -0.74  | 2.12   | 1.67   | 1.26   | -3.37   | -3.19   | -2.09   | -3.33  | -3.74   | -6.37   | -0.69  | -1.50  | 0.61   | 0.66   | 2.66   | -0.23  | -0.41  | -1.11  | -1.04  | -1.18  | 1.43   | -0.73  |
| 4.99   | 0.76   | -2.36  | -0.42  | -0.83  | -0.70  | -2.55  | -1.54  | -2.51  | -0.93  | -11.77  | -15.08  | -12.31  | -14.74 | -11.84  | -14.50  | -1.65  | -2.69  | -2.72  | -1.38  | 2.17   | -2.41  | -2.72  | -2.05  | -3.57  | -0.76  | -0.10  | -1.10  |
| 5.03   | -3.92  | -5.8   |        |        |        |        |        |        |        |         |         |         |        |         |         |        |        |        |        |        |        |        |        |        |        |        |        |

|        |        |        |        |        |        |        |        |        |        |         |         |         |         |         |         |        |        |        |        |        |        |        |        |         |        |        |        |       |
|--------|--------|--------|--------|--------|--------|--------|--------|--------|--------|---------|---------|---------|---------|---------|---------|--------|--------|--------|--------|--------|--------|--------|--------|---------|--------|--------|--------|-------|
| 0.12   | 3.72   | 0.85   | 3.70   | 2.82   | 1.17   | 2.70   | 1.60   | 0.76   | 3.26   | -2.63   | -2.72   | -4.09   | -3.70   | -2.60   | -1.79   | -0.77  | -0.95  | -2.77  | -1.52  | -1.32  | -2.21  | -1.51  | -1.54  | -1.38   | 0.58   | 2.71   | 0.67   |       |
| -0.20  | 1.11   | 0.43   | 0.52   | -0.23  | -0.37  | -0.42  | 0.86   | -0.93  | 0.65   | 8.26    | 7.44    | 7.81    | 6.44    | 7.17    | 7.03    | 3.70   | 3.80   | 4.13   | 3.70   | 3.74   | 3.99   | 3.30   | 3.82   | 3.73    | -0.84  | 2.48   | 0.52   |       |
| 1.78   | 2.50   | 1.76   | 3.36   | 2.60   | 2.92   | 2.69   | 2.39   | 3.61   | 4.61   | -15.63  | -15.63  | -15.26  | -14.52  | -13.81  | -12.85  | -7.44  | -6.48  | -6.47  | -8.59  | -8.19  | -8.47  | -6.74  | -8.01  | -7.29   | 2.37   | 3.34   | 4.26   |       |
| -18.14 | -8.31  | -1.78  | 4.52   | 0.68   | -1.17  | -1.66  | 3.56   | 0.92   | 5.70   | 0.10    | 1.63    | 0.62    | -2.93   | -0.66   | 0.72    | 0.99   | -0.25  | -0.67  | -0.95  | -0.50  | -0.18  | 1.31   | -0.14  | 0.45    | 3.24   | 3.88   | 3.20   |       |
| 1.61   | 1.14   | 2.94   | 3.34   | 1.72   | 2.78   | 2.80   | 2.34   | 2.10   | 3.81   | 1.81    | 2.34    | 0.73    | 1.40    | 1.27    | 0.79    | 0.84   | 2.39   | 2.08   | 0.99   | 2.31   | 2.79   | 2.07   | 1.67   | 1.91    | 3.68   | 4.05   | 3.78   |       |
| 15.14  | 10.75  | 2.10   | 6.57   | 3.10   | 1.06   | 3.22   | 4.12   | 1.62   | 3.95   | 1.40    | 2.48    | -1.26   | 2.69    | 2.24    | 2.61    | 3.03   | 2.72   | 2.91   | 0.75   | 1.61   | 3.75   | 4.09   | 1.17   | 2.80    | 8.60   | 8.75   | 5.38   |       |
| 1.97   | 2.41   | 2.28   | 2.11   | 2.10   | 1.61   | 1.78   | 2.38   | 1.57   | 3.12   | 2.62    | 3.97    | 3.22    | 2.28    | 3.99    | 3.10    | 3.20   | 3.53   | 4.60   | 3.27   | 3.24   | 2.77   | 3.47   | 4.49   | 3.75    | 3.39   | 3.46   | 1.78   |       |
| 2.26   | 1.95   | 2.32   | 2.92   | 2.60   | 1.11   | 2.77   | 1.65   | 2.37   | 3.06   | 3.33    | 3.79    | 4.29    | 3.63    | 2.12    | 3.01    | 2.65   | 2.72   | 2.10   | 3.05   | 3.01   | 2.17   | 3.17   | 3.22   | 3.23    | 1.23   | 2.95   | 3.12   |       |
| 1.40   | 2.97   | 2.29   | 2.43   | -0.10  | 2.21   | 2.33   | 1.85   | 1.72   | 1.43   | 1.03    | 1.20    | 0.99    | 0.67    | 2.02    | 1.62    | 1.77   | 1.92   | -0.14  | 0.48   | 1.88   | 2.31   | 0.59   | 0.09   | 1.94    | 1.77   | 2.19   | 2.75   |       |
| -0.59  | 0.38   | -3.10  | 1.29   | -0.46  | -3.95  | -6.50  | -3.16  | -2.38  | -1.49  | -1.19   | -0.71   | -1.71   | -1.31   | -1.12   | 0.16    | 0.59   | 0.11   | -2.10  | 0.07   | 0.24   | 0.34   | 1.53   | -0.68  | 0.57    | -2.45  | 0.54   | 0.71   |       |
| -4.90  | -1.97  | -3.16  | -0.07  | -0.24  | -1.42  | -1.77  | -0.54  | -1.24  | 0.96   | -0.28   | 0.06    | -0.70   | -0.77   | 0.17    | 0.02    | 0.20   | 0.08   | 0.53   | 0.09   | 0.32   | 0.88   | 0.40   | -0.67  | -0.40   | -0.27  | -0.40  | -0.14  |       |
| 5.07   | 3.16   | 2.83   | 4.63   | 2.48   | 4.19   | 3.70   | 4.15   | 3.38   | 5.22   | 1.03    | 0.70    | 2.41    | 0.49    | -0.63   | -0.77   | 0.21   | 0.17   | -1.16  | -1.90  | 0.79   | -1.44  | 0.32   | -0.40  | -0.54   | 4.28   | 3.56   | 4.00   |       |
| -5.90  | -4.44  | -5.94  | -3.38  | -3.12  | -3.11  | -4.14  | -3.73  | -4.87  | -3.47  | 7.46    | 8.46    | 7.35    | 6.64    | 6.16    | 7.21    | 6.53   | 6.51   | 4.37   | 6.68   | 5.10   | 5.52   | 4.63   | 5.83   | 6.08    | -2.46  | -0.66  | -0.38  |       |
| 4.35   | 3.44   | 3.71   | 5.24   | 4.37   | 3.61   | 6.56   | 6.40   | 2.40   | 5.81   | -2.28   | -1.68   | -0.53   | -2.42   | -0.58   | -1.24   | -1.38  | -0.41  | -1.20  | -0.82  | 0.11   | 0.75   | 0.68   | -1.21  | -1.22   | 1.96   | 2.54   | 2.21   |       |
| 2.18   | 1.38   | 0.77   | 2.01   | 0.00   | -0.64  | 0.71   | 1.63   | 0.72   | -0.15  | -1.58   | -0.88   | -3.28   | -2.41   | -1.09   | -2.63   | 0.42   | -0.45  | -1.42  | -0.31  | -2.12  | 0.31   | -0.71  | -0.82  | -1.06   | 0.54   | 2.17   | 1.23   |       |
| 12.30  | 10.89  | 10.99  | 10.18  | 5.49   | -0.56  | -0.72  | 2.78   | 12.51  | 4.29   | 0.62    | 0.34    | -0.99   | -0.83   | -0.68   | -0.38   | 0.02   | -0.25  | 0.92   | -1.36  | 1.05   | -0.54  | 2.98   | -0.60  | 0.52    | 7.41   | 5.18   | 7.95   |       |
| 13.66  | 12.26  | 11.74  | 10.68  | 4.14   | -4.79  | -10.15 | 2.68   | 14.12  | -0.88  | -0.25   | -0.61   | 0.59    | -0.39   | -0.52   | -0.21   | -0.44  | -0.21  | 1.14   | -0.53  | 0.02   | 0.19   | 1.59   | -0.77  | -0.28   | 9.03   | 7.31   | 8.48   |       |
| -30.94 | -30.41 | -31.43 | -24.30 | -40.03 | -43.17 | -56.11 | -42.23 | -38.12 | -40.52 | 0.83    | 2.71    | 1.35    | 1.00    | 2.09    | 1.83    | 0.40   | 0.59   | -1.28  | 0.46   | 4.17   | 1.99   | 3.56   | 0.99   | -0.49   | -19.46 | -17.99 | -26.65 |       |
| -11.68 | -11.49 | -12.44 | -15.07 | -10.83 | -15.52 | -12.81 | -11.26 | -13.92 | -11.71 | -2.22   | -0.21   | -2.32   | 0.53    | 1.67    | -0.23   | -3.10  | -3.72  | -1.67  | -1.81  | -3.11  | -1.46  | -3.12  | -2.33  | -2.98   | -9.59  | -6.68  | -7.54  |       |
| -22.04 | -18.94 | -17.24 | -28.32 | -21.70 | -22.97 | -21.81 | -20.16 | -20.68 | -18.85 | -1.60   | 0.95    | 2.25    | 4.96    | 3.90    | 1.90    | -6.09  | -6.23  | -7.20  | -6.49  | -4.32  | -3.91  | -3.40  | -5.21  | -5.69   | -16.34 | -12.47 | -12.14 |       |
| -0.08  | 0.14   | -2.98  | 2.41   | -3.85  | -6.58  | -7.92  | -0.43  | -0.27  | -2.06  | -0.99   | 0.01    | 2.42    | 0.52    | 1.86    | 0.74    | -2.81  | -0.80  | -1.04  | -1.59  | -1.79  | -2.20  | 0.00   | -1.45  | -1.24   | -1.16  | 3.07   | 3.19   |       |
| -27.76 | -29.87 | -20.69 | -21.05 | -25.51 | -24.23 | -24.98 | -29.76 | -27.66 | -27.80 | -30.23  | -32.50  | -30.12  | -24.69  | -22.01  | -26.70  | -23.28 | -22.57 | -22.50 | -21.39 | -18.82 | -20.92 | -16.49 | -16.48 | -19.50  | -20.34 | -20.10 | -26.08 |       |
| 2.81   | 3.19   | 1.53   | 2.12   | 3.51   | 2.96   | 2.48   | 2.65   | 2.46   | 3.90   | 2.87    | 4.01    | 2.18    | 1.65    | 2.51    | 2.70    | 1.84   | 2.01   | 1.10   | 1.75   | 1.69   | 1.81   | 1.57   | 1.44   | 2.02    | 0.00   | 2.75   | 3.92   |       |
| 6.88   | 8.49   | 2.57   | 5.03   | 4.82   | 1.00   | 2.44   | 2.41   | 4.36   | 8.39   | 2.86    | 4.27    | 3.44    | 2.23    | 1.50    | 2.59    | 4.62   | 3.48   | 3.34   | 3.05   | 1.14   | 3.16   | 1.44   | 0.70   | 3.02    | 2.43   | 5.27   | 6.31   |       |
| -0.93  | 0.16   | -1.08  | -0.55  | 1.85   | -1.24  | -1.57  | 0.53   | -0.01  | 2.37   | -0.30   | 0.74    | -0.04   | -1.52   | 0.83    | -1.35   | 0.37   | -2.67  | -0.95  | 0.42   | -0.20  | 0.44   | 0.39   | -0.52  | -0.86   | -0.39  | 1.44   | 0.78   |       |
| -0.12  | -1.19  | 0.37   | 2.30   | 0.48   | -0.68  | 0.06   | 0.61   | 0.36   | 1.15   | -2.08   | -2.34   | -2.43   | -3.74   | -2.67   | -1.05   | -1.00  | -0.35  | -0.74  | -1.19  | -0.32  | -0.92  | -1.15  | -1.14  | -1.05   | -0.65  | -0.67  | 0.10   |       |
| 2.71   | 2.56   | 0.50   | 2.00   | 1.07   | 2.87   | 2.63   | 4.69   | 0.53   | 1.43   | 0.59    | 3.07    | 2.19    | 2.97    | 0.00    | 2.24    | -0.19  | 0.49   | 0.92   | 0.37   | 0.18   | -1.26  | 1.40   | 0.95   | 1.09    | 1.79   | 3.54   | 2.83   |       |
| 1.41   | -1.39  | -15.32 | -23.97 | -12.40 | -13.55 | -7.61  | -22.06 | -22.20 | -21.87 | -99.83  | -105.02 | -101.22 | -80.01  | -94.49  | -121.84 | -46.53 | -29.82 | -27.72 | -52.33 | -42.89 | -33.80 | -49.21 | -50.50 | -73.50  | -17.77 | -21.24 | -3.26  |       |
| 2.62   | -1.82  | -24.52 | -34.45 | -19.09 | -15.23 | -13.28 | -24.75 | -29.98 | -25.92 | -110.34 | -117.88 | -113.58 | -94.30  | -104.15 | -131.84 | -59.92 | -46.50 | -44.49 | -66.09 | -61.29 | -54.23 | -58.71 | -68.53 | -88.72  | -27.77 | -33.92 | -12.28 |       |
| -0.40  | -2.64  | -34.74 | -49.67 | -32.09 | -19.18 | -28.85 | -32.64 | -42.57 | -34.65 | -120.09 | -128.70 | -127.85 | -105.62 | -113.91 | -136.13 | -82.60 | -65.76 | -61.69 | -89.28 | -79.69 | -73.54 | -68.06 | -91.63 | -106.28 | -37.64 | -44.78 | -22.59 |       |
| 12.14  | 9.48   | 2.97   | 7.39   | 3.08   | -6.55  | -6.13  | -3.27  | 2.72   | -7.53  | -1.03   | -2.01   | -4.31   | -1.60   | -2.66   | -3.39   | -2.94  | -3.21  | -2.00  | -3.82  | -1.26  | -1.55  | -1.82  | -2.03  | 5.30    | 7.05   | 6.07   |        |       |
| 14.18  | 10.63  | 1.74   | 8.79   | -1.19  | -7.90  | -9.80  | -8.28  | 0.17   | -9.05  | -2.75   | -1.49   | -3.12   | -2.20   | -3.40   | -1.88   | -2.18  | -3.23  | -3.59  | -3.17  | -1.20  | -2.01  | -2.97  | -3.31  | 6.49    | 8.68   | 5.51   |        |       |
| -33.43 | -24.43 | -22.43 | -22.09 | -20.50 | -22.10 | -21.59 | -17.60 | -15.71 | -17.83 | 9.13    | 13.03   | 7.70    | 9.32    | 10.23   | 13.30   | 12.09  | 12.82  | 11.26  | 12.73  | 9.99   | 8.86   | 9.93   | 10.77  | 11.21   | -18.19 | -19.66 | -17.00 |       |
| 2.79   | 4.75   | 4.33   | 11.02  | 4.30   | 2.58   | 1.87   | 2.77   | 3.63   | 3.23   | -0.76   | -2.07   | -2.20   | -2.02   | -1.21   | -2.83   | 0.54   | -0.51  | -0.66  | -1.39  | -0.91  | -1.49  | 0.08   | -0.57  | -0.65   | 4.24   | 7.68   | 7.16   |       |
| 51.90  | 50.09  | 46.59  | 50.68  | 53.48  | 46.58  | 62.53  | 43.68  | 51.60  | 51.88  | -4.00   | -0.69   | -6.68   | -7.15   | -11.35  | -10.12  | -7.60  | -0.89  | -2.90  | -1.18  | -3.06  | -6.62  | -5.11  | -1.58  | -1.92   | -5.04  | 36.29  | 36.46  | 43.81 |
| 0.47   | 0.57   | 3.54   | -1.85  | -0.84  | -0.29  | -9.89  | -0.93  | 0.19   | -2.49  | -0.23   | 0.50    | 3.20    | -0.06   | 0.36    | 0.89    | -1.65  | -0.65  | -0.95  | -1.58  | -2.37  | -3.44  | -0.09  | -0.35  | -0.54   | 0.83   | -1.08  | 1.21   |       |
| -5.02  | -4.77  | -2.99  | -2.66  | -1.18  | -2.35  | -5.20  | -4.03  | -3.96  | -2.39  | 4.83    | 5.00    | 5.15    | 5.88    | 3.88    | 3.60    | 3.56   | 4.92   | 4.49   | 5.39   | 2.92   | 5.16   | 5.52   | 4.14   | 5.72    | -3.05  | -1.15  | -2.35  |       |
| -6.21  | -4.73  | -3.82  | -4.86  | -4.79  | -3.86  | -5.40  | -3.44  | -3.79  | -2.26  | 5.14    | 4.39    | 4.60    | 3.61    | 3.64    | 3.96    | 4.66   | 3.56   | 2.45   | 3.16   | 2.88   | 3.81   | 3.37   | 3.27   | 2.88    | -4.87  | -1.44  | -3.08  |       |
| -1.17  | -0.83  | -2.59  | -1.48  | -1.00  | -1.68  | -1.81  | -0.03  | -1.34  | -1.32  | 2.75    | 3.43    | 1.32    | 0.60    | 1.99    | 0.94    | 1.56   | 0.48   | 1.54   | 3.01   | 2.59   | 1.03   | 1.61   | 0.90   | 1.92    | -1.18  | -0.94  | -1.54  |       |
| 5.58   | 6.66   | 9.97   | 6.86   | 6.10   | 4.07   | 8.00   | 8.58   | 4.51   | 6.88   | -12.38  | -10.17  | -15.39  | -11.40  | -9.87   | -10.62  | -7.54  | -3.72  | -6.39  | -5.12  | -6.12  | -7.24  | -6.53  | -5.63  | -5.00   | 4.23   | 6.74   | 7.71   |       |
| 11.19  | 11.83  | 9.14   | 7.72   | 9.79   | 14.28  | 17.39  | 18.91  | 12.12  | 17.96  | -26.34  | -21.74  | -28.06  | -24.59  | -17.51  | -22.15  | -16.01 | -7.85  | -14.35 | -15.35 | -14.88 | -14.66 | -11.56 | -10.19 | -14.29  | 9.13   | 8.03   | 10.43  |       |
| 0.60   | -0.92  | -2.51  | 0.44   | -3.74  | -11.17 | -13.09 | -12.89 | -4.93  | -13.80 | 7.98    | 7.45    | 8.16    | 6.81    | 4.26    | 5.85    | 6.08   | 2.02   | 2.58   | 5.54   | 4.93   | 5.21   | 4.46   | 2.74   | 3.89    | -1.85  | 0.37   | -0.32  |       |
| 2.79   | 1.02   | -0.84  | 2.29   | 1.95   | -0.16  | -1.14  | 1.83   | 1.65   | 0.62   | -1.15   | -5.45   | -4.65   | -6.61   | -5.36   | -5.63   | -6.00  | -1.83  | -0.13  | 0.13   | 2.03   | -1.95  | -0.70  | -1.25  | -1.66   | 0.54   | 0.71   | 0.02   |       |
| 4.48   | -0.06  | -1.95  | -0.59  | -2.57  | -1.82  | -3.14  | -2.06  | -2.81  | -2.35  | -16.42  | -20.46  | -17.31  | -18.30  | -15.34  | -18.19  | -4.52  | -3.74  | -3.05  | -2.50  | -0.36  | -3.15  | -3.99  | -3.36  | -6.75   | -1.90  | -0.88  | -1.51  |       |
| 4.90   | -4.10  | -8.48  | -4.99  | -10.93 | -8.39  | -13.51 | -9.81  | -11.53 | -12.97 | -33.12  | -40.28  | -44.11  | -38.24  | -36.03  | -32.91  | -10.76 | -9.04  | -8.54  | -6.24  | -4.57  | -10.19 | -10.36 | -8.70  | -13.66  | -6.43  | -5.06  | -8.10  |       |
| 26.91  | 18.09  | 15.39  | 19.38  | 9.52   | -4.02  | -3.89  | -0.44  | 8.21   | 1.47   | -4.83   | -3.85   | -4.16   | -4.82   | -5.62   | -1.94   | -5.05  | -5.30  | -4.54  | -5.74  | -4.87  | -4.98  | -2.24  | -4.10  | -6.11   | 10.54  | 17.20  | 15.00  |       |
| 25.14  | 17.57  | 12.41  | 16.77  | 6.53   | -5.68  | -5.30  | -4.28  | 7.12   | -1.35  | -7.18   | -6.54   | -6.08   | -8.40   | -8.17   | -13.84  | -4.71  | -7.24  | -6.18  | -8.12  | -6.57  | -5.80  | -4.07  | -6.05  | -7.69   | 11.84  | 14.43  |        |       |

|        |        |        |        |        |        |        |        |        |        |         |         |         |         |         |         |         |        |        |         |        |        |        |         |         |        |        |        |        |
|--------|--------|--------|--------|--------|--------|--------|--------|--------|--------|---------|---------|---------|---------|---------|---------|---------|--------|--------|---------|--------|--------|--------|---------|---------|--------|--------|--------|--------|
| -18.26 | -7.79  | -2.03  | 4.63   | 1.70   | -5.47  | -2.13  | 3.02   | 1.78   | 5.55   | 0.58    | 2.52    | -1.62   | -3.77   | -1.33   | -0.22   | 0.63    | 0.42   | -0.82  | -0.63   | -0.08  | 0.44   | 0.09   | -0.35   | 2.41    | 3.76   | 3.70   |        |        |
| 0.97   | 0.76   | 3.67   | 3.17   | 2.61   | 2.62   | 2.57   | 1.88   | 1.76   | 4.50   | 2.76    | 2.99    | 1.41    | 1.38    | 1.05    | 1.71    | 1.18    | 2.12   | 1.38   | 1.30    | 1.96   | 2.86   | 2.41   | 1.56    | 2.32    | 2.91   | 4.57   | 3.99   |        |
| 15.72  | 10.66  | 2.69   | 5.97   | 3.79   | 2.12   | 3.30   | 4.34   | 1.81   | 3.93   | 1.55    | 0.90    | -2.02   | 2.93    | -0.68   | 0.32    | 2.27    | 4.83   | 3.56   | 1.03    | 2.56   | 3.55   | 2.90   | 1.06    | 2.15    | 5.29   | 7.96   | 5.88   |        |
| 1.71   | 2.46   | 1.67   | 2.71   | 2.20   | 1.33   | 2.00   | 1.90   | 2.60   | 3.51   | 3.60    | 3.78    | 3.88    | 2.60    | 3.74    | 3.44    | 3.12    | 3.78   | 2.77   | 4.00    | 3.73   | 3.26   | 2.96   | 4.69    | 4.86    | 2.94   | 3.39   | 1.83   |        |
| 2.22   | 2.61   | 3.14   | 2.69   | 3.00   | 1.92   | 2.92   | 2.16   | 2.17   | 2.96   | 3.56    | 4.14    | 4.08    | 3.42    | 2.06    | 3.20    | 3.08    | 2.82   | 2.38   | 2.87    | 2.75   | 2.09   | 2.83   | 3.32    | 2.53    | 1.82   | 3.62   | 4.26   |        |
| 1.21   | 2.68   | 1.24   | 2.69   | 1.17   | 1.77   | 1.71   | 3.59   | 3.49   | 1.83   | 1.83    | -1.38   | 2.55    | 1.10    | 2.04    | 3.31    | 1.24    | 2.74   | 0.18   | 2.46    | 1.87   | 2.00   | 0.80   | -0.09   | 2.28    | 2.83   | 2.92   | 3.32   |        |
| 0.57   | -0.31  | -1.86  | 1.58   | -2.30  | -3.18  | -5.63  | -3.08  | -2.41  | -1.86  | -1.97   | -0.68   | -1.06   | -2.11   | -0.41   | -0.20   | 0.50    | -0.62  | -1.06  | -0.48   | 0.36   | -0.19  | 1.14   | -1.33   | -0.88   | 0.00   | 1.27   | 2.06   |        |
| -2.67  | -0.26  | -1.72  | 0.95   | -0.43  | -1.29  | -0.66  | -0.01  | -1.75  | 1.87   | 0.32    | 0.66    | -0.58   | 0.03    | 0.12    | -0.51   | 0.74    | 0.61   | 0.35   | 0.19    | 0.75   | 0.67   | -0.17  | 0.92    | 0.31    | -1.66  | 0.14   | -0.31  |        |
| 3.13   | 3.70   | 2.17   | 3.80   | 3.18   | 4.63   | 5.10   | 3.17   | 3.33   | 4.42   | 0.64    | -0.38   | 1.23    | 0.62    | -0.74   | -1.67   | -0.34   | 0.71   | -1.63  | -1.31   | 0.29   | 0.71   | -0.29  | -0.32   | 0.34    | 3.93   | 4.48   | 4.69   |        |
| -3.35  | -2.33  | -5.80  | -2.22  | -1.93  | -2.84  | -2.17  | -2.61  | -4.76  | -2.57  | 7.90    | 8.21    | 7.19    | 7.08    | 7.10    | 7.34    | 6.99    | 7.20   | 6.05   | 6.08    | 5.51   | 5.69   | 4.73   | 6.06    | 6.46    | -2.26  | 0.13   | -0.63  |        |
| 4.02   | 6.00   | 3.79   | 4.61   | 4.48   | 4.00   | 6.58   | 5.69   | 2.85   | 4.85   | -1.85   | -1.70   | -0.47   | -2.26   | -1.08   | -3.00   | -0.72   | -0.53  | -0.45  | -0.97   | -0.52  | -0.41  | 0.30   | -0.91   | -1.70   | 2.61   | 2.41   | 2.99   |        |
| 1.01   | 3.12   | 1.45   | 1.23   | 0.15   | 0.26   | 0.95   | 0.74   | -0.09  | 0.00   | -1.87   | -2.26   | -2.63   | -1.68   | -1.10   | -2.85   | 1.30    | -0.74  | -1.18  | -0.83   | -1.61  | 0.40   | -0.49  | -0.24   | -0.14   | 0.58   | 2.34   | 0.97   |        |
| 9.90   | 9.57   | 10.19  | 10.15  | 5.27   | 0.38   | -3.34  | 0.54   | 11.90  | 3.95   | -0.60   | -0.39   | -1.30   | -0.66   | -0.41   | 0.01    | -0.01   | -1.10  | 0.86   | -1.29   | 1.24   | -0.93  | 2.15   | -0.53   | 0.05    | 7.79   | 5.53   | 9.11   |        |
| 10.48  | 10.19  | 11.81  | 9.36   | 3.92   | -4.99  | -11.77 | 1.01   | 14.29  | -0.30  | -0.84   | -0.63   | 0.24    | -0.10   | 0.02    | 0.86    | -0.25   | -0.46  | 0.98   | -0.34   | -0.08  | -0.34  | 1.67   | -0.64   | -0.43   | 9.25   | 6.93   | 8.15   |        |
| -27.09 | -28.61 | -29.44 | -22.20 | -40.03 | -41.99 | -49.78 | -42.73 | -37.40 | -39.87 | 0.04    | 2.21    | 1.38    | 1.59    | 2.88    | 2.91    | 1.46    | 1.65   | 1.82   | -0.21   | 4.25   | 3.02   | 4.15   | 1.58    | 0.62    | 0.22   | -2.17  | -26.80 |        |
| -11.27 | -10.96 | -11.39 | -15.56 | -9.31  | -15.55 | -10.83 | -10.89 | -14.08 | -11.72 | -2.78   | -0.73   | -0.59   | 1.02    | 1.57    | 0.14    | -2.79   | -3.31  | -4.30  | -1.60   | -2.83  | -0.78  | -1.88  | -0.94   | -2.23   | -8.58  | -6.72  | -6.01  |        |
| -21.08 | -18.59 | -16.24 | -27.46 | -20.76 | -21.97 | -20.80 | -20.94 | -21.70 | -18.26 | -0.11   | 2.15    | 3.52    | 5.35    | 4.90    | 3.50    | -3.83   | -3.84  | -5.74  | -4.82   | -2.41  | -4.82  | -2.86  | -2.57   | -4.02   | -3.89  | -16.69 | -12.77 | -12.54 |
| -0.80  | 0.10   | -2.85  | 0.85   | -3.06  | -6.43  | -7.14  | -3.17  | -1.08  | -3.38  | -0.27   | 1.21    | 1.31    | 0.33    | 1.02    | -0.31   | -2.78   | -0.16  | -0.34  | -1.09   | -2.83  | -0.69  | 0.88   | -2.59   | 0.67    | -0.21  | 2.78   | 2.87   |        |
| -29.63 | -31.28 | -21.08 | -23.98 | -27.17 | -24.83 | -27.02 | -31.29 | -28.92 | -30.62 | -30.59  | -33.62  | -32.29  | -26.17  | -23.41  | -27.68  | -23.63  | -23.19 | -24.59 | -22.43  | -21.92 | -21.94 | -19.33 | -17.72  | -20.52  | -21.30 | -20.96 | -26.18 |        |
| 2.85   | 3.84   | 1.90   | 2.93   | 3.86   | 2.59   | 3.01   | 1.58   | 2.75   | 4.04   | 3.17    | 4.77    | 2.31    | 1.23    | 2.66    | 2.65    | 2.31    | 1.54   | 1.54   | 1.94    | 2.48   | 1.63   | 1.66   | 1.72    | 1.85    | -0.39  | 3.54   | 3.74   |        |
| 7.39   | 8.07   | 2.63   | 4.50   | 5.69   | 1.08   | 3.50   | 2.44   | 5.05   | 6.60   | 3.55    | 4.03    | 4.53    | 2.67    | 1.46    | 2.97    | 4.71    | 4.98   | 3.25   | 2.65    | 2.09   | 2.23   | 2.11   | 0.72    | 2.92    | 0.83   | 5.26   | 7.35   |        |
| -1.05  | -0.26  | -1.18  | 1.59   | 1.52   | -1.99  | -0.70  | 1.59   | -0.29  | 0.59   | 1.11    | -0.34   | -0.85   | -1.18   | 0.07    | -1.10   | 0.45    | -3.14  | -0.41  | -0.24   | 0.62   | 0.32   | 1.91   | -0.31   | -0.97   | -0.91  | 0.83   | 0.41   |        |
| -0.32  | -0.01  | 0.81   | 1.04   | 0.37   | -0.81  | -0.20  | 0.19   | 0.83   | 1.14   | -2.66   | -2.18   | -2.59   | -3.10   | -2.21   | -1.71   | -0.36   | -0.08  | -0.92  | -1.39   | -0.84  | -0.96  | -1.77  | -1.31   | -0.90   | -0.54  | -0.29  | 0.66   |        |
| 1.52   | 2.12   | 1.82   | -0.60  | 0.92   | 2.02   | 1.85   | 3.90   | -0.10  | 1.60   | 1.16    | 2.02    | 2.52    | 2.58    | -0.63   | 1.46    | -0.96   | 0.90   | 1.21   | -0.10   | 0.52   | -1.66  | 1.24   | 0.88    | 1.06    | 1.32   | 2.65   | 2.61   |        |
| 1.74   | -1.14  | -18.43 | -30.49 | -15.61 | -9.50  | -9.97  | -25.88 | -29.03 | -26.75 | -109.79 | -115.17 | -114.50 | -87.77  | -101.78 | -131.63 | -67.13  | -54.58 | -49.36 | -72.09  | -64.13 | -54.71 | -67.94 | -72.49  | -90.07  | -23.08 | -34.95 | -11.52 |        |
| 0.25   | -2.83  | -29.46 | -43.88 | -24.04 | -12.46 | -18.48 | -30.42 | -39.87 | -32.16 | -118.19 | -125.09 | -122.15 | -101.03 | -110.41 | -137.83 | -80.09  | -74.26 | -69.23 | -86.25  | -82.11 | -74.55 | -77.63 | -90.42  | -102.38 | -34.84 | -51.02 | -23.70 |        |
| -2.48  | -4.58  | -40.52 | -60.73 | -38.03 | -18.53 | -34.37 | -43.19 | -56.90 | -42.68 | -125.36 | -132.46 | -135.61 | -111.40 | -118.10 | -139.76 | -100.01 | -93.94 | -87.34 | -106.46 | -98.78 | -95.16 | -96.17 | -112.38 | -114.81 | -46.83 | -68.38 | -35.83 |        |
| 8.32   | 7.90   | 2.39   | 6.74   | 1.21   | -6.01  | -6.50  | -4.72  | 2.25   | -6.94  | -1.22   | -2.44   | -3.14   | -1.91   | -1.02   | -2.98   | -2.90   | -2.86  | -3.02  | -2.51   | -3.69  | -1.44  | -0.48  | -3.06   | -2.04   | 4.70   | 6.66   | 5.41   |        |
| 9.79   | 8.10   | 0.64   | 7.79   | -1.85  | -8.28  | -10.69 | -8.82  | 0.09   | -9.75  | -2.89   | -1.99   | -3.40   | -2.03   | -2.14   | -3.58   | -2.29   | -2.62  | -3.49  | -4.09   | -3.51  | -1.37  | -2.45  | -2.84   | -3.44   | 6.30   | 6.74   | 5.61   |        |
| -23.50 | -18.48 | -18.56 | -20.05 | -17.01 | -20.15 | -17.61 | -15.92 | -14.60 | -15.02 | 9.12    | 13.19   | 7.71    | 6.07    | 12.25   | 12.41   | 12.48   | 13.77  | 10.85  | 13.46   | 10.77  | 8.73   | 9.72   | 9.60    | 12.70   | 16.70  | -21.30 | -15.18 |        |
| 3.30   | 4.39   | 2.45   | 10.66  | 3.49   | 2.75   | 1.80   | 2.52   | 1.97   | 2.41   | -0.16   | -2.25   | -2.99   | -2.32   | -2.28   | -2.47   | 0.14    | -0.41  | -0.70  | -1.40   | -2.02  | -1.47  | -0.43  | -0.86   | -2.39   | 4.96   | 8.15   | 7.72   |        |
| 47.37  | 47.39  | 48.01  | 49.64  | 53.01  | 45.79  | 58.65  | 45.59  | 51.72  | 50.04  | -2.69   | -8.00   | -1.18   | -11.23  | -10.12  | -9.61   | -3.46   | -7.23  | -3.11  | -5.81   | -8.57  | -7.17  | -2.20  | -5.67   | -6.28   | 40.05  | 36.37  | 44.79  |        |
| -0.28  | 0.36   | 4.28   | -2.46  | -0.32  | -0.09  | -10.14 | 0.72   | -0.04  | -1.44  | 1.54    | -0.04   | 1.34    | -0.08   | 0.70    | 0.75    | -0.94   | -2.65  | -1.34  | -0.16   | -4.21  | -2.51  | -1.56  | -0.99   | -1.19   | 1.34   | -0.93  | 2.69   |        |
| -3.98  | -4.19  | -2.88  | -3.06  | -2.88  | -2.19  | -2.53  | -3.30  | -3.63  | -2.12  | 5.88    | 4.12    | 5.43    | 5.06    | 4.25    | 3.36    | 5.18    | 5.27   | 4.77   | 5.08    | 3.02   | 5.59   | 5.42   | 4.99    | 6.09    | -3.08  | -1.30  | -1.69  |        |
| -5.19  | -3.87  | -2.71  | -4.22  | -4.16  | -3.09  | -2.61  | -2.08  | -4.00  | -2.94  | 5.08    | 4.71    | 4.72    | 3.90    | 4.28    | 4.22    | 4.46    | 4.11   | 2.70   | 3.23    | 2.90   | 3.49   | 2.86   | 4.19    | 2.55    | -4.46  | -5.58  | -3.34  |        |
| -0.08  | -0.33  | -3.01  | -0.52  | -0.72  | -1.19  | -1.47  | -0.51  | -1.00  | -0.38  | 2.95    | 1.70    | 2.08    | 1.75    | 1.89    | 3.32    | 1.19    | 1.38   | 1.43   | 2.57    | 2.25   | 2.09   | 1.79   | 1.58    | 2.46    | -2.03  | -1.39  | 1.56   |        |
| 4.59   | 6.23   | 4.51   | 6.46   | 6.34   | 4.51   | 6.92   | 7.90   | 4.06   | 6.64   | -12.97  | -10.51  | -16.47  | -11.64  | -10.36  | -11.61  | -8.49   | -3.88  | -6.92  | -5.51   | -5.99  | -7.48  | -6.92  | -7.16   | -5.39   | 2.69   | 5.85   | 8.26   |        |
| 10.97  | 12.34  | 10.08  | 7.23   | 10.10  | 12.99  | 10.72  | 18.34  | 12.88  | 17.61  | -28.50  | -22.37  | -29.33  | -24.17  | -18.12  | -23.43  | -16.95  | -8.54  | -15.91 | -16.40  | -17.06 | -16.10 | -12.30 | -10.90  | -15.28  | 9.60   | 8.75   | 11.21  |        |
| -0.46  | -2.11  | -3.20  | 0.57   | -2.15  | -10.20 | -13.06 | -11.85 | -7.29  | -13.82 | 8.30    | 6.91    | 8.00    | 5.44    | 4.17    | 6.85    | 5.97    | 2.20   | 2.66   | 5.60    | 4.79   | 4.80   | 3.53   | 2.06    | 4.61    | -1.59  | 0.10   | -1.27  |        |
| 3.25   | -0.10  | -0.40  | 2.29   | 0.73   | 0.52   | -1.44  | 1.92   | -0.48  | -0.48  | -5.99   | -6.62   | -6.01   | -6.13   | -6.15   | -7.04   | -1.46   | -2.29  | -0.33  | -1.49   | 0.48   | -2.01  | -2.33  | -2.06   | -3.83   | -0.57  | 0.75   | -0.17  |        |
| 4.92   | 0.01   | -2.60  | -0.52  | -2.60  | -2.44  | -3.99  | -3.24  | -3.26  | -3.22  | -31.31  | -25.55  | -23.49  | -20.84  | -19.32  | -21.70  | -6.44   | -5.72  | -5.63  | -6.08   | -3.20  | -6.14  | -7.48  | -6.29   | -10.67  | -1.87  | -1.69  | -1.61  |        |
| 5.94   | -5.36  | -10.05 | -7.92  | -14.52 | -9.14  | -15.89 | -12.03 | -15.15 | -16.87 | -38.90  | -47.00  | -52.88  | -44.24  | -41.42  | -37.51  | -17.53  | -12.73 | -12.91 | -11.14  | -10.34 | -14.70 | -15.78 | -14.43  | -18.54  | -6.45  | -7.83  | -10.03 |        |
| 16.34  | 13.78  | 11.26  | 17.48  | 6.46   | -4.89  | -8.38  | -2.40  | 8.02   | -0.29  | -4.37   | -4.13   | -5.01   | -3.38   | -6.01   | -10.02  | -4.52   | -5.69  | -6.08  | -6.13   | -5.21  | -5.52  | -2.80  | -6.72   | 9.42    | 16.42  | 16.42  | 14.42  |        |
| 18.00  | 12.73  | 9.79   | 14.86  | 5.25   | -7.06  | -9.17  | -5.03  | 6.32   | -2.04  | -7.86   | -6.21   | -6.76   | -8.69   | -8.57   | -13.59  | -4.50   | -7.66  | -6.63  | -8.58   | -6.73  | -6.72  | -4.38  | -6.57   | -8.31   | 10.34  | 18.77  | 16.94  |        |
| -9.52  | -7.19  | -7.34  | -9.26  | -5.79  | -7.82  | -12.11 | -12.05 | -6.87  | -8.00  | 4.89    | 5.73    | 2.83    | 6.01    | 6.21    | 9.93    | 4.13    | 4.94   | 3.75   | 4.68    | 4.26   | 3.91   | 5.86   | 4.40    | 4.77    | -6.25  | -10.45 | -7.75  |        |
| -1.49  | 0.75   | -0.99  | 2.11   | -0.61  | -2.19  | -3.30  | -2.45  | -1.09  | -2.14  | -1.11   | 1.02    | -1.72   | -1.82   | -1.40   | -2.57   | 1.44    | -0.81  | 0.19   | -0.82   | -0.04  | 0.52   | -1.40  | -0.01   | -2.51   | 1.72   | 2.31   |        |        |
| -2.04  | -1.72  | -2.52  | -0.58  | -2.10  | -1.32  | -3.55  | -2.11  | -1.61  | -2.26  | 1.54    | 1.48    | 0.02    | -1.77   | -0.40   | -0.44   | 1.05    | 1.63   | -0.35  | 0.59    | 0.07   | 0.57   | 0.69   | 0.76    | -0.26   | -2.95  | -      |        |        |

|        |        |        |        |        |        |        |        |        |        |         |         |         |         |         |         |         |         |         |         |         |         |         |         |         |        |        |        |
|--------|--------|--------|--------|--------|--------|--------|--------|--------|--------|---------|---------|---------|---------|---------|---------|---------|---------|---------|---------|---------|---------|---------|---------|---------|--------|--------|--------|
| 2.65   | 3.06   | 2.13   | 2.68   | 2.36   | 2.67   | 1.47   | 2.43   | 2.62   | 2.15   | 4.13    | 3.94    | 2.22    | 3.70    | 3.77    | 4.57    | 5.17    | 5.14    | 4.26    | 3.61    | 3.57    | 2.98    | 5.32    | 4.72    | 3.18    | 3.96   | 2.59   |        |
| 2.46   | 2.72   | 3.06   | 3.14   | 2.80   | 1.69   | 3.22   | 2.08   | 2.71   | 3.74   | 3.24    | 3.71    | 3.93    | 3.33    | 2.23    | 2.77    | 3.14    | 2.13    | 1.86    | 3.28    | 3.18    | 2.67    | 3.18    | 2.70    | 2.86    | 2.49   | 3.09   | 3.30   |
| 1.84   | 2.93   | 1.24   | 3.64   | 2.40   | 2.13   | 2.74   | 3.28   | 2.98   | 1.23   | 1.36    | 2.15    | 0.99    | 1.89    | 2.39    | 1.10    | 1.42    | 2.70    | 0.57    | 0.59    | 3.04    | 1.32    | 0.50    | 0.56    | 2.28    | 2.74   | 2.01   | 2.81   |
| -0.51  | -0.17  | -1.98  | 1.23   | -2.32  | -3.43  | 5.24   | -2.93  | -1.23  | -1.95  | -1.76   | -1.83   | -0.61   | -1.54   | -0.87   | -1.10   | 0.40    | -0.74   | 0.94    | 0.04    | 0.60    | -0.14   | 0.95    | -0.77   | -0.95   | 1.33   | 1.71   | 1.59   |
| -1.43  | -0.92  | -1.34  | 1.50   | -0.93  | -0.99  | -0.23  | 3.32   | -2.01  | 0.06   | 0.11    | 0.81    | -1.14   | -1.19   | 0.19    | -0.07   | 0.36    | -0.13   | 0.78    | -0.32   | 0.61    | 1.24    | -0.50   | 0.41    | 0.56    | -1.23  | 0.77   | -0.03  |
| 4.13   | 4.33   | 2.67   | 4.98   | 2.50   | 4.27   | 5.71   | 3.27   | 5.01   | 3.61   | 0.16    | 0.21    | 1.66    | -0.04   | -0.18   | -0.32   | -0.46   | 1.07    | -1.48   | -1.48   | -0.72   | -1.59   | -0.82   | 0.17    | 0.10    | 4.35   | 2.21   | 3.26   |
| -1.74  | -1.56  | -3.86  | -1.92  | -1.95  | -2.63  | -3.25  | -3.39  | -4.64  | -2.34  | 8.33    | 8.91    | 8.29    | 6.29    | 7.61    | 8.48    | 6.84    | 7.43    | 6.81    | 6.17    | 5.59    | 6.04    | 5.43    | 5.46    | 5.90    | -2.26  | 0.24   | -0.07  |
| 3.62   | 2.90   | 3.97   | 5.58   | 4.65   | 4.14   | 6.61   | 5.99   | 2.46   | 5.07   | -2.00   | -2.26   | -1.52   | -1.77   | -1.20   | -1.40   | -0.41   | -0.82   | -0.63   | -0.83   | -0.16   | -0.42   | 0.34    | -0.90   | -1.11   | 2.63   | 2.94   | 2.61   |
| 0.95   | 2.80   | 2.28   | 1.90   | -0.19  | -0.33  | 0.41   | 1.23   | -0.21  | 0.54   | -0.70   | -0.83   | -3.03   | -1.44   | -1.32   | -2.64   | 0.78    | -0.53   | -1.93   | -0.84   | -2.06   | 0.39    | -1.02   | -0.34   | -0.03   | 0.61   | 2.39   | 1.19   |
| 8.84   | 8.54   | 10.68  | 9.77   | 7.71   | -0.86  | -3.37  | 2.81   | 13.69  | 2.85   | -0.50   | -0.50   | -0.78   | -0.58   | -0.06   | 0.10    | 0.63    | -1.15   | 0.14    | -1.58   | 0.75    | -0.91   | 2.90    | -1.24   | -0.21   | 7.88   | 6.04   | 8.10   |
| 10.45  | 8.94   | 10.87  | 10.22  | 3.90   | -4.03  | -10.57 | 2.29   | 14.08  | -0.46  | -0.67   | -0.37   | 0.05    | -0.28   | -0.12   | 0.28    | -0.14   | -0.30   | 0.57    | -1.19   | 0.41    | -0.77   | 1.97    | -0.88   | -0.45   | 9.25   | 8.21   | 8.03   |
| -23.96 | -25.87 | -28.59 | -21.15 | -40.29 | -42.86 | -49.24 | -43.05 | -35.44 | -40.77 | 1.79    | 1.96    | 1.19    | 2.52    | 3.36    | 3.93    | 2.68    | 2.71    | 1.42    | 1.13    | 1.47    | 3.43    | 4.35    | 2.43    | 0.67    | -19.93 | -18.82 | -28.20 |
| -10.07 | -11.37 | -11.55 | -14.90 | -10.77 | -15.31 | -10.95 | -11.48 | -14.53 | -13.70 | -2.49   | 0.21    | 0.14    | 1.41    | 1.41    | -1.79   | -2.77   | -3.24   | -1.71   | -2.32   | -0.29   | -1.80   | -1.78   | -2.16   | -8.89   | -7.05  | -6.29  |        |
| -19.56 | -18.72 | -16.04 | -27.19 | -20.97 | -22.07 | -18.99 | -20.65 | -21.40 | -18.80 | 0.79    | 3.32    | 4.48    | 5.80    | 6.30    | 3.80    | -2.84   | -3.02   | -3.88   | -3.52   | -1.21   | -1.39   | -1.58   | -2.88   | -2.07   | -16.85 | -12.87 | -12.13 |
| 1.03   | -0.07  | -3.66  | 2.00   | -3.89  | -7.24  | -5.73  | -3.08  | -1.40  | -4.88  | 0.08    | 0.55    | 0.52    | 1.77    | 1.68    | 0.53    | -1.74   | -0.93   | -2.23   | -0.63   | -1.71   | -0.92   | 0.02    | -1.92   | 0.75    | -0.73  | 1.82   | 2.00   |
| -30.91 | -34.03 | -22.47 | -25.58 | -29.15 | -26.84 | -29.14 | -32.68 | -30.67 | -32.44 | -31.40  | -34.97  | -34.80  | -28.47  | -23.49  | -28.50  | -25.24  | -25.07  | -25.21  | -24.17  | -22.07  | -23.11  | -20.83  | -19.75  | -21.40  | -22.37 | -22.54 | -27.74 |
| 2.73   | 3.12   | 2.22   | 3.04   | 3.79   | 2.47   | 2.46   | 2.17   | 2.62   | 3.72   | 4.50    | 4.88    | 2.89    | 1.47    | 2.27    | 2.37    | 1.98    | 2.32    | 1.39    | 2.01    | 2.94    | 1.87    | 2.54    | 0.21    | 1.48    | 0.75   | 3.38   | 4.27   |
| 7.84   | 8.77   | 2.38   | 5.10   | 6.03   | 3.24   | 4.35   | 3.39   | 5.74   | 7.17   | 4.07    | 4.63    | 3.99    | 0.95    | 1.76    | 3.30    | 5.12    | 5.20    | 2.83    | 2.63    | 1.72    | 2.58    | 1.66    | 0.37    | 3.75    | 1.95   | 7.03   | 7.65   |
| -0.47  | -0.73  | 0.65   | -0.18  | 1.01   | -1.42  | -2.51  | 0.42   | -1.23  | 1.19   | 0.69    | -0.21   | 0.03    | -0.65   | 0.08    | -1.47   | -0.46   | -2.83   | -0.28   | -0.54   | -0.73   | 0.25    | 1.29    | 0.50    | -0.81   | 0.39   | 1.86   | 0.50   |
| -0.52  | -0.89  | -0.03  | 2.32   | 0.58   | -0.90  | 0.10   | 0.38   | 1.22   | 0.44   | -2.56   | -2.68   | -2.70   | -3.74   | -2.24   | -1.89   | -0.47   | -0.24   | -1.33   | -0.93   | -0.86   | -0.58   | -1.41   | -1.82   | -0.56   | 0.02   | -0.34  | -0.09  |
| 2.69   | 2.27   | 1.71   | 1.17   | -3.00  | 2.89   | 1.10   | 4.34   | -0.71  | 1.36   | 1.59    | 2.29    | 2.91    | 2.01    | -0.52   | 1.88    | 0.02    | 0.43    | 0.72    | -0.32   | 0.18    | -0.70   | 1.04    | 1.84    | 1.41    | 0.79   | 2.51   | 3.43   |
| -0.45  | -2.83  | -25.57 | -47.34 | -25.36 | -16.66 | -20.67 | -37.83 | -47.48 | -33.77 | -116.01 | -122.33 | -124.01 | -97.20  | -107.06 | -139.08 | -80.93  | -76.42  | -70.05  | -86.61  | -78.04  | -69.80  | -80.16  | -89.12  | -103.00 | -33.24 | -51.03 | -24.68 |
| -4.92  | -6.10  | -38.26 | -61.83 | -38.41 | -26.07 | -36.50 | -48.19 | -62.06 | -43.70 | -123.20 | -129.92 | -129.10 | -109.03 | -115.33 | -143.19 | -94.06  | -92.28  | -87.35  | -98.01  | -94.79  | -88.82  | -89.76  | -105.21 | -111.22 | -47.69 | -70.00 | -41.56 |
| -11.10 | -11.24 | -54.02 | -78.83 | -55.55 | -39.60 | -57.99 | -64.36 | -82.57 | -58.58 | -127.72 | -136.32 | -140.18 | -116.11 | -119.57 | -141.66 | -110.10 | -111.29 | -104.60 | -117.03 | -109.25 | -106.32 | -106.85 | -122.63 | -121.97 | -61.55 | -87.15 | -57.57 |
| 7.38   | 6.54   | 1.37   | 7.41   | 0.86   | -6.37  | -6.93  | -5.26  | 2.28   | -7.01  | -1.46   | -2.57   | -3.73   | -1.91   | -1.23   | -3.70   | -3.63   | -2.29   | -3.17   | -2.14   | -3.73   | -2.17   | -0.67   | -3.03   | -2.27   | 4.48   | 6.44   | 5.41   |
| 8.21   | 7.88   | 5.99   | 7.57   | -2.26  | -9.06  | -11.36 | -8.40  | 0.92   | -10.08 | -2.52   | -1.05   | -2.66   | -2.04   | -2.26   | -3.76   | -2.31   | -2.65   | -3.48   | -3.39   | -3.20   | -0.90   | -2.45   | -2.09   | -3.06   | 7.10   | 5.93   | 5.67   |
| -19.30 | -16.58 | -16.67 | -18.99 | -17.65 | -18.41 | -17.19 | -13.79 | -13.33 | -15.32 | 12.62   | 8.79    | 7.81    | 9.62    | 12.44   | 12.30   | 13.61   | 10.85   | 13.83   | 10.59   | 9.03    | 9.53    | 10.14   | 12.61   | -16.08  | -19.94 | -16.37 |        |
| 4.66   | 4.97   | 3.83   | 10.86  | 3.01   | 2.13   | -0.12  | 2.36   | 2.62   | 2.27   | -0.12   | -2.15   | -3.64   | -2.41   | -1.22   | -3.51   | -0.10   | -0.53   | -1.87   | -2.36   | -1.10   | -2.00   | -2.01   | -2.28   | -2.44   | 6.08   | 8.43   | 8.32   |
| 45.23  | 46.60  | 46.73  | 51.14  | 52.38  | 46.69  | 57.76  | 45.12  | 52.69  | 49.63  | 4.18    | -8.51   | -10.05  | -11.90  | -12.70  | -10.37  | -4.35   | -7.81   | -5.11   | -7.09   | -9.43   | -8.60   | -5.13   | -7.12   | -8.53   | 40.22  | 37.48  | 43.39  |
| 0.66   | -0.98  | 3.81   | 0.54   | -1.43  | -0.70  | -10.12 | 0.54   | -1.29  | -2.97  | 1.37    | -0.02   | -1.53   | -0.28   | 1.41    | 0.58    | -1.67   | -0.77   | -0.33   | -3.92   | -3.41   | -1.83   | -2.14   | -0.60   | -1.00   | -2.51  | 0.92   |        |
| -3.20  | -3.77  | -1.62  | -2.48  | -2.79  | -1.90  | -2.02  | -3.54  | -3.56  | -3.01  | 5.32    | 4.56    | 5.33    | 5.17    | 3.97    | 3.36    | 5.12    | 5.56    | 5.94    | 5.42    | 4.21    | 5.78    | 6.05    | 5.41    | 5.92    | -2.41  | -0.79  | -1.78  |
| -4.22  | -3.70  | -2.99  | -4.83  | -5.14  | -2.65  | -2.22  | -2.72  | -3.64  | -2.59  | 5.38    | 4.98    | 5.19    | 4.12    | 3.94    | 4.34    | 4.76    | 4.28    | 2.65    | 3.86    | 4.02    | 3.06    | 2.97    | 4.21    | 2.84    | -3.79  | -1.81  | -3.37  |
| -0.37  | -0.08  | -1.39  | 0.14   | -0.13  | -0.88  | -0.66  | -0.97  | -0.57  | -1.21  | 3.72    | 1.50    | 1.26    | 1.62    | 2.01    | 1.75    | 1.66    | 0.62    | 2.16    | 1.66    | 1.30    | 3.49    | 0.82    | 1.39    | 2.81    | -2.88  | -0.34  | 0.93   |
| 4.37   | 6.14   | 4.85   | 6.43   | 5.38   | 3.78   | 7.10   | 7.37   | 4.02   | 6.29   | -13.24  | -11.53  | -16.04  | -12.30  | -9.72   | -11.39  | -9.67   | -4.74   | -8.20   | -6.02   | -6.24   | -8.44   | -6.59   | -5.86   | -5.90   | 3.60   | 6.94   | 7.74   |
| 11.72  | 10.99  | 9.99   | 7.84   | 8.86   | 14.27  | 16.63  | 18.54  | 12.59  | 17.27  | -29.10  | -23.29  | -30.15  | -25.12  | -19.09  | -24.00  | -18.12  | -8.93   | -17.32  | -17.92  | -12.60  | -16.77  | -13.19  | -11.95  | -15.39  | 10.36  | 9.38   | 10.26  |
| -0.82  | -1.24  | -2.55  | 0.59   | -1.34  | -11.47 | -12.47 | -11.88 | -4.79  | -12.52 | 9.76    | 6.71    | 7.13    | 6.78    | 4.68    | 7.37    | 6.13    | 1.39    | 3.78    | 6.67    | 5.46    | 5.63    | 3.20    | 3.48    | 3.91    | -3.15  | -1.13  | -0.92  |
| 4.16   | -0.07  | -0.12  | 2.64   | 0.30   | 0.58   | -2.70  | 0.34   | -0.48  | 0.10   | -7.99   | -6.71   | -9.65   | -7.72   | -7.90   | -4.45   | -1.60   | -3.54   | -1.39   | -3.07   | -1.06   | -4.21   | -2.50   | -3.21   | -5.31   | -0.52  | -0.45  | -0.73  |
| 3.61   | -0.40  | -4.21  | -1.07  | -4.46  | -4.00  | -5.94  | -4.68  | -5.25  | -5.50  | -24.97  | -29.54  | -28.40  | -23.87  | -22.52  | -25.32  | -10.02  | -8.88   | -8.29   | -9.03   | -7.59   | -9.01   | -10.94  | -9.44   | -15.36  | -2.72  | -2.84  | -4.07  |
| 4.64   | -6.77  | -12.19 | -9.52  | -15.81 | -12.83 | -20.17 | -15.41 | -19.79 | -19.69 | -47.45  | -53.37  | -62.12  | -50.14  | -48.90  | -43.32  | -23.41  | -20.49  | -19.89  | -16.50  | -16.23  | -20.71  | -22.21  | -21.31  | -26.28  | -8.74  | -11.51 | -13.58 |
| 12.39  | 11.66  | 8.86   | 16.01  | 5.42   | -5.66  | -9.70  | -3.97  | 7.63   | -1.03  | -4.97   | -4.65   | -4.03   | -4.26   | -6.11   | -8.64   | -6.06   | -5.79   | -5.25   | -6.48   | -4.92   | -5.43   | -2.77   | -4.66   | -5.98   | 9.55   | 17.17  | 13.34  |
| 13.90  | 11.56  | 8.81   | 13.97  | 4.22   | -6.66  | -10.97 | -6.08  | 6.45   | -2.51  | -7.67   | -5.96   | -5.97   | -9.02   | -8.84   | -5.14   | -7.78   | -7.07   | -5.25   | -6.48   | -4.92   | -5.43   | -2.77   | -4.66   | -5.98   | 10.43  | 18.13  | 16.65  |
| -7.09  | -6.31  | -5.41  | -7.61  | -5.58  | -7.67  | -12.26 | -10.55 | -6.63  | -8.43  | 3.51    | 5.66    | 4.23    | 5.96    | 6.24    | 10.43   | 5.12    | 4.88    | 4.86    | 4.87    | 4.77    | 3.22    | 5.71    | 5.35    | 4.68    | -5.70  | -10.27 | -6.71  |
| -0.94  | 0.23   | -0.58  | 2.84   | -1.07  | -1.42  | -4.17  | -3.26  | -0.90  | -2.07  | 0.94    | 0.30    | -1.48   | -0.59   | -2.25   | -1.82   | 1.01    | -0.80   | -1.12   | -0.99   | 0.19    | 0.52    | 0.48    | -0.35   | -0.11   | -0.94  | 1.56   | 3.57   |
| -1.00  | -0.67  | -1.57  | -0.45  | -2.00  | -1.15  | -3.03  | -1.63  | -1.49  | -2.01  | 1.71    | 0.80    | 0.42    | -2.29   | -0.32   | -1.08   | 1.11    | 1.69    | -0.14   | 1.18    | 0.04    | 0.48    | 0.79    | 0.36    | -0.25   | -3.09  | -0.07  | -0.01  |
| 3.95   | 3.63   | 3.24   | 0.99   | 0.96   | 1.88   | -1.07  | 1.45   | 1.15   | -0.21  | -0.54   | -2.58   | -2.70   | -0.71   | -0.32   | -0.46   | -0.68   | -0.69   | -1.30   | -0.90   | 0.15    | 0.48    | -0.19   | -0.61   | -0.34   | 1.03   | 1.63   | 3.38   |
| 19.12  | 18.44  | 18.16  | 21.47  | 19.25  | 16.25  | 17.13  | 21.05  | 18.52  | 20.50  | -2.35   | -3.33   | -3.76   | -5.58   | -5.31   | -6.32   | -2.70   | -2.99   | -2.25   | -2.37   | -2.92   | -3.12   | -1.83   | -1.59   | -4.08   | 14.05  | 17.40  | 19.00  |
| 41.52  | 45.30  | 39.82  | 38.85  | 49.64  | 37.77  | 31.76  | 43.12  | 52.99  | 35.39  | -3.75   | -2.22   | -5.28   | -4.12   | -8.12   | -8.19   | -4.20   | -4.46   | -5.11   | -4.94   | -5.67   | -5.32   | -2.33   | -3.08   | -5.56   | 37.4   |        |        |

|        |        |        |         |        |        |        |        |         |        |         |         |         |         |         |         |         |         |         |         |         |         |         |         |         |        |        |        |       |
|--------|--------|--------|---------|--------|--------|--------|--------|---------|--------|---------|---------|---------|---------|---------|---------|---------|---------|---------|---------|---------|---------|---------|---------|---------|--------|--------|--------|-------|
| -0.16  | -0.24  | -2.51  | 1.81    | -2.92  | -3.39  | -5.94  | -2.94  | -1.28   | -2.52  | -2.48   | -0.50   | -0.42   | -1.54   | -1.11   | -0.47   | -0.43   | -0.89   | -1.60   | -0.53   | 0.50    | -0.01   | 0.52    | -1.19   | -0.54   | 0.98   | 0.73   | 0.20   |       |
| -0.62  | -0.59  | -1.62  | 0.26    | -0.83  | -1.28  | -0.50  | -0.31  | -1.96   | 1.25   | 0.27    | -0.21   | -0.96   | -0.63   | -0.26   | -0.22   | 1.32    | 0.23    | 0.30    | 0.05    | 0.30    | 0.37    | 0.18    | 0.32    | -0.11   | -0.96  | 0.66   | 0.99   |       |
| 5.14   | 3.74   | 1.41   | 3.60    | 2.51   | 4.33   | 4.70   | 4.50   | 3.20    | 3.56   | -1.16   | 1.09    | 0.50    | -0.25   | -0.20   | 0.86    | -0.51   | 0.81    | 2.24    | -2.51   | 1.14    | 0.45    | -0.06   | 0.07    | -0.20   | 3.49   | 2.72   | 3.19   |       |
| -0.70  | -1.29  | -5.11  | -1.40   | -3.03  | -2.64  | -2.82  | -1.68  | -5.48   | -4.16  | 8.05    | 8.57    | 8.86    | 6.59    | 7.46    | 7.72    | 6.89    | 7.03    | 6.20    | 6.88    | 5.10    | 5.55    | 4.91    | 6.34    | 6.03    | -1.34  | -0.03  | -0.05  |       |
| 3.28   | 2.66   | 3.62   | 4.44    | 4.42   | 3.92   | 6.16   | 5.55   | 2.81    | 5.61   | 1.94    | -1.24   | -1.21   | -2.01   | -0.95   | -1.53   | -0.44   | -0.74   | -0.87   | -0.84   | -0.46   | 0.46    | 0.26    | -1.21   | -1.71   | 2.57   | 3.20   | 3.08   |       |
| 1.54   | 2.76   | -1.14  | 1.32    | -0.36  | 0.52   | 0.14   | 1.17   | 0.66    | -0.46  | -1.44   | -1.66   | -2.74   | -1.68   | -3.64   | -2.18   | 1.14    | -1.12   | -1.18   | -1.26   | -1.46   | 0.19    | -0.98   | -0.55   | -0.18   | 0.05   | 1.53   | 1.98   |       |
| 8.41   | 9.03   | 10.05  | 9.84    | 4.96   | -0.56  | -2.77  | 2.98   | 12.55   | 3.14   | -0.99   | -0.53   | -0.70   | -0.66   | -0.35   | -0.71   | 0.25    | -1.27   | 0.17    | -1.84   | 0.89    | -1.13   | 2.66    | -0.97   | -0.32   | 7.50   | 6.22   | 6.59   |       |
| 9.38   | 9.15   | 11.32  | 9.31    | 3.71   | -4.68  | -13.26 | 2.03   | 14.52   | 1.20   | -0.56   | -0.31   | -0.26   | -0.26   | -0.81   | -0.46   | -0.52   | -0.59   | -0.38   | -0.77   | -0.59   | -0.46   | 1.71    | -1.18   | -0.60   | 9.51   | 8.00   | 7.69   |       |
| -24.93 | -25.25 | -29.74 | -23.15  | -39.86 | -42.98 | -50.97 | -43.66 | -36.62  | -40.22 | 1.97    | 1.94    | 4.12    | 2.16    | 4.02    | 2.03    | 2.68    | 1.70    | 2.31    | 1.33    | 4.21    | 3.93    | 4.51    | 3.44    | 1.69    | -21.03 | -18.15 | -27.16 |       |
| -9.97  | -10.01 | -12.39 | -14.96  | -10.92 | -14.81 | -11.17 | -11.58 | -13.97  | -11.81 | -1.11   | 0.88    | 2.30    | 1.79    | 2.42    | 0.07    | -1.05   | -2.06   | -2.64   | -1.10   | -1.52   | -0.51   | -1.47   | -1.36   | -1.46   | -9.90  | -7.87  | -6.83  |       |
| -18.67 | -17.73 | -16.03 | -27.90  | -20.65 | -22.66 | -20.27 | -21.31 | -21.77  | -18.74 | 2.64    | 4.12    | 5.24    | 6.75    | 7.11    | 4.37    | -1.74   | -1.90   | -2.63   | -2.78   | -0.65   | -0.13   | -0.25   | -1.39   | -0.81   | -16.85 | -12.83 | -12.23 |       |
| -0.08  | -0.77  | -1.97  | 1.76    | -2.70  | -5.60  | -6.33  | -1.74  | -1.07   | -2.60  | -0.03   | 1.54    | 1.81    | 0.90    | 1.07    | 0.13    | -2.98   | -0.15   | -1.31   | 0.18    | -1.03   | -1.25   | 0.50    | -2.19   | -0.36   | -0.81  | 3.02   | 4.21   |       |
| -33.28 | -33.75 | -23.82 | -26.45  | -31.06 | -30.11 | -30.61 | -33.70 | -32.39  | -34.27 | -34.02  | -36.81  | -36.09  | -27.89  | -25.45  | -30.44  | -26.89  | -26.26  | -25.66  | -24.20  | -22.26  | -24.01  | -20.92  | -20.51  | -22.37  | -22.83 | -23.88 | -29.29 |       |
| 3.39   | 3.78   | 1.67   | 2.69    | 3.99   | 3.03   | 3.06   | 2.50   | 3.18    | 4.57   | 3.73    | 4.49    | 3.66    | 1.79    | 2.68    | 3.02    | 2.32    | 2.73    | 1.46    | 1.84    | 2.81    | 2.13    | 2.38    | 0.64    | 1.99    | -0.54  | 4.30   | 4.33   |       |
| 8.07   | 9.35   | 3.29   | 5.52    | 7.38   | 2.33   | 4.12   | 4.31   | 6.16    | 7.56   | 3.46    | 4.48    | 4.29    | 2.82    | 1.11    | 3.49    | 3.66    | 5.17    | 3.64    | 2.70    | 2.00    | 3.67    | 1.96    | 0.70    | 3.21    | 3.23   | 6.41   | 7.61   |       |
| -1.56  | 0.43   | -0.29  | 0.84    | 1.16   | -1.61  | -1.77  | 0.70   | -0.93   | 1.20   | 0.67    | -0.48   | 0.19    | -1.14   | -0.57   | -2.37   | -0.18   | -2.03   | -0.71   | 0.39    | 0.34    | 0.83    | 1.16    | -0.18   | -1.24   | -0.42  | 0.25   | 0.72   |       |
| -0.28  | -0.76  | -0.10  | 1.18    | 0.25   | -1.47  | -0.23  | 0.71   | 1.01    | 0.82   | -2.75   | -2.63   | -2.52   | -3.77   | -3.06   | -1.53   | -0.61   | -0.52   | -1.09   | -1.03   | -1.11   | -1.26   | -1.58   | -2.32   | -0.67   | -0.51  | 0.72   | 0.32   |       |
| 1.32   | 2.85   | 1.25   | 0.71    | 0.03   | 2.70   | 1.82   | 3.03   | 1.83    | 1.62   | 1.05    | 1.79    | 3.02    | 1.05    | 1.41    | 1.49    | -1.14   | 1.01    | 0.54    | -0.39   | -0.09   | -1.20   | 0.41    | 1.25    | 0.92    | 0.70   | 1.94   | 3.46   |       |
| -10.33 | -9.24  | -39.06 | -68.52  | -41.23 | -35.27 | -45.36 | -57.38 | -68.22  | -46.61 | -120.77 | -127.68 | -130.40 | -101.17 | -110.89 | -144.21 | -91.55  | -89.25  | -85.81  | -84.63  | -88.25  | -80.83  | -89.20  | -100.69 | -111.29 | -46.03 | -65.59 | -40.31 |       |
| -22.19 | -19.03 | -55.66 | -84.07  | -56.97 | -50.22 | -63.20 | -72.86 | -84.11  | -60.97 | -127.34 | -134.24 | -133.87 | -111.91 | -118.37 | -145.68 | -102.25 | -104.25 | -100.27 | -106.97 | -102.48 | -98.26  | -97.35  | -113.08 | -117.36 | -61.74 | -84.68 | -58.84 |       |
| -41.43 | -34.18 | -72.75 | -100.06 | -77.31 | -71.35 | -88.94 | -92.31 | -107.04 | -77.71 | -130.51 | -137.73 | -142.09 | -118.03 | -122.21 | -143.43 | -115.71 | -119.24 | -114.06 | -122.00 | -113.72 | -112.63 | -111.72 | -126.41 | -123.21 | -75.97 | -99.92 | -73.90 |       |
| 7.25   | 5.58   | 1.17   | 5.65    | 1.06   | -6.47  | -8.18  | -4.68  | 2.96    | -7.47  | -1.24   | -2.05   | -2.10   | -1.48   | -1.70   | -3.65   | -3.80   | -2.46   | -3.74   | -2.24   | -3.39   | -2.06   | -1.49   | -1.44   | -2.30   | 4.92   | 6.81   | 4.64   |       |
| 7.80   | 7.43   | 0.99   | 7.68    | -2.69  | -8.91  | -11.19 | -8.83  | 0.82    | -10.26 | -3.68   | -0.76   | -2.77   | -1.60   | -2.46   | -4.07   | -2.29   | -2.58   | -3.94   | -3.80   | -3.77   | -1.02   | -1.72   | -3.04   | -3.37   | 6.30   | 6.52   | 6.00   |       |
| -18.14 | -14.44 | -16.48 | -18.71  | -16.86 | -18.79 | -17.16 | -15.26 | -14.23  | -15.08 | 12.01   | 12.53   | 8.84    | 7.52    | 10.03   | 13.24   | 13.46   | 13.74   | 12.66   | 13.79   | 11.84   | 9.03    | 9.45    | 10.49   | 11.59   | -15.35 | -19.94 | -14.34 |       |
| 4.41   | 4.53   | 2.98   | 9.76    | 2.21   | 1.71   | 1.15   | 2.62   | 2.39    | 2.04   | -0.66   | -2.38   | -3.79   | -3.47   | -2.32   | -4.53   | -0.62   | -1.32   | -2.25   | -2.11   | -2.24   | -2.17   | -0.40   | -1.60   | -2.55   | 6.14   | 7.69   | 6.39   |       |
| 43.63  | 44.37  | 46.72  | 51.17   | 54.01  | 47.78  | 59.81  | 45.87  | 53.82   | 50.91  | -5.63   | -9.97   | -13.48  | -13.48  | -13.79  | -12.00  | -6.37   | -9.34   | -8.09   | -8.43   | -10.70  | -9.79   | -4.57   | -8.82   | -9.48   | 40.14  | 38.20  | 44.43  |       |
| 0.54   | 0.21   | 4.18   | -1.48   | -2.37  | -0.79  | -8.87  | -1.16  | -0.68   | -0.23  | 0.63    | 0.28    | 1.29    | -1.19   | 0.06    | 1.01    | -1.07   | -1.47   | -1.12   | -0.99   | -3.77   | -4.40   | -0.20   | -2.37   | -2.97   | 0.01   | 0.89   | -1.95  | 1.21  |
| -3.21  | -2.20  | -2.27  | -3.50   | -2.78  | -2.32  | -1.80  | -3.59  | -4.09   | -2.16  | 6.11    | 4.72    | 6.20    | 6.19    | 4.25    | 3.29    | 5.73    | 5.38    | 6.96    | 6.42    | 5.94    | 6.10    | 5.96    | 6.42    | 5.94    | 6.14   | -2.38  | -1.02  | -1.88 |
| -3.40  | -3.23  | -2.99  | -4.70   | -4.77  | -3.21  | -2.87  | -2.73  | -3.77   | -2.65  | 5.61    | 4.97    | 5.17    | 4.10    | 3.79    | 4.83    | 4.74    | 4.05    | 3.58    | 3.53    | 3.92    | 3.51    | 3.46    | 3.72    | 2.73    | -4.36  | -1.61  | -3.57  |       |
| -1.10  | 1.48   | -1.98  | -1.18   | -1.41  | -0.72  | 0.28   | -0.26  | -1.50   | -1.21  | 2.07    | 2.81    | 1.92    | 1.37    | 1.97    | 1.18    | 2.30    | 1.15    | 0.77    | 1.87    | 1.53    | 2.83    | 2.20    | 1.86    | 2.28    | -1.03  | -0.42  | 0.91   |       |
| 4.30   | 7.79   | 3.68   | 4.34    | 3.37   | 3.04   | 6.76   | 7.70   | 4.13    | 7.52   | -13.07  | -11.65  | -15.97  | -12.86  | -10.55  | -11.78  | -10.13  | -4.92   | -8.55   | -6.12   | -7.57   | -9.19   | -7.74   | -7.03   | -6.71   | 3.59   | 7.56   | 7.83   |       |
| 11.69  | 11.52  | 9.92   | 8.33    | 8.82   | 13.22  | 16.58  | 19.14  | 12.76   | 16.85  | -30.75  | -23.45  | -32.21  | -25.79  | -19.29  | -24.05  | -19.59  | -9.99   | -18.12  | -19.03  | -17.35  | -13.37  | -12.02  | -15.86  | 9.47    | 9.21   | 10.59  | 10.59  |       |
| 0.16   | -1.27  | -2.95  | 0.23    | -1.08  | -9.97  | -12.19 | -11.99 | -5.41   | -12.31 | 9.29    | 7.97    | 9.12    | 7.24    | 5.74    | 7.37    | 6.99    | 2.82    | 3.92    | 6.30    | 5.19    | 4.99    | 3.62    | 3.55    | 3.65    | -2.91  | -0.53  | -0.98  |       |
| 3.09   | 0.54   | -1.18  | 1.44    | -0.67  | -0.54  | -3.26  | 0.62   | -1.09   | -1.54  | -9.75   | -11.26  | -8.83   | -9.17   | -9.86   | -10.14  | -3.86   | -4.44   | -5.20   | -3.09   | -4.43   | -4.18   | -5.31   | -8.59   | -1.27   | 0.13   | -1.45  |        |       |
| 3.87   | -0.92  | -5.11  | -3.48   | -5.90  | -5.14  | -8.51  | -6.43  | -7.81   | -6.24  | -28.68  | -33.29  | -33.26  | -26.89  | -28.07  | -13.79  | -11.73  | -11.84  | -13.41  | -12.99  | -12.77  | -14.08  | -13.29  | -20.35  | -2.60   | -3.63  | -5.37  |        |       |
| 2.50   | 9.36   | -14.89 | -14.72  | -22.14 | -17.92 | -26.05 | -20.80 | -25.18  | -12.50 | -53.43  | -58.68  | -69.79  | -54.46  | -52.58  | -48.53  | -31.61  | -27.39  | -28.01  | -22.06  | -23.80  | -26.43  | -30.08  | -28.65  | -34.42  | -11.93 | -13.89 | -19.42 |       |
| 10.97  | 12.12  | 8.62   | 15.51   | 4.59   | -5.46  | -8.70  | -3.68  | 6.93    | -1.23  | -4.04   | -4.10   | -4.10   | -3.74   | -6.20   | -10.42  | -5.60   | -5.86   | -5.28   | -6.27   | -5.24   | -5.65   | -3.19   | -4.58   | -6.09   | 8.95   | 16.62  | 13.85  |       |
| 12.55  | 11.54  | 8.61   | 13.08   | 3.93   | -6.87  | -11.55 | -6.83  | 5.96    | -3.31  | -8.12   | -6.79   | -6.66   | -9.16   | -8.99   | -14.51  | -4.68   | -7.86   | -6.94   | -8.46   | -6.90   | -6.70   | -4.59   | -6.77   | -8.37   | 9.83   | 18.48  | 16.51  |       |
| -5.66  | -5.45  | -4.75  | -7.07   | -5.10  | -6.85  | -11.36 | -10.89 | -3.43   | -7.77  | 4.17    | 7.19    | 2.82    | 6.03    | 6.99    | 9.37    | 4.49    | 5.85    | 4.28    | 4.62    | 3.94    | 3.20    | 5.39    | 4.79    | 4.76    | -5.31  | -10.08 | -7.31  |       |
| -0.52  | 1.03   | -1.35  | 1.65    | -2.09  | -2.27  | -3.84  | -1.61  | -1.37   | -2.68  | -0.08   | 0.58    | -0.08   | -1.83   | -1.60   | -0.94   | 1.32    | -0.28   | -0.99   | -1.63   | -0.27   | 0.13    | 0.78    | -0.23   | 0.24    | -1.58  | 1.41   | 2.94   |       |
| -0.54  | -0.59  | -1.94  | -0.38   | -1.98  | -1.41  | -2.88  | -1.97  | -1.38   | -1.37  | 2.16    | 1.26    | 0.42    | -1.55   | -0.51   | -1.34   | 1.10    | 1.84    | -0.39   | 0.73    | 0.06    | 0.62    | 0.49    | 0.58    | 0.29    | -2.60  | 0.21   | 0.92   |       |
| 4.52   | 3.63   | 2.74   | 0.89    | 2.19   | 2.93   | -0.27  | 1.99   | 0.36    | 0.33   | -1.50   | -1.45   | -0.87   | 0.24    | -1.52   | 0.67    | -0.84   | -0.78   | 0.14    | -1.13   | -0.55   | 0.18    | 0.03    | 1.55    | -1.00   | 1.51   | 1.60   | 3.04   |       |
| 17.70  | 17.50  | 18.24  | 22.25   | 20.32  | 17.46  | 18.49  | 22.29  | 19.92   | 22.14  | -2.02   | -3.13   | -4.10   | -4.79   | -7.14   | -6.19   | -2.80   | -3.29   | -3.74   | -3.66   | -2.77   | -3.73   | -2.61   | -1.50   | -4.31   | 15.02  | 18.27  | 18.92  |       |
| 40.29  | 43.65  | 38.83  | 37.64   | 49.52  | 38.02  | 32.47  | 45.43  | 54.59   | 36.11  | -4.51   | -3.45   | -6.36   | -6.11   | -8.14   | -8.25   | -5.33   | -5.23   | -6.76   | -6.00   | -7.05   | -5.83   | -2.11   | -6.23   | -6.16   | 37.86  | 31.19  | 44.35  |       |
| -16.70 | -18.33 | -20.60 | -19.40  | -23.04 | -28.10 | -34.50 | -27.03 | -23.52  | -34.44 | 3.89    | 8.17    | 7.00    | 5.34    | 6.21    | 5.86    | 6.31    | 8.82    | 5.72    | 6.11    | 7.52    | 6.14    | 5.96    | 5.73    | 4.81    | -13.83 | -13.21 | -15.12 |       |
| -13.58 | -12.09 | -54.48 | -74.55  | -51.78 | -51.50 | -56.94 | -61.19 | -82.23  | -54.75 | -124.23 | -108.98 | -136.30 | -97.25  | -104.36 | -125.74 | -92.86  | -88.52  | -86.14  | -89.34  | -86.53  | -83.76  | -87.24  | -94.14  | -99.91  | -50.28 | -80.35 | -63.40 |       |
| -25.90 | -16.76 | -66.34 | -88.60  | -66.19 | -64.27 | -71.05 | -77.87 | -96.34  | -69.38 | -124.77 | -115.55 |         |         |         |         |         |         |         |         |         |         |         |         |         |        |        |        |       |

|        |        |         |         |         |         |         |         |         |         |         |         |         |         |         |         |         |         |         |         |         |         |         |         |         |        |         |         |      |      |
|--------|--------|---------|---------|---------|---------|---------|---------|---------|---------|---------|---------|---------|---------|---------|---------|---------|---------|---------|---------|---------|---------|---------|---------|---------|--------|---------|---------|------|------|
| -1.33  | -1.22  | -4.15   | -2.43   | -2.73   | -3.09   | -2.68   | -2.51   | -4.93   | -3.46   | 8.07    | 8.52    | 8.58    | 6.66    | 7.43    | 8.92    | 6.85    | 7.62    | 6.40    | 6.14    | 5.42    | 5.59    | 5.79    | 6.36    | 6.18    | -0.99  | 0.06    | 0.83    |      |      |
| 2.90   | 3.05   | 4.55    | 4.77    | 3.86    | 3.72    | 5.23    | 5.63    | 2.57    | 4.78    | -1.88   | -1.69   | -1.40   | -2.26   | -0.49   | -1.79   | -0.21   | -0.89   | -0.91   | -1.23   | -0.46   | -0.41   | -0.05   | -0.93   | -1.36   | 2.21   | 3.74    | 2.98    |      |      |
| 1.46   | 2.45   | 2.21    | 1.06    | 0.15    | -0.44   | -0.25   | -0.17   | 0.79    | 0.24    | -0.75   | -2.25   | -3.07   | -1.66   | -3.72   | -1.41   | -1.58   | 0.09    | -1.04   | -0.57   | -2.47   | 0.17    | -1.53   | -1.43   | -0.72   | -0.39  | 1.63    | 1.46    |      |      |
| 9.63   | 9.01   | 9.67    | 8.90    | 5.27    | 0.54    | -1.68   | 3.32    | 13.68   | 5.79    | 0.64    | -0.34   | -0.92   | -1.55   | -0.37   | 1.29    | 0.07    | -1.04   | 0.06    | -1.89   | 0.97    | -1.24   | 2.93    | -0.79   | -0.59   | 8.59   | 6.30    | 7.83    |      |      |
| 9.74   | 8.84   | 10.67   | 9.13    | 3.89    | -5.35   | -10.87  | -5.17   | -0.87   | 2.42    | 14.86   | 0.37    | -0.87   | 0.29    | -0.80   | -0.97   | -0.06   | 1.66    | -0.34   | -0.58   | -0.37   | -0.95   | -0.92   | -0.92   | 2.01    | -0.79  | -1.35   | 9.75    | 7.61 | 8.34 |
| -23.77 | -26.06 | -31.33  | -22.06  | -40.69  | -43.86  | -51.41  | -43.27  | -37.17  | -41.01  | 2.60    | 4.04    | 3.90    | 3.42    | 3.63    | 4.29    | 3.10    | 1.50    | 2.99    | 0.36    | 4.70    | 3.45    | 4.54    | 2.86    | 2.41    | -20.06 | -20.62  | -27.59  |      |      |
| -10.41 | -10.22 | -10.95  | -16.52  | -12.17  | -16.36  | -12.51  | -11.92  | -14.13  | -13.13  | -0.06   | 0.79    | 0.89    | 1.18    | 3.54    | 2.30    | -1.00   | -1.41   | -2.19   | -1.77   | -1.02   | -0.74   | 0.37    | -0.26   | -1.72   | -9.92  | -7.50   | -5.76   |      |      |
| -18.97 | -17.62 | -16.27  | -27.79  | -21.94  | -24.29  | -21.12  | -22.10  | -22.61  | -19.72  | 3.58    | 4.75    | 6.70    | 7.03    | 7.55    | 5.84    | -0.20   | -0.79   | -2.07   | -1.52   | 0.56    | 0.79    | -0.55   | -0.59   | -0.10   | -17.83 | -13.56  | -12.39  |      |      |
| -0.04  | 0.61   | -2.18   | 0.83    | -3.52   | -5.85   | -7.87   | -2.53   | -1.06   | -4.52   | 1.08    | 1.20    | 1.92    | 1.50    | 1.89    | 1.18    | -2.09   | -1.01   | -1.65   | -1.26   | -0.21   | -1.48   | 1.41    | -0.46   | -1.03   | 1.01   | 2.75    | 4.87    |      |      |
| -33.01 | -36.06 | -25.52  | -28.39  | -32.77  | -30.91  | -33.29  | -36.32  | -33.59  | -36.15  | -34.53  | -37.75  | -37.76  | -30.05  | -28.03  | -30.97  | -28.07  | -26.80  | -26.48  | -25.22  | -23.81  | -25.27  | -21.46  | -19.63  | -23.41  | -23.98 | -24.66  | -30.15  |      |      |
| 3.64   | 4.10   | 2.32    | 2.74    | 3.95    | 3.13    | 2.71    | 2.46    | 2.55    | 4.06    | 4.56    | 4.38    | 3.12    | 1.75    | 2.76    | 3.01    | 2.19    | 2.40    | 1.12    | 1.39    | 2.29    | 2.28    | 1.92    | 1.43    | 2.05    | 1.44   | 3.39    | 4.48    |      |      |
| 8.83   | 8.91   | 3.00    | 6.66    | 7.40    | 3.06    | 4.51    | 3.80    | 5.93    | 7.98    | 4.58    | 5.39    | 5.52    | 2.68    | 2.15    | 4.22    | 5.21    | 4.57    | 4.52    | 4.57    | 1.88    | 3.39    | 1.57    | 2.26    | 3.54    | 4.14   | 7.88    | 8.49    |      |      |
| -1.30  | -1.60  | -0.79   | 1.98    | 1.67    | -0.81   | -2.32   | 0.63    | -1.19   | 0.52    | 0.91    | 0.01    | -0.46   | -1.17   | -0.90   | -1.78   | 0.19    | -3.38   | -0.18   | -0.29   | -0.23   | -0.23   | 1.19    | -0.56   | -0.72   | -0.48  | 0.98    | 0.91    |      |      |
| 0.59   | -0.34  | 0.12    | 0.85    | -0.07   | -1.55   | -0.51   | -0.30   | 0.60    | 0.59    | -3.64   | -3.03   | -3.10   | -3.74   | -2.66   | -1.50   | -0.53   | -0.34   | -1.04   | -1.33   | -1.18   | -1.27   | -1.38   | -1.62   | -1.10   | -0.63  | -0.55   | 0.75    |      |      |
| 2.48   | 1.70   | 0.94    | 1.55    | 1.07    | 2.74    | 0.98    | 4.58    | 0.90    | 0.57    | 1.76    | 2.06    | 2.99    | 1.64    | 0.10    | 1.74    | 1.62    | 1.25    | 1.94    | -0.80   | 1.01    | -0.88   | 0.61    | 1.06    | 1.22    | 0.77   | 4.06    | 2.99    |      |      |
| -33.06 | -25.65 | -56.24  | -90.84  | -60.77  | -60.39  | -74.01  | -79.26  | -87.69  | -68.22  | -124.94 | -130.91 | -135.59 | -107.91 | -113.86 | -147.56 | -98.45  | -97.70  | -96.29  | -101.19 | -94.74  | -89.26  | -96.35  | -106.79 | -116.01 | -59.75 | -79.39  | -55.74  |      |      |
| -51.05 | -40.33 | -73.22  | -104.03 | -77.51  | -74.89  | -86.42  | -93.19  | -101.88 | -80.49  | -128.94 | -136.63 | -138.22 | -115.61 | -119.57 | -148.91 | -107.69 | -110.93 | -107.62 | -111.77 | -107.29 | -104.21 | -102.57 | -117.15 | -120.15 | -76.05 | -98.05  | -73.82  |      |      |
| -78.88 | -64.98 | -92.70  | -116.35 | -99.14  | -97.14  | -108.64 | -111.92 | -123.40 | -98.84  | -132.41 | -140.31 | -143.70 | -121.37 | -122.79 | -144.46 | -118.14 | -122.56 | -117.61 | -125.90 | -116.12 | -116.65 | -115.40 | -127.71 | -124.17 | -89.37 | -110.03 | -87.38  |      |      |
| 7.10   | 6.58   | 0.97    | 5.32    | 0.69    | -7.15   | -7.65   | -5.02   | 1.77    | -6.65   | -0.93   | -1.90   | -2.20   | -1.53   | -0.93   | -3.51   | -3.05   | -2.92   | -3.52   | -2.52   | -4.19   | -1.98   | -1.16   | -2.86   | -2.30   | 5.42   | 6.59    | 4.84    |      |      |
| 7.21   | 7.81   | 1.37    | 7.88    | -2.21   | -8.61   | -11.28  | -8.12   | 1.70    | -9.90   | -3.54   | -1.41   | -2.71   | -1.58   | -2.56   | -4.17   | -2.75   | -2.40   | -3.68   | -4.10   | -3.29   | -1.43   | -2.27   | -2.86   | -3.69   | 6.05   | 6.34    | 6.32    |      |      |
| -16.86 | -14.57 | -15.23  | -18.26  | -16.09  | -19.54  | -17.08  | -15.10  | -14.23  | -14.50  | 12.03   | 13.67   | 9.20    | 7.52    | 10.76   | 12.81   | 14.83   | 13.86   | 12.28   | 13.65   | 11.17   | 8.81    | 10.22   | 10.83   | 13.10   | -15.00 | -20.61  | -14.80  |      |      |
| 4.59   | 4.67   | 3.79    | 10.38   | 2.93    | 3.35    | 0.34    | 2.43    | 2.36    | 2.60    | -0.62   | -2.63   | -4.61   | -3.88   | -1.88   | -3.85   | -0.04   | -2.10   | -1.68   | -1.59   | -2.92   | -2.44   | -0.96   | -2.65   | -3.07   | 5.50   | 8.79    | 7.75    |      |      |
| 44.08  | 46.21  | 45.55   | 49.71   | 53.32   | 48.83   | 59.82   | 50.68   | 53.55   | 51.02   | -6.19   | -10.85  | -15.12  | -14.31  | -14.54  | -13.67  | -7.92   | -10.30  | -9.82   | -9.99   | -12.04  | -10.72  | -5.74   | -9.13   | -10.69  | 40.64  | 37.86   | 45.31   |      |      |
| 0.92   | -0.26  | 2.43    | -0.16   | -2.68   | 0.45    | -10.47  | 0.74    | -2.12   | -2.61   | -0.64   | -0.60   | -1.28   | -0.50   | 1.16    | 1.47    | -1.34   | -2.19   | -2.62   | -1.66   | -2.30   | -2.84   | -1.31   | -3.23   | 0.21    | 8.00   | -1.88   | 2.13    |      |      |
| -2.86  | -2.79  | -1.81   | -3.68   | -3.86   | -2.83   | -2.61   | -3.21   | -4.10   | -3.71   | 5.85    | 4.69    | 5.63    | 5.52    | 4.65    | 3.77    | 5.86    | 7.41    | 6.30    | 5.74    | 3.70    | 6.15    | 6.80    | 5.50    | 6.10    | -2.64  | -1.54   | -2.07   |      |      |
| -3.94  | -2.90  | -2.17   | -4.14   | -4.82   | -3.28   | -2.86   | -2.93   | -4.14   | -2.75   | 5.39    | 4.37    | 5.46    | 4.45    | 4.72    | 4.46    | 5.40    | 3.44    | 3.92    | 4.10    | 3.92    | 3.60    | 3.49    | 3.91    | 3.39    | -4.52  | -1.61   | -3.55   |      |      |
| -0.32  | 0.43   | -2.90   | -0.92   | -1.23   | -0.28   | -0.88   | -0.46   | -0.92   | -0.79   | 4.07    | 2.47    | 1.98    | 0.77    | 2.70    | 1.92    | 1.34    | 1.38    | 1.25    | 1.72    | 1.61    | 2.77    | 1.42    | 1.57    | 1.95    | -1.10  | 0.24    | 1.17    |      |      |
| 4.58   | 6.99   | 3.28    | 4.14    | 3.75    | 3.69    | 7.06    | 6.66    | 3.93    | 6.81    | -14.20  | -11.92  | -17.56  | -13.49  | -11.14  | -12.38  | -10.42  | -5.10   | -9.79   | -7.24   | -7.32   | -8.96   | -6.75   | -5.68   | -6.95   | 3.07   | 7.14    | 8.76    |      |      |
| 11.59  | 11.92  | 9.72    | 7.54    | 9.19    | 13.75   | 15.95   | 19.21   | 12.68   | 16.99   | -31.84  | -24.33  | -32.91  | -26.54  | -19.87  | -24.20  | -20.33  | -10.17  | -19.32  | -18.65  | -19.23  | -18.03  | -14.31  | -12.49  | -16.24  | 10.01  | 9.41    | 11.03   |      |      |
| -0.25  | -0.63  | -3.12   | 0.38    | -2.85   | -9.66   | -10.47  | -11.12  | -4.26   | -11.44  | 11.10   | 8.36    | -9.88   | 6.81    | 4.02    | 7.44    | 6.72    | 2.90    | 4.43    | 7.21    | 5.62    | 5.03    | 3.75    | 3.66    | 3.86    | -0.94  | -0.30   | -0.73   |      |      |
| 2.11   | -0.89  | -1.09   | 0.01    | -1.28   | -0.18   | -4.18   | -1.02   | -2.71   | -1.94   | -11.85  | -12.79  | -11.84  | -9.66   | -11.32  | -9.74   | -5.98   | -6.19   | -3.64   | -7.30   | -7.22   | -5.94   | -5.98   | -6.14   | -10.39  | -0.70  | 0.24    | -0.65   |      |      |
| 2.86   | -2.15  | -6.26   | -5.12   | -7.68   | -8.36   | -13.63  | -10.31  | -11.05  | -8.89   | -32.50  | -37.25  | -38.21  | -30.17  | -29.81  | -31.50  | -17.54  | -15.95  | -16.26  | -19.04  | -17.93  | -16.77  | -17.21  | -17.14  | -24.95  | -5.45  | -5.44   | -6.72   |      |      |
| 0.44   | -11.67 | -19.24  | -18.11  | -26.18  | -22.00  | -34.91  | -26.41  | -32.06  | -29.68  | -57.94  | -63.34  | -76.40  | -60.49  | -57.80  | -53.31  | -38.92  | -32.92  | -34.77  | -28.35  | -30.65  | -33.90  | -36.59  | -34.54  | -39.99  | -15.74 | -17.06  | -22.02  |      |      |
| 10.20  | 11.62  | 9.37    | 15.77   | 4.88    | -5.92   | -8.35   | -4.23   | 7.03    | -2.06   | -4.26   | -4.80   | -5.57   | -4.49   | -6.50   | -10.32  | -5.73   | -5.73   | -5.20   | -6.63   | -5.16   | -5.92   | -3.21   | -5.08   | -6.75   | 8.63   | 15.78   | 13.64   |      |      |
| 12.27  | 10.58  | 7.77    | 12.89   | 3.17    | -6.87   | -10.24  | -7.18   | 6.94    | -3.45   | -7.93   | -8.02   | -6.83   | -8.85   | -8.97   | -15.28  | -4.94   | -7.92   | -7.12   | -9.47   | -6.96   | -6.35   | -4.74   | -6.93   | -8.73   | 9.37   | 18.15   | 16.31   |      |      |
| -5.90  | -5.49  | -5.50   | -7.35   | -5.48   | -6.76   | -11.28  | -11.10  | -5.73   | -8.63   | 5.30    | 6.99    | 3.85    | 6.35    | 6.58    | 8.48    | 4.80    | 4.79    | 4.91    | 4.53    | 5.06    | 2.81    | 4.44    | 5.00    | 4.60    | -5.30  | -9.80   | -8.14   |      |      |
| -0.97  | 0.66   | -0.82   | 0.19    | -2.01   | -3.14   | -4.13   | -0.99   | -1.58   | -2.28   | 0.24    | 0.55    | -1.23   | -2.58   | -1.65   | -2.64   | 0.37    | -0.70   | -0.98   | -0.80   | 0.12    | 0.04    | 0.76    | 2.05    | -0.53   | -1.53  | 2.28    | 2.85    |      |      |
| -1.01  | 0.45   | -1.07   | -0.62   | -2.60   | -1.64   | -3.22   | -2.02   | -1.66   | -2.27   | 1.57    | 0.14    | 0.62    | -1.33   | -0.53   | -0.51   | 1.21    | 1.43    | -0.33   | 0.39    | -0.14   | 0.76    | 0.40    | 0.43    | 0.16    | -2.00  | 0.02    | 0.99    |      |      |
| 4.51   | 2.27   | 2.70    | 1.30    | 1.47    | 2.51    | -1.16   | 0.42    | 0.77    | 0.87    | -0.82   | -1.41   | -1.77   | 0.31    | -1.40   | -0.20   | -0.72   | -0.79   | -0.16   | -0.34   | 0.42    | 1.11    | 0.41    | -1.03   | -2.18   | 1.63   | 1.97    | 3.40    |      |      |
| 18.99  | 18.62  | 19.58   | 22.30   | 19.56   | 17.70   | 19.43   | 23.06   | 18.39   | 22.15   | -2.25   | -3.84   | -6.10   | -6.03   | -5.91   | -7.75   | -2.55   | -3.59   | -3.56   | -3.45   | -3.63   | -3.79   | -2.62   | -3.19   | -3.77   | 15.42  | 17.84   | 20.01   |      |      |
| 40.63  | 45.98  | 40.98   | 37.66   | 49.01   | 40.40   | 35.30   | 47.27   | 56.33   | 39.77   | -4.72   | -4.61   | -7.14   | -5.79   | -9.13   | -8.97   | -6.36   | -5.97   | -7.29   | -6.73   | -7.50   | -6.10   | -2.71   | -6.90   | -7.54   | 38.95  | 31.99   | 45.29   |      |      |
| -16.93 | -16.77 | -20.42  | -18.57  | -25.07  | -27.71  | -34.91  | -27.52  | -24.66  | -32.78  | 4.00    | 7.81    | 8.19    | 6.22    | 5.89    | 6.67    | 7.49    | 5.22    | 5.81    | 6.66    | 9.01    | 5.82    | 7.99    | 6.46    | 5.07    | -14.43 | -13.76  | -13.40  |      |      |
| -37.61 | -25.99 | -75.51  | -96.97  | -72.00  | -72.26  | -84.54  | -85.61  | -102.68 | -78.39  | -125.30 | -111.08 | -136.66 | -99.89  | -104.42 | -127.07 | -98.88  | -93.86  | -91.24  | -93.83  | -92.38  | -89.21  | -92.45  | -98.14  | -101.24 | -64.77 | -96.18  | -80.99  |      |      |
| -56.57 | -38.34 | -87.01  | -108.90 | -86.90  | -86.44  | -97.01  | -99.39  | -113.49 | -90.12  | -125.50 | -117.74 | -139.87 | -107.19 | -107.73 | -125.82 | -106.61 | -104.26 | -102.53 | -102.70 | -104.55 | -102.43 | -95.74  | -105.60 | -103.03 | -82.19 | -108.95 | -97.43  |      |      |
| -81.19 | -61.31 | -107.09 | -111.92 | -103.94 | -104.57 | -112.36 | -115.36 | -131.64 | -108.01 | -125.50 | -114.85 | -140.11 | -114.74 | -110.74 | -126.38 | -118.68 | -112.71 | -111.50 | -111.92 | -112.59 | -114.87 | -103.67 | -113.35 | -108.38 | -96.20 | -120.97 | -111.12 |      |      |
| 9.13   | 11.45  | 11.41   | 13.36   | 5.95    | 6.75    | 3.46    | 6.04    | 9.23    | 2.72    | -3.94   | -1.63   | -3.91   | -3.30   | -3.37   | -3.29   | -4.51   | -5.68   | -4.32   | -5.12   | -5.32   | -5.07   | -5.69   | -4.92   | -6.17   | 8.52   | 14      |         |      |      |

| 137      | 138      | 139      | 140      | 141      | 142      | 143      | 144      | 145      | 146      | 147      | 148      | 149      | 150      | 151      | 152      | 153      | 154      | 155      | 156      | 157      | 158      | 159      | 160      | 161      | 162      | 163      | 164      |
|----------|----------|----------|----------|----------|----------|----------|----------|----------|----------|----------|----------|----------|----------|----------|----------|----------|----------|----------|----------|----------|----------|----------|----------|----------|----------|----------|----------|
| E.       |
| faecalis |
| 4        | 5        | 6        | 7        | 8        | 9        | 10       | 11       | 12       | 13       | 14       | 15       | 16       | 1        | 2        | 3        | 4        | 5        | 6        | 7        | 8        | 9        | 10       | 11       | 12       | 13       | 14       | 15       |
| -0.46    | 0.89     | 0.32     | -0.19    | -0.24    | -1.08    | -0.60    | 0.99     | -0.48    | 1.52     | -0.21    | 0.32     | 0.00     | -0.79    | -0.83    | 0.37     | 1.50     | -0.21    | 0.68     | 1.81     | 0.44     | -1.74    | 0.90     | -0.45    | 0.66     | -0.39    | 0.00     | 0.20     |
| 0.03     | 0.06     | -0.21    | 0.98     | 0.17     | -0.39    | -0.88    | -0.33    | 0.00     | -0.59    | 0.18     | 0.20     | -0.16    | 0.03     | 0.82     | 0.23     | 0.52     | 0.46     | 0.00     | 0.41     | 0.13     | 0.83     | 0.84     | -0.06    | 0.39     | 0.90     | 0.05     | -0.13    |
| 0.35     | 1.16     | -0.17    | 0.44     | -1.55    | 1.04     | 0.57     | -0.16    | -0.32    | 0.92     | 1.52     | 0.53     | -0.10    | 0.79     | 0.34     | -0.06    | 1.19     | -0.06    | 0.02     | 0.48     | 1.54     | 1.10     | -1.78    | 1.27     | 0.80     | 0.00     | 0.03     | 0.90     |
| 1.48     | 0.54     | 0.43     | 0.72     | 0.36     | 0.48     | -0.37    | -0.39    | 0.56     | 0.28     | -0.86    | -0.11    | -0.01    | -0.30    | -0.43    | -0.66    | -0.33    | 0.63     | 0.31     | 0.94     | -0.70    | -0.85    | -0.89    | 0.08     | -0.20    | 0.42     | -0.35    | 0.47     |
| -0.62    | 0.73     | 0.26     | 0.76     | 0.02     | 0.50     | 0.41     | 1.28     | -0.65    | -0.21    | 0.06     | -0.73    | -0.48    | -0.64    | -0.10    | -0.66    | 0.86     | 1.00     | -0.28    | 0.72     | 0.17     | 0.41     | -1.04    | -0.13    | -0.85    | 0.37     | 0.25     | 0.01     |
| 0.70     | -0.71    | 1.55     | 1.46     | 0.34     | -0.41    | -1.07    | -0.90    | 0.91     | -0.16    | -1.95    | -0.17    | 1.06     | 0.19     | 0.99     | 0.94     | -1.87    | -0.21    | -0.19    | -2.10    | -0.38    | -0.68    | -1.96    | -2.08    | -2.58    | -1.90    | -2.11    | -2.22    |
| -0.07    | 0.61     | -1.08    | -0.63    | -1.01    | 0.05     | 0.24     | 1.62     | -0.78    | 0.88     | -0.59    | -1.11    | -1.30    | -0.41    | 0.69     | -0.58    | 1.95     | 0.26     | -0.28    | -1.41    | -2.38    | -0.21    | 0.66     | -2.00    | 0.02     | 0.21     | -0.89    | -0.29    |
| 0.36     | 0.77     | -0.05    | 1.16     | 0.38     | 0.03     | -0.03    | 1.50     | 0.24     | -0.50    | 0.30     | 0.40     | 0.44     | 0.21     | 0.97     | 0.88     | 0.75     | 0.50     | 1.26     | 1.06     | 0.68     | -0.22    | 0.86     | 0.64     | -0.27    | 1.03     | 2.02     | 0.12     |
| 0.82     | 1.07     | 1.34     | -0.26    | 0.32     | -0.31    | -0.68    | 2.32     | 1.04     | 0.27     | 1.13     | 0.48     | 1.62     | 1.77     | 1.04     | 1.27     | 1.60     | 1.50     | 1.47     | 0.95     | 1.24     | 0.46     | 0.66     | 0.42     | 0.77     | -1.22    | 0.77     | 1.49     |
| 0.80     | 0.06     | 0.97     | 1.18     | 1.13     | -0.02    | 0.62     | 0.96     | 1.71     | 0.10     | -1.28    | 0.10     | 1.30     | 0.83     | -0.93    | 0.73     | -0.03    | 0.77     | 0.44     | -0.83    | 0.75     | 1.11     | 1.30     | -1.25    | 2.45     | 1.92     | -1.57    | 2.42     |
| 2.08     | -1.73    | 0.22     | 1.90     | 0.52     | -0.85    | 0.28     | 1.08     | 0.52     | -1.08    | -1.26    | -1.16    | 0.53     | -3.53    | -0.67    | -0.30    | -4.06    | 0.14     | -0.66    | -1.11    | -0.63    | 1.99     | -0.42    | -7.64    | -11.26   | -1.61    | -3.07    | 4.41     |
| 0.88     | -1.48    | -0.28    | 0.61     | 1.49     | 0.72     | 0.16     | 1.36     | 0.29     | 0.97     | -0.08    | -0.82    | 1.08     | -1.19    | 0.97     | -1.33    | -1.90    | 0.84     | 1.15     | -1.03    | 1.62     | 0.66     | -0.63    | -4.05    | -6.38    | 0.26     | 0.30     | 5.01     |
| 2.05     | -0.11    | 1.49     | 0.17     | 0.04     | 0.41     | -0.16    | 1.63     | -1.88    | -3.08    | -2.76    | 0.28     | -0.47    | -0.98    | 0.30     | -2.50    | -4.86    | -2.51    | -1.88    | -3.91    | -4.10    | -0.09    | -5.93    | -1.86    | 0.19     | -3.07    | -4.70    | -5.63    |
| -0.07    | -1.28    | -0.32    | 0.40     | -1.10    | -1.03    | -0.06    | -1.10    | -3.20    | -3.36    | -3.13    | -0.96    | -2.65    | -1.91    | -0.20    | -2.64    | -1.34    | -2.77    | -2.59    | -2.52    | -5.22    | -0.62    | -3.28    | 2.35     | 3.61     | -3.32    | -3.96    | -4.20    |
| 0.59     | 0.19     | -0.09    | -0.66    | -0.25    | -1.17    | -0.80    | -0.37    | 0.08     | 0.14     | -3.05    | -1.29    | -1.16    | -0.56    | -0.25    | 0.83     | 0.76     | 0.91     | -1.72    | -0.08    | -0.61    | 0.00     | 0.46     | 1.03     | -0.61    | 0.26     | 0.34     | -0.28    |
| 3.03     | 0.77     | 0.92     | 0.97     | 0.46     | 1.43     | 1.40     | 0.34     | 0.21     | 1.61     | 0.77     | 1.74     | 1.32     | 0.90     | 1.28     | 0.51     | 0.70     | 1.80     | 1.13     | 1.50     | -0.90    | -0.07    | -0.03    | -1.21    | -0.19    | 1.71     | 0.58     | -0.26    |
| -1.17    | -0.56    | 0.22     | -0.47    | -1.01    | -0.78    | -0.85    | -0.31    | -0.39    | -1.30    | -1.01    | -0.41    | -0.34    | -0.68    | -0.68    | -0.41    | 0.18     | -0.45    | 0.46     | -0.40    | 0.14     | 0.07     | -0.84    | -0.82    | -0.26    | -0.33    | -0.22    | 0.09     |
| 1.62     | 0.75     | 1.52     | 1.60     | -0.20    | 1.20     | -0.12    | 1.84     | 0.31     | -0.06    | 0.72     | 0.25     | 0.74     | 0.58     | 1.21     | 0.73     | 1.87     | 0.31     | 1.37     | 1.84     | 0.12     | 0.81     | 0.65     | -0.50    | 1.57     | -0.71    | 0.03     | -0.37    |
| -1.01    | -0.83    | -0.83    | -0.41    | 0.27     | 0.04     | -0.36    | 0.03     | -1.42    | -2.98    | -0.20    | -1.96    | -0.81    | -1.06    | -0.80    | -0.68    | -1.38    | -0.08    | -1.07    | -0.12    | -1.10    | -2.37    | -1.34    | -1.59    | 0.19     | -1.04    | -1.84    | -0.69    |
| -1.08    | -0.70    | -0.85    | -1.64    | -0.38    | 0.00     | -0.47    | 0.78     | -0.14    | -0.99    | 0.31     | -0.22    | -0.49    | -0.81    | -1.19    | -0.17    | 0.28     | -0.23    | 0.04     | -0.51    | -0.75    | -0.78    | -0.19    | -0.97    | 0.05     | -0.88    | -0.23    | -0.56    |
| -0.69    | -0.26    | 0.01     | -0.60    | -0.40    | -0.14    | 0.50     | 0.19     | -0.43    | -1.58    | 0.08     | -1.11    | -1.33    | 0.33     | 0.09     | -2.11    | -1.22    | 1.15     | -0.26    | 0.88     | -1.34    | 0.01     | -0.96    | -0.49    | 1.27     | 0.22     | 0.16     | -1.19    |
| 1.37     | 1.06     | 0.59     | 1.22     | 0.81     | 1.26     | 0.48     | 0.54     | 0.37     | 1.07     | -0.03    | -0.14    | 0.50     | 1.16     | 0.85     | 2.01     | 1.12     | 1.93     | 1.67     | 2.25     | 0.53     | 0.48     | 1.73     | 1.80     | 1.28     | 1.62     | 0.94     | 0.06     |
| -0.33    | -0.11    | 0.57     | 1.25     | 0.70     | 0.78     | 0.67     | 0.77     | 0.60     | -0.06    | 0.88     | 0.19     | 0.72     | -0.24    | 0.23     | -0.12    | 1.05     | 1.99     | 1.60     | 0.90     | 1.05     | 0.29     | 0.87     | 0.55     | 2.19     | 0.61     | 1.14     | 1.16     |
| 0.74     | 0.49     | -0.80    | -1.09    | 0.11     | -0.04    | -0.66    | 0.39     | 0.83     | 0.04     | 0.73     | 0.47     | -0.23    | 0.40     | 1.82     | 1.04     | -1.67    | 0.69     | -0.37    | -0.05    | 1.26     | 0.50     | 0.21     | 0.41     | -1.20    | 0.09     | 1.10     | 0.82     |
| 1.74     | 0.37     | 0.42     | 0.55     | 0.97     | -0.03    | 1.09     | 0.61     | -0.71    | -0.53    | 0.08     | 0.34     | 0.55     | -1.33    | 0.49     | -0.35    | 0.08     | 0.83     | -0.07    | -0.11    | -1.09    | 2.12     | -0.55    | -2.63    | -0.10    | -2.64    | -0.08    | -0.63    |
| 0.88     | 0.63     | 0.97     | 1.57     | 0.15     | 0.74     | 0.50     | 0.96     | 0.59     | -1.08    | -0.35    | 0.39     | -1.21    | -0.04    | 0.76     | -0.57    | -0.35    | -0.98    | -0.01    | -1.64    | -0.94    | -1.15    | -2.57    | -5.10    | -4.47    | -3.49    | -1.96    | -3.77    |
| 0.74     | -0.03    | -0.12    | -0.50    | -0.14    | -0.54    | 0.85     | -1.14    | -0.54    | -0.59    | 0.25     | -0.29    | -0.80    | -0.99    | 1.93     | 0.41     | -0.46    | -0.69    | -0.73    | -0.95    | -1.06    | -0.76    | -1.81    | -2.68    | -1.93    | -2.13    | -1.44    | -1.44    |
| -0.53    | 0.20     | 0.15     | 0.47     | -0.23    | 0.37     | -0.04    | 2.39     | 0.41     | -0.39    | -0.71    | -0.74    | 1.23     | -0.05    | 1.17     | -1.60    | -2.23    | -1.03    | 0.75     | -0.50    | 0.05     | -0.23    | -2.14    | -0.96    | -3.86    | -1.27    | -1.25    | -1.49    |
| 0.83     | -0.21    | 0.61     | 0.56     | -0.57    | 0.10     | 0.13     | -0.16    | 0.12     | 0.76     | -0.66    | 1.27     | -0.39    | -0.09    | 1.50     | 0.21     | -2.39    | -1.52    | -1.08    | -1.72    | 0.08     | 1.04     | -2.87    | -1.19    | -2.98    | -1.56    | -1.14    | -2.45    |
| 0.15     | -1.89    | -0.17    | 0.50     | 0.68     | 0.24     | 1.33     | -0.12    | 0.18     | -0.44    | -0.56    | 0.75     | 0.03     | 1.19     | -1.17    | -1.63    | -2.08    | -1.02    | -0.70    | -1.15    | -0.94    | 1.14     | -1.86    | -2.07    | -4.38    | -0.27    | -0.78    | -0.50    |
| -0.10    | -0.19    | 0.45     | 0.64     | -0.10    | 0.95     | 0.23     | -0.24    | 0.66     | 0.09     | -0.01    | 0.52     | 0.47     | 0.05     | 1.17     | 0.57     | 0.70     | 0.06     | 1.03     | 0.90     | -0.16    | 0.97     | -0.41    | -0.32    | 0.24     | -0.20    | -1.52    | -0.28    |
| 0.11     | -0.47    | 0.12     | 0.09     | 0.15     | -0.25    | -0.18    | -0.37    | -0.86    | -0.89    | -1.02    | -0.59    | 0.08     | -0.63    | 0.03     | 0.73     | 0.75     | 1.28     | -0.28    | 0.18     | 1.01     | -0.08    | -0.03    | 0.08     | -0.85    | -0.41    | 0.57     | -0.04    |
| 0.13     | 1.85     | 1.63     | 0.04     | 0.75     | -0.55    | -0.35    | 0.86     | -0.30    | -0.31    | 0.28     | -1.03    | 0.42     | -0.90    | 1.30     | 0.33     | 0.43     | 0.18     | 3.29     | 1.61     | -0.62    | -2.15    | -0.21    | -0.20    | -0.82    | -0.75    | 0.18     | -0.07    |
| 0.49     | -0.01    | -1.55    | 0.63     | 1.55     | 0.99     | -0.62    | 1.09     | 1.24     | 0.11     | 0.29     | -1.10    | 0.10     | -0.03    | 0.46     | -0.49    | 0.44     | 1.27     | 1.11     | 1.42     | 0.52     | -0.40    | -0.03    | 0.27     | -0.50    | 1.07     | -1.48    | 0.21     |
| 0.03     | 0.31     | 0.84     | 1.02     | 0.68     | 0.26     | 0.01     | 0.41     | 0.49     | -0.15    | -0.03    | 1.33     | 0.81     | -0.53    | 1.16     | 1.05     | 0.72     | 0.06     | 1.17     | 1.10     | 0.53     | 0.06     | 0.56     | -0.34    | -0.37    | 0.64     | 0.72     | 0.44     |
| 2.87     | 0.59     | 1.46     | -0.07    | 1.92     | 1.29     | 0.01     | 2.95     | 0.99     | 0.51     | 0.78     | 0.18     | 0.57     | 1.11     | 1.99     | 0.70     | -0.08    | 2.15     | 1.48     | 2.55     | 0.44     | 1.70     | 1.49     | -0.05    | 4.63     | 1.05     | 0.41     | -0.14    |
| 0.40     | 0.01     | -0.56    | 0.72     | 0.51     | 0.34     | 0.06     | -0.28    | -0.44    | 0.00     | 0.45     | -0.20    | 0.61     | 0.67     | 0.67     | 0.53     | -0.02    | 1.52     | 0.44     | 1.52     | 0.69     | 0.88     | 0.55     | 1.31     | -0.08    | 0.78     | -0.19    | 0.97     |
| 0.67     | 0.78     | 0.64     | 0.50     | 0.26     | 0.54     | 0.95     | -0.26    | 0.36     | 0.86     | 0.69     | -0.08    | -0.11    | 0.12     | 0.66     | 0.23     | 1.30     | 1.60     | 1.10     | 0.42     | 0.32     | 0.19     | 0.63     | -0.41    | 0.21     | 0.19     | -0.14    | -0.14    |
| 0.30     | -0.46    | 0.56     | 0.67     | 1.10     | 0.08     | -1.25    | 1.01     | 0.52     | -1.52    | -0.86    | 0.20     | 0.15     | 0.02     | -0.34    | -0.77    | -0.48    | -0.39    | 1.94     | 0.89     | -0.23    | -0.10    | 0.81     | 0.83     | -0.17    | 0.84     | -0.03    | 0.40     |
| -0.30    | 0.24     | -0.32    | 0.81     | -0.17    | 1.14     | -0.07    | 0.06     | 0.77     | -1.08    | -2.79    | 0.23     | -0.56    | -1.17    | 0.01     | -1.20    | -0.76    | 1.04     | -1.04    | 1.80     | -0.02    | -0.01    | -1.62    | -1.30    | -2.88    | 0.09     | -0.84    | -0.96    |
| 0.14     | 0.10     | 0.54     | -0.07    | 0.20     | 0.42     | 0.20     | -0.12    | -0.60    | -0.05    | 0.29     | -0.59    | 0.03     | -0.53    | -0.10    | -0.04    | -0.70    | 0.05     | 0.79     | -0.36    | -0.75    | -0.32    | -1.00    | -0.68    | 1.20     | -0.06    | 0.06     | 0.87     |
| 0.03     | 0.68     | -0.22    | 0.24     | -1.10    | 0.71     | -0.23    | 2.60     | -0.06    | -0.20    | 0.87     | -0.53    | 0.02     | 2.33     | 2.27     | 1.11     | 0.11     | 1.47     | 2.35     | -0.65    | 1.21     | 1.04     | 0.28     | 3.71     | -0.23    | 0.46     | -1.63    | 1.81     |
| 0.81     | 1.69     | 1.12     | 0.30     | 0.42     | 0.73     | -0.14    | 0.87     | 0.53     | -0.45    | 0.02     | -0.39    | 0.64     | -0.51    | -0.35    | 0.17     | 2.15     | 1.13     | 1.31     | 0.29     | 0.42     | 1.14     | 0.32     | 1.35     | -0.17    | -0.35    | -0.16    | 0.03     |
| -0.02    | -0.51    | 0.45     | 0.25     | 1.00     | 0.44     | 0.23     | 0.77     | -0.10    | 0.10     | -0.40    | 0.25     | -0.80    | -0.54    | 0.27     | 0.63     | 1.66     | 0.53     | 1.18     | 0.72     | 0.27     | 0.12     | 0.10     | -0.10    | 1.30     | 1.36     | 0.21     | 0.13     |
| -1.37    | 0.21     | 0.08     | -0.70    | 0.46     | 0.95     | -1.09    | -0.07    | 2.04     | 0.37     | 0.31     | -0.05    | 0.15     | 0.56     | -0.43    | -1.00    | 1.20     | -0.87    | 0.48     | 1.62     | 0.34     | 0.31     | 0.05     | 0.87     | -3.50    |          |          |          |



|       |       |       |       |       |       |       |       |       |       |       |       |       |       |       |       |       |       |       |       |       |       |       |        |        |       |       |       |      |
|-------|-------|-------|-------|-------|-------|-------|-------|-------|-------|-------|-------|-------|-------|-------|-------|-------|-------|-------|-------|-------|-------|-------|--------|--------|-------|-------|-------|------|
| 1.28  | -0.48 | 0.64  | 0.54  | 0.92  | -0.24 | -0.04 | 0.23  | -0.63 | -0.17 | -0.41 | 0.94  | 0.36  | -0.91 | 0.50  | -0.02 | 0.27  | -0.21 | 0.14  | 1.19  | -0.67 | 0.09  | 0.00  | -0.04  | -0.20  | -0.25 | -0.01 | 0.70  |      |
| 0.12  | 0.71  | 0.17  | 0.53  | 0.21  | 0.50  | -0.16 | 0.30  | 1.03  | 1.12  | 0.08  | 0.32  | 0.63  | -0.01 | 0.30  | -0.56 | 1.15  | 0.42  | 0.61  | 1.11  | -0.28 | 0.24  | 0.03  | -0.72  | -0.20  | 0.53  | 0.25  | 0.18  |      |
| 0.87  | 0.24  | 0.63  | 0.00  | 2.41  | 1.19  | 1.00  | -0.18 | 0.93  | 0.04  | -0.45 | 0.60  | 1.73  | 0.84  | 0.55  | 0.25  | 1.84  | -0.03 | 0.26  | 0.97  | 0.46  | 0.19  | 0.00  | 0.41   | -0.24  | 0.76  | 0.81  | 0.14  |      |
| -0.10 | 0.98  | -0.59 | 0.43  | 0.53  | -1.65 | -0.31 | 0.57  | -0.49 | 1.50  | 0.97  | -0.32 | -0.03 | 1.66  | 0.66  | -0.08 | 1.35  | 0.44  | 0.85  | 1.59  | 0.14  | -1.32 | 1.69  | 0.82   | 0.96   | 0.61  | 0.39  | -0.89 |      |
| 0.42  | 0.45  | 0.66  | 1.20  | -0.21 | -0.48 | -0.96 | 0.71  | -0.04 | -0.12 | 0.90  | 0.44  | -0.60 | -0.05 | 0.48  | 0.74  | 0.96  | 0.94  | -0.14 | 0.42  | 0.04  | 1.14  | 0.06  | 0.30   | 1.54   | 0.88  | 0.30  | 0.27  |      |
| 1.12  | 1.64  | -0.14 | 0.86  | -0.49 | 0.90  | 0.39  | 0.85  | -0.24 | 1.47  | 0.41  | 1.15  | 0.48  | 0.85  | 0.12  | 1.91  | 1.47  | 0.14  | 1.68  | 0.54  | 1.41  | 0.01  | 0.58  | 0.94   | 1.96   | 0.91  | -0.14 | 1.32  |      |
| 0.95  | 2.07  | 0.56  | 0.71  | 0.90  | -0.09 | -0.08 | -0.10 | 0.39  | 0.63  | 0.48  | 0.23  | 0.59  | 0.99  | 0.30  | -0.43 | -0.39 | -0.24 | 0.84  | 0.67  | -0.37 | 0.01  | -1.14 | -0.05  | -0.02  | -1.09 | -0.60 | 0.32  |      |
| 0.23  | 0.45  | 0.28  | 0.76  | 0.66  | -0.04 | -0.66 | 2.16  | -0.61 | 0.06  | 1.58  | -0.76 | -0.32 | 0.24  | 1.01  | -0.61 | 0.75  | 0.38  | -0.23 | 0.66  | -1.02 | 1.03  | -1.26 | 0.30   | -0.34  | 0.13  | 0.03  | 0.08  |      |
| -0.06 | -0.33 | 0.26  | 1.86  | 1.27  | 0.81  | -0.86 | -0.71 | 0.47  | 0.38  | -2.26 | -0.63 | 1.25  | -0.64 | 1.43  | 0.03  | -3.03 | 0.04  | -0.71 | -1.50 | -1.37 | -2.03 | -3.82 | -3.87  | -3.85  | -1.56 | 0.66  | -0.70 |      |
| 0.21  | 1.18  | 0.00  | 0.29  | -0.96 | -1.28 | 0.63  | 2.33  | -0.31 | 0.07  | -0.47 | -0.72 | 0.87  | 0.43  | 0.39  | -0.81 | 2.14  | 0.27  | -0.34 | -0.12 | -1.21 | -0.65 | 1.03  | -0.85  | -0.66  | 0.21  | 0.01  | -1.41 |      |
| 0.70  | 1.07  | 0.08  | 1.33  | 0.06  | 1.10  | 1.87  | 0.86  | 1.32  | 1.49  | 0.46  | 1.37  | 1.34  | 1.66  | 1.18  | 2.27  | 1.18  | 1.80  | 1.37  | 1.07  | 0.57  | 0.66  | 1.45  | 1.04   | 1.77   | 1.88  | 2.52  | 1.02  |      |
| 0.18  | 2.23  | 1.13  | 1.24  | 0.81  | 1.45  | -0.63 | 4.38  | 1.67  | 0.57  | 1.32  | 0.29  | 2.52  | 0.78  | 0.71  | 1.57  | 2.66  | 2.22  | 1.32  | 1.23  | 1.74  | 1.55  | 3.09  | 2.69   | -0.20  | 1.75  | 1.41  | 2.02  |      |
| -0.28 | -0.56 | 1.96  | 1.98  | 1.00  | -1.87 | -0.15 | 6.30  | 1.67  | 1.51  | 1.10  | -0.79 | -0.34 | 2.23  | 0.29  | -0.14 | -0.24 | -0.45 | 1.72  | 1.48  | 0.90  | -0.05 | 1.32  | 2.36   | -2.26  | 0.50  | 3.18  | 1.26  | 2.48 |
| -2.22 | -3.03 | 0.81  | 2.33  | -0.15 | -0.74 | -0.61 | 3.09  | 0.93  | 0.45  | -0.92 | -0.24 | 1.75  | -3.72 | -0.34 | 0.05  | -7.72 | 0.96  | 1.91  | -2.57 | -2.05 | 2.22  | -0.36 | -12.67 | -13.93 | -1.59 | -5.30 | 3.49  |      |
| -1.87 | -2.29 | -0.14 | -0.62 | 0.37  | 1.66  | 0.58  | 1.20  | -1.59 | 1.15  | 0.21  | -2.90 | -0.18 | -2.37 | 1.28  | -0.78 | -4.88 | 0.21  | 4.11  | -1.55 | 0.08  | -0.52 | -2.10 | -9.18  | -8.14  | 1.19  | -2.17 | 3.18  |      |
| 2.96  | 1.46  | 0.91  | 2.56  | 0.26  | -0.51 | 0.27  | 2.52  | -1.43 | -2.16 | -0.51 | 1.97  | -0.04 | -0.88 | 2.78  | -2.80 | -6.33 | -3.23 | -2.40 | -5.85 | -7.90 | 0.71  | -4.87 | -1.21  | 3.77   | -4.48 | -5.08 | -7.73 |      |
| -1.00 | -2.57 | -0.61 | -0.43 | -1.35 | -1.50 | -0.30 | 0.95  | -4.14 | -3.80 | -4.31 | -1.98 | -2.96 | -2.31 | -0.34 | -4.26 | -2.68 | -4.63 | -5.09 | -3.93 | -8.17 | -1.04 | -5.63 | 3.73   | 4.28   | -5.17 | -6.31 | -6.01 |      |
| -0.93 | 0.46  | -0.57 | -0.12 | -1.15 | -0.68 | -1.20 | -0.27 | -0.19 | -0.10 | -0.92 | -1.59 | -1.46 | -0.74 | -1.70 | 0.46  | -0.25 | 0.28  | -1.83 | -0.24 | 0.03  | 0.00  | 0.42  | 0.59   | 0.20   | 0.83  | 0.23  | -0.74 |      |
| 2.82  | 2.41  | 1.20  | 1.94  | 0.81  | 1.23  | 0.67  | 2.02  | 1.51  | 1.01  | 1.10  | 1.01  | 1.25  | 1.27  | 1.67  | 0.88  | 2.23  | 1.64  | 1.61  | 1.91  | -1.43 | 0.25  | 0.60  | 0.12   | -0.39  | 2.23  | 1.34  | 0.16  |      |
| -0.83 | -0.31 | -0.66 | -0.30 | -0.81 | -1.60 | -1.29 | -0.60 | -0.31 | -1.84 | -0.85 | -0.22 | -0.29 | -0.37 | -1.07 | 0.26  | -0.52 | -0.14 | -0.13 | -0.84 | -0.13 | -0.14 | -1.62 | -1.40  | -0.30  | -0.99 | -0.52 | -0.45 |      |
| 1.23  | 1.87  | 1.51  | 2.10  | 0.93  | 1.26  | 1.14  | 1.90  | 1.14  | 1.92  | 1.30  | 1.16  | 0.72  | 1.90  | 1.38  | 1.10  | 1.42  | 0.73  | 0.36  | 3.70  | 1.66  | 1.47  | 1.43  | 0.70   | 1.78   | -0.42 | 0.88  | 0.21  |      |
| -1.88 | -1.52 | -1.24 | -1.14 | -0.46 | -0.58 | -1.06 | -0.34 | -1.88 | -1.23 | 0.13  | -3.14 | -0.63 | -0.78 | -2.52 | -1.19 | -1.77 | -1.32 | -0.69 | -0.95 | -1.44 | -2.38 | -1.29 | -2.11  | -0.56  | -0.47 | -2.25 | -2.06 |      |
| -1.44 | -0.79 | -0.78 | -1.51 | -1.70 | -0.44 | -0.27 | -0.57 | -0.44 | 0.15  | -0.27 | -0.76 | -0.37 | -0.91 | -0.61 | 0.39  | 0.26  | -0.10 | -0.32 | -1.11 | -1.21 | -1.05 | -0.90 | -1.51  | 0.38   | -0.61 | -1.10 | -0.51 |      |
| 0.20  | 1.04  | 0.23  | -1.51 | -1.20 | -1.54 | -0.23 | 0.55  | -0.35 | 0.70  | 0.32  | -0.79 | -2.37 | 0.63  | -0.66 | 0.59  | -0.76 | 0.30  | -0.88 | -0.27 | -0.66 | -0.78 | -0.10 | -1.10  | 0.30   | 0.21  | 0.50  | -1.83 |      |
| 1.64  | 1.37  | 2.16  | 0.34  | 3.04  | 1.16  | 0.82  | 0.40  | 0.69  | 2.29  | 0.96  | 1.33  | 0.83  | 1.37  | 2.31  | 2.36  | 2.07  | 1.99  | 1.62  | 1.97  | 1.28  | 1.01  | 1.89  | 1.53   | 1.56   | 2.38  | 2.19  | -0.14 |      |
| 0.43  | 0.79  | 0.06  | 1.78  | 1.21  | 1.11  | 0.86  | 1.62  | 0.90  | -0.30 | 1.54  | 0.07  | 0.90  | 1.30  | 0.50  | 0.86  | 3.49  | 2.06  | 1.99  | 1.59  | 1.30  | 0.53  | 1.70  | 2.21   | 2.45   | 1.14  | 1.43  | 1.85  |      |
| 1.02  | 1.30  | 0.62  | 0.48  | 0.26  | 0.27  | -1.31 | 0.41  | 0.94  | 0.65  | 0.52  | 0.72  | -0.39 | 0.17  | 1.41  | 0.26  | 0.58  | 1.16  | -0.29 | -0.14 | 0.58  | -0.30 | 0.04  | -1.28  | -2.02  | -0.54 | 0.83  | 0.29  |      |
| 1.46  | 1.66  | 1.60  | 1.38  | 2.03  | -0.12 | 1.78  | 1.44  | 1.56  | 0.89  | 0.66  | 2.53  | 1.32  | -0.22 | 1.74  | -0.63 | -0.46 | 0.48  | 0.18  | -0.32 | -1.66 | 2.04  | -0.31 | -3.45  | -1.31  | -1.59 | -0.06 | 0.13  |      |
| 0.84  | 0.83  | 1.80  | 2.95  | 0.61  | 1.72  | 2.30  | 1.66  | 1.12  | -1.31 | 1.28  | 1.80  | 0.37  | -1.01 | 1.92  | -0.02 | -1.82 | -1.95 | -1.12 | -1.91 | -1.61 | 2.60  | -2.93 | -8.27  | -5.81  | -4.74 | -1.33 | -4.10 |      |
| -0.99 | 0.09  | -0.71 | -1.14 | -0.27 | 0.33  | -0.56 | -0.40 | -0.50 | -1.68 | -1.61 | -0.44 | -0.08 | -1.85 | 0.68  | -2.34 | -1.73 | -3.15 | -2.45 | -1.13 | -2.90 | -1.35 | -2.88 | -5.58  | -3.22  | -3.98 | -1.37 | -3.92 |      |
| 0.79  | 0.33  | 0.37  | 0.90  | -0.81 | 0.33  | 0.25  | 2.25  | -0.32 | -0.46 | 0.69  | -0.10 | 1.54  | 1.07  | 2.42  | -1.50 | -5.17 | -2.08 | 0.19  | -2.30 | -0.25 | 0.28  | -3.44 | -2.63  | -6.21  | -2.10 | -1.26 | -3.76 |      |
| 1.19  | -0.27 | -0.05 | -0.13 | -0.93 | 0.08  | 0.10  | -0.33 | -0.13 | 0.64  | 0.71  | 0.72  | -0.26 | -0.50 | 2.45  | -1.24 | -5.06 | -2.99 | 2.03  | -3.59 | 0.16  | 0.49  | -4.83 | -3.21  | -6.50  | -2.83 | -1.78 | -4.70 |      |
| 0.72  | -2.17 | -0.43 | 3.17  | -0.59 | -0.34 | 1.31  | -0.39 | -1.32 | -0.53 | 0.37  | 1.14  | 1.34  | -0.12 | 0.73  | -1.41 | -4.98 | -2.31 | 0.59  | -2.37 | -0.80 | -0.19 | -5.07 | -4.71  | -3.87  | -2.04 | -1.12 | -3.19 |      |
| -0.27 | 1.59  | 0.88  | 0.36  | 0.28  | 0.23  | 0.53  | 0.01  | 0.12  | 0.11  | 0.44  | 1.10  | 0.79  | 1.47  | 1.82  | 1.20  | 0.70  | 1.31  | 1.13  | 1.51  | -0.72 | 0.79  | -0.40 | 0.98   | 1.14   | 0.12  | -0.49 | 0.19  |      |
| 0.53  | -0.63 | -0.01 | 1.43  | -0.28 | -1.18 | -0.55 | 0.11  | -0.28 | 0.28  | 0.04  | -0.70 | 0.15  | 0.30  | 0.16  | 0.26  | 0.92  | -0.21 | -1.03 | 0.33  | 0.54  | 0.15  | 0.04  | -1.12  | -0.26  | 0.04  | 0.89  | -0.29 |      |
| 0.43  | 1.82  | 2.21  | 0.67  | 1.23  | -0.17 | 0.97  | 0.72  | -0.33 | -0.02 | -1.15 | 0.10  | 2.39  | -1.70 | 1.69  | 1.19  | 0.00  | 0.94  | 2.27  | 0.70  | 0.12  | 0.30  | 0.00  | 0.50   | -0.10  | -0.47 | 0.97  | -0.49 |      |
| 1.31  | 0.26  | -1.11 | 0.78  | 1.08  | -0.79 | -0.61 | 0.57  | 0.89  | 0.40  | 0.26  | -0.64 | 0.56  | 1.74  | 1.16  | 0.60  | 1.04  | 0.07  | 1.30  | 1.18  | -0.69 | 0.58  | 1.70  | 0.50   | -0.24  | 0.82  | 0.25  | 0.58  |      |
| 0.95  | 0.32  | 1.21  | 1.05  | 0.83  | 0.81  | 0.29  | 0.38  | 0.66  | 0.24  | 1.21  | 0.45  | 1.07  | 0.41  | 1.44  | 2.25  | 1.43  | 0.15  | 1.06  | 1.05  | 1.45  | 3.00  | 1.03  | 0.09   | 0.42   | 0.42  | 0.60  | 0.35  |      |
| 3.72  | 1.99  | 1.25  | 2.00  | 3.05  | 1.96  | 0.92  | 2.03  | 0.92  | 1.50  | 1.18  | 1.26  | 1.26  | 1.80  | 3.69  | 3.75  | -0.09 | 3.54  | 0.49  | 4.10  | 2.25  | 1.39  | 0.92  | 1.05   | 1.30   | 0.74  | 0.47  | 0.39  |      |
| 0.69  | 0.74  | -0.81 | 1.58  | 1.03  | 0.25  | 0.14  | 0.84  | 0.22  | 1.89  | 0.60  | -0.30 | 0.33  | 1.50  | 1.74  | 0.72  | 0.93  | 1.58  | 0.73  | 1.68  | 1.12  | 1.03  | 0.62  | 1.69   | 1.21   | 0.41  | 0.54  | 0.94  |      |
| 0.87  | 1.36  | 1.26  | 1.31  | 0.71  | 0.56  | 0.79  | 0.06  | 0.69  | 0.84  | 1.24  | 0.53  | 0.32  | 0.99  | 0.85  | 0.63  | 2.05  | 1.38  | 1.73  | 0.86  | 0.70  | 0.81  | 1.14  | 0.01   | 1.17   | 1.85  | 0.73  | 1.07  |      |
| 0.87  | 0.38  | 1.32  | 1.40  | 1.25  | 0.00  | -0.81 | 0.64  | -0.40 | -0.12 | -0.58 | -1.54 | 0.46  | 0.90  | 1.02  | 0.19  | 0.68  | -0.07 | 2.06  | 0.28  | -0.48 | 0.66  | 1.06  | 0.92   | 1.31   | 1.67  | -0.12 | 1.08  |      |
| -0.04 | -0.77 | 0.16  | 0.03  | 0.15  | 0.38  | -0.01 | 0.11  | 0.33  | -0.66 | -1.97 | 0.92  | 0.29  | -0.03 | 0.66  | -0.40 | -1.34 | 0.66  | 0.47  | -0.18 | -0.82 | 0.17  | -0.55 | -0.38  | -3.11  | 0.52  | -0.05 | -0.98 |      |
| -0.02 | 1.00  | 0.56  | 0.32  | 1.28  | 0.32  | -0.34 | 0.95  | 0.22  | -0.24 | 1.08  | -0.73 | 0.04  | 0.52  | 0.38  | -0.13 | -0.31 | 0.45  | 0.55  | 0.43  | -0.56 | 0.57  | 0.20  | 1.37   | 1.28   | 0.38  | 0.21  | 0.52  |      |
| -0.04 | 1.05  | 0.69  | 0.58  | 0.06  | 0.41  | -1.48 | 1.78  | 0.86  | 1.36  | 0.41  | 0.71  | 1.98  | 1.13  | 2.04  | 2.85  | 0.71  | 1.59  | 0.83  | -0.90 | 1.75  | 0.37  | 1.74  | 5.44   | 0.62   | 1.20  | -1.15 | 1.90  |      |
| 1.28  | 2.33  | 1.51  | 0.08  | 0.72  | 0.65  | -0.38 | 0.36  | 0.95  | 0.50  | 0.02  | 0.11  | 0.48  | 0.37  | 0.75  | 0.54  | 2.86  | 2.10  | 1.31  | 2.17  | 0.14  | 1.13  | -0.34 | 0.96   | 1.43   | 0.12  | -0.03 | 1.16  |      |
| 0.77  | 0.32  | -0.21 | -0.23 | 0.80  | 0.42  | 0.75  | 1.57  | -0.18 | 0.46  | 1.34  | 0.27  | 0.16  | 0.51  | 0.34  | 0.55  | 2.31  | 1.32  | 1.03  | 1.34  | 0.40  | -0.28 | 1.40  | 0.95   | 1.89   | 2.07  | 1.37  | 0.72  |      |
| -0.71 | 0.83  | 0.79  | -1.63 | 0.51  | 1.21  | -1.44 | -0.12 | 1.57  | 1.07  | -0.22 | 0.32  | 0.44  | 0.28  | 0.23  | -0.17 | 1.30  | -0.39 | -0.45 | 0.57  | -1.37 | 0.70  | 0.63  | -0.34  | -0.67  | 0.23  | 0.55  | 0.15  |      |

|       |       |       |       |       |       |       |       |       |       |       |       |       |       |       |       |       |       |       |       |       |       |       |        |        |       |       |       |
|-------|-------|-------|-------|-------|-------|-------|-------|-------|-------|-------|-------|-------|-------|-------|-------|-------|-------|-------|-------|-------|-------|-------|--------|--------|-------|-------|-------|
| 0.84  | 1.73  | 1.06  | -0.54 | 0.36  | -0.79 | -0.52 | 0.70  | -0.16 | 1.34  | 1.10  | 0.08  | 0.51  | 1.43  | 0.36  | 0.32  | 1.73  | 0.38  | 1.16  | 0.59  | -0.34 | 0.34  | 0.30  | 0.85   | 1.45   | 0.30  | 0.01  | -0.54 |
| 0.41  | 0.45  | 0.81  | 1.00  | 0.17  | -0.93 | -0.23 | 0.35  | 0.41  | -0.33 | 0.22  | -0.10 | 0.06  | -0.09 | 0.73  | 1.24  | 0.58  | 0.94  | 0.09  | 0.88  | 0.38  | 0.42  | 0.47  | -0.25  | 1.16   | 1.19  | 0.99  | 0.27  |
| 0.91  | 1.21  | 1.12  | 1.29  | -0.18 | 1.11  | 0.51  | -0.32 | 0.17  | 2.15  | 0.31  | 0.11  | 0.05  | 1.08  | 0.76  | 0.68  | 1.94  | 0.47  | 1.24  | 1.03  | 1.75  | 0.53  | 0.46  | 1.66   | 1.52   | 1.05  | 0.40  | 0.35  |
| 1.28  | 3.10  | 1.61  | -0.37 | 0.80  | 0.41  | 0.17  | 0.44  | 0.70  | -0.40 | 0.18  | -0.18 | -0.09 | 0.40  | 0.62  | -0.92 | -1.24 | 0.61  | 1.02  | 1.50  | -1.03 | 1.00  | -0.77 | 1.86   | -0.68  | -0.49 | -1.29 | 1.51  |
| 0.86  | 0.92  | 0.94  | 1.81  | 1.13  | 0.38  | -0.30 | 2.57  | 0.01  | 0.29  | 2.12  | 0.82  | -0.03 | 0.04  | 0.75  | -0.06 | 1.64  | 1.13  | -0.17 | -0.13 | -0.76 | 0.88  | -1.24 | -0.81  | -1.63  | 1.54  | 0.31  | 0.08  |
| 0.35  | 0.48  | 3.16  | 2.19  | 0.69  | 0.02  | 0.16  | -0.08 | 0.52  | 0.06  | -1.22 | -0.29 | 1.20  | 1.43  | 0.51  | -0.17 | -3.96 | -1.06 | 0.51  | 0.52  | -0.05 | -0.82 | -3.70 | -7.48  | -5.07  | -2.01 | -2.49 |       |
| 0.09  | 2.21  | 0.93  | 0.67  | -0.15 | -1.94 | 0.64  | 2.73  | -0.02 | 1.19  | 0.12  | 0.28  | 0.59  | 0.67  | 0.49  | -0.52 | 1.54  | 0.34  | -0.18 | 0.52  | -2.44 | -1.23 | -0.72 | -0.57  | -0.86  | 0.48  | -0.21 | -1.50 |
| 1.71  | 1.87  | 0.89  | 2.10  | 0.18  | 1.44  | 0.18  | 2.51  | 1.21  | 0.84  | 1.18  | 0.55  | 2.18  | 1.58  | 1.70  | 1.38  | 2.62  | 1.45  | 1.70  | 1.17  | 1.12  | 0.82  | 0.85  | 2.31   | 0.80   | 1.93  | 3.40  | 1.15  |
| 1.23  | 3.09  | 2.10  | -0.22 | -0.04 | 1.88  | 0.94  | 3.75  | 2.37  | 1.35  | 2.55  | 1.10  | 2.31  | 1.15  | 1.05  | 3.10  | 2.96  | 2.13  | 2.74  | 1.73  | 2.47  | 1.77  | 3.06  | 3.83   | 1.86   | 3.99  | 1.06  | 2.41  |
| -0.08 | 1.38  | 3.49  | 2.94  | 1.72  | -1.74 | 1.14  | 2.47  | 2.94  | 2.87  | 0.57  | 2.24  | 3.71  | 2.32  | -0.16 | -0.01 | 1.13  | 2.79  | 2.80  | 0.29  | 0.91  | 1.14  | 4.42  | 1.18   | 0.94   | 5.98  | -1.78 | 2.81  |
| -2.10 | -1.10 | 1.98  | 4.47  | 0.64  | 0.94  | 0.11  | 2.55  | 1.92  | 2.68  | 1.68  | 0.43  | 3.21  | 1.57  | -0.28 | 0.35  | -9.69 | 3.26  | 5.40  | -1.67 | -1.47 | 3.94  | 8.00  | -15.98 | -20.63 | 4.57  | -6.64 | 3.28  |
| -3.23 | -3.13 | -0.39 | -0.14 | 0.32  | 0.67  | -1.42 | 1.21  | -3.72 | -0.76 | -0.43 | -3.87 | -1.00 | -1.02 | 2.23  | -1.39 | -6.43 | 0.04  | 3.25  | -0.86 | -1.06 | 1.00  | -1.91 | -10.03 | -13.99 | 3.24  | -2.83 | 1.91  |
| 6.40  | 5.32  | 5.52  | 4.83  | 1.96  | 1.88  | 1.78  | 3.10  | 0.79  | 1.29  | 1.37  | 3.19  | 2.44  | 2.24  | 3.65  | -1.23 | -4.66 | -1.59 | -0.31 | -6.51 | -5.26 | 3.35  | -2.12 | 1.87   | 6.77   | -2.61 | -5.83 | -5.03 |
| -0.12 | -2.05 | 0.11  | 0.38  | -0.75 | -1.83 | -0.11 | -0.02 | -4.43 | -3.26 | -4.98 | -1.23 | -2.13 | -1.77 | -1.38 | -5.10 | -3.11 | -4.62 | -6.30 | -5.33 | -8.86 | -0.86 | -6.24 | 4.95   | 6.19   | -5.43 | -7.15 | -7.73 |
| -1.28 | 0.72  | -0.54 | -1.60 | -0.85 | -1.52 | -2.44 | 0.03  | 0.19  | -0.33 | -0.91 | -1.64 | -1.67 | -0.79 | -0.25 | 1.90  | -0.04 | 0.15  | -2.47 | 1.07  | -0.66 | -0.83 | -0.15 | 0.48   | 3.47   | 1.04  | 0.63  | -0.77 |
| 3.41  | 2.58  | 2.79  | 2.68  | 0.68  | 1.20  | 2.04  | 1.45  | 1.11  | 2.12  | 1.26  | 2.82  | 1.77  | 1.85  | 1.72  | 0.26  | 1.30  | 2.54  | 2.35  | 2.95  | 0.81  | 1.59  | 0.29  | 2.00   | 2.96   | 2.93  | 1.48  | 0.23  |
| -1.29 | -0.42 | -0.53 | -0.52 | -1.08 | -1.84 | -1.40 | -0.74 | -1.23 | -0.86 | -1.10 | -0.30 | -0.52 | -1.18 | -0.80 | -0.10 | 0.40  | -0.63 | 0.54  | -0.11 | -0.39 | -0.01 | -1.40 | -2.09  | -1.89  | -1.20 | -0.26 | -0.20 |
| 1.42  | 1.55  | 1.71  | 2.12  | 0.14  | 2.24  | 1.20  | 2.86  | 1.32  | 0.46  | 1.69  | 1.08  | 0.33  | 1.59  | 2.14  | 2.17  | 2.66  | 1.41  | 2.92  | 3.18  | 1.92  | 1.41  | 1.54  | 1.05   | 2.15   | -1.12 | -0.27 | -0.55 |
| -1.69 | -1.90 | 0.81  | -2.24 | -1.02 | -0.91 | -1.82 | -0.01 | -2.86 | -2.21 | -0.32 | -2.57 | -0.31 | -0.65 | -1.31 | -1.66 | -2.02 | -2.34 | -2.61 | -2.43 | -1.03 | -2.76 | -2.16 | -2.35  | -2.08  | -1.56 | -2.12 | -3.28 |
| -1.57 | -0.69 | -1.14 | -1.53 | -0.50 | -0.88 | -0.05 | -0.24 | 0.07  | 0.24  | 0.02  | -0.98 | -0.43 | -1.05 | -0.85 | 0.39  | -0.26 | -0.52 | -1.11 | -0.04 | -1.07 | -1.35 | -0.67 | -2.16  | -1.52  | -0.77 | -0.73 | -0.60 |
| 0.07  | 1.25  | 0.28  | -1.61 | -0.30 | -0.59 | -0.20 | -0.13 | -1.56 | 0.16  | 0.72  | -0.62 | 0.19  | 0.77  | 0.77  | -1.24 | -1.19 | 1.44  | 0.05  | 0.86  | -0.75 | -1.05 | -2.01 | -1.56  | -0.48  | 1.39  | -0.41 | -1.10 |
| 2.27  | 2.67  | 3.24  | 1.69  | 3.12  | 2.00  | 1.77  | 3.16  | 2.41  | 1.70  | 1.86  | 1.83  | 1.54  | 2.21  | 3.21  | 3.22  | 4.29  | 3.51  | 1.79  | 2.88  | 1.66  | 1.98  | 1.61  | 3.67   | 2.20   | 3.05  | 3.01  | 0.97  |
| 0.38  | 0.93  | 1.26  | 1.30  | 1.32  | 0.98  | 0.58  | 1.57  | 0.90  | 0.41  | 1.72  | 0.48  | 1.30  | 1.64  | 0.94  | 0.92  | 2.86  | 2.89  | 2.34  | 2.20  | 1.71  | 0.55  | 1.89  | 2.22   | 2.97   | 1.77  | 1.31  | 2.01  |
| 0.96  | 1.19  | 0.93  | 1.03  | 1.41  | -0.81 | -1.48 | 1.38  | 0.61  | 0.59  | 1.17  | 1.05  | 0.90  | 0.54  | 1.58  | 1.72  | -1.17 | 2.51  | 0.32  | -0.12 | 0.26  | -0.93 | 0.11  | -0.02  | -1.29  | 0.26  | 1.18  | -0.05 |
| 3.79  | 3.11  | 3.12  | 3.12  | 3.29  | 2.25  | 2.42  | 2.73  | 2.45  | 1.67  | 2.99  | 4.63  | 2.96  | 0.17  | 3.15  | -0.32 | 0.93  | -0.42 | 0.68  | -0.38 | 0.97  | 4.57  | -0.77 | -2.23  | -0.64  | -0.20 | 0.19  | -1.15 |
| 3.14  | 3.48  | 5.31  | 5.50  | 2.72  | 4.12  | 5.69  | 4.21  | 4.01  | 1.00  | 2.63  | 4.43  | 1.52  | -0.81 | 2.36  | 0.27  | -2.51 | -1.79 | -1.20 | -1.76 | -0.88 | 5.76  | -3.61 | -9.46  | -8.85  | -4.77 | -3.03 | -6.26 |
| -0.23 | -2.61 | -3.45 | -2.00 | -1.30 | -2.38 | -0.77 | -1.37 | -2.40 | -3.25 | -0.26 | -1.26 | -1.03 | -2.01 | -0.13 | -2.97 | -3.73 | -3.33 | -2.38 | -2.64 | -2.58 | -4.51 | -5.87 | -6.44  | -8.88  | -5.79 | -2.52 | -5.06 |
| 0.52  | -1.51 | 1.55  | 1.59  | -0.49 | 0.47  | 0.18  | 2.33  | 1.08  | 0.70  | 0.70  | 1.06  | 0.84  | 0.53  | 2.53  | -1.70 | -6.32 | -2.65 | 0.03  | -2.19 | -0.35 | 1.05  | -2.44 | -2.48  | -8.03  | -1.85 | -1.20 | -3.56 |
| 1.43  | -0.94 | 0.36  | 1.22  | -0.67 | 0.46  | 0.69  | -0.13 | -0.45 | 1.09  | -0.37 | 1.18  | 0.55  | 0.35  | 2.76  | -0.96 | -6.86 | -2.83 | -1.66 | -3.38 | -0.01 | 2.02  | -5.19 | -3.32  | -8.85  | -3.92 | -2.11 | -6.48 |
| 0.68  | -4.90 | 0.07  | 0.19  | 0.46  | 0.28  | 0.63  | -0.23 | -1.65 | -0.09 | -1.08 | -0.10 | 1.17  | 0.61  | 1.04  | -1.47 | -6.56 | -3.13 | -0.79 | -1.42 | -2.48 | 0.67  | -4.24 | -6.51  | -3.48  | -3.74 | -2.54 | -4.03 |
| 0.54  | 1.16  | 1.37  | 0.73  | 0.30  | -0.31 | -0.39 | 0.73  | 0.16  | 0.50  | 0.43  | 0.63  | 2.25  | 1.70  | 1.91  | 0.65  | 0.61  | 0.50  | 1.18  | 1.69  | 0.19  | 1.30  | -0.15 | 1.36   | 1.16   | 0.24  | 0.39  | 1.15  |
| 0.22  | -0.07 | 1.19  | 1.45  | 0.83  | -0.77 | 0.30  | 0.31  | -0.32 | -0.46 | -1.12 | -0.32 | -0.19 | 0.57  | -0.51 | 0.50  | 0.84  | 0.70  | -0.10 | -0.21 | -0.09 | 0.05  | -0.17 | 0.69   | -0.68  | -0.26 | -0.10 | 0.07  |
| 0.72  | 1.32  | 3.20  | 1.04  | 1.62  | -0.45 | 0.14  | 2.11  | -0.08 | -0.29 | 1.29  | -0.58 | 2.33  | -0.26 | 2.74  | 0.39  | 1.84  | -0.57 | 2.85  | 2.62  | 1.69  | 0.12  | 0.07  | 0.57   | -0.99  | 0.51  | 1.50  | 0.43  |
| 1.51  | 1.31  | 1.12  | 0.65  | 2.66  | -0.70 | -0.09 | 0.77  | 1.37  | 0.66  | 0.10  | -1.25 | 1.10  | -0.01 | 0.23  | 0.39  | 1.63  | 0.69  | 1.03  | 1.17  | -0.63 | 1.32  | 0.74  | -0.01  | -0.75  | 0.37  | 0.72  | 0.80  |
| 0.79  | 0.99  | 1.04  | 1.49  | 2.01  | 0.65  | 0.53  | 0.85  | 0.48  | 0.89  | 0.23  | 1.32  | 1.33  | 1.50  | 1.84  | 2.23  | 1.14  | 0.88  | 1.23  | 1.58  | 1.40  | 0.94  | 0.83  | 0.69   | 0.63   | 1.58  | 0.54  | 0.82  |
| 3.40  | 2.24  | 2.40  | 2.14  | 2.70  | 2.23  | 0.19  | 2.88  | 1.86  | 2.60  | 2.57  | 0.30  | 2.02  | 2.08  | 3.21  | 3.19  | 0.65  | 3.39  | 1.45  | 3.54  | 1.64  | 2.17  | 3.10  | 0.48   | 3.88   | 2.38  | 3.38  | 1.57  |
| 0.81  | 1.01  | 1.26  | 2.01  | 1.45  | 1.43  | 0.59  | 0.77  | 1.11  | 2.16  | 1.26  | 0.46  | 1.15  | 1.94  | 2.17  | 1.36  | 1.61  | 2.63  | 0.19  | 1.89  | 0.72  | 1.35  | -0.10 | 2.39   | 1.29   | 1.04  | 1.71  | 1.55  |
| 1.54  | 2.01  | 1.59  | 1.54  | 1.21  | 0.54  | 0.75  | 0.75  | 1.49  | 0.97  | 0.98  | 1.19  | 0.76  | 1.09  | 0.61  | 0.19  | 2.36  | 1.57  | 2.51  | 0.90  | 1.04  | 1.20  | 1.71  | 0.02   | 1.41   | 1.84  | 0.88  | 1.52  |
| 0.92  | 0.85  | 1.53  | 2.21  | 1.40  | 1.63  | 0.11  | -0.13 | 0.39  | -0.28 | -0.66 | 0.83  | 1.07  | 2.24  | 0.86  | 0.00  | 0.27  | 0.03  | 2.43  | 2.03  | 1.10  | -0.55 | 0.42  | 1.22   | 2.50   | 0.34  | 0.19  | 1.20  |
| 0.61  | -0.39 | 0.75  | 0.04  | 0.04  | 1.00  | -0.77 | 1.00  | -0.20 | -0.19 | -2.11 | 0.01  | 1.11  | 1.06  | 0.39  | -0.60 | -0.43 | 0.08  | -0.78 | -0.25 | 0.17  | 0.57  | -0.89 | -1.05  | -3.14  | 0.44  | -0.83 | -0.87 |
| 0.20  | 1.49  | 1.12  | 0.35  | 1.40  | 0.55  | 0.25  | 0.75  | 0.31  | 0.12  | 1.26  | 0.26  | 0.04  | 0.24  | -0.01 | -0.02 | 1.03  | 0.60  | 0.64  | -0.72 | -0.72 | -0.32 | 0.02  | 0.97   | 1.05   | 0.71  | -0.05 | 0.70  |
| 0.79  | 1.21  | 1.68  | 2.17  | -1.06 | 0.64  | -0.68 | 2.38  | 0.43  | 1.81  | 1.76  | 0.75  | 2.06  | 3.91  | 0.99  | 1.80  | 2.04  | 1.69  | 2.08  | 0.24  | 1.97  | 0.54  | 1.76  | 4.80   | -2.24  | 2.00  | -0.80 | 1.77  |
| 1.03  | 1.93  | 1.06  | 1.26  | 0.99  | 0.39  | -0.34 | 1.10  | 0.66  | 0.66  | 0.19  | -0.01 | 1.74  | 1.10  | 1.30  | -0.37 | 2.69  | 3.04  | 0.02  | 2.52  | -0.09 | 0.80  | -0.61 | 1.35   | 1.13   | 0.21  | -1.03 | 2.12  |
| 1.01  | 0.97  | 1.19  | 0.48  | 1.00  | 0.94  | 0.81  | 2.35  | 0.54  | 0.87  | 0.28  | 0.73  | 0.41  | 0.57  | 0.17  | 1.19  | 1.94  | 1.18  | 2.47  | 1.14  | 0.61  | 0.09  | 1.84  | 1.73   | 2.45   | 2.38  | 1.66  | 1.34  |
| -0.76 | -0.14 | 1.21  | -0.33 | 0.62  | 1.38  | 0.11  | 0.72  | 1.34  | 1.09  | -0.10 | 0.46  | 1.00  | 0.71  | -0.26 | -0.12 | 1.07  | 1.20  | 0.02  | 1.06  | -0.56 | 0.87  | -0.86 | 0.42   | 0.08   | 1.36  | 0.02  | 0.38  |
| 0.92  | 0.22  | 0.83  | 1.97  | -1.42 | 1.09  | -0.81 | -0.38 | -0.32 | 0.91  | 0.45  | 2.37  | -0.81 | -0.77 | 0.86  | -3.01 | -3.42 | -2.36 | -2.17 | -4.20 | -4.09 | 1.09  | -2.77 | -5.41  | -8.32  | -1.92 | -4.03 | -3.95 |
| 1.14  | 0.21  | 1.08  | 1.39  | 0.78  | -0.04 | 0.90  | -0.01 | 0.06  | 1.36  | -1.45 | 0.98  | -0.50 | -1.67 | 2.34  | -3.42 | -6.05 | -2.55 | -2.76 | -4.58 | -1.01 | 1.61  | -1.97 | -6.23  | -6.15  | -2.37 | -4.41 | -4.39 |
| -1.26 | -2.26 | -0.50 | 0.85  | -1.84 | 0.06  | 0.56  | -1.75 | -3.01 | -1.05 | -0.32 | -2.08 | -2.64 | -2.63 | 2.36  | -2.72 | -4.84 | -3.75 | -1.90 | -7.37 | -6.26 | -0.97 | -4.57 | -6.49  | -11.68 | -7.57 | -5.57 | -5.53 |
| 1.38  | 1     |       |       |       |       |       |       |       |       |       |       |       |       |       |       |       |       |       |       |       |       |       |        |        |       |       |       |

|       |       |       |       |       |       |       |       |       |       |       |       |       |       |       |       |       |       |       |       |       |       |       |        |        |        |       |       |   |
|-------|-------|-------|-------|-------|-------|-------|-------|-------|-------|-------|-------|-------|-------|-------|-------|-------|-------|-------|-------|-------|-------|-------|--------|--------|--------|-------|-------|---|
| 2.55  | 2.85  | 2.30  | 0.74  | 1.35  | 0.04  | 0.18  | 0.79  | -0.45 | -0.22 | -0.29 | -0.25 | 0.27  | 0.60  | -0.01 | -0.15 | 0.05  | -0.54 | 0.90  | 1.10  | -0.42 | -0.14 | -1.23 | 0.39   | -1.39  | -1.00  | 0.22  | -0.19 |   |
| 0.74  | 1.76  | 1.31  | 1.64  | 1.02  | 0.83  | -0.20 | 2.39  | 0.23  | 0.37  | 1.09  | 0.05  | 0.01  | 0.62  | 1.43  | 0.23  | 1.28  | 1.91  | 0.21  | 0.19  | -0.88 | 0.96  | -0.43 | 0.32   | -0.86  | 1.00   | 0.83  | 0.31  |   |
| 1.38  | 0.05  | 3.48  | 1.67  | 2.50  | -0.03 | -0.36 | 0.71  | 1.90  | -0.28 | 2.08  | -0.25 | 2.30  | 1.18  | 1.19  | -1.22 | -3.24 | -0.39 | -0.18 | 0.55  | 0.43  | -0.39 | -4.63 | -6.69  | -5.99  | -4.17  | -2.51 | -2.87 |   |
| 0.34  | 2.60  | 1.04  | 0.70  | -0.42 | -0.75 | 0.55  | 3.29  | -0.78 | -0.20 | 0.01  | -0.17 | 0.39  | 0.78  | 1.48  | 1.18  | 2.56  | 0.80  | -0.03 | -0.79 | -1.59 | -1.25 | -0.78 | -0.92  | -2.38  | 0.57   | 0.91  | -0.12 |   |
| 1.61  | 1.72  | 1.41  | 2.08  | 0.94  | 1.26  | 0.77  | 2.52  | 0.81  | 0.66  | 1.05  | 0.35  | 2.43  | 1.23  | 1.88  | 1.50  | 3.17  | 1.11  | 2.45  | 2.06  | 1.94  | 0.95  | 1.35  | 2.67   | 2.38   | 1.36   | 3.37  | 0.98  |   |
| 1.77  | 3.28  | 2.71  | 1.67  | 1.57  | 2.76  | 0.89  | 3.99  | 2.91  | 2.18  | 4.48  | 0.97  | 4.39  | 1.73  | 0.23  | 3.17  | 3.34  | 3.01  | 2.90  | 1.94  | 0.69  | 2.53  | 1.52  | 3.05   | 3.33   | 3.68   | 1.46  | 3.03  |   |
| 2.79  | 2.92  | 5.48  | 4.88  | 2.95  | -0.55 | 1.48  | 3.06  | 5.06  | 3.10  | 2.28  | 3.93  | 5.02  | 2.38  | 1.53  | 2.81  | 3.05  | 4.94  | 1.87  | 0.64  | 1.21  | 3.52  | 4.37  | 4.75   | 3.36   | 7.61   | -1.29 | 4.48  |   |
| 1.75  | 1.48  | 5.28  | 5.88  | 2.28  | 2.58  | 1.15  | 3.33  | 5.06  | 4.47  | 3.08  | 3.12  | 5.41  | -0.10 | 0.55  | 3.19  | -9.18 | 6.88  | 4.01  | -1.35 | 0.95  | 5.59  | 4.21  | -16.32 | -19.89 | 5.57   | -4.91 | 4.23  |   |
| -0.77 | -5.43 | -2.44 | -0.72 | 0.62  | 3.56  | -3.06 | 0.45  | -4.72 | -3.44 | -0.91 | -6.30 | -1.11 | -2.27 | 1.41  | -3.14 | -8.59 | -0.28 | 0.70  | -0.94 | -3.36 | 0.03  | -2.74 | -13.55 | -14.25 | -0.57  | -3.79 | 2.06  |   |
| 9.20  | 11.31 | 8.07  | 7.60  | 5.15  | 3.90  | 3.13  | 7.54  | 6.38  | 7.32  | 4.12  | 6.27  | 5.14  | 3.72  | 6.72  | 4.28  | 3.31  | 3.74  | 2.72  | -4.50 | 0.35  | 4.62  | 0.08  | 5.81   | 10.34  | 2.08   | -1.86 | 0.02  |   |
| 0.77  | -1.59 | 0.68  | -0.11 | 0.29  | -1.77 | -0.71 | 0.27  | -3.88 | -2.63 | -3.76 | -1.45 | -2.10 | -2.03 | -1.00 | -4.05 | -2.46 | -4.85 | -6.51 | -4.92 | -9.06 | -1.14 | -5.63 | 6.70   | 9.71   | -5.44  | -6.54 | -7.52 |   |
| -0.88 | 0.33  | -1.69 | -1.56 | 0.52  | -1.39 | -2.76 | 0.79  | 0.22  | -0.44 | -1.55 | -1.80 | -1.04 | -0.43 | -0.75 | -0.09 | 0.75  | 0.82  | -2.55 | 0.72  | -0.33 | -1.30 | -0.34 | 0.32   | 2.31   | 1.14   | 0.39  | -0.44 |   |
| 4.72  | 2.77  | 2.90  | 3.72  | 3.12  | 1.71  | 2.31  | 1.59  | 0.99  | 1.20  | 1.32  | 1.53  | 0.82  | 2.98  | 1.89  | 2.16  | 2.65  | 2.86  | 2.52  | 3.79  | 0.28  | 1.39  | 0.32  | 0.21   | 2.62   | 2.24   | 0.59  | 0.59  |   |
| -1.40 | -0.03 | -0.70 | -0.27 | -0.09 | -1.65 | -1.18 | -0.32 | -0.62 | -0.94 | -0.86 | -0.10 | -0.58 | -0.83 | 0.07  | 0.12  | -1.00 | -0.35 | -0.40 | -0.81 | -0.36 | -0.22 | -1.82 | -2.14  | -1.30  | -1.28  | -0.40 | -0.46 |   |
| 1.94  | 1.89  | 2.35  | 1.87  | 1.84  | 3.55  | 0.06  | 2.86  | 1.10  | 0.42  | 1.33  | 0.46  | 0.25  | 1.94  | 1.14  | 2.32  | 3.31  | 2.19  | 2.54  | 3.56  | 2.63  | 2.15  | 1.99  | 1.38   | 0.48   | -0.61  | 1.24  | 0.81  |   |
| -0.43 | -2.07 | -1.66 | -2.16 | -0.41 | -0.64 | -1.45 | 0.49  | -3.02 | -2.09 | -0.98 | -2.70 | -0.59 | -1.36 | -1.37 | -3.03 | -1.55 | -2.12 | -3.72 | -1.43 | -1.26 | -2.47 | -2.91 | -2.25  | -2.60  | -1.44  | -2.79 | -3.18 |   |
| -1.34 | -0.63 | -0.14 | -1.84 | -0.59 | -0.26 | -0.51 | -0.54 | -0.48 | -0.37 | -0.66 | -0.40 | -0.41 | -0.97 | -0.81 | -0.72 | -0.20 | -0.28 | -0.50 | -0.94 | -1.09 | -0.71 | -0.86 | -1.88  | 0.48   | -0.72  | -0.79 | -0.48 |   |
| 1.59  | 1.16  | 0.58  | 0.03  | -0.52 | 0.40  | 1.60  | 0.67  | -0.21 | 0.14  | 0.86  | -1.36 | -0.73 | 1.33  | 1.06  | -0.12 | -0.41 | 0.07  | -1.78 | -0.12 | -0.39 | -1.10 | -1.08 | -0.13  | 0.59   | 2.08   | 0.71  | -2.81 |   |
| 2.02  | 2.79  | 3.81  | 2.45  | 3.44  | 1.23  | 1.65  | 1.56  | 2.45  | 2.34  | 1.86  | 2.11  | 1.29  | 3.46  | 4.24  | 3.32  | 3.84  | 4.13  | 1.61  | 3.12  | 1.74  | 0.74  | 2.10  | 3.26   | -1.81  | 3.20   | 2.87  | 0.69  |   |
| 0.61  | 1.03  | 1.11  | 1.23  | 1.49  | 1.08  | 0.21  | 1.57  | 1.09  | -0.34 | 0.82  | 0.14  | 1.51  | 1.36  | 1.44  | 1.32  | 3.15  | 3.66  | 2.24  | 2.84  | 1.97  | 1.04  | 1.71  | 2.74   | 4.93   | 1.85   | 2.63  | 2.02  |   |
| 1.54  | 1.47  | 0.63  | 0.30  | 1.01  | 0.80  | 1.08  | 1.73  | 0.79  | 0.94  | 1.48  | 0.75  | 0.81  | 1.34  | 2.06  | 0.26  | -0.21 | 2.79  | -0.11 | -0.23 | 1.07  | 0.48  | 0.51  | 0.24   | -1.34  | 1.10   | 1.39  | -0.06 |   |
| 6.30  | 5.33  | 6.15  | 5.47  | 4.43  | 3.92  | 5.41  | 3.92  | 4.53  | 2.13  | 4.14  | 6.14  | 4.36  | 0.19  | 4.89  | 0.97  | 1.76  | 1.02  | 1.43  | 1.25  | 0.54  | 7.90  | 0.06  | -0.29  | -0.08  | -0.30  | 0.76  | 0.70  |   |
| 6.16  | 5.95  | 6.63  | 8.36  | 5.43  | 7.51  | 10.07 | 6.90  | 7.97  | 3.20  | 6.25  | 8.34  | 4.11  | 0.57  | 6.43  | 2.57  | -0.17 | -0.32 | 0.21  | -1.95 | 1.94  | 9.74  | -3.03 | -9.18  | -7.55  | -2.76  | -1.96 | -4.79 |   |
| -2.12 | -2.68 | -2.63 | -4.12 | -2.13 | -3.90 | -1.37 | -2.61 | -4.20 | -5.54 | -3.61 | -4.33 | -1.58 | -2.93 | -1.60 | -4.93 | -4.87 | -5.59 | -3.27 | -3.85 | -5.11 | -6.58 | -6.56 | -8.06  | -7.77  | -7.31  | -4.19 | -6.23 |   |
| 1.21  | -0.68 | 1.83  | 1.88  | 0.31  | 0.80  | 0.94  | 2.28  | 1.12  | 0.81  | 0.64  | 0.01  | 1.94  | 0.50  | 3.74  | -1.75 | -7.97 | -2.50 | -0.19 | -4.32 | -0.13 | 1.03  | -3.06 | -2.70  | -12.11 | -3.00  | 0.92  | -4.44 |   |
| 1.85  | -1.06 | 0.38  | 1.18  | -0.59 | 0.76  | 0.85  | -0.05 | 0.95  | 1.97  | -0.15 | 1.90  | 0.63  | 0.48  | 2.59  | -1.68 | -8.11 | -3.18 | -1.77 | -5.67 | 0.51  | 1.89  | -5.72 | -3.88  | -12.86 | -5.21  | -2.55 | -7.72 |   |
| 0.69  | -5.14 | 0.03  | 2.41  | 0.56  | 0.50  | 0.83  | -1.17 | -2.46 | -1.93 | -1.50 | -1.37 | -0.11 | 0.02  | 0.97  | -2.12 | -6.60 | -2.84 | -0.74 | -4.90 | -3.08 | 2.21  | -5.95 | -6.23  | -8.99  | -4.87  | -2.37 | -4.42 |   |
| 0.26  | 1.74  | 1.05  | 1.75  | 0.78  | 0.69  | 0.61  | 0.71  | 0.05  | 0.58  | 1.19  | 1.18  | 2.28  | 0.17  | 2.25  | 1.56  | 1.05  | 2.09  | 0.72  | 1.10  | -0.07 | 0.10  | -0.59 | 0.69   | 0.60   | 0.15   | -0.34 | 0.56  |   |
| 0.29  | -0.06 | 0.99  | 0.79  | 0.74  | -0.64 | -0.23 | 0.45  | -0.69 | -0.77 | -0.65 | -0.15 | -0.30 | 0.20  | 0.28  | 0.64  | 0.59  | 0.79  | -0.11 | 0.74  | 0.87  | 0.14  | -0.74 | -0.26  | -1.70  | 0.28   | 1.11  | 0.20  |   |
| 0.32  | 2.40  | 2.94  | 2.08  | 2.27  | -0.50 | 0.51  | 0.41  | 1.17  | -0.11 | -0.28 | -0.32 | 1.77  | 0.80  | 2.06  | 1.33  | 1.96  | 2.08  | 3.06  | 2.50  | 0.76  | -0.84 | 0.39  | 0.02   | -0.19  | 0.66   | 1.33  | 0.33  |   |
| 2.22  | 1.48  | 0.41  | 0.74  | 2.34  | -0.44 | -0.67 | 1.31  | 2.07  | 0.58  | -0.50 | -0.72 | 0.60  | 0.98  | 0.68  | -0.39 | 2.04  | 0.33  | 0.49  | 1.21  | -0.77 | 0.60  | 1.82  | 0.98   | -0.92  | 0.17   | 0.82  | -0.11 |   |
| 1.45  | 1.27  | 1.87  | 2.41  | 1.46  | 0.80  | 0.02  | 1.18  | 0.17  | 0.34  | 1.66  | 0.81  | 1.57  | 1.34  | 2.67  | 2.18  | 1.55  | 0.90  | 1.80  | 1.57  | 1.44  | 1.34  | 0.78  | 0.21   | -1.03  | 1.99   | 0.91  | 1.01  |   |
| 4.17  | 2.76  | 1.69  | 3.03  | 2.30  | 2.35  | 2.19  | 3.27  | 1.93  | 1.24  | 2.05  | 1.50  | 1.83  | 2.53  | 6.02  | 2.57  | 1.78  | 4.20  | 2.46  | 4.04  | 2.72  | 1.78  | 3.53  | 2.30   | 2.95   | 1.71   | 0.43  | 1.21  |   |
| 1.75  | 0.93  | 1.38  | 2.36  | 2.61  | 1.68  | 0.34  | 0.37  | 0.45  | 1.58  | 1.27  | 0.72  | 1.03  | 2.28  | 2.06  | 1.78  | 1.79  | 2.05  | 0.76  | 2.74  | 1.65  | 1.90  | 0.59  | 2.75   | 1.60   | 2.20   | 0.86  | 1.98  |   |
| 1.95  | 2.39  | 1.12  | 1.80  | 1.41  | 0.58  | 0.88  | 0.75  | 1.45  | 1.19  | 1.14  | 1.22  | 1.33  | 2.31  | 1.97  | 1.34  | 2.42  | 2.27  | 3.03  | 1.13  | 0.87  | 1.12  | 1.64  | 0.40   | 1.69   | 1.73   | 1.32  | 0.72  |   |
| 1.45  | 2.02  | 1.23  | 2.42  | 2.23  | 1.03  | 0.17  | 1.51  | 0.59  | 1.19  | -0.92 | -1.00 | 1.12  | 1.45  | 1.45  | -0.35 | 1.30  | 0.37  | 2.85  | 1.24  | -0.11 | 0.29  | 1.04  | 1.68   | 1.12   | 1.98   | 0.59  | 0.69  |   |
| 0.05  | 0.15  | 0.38  | 0.28  | 0.54  | 0.92  | 0.25  | 1.53  | 0.54  | -0.68 | -0.28 | 0.72  | -1.12 | 1.12  | 1.25  | -0.06 | -0.26 | 0.32  | -1.45 | 0.95  | -0.75 | 0.25  | -1.12 | -2.94  | -4.72  | -0.03  | -0.34 | -1.65 |   |
| -0.07 | 0.79  | 0.75  | 0.08  | 1.16  | 0.46  | -0.20 | 0.36  | -0.72 | -0.69 | 0.54  | -0.70 | 0.04  | -0.39 | 0.32  | 0.03  | -0.11 | 1.16  | 1.29  | -0.83 | -0.61 | 0.05  | -0.61 | -1.96  | 0.58   | 0.54   | -0.21 | 0.78  |   |
| 2.08  | 2.80  | 1.67  | 2.56  | 0.23  | 0.62  | 0.60  | 1.88  | 1.65  | 0.66  | 0.61  | 0.18  | 1.86  | 1.71  | 2.90  | 2.32  | 2.48  | 1.97  | 3.67  | 1.20  | 2.33  | 1.18  | 2.07  | 1.72   | -2.25  | 1.46   | 0.90  | 1.57  |   |
| 1.63  | 1.08  | 1.19  | 1.30  | 1.36  | 0.38  | -1.81 | 0.82  | 0.86  | -0.01 | -0.37 | -1.05 | 0.29  | 1.01  | 0.78  | 0.48  | 0.90  | 2.91  | 0.14  | 0.59  | -0.47 | -0.80 | -0.68 | 0.42   | 2.79   | -0.06  | 0.76  | 1.99  |   |
| 1.44  | 1.40  | 1.53  | 0.73  | 1.11  | 1.15  | 1.39  | 1.43  | 0.00  | 0.78  | 0.67  | 0.84  | 0.92  | 0.81  | 1.27  | 1.42  | 1.55  | 2.13  | 2.75  | 1.46  | 1.43  | 0.38  | 1.28  | 1.23   | 3.48   | 2.89   | 1.88  | 1.87  |   |
| 0.17  | -0.13 | 1.71  | -0.59 | 0.67  | 1.63  | -0.32 | 0.92  | 1.09  | -0.29 | -0.02 | 0.11  | 1.33  | 0.28  | 0.14  | -1.19 | -1.56 | -0.29 | 0.32  | 0.67  | 0.43  | 1.16  | 1.51  | 0.56   | -1.31  | 0.73   | 0.06  | -1.21 |   |
| 1.88  | -0.37 | 0.49  | 2.00  | -0.81 | 0.24  | 0.87  | 0.67  | -0.37 | 0.61  | -1.05 | 1.86  | -0.08 | -1.46 | 2.14  | -3.78 | -4.31 | -2.15 | -1.15 | -5.25 | -3.08 | 1.45  | -4.49 | -7.09  | -7.72  | -4.41  | -4.44 | -4.59 |   |
| 0.81  | 0.20  | 0.82  | 2.30  | 0.74  | 1.31  | 0.51  | 0.08  | 1.00  | 0.29  | -0.81 | 2.08  | -0.18 | -1.64 | 1.68  | -4.61 | -7.15 | -2.86 | -0.92 | -4.77 | -1.43 | 2.25  | -1.39 | -7.46  | -5.44  | -4.07  | -4.94 | -5.52 |   |
| -1.01 | -4.43 | -0.85 | -0.95 | -1.42 | 1.17  | 0.79  | -1.19 | -2.92 | -3.12 | -1.15 | -3.60 | -1.86 | -4.20 | 0.97  | -5.10 | -6.19 | -4.47 | -2.71 | -8.27 | -6.39 | -1.05 | -6.72 | -7.16  | -13.63 | -11.61 | -5.84 | -7.01 |   |
| 2.03  | 1.94  | 1.18  | 2.78  | 2.07  | 1.52  | 1.40  | 1.50  | 0.76  | 1.19  | 1.12  | 0.90  | 1.21  | 1.94  | 5.75  | 2.72  | 2.23  | 2.18  | 0.54  | 2.79  | 0.32  | 1.62  | 0.86  | 3.35   | 2.91   | 1.75   | 2.94  | 1.11  |   |
| 2.98  | 1.25  | 2.02  | 2.39  | 3.91  | 2.16  | 3.17  | 3.14  | 2.68  | 1.29  | 1.60  | 1.22  | 2.68  | 4.09  | 3.51  | 2.59  | 5.01  | 3.39  | 3.97  | 4.70  | 4.88  | 4.59  | 3.16  | 6.08   | 2.72   | 3.28   | 5.23  | 3.43  |   |
| 3.76  | 1.54  | 1.28  | 2.07  | 1.42  | 1.14  | 0.55  | 1.62  | 1.53  | 0.52  | 0.90  | 1.16  | 0.94  | 1.63  | 2.34  | 0.76  | 2.00  | 0.21  | 1.57  | 3.32  | 1.32  | 3.35  | 0.59  | -0.13  | -6.03  | -1.04  | -0.69 | 1.75  | - |

|       |       |        |        |        |       |       |       |       |       |       |        |       |       |       |        |        |        |        |        |       |       |        |        |        |        |        |        |      |
|-------|-------|--------|--------|--------|-------|-------|-------|-------|-------|-------|--------|-------|-------|-------|--------|--------|--------|--------|--------|-------|-------|--------|--------|--------|--------|--------|--------|------|
| 0.36  | 2.26  | 0.46   | 0.45   | -0.26  | -0.10 | 1.09  | 2.57  | -0.50 | 1.56  | 0.35  | 0.17   | 1.11  | 0.25  | -0.02 | -0.80  | 1.57   | 1.01   | -0.27  | 0.12   | -2.22 | -1.24 | -0.41  | -1.77  | -2.33  | -0.18  | -0.44  | -2.06  |      |
| 1.73  | 2.36  | 1.20   | 2.30   | -1.29  | 0.80  | 0.44  | 3.04  | 1.33  | 1.24  | 1.20  | 0.54   | 2.33  | 1.76  | 1.96  | 1.85   | 4.02   | 1.90   | 1.62   | 2.35   | 0.38  | 0.54  | 1.00   | 2.80   | 2.42   | 2.36   | 4.09   | 1.61   |      |
| 1.31  | 4.70  | 3.54   | 1.94   | 1.77   | 3.16  | 1.55  | 5.57  | 2.88  | 2.92  | 3.97  | 1.46   | 4.61  | 1.86  | 1.91  | 3.56   | 3.88   | 4.35   | 3.73   | 3.72   | 2.41  | 2.19  | 3.50   | 4.73   | 2.11   | 3.83   | 1.33   | 3.08   |      |
| 4.27  | 7.37  | 9.67   | 7.21   | 5.71   | 0.71  | 3.18  | 3.72  | 7.39  | 5.73  | 3.97  | 7.60   | 5.98  | 3.96  | 0.94  | 2.44   | 3.41   | 7.40   | 4.19   | 2.85   | 3.52  | 5.09  | 7.07   | 4.61   | 8.45   | -2.20  | 1.32   | 7.91   |      |
| 5.59  | 7.11  | 8.91   | 10.76  | 6.58   | 3.93  | 4.39  | 3.96  | 10.72 | 10.10 | 9.16  | 8.05   | 9.86  | 2.20  | 0.51  | 3.47   | -7.58  | 11.82  | 6.07   | -0.52  | 3.17  | 8.14  | 6.13   | -17.67 | -18.25 | -12.88 | -3.64  | 7.91   |      |
| -3.52 | -6.55 | -3.07  | -1.84  | -1.37  | 0.56  | -5.37 | -0.03 | -6.49 | -5.17 | -1.33 | -8.28  | -2.70 | 4.74  | 0.33  | -5.44  | -9.78  | -0.96  | 0.57   | -1.73  | -4.19 | -0.40 | -3.70  | -16.37 | -18.66 | -9.35  | -4.63  | 0.21   |      |
| 13.97 | 18.12 | 13.31  | 11.12  | 10.34  | 5.08  | 4.45  | 10.08 | 11.95 | 13.42 | 7.36  | 8.48   | 8.23  | 10.69 | 7.18  | 10.09  | 6.01   | 8.59   | 5.94   | -1.48  | 5.08  | 6.53  | 3.86   | 11.64  | 17.51  | 7.58   | 3.64   | 5.44   |      |
| 1.26  | 0.08  | 1.01   | 1.12   | 0.77   | -1.43 | -0.44 | 0.93  | -3.01 | -1.94 | -3.54 | -0.42  | -1.76 | -2.04 | -0.68 | -3.69  | -1.84  | -4.42  | -6.59  | -4.06  | -8.78 | -0.60 | -6.27  | 9.00   | 10.78  | -4.94  | -6.33  | -7.51  |      |
| -1.18 | 0.34  | -1.23  | -2.17  | -1.77  | -2.48 | -3.20 | -0.18 | -0.23 | 0.06  | -1.17 | -1.58  | -1.36 | -0.30 | -0.87 | 0.17   | 1.02   | 1.32   | -2.41  | 0.75   | -0.49 | -0.98 | 0.00   | 0.26   | 0.17   | 0.75   | 0.61   | -0.46  |      |
| 3.24  | 3.18  | 3.03   | 3.68   | 3.38   | 1.76  | 1.90  | 1.63  | 0.88  | 2.08  | 1.27  | 1.97   | 1.07  | 3.55  | 2.15  | 1.84   | 1.41   | 2.77   | 3.28   | 3.28   | 0.49  | 0.89  | 2.15   | 0.14   | 3.14   | 2.90   | 2.02   | 0.66   |      |
| -0.52 | 0.14  | 0.28   | 0.38   | 0.26   | -1.85 | -0.95 | -0.13 | -0.75 | -0.38 | -0.92 | 0.03   | -0.31 | -0.31 | -0.45 | 0.08   | 0.39   | -0.09  | -0.54  | -0.97  | -0.81 | -0.18 | -2.08  | -0.16  | -1.56  | -1.27  | -0.49  | -0.68  |      |
| 1.69  | 3.77  | 3.15   | 1.74   | 1.33   | 3.10  | -0.08 | 2.89  | 1.60  | 1.88  | 2.46  | 0.64   | 0.23  | 2.24  | 0.87  | 2.45   | 2.72   | 2.56   | 2.80   | 4.06   | 2.83  | 1.89  | 2.59   | 1.62   | 3.28   | -0.79  | 0.71   | 1.05   |      |
| -0.89 | -1.36 | -0.08  | -1.20  | 0.06   | -0.67 | -0.84 | -0.47 | -2.43 | -1.24 | -0.48 | -2.26  | -2.27 | -1.67 | -1.41 | -2.52  | -2.46  | -1.92  | -3.81  | -2.64  | -1.56 | -3.20 | -2.12  | -2.47  | -2.17  | -0.55  | -2.34  | -2.87  |      |
| -0.61 | 0.43  | -0.65  | -1.70  | -0.70  | -0.21 | 0.04  | -0.09 | -0.16 | 0.54  | 0.35  | -0.61  | -0.08 | 0.27  | -1.34 | 0.19   | -0.06  | -0.33  | -0.37  | -0.10  | -0.86 | -1.46 | -1.12  | -2.24  | -0.08  | -0.81  | -1.81  | -0.66  |      |
| 2.17  | 1.95  | 1.48   | 0.05   | -0.13  | -1.72 | -0.40 | -0.23 | -0.92 | 0.84  | 2.35  | 0.01   | -0.67 | 1.39  | 1.68  | 0.19   | -1.04  | 0.18   | -1.56  | 0.51   | -0.21 | -0.04 | -0.48  | -1.06  | 0.76   | 2.24   | -0.25  | -0.81  |      |
| 3.31  | 4.57  | 5.07   | 2.66   | 4.93   | 1.87  | 2.20  | 2.81  | 2.94  | 3.03  | 2.73  | 2.12   | 0.95  | 3.14  | 4.07  | 1.92   | 3.49   | 2.98   | 4.36   | 3.04   | 1.78  | 1.37  | 3.30   | 3.92   | -0.61  | 2.94   | 2.81   | 1.61   |      |
| 0.71  | 1.04  | 0.93   | 1.68   | 1.82   | 0.68  | -0.03 | 0.49  | 1.02  | 0.41  | 0.62  | -0.10  | 1.41  | 1.39  | 1.15  | 1.61   | 2.32   | 1.33   | 1.31   | 2.94   | 1.68  | 0.76  | 1.33   | 2.28   | 4.86   | 2.10   | 2.01   | 1.68   |      |
| 1.90  | 2.30  | 0.91   | 1.62   | 1.96   | 1.26  | 0.30  | 2.04  | 0.41  | 1.33  | 1.51  | 0.73   | 0.50  | 2.07  | 1.83  | 2.23   | -2.57  | 0.19   | 0.17   | 1.36   | 1.59  | 1.28  | 0.44   | 0.37   | -0.85  | 2.13   | 1.82   | 0.41   |      |
| 8.22  | 8.06  | 8.60   | 8.81   | 7.29   | 6.32  | 8.45  | 6.62  | 7.38  | 6.10  | 6.96  | 9.72   | 5.91  | 2.33  | 5.37  | 2.28   | 0.16   | 3.22   | 3.24   | 1.39   | 2.61  | 10.31 | 1.06   | -1.34  | -0.01  | 1.39   | 2.43   | 1.87   |      |
| 9.92  | 11.93 | 13.12  | 13.59  | 9.94   | 11.39 | 14.97 | 11.30 | 12.79 | 9.38  | 11.18 | 13.98  | 8.20  | 2.61  | 9.45  | 3.83   | -0.14  | 2.34   | 2.39   | -0.59  | 4.01  | 13.41 | -2.53  | -8.21  | -7.17  | -0.61  | 0.44   | -3.27  |      |
| -4.79 | -4.28 | -4.35  | -6.73  | -2.82  | -5.82 | -5.09 | -4.93 | -6.80 | -7.05 | -5.87 | -6.47  | -4.00 | -5.21 | -0.90 | -4.38  | -5.92  | -7.24  | -4.72  | -5.94  | -6.02 | -7.11 | -8.04  | -10.08 | -8.19  | -8.80  | -5.92  | -8.43  |      |
| 1.13  | -0.48 | 2.29   | 2.25   | 2.29   | 0.52  | 1.02  | 2.56  | 0.90  | 1.12  | 0.47  | 0.43   | 1.16  | 1.70  | -0.27 | -0.95  | -7.60  | -3.02  | -1.42  | -4.84  | 0.15  | -1.64 | -4.32  | -2.27  | -12.29 | -4.67  | -2.15  | -5.68  |      |
| 2.17  | -0.78 | 1.26   | 1.14   | -0.04  | 0.84  | 1.05  | 0.06  | 0.13  | 2.41  | 0.43  | 2.41   | 0.73  | 0.26  | 1.25  | -0.90  | -9.64  | -3.64  | -1.86  | -5.80  | 0.68  | 2.64  | -5.67  | -2.85  | -13.44 | -4.87  | -3.69  | -9.47  |      |
| -0.84 | -5.09 | -0.82  | 2.12   | 0.84   | 0.72  | 0.76  | -0.67 | -2.77 | -2.24 | -1.99 | -1.71  | -1.44 | -0.80 | 0.58  | -2.94  | -8.48  | -4.96  | -1.52  | -4.46  | -3.54 | 0.59  | -4.67  | -5.41  | -8.51  | -5.97  | -5.53  | -6.47  |      |
| -0.92 | 3.18  | 2.47   | 1.95   | 1.14   | -0.38 | 0.40  | 0.08  | 0.28  | 1.70  | 0.72  | 1.11   | 2.15  | 0.46  | 2.50  | 2.35   | 1.21   | 0.71   | 0.65   | 2.14   | 1.01  | -0.09 | -0.43  | 1.41   | 1.36   | -0.57  | 0.49   | -0.84  |      |
| 0.50  | -0.16 | 1.87   | 2.21   | 0.85   | -1.16 | -0.13 | -0.06 | -0.33 | -0.02 | -0.41 | -0.47  | 0.08  | -0.32 | -0.08 | 0.47   | 0.94   | 1.16   | -0.09  | 0.82   | 0.05  | -0.10 | -0.28  | 0.42   | -2.17  | 0.61   | 0.98   | 0.59   |      |
| 1.09  | 2.98  | 3.47   | 1.66   | 2.44   | 0.59  | 1.36  | 2.01  | -0.08 | 0.41  | 0.22  | 0.97   | 2.01  | 1.16  | 1.83  | 1.84   | 2.15   | -0.35  | 3.46   | 2.09   | 1.20  | 0.00  | 1.89   | 0.21   | -0.19  | 0.07   | 2.54   | 0.28   |      |
| 0.99  | 1.82  | 1.91   | 2.43   | 3.69   | -0.46 | -0.97 | 0.23  | 1.01  | 2.22  | 1.11  | -0.41  | 2.24  | 0.29  | -0.29 | -0.57  | 0.98   | 0.15   | 2.19   | 1.29   | -1.39 | 0.02  | 1.09   | 0.02   | 1.03   | 0.66   | 0.67   | 1.59   | 1.10 |
| 2.15  | 2.49  | 2.31   | 2.68   | 2.44   | 0.29  | 0.68  | 1.42  | 1.17  | 1.83  | 1.02  | 1.19   | 2.11  | 1.07  | 2.40  | 2.22   | 2.49   | 1.57   | 1.77   | 1.75   | 1.55  | 1.25  | 1.94   | -0.21  | -1.10  | 1.73   | 1.33   | 1.07   |      |
| 3.99  | 3.39  | 2.22   | 2.52   | 3.04   | 3.62  | 2.33  | 2.76  | 1.86  | 2.81  | 2.49  | 2.25   | 2.59  | 3.74  | 5.23  | 3.58   | 1.84   | 4.03   | 2.61   | 4.66   | 2.78  | 2.62  | 3.82   | 2.60   | 3.24   | 1.15   | 0.73   | 2.12   |      |
| 1.64  | 0.48  | 1.14   | 2.90   | 3.09   | 1.81  | 1.17  | 0.40  | 0.30  | 2.31  | 2.16  | 0.78   | 2.01  | 2.81  | 2.70  | 2.07   | 1.90   | 1.92   | 1.90   | 2.61   | 1.81  | 1.84  | 1.76   | 2.99   | 1.28   | 2.56   | 1.34   | 1.98   |      |
| 2.07  | 3.37  | 2.50   | 1.61   | 1.47   | 0.57  | 1.22  | 1.33  | 1.63  | 2.11  | 1.61  | 1.26   | 1.08  | 1.24  | 1.21  | 1.02   | 2.55   | 2.60   | 3.01   | 1.34   | 0.90  | 1.57  | 2.15   | 0.42   | 1.94   | 2.32   | 1.50   | 1.85   |      |
| 1.46  | 1.28  | 1.91   | 1.85   | 2.20   | 0.86  | -0.16 | -0.32 | 0.63  | 1.68  | -0.13 | 0.47   | 2.08  | 1.71  | 2.93  | 0.03   | 0.41   | 1.52   | 2.86   | 1.41   | 0.92  | 0.06  | 1.47   | 1.46   | -0.41  | 1.20   | 0.93   | 3.13   |      |
| 0.50  | 1.45  | 0.65   | 1.38   | 1.07   | 0.31  | -1.03 | 0.87  | 0.95  | -0.51 | -1.55 | 0.17   | 0.23  | -0.06 | 0.65  | -0.89  | -1.21  | -0.03  | -0.56  | -0.25  | -2.06 | 0.51  | -0.91  | -1.18  | -4.28  | -0.24  | -0.66  | -1.54  |      |
| 0.28  | 1.19  | 1.53   | -0.19  | 1.30   | 0.06  | -0.06 | 0.81  | -0.79 | -0.23 | 0.54  | -0.84  | 0.12  | 0.26  | -0.38 | -0.41  | -0.78  | 0.41   | -0.22  | -0.74  | -0.77 | -0.26 | 0.19   | -0.78  | -0.43  | 0.62   | 0.36   | -0.03  |      |
| -1.15 | 3.34  | 1.83   | 1.54   | 1.21   | 0.46  | 0.37  | 1.51  | 2.65  | 1.91  | 2.33  | 1.17   | 2.34  | 2.91  | 1.94  | 3.89   | 2.00   | 2.73   | 3.14   | 0.44   | 3.26  | 1.42  | 3.61   | 2.92   | 0.83   | 2.06   | 5.58   | 3.66   |      |
| -0.23 | 2.06  | 0.65   | -0.10  | 1.27   | -1.27 | -1.10 | -1.07 | -1.90 | -1.17 | -1.99 | -1.37  | -0.92 | 0.66  | -0.08 | -0.88  | -0.41  | 2.33   | 0.08   | 0.94   | -1.44 | -0.74 | -0.75  | -0.14  | 1.89   | -0.76  | -0.62  | -0.04  |      |
| 2.21  | 1.72  | 2.07   | 1.22   | 1.80   | 1.74  | 1.77  | 2.01  | 1.34  | 1.43  | 1.81  | 1.02   | 1.52  | 1.23  | 0.94  | 2.08   | 1.52   | 3.41   | 2.64   | 2.47   | 0.86  | 0.12  | 1.24   | 1.32   | 3.02   | 2.89   | 1.63   | 1.94   |      |
| -0.22 | 1.75  | 1.73   | 0.26   | 1.37   | 1.00  | 0.01  | 1.21  | 1.37  | 1.37  | -0.03 | 0.30   | 1.50  | 1.43  | -0.68 | -1.16  | -1.77  | 1.26   | 0.48   | 0.08   | -0.63 | 1.08  | -0.21  | -0.44  | 0.70   | 0.43   | -0.21  | -0.56  |      |
| 1.29  | -0.30 | 1.43   | 2.33   | -1.10  | 1.48  | 0.43  | 0.79  | 0.47  | 0.81  | -0.57 | 2.15   | 0.39  | -1.71 | 1.70  | -4.15  | -5.26  | -3.13  | -2.70  | -7.19  | -3.98 | 1.89  | -3.57  | -9.44  | -8.52  | -5.01  | -4.94  | -5.80  |      |
| 1.64  | 0.60  | 1.49   | 2.70   | 1.46   | 0.72  | 1.26  | -0.15 | 1.76  | 1.66  | -0.16 | 3.27   | 0.78  | -0.73 | 1.74  | -4.81  | -8.98  | -2.59  | -2.77  | -5.32  | -1.31 | 2.13  | -2.05  | -8.84  | -7.06  | -4.39  | -5.56  | -6.20  |      |
| -3.01 | -3.78 | -1.75  | -1.32  | -3.22  | 1.01  | 0.72  | -1.15 | -5.19 | -3.73 | -1.91 | -5.54  | -1.50 | -5.19 | 1.50  | -5.95  | -7.38  | -6.65  | -4.96  | -10.63 | -7.72 | -1.51 | -6.81  | -13.84 | -16.23 | -13.03 | -5.46  | -9.60  |      |
| 1.00  | 2.06  | 1.83   | 2.20   | 2.59   | 0.93  | 0.82  | 1.29  | 0.74  | 1.98  | 1.25  | 1.06   | 0.77  | 3.44  | 4.85  | 1.12   | 3.07   | 1.13   | 0.71   | 2.83   | 1.59  | 2.73  | 0.24   | 3.56   | 2.23   | 1.92   | 3.27   | -0.07  |      |
| 2.64  | 1.49  | 1.96   | 3.17   | 3.90   | 1.84  | 3.17  | 2.83  | 1.99  | 1.61  | 1.92  | 1.01   | 2.39  | 4.54  | 3.86  | 3.99   | 4.48   | 3.45   | 3.81   | 4.84   | 4.57  | 4.08  | 4.61   | 5.39   | 3.71   | 4.09   | 5.59   | 2.90   |      |
| 2.06  | 0.97  | 0.59   | 2.60   | 2.18   | 2.33  | 0.39  | 1.85  | 2.71  | -0.65 | 1.20  | 1.46   | 1.94  | 1.16  | 2.81  | -0.57  | 2.45   | 0.44   | 1.55   | 1.42   | 1.39  | 0.93  | -0.81  | -1.91  | -1.34  | -0.46  | 1.37   | -3.43  |      |
| -7.83 | -9.15 | -11.72 | -10.46 | -11.95 | -6.35 | -6.16 | -3.40 | -9.58 | -9.46 | -8.86 | -10.83 | -8.86 | -7.78 | -8.52 | -10.90 | -11.65 | -11.89 | -10.79 | -10.73 | -7.95 | -9.31 | -10.05 | -10.19 | -6.62  | -10.23 | -10.81 | -10.63 |      |
| 0.92  | 0.97  | 1.48   | 2.21   | 2.12   | 0.51  | 0.40  | 1.46  | -0.08 | 1.57  | 1.29  | 1.63   | 1.83  | 1.11  | 1.43  | 1.98   | -0.14  | 2.01   | 0.77   | 1.52   | 1.66  | 0.89  | 0.88   | 0.03   | -0.48  | 1.01   | 0.42   | 0.94   |      |
| 2.19  | -1.03 | 2.20   | 1.69   | 0.34   | 0.21  | 2.12  | 0.94  | -0.85 | -0.12 | -0.34 | 0.04   | -0.81 | -0.31 | 1.54  | 1.19   | 0.14   | 1.44   | 1.87   | 1.41   | 0.98  | 0.57  | 0.     |        |        |        |        |        |      |

|        |        |        |        |        |       |       |        |        |        |        |        |        |       |        |        |        |        |        |        |        |        |        |        |        |        |        |        |       |
|--------|--------|--------|--------|--------|-------|-------|--------|--------|--------|--------|--------|--------|-------|--------|--------|--------|--------|--------|--------|--------|--------|--------|--------|--------|--------|--------|--------|-------|
| 7.32   | 11.16  | 13.43  | 10.65  | 9.32   | 2.64  | 5.51  | 5.26   | 11.63  | 9.71   | 6.81   | 11.33  | 8.53   | 5.97  | 1.97   | 4.48   | 8.59   | 9.48   | 6.41   | 3.37   | 4.50   | 6.35   | 6.55   | 6.81   | 6.50   | 0.97   | 3.29   | -1.09  |       |
| 9.93   | 12.14  | 14.30  | 17.10  | 12.19  | 6.38  | 7.44  | 6.55   | 17.94  | 15.24  | 12.45  | 17.05  | 14.01  | 5.57  | 3.96   | 7.55   | -5.81  | 17.42  | 7.90   | 3.37   | 6.65   | 10.76  | 7.12   | -14.23 | -17.82 | -9.02  | -1.49  | -6.57  |       |
| -4.66  | -7.53  | -4.01  | -5.70  | -0.55  | -0.68 | -8.07 | -1.02  | -9.39  | -7.43  | -3.96  | -12.74 | -6.46  | -6.08 | 1.03   | -6.08  | -12.47 | -0.06  | -1.86  | -3.69  | -3.20  | -2.44  | -6.74  | -20.91 | -26.51 | -7.94  | -6.01  | -11.73 |       |
| 17.20  | 23.92  | 15.93  | 13.00  | 14.59  | 7.17  | 5.39  | 12.95  | 16.60  | 19.39  | 10.28  | 10.88  | 10.43  | 14.12 | 9.62   | 15.70  | 13.88  | 13.68  | 10.17  | 5.59   | 7.94   | 8.32   | 3.99   | 17.85  | 20.18  | 9.88   | 9.78   | 9.85   |       |
| 2.02   | 1.20   | 1.50   | 2.13   | 0.91   | -1.37 | -0.37 | 1.64   | -2.56  | -0.91  | -2.72  | -0.61  | -0.21  | -0.43 | -0.95  | -1.86  | -0.64  | -2.92  | -5.93  | -2.84  | -8.90  | -0.46  | -5.41  | 10.33  | 11.19  | -4.90  | -5.55  | -7.20  |       |
| -1.63  | 0.50   | -0.48  | -2.76  | -0.69  | -1.86 | -3.90 | -0.24  | -0.70  | -0.46  | -1.21  | -1.88  | -1.62  | -0.28 | -1.47  | 0.19   | 4.33   | 0.81   | -1.97  | -0.06  | -0.19  | -1.97  | -0.14  | -10.16 | 2.59   | 0.67   | 1.12   | -0.72  |       |
| 4.49   | 2.84   | 2.74   | 2.99   | 2.59   | 1.97  | 0.99  | 2.28   | 0.72   | 2.13   | 1.30   | 2.12   | 0.86   | 2.79  | 1.68   | 2.29   | 3.93   | 2.60   | 2.40   | 3.77   | 0.16   | 1.61   | 1.10   | -0.14  | 2.47   | 2.86   | 1.73   | 0.27   |       |
| -1.53  | -0.36  | -0.12  | 0.36   | -0.69  | -1.54 | -0.80 | -0.69  | -0.83  | -0.88  | -0.57  | 0.05   | -0.09  | -1.28 | 0.01   | 0.26   | -0.56  | -0.17  | -0.11  | -0.35  | -0.36  | 0.65   | -1.95  | -2.63  | -1.70  | -1.34  | -0.63  | -0.57  |       |
| 2.93   | 3.03   | 2.91   | 2.74   | 4.51   | 4.10  | 0.29  | 3.08   | -0.13  | 1.65   | 1.32   | 0.95   | 0.47   | 3.35  | 1.34   | 2.78   | 2.98   | 2.53   | 2.45   | 4.41   | 2.79   | 1.77   | 3.09   | 1.32   | 0.85   | -0.71  | 1.17   | 0.40   |       |
| -1.12  | -1.58  | 0.02   | -1.10  | 0.03   | 0.32  | -2.03 | -0.19  | -2.44  | -1.18  | 0.21   | -2.73  | -0.03  | -1.78 | -1.55  | -2.34  | -0.84  | -1.06  | -4.11  | -1.68  | -0.82  | -2.51  | -2.54  | -3.11  | -1.27  | -1.51  | -2.67  | -2.27  |       |
| -0.58  | 0.27   | 0.03   | -1.59  | -0.28  | 0.38  | -0.23 | -0.46  | 0.03   | 0.52   | 0.39   | -0.49  | 0.06   | -0.85 | -0.90  | 0.87   | 0.19   | -0.34  | -0.18  | -0.50  | -0.66  | -0.99  | -0.94  | -2.99  | -0.26  | -0.14  | -0.95  | -0.92  |       |
| 1.06   | 2.88   | 0.79   | -0.42  | 0.74   | 0.32  | 0.69  | 0.35   | 0.08   | 0.50   | 0.91   | -0.42  | -0.22  | 1.72  | 0.04   | -0.81  | 0.77   | 1.66   | -0.87  | 1.86   | -0.41  | 0.20   | -0.48  | 0.06   | 0.55   | 3.06   | 0.63   | -1.22  |       |
| 3.49   | 4.03   | 5.06   | 2.57   | 4.49   | 2.93  | 2.13  | 1.74   | 2.13   | 3.36   | 2.06   | 2.81   | 0.82   | 4.04  | 3.97   | 3.33   | 2.12   | 4.74   | 2.41   | 3.61   | 1.96   | 2.23   | 3.88   | 3.09   | 2.52   | 3.30   | 2.33   | 1.57   |       |
| 0.75   | 0.73   | 0.64   | 1.28   | 2.21   | 0.48  | -0.42 | 0.40   | 0.48   | -0.47  | 0.16   | -0.26  | 1.31   | 0.62  | 1.61   | 0.74   | 4.15   | 3.73   | 2.47   | 2.85   | 1.86   | 0.67   | 2.17   | 2.36   | 3.39   | 1.82   | 2.05   | 1.79   |       |
| 1.41   | 1.53   | 0.91   | 1.29   | 2.60   | 0.00  | 1.04  | 1.46   | 1.37   | 2.00   | 2.92   | 0.77   | 0.74   | 1.01  | 3.69   | 1.81   | 0.52   | 2.97   | 1.15   | 0.60   | 1.59   | 2.03   | 1.60   | 0.16   | 4.07   | 2.66   | 1.91   | -0.58  |       |
| 12.50  | 12.05  | 13.25  | 14.39  | 9.77   | 8.98  | 11.88 | 8.42   | 11.99  | 10.78  | 9.51   | 15.43  | 8.53   | 4.04  | 9.30   | 4.97   | 2.52   | 5.91   | 6.39   | 2.71   | 4.80   | 13.46  | 1.64   | -1.50  | 2.52   | 2.80   | 5.53   | 4.14   |       |
| 15.46  | 18.67  | 19.34  | 20.50  | 14.23  | 17.04 | 21.71 | 16.39  | 19.88  | 15.98  | 17.41  | 20.89  | 13.88  | 6.60  | 11.86  | 7.67   | 1.51   | 5.50   | 5.90   | 2.30   | 7.04   | 16.47  | -2.45  | -6.34  | -6.46  | 0.19   | 3.37   | -0.94  |       |
| -6.91  | -7.01  | -7.38  | -8.39  | -3.79  | -7.46 | -8.38 | -7.92  | -9.35  | -9.69  | -7.96  | -8.86  | -6.61  | -5.73 | -1.57  | -7.19  | -5.25  | -8.96  | -7.50  | -5.74  | -7.98  | -7.92  | -8.64  | -13.30 | -9.72  | -10.34 | -6.39  | -10.06 |       |
| 1.51   | -0.97  | 2.10   | 2.30   | 0.62   | 1.38  | 1.19  | 2.59   | 0.67   | 0.64   | 0.63   | 1.49   | 1.88   | 0.00  | 3.36   | -2.17  | -8.72  | -3.02  | 0.32   | -3.61  | -0.37  | 2.18   | -3.79  | -4.40  | -11.13 | -4.67  | -2.35  | -5.97  |       |
| 2.53   | -0.25  | 1.81   | 2.15   | 1.18   | 1.39  | 2.04  | 2.21   | 1.58   | 1.98   | 1.18   | 2.82   | 1.90   | 0.72  | 2.13   | -0.87  | -8.69  | -3.20  | -1.34  | -5.41  | 0.71   | 2.70   | -6.39  | -4.88  | -12.53 | -5.84  | -4.12  | -9.68  |       |
| -1.27  | -6.37  | -2.02  | -0.40  | -1.03  | 0.65  | -0.71 | -0.64  | -4.04  | -3.10  | -2.28  | -3.65  | 0.02   | -1.91 | 0.21   | -1.5   | -7.50  | -6.14  | -3.14  | -5.36  | -4.46  | 0.77   | -5.48  | -8.02  | -8.22  | -5.87  | -5.33  | -7.05  |       |
| 1.07   | 2.39   | 2.68   | 2.10   | 1.23   | 0.74  | -0.08 | 0.04   | 1.25   | 0.26   | 0.41   | 0.43   | 2.54   | 0.32  | 2.49   | 1.80   | -0.71  | 2.30   | 0.59   | 2.16   | -1.01  | 0.49   | -0.12  | 1.08   | 1.92   | 0.70   | 1.08   | 1.79   |       |
| -0.22  | 0.12   | 0.91   | 1.99   | 0.93   | 0.76  | 0.45  | -0.36  | -0.66  | -0.10  | -0.48  | -0.26  | 0.11   | -0.29 | 0.23   | 0.46   | 1.57   | 0.86   | 0.53   | 0.33   | 1.05   | 0.22   | 0.04   | 0.03   | -0.95  | 0.43   | 0.32   | -0.39  |       |
| 1.59   | 3.07   | 3.25   | 1.89   | 2.09   | 0.22  | 1.06  | 1.80   | 0.94   | 0.69   | 0.15   | 0.74   | 1.73   | 1.67  | 2.56   | 1.56   | 0.02   | 0.84   | 3.83   | 2.61   | 1.89   | -0.31  | 1.54   | 0.44   | -0.55  | 0.11   | 0.54   | 0.91   |       |
| 1.71   | 1.77   | 2.98   | 2.72   | 3.75   | -0.50 | -0.47 | 0.62   | 1.57   | 1.26   | 0.25   | 0.56   | 1.81   | 0.45  | 0.98   | -0.19  | 0.78   | -0.41  | 2.41   | 1.72   | -0.56  | 1.06   | 1.86   | 1.02   | 0.12   | 0.84   | 1.33   | 1.59   |       |
| 2.63   | 2.25   | 2.11   | 2.18   | 1.65   | 0.56  | 0.60  | 0.57   | 0.36   | 1.11   | 1.52   | 0.89   | 2.15   | 1.51  | 3.32   | 2.48   | 1.92   | 2.34   | 2.39   | 2.04   | 1.63   | 0.90   | 2.10   | 0.41   | -0.89  | 1.26   | 1.28   | 0.94   |       |
| 4.08   | 4.14   | 3.83   | 3.90   | 4.21   | 2.20  | 3.24  | 4.65   | 2.52   | 3.94   | 3.75   | 2.75   | 3.11   | 3.62  | 5.29   | 3.14   | 4.23   | 5.58   | 4.23   | 6.10   | 3.22   | 3.04   | 2.85   | 2.25   | 4.62   | 2.36   | 2.34   | 2.34   |       |
| 1.58   | 1.84   | 2.13   | 2.99   | 2.25   | 2.38  | 0.92  | 0.80   | 0.81   | 2.36   | 1.60   | 1.58   | 1.30   | 2.56  | 2.73   | 1.91   | 3.48   | 3.81   | 0.82   | 2.84   | 2.28   | 2.86   | 1.50   | 2.60   | 2.17   | 2.94   | 1.19   | 1.99   |       |
| 2.38   | 2.59   | 2.50   | 1.88   | 2.04   | 0.58  | 0.99  | 1.57   | 1.44   | 1.87   | 1.82   | 1.37   | 1.47   | 1.30  | 1.39   | 1.17   | 3.01   | 2.41   | 3.24   | 1.45   | 1.45   | 1.33   | 2.02   | 0.52   | 1.65   | 2.53   | 1.63   | 2.08   |       |
| 1.57   | 2.06   | 3.63   | 2.97   | 2.02   | 3.33  | 0.65  | 0.47   | 1.59   | 0.22   | -0.08  | -1.05  | 2.09   | 1.84  | 2.43   | 1.10   | 4.14   | 0.99   | 3.72   | 3.50   | 1.83   | 1.64   | 1.44   | 0.97   | 3.34   | 2.30   | 3.33   | 1.54   |       |
| 0.11   | 2.08   | 0.53   | 0.52   | 0.71   | 0.75  | -0.56 | 0.10   | 0.09   | -0.71  | -2.20  | -0.57  | -0.04  | -0.63 | 0.44   | -1.63  | -1.99  | 1.39   | -1.67  | 0.48   | -2.08  | 0.01   | -0.71  | -2.62  | -4.89  | 0.09   | -0.93  | -2.58  |       |
| 0.30   | 0.34   | 0.51   | -0.98  | 1.29   | -0.21 | -1.01 | -0.43  | -0.65  | -0.55  | -0.29  | -1.03  | -0.33  | -0.41 | -0.49  | -0.85  | -3.32  | 0.12   | 0.93   | -0.30  | -0.74  | -0.52  | 0.64   | -0.42  | -1.26  | 0.22   | -0.40  | -0.82  |       |
| 1.37   | 3.66   | 1.93   | 2.50   | 1.40   | 0.51  | 0.58  | 1.36   | 0.97   | 1.28   | 1.24   | 0.73   | 1.19   | 2.17  | 2.43   | 2.90   | 1.28   | 2.33   | 2.68   | 0.93   | 2.89   | 2.53   | 3.87   | 4.84   | 2.07   | 3.19   | 0.94   | 2.75   |       |
| -0.04  | 1.27   | 0.31   | 0.07   | 1.04   | -3.16 | -4.10 | -2.44  | -0.43  | -0.46  | -3.41  | -2.69  | -1.88  | -0.63 | 0.37   | -0.97  | -1.74  | 2.90   | 0.14   | 1.05   | -2.58  | -0.19  | -0.88  | -2.14  | 0.63   | -0.25  | -5.54  | -0.40  |       |
| 1.71   | 1.32   | 2.44   | 1.38   | 1.81   | 3.08  | 2.29  | 2.30   | 0.82   | 0.88   | 1.97   | 1.40   | 1.65   | 0.16  | 1.13   | 2.45   | 3.95   | 3.71   | 3.03   | 2.70   | 1.06   | 0.56   | 1.20   | 0.48   | 5.26   | 2.71   | 1.87   | 2.48   |       |
| 0.47   | 0.94   | 2.68   | -0.52  | 1.21   | 1.53  | 0.11  | 1.06   | 3.44   | 1.13   | -0.11  | 0.89   | 1.53   | 0.39  | -0.83  | -1.48  | -0.61  | 0.02   | 1.17   | 0.22   | -0.72  | 0.92   | 0.50   | -2.82  | 1.81   | 1.06   | 0.29   | -0.29  |       |
| 1.63   | -0.14  | 1.85   | 2.66   | 0.59   | 1.24  | 0.08  | 0.95   | 0.24   | 1.58   | -0.50  | 3.37   | 0.51   | -2.22 | 1.66   | -6.49  | -5.02  | -5.60  | -1.80  | -6.15  | -3.22  | 0.93   | -4.34  | -9.87  | -10.86 | -6.42  | -4.96  | -6.82  |       |
| 1.22   | 1.03   | 2.41   | 3.51   | 1.25   | 1.47  | 1.90  | 0.52   | 2.18   | 2.06   | -0.29  | 2.99   | 0.60   | -2.01 | 2.85   | -0.55  | -8.94  | -3.35  | -2.45  | -5.70  | -1.62  | 1.89   | -2.28  | -9.07  | -7.59  | -4.28  | -5.43  | -6.88  |       |
| -5.58  | -6.05  | -5.19  | -4.04  | -3.78  | -0.79 | -1.16 | -2.08  | -7.35  | -5.94  | -2.00  | -7.97  | -3.38  | -7.13 | 0.38   | -7.52  | -8.39  | -12.17 | -5.64  | -11.80 | -7.66  | -3.04  | -6.54  | -15.31 | -16.75 | -13.18 | -7.96  | -11.14 |       |
| 1.75   | 1.52   | 1.27   | 2.05   | 3.10   | 1.46  | 0.68  | 0.82   | -0.63  | 0.28   | 1.21   | 0.35   | 0.65   | 2.01  | 5.39   | 1.68   | 4.00   | 1.81   | 0.42   | 2.38   | 0.34   | 1.68   | -0.24  | 3.49   | 2.85   | 1.18   | 2.02   | 0.93   |       |
| 1.29   | 0.71   | 1.00   | 2.28   | 2.17   | 2.47  | 2.70  | 3.13   | 0.82   | 1.01   | 1.33   | -0.69  | 1.84   | 4.44  | 4.19   | 3.48   | 4.26   | 3.38   | 3.98   | 5.11   | 4.68   | 4.78   | 4.73   | 5.39   | 5.78   | 3.63   | 5.36   | 2.94   |       |
| 3.94   | 3.58   | 0.87   | 1.52   | 2.58   | 1.83  | 0.65  | 1.52   | 2.33   | 0.45   | 2.11   | 2.27   | 2.17   | 2.25  | 1.74   | 1.50   | 0.34   | 1.93   | 2.13   | 3.08   | 1.15   | 1.10   | 0.48   | 0.58   | -1.77  | -4.37  | -0.55  | 2.90   | -0.78 |
| -10.56 | -12.09 | -14.55 | -13.23 | -13.43 | -6.39 | -7.15 | -10.31 | -11.43 | -12.50 | -10.39 | -12.62 | -10.73 | -9.42 | -10.88 | -11.70 | -12.86 | -13.70 | -12.90 | -11.17 | -10.10 | -10.77 | -12.62 | -12.27 | -8.09  | -12.20 | -11.82 | -13.17 |       |
| 1.54   | 0.90   | 2.03   | 1.94   | 2.09   | 0.12  | 0.62  | 1.10   | -0.19  | 1.39   | 1.84   | 1.74   | 3.63   | 1.14  | 1.81   | 2.21   | 1.37   | 1.83   | 1.97   | 1.69   | 2.12   | 1.02   | 1.91   | 0.11   | 0.70   | 0.84   | 0.54   | 0.94   |       |
| 2.36   | -0.39  | 0.73   | 2.44   | 1.53   | 1.02  | 0.44  | 1.50   | -0.35  | 1.13   | 0.36   | -0.32  | 1.51   | 1.50  | 1.86   | 2.04   | 1.25   | 2.28   | 1.20   | 1.00   | 2.30   | 2.04   | 0.24   | 0.69   | 0.53   | 0.92   | 0.90   | -0.33  |       |
| -0.90  | 0.51   | 1.16   | -0.08  | 0.64   | 0.28  | 0.10  | 0.47   | -0.60  | -1.23  | -1.19  | -1.35  | -0.76  | -0.81 | -1.51  | -0.82  | -0.48  | 1.32   | -0.60  | 0.67   | -0.59  | 0.66   | 0.86   | 0.25   | 0.63   | -0.22  | -1.06  | -0.64  |       |
| 0.27   | -0.23  | 0.48   | -0.54  | 0.28   | -0.43 | -0.70 | -0.27  | -1.27  | 0.34   | 0.28   | -1.04  | -0.52  | -1.15 | -0.37  | -1.59  | 1.67   | -0.45  | -0.32  | -0.21  | -0.97  | -0.21  | -0.96  | -1.17  | -1.36  | -0.34  | -1.08  | -0.24  |       |
| 2.56   | 1.49   | 1.35   | 3.16   | 2.09   | 0.53  | 1.01  | -0.04  | 1.00   | -0.77  | 0.71   | 2.64   | -0.12  | 1.39  | 1.62   | -0.42  | 1.42   |        |        |        |        |        |        |        |        |        |        |        |       |

|        |        |        |        |        |        |        |        |        |        |        |        |        |        |        |        |        |        |        |        |        |        |        |        |        |        |        |        |
|--------|--------|--------|--------|--------|--------|--------|--------|--------|--------|--------|--------|--------|--------|--------|--------|--------|--------|--------|--------|--------|--------|--------|--------|--------|--------|--------|--------|
| 21.54  | 28.32  | 18.94  | 16.90  | 19.19  | 7.42   | 6.25   | 15.26  | 20.11  | 23.55  | 11.23  | 12.45  | 12.63  | 17.08  | 12.17  | 21.02  | 16.27  | 16.07  | 12.50  | 11.00  | 8.11   | 8.50   | 6.14   | 20.90  | 22.70  | 8.86   | 14.27  | 11.43  |
| 2.32   | 1.74   | 2.24   | 3.06   | 1.38   | -1.01  | 0.28   | 1.15   | -1.89  | -0.92  | -2.31  | 0.37   | 0.23   | 0.03   | -0.21  | -1.93  | -0.21  | -2.73  | -4.92  | -2.49  | -8.33  | -0.49  | -5.89  | 11.23  | 11.00  | -4.74  | -5.81  | -6.97  |
| -0.72  | 0.26   | -0.43  | -2.79  | -0.61  | -1.84  | -3.43  | -0.38  | -0.14  | 0.06   | -0.78  | -2.28  | -1.41  | -0.64  | -1.94  | 1.14   | 4.32   | 0.54   | -1.97  | -0.14  | -0.36  | -0.91  | 0.00   | 0.64   | 3.70   | 0.39   | 0.45   | -0.66  |
| 3.66   | 2.42   | 3.02   | 3.47   | 1.67   | 1.23   | 1.67   | 1.58   | -0.07  | 1.68   | 1.10   | 1.68   | 1.42   | 2.91   | 3.11   | 2.87   | 4.32   | 2.81   | 3.54   | 3.60   | 1.10   | 1.48   | 1.30   | 0.05   | 2.25   | 3.07   | 2.34   | -0.62  |
| -1.23  | 0.48   | 0.28   | 0.17   | 0.09   | -1.11  | -0.82  | 0.06   | -0.66  | -1.10  | -1.12  | -0.03  | -0.26  | -1.23  | -0.16  | 0.64   | 0.12   | 0.34   | -0.10  | -0.53  | -0.59  | -0.19  | -1.64  | -2.08  | -1.56  | -1.61  | -0.66  | -0.70  |
| 2.41   | 3.08   | 2.99   | 3.10   | 1.41   | 3.05   | 0.25   | 2.77   | 0.91   | 1.90   | 1.77   | 0.34   | 0.25   | 2.73   | 1.13   | 2.40   | 3.43   | 2.64   | 2.74   | 4.08   | 2.57   | 2.90   | 1.93   | 2.25   | 1.07   | 0.30   | 0.66   | 0.70   |
| -0.25  | 0.06   | 0.12   | -0.95  | 0.23   | 0.25   | -0.93  | 0.19   | -2.63  | -0.80  | 0.90   | -2.22  | 0.11   | -1.70  | -1.10  | -2.25  | -1.68  | -2.41  | -2.74  | -1.84  | -0.84  | -2.82  | -3.05  | -3.21  | -0.48  | -1.88  | -2.80  | -3.26  |
| -0.26  | 0.97   | 0.57   | -0.14  | 0.52   | 0.19   | 0.50   | -0.22  | -0.03  | 0.67   | 0.19   | -0.58  | 0.19   | -0.43  | -1.02  | 0.03   | 0.21   | -0.11  | -0.26  | 0.53   | -1.31  | -1.10  | -1.35  | -2.70  | -0.43  | -0.73  | -1.02  | -0.09  |
| 1.41   | 2.17   | 1.94   | 0.18   | 0.29   | 0.01   | 1.75   | 1.14   | -0.28  | 0.10   | 1.20   | -0.56  | -0.11  | 2.23   | 1.98   | 0.92   | 0.23   | 0.95   | -0.63  | 1.28   | -0.28  | 0.56   | -1.52  | -1.00  | 1.20   | 1.54   | -3.04  | -0.92  |
| 3.62   | 4.08   | 5.25   | 2.95   | 4.80   | 2.67   | 2.45   | 2.13   | 2.97   | 1.95   | 2.79   | 2.78   | 2.92   | 2.97   | 5.28   | 3.36   | 3.75   | 4.58   | 3.21   | 3.52   | 3.09   | 2.38   | 3.21   | 4.36   | 3.20   | 3.77   | 2.95   | 1.92   |
| 0.52   | 0.35   | 0.37   | 0.85   | 1.51   | 0.17   | -0.77  | 0.02   | -0.26  | -0.39  | -1.08  | -0.54  | -0.93  | 1.73   | 1.04   | 1.19   | 3.29   | 2.21   | 2.59   | 2.28   | 1.82   | 1.21   | 2.26   | 2.79   | 3.58   | 2.58   | 1.95   | 1.71   |
| 1.12   | 2.77   | 1.20   | 2.15   | 2.90   | 0.26   | 0.79   | 2.11   | 1.58   | 1.63   | 2.96   | 1.46   | 2.27   | 2.65   | 3.44   | 3.00   | -0.24  | 2.24   | 1.82   | 1.40   | 2.45   | 1.61   | 1.93   | 2.77   | 0.15   | 2.54   | 1.82   | 0.75   |
| 17.19  | 16.52  | 17.26  | 18.49  | 14.33  | 11.95  | 16.35  | 12.10  | 16.37  | 15.96  | 13.99  | 19.84  | 12.54  | 6.10   | 12.05  | 6.72   | 4.01   | 7.19   | 7.83   | 3.71   | 4.16   | 12.62  | 1.31   | -0.63  | 2.74   | 2.67   | 6.97   | 5.83   |
| 24.95  | 27.81  | 28.53  | 28.90  | 20.44  | 24.43  | 27.75  | 23.57  | 30.07  | 25.81  | 25.21  | 30.90  | 21.30  | 10.81  | 15.77  | 10.39  | 2.27   | 8.37   | 8.57   | 4.78   | 8.50   | 16.66  | -1.54  | -5.75  | -4.84  | -0.01  | 8.67   | 1.08   |
| -11.23 | -10.76 | -8.95  | -11.70 | -6.81  | -10.53 | -10.71 | -10.95 | -12.94 | -15.05 | -12.40 | -11.74 | -8.66  | -8.90  | -2.29  | -6.99  | -6.25  | -9.32  | -7.07  | -7.82  | -7.49  | -8.31  | -9.50  | -13.32 | -9.52  | -9.89  | -9.14  | -11.36 |
| 1.81   | 0.50   | 2.29   | 3.01   | 1.10   | 1.15   | 1.66   | 2.82   | 1.86   | 2.10   | 1.43   | 1.18   | 2.34   | 0.68   | 2.25   | -2.12  | -9.72  | -2.31  | 0.79   | -4.63  | 0.05   | 3.67   | -3.81  | -3.08  | -13.19 | -4.32  | -2.93  | -6.01  |
| 3.88   | 0.01   | 2.24   | 3.00   | 0.86   | 2.32   | 2.33   | 1.03   | 2.08   | 3.26   | 2.07   | 4.30   | 1.40   | 1.06   | 2.99   | -1.74  | -9.61  | -2.36  | -1.17  | -6.43  | 0.32   | 3.02   | -6.20  | -5.06  | -14.19 | -5.84  | -3.86  | -10.07 |
| -4.10  | -6.23  | -3.04  | -1.88  | -1.72  | -1.18  | -1.56  | -1.67  | -6.37  | -6.39  | -3.66  | -7.69  | -2.70  | -3.01  | -0.34  | -4.67  | -9.34  | -7.02  | -3.66  | -5.43  | -3.45  | 0.57   | -7.29  | -7.40  | -14.48 | -8.67  | -6.75  | -9.66  |
| 0.70   | 2.01   | 2.90   | 2.07   | 1.18   | 1.35   | -0.01  | -0.12  | 0.63   | 1.39   | 0.10   | 0.79   | 1.24   | 1.56   | 1.82   | 2.46   | 1.56   | 1.96   | 1.15   | 2.45   | -0.57  | 1.65   | -0.29  | 1.51   | 2.26   | 0.05   | 0.28   | 1.06   |
| -0.34  | 0.31   | 0.90   | 2.17   | 0.68   | -0.60  | -0.26  | -0.12  | -0.36  | -1.30  | -0.14  | -0.48  | -0.16  | -0.25  | 0.96   | 0.76   | 2.20   | 1.58   | -0.30  | 0.13   | 0.47   | 0.12   | -0.01  | 0.43   | -1.58  | 0.46   | 0.28   | 0.24   |
| 2.70   | 2.66   | 3.25   | 1.94   | 2.24   | 0.11   | 0.74   | 1.87   | 0.63   | 0.36   | 0.47   | 0.39   | 2.88   | 1.17   | 2.66   | 2.30   | -0.49  | 1.08   | 3.50   | 3.03   | 2.16   | 1.19   | 1.39   | 0.41   | 0.55   | 0.07   | 1.81   | 0.84   |
| 2.43   | 2.10   | 3.25   | 3.33   | 4.05   | -1.21  | -1.25  | -0.70  | 2.06   | 1.21   | 0.31   | -0.31  | 2.04   | 0.61   | 1.07   | 1.34   | 0.96   | 0.34   | 1.75   | 2.00   | -0.57  | 1.58   | 0.99   | 1.24   | -3.02  | 1.31   | 0.86   | 1.97   |
| 1.98   | 2.65   | 2.23   | 2.83   | 2.50   | 0.25   | 0.77   | 1.37   | 1.34   | 1.48   | 1.02   | 1.37   | 2.17   | 1.59   | 3.26   | 2.91   | 2.90   | 2.30   | 2.93   | 1.78   | 1.87   | 1.63   | 1.53   | 0.54   | 0.82   | 0.85   | 1.98   | 1.03   |
| 6.00   | 4.15   | 3.30   | 4.41   | 4.51   | 4.40   | 4.25   | 5.22   | 2.21   | 4.01   | 4.47   | 1.91   | 3.32   | 4.05   | 5.01   | 6.17   | 5.21   | 4.41   | 4.01   | 6.63   | 3.39   | 2.59   | 3.75   | 2.90   | 4.69   | 2.74   | 2.89   | 2.86   |
| 1.62   | 1.45   | 0.78   | 3.37   | 2.75   | 1.55   | 0.79   | 1.43   | 0.74   | 0.99   | 1.66   | 0.80   | 1.49   | 2.76   | 2.75   | 2.72   | 3.89   | 3.10   | 1.10   | 2.36   | 2.07   | 2.23   | 1.49   | 3.21   | 1.68   | 3.15   | 1.88   | 2.25   |
| 2.50   | 3.32   | 3.03   | 2.59   | 1.77   | 0.89   | 1.44   | 1.65   | 1.37   | 2.26   | 2.04   | 1.28   | 0.95   | 1.82   | 1.69   | 1.71   | 3.94   | 2.88   | 3.91   | 1.85   | 0.69   | 2.20   | 2.40   | 3.05   | 1.75   | 2.54   | 1.60   | 1.78   |
| 1.62   | 1.63   | 1.41   | 2.45   | 2.73   | 0.94   | -0.09  | 0.44   | 0.59   | 0.55   | -0.69  | -0.63  | 1.48   | 1.48   | 2.93   | 0.64   | 1.42   | 0.86   | 2.58   | 1.88   | 1.84   | 0.92   | 1.93   | 1.93   | 1.38   | 2.29   | 3.00   | 1.94   |
| 0.47   | 1.13   | 1.14   | 0.58   | 0.02   | 0.46   | -0.10  | -0.06  | 0.26   | -1.57  | -0.91  | 0.54   | -0.20  | 0.15   | 1.71   | -1.86  | -1.10  | 2.27   | -1.82  | 0.76   | -0.49  | 0.30   | -1.02  | -0.05  | -4.34  | -0.40  | -1.18  | -3.20  |
| -0.78  | -0.77  | -0.61  | -0.97  | 0.71   | -1.22  | -1.14  | -1.44  | -1.61  | -2.39  | -1.86  | -2.77  | -0.29  | -1.03  | -0.86  | -0.65  | -1.05  | 1.53   | 0.23   | -0.82  | -1.23  | -0.30  | -0.29  | -0.58  | 0.24   | 0.53   | -0.85  | -0.45  |
| 1.09   | 4.06   | 2.97   | 2.16   | 1.55   | 1.98   | 0.73   | 2.91   | 2.49   | 2.37   | 2.37   | 0.97   | 2.93   | 3.26   | 2.85   | 3.88   | 3.08   | 3.17   | 3.69   | 0.90   | 3.41   | 2.26   | 3.17   | 7.14   | -1.61  | 3.07   | 0.33   | 1.35   |
| -1.35  | -0.72  | -0.84  | -0.83  | 0.16   | -6.02  | -7.48  | -3.76  | -3.55  | -2.67  | -6.35  | -3.05  | -5.60  | -0.22  | 0.42   | -0.96  | -0.17  | 2.69   | -0.76  | 0.60   | -2.39  | -0.83  | -0.90  | -1.68  | -2.90  | -0.27  | 1.69   | -0.90  |
| 2.64   | 2.93   | 2.73   | 1.77   | 2.37   | 3.38   | 3.58   | 2.72   | 1.94   | 1.37   | 3.14   | 1.26   | 2.93   | 1.12   | 1.51   | 2.14   | 3.89   | 3.94   | 3.87   | 2.58   | 0.76   | 0.55   | 1.20   | 0.57   | 3.31   | 3.30   | 2.02   | 2.10   |
| 1.00   | 0.66   | 2.06   | 0.90   | 0.71   | 2.38   | 0.10   | 5.00   | 1.95   | 0.41   | 0.63   | 0.81   | 2.28   | 1.44   | -0.69  | -0.42  | 0.86   | 1.17   | 0.06   | 1.76   | -0.10  | 1.55   | 0.09   | -1.96  | -0.96  | 0.80   | 1.22   | 0.49   |
| 3.12   | 0.25   | 1.88   | 3.94   | 0.64   | 1.73   | 0.08   | 0.25   | 2.83   | 2.13   | 0.56   | 5.29   | 2.78   | -2.09  | 1.45   | -4.84  | -5.43  | -2.35  | -2.35  | -6.42  | -3.50  | 2.48   | -3.28  | -10.56 | -9.65  | -5.47  | -5.77  | -6.75  |
| 3.22   | 1.66   | 2.77   | 4.17   | 1.57   | 1.50   | 2.29   | 1.03   | 2.70   | 2.37   | -0.26  | 4.57   | 1.57   | -1.60  | 3.38   | -5.18  | -10.08 | -2.52  | -2.25  | -6.74  | -1.80  | 2.63   | -2.01  | -9.74  | -8.94  | -4.41  | -5.71  | -7.31  |
| -0.73  | -7.23  | -6.80  | -6.40  | -5.25  | -0.89  | -3.35  | -4.84  | -10.30 | -10.00 | -2.91  | -12.03 | -4.32  | -7.96  | 0.18   | -5.74  | -7.62  | -10.68 | -6.64  | -11.89 | -9.98  | -3.28  | -8.65  | -16.41 | -16.56 | -14.57 | -10.21 | -11.61 |
| 0.72   | 1.32   | 1.50   | 0.93   | 2.23   | 0.69   | 0.10   | 1.03   | -2.24  | -0.83  | -0.27  | -1.11  | 0.80   | 2.32   | 3.96   | 1.52   | 4.11   | 2.23   | 4.01   | 2.30   | -0.20  | 1.81   | 0.92   | 3.55   | 4.52   | 2.25   | 1.88   | 3.46   |
| 0.22   | -0.90  | -0.63  | 1.06   | 1.22   | 1.43   | 1.63   | 2.03   | -1.06  | -0.32  | 1.75   | -2.74  | 1.43   | 4.27   | 4.31   | 3.10   | 4.36   | 2.89   | 3.69   | 4.76   | 4.32   | 3.80   | 3.67   | 5.34   | 5.06   | 3.91   | 5.50   | 4.43   |
| 4.30   | 1.07   | 5.00   | 1.15   | 2.16   | 1.81   | 1.04   | 2.30   | 0.98   | 0.40   | 2.24   | 3.63   | 1.71   | 1.80   | 3.37   | 2.62   | 1.45   | 1.66   | 1.69   | 5.19   | 1.88   | 0.23   | 2.00   | -0.20  | -0.83  | -2.66  | -0.60  | -3.56  |
| -13.06 | -13.59 | -16.30 | -14.23 | -16.54 | -8.42  | -8.85  | -11.30 | -13.03 | -14.20 | -12.46 | -15.09 | -12.94 | -11.14 | -13.42 | -12.63 | -15.41 | -15.39 | -14.49 | -14.81 | -11.90 | -12.32 | -15.21 | -12.12 | -10.33 | -14.10 | -14.70 | -14.02 |
| 1.52   | 1.28   | 1.85   | 3.08   | 2.62   | 0.42   | 0.47   | 1.01   | 0.57   | 1.18   | 1.47   | 1.69   | 2.40   | 0.78   | 1.95   | 3.05   | 1.95   | 1.97   | 2.12   | 2.49   | 2.62   | 0.50   | 1.59   | 0.90   | 1.05   | 1.01   | 1.47   | 1.11   |
| 2.76   | 0.79   | 2.20   | 2.15   | 2.66   | 0.94   | 1.97   | 1.28   | -0.49  | 0.41   | 0.69   | 0.50   | -0.17  | 2.09   | 1.57   | 1.75   | 2.45   | 3.17   | 2.58   | 2.46   | 2.51   | 1.87   | -1.30  | 0.45   | 0.71   | 2.75   | 0.69   | 0.37   |
| -1.46  | 1.11   | 0.48   | 0.28   | -0.18  | -0.12  | -0.17  | 0.23   | -1.37  | -0.99  | 0.63   | -1.89  | -0.61  | -0.30  | -0.79  | -0.50  | 1.83   | 1.59   | 1.09   | 1.01   | -0.21  | 0.58   | 0.26   | 0.44   | 1.29   | 0.33   | -1.01  | -0.48  |
| -0.05  | 0.22   | 0.69   | -0.14  | 0.35   | -0.03  | -0.67  | -0.43  | -0.83  | 0.03   | -0.43  | -0.55  | -0.56  | -0.73  | -0.67  | -1.54  | 0.83   | 0.03   | 0.31   | -0.71  | -1.53  | -0.64  | -1.11  | -1.62  | -0.90  | 0.59   | -1.19  | -0.51  |
| 1.49   | 0.79   | 0.57   | 3.13   | 1.92   | 0.47   | 1.20   | 2.19   | 1.45   | -0.54  | 0.77   | 3.08   | 1.31   | 1.66   | 2.66   | 0.22   | 2.35   | 2.59   | 1.09   | 2.46   | -0.03  | 2.34   | 1.64   | 4.15   | 1.97   | 1.31   | 0.45   | 0.69   |
| -5.28  | 2.36   | -3.73  | -1.73  | -8.88  | -1.78  | -2.81  | -0.11  | -3.94  | -3.50  | -3.74  | -6.57  | -3.42  | -6.27  | -6.34  | -12.79 | 12.31  | 4.23   | -1.95  | -6.57  | -16.22 | -11.32 | -7.73  | -4.55  | 4.74   | -11.63 | -11.05 | 2.56   |
| -7.96  | 2.56   | -7.48  | -5.38  | -12.01 | -3.42  | -3.25  | -1.26  | -6.65  | -5.43  | -4.19  | -11.90 | -2.28  | -12.76 | -13.70 | -17.32 | 5.17   | 6.12   | -3.53  | -10.65 | -21.81 | -17.96 | -11.81 | -1.94  | 3.31   | -14.04 | -13.82 | -4.59  |
| -15.06 | -0.01  | -10.29 | -8.14  | -19.10 | -4.68  | -8.76  | 1.46   | -12.41 | -8.47  | -7.74  | -16.90 | -2.27  | -18.73 | -20.8  |        |        |        |        |        |        |        |        |        |        |        |        |        |

|        |        |        |        |        |        |        |        |        |        |        |        |        |        |        |        |        |        |        |        |        |        |        |        |        |        |        |        |      |
|--------|--------|--------|--------|--------|--------|--------|--------|--------|--------|--------|--------|--------|--------|--------|--------|--------|--------|--------|--------|--------|--------|--------|--------|--------|--------|--------|--------|------|
| 3.63   | 1.51   | 2.83   | 3.71   | 1.34   | 0.77   | 1.87   | 1.15   | 0.21   | 0.18   | 1.06   | 0.48   | 0.81   | 2.57   | 0.89   | 3.35   | 1.47   | 3.70   | 2.30   | 2.23   | -0.30  | -0.36  | 1.10   | 1.29   | 1.19   | 0.95   | 2.51   | 1.99   | 1.37 |
| -0.82  | 0.74   | 0.04   | -0.63  | 0.74   | -1.50  | -0.65  | 0.28   | -0.40  | -0.40  | -0.42  | 0.51   | -0.18  | -0.56  | 0.10   | 0.18   | -0.08  | -0.21  | 0.43   | -0.63  | -0.03  | 0.23   | -2.43  | -2.61  | -0.42  | -0.94  | -1.03  | -1.25  |      |
| 1.37   | 2.84   | 2.40   | 3.30   | 0.95   | 2.71   | -0.43  | 1.15   | -0.05  | 1.50   | 1.14   | 0.26   | 0.02   | 2.45   | 1.77   | 3.22   | 3.09   | 2.65   | 2.59   | 4.41   | 2.53   | 3.19   | 2.47   | 1.61   | 1.87   | -0.62  | 1.10   | 1.47   |      |
| 0.05   | 1.10   | 0.85   | -0.46  | 0.25   | 0.06   | -1.58  | 0.25   | -1.79  | -0.06  | 0.99   | -0.98  | 0.63   | -1.63  | -1.73  | -2.86  | -1.74  | -0.61  | -2.79  | -0.66  | -1.79  | -3.59  | -3.50  | -4.76  | -1.68  | -1.63  | -2.33  | -3.17  |      |
| 0.14   | 0.94   | 1.50   | 0.18   | 0.59   | -0.14  | 0.43   | 0.07   | 0.51   | 1.14   | 1.54   | 0.56   | 0.81   | -0.33  | -1.29  | 1.24   | 0.14   | -1.20  | -0.63  | -0.79  | -1.10  | -1.62  | -1.71  | -2.73  | -0.61  | -1.07  | -1.06  | -0.77  |      |
| 2.83   | 2.64   | 2.08   | 1.81   | 1.77   | -0.72  | 1.43   | 1.12   | 0.45   | 1.52   | 1.99   | -0.34  | 0.17   | 2.38   | 1.46   | 1.01   | 0.57   | 1.36   | 0.39   | 1.52   | -0.03  | -0.54  | -0.28  | 0.76   | 1.07   | 1.13   | 1.41   | -0.86  |      |
| 4.54   | 5.50   | 5.31   | 3.37   | 5.05   | 2.39   | 3.31   | 2.64   | 2.38   | 3.75   | 3.56   | 3.12   | 2.99   | 4.92   | 4.99   | 3.52   | 4.62   | 4.49   | 3.70   | 3.10   | 3.07   | 2.61   | 4.03   | 6.19   | 0.94   | 4.17   | 3.15   | 2.26   |      |
| -0.76  | -0.68  | 0.17   | 0.56   | 1.06   | -0.58  | -2.07  | -0.70  | -0.59  | -1.41  | -1.48  | -1.44  | -1.06  | 1.28   | 1.46   | 1.17   | 3.10   | 3.15   | 1.89   | 2.20   | 2.40   | 1.60   | 2.41   | 3.19   | 5.12   | 3.02   | 2.26   | 2.21   |      |
| 2.20   | 4.03   | 1.79   | 2.47   | 4.03   | 1.54   | 2.32   | 3.30   | 1.56   | 2.01   | 4.69   | 1.73   | 1.88   | 3.06   | 3.55   | 3.54   | -0.92  | 3.54   | 2.02   | 1.42   | 2.54   | 1.77   | 1.97   | 1.69   | 0.72   | 2.39   | 2.68   | 1.96   |      |
| 24.36  | 22.29  | 22.25  | 24.90  | 18.89  | 15.94  | 19.44  | 16.39  | 22.30  | 23.18  | 18.86  | 24.58  | 16.56  | 8.67   | 12.28  | 7.39   | 1.53   | 8.25   | 5.52   | 5.21   | 12.70  | 1.84   | 0.25   | 4.83   | 2.62   | 7.92   | 5.08   |        |      |
| 36.03  | 37.76  | 36.94  | 38.01  | 29.25  | 30.51  | 34.78  | 29.54  | 39.23  | 37.98  | 32.25  | 41.64  | 28.85  | 12.03  | 16.69  | 12.20  | 0.76   | 8.92   | 9.89   | 8.25   | 7.71   | 15.95  | -0.25  | -0.09  | -5.88  | -0.55  | 9.78   | 0.66   |      |
| -13.82 | -14.73 | -13.39 | -15.10 | -9.27  | -12.77 | -11.31 | -13.38 | -15.99 | -19.08 | -14.49 | -15.80 | -12.12 | -8.39  | -4.13  | -7.70  | -8.81  | -8.99  | -7.59  | -8.79  | -7.21  | -7.19  | -9.62  | -13.67 | -9.19  | -9.86  | -10.26 | -11.87 |      |
| 3.68   | -0.20  | 3.33   | 2.72   | 7.00   | 1.82   | 2.37   | 3.61   | 1.63   | 3.04   | 1.56   | 1.77   | 2.66   | 0.70   | 3.53   | -1.69  | -9.95  | -2.70  | 0.95   | -4.81  | 1.01   | 3.66   | -4.61  | -4.94  | -13.60 | -5.03  | -3.16  | -6.41  |      |
| 4.63   | 1.91   | 3.79   | 4.57   | 2.34   | 2.61   | 4.09   | 2.34   | 4.03   | 5.24   | 3.83   | 6.19   | 3.42   | 1.10   | 3.15   | -0.79  | -9.85  | -2.86  | -1.09  | -6.04  | 1.84   | 3.75   | -5.80  | -5.98  | -13.47 | -6.11  | -4.01  | -10.66 |      |
| -7.10  | -11.52 | -7.02  | -7.16  | -4.14  | -2.64  | -6.94  | -5.21  | -10.66 | -10.17 | -8.54  | -13.66 | -5.02  | -2.93  | 0.42   | -5.49  | -9.55  | -6.43  | -2.87  | -6.44  | -4.14  | -3.05  | -6.94  | -9.00  | -15.59 | -8.70  | -7.13  | -8.47  |      |
| 0.43   | 2.67   | 1.77   | 2.09   | 0.54   | -0.28  | -0.60  | 0.27   | 0.54   | 1.55   | 0.43   | 1.35   | 1.94   | 0.55   | 2.54   | 2.74   | 0.53   | 1.30   | 0.24   | 1.58   | 0.87   | 1.46   | 0.01   | 0.89   | 1.47   | 1.10   | 0.50   | 0.12   |      |
| 0.02   | -0.08  | 1.30   | 2.39   | 1.16   | -0.88  | -0.03  | 0.09   | 0.01   | -0.48  | -0.02  | -1.14  | 0.34   | 0.32   | -0.18  | 2.24   | 1.06   | 0.61   | 0.30   | 0.03   | 0.57   | 0.13   | -0.51  | -0.58  | -1.20  | 0.30   | 1.02   | -0.01  |      |
| 0.83   | 2.73   | 2.95   | 1.55   | 2.72   | -0.09  | 0.37   | 2.15   | 0.48   | 0.41   | 0.98   | 1.25   | 2.45   | 1.61   | 3.16   | 1.60   | 0.11   | 1.83   | 2.78   | 1.66   | 2.39   | 0.59   | 1.24   | 0.15   | -0.99  | 2.06   | 2.48   | 0.14   |      |
| 2.52   | 2.29   | 3.25   | 3.10   | 4.71   | -1.81  | -1.80  | -0.06  | 2.20   | 2.52   | 1.07   | 0.61   | 1.48   | 1.85   | 1.77   | 0.99   | 1.96   | 0.02   | 0.83   | 0.33   | -0.64  | 1.17   | 1.33   | 1.40   | -3.38  | 0.95   | 1.98   | 1.40   |      |
| 2.95   | 2.15   | 2.49   | 3.39   | 2.78   | 0.88   | 1.53   | 1.48   | 1.30   | 1.39   | 2.01   | 2.28   | 1.32   | 1.85   | 3.68   | 3.13   | 2.41   | 2.07   | 2.51   | 2.48   | 1.83   | 1.68   | 1.33   | 0.41   | 0.89   | 0.49   | 1.50   | 0.52   |      |
| 6.85   | 5.20   | 4.42   | 4.66   | 5.78   | 4.61   | 3.31   | 5.46   | 2.86   | 5.68   | 4.56   | 3.47   | 5.35   | 3.58   | 5.35   | 4.74   | 5.05   | 4.89   | 3.82   | 5.88   | 3.36   | 3.67   | 4.57   | 3.96   | 5.19   | 2.99   | 3.69   | 2.96   |      |
| 2.22   | 1.66   | 1.58   | 2.34   | 2.37   | 1.34   | 1.02   | 5.52   | 0.54   | 2.37   | 1.80   | 1.02   | 2.42   | 5.34   | 1.94   | 2.54   | 3.86   | 3.86   | 1.40   | 2.40   | 2.41   | 2.30   | 2.12   | 3.06   | 1.80   | 3.39   | 1.73   | 2.70   |      |
| 2.20   | 2.49   | 2.19   | 2.11   | 1.93   | 1.28   | 1.58   | 1.56   | 1.65   | 1.63   | 1.34   | 0.91   | 1.08   | 1.89   | 2.97   | 1.55   | 3.49   | 2.91   | 3.44   | 2.60   | 1.90   | 1.96   | 1.60   | 1.37   | 1.43   | 2.70   | 1.41   | 1.26   |      |
| 2.17   | 1.56   | 2.18   | 2.68   | 3.42   | 1.42   | 0.00   | 0.66   | 1.11   | 1.83   | 1.29   | -1.01  | 1.40   | 1.21   | 2.08   | 1.49   | 1.64   | 1.14   | 4.17   | 0.61   | 0.99   | 0.79   | 2.68   | 2.55   | 2.68   | 1.34   | 5.50   | 1.51   |      |
| 0.55   | 0.26   | 0.01   | -0.46  | 0.41   | 0.53   | -0.41  | -1.81  | -1.07  | -0.97  | -1.24  | -0.31  | 0.65   | -0.27  | 0.77   | -0.91  | -2.89  | 0.84   | -1.04  | 0.31   | -3.42  | 0.32   | -1.03  | -1.59  | -4.07  | -0.22  | 0.06   | -2.73  |      |
| -2.15  | -1.49  | -2.81  | -2.13  | -0.43  | -3.00  | -4.41  | -0.83  | -3.34  | -3.79  | -2.35  | -4.23  | -2.31  | -1.01  | -0.04  | -1.02  | -3.63  | 1.20   | 1.77   | -1.08  | -1.89  | -1.10  | -0.22  | -0.21  | -0.19  | 1.13   | 0.44   | -1.06  |      |
| 2.07   | 3.19   | 3.63   | 3.14   | 3.25   | 2.19   | 1.52   | 2.67   | 2.92   | 3.30   | 3.78   | 1.47   | 3.23   | 3.21   | 3.50   | 3.50   | 3.72   | 3.52   | 3.34   | 3.59   | 2.25   | 1.08   | 3.74   | 5.90   | 1.85   | 1.98   | 1.25   | 2.66   |      |
| -1.18  | -2.79  | -2.50  | -3.54  | -1.91  | -7.93  | 9.39   | -5.92  | -3.69  | -2.39  | -8.26  | -5.48  | -8.18  | -0.60  | 0.42   | -1.01  | -1.86  | 2.95   | -0.98  | 0.16   | -1.50  | -0.68  | -1.77  | -0.52  | -2.57  | -0.39  | 2.26   | -0.82  |      |
| 2.39   | 3.52   | 3.43   | 2.14   | 2.65   | 4.28   | 4.40   | 4.36   | 1.83   | 1.75   | 3.97   | 2.45   | 3.81   | 1.70   | 1.18   | 2.01   | 4.24   | 3.47   | 3.19   | 2.59   | 1.54   | 1.36   | 1.77   | 1.12   | 4.37   | 2.87   | 2.85   | 2.61   |      |
| 1.38   | 1.44   | 1.79   | 1.20   | 3.44   | 1.90   | -0.21  | 1.24   | 2.50   | 1.20   | 0.08   | 2.01   | 1.75   | 1.52   | -0.20  | -0.08  | 0.43   | 1.39   | 0.17   | -0.05  | -0.88  | 0.07   | 0.39   | -0.43  | -0.79  | 0.99   | 0.27   | -0.41  |      |
| 4.82   | 2.63   | 2.83   | 5.01   | 0.84   | 1.76   | 1.38   | 1.52   | 3.60   | 4.18   | 2.30   | 6.77   | 1.96   | -1.67  | 1.46   | -5.07  | -6.65  | -4.21  | -0.32  | -6.49  | -3.95  | 1.85   | -3.65  | -10.28 | -11.90 | -6.95  | -5.13  | -5.67  |      |
| 4.71   | 2.19   | 3.04   | 5.93   | 2.93   | 2.50   | 3.98   | 2.07   | 4.81   | 4.72   | 1.29   | 7.04   | 1.93   | -1.03  | 3.45   | -4.68  | -9.26  | -4.84  | -2.88  | -6.43  | -1.31  | 2.75   | -1.99  | -10.89 | -10.09 | -4.54  | -5.61  | -5.95  |      |
| -13.48 | -11.78 | -11.61 | -11.57 | -8.52  | -3.76  | -6.13  | -5.31  | -17.70 | -16.03 | -7.67  | -20.06 | -8.83  | -7.59  | -0.70  | -7.90  | -11.18 | -12.85 | -6.47  | -13.58 | -8.58  | -3.26  | -8.84  | -17.72 | -20.95 | -14.83 | -10.40 | -11.09 |      |
| 0.17   | -0.65  | -1.94  | -0.13  | 0.32   | 0.06   | -1.21  | 0.44   | -4.83  | -2.04  | 0.15   | -4.07  | -0.20  | 3.26   | 4.88   | 1.68   | 3.13   | 2.50   | 4.07   | 3.11   | 0.83   | 2.25   | 1.33   | 3.95   | 3.03   | 2.29   | 1.78   | 1.68   |      |
| -2.30  | -3.23  | -3.91  | -1.78  | -0.65  | 0.52   | -1.80  | 0.86   | -5.56  | -3.29  | -1.18  | -6.94  | -0.35  | 3.70   | 3.72   | 2.80   | 4.56   | 2.35   | 4.06   | 3.75   | 4.07   | 3.16   | 3.39   | 5.53   | 4.72   | 3.08   | 4.16   | 3.56   |      |
| 3.04   | 2.54   | 1.20   | 1.28   | 3.05   | 3.08   | 0.63   | 3.14   | 3.62   | 2.05   | 1.71   | 0.67   | 1.47   | 1.70   | 3.10   | 2.55   | 2.72   | 1.89   | 1.83   | 3.05   | 2.34   | 0.41   | 0.35   | -2.14  | -2.89  | -0.11  | 3.17   | -4.89  |      |
| -13.96 | -15.74 | -19.57 | -17.22 | -16.70 | -10.41 | -10.04 | -13.39 | -14.52 | -16.66 | -13.73 | -16.69 | -15.05 | -12.49 | -14.63 | -16.14 | -17.33 | -17.51 | -16.76 | -18.36 | -12.92 | -13.49 | -16.77 | -14.60 | -13.14 | -16.51 | -16.51 | -17.09 |      |
| 1.57   | 1.37   | 2.58   | 2.71   | 1.96   | 0.80   | 1.03   | 1.27   | 0.63   | 1.68   | 1.79   | 1.59   | 2.91   | 1.08   | 1.34   | 1.62   | 0.73   | 2.13   | 1.84   | 2.75   | 2.97   | 1.52   | 1.70   | 0.62   | 0.29   | 1.78   | 1.23   | 1.47   |      |
| 3.29   | 0.00   | 2.16   | 3.86   | 3.53   | 0.94   | 1.25   | 3.48   | -0.72  | 1.97   | 0.16   | 1.35   | 1.52   | 3.33   | 1.89   | 1.57   | 2.63   | 3.30   | 1.49   | 1.66   | 2.30   | 2.61   | -0.05  | 1.21   | 4.93   | 0.41   | 1.60   | 2.50   |      |
| -1.21  | 1.26   | 0.77   | -0.57  | 1.21   | -0.06  | -0.05  | 0.89   | -0.88  | -0.48  | 1.21   | -1.59  | -0.33  | -1.11  | -0.80  | -0.61  | -0.28  | 1.31   | -1.61  | 1.79   | -0.38  | 0.17   | 0.23   | 0.61   | 0.06   | -0.23  | -0.32  | -0.26  |      |
| -0.15  | 0.20   | 0.64   | -0.08  | 0.47   | -0.06  | -0.57  | -0.40  | -1.05  | -0.05  | -0.76  | -0.77  | -0.12  | -1.08  | -0.49  | -1.78  | -0.67  | -0.83  | 0.20   | -0.80  | -1.22  | -0.51  | -1.11  | -1.00  | -0.99  | 0.40   | -1.10  | -0.29  |      |
| 2.10   | 1.52   | 1.49   | 3.43   | 2.20   | 0.59   | 0.94   | 2.16   | 2.14   | 1.06   | 2.17   | 1.72   | 0.62   | 2.00   | 2.03   | 3.01   | 2.59   | 2.43   | 2.20   | 2.21   | -0.38  | 2.15   | 1.76   | 3.25   | 1.52   | 0.03   | 0.12   | 0.19   |      |
| -4.83  | 1.12   | -7.63  | -2.39  | -2.23  | -2.99  | -2.28  | 0.59   | -5.82  | -3.63  | -6.27  | -7.78  | -5.72  | -7.66  | -8.52  | -16.06 | 12.05  | 3.97   | 3.50   | -7.89  | -19.34 | -15.97 | -7.66  | 2.18   | 4.54   | -13.52 | -15.06 | 0.32   |      |
| -8.72  | 1.79   | -12.73 | -5.97  | -4.55  | -4.06  | -3.65  | -0.91  | -6.71  | -4.84  | -5.88  | -11.79 | -4.36  | -16.49 | -17.66 | -21.34 | 3.69   | 4.37   | -6.09  | -13.19 | -25.08 | -22.37 | -16.56 | -5.45  | 0.75   | -17.00 | -18.74 | -6.40  |      |
| -15.25 | -1.08  | -21.59 | -8.96  | -10.86 | -5.52  | -7.05  | 1.11   | -11.83 | -9.70  | -10.35 | -17.78 | -5.00  | -23.65 | -27.02 | -27.81 | -5.39  | 3.56   | -9.54  | -21.49 | -35.80 | -33.82 | -21.40 | -14.42 | -6.96  | -20.78 | -23.91 | -18.47 |      |
| 5.58   | 5.54   | 8.95   | 7.54   | 6.10   | 8.14   | 10.53  | 5.37   | 6.11   | 5.26   | 8.22   | 8.51   | 7.77   | -0.92  | 4.12   | -0.97  | -5.70  | -3.13  | -1.69  | -4.62  | -35.80 | -33.82 | -21.40 | -14.42 | -6.96  | -20.78 | -23.91 | -18.47 |      |
| 7.34   | 5.30   | 8.59   | 7.49   | 4.73   | 10.12  | 12.45  | 8.39   | 5.56   | 4.89   | 7.76   | 9.55   | 7.13   | -2.18  | 3.71   | -1.20  | -9.67  | -6.41  | -4.38  | -8.80  | -1.28  | 3.00   | -4.73  | -9.88  | -10.65 | -8.97  | -6.04  | -10.30 |      |
| -19.40 | -22.76 | -22.35 | -22.37 | -17.96 | -22.74 | -27.99 | -20.61 | -22.76 | -22.64 | -21.41 | -2     |        |        |        |        |        |        |        |        |        |        |        |        |        |        |        |        |      |

|        |        |        |        |        |        |        |        |        |        |        |        |        |        |        |        |        |        |        |        |        |        |        |        |        |        |        |        |
|--------|--------|--------|--------|--------|--------|--------|--------|--------|--------|--------|--------|--------|--------|--------|--------|--------|--------|--------|--------|--------|--------|--------|--------|--------|--------|--------|--------|
| 1.03   | 1.37   | 0.52   | 0.17   | 1.08   | 0.90   | -0.72  | 2.11   | -1.87  | 0.72   | 1.48   | -1.26  | 1.04   | -2.01  | -2.27  | -2.03  | -2.10  | -2.69  | -4.03  | -2.00  | -2.75  | -3.18  | -3.40  | -6.07  | -1.65  | -2.24  | -1.88  | -3.25  |
| 1.37   | 3.03   | 2.44   | 0.63   | 1.47   | 1.47   | 1.47   | 0.63   | 0.03   | 1.87   | 1.49   | 0.30   | 1.47   | -0.38  | -0.89  | -0.35  | -0.21  | -0.43  | -0.83  | 0.08   | -1.19  | -1.58  | -1.85  | -3.70  | -0.38  | -0.42  | -1.46  | -1.00  |
| 3.50   | 3.68   | 1.79   | 1.18   | 1.06   | 1.17   | 1.02   | 2.04   | 1.95   | 1.55   | 2.11   | -0.19  | -1.25  | 1.43   | 1.94   | 0.68   | 0.05   | 1.26   | -0.93  | 0.42   | -1.43  | 0.99   | 0.00   | -1.39  | 0.72   | 1.91   | 0.77   | -1.94  |
| 4.84   | 5.53   | 5.19   | 4.06   | 5.86   | 3.18   | 3.29   | 2.68   | 2.32   | 2.74   | 3.10   | 3.38   | 2.44   | 4.72   | 5.97   | 3.79   | 3.55   | 6.48   | 4.22   | 4.68   | 3.23   | 3.63   | 2.83   | 4.92   | 3.05   | 3.79   | 3.57   | 2.83   |
| -0.94  | -0.98  | -0.01  | -0.11  | 0.09   | -1.21  | -2.46  | -0.56  | -0.19  | -1.53  | -2.04  | -1.60  | -1.45  | 1.83   | 1.42   | 1.87   | 4.12   | 4.15   | 1.98   | 1.31   | 2.79   | 2.01   | 2.39   | 4.20   | 5.31   | 3.54   | 2.83   | 2.99   |
| 2.54   | 3.88   | 1.62   | 2.90   | 4.43   | 2.60   | 2.01   | 3.10   | 1.61   | 3.14   | 3.74   | 1.82   | 1.94   | 2.29   | 3.53   | 4.73   | 1.17   | 4.39   | 2.33   | 2.25   | 2.77   | 2.14   | 1.93   | 1.43   | 1.43   | 4.09   | 2.89   | 1.89   |
| 31.95  | 28.35  | 25.01  | 29.57  | 22.81  | 19.41  | 20.97  | 16.29  | 22.03  | 27.66  | 19.11  | 25.12  | 19.19  | 7.09   | 10.92  | 6.55   | 1.80   | 7.20   | 8.18   | 6.53   | 4.37   | 12.17  | 2.72   | -2.06  | 2.61   | 3.79   | 7.56   | 4.17   |
| 46.94  | 46.47  | 43.68  | 46.05  | 38.99  | 35.96  | 36.93  | 31.23  | 41.14  | 46.63  | 34.31  | 43.19  | 36.51  | 11.80  | 16.40  | 11.88  | 8.23   | 8.55   | 9.38   | 9.96   | 7.63   | 18.21  | 8.02   | -12.02 | -4.88  | 0.43   | 9.60   | -0.02  |
| -17.83 | -17.28 | -13.75 | -17.63 | -13.34 | -14.25 | -13.74 | -12.95 | -16.49 | -22.20 | -14.94 | -16.77 | -15.10 | -8.93  | -3.62  | -7.58  | -8.91  | -9.97  | -8.31  | -8.86  | -7.51  | -8.31  | -10.92 | -15.14 | -10.13 | -10.35 | -10.86 | -11.05 |
| 5.12   | 1.55   | 3.67   | 4.43   | 2.23   | 1.96   | 3.37   | 2.96   | 2.77   | 4.17   | 3.30   | 2.98   | 3.85   | 1.03   | 3.22   | -1.01  | -10.37 | -1.44  | 0.73   | -4.49  | 0.90   | 3.64   | -4.41  | -3.86  | -13.23 | -5.79  | -1.89  | -7.33  |
| 7.12   | 3.83   | 6.32   | 6.81   | 3.69   | 4.29   | 5.96   | 3.95   | 5.66   | 8.01   | 7.10   | 7.58   | 6.49   | 1.32   | 3.30   | -0.48  | -10.39 | -1.99  | -0.37  | -5.81  | 1.37   | 3.96   | -6.00  | -6.12  | -12.79 | -6.64  | -3.22  | -9.82  |
| -12.03 | -16.74 | -12.46 | -11.65 | -7.34  | -7.75  | -10.75 | -7.96  | -16.04 | -18.52 | -14.48 | -16.52 | -12.44 | -4.10  | 0.50   | -4.38  | -9.97  | -7.12  | -4.35  | -7.19  | -4.49  | -0.02  | -8.50  | -9.37  | -15.10 | -9.63  | -6.86  | -10.39 |
| 0.14   | 1.87   | 1.91   | 2.36   | 1.13   | 0.11   | -0.24  | 0.27   | 0.28   | 0.03   | 0.96   | -0.09  | 2.19   | 1.25   | 2.78   | 2.22   | 1.21   | 0.90   | 0.60   | 2.24   | 0.57   | 2.35   | 0.09   | 0.86   | 2.60   | 0.73   | 0.02   | 0.99   |
| -0.05  | -0.19  | 2.08   | 2.22   | 1.17   | -0.47  | 0.13   | -0.12  | -0.20  | -0.86  | -1.18  | -0.10  | 0.22   | -0.55  | -0.06  | 0.49   | 1.86   | 0.80   | 0.40   | -0.02  | 0.38   | 0.23   | -0.33  | -0.18  | -1.81  | 0.42   | -0.09  | 0.48   |
| 2.06   | 3.03   | 3.40   | 1.62   | 2.31   | 0.12   | 0.70   | 2.02   | 0.08   | 0.72   | 1.25   | 0.42   | 2.80   | 1.02   | 3.57   | 1.84   | -0.13  | 0.66   | 2.00   | 1.54   | 1.61   | 0.75   | 1.46   | 1.52   | 0.90   | 1.43   | 1.99   | 0.70   |
| 2.42   | 3.37   | 3.71   | 3.19   | 5.16   | -2.11  | -2.58  | -1.73  | 2.39   | 2.14   | -0.20  | 0.36   | 1.42   | 1.26   | 1.32   | 1.12   | 0.12   | -0.08  | 1.03   | 0.49   | -1.82  | 2.05   | 0.86   | 0.99   | -3.85  | 0.41   | 1.96   | 1.96   |
| 2.89   | 2.76   | 2.54   | 3.60   | 2.81   | 1.34   | 1.06   | 1.43   | 1.57   | 2.14   | 1.43   | 1.94   | 1.75   | 1.97   | 3.22   | 3.09   | 2.76   | 1.35   | 2.63   | 2.55   | 1.92   | 1.10   | 1.69   | 0.26   | 0.97   | 1.34   | 1.54   | 0.86   |
| 7.53   | 5.63   | 4.47   | 6.83   | 6.93   | 4.09   | 3.56   | 6.14   | 2.96   | 5.33   | 4.77   | 4.14   | 5.74   | 6.70   | 8.56   | 5.38   | 4.08   | 5.86   | 3.74   | 6.49   | 3.35   | 4.36   | 3.91   | 4.40   | 3.98   | 1.86   | 3.61   | 3.12   |
| 2.26   | 1.50   | 1.67   | 2.24   | 2.39   | 2.44   | 0.46   | 0.76   | 1.42   | 1.96   | 1.38   | 0.77   | 2.05   | 2.59   | 3.43   | 2.18   | 3.77   | 3.37   | 1.77   | 2.32   | 2.24   | 2.39   | 2.05   | 3.41   | 2.69   | 3.05   | 2.18   | 3.00   |
| 2.65   | 2.57   | 2.32   | 2.02   | 2.21   | 0.75   | 1.18   | 1.80   | 1.07   | 1.61   | 1.96   | 1.04   | 1.14   | 2.57   | 2.14   | 2.14   | 3.66   | 3.56   | 3.77   | 1.70   | 1.64   | 2.73   | 2.29   | 1.15   | 2.11   | 2.95   | 2.03   | 1.71   |
| 1.83   | 1.41   | 1.71   | 2.06   | 2.69   | 1.73   | -0.73  | 0.50   | 0.99   | 1.60   | -0.80  | 0.74   | 0.73   | 2.79   | 2.28   | 1.36   | 0.98   | 1.47   | 2.95   | 2.77   | 1.92   | 1.20   | 1.90   | 2.00   | 2.25   | 1.10   | 0.74   | 2.30   |
| -1.06  | 0.67   | -0.14  | -0.07  | 0.94   | 0.03   | -0.78  | 0.77   | -0.33  | -2.69  | -2.01  | -0.56  | 0.70   | 0.66   | 0.78   | -0.89  | -2.43  | 1.15   | -1.04  | 0.36   | -2.70  | 1.46   | -1.34  | -3.47  | -3.89  | 0.00   | -1.43  | -2.38  |
| -3.15  | -3.78  | -3.12  | -4.37  | -2.37  | -3.23  | -4.89  | -2.09  | -3.63  | -4.12  | -3.00  | -4.38  | -3.74  | -0.60  | -0.43  | -1.75  | -3.45  | 1.55   | 0.73   | -1.66  | -1.31  | -0.21  | -0.83  | 0.96   | 0.41   | 0.83   | 1.15   | -1.19  |
| 2.87   | 4.74   | 3.70   | 4.08   | 2.63   | 3.00   | 1.98   | 2.81   | 3.16   | 2.75   | 3.57   | 2.95   | 3.22   | 3.15   | 3.00   | 4.41   | 3.09   | 3.73   | 5.63   | 0.84   | 2.65   | 3.09   | 5.03   | 8.14   | 2.89   | 4.09   | 1.23   | 1.84   |
| -2.82  | -2.97  | -3.42  | -4.02  | -3.59  | -8.83  | -10.60 | -8.03  | -4.12  | -4.59  | -9.51  | -5.22  | -10.10 | -0.82  | -0.78  | -0.48  | -0.74  | 2.32   | -0.53  | 0.18   | -1.64  | -0.26  | -1.49  | -2.22  | -0.87  | -0.30  | -2.14  | -1.23  |
| 3.00   | 3.27   | 3.78   | 2.97   | 3.14   | 4.61   | 4.70   | 5.27   | 2.16   | 1.70   | 4.32   | 3.07   | 4.48   | 1.10   | 2.03   | 2.48   | 5.46   | 3.83   | 3.94   | 3.14   | 0.65   | 1.37   | 2.26   | 0.81   | 4.15   | 2.69   | 3.39   | 3.00   |
| 1.10   | 1.93   | 3.02   | 1.20   | 2.27   | 3.31   | 0.11   | 1.33   | 2.58   | 1.51   | 1.40   | 0.54   | 1.68   | -0.77  | -0.39  | -0.49  | -0.39  | 0.61   | 1.01   | 0.89   | 0.79   | 1.68   | 0.76   | -3.51  | -0.56  | 0.46   | -0.21  | 0.19   |
| 8.12   | 4.18   | 4.82   | 7.36   | 3.23   | 3.32   | 4.18   | 2.79   | 7.14   | 6.67   | 4.11   | 9.03   | 4.97   | -1.01  | 1.73   | -4.14  | -7.59  | -3.26  | -1.69  | -6.74  | -4.23  | 1.73   | -3.83  | -10.23 | -12.58 | -5.89  | -4.63  | -7.13  |
| 7.60   | 4.77   | 6.68   | 8.32   | 3.03   | 4.92   | 5.40   | 3.24   | 7.91   | 8.69   | 4.08   | 10.00  | 6.01   | -0.45  | 3.16   | -5.04  | -11.15 | -2.11  | -1.99  | -6.17  | -1.78  | 2.83   | -1.74  | -9.57  | -10.58 | -5.21  | -5.77  | -8.01  |
| -21.58 | -17.95 | -18.24 | -18.44 | -13.82 | -8.69  | -12.62 | -12.59 | -21.88 | -24.65 | -15.93 | -24.87 | -16.64 | -7.52  | -0.42  | -8.79  | -13.42 | -11.53 | -7.71  | -15.14 | -10.42 | -3.76  | -9.08  | -16.81 | -21.19 | -15.40 | -12.15 | -13.12 |
| -3.87  | -3.99  | -4.38  | -3.92  | -0.73  | -1.31  | -4.22  | 0.07   | -8.19  | -5.50  | -2.99  | -7.73  | -3.23  | 1.91   | 4.69   | 1.02   | 1.86   | 1.59   | 2.34   | 1.89   | 0.59   | 0.85   | 0.12   | 3.34   | 4.13   | 1.52   | 2.12   | 2.73   |
| -6.98  | -6.79  | -9.76  | -6.12  | -4.36  | -1.37  | -7.48  | -1.09  | -11.15 | -8.70  | -3.68  | -13.54 | -4.82  | 3.97   | 2.94   | 2.54   | 4.26   | 2.71   | 3.89   | 4.22   | 3.14   | 3.30   | 4.21   | 4.89   | 4.25   | 2.89   | 3.72   | 4.58   |
| 3.19   | 2.93   | 0.35   | 0.53   | 2.61   | 3.20   | 0.12   | 2.54   | 2.09   | -0.37  | 2.15   | 0.90   | 1.52   | 0.60   | 2.35   | 1.26   | -1.30  | 2.03   | 1.81   | 5.36   | 3.10   | 1.72   | 0.04   | -2.20  | -0.57  | -0.65  | 3.79   | -3.81  |
| -15.89 | -18.08 | -20.63 | -18.10 | -20.26 | -11.09 | -11.53 | -15.37 | -16.10 | -18.41 | -14.85 | -17.77 | -11.22 | -13.49 | -15.88 | -17.55 | -18.10 | -20.18 | -19.28 | -19.22 | -13.61 | -14.77 | -18.91 | -16.71 | -15.26 | -18.64 | -18.23 | -19.52 |
| 2.25   | 1.32   | 2.20   | 2.79   | 2.66   | 1.01   | 1.08   | 1.34   | 0.66   | 1.28   | 1.27   | 2.11   | 2.21   | 1.41   | 1.64   | 2.62   | 0.31   | 2.61   | 2.30   | 2.69   | 2.30   | 1.06   | 1.47   | 1.33   | 1.56   | 1.72   | 1.72   | 2.03   |
| 5.23   | 1.99   | 2.70   | 4.58   | 4.40   | 1.05   | 2.95   | 3.05   | 0.44   | 2.54   | 0.57   | 0.45   | 0.94   | 1.72   | 2.40   | 2.01   | 3.55   | 4.79   | 2.89   | 1.31   | 2.69   | 3.21   | 0.29   | 1.32   | 3.70   | 1.40   | 0.82   | 1.94   |
| -1.59  | 1.68   | 1.47   | 0.48   | 0.09   | -0.07  | -0.01  | 0.30   | -0.82  | -0.67  | -0.60  | -1.19  | -0.05  | -0.34  | -1.22  | -0.68  | -0.37  | 0.70   | -1.26  | 0.13   | -0.34  | -0.12  | 0.08   | 0.63   | -0.88  | -0.91  | 0.65   | -0.83  |
| 0.46   | -0.02  | 0.72   | -0.65  | 0.82   | 0.92   | -0.76  | -0.13  | -0.90  | -0.08  | 0.31   | -0.52  | 0.23   | -0.68  | -0.23  | -1.78  | 1.25   | -0.20  | -0.30  | -1.00  | -0.86  | -0.67  | -0.76  | -1.79  | -0.93  | -0.59  | -1.19  | -0.25  |
| 2.97   | 1.91   | 1.44   | 3.17   | 2.06   | -0.71  | 0.24   | 1.77   | 1.56   | -0.06  | 1.14   | 3.03   | 0.89   | 1.21   | 1.49   | -0.56  | 2.91   | 0.27   | 1.81   | 1.77   | -0.23  | 2.23   | 1.41   | 3.81   | 2.90   | 0.31   | -0.44  | 0.81   |
| -9.02  | 3.01   | -4.21  | -2.24  | -7.95  | -1.34  | -1.50  | -1.05  | -5.39  | -4.15  | -2.87  | -7.04  | -3.52  | -11.95 | -12.39 | -17.85 | 10.67  | 6.63   | -5.37  | -11.24 | -23.67 | -18.74 | -11.90 | -9.42  | -1.04  | -15.72 | -11.89 | -0.41  |
| -6.48  | 2.17   | -6.96  | -5.48  | -10.99 | -4.22  | -3.43  | -0.56  | -6.66  | -5.68  | -3.80  | -10.57 | -9.91  | -19.79 | -21.64 | -25.60 | 1.45   | 7.41   | -8.75  | -17.74 | -29.93 | -27.72 | -19.15 | -8.72  | -4.74  | -20.66 | -18.58 | -10.72 |
| -16.14 | -1.15  | -11.89 | -7.25  | -18.99 | -5.12  | -6.83  | 1.20   | -14.73 | -8.84  | -6.81  | -16.85 | -1.83  | -30.55 | -31.60 | -33.26 | -10.88 | 0.88   | -13.48 | -28.55 | -40.36 | -39.51 | -26.96 | -19.01 | -12.27 | -25.37 | -27.30 | -22.97 |
| 8.70   | 7.97   | 10.73  | 10.57  | 9.17   | 10.86  | 11.47  | 6.43   | 7.82   | 6.69   | 10.23  | 9.48   | 9.91   | -0.06  | 3.63   | -4.09  | -6.65  | -3.91  | -1.46  | -4.62  | -0.55  | 3.41   | -2.42  | -9.92  | -9.70  | -6.08  | -3.52  | -8.99  |
| 10.39  | 7.46   | 10.94  | 10.49  | 7.39   | 13.30  | 14.06  | 8.95   | 6.93   | 6.96   | 9.79   | 11.76  | 11.80  | -2.98  | 3.36   | -2.36  | -10.93 | -6.30  | -3.86  | -9.18  | -0.86  | 3.25   | -4.31  | -11.37 | -10.97 | -9.19  | -5.19  | -11.27 |
| -25.52 | -22.51 | -27.64 | -29.07 | -24.57 | -25.37 | -29.81 | -22.16 | -25.61 | -27.51 | -24.21 | -25.85 | -26.86 | -8.43  | -10.57 | -9.41  | -6.86  | -10.08 | -8.85  | -9.37  | -9.91  | -10.90 | -9.68  | -13.82 | -11.27 | -11.59 | -12.92 | -12.94 |
| 4.32   | 4.22   | 5.70   | 4.72   | 7.40   | 1.26   | 3.14   | 2.02   | 2.56   | 1.25   | 1.83   | 2.98   | 1.38   | 0.66   | 2.01   | 0.25   | -2.54  | 1.26   | 1.03   | -2.41  | -1.51  | 0.63   | -0.29  | -0.78  | -0.18  | -0.57  | 0.41   | -1.29  |
| 30.01  | 24.88  | 27.85  | 30.27  | 17.08  | 15.93  | 25.47  | 16.83  | 34.32  | 30.27  | 23.70  | 41.77  | 25.46  | 4.72   | 2.33   | -2.50  | -8.24  | 1.73   | 5.81   | -2.68  | 3.45   | 5.57   | -1.29  | -5.37  | -3.36  | 8.19   | -1.19  | -12.15 |
| -0.18  | -0.48  | 4.11   | 2.57   | 3.86   |        |        |        |        |        |        |        |        |        |        |        |        |        |        |        |        |        |        |        |        |        |        |        |



|        |        |        |        |        |        |        |        |        |        |        |        |        |        |        |        |        |        |        |        |        |        |        |        |        |        |        |        |
|--------|--------|--------|--------|--------|--------|--------|--------|--------|--------|--------|--------|--------|--------|--------|--------|--------|--------|--------|--------|--------|--------|--------|--------|--------|--------|--------|--------|
| 4.86   | 5.66   | 6.00   | 4.08   | 6.36   | 3.35   | 2.93   | 2.03   | 3.16   | 3.67   | 3.48   | 2.83   | 3.39   | 5.16   | 5.94   | 4.58   | 3.85   | 5.24   | 3.97   | 4.90   | 3.43   | 3.78   | 2.99   | 6.14   | 2.30   | 4.06   | 3.68   | 3.15   |
| -0.66  | -0.14  | 1.07   | 0.83   | -0.31  | -1.26  | -1.47  | 0.22   | 0.37   | -0.97  | -0.60  | -0.15  | -1.39  | 2.72   | 2.36   | 2.00   | 4.93   | 3.13   | 2.54   | 2.08   | 2.78   | 1.55   | 2.25   | 3.74   | 5.68   | 3.58   | 3.07   | 3.30   |
| 3.24   | 4.74   | 3.61   | 2.71   | 4.67   | 2.82   | 2.44   | 3.38   | 2.63   | 2.56   | 4.72   | 1.17   | 2.30   | 3.62   | 3.74   | 3.39   | 1.41   | 2.42   | 2.45   | 3.67   | 2.71   | 2.24   | 2.52   | 2.40   | 3.59   | 3.21   | 3.14   | 1.19   |
| 33.57  | 25.77  | 25.56  | 29.01  | 28.45  | 18.09  | 17.77  | 15.26  | 20.14  | 23.98  | 16.06  | 22.37  | 18.84  | 6.94   | 11.59  | 6.71   | 0.49   | 7.59   | 8.23   | 7.47   | 5.27   | 13.69  | 3.74   | -1.30  | 4.88   | 2.46   | 8.23   | 4.54   |
| 50.59  | 44.24  | 41.82  | 45.11  | 47.61  | 33.51  | 30.54  | 27.76  | 35.19  | 38.61  | 27.81  | 35.45  | 34.03  | 11.88  | 16.62  | 12.32  | 1.57   | 9.61   | 9.99   | 10.80  | 9.97   | 19.68  | 2.17   | -11.99 | -5.19  | 2.14   | 7.48   | -0.14  |
| -18.32 | -14.60 | -14.03 | -17.08 | -15.94 | -12.57 | -10.21 | -11.88 | -13.88 | -17.58 | -12.23 | -13.08 | -12.82 | -8.54  | -3.30  | -7.77  | -8.30  | -9.97  | -8.76  | -10.30 | -7.94  | -8.94  | -11.53 | -16.55 | -10.90 | -11.83 | -8.82  | -11.14 |
| 5.86   | 2.93   | 5.24   | 5.29   | 2.09   | 2.53   | 3.12   | 3.08   | 3.97   | 3.16   | 3.74   | 2.90   | 4.86   | 0.84   | 4.60   | -1.39  | -11.13 | -1.34  | 0.51   | -5.27  | 0.83   | 3.06   | -4.37  | -5.07  | -14.45 | -4.92  | -1.96  | -6.87  |
| 9.35   | 5.36   | 7.43   | 7.70   | 6.27   | 5.77   | 5.68   | 5.59   | 5.80   | 8.19   | 7.12   | 6.93   | 8.48   | 1.53   | 3.82   | -0.45  | -11.81 | -1.92  | -0.30  | -6.22  | 1.66   | 4.34   | -6.24  | -7.23  | -14.48 | -6.78  | -3.65  | -10.32 |
| -17.14 | -19.76 | -16.08 | -13.73 | -15.41 | -11.59 | -10.52 | -11.44 | -16.06 | -18.19 | -14.95 | -15.08 | -15.94 | -3.11  | 0.57   | -6.85  | -12.40 | -7.39  | -4.29  | -7.60  | -4.69  | -1.12  | -9.67  | -7.91  | -16.27 | -9.11  | -7.55  | -10.39 |
| 0.51   | 2.49   | 3.31   | 2.55   | 0.79   | -0.92  | 0.06   | -0.07  | 0.64   | 0.82   | 0.40   | 0.13   | 2.11   | 0.68   | 3.31   | 2.12   | -0.35  | 1.86   | 0.48   | 1.48   | 0.33   | 1.43   | -0.51  | 1.47   | 0.90   | -0.05  | -0.01  | 0.67   |
| -0.06  | 1.19   | 1.36   | 2.17   | 1.51   | -0.38  | -0.26  | -0.26  | -0.46  | -0.76  | -0.32  | -0.51  | 0.11   | -0.34  | -0.57  | 0.39   | 1.56   | 0.58   | -0.65  | 0.04   | 0.37   | 0.24   | -0.17  | 0.35   | -0.37  | 0.06   | 0.43   | 0.20   |
| 2.75   | 3.23   | 4.17   | 1.78   | 2.71   | -0.07  | 1.38   | 1.40   | 0.78   | 1.52   | 2.13   | -0.67  | 2.49   | 1.67   | 3.68   | 1.73   | -0.65  | 2.86   | 4.13   | 2.36   | 2.67   | 0.44   | 1.83   | 1.12   | 1.19   | 1.12   | 2.21   | 0.99   |
| 2.37   | 4.67   | 3.90   | 3.43   | 5.88   | -2.96  | -2.97  | -1.53  | 2.54   | 2.94   | 0.77   | -0.54  | 1.63   | 0.84   | 0.41   | 0.64   | 1.69   | -0.48  | 1.44   | 2.58   | -0.81  | 1.16   | 1.58   | 1.21   | -3.44  | 0.99   | 1.63   | -0.06  |
| 3.25   | 2.26   | 2.37   | 3.89   | 3.12   | 1.37   | 0.92   | 1.28   | 0.84   | 1.57   | 1.94   | 1.80   | 1.73   | 1.59   | 3.79   | 3.63   | 2.48   | 1.96   | 2.83   | 2.16   | 2.40   | 2.28   | 1.82   | -0.28  | 0.43   | 1.25   | 1.32   | 2.21   |
| 7.34   | 7.46   | 5.73   | 6.50   | 7.84   | 4.14   | 3.08   | 5.29   | 5.28   | 4.75   | 4.70   | 4.81   | 3.58   | 5.97   | 7.10   | 4.61   | 4.45   | 5.23   | 5.35   | 6.72   | 2.43   | 3.69   | 4.08   | -3.56  | 4.61   | 3.34   | 2.61   | 3.02   |
| 2.72   | 1.11   | 1.59   | 2.90   | 1.40   | 1.76   | 1.12   | 0.46   | 0.38   | 2.38   | 1.34   | 0.83   | 1.84   | 2.92   | 3.46   | 3.21   | 4.10   | 4.22   | 1.65   | 3.88   | 2.36   | 3.14   | 2.33   | 4.07   | 1.81   | 3.44   | 1.98   | 3.34   |
| 2.23   | 3.62   | 3.02   | 2.14   | 2.74   | 0.43   | 1.23   | 1.53   | 1.93   | 1.58   | 1.99   | 1.33   | 1.06   | 1.93   | 2.54   | 1.63   | 3.50   | 3.74   | 4.41   | 2.23   | 1.89   | 2.42   | 2.21   | 2.18   | 2.60   | 2.99   | 1.95   | 1.29   |
| 1.99   | 2.33   | 1.78   | 2.33   | 2.77   | 1.33   | -0.34  | 0.02   | 0.09   | 0.49   | -0.44  | 0.23   | 1.42   | 2.78   | 2.99   | 1.52   | 1.63   | 1.44   | 2.85   | 2.25   | 0.79   | 2.64   | 2.42   | 2.05   | 2.35   | 1.37   | 1.13   | 2.04   |
| 0.53   | 0.40   | 0.71   | 0.56   | -0.65  | 0.17   | -0.74  | 0.88   | -0.62  | -1.56  | -1.47  | 0.15   | 0.07   | -0.81  | 0.65   | -1.61  | -1.05  | 0.64   | -0.76  | -0.79  | -2.59  | 0.20   | -1.58  | -1.89  | -6.05  | 0.05   | -0.31  | -3.44  |
| -2.93  | -1.81  | -1.99  | -3.96  | -3.48  | -3.09  | -2.41  | -1.52  | -2.60  | -2.17  | -1.22  | -3.48  | -2.62  | -0.83  | -0.54  | -0.78  | -2.00  | 1.96   | -0.12  | -1.50  | -0.70  | -0.82  | -0.23  | 1.83   | -2.19  | 0.93   | 1.03   | -0.36  |
| 3.21   | 5.31   | 4.52   | 3.90   | 3.10   | 2.56   | 0.77   | 3.46   | 3.58   | 3.17   | 2.36   | 2.34   | 2.31   | 2.50   | 2.08   | 3.79   | 3.45   | 2.67   | 3.85   | 2.23   | 3.07   | 3.15   | 3.43   | 7.59   | 9.96   | 3.14   | 1.41   | 2.44   |
| -2.91  | -2.93  | -2.73  | -4.26  | -4.38  | -8.40  | -9.32  | -6.92  | -4.74  | -3.96  | -6.77  | -4.45  | -9.33  | -0.55  | 0.26   | -1.11  | 0.40   | 2.95   | -0.38  | -0.35  | -2.10  | -0.23  | -1.10  | -3.08  | -0.21  | -0.62  | -2.13  | -0.13  |
| 4.08   | 4.01   | 4.53   | 3.48   | 3.80   | 4.00   | 4.08   | 4.06   | 2.07   | 1.52   | 3.38   | 2.94   | 4.44   | 0.88   | 1.54   | 2.37   | 5.84   | 4.47   | 3.85   | 2.81   | 1.84   | 0.94   | 1.33   | -0.17  | 3.76   | 3.12   | 2.94   | 2.99   |
| 1.01   | 2.00   | 3.08   | 0.86   | 2.20   | 2.26   | 1.17   | 0.25   | 1.43   | 2.12   | 0.63   | 0.54   | 2.17   | -0.60  | 0.17   | -0.89  | -1.91  | 1.10   | 0.52   | -0.45  | -0.27  | 0.98   | 0.22   | -3.50  | -0.32  | 0.03   | 0.88   | 0.02   |
| 11.27  | 7.81   | 7.41   | 9.57   | 5.31   | 4.29   | 4.65   | 4.39   | 6.66   | 7.68   | 5.63   | 9.21   | 7.70   | -2.02  | 2.17   | -4.70  | -7.43  | -2.12  | -0.98  | -7.10  | -4.21  | 3.20   | -3.13  | -10.15 | -12.48 | -5.66  | -5.08  | -6.52  |
| 10.65  | 7.76   | 8.64   | 10.21  | 6.16   | 6.08   | 6.12   | 4.78   | 7.77   | 9.57   | 5.39   | 9.57   | 8.64   | -1.43  | 3.49   | -4.41  | -11.71 | -1.44  | -2.33  | -6.39  | -0.72  | 3.57   | -2.17  | -10.16 | -10.41 | -3.39  | -6.12  | -8.37  |
| -27.58 | -23.41 | -24.49 | -22.13 | -22.90 | -14.83 | -15.88 | -15.42 | -25.28 | -25.94 | -19.20 | -25.30 | -23.49 | -8.62  | -0.92  | -9.86  | -14.20 | -11.97 | -7.97  | -14.80 | -12.09 | -4.46  | -9.32  | -17.40 | -21.40 | -15.39 | -11.33 | -13.64 |
| -7.60  | -5.78  | -8.50  | -6.99  | -5.20  | -2.31  | -5.85  | -1.29  | -8.98  | -7.37  | -4.09  | -8.81  | -5.59  | -1.32  | 4.61   | 0.87   | 1.41   | 1.49   | 0.37   | 2.39   | 0.10   | 1.40   | 0.26   | 4.07   | 2.72   | 1.66   | 1.17   | 2.63   |
| -13.39 | -13.46 | -16.21 | -10.24 | -10.46 | -6.47  | -12.52 | -3.98  | -14.21 | -12.51 | -7.42  | -15.11 | -10.63 | 3.31   | 2.74   | 1.94   | 3.92   | 2.66   | 4.14   | 3.71   | 3.14   | 2.19   | 3.50   | 4.06   | 5.35   | 2.50   | 2.95   | 2.98   |
| 1.18   | 1.32   | 0.01   | 1.08   | 2.95   | 2.82   | 0.40   | 3.36   | 0.68   | -0.27  | 3.55   | 0.68   | 1.14   | 2.99   | 3.55   | 2.48   | -0.96  | 2.44   | 2.50   | 3.68   | 1.63   | 1.79   | 0.32   | -0.88  | -3.58  | -0.33  | 2.83   | -5.96  |
| -17.78 | -19.42 | -22.74 | -20.47 | -20.56 | -12.38 | -13.41 | -16.19 | -17.48 | -20.57 | -17.30 | -19.77 | -18.47 | -15.65 | -16.93 | -20.37 | -22.12 | -22.16 | -20.41 | -20.10 | -14.83 | -18.03 | -19.35 | -18.27 | -17.89 | -19.99 | -19.80 | -22.50 |
| 2.64   | 1.89   | 2.85   | 3.08   | 2.82   | 0.54   | 0.72   | 0.80   | 1.33   | 1.74   | 2.25   | 2.37   | 3.42   | 1.54   | 1.26   | 1.45   | 0.72   | 2.84   | 2.03   | 2.37   | 3.05   | 1.65   | 1.68   | 1.43   | 0.90   | 2.07   | 1.02   | 2.93   |
| 4.50   | 2.07   | 3.61   | 4.92   | 3.93   | 1.45   | 3.84   | 3.82   | 0.36   | 1.75   | 1.63   | 2.15   | 1.10   | 2.50   | 3.37   | 2.00   | 3.69   | 3.66   | 2.77   | 3.94   | 3.47   | 2.83   | 1.43   | 1.45   | -0.20  | 2.63   | 1.97   | 1.59   |
| -0.27  | 1.20   | 0.55   | 0.58   | 0.53   | -0.91  | 0.26   | 0.09   | -0.13  | 0.10   | -0.01  | -1.46  | 0.51   | -0.36  | -1.15  | -1.33  | -0.76  | 0.27   | -1.04  | -1.40  | -0.70  | 1.18   | -0.96  | 0.33   | 1.16   | -0.43  | -0.84  | -1.15  |
| 0.78   | 0.60   | 1.34   | -0.45  | 0.96   | 0.20   | -0.03  | -0.06  | -0.98  | -0.26  | -0.40  | -0.40  | -0.36  | -0.17  | -1.16  | -0.54  | -1.38  | 1.16   | -0.34  | 0.07   | -0.65  | -1.13  | -0.38  | -1.49  | -1.40  | -0.95  | -1.05  | -0.75  |
| 2.72   | 1.85   | 1.48   | 3.72   | 3.22   | 0.37   | 1.88   | 1.76   | 1.43   | 1.21   | 1.72   | 1.78   | 1.10   | 1.28   | 1.89   | -2.26  | 2.62   | 2.85   | 2.34   | 2.66   | -1.00  | 2.49   | 1.84   | 3.33   | 1.05   | 0.33   | 0.15   | 0.92   |
| -5.58  | 2.50   | -8.90  | -4.16  | -10.08 | -3.73  | -1.56  | -0.45  | -6.11  | -2.53  | -3.62  | -7.36  | -1.17  | -14.72 | -15.27 | -21.50 | 4.94   | 5.05   | -6.60  | -14.36 | -29.60 | -23.23 | -14.68 | -3.53  | -2.86  | -1.72  | -16.50 | -2.39  |
| -9.87  | 2.75   | -11.97 | -8.23  | -12.73 | -4.90  | -3.29  | -2.77  | -10.20 | -3.90  | -3.57  | -11.59 | 1.09   | -24.01 | -26.31 | -29.34 | -3.89  | 4.99   | -11.46 | -22.02 | -40.58 | -32.49 | -24.87 | -12.29 | -7.49  | -24.70 | -23.45 | -14.63 |
| -14.81 | -1.98  | -22.29 | -9.59  | -20.40 | -6.92  | -6.78  | 2.70   | -13.38 | -8.81  | -9.94  | -16.17 | 1.15   | -34.57 | -37.94 | -38.59 | -16.92 | -2.58  | -16.61 | -32.70 | -54.66 | -45.21 | -32.40 | -22.58 | -15.23 | -30.13 | -33.62 | -28.11 |
| 9.07   | 7.88   | 10.74  | 8.74   | 10.75  | 9.62   | 8.99   | 4.72   | 6.23   | 5.03   | 7.54   | 6.41   | 9.10   | -0.61  | 3.12   | -3.24  | -6.51  | -4.20  | -1.89  | -4.88  | -0.49  | 3.57   | -1.86  | -7.60  | -8.71  | -6.61  | -3.30  | -8.45  |
| 10.52  | 7.50   | 11.13  | 10.86  | 10.76  | 11.30  | 9.97   | 7.71   | 5.61   | 5.03   | 7.71   | 9.53   | 10.53  | -2.78  | 3.72   | -8.24  | -10.68 | -6.17  | -4.50  | -9.42  | -0.34  | 3.65   | 4.00   | -11.34 | -9.83  | -8.98  | -6.32  | -11.55 |
| -25.42 | -26.76 | -26.71 | -27.33 | -31.45 | -24.27 | -23.69 | -19.98 | -20.88 | -23.09 | -18.56 | -21.90 | -23.52 | -10.46 | -11.27 | -10.61 | -8.34  | -10.92 | -9.17  | -9.54  | -10.11 | -12.25 | -11.14 | -13.19 | -9.90  | -11.80 | -11.71 | -13.31 |
| 4.40   | 5.81   | 7.91   | 4.69   | 5.75   | 1.40   | 5.31   | 2.35   | 3.00   | 1.74   | 2.79   | 5.05   | 2.88   | -0.08  | 0.90   | -1.17  | -2.52  | 2.45   | 0.20   | -2.70  | -1.18  | 1.10   | -0.99  | -1.84  | -0.93  | -1.48  | 0.03   | -2.22  |
| 41.51  | 40.36  | 39.34  | 40.14  | 31.52  | 26.63  | 34.62  | 26.19  | 38.27  | 36.91  | 35.31  | 40.90  | 41.40  | 6.22   | 3.61   | -1.09  | -6.39  | 2.46   | 2.46   | -2.71  | 4.66   | 7.23   | 0.20   | -4.26  | -3.85  | 10.67  | -0.87  | -7.26  |
| -0.30  | -1.04  | 2.49   | 2.68   | 3.29   | 3.45   | -0.99  | 0.40   | 1.96   | 3.11   | -2.06  | 1.30   | -0.49  | -0.15  | 1.53   | -0.23  | -3.31  | -5.26  | 1.05   | -4.33  | 1.86   | 1.93   | 1.01   | -3.28  | -2.04  | 3.49   | 1.46   | -2.11  |
| -4.14  | -3.02  | -3.99  | -1.96  | -5.32  | -2.75  | -1.45  | -1.33  | -4.07  | -1.54  | -0.01  | -2.63  | -3.30  | -0.70  | -0.63  | 2.23   | 3.27   | 1.41   | 1.57   | 2.77   | 1.97   | 4.00   | 0.58   | 3.36   | 3.62   | 2.94   | 1.33   | 4.40   |
| -5.09  | -4.01  | -5.03  | -3.10  | -4.91  | -3.18  | -2.41  | -1.50  | -3.12  | -4.52  | -3.45  | -3.94  | -3.26  | 0.57   | -0.41  | 0.40   | 2.81   | 2.08   | 1.56   | 2.77   | -0.08  | -1.14  | 1.07   | 3.32   | 2.96   | 2.30   | 1.63   | 2.70   |
| -2.46  | -2.10  | -2.19  | -2     |        |        |        |        |        |        |        |        |        |        |        |        |        |        |        |        |        |        |        |        |        |        |        |        |

|        |        |        |        |        |        |        |        |        |        |        |        |        |        |        |        |        |        |        |        |        |        |        |        |        |        |        |        |
|--------|--------|--------|--------|--------|--------|--------|--------|--------|--------|--------|--------|--------|--------|--------|--------|--------|--------|--------|--------|--------|--------|--------|--------|--------|--------|--------|--------|
| 27.00  | 22.57  | 20.61  | 24.59  | 28.35  | 13.99  | 16.61  | 13.80  | 17.28  | 19.14  | 14.31  | 19.17  | 15.42  | 8.57   | 13.03  | 7.91   | 2.40   | 9.49   | 8.76   | 6.90   | 6.86   | 15.35  | 4.12   | -2.17  | 4.01   | 4.35   | 7.70   | 5.29   |
| 40.05  | 36.40  | 35.48  | 38.69  | 46.04  | 27.91  | 26.68  | 25.69  | 31.56  | 30.42  | 24.41  | 31.07  | 26.38  | 13.75  | 17.50  | 12.21  | 2.05   | 10.90  | 11.93  | 10.48  | 11.86  | 22.19  | 3.98   | -10.73 | -2.80  | 3.56   | 9.17   | 0.88   |
| -14.71 | -11.72 | -10.47 | -15.31 | -15.64 | -11.83 | -8.85  | -10.91 | -11.37 | -14.27 | -9.88  | -11.38 | -10.83 | -8.77  | -3.49  | -7.83  | -9.61  | -9.99  | -9.58  | -10.12 | -8.70  | -10.39 | -13.15 | -16.85 | -15.28 | -11.86 | -10.59 | -12.66 |
| 4.57   | 2.07   | 4.27   | 5.19   | 2.98   | 3.03   | 3.20   | 4.03   | 2.59   | 3.14   | 4.23   | 2.31   | 4.86   | 0.84   | 3.68   | -2.14  | -11.63 | -2.08  | 0.92   | -4.77  | 0.74   | 4.33   | -4.00  | -3.41  | -13.66 | -5.25  | -1.48  | -7.21  |
| 8.63   | 5.77   | 8.03   | 7.62   | 8.21   | 5.88   | 6.09   | 5.79   | 6.11   | 7.94   | 7.23   | 6.47   | 8.01   | 1.96   | 3.80   | -0.51  | -12.65 | -1.20  | -0.17  | -5.28  | 1.70   | 4.06   | -6.34  | -6.06  | -13.67 | -6.06  | -3.31  | -10.37 |
| -16.20 | -19.87 | -15.25 | -13.39 | -18.99 | -11.70 | -10.21 | -11.59 | -15.99 | -18.17 | -13.53 | -14.41 | -14.69 | -3.49  | -0.74  | -8.07  | -13.74 | -8.57  | -4.14  | -8.30  | -5.27  | -1.37  | -10.17 | -9.80  | -15.39 | -10.44 | -6.65  | -10.17 |
| 0.37   | 2.00   | 3.57   | 2.60   | 1.32   | -0.55  | 0.41   | 0.39   | 0.68   | 1.24   | 0.14   | 0.26   | 2.51   | 1.44   | 2.75   | 1.79   | 2.07   | 1.82   | 1.07   | 2.73   | -0.32  | 1.72   | -0.18  | 0.81   | 1.96   | 1.13   | 0.52   | 0.82   |
| -0.48  | 0.35   | 1.82   | 2.12   | 0.64   | -1.38  | -0.07  | 0.25   | 0.04   | -0.50  | -0.32  | -0.38  | 0.22   | -0.30  | -0.40  | -0.16  | -0.23  | 1.04   | -0.23  | -0.09  | 0.83   | 0.37   | 0.21   | -0.31  | -2.00  | 0.35   | -0.28  | -0.15  |
| 2.75   | 4.26   | 3.86   | 1.95   | 2.12   | 1.46   | 1.15   | 2.09   | 1.82   | 1.19   | 1.62   | 0.37   | 2.57   | 0.57   | 3.43   | 0.90   | 2.14   | 0.88   | 3.48   | 2.74   | 1.60   | 0.94   | 0.00   | 1.28   | 0.43   | 0.75   | 1.89   | 2.24   |
| 2.92   | 3.21   | 5.06   | 2.83   | 5.42   | -2.97  | -2.76  | -1.63  | 2.23   | 2.69   | 0.22   | -0.63  | 2.10   | 1.43   | 0.92   | 1.30   | 2.50   | -0.78  | 0.90   | 0.75   | 0.09   | 2.41   | 2.32   | 0.86   | -3.77  | 0.58   | 2.36   | 1.62   |
| 2.87   | 2.60   | 2.51   | 4.41   | 3.40   | 1.38   | 1.13   | 1.21   | 1.00   | 1.97   | 2.05   | 2.01   | 1.94   | 1.76   | 3.60   | 3.99   | 1.80   | 1.97   | 2.60   | 2.60   | 1.99   | 1.88   | 1.80   | 0.18   | 1.01   | 1.29   | 1.30   | 1.19   |
| 7.24   | 7.32   | 5.40   | 7.00   | 7.44   | 3.72   | 4.83   | 6.12   | 6.25   | 4.66   | 5.40   | 4.66   | 3.46   | 5.65   | 6.22   | 7.01   | 2.79   | 6.14   | 5.46   | 7.08   | 4.26   | 4.42   | 4.40   | 3.52   | 3.68   | 3.41   | 3.39   | 4.64   |
| 2.00   | 2.49   | 1.92   | 2.90   | 2.46   | 2.02   | 1.35   | 1.35   | 1.37   | 2.77   | 1.68   | 1.01   | 0.80   | 3.08   | 3.32   | 2.81   | 3.26   | 4.11   | 1.84   | 2.50   | 2.29   | 2.62   | 2.68   | 3.55   | 2.26   | 3.32   | 2.11   | 3.73   |
| 2.33   | 2.72   | 2.85   | 2.37   | 2.35   | 0.54   | 1.36   | 1.38   | 2.44   | 2.16   | 2.38   | 1.58   | 1.40   | 2.61   | 2.57   | 2.26   | 3.29   | 3.90   | 3.86   | 2.59   | 1.88   | 3.04   | 2.04   | 1.63   | 2.69   | 2.60   | 1.99   | 1.63   |
| 2.11   | 1.65   | 2.47   | 2.50   | 2.99   | 0.92   | 0.02   | 0.78   | 1.10   | 2.48   | 1.00   | -0.49  | 1.72   | 1.60   | 3.06   | 1.23   | 0.64   | 1.47   | 2.93   | 2.37   | 1.70   | 0.68   | 2.91   | 3.18   | 2.03   | 3.27   | 1.85   | 2.22   |
| 1.47   | 0.73   | 1.87   | 0.89   | 0.92   | 0.34   | -0.40  | 0.79   | 0.26   | -1.00  | -0.27  | -0.85  | 0.46   | -0.99  | 0.43   | -1.77  | -0.84  | 1.77   | -1.29  | -0.71  | -2.10  | 0.30   | -1.57  | -0.63  | -3.51  | -0.87  | 0.24   | -2.97  |
| -1.48  | -0.90  | -0.31  | -1.94  | -0.88  | -0.94  | -0.83  | -0.52  | -1.89  | -1.48  | -0.59  | -2.18  | -1.13  | -0.97  | -0.46  | -1.27  | 0.15   | 1.59   | -0.52  | -1.66  | -0.32  | -0.20  | 0.01   | -0.12  | -0.23  | 0.57   | 0.46   | -1.04  |
| 2.64   | 3.72   | 3.00   | 3.60   | 2.54   | 1.14   | 0.08   | 2.11   | 3.62   | 3.13   | 2.81   | 1.88   | 3.19   | 2.26   | 2.01   | 4.30   | 3.46   | 3.23   | 3.20   | 2.04   | 3.52   | 2.20   | 3.36   | 8.81   | 3.07   | 1.70   | 3.28   | 3.01   |
| -2.70  | -1.62  | -1.27  | -3.82  | -4.71  | -7.30  | -3.88  | -3.78  | -2.00  | -6.73  | -3.72  | -7.90  | -2.70  | -0.46  | -1.68  | 1.18   | 2.76   | -0.20  | 3.29   | 0.52   | -1.34  | -1.76  | -1.90  | -2.03  | -1.71  | -0.35  | -2.15  | -0.05  |
| 4.12   | 3.99   | 4.08   | 3.47   | 3.77   | 3.69   | 3.87   | 2.61   | 2.06   | 2.24   | 3.92   | 2.15   | 4.21   | 0.89   | 1.94   | 1.79   | 3.90   | 4.38   | 3.58   | 2.79   | 1.94   | 2.09   | 1.99   | 0.82   | 4.34   | 2.93   | 3.12   | 3.26   |
| -0.33  | 1.75   | 2.43   | -0.04  | 2.80   | 1.29   | 1.59   | 1.17   | 2.28   | 0.80   | 0.74   | 0.07   | 1.66   | 1.17   | -0.42  | -1.03  | 0.66   | 1.64   | 0.03   | 0.26   | -0.53  | 1.23   | 0.09   | -2.84  | 0.45   | 1.05   | -0.32  | -0.32  |
| 10.23  | 7.38   | 7.41   | 9.58   | 7.33   | 4.42   | 4.76   | 5.27   | 7.83   | 7.28   | 5.90   | 8.04   | 8.29   | 0.57   | 2.13   | -4.99  | -8.54  | -3.38  | -1.17  | -7.10  | -3.36  | 3.25   | -3.30  | -9.04  | -10.55 | -6.72  | -5.12  | -6.30  |
| 9.70   | 8.17   | 8.43   | 9.76   | 8.41   | 6.69   | 6.00   | 5.86   | 9.00   | 8.52   | 5.77   | 9.01   | 9.06   | -0.49  | 3.54   | -4.73  | -11.85 | -3.54  | -1.55  | -6.11  | -1.45  | 3.36   | -1.21  | -9.83  | -11.77 | -4.57  | -6.75  | -8.58  |
| -26.42 | -25.18 | -23.99 | -21.84 | -29.04 | -15.93 | -14.55 | -17.80 | -24.07 | -24.94 | -19.28 | -22.74 | -23.00 | -9.18  | -1.16  | -11.05 | -15.63 | -16.01 | -9.07  | -14.53 | -12.39 | -4.49  | -10.72 | -17.83 | -21.75 | -18.29 | -12.19 | -14.25 |
| -8.25  | -6.34  | -9.99  | -7.77  | -10.87 | -4.06  | -6.37  | -3.07  | -9.96  | -7.95  | -5.23  | -8.98  | -6.14  | 1.65   | 2.65   | 0.50   | 3.06   | 1.57   | 0.11   | 1.15   | 0.05   | 0.78   | 0.47   | 2.28   | 3.01   | 2.75   | 1.12   | 2.09   |
| -15.05 | -15.37 | -19.16 | -11.01 | -17.01 | -9.42  | -14.44 | -5.88  | -14.05 | -13.53 | -9.06  | -15.26 | -12.29 | 3.22   | 2.60   | 1.58   | 3.20   | 1.90   | 3.11   | 3.87   | 2.85   | 1.49   | 2.66   | 4.77   | 3.83   | 1.86   | 3.63   | 3.92   |
| 0.78   | 0.24   | -2.54  | 0.90   | 2.45   | 2.68   | 1.18   | 2.67   | 0.18   | -0.57  | 3.32   | 1.73   | 2.23   | 3.22   | 3.67   | 1.80   | -0.65  | 1.80   | 1.60   | 5.51   | 1.65   | 0.75   | -0.25  | -1.99  | -1.70  | -0.43  | 3.86   | -4.02  |
| -19.62 | -22.40 | -25.13 | -22.06 | -23.59 | -14.17 | -14.58 | -17.42 | -19.95 | -21.26 | -18.30 | -21.96 | -20.00 | -17.46 | -19.46 | -20.40 | -22.67 | -23.86 | -22.28 | -22.86 | -15.69 | -16.62 | -21.39 | -19.72 | -19.83 | -21.91 | -21.88 | -22.72 |
| 2.29   | 1.98   | 3.52   | 3.65   | 3.78   | 0.90   | 1.43   | 1.68   | 1.97   | 2.14   | 2.25   | 2.52   | 3.01   | 1.69   | 1.72   | 1.21   | 1.09   | 3.79   | 3.12   | 2.93   | 3.10   | 1.29   | 1.92   | 1.40   | 2.02   | 2.02   | 1.30   | 2.59   |
| 5.22   | 3.72   | 4.60   | 4.60   | 4.47   | 1.06   | 4.75   | 3.12   | 1.88   | 3.04   | 2.88   | 2.30   | 3.00   | 2.88   | 3.20   | 3.00   | 2.91   | 5.00   | 2.83   | 3.77   | 4.02   | 3.59   | 1.57   | 1.79   | 2.29   | 3.46   | 3.10   | 3.14   |
| -1.63  | 1.74   | 2.34   | 0.10   | 0.83   | 0.21   | 0.04   | 0.27   | -0.28  | -0.94  | 1.47   | -1.75  | -0.93  | -0.95  | -1.34  | -1.06  | -1.06  | 0.60   | -0.73  | 0.74   | 0.43   | 0.17   | 0.03   | -0.04  | 0.55   | -1.03  | -0.72  | -0.72  |
| 0.58   | 0.83   | 0.77   | 0.57   | 0.65   | -0.09  | -0.23  | 0.27   | -1.17  | 1.24   | 0.33   | -0.42  | -0.08  | -0.98  | -0.72  | -1.48  | 0.23   | 0.46   | 0.43   | -0.77  | -1.49  | -0.31  | -0.89  | -1.79  | -1.21  | -0.78  | 0.75   | 0.35   |
| 3.11   | 2.02   | 1.55   | 3.74   | 1.71   | 0.11   | 0.92   | 1.85   | 1.89   | 0.48   | 1.68   | 2.95   | 1.92   | 0.43   | 2.99   | 0.87   | 2.35   | 2.38   | 2.52   | 1.88   | 0.02   | 2.52   | 1.03   | 3.76   | 2.48   | 1.01   | 0.74   | -0.09  |
| -6.01  | 1.91   | -8.77  | -3.62  | -9.92  | -2.75  | -2.89  | -1.28  | -7.72  | -3.63  | -1.83  | -8.52  | -6.86  | -16.81 | -18.88 | -21.26 | 5.09   | 5.24   | -8.46  | -17.51 | -34.73 | -25.33 | -17.85 | -5.72  | -5.29  | -20.43 | -18.23 | -4.74  |
| -9.49  | 1.56   | -13.56 | -6.56  | -14.23 | -3.74  | -3.78  | -1.63  | -9.69  | -5.25  | -4.51  | -13.40 | -5.51  | -27.80 | -30.99 | -30.35 | -6.90  | 3.13   | -13.73 | -26.32 | -44.91 | -35.93 | -28.38 | -16.19 | -9.40  | -26.58 | -27.41 | -18.13 |
| -15.55 | -2.92  | -24.25 | -8.91  | -21.46 | -5.80  | -8.31  | 0.45   | -17.48 | -9.98  | -9.22  | -19.66 | -8.56  | -39.10 | -42.74 | -40.73 | -20.26 | -5.77  | -20.93 | -38.49 | -60.63 | -48.17 | -38.10 | -26.43 | -21.13 | -31.70 | -38.33 | -33.07 |
| 5.74   | 4.88   | 8.43   | 7.37   | 9.85   | 6.51   | 6.45   | 3.34   | 4.73   | 4.18   | 6.30   | 5.15   | 5.29   | -0.49  | 4.52   | -6.27  | -7.19  | -3.41  | -2.03  | -5.39  | 1.57   | 3.75   | -1.75  | -1.87  | -8.63  | -6.49  | -3.88  | -8.39  |
| 8.36   | 5.97   | 7.98   | 8.42   | 7.40   | 8.90   | 8.41   | 6.86   | 5.20   | 4.01   | 5.95   | 7.05   | 7.49   | -2.03  | 3.28   | -2.83  | -11.39 | -6.86  | -4.11  | -9.14  | -1.10  | 3.89   | -4.25  | -11.70 | -10.84 | -9.78  | -5.75  | -11.89 |
| -19.41 | -19.38 | -20.77 | -22.14 | -25.08 | -19.30 | -19.63 | -15.33 | -18.61 | -17.81 | -14.04 | -17.00 | -16.18 | -11.08 | -12.32 | -11.30 | -9.24  | -10.83 | -10.38 | -9.79  | -11.38 | -13.10 | -12.48 | -14.06 | -12.12 | -12.01 | -12.97 | -13.08 |
| 3.68   | 6.19   | 7.56   | 4.81   | 7.92   | 3.06   | 5.21   | 3.84   | 3.02   | 2.08   | 2.96   | 4.30   | 2.58   | 0.20   | 0.21   | 1.01   | -2.24  | 2.19   | 0.76   | -2.01  | -0.20  | 1.52   | -1.22  | -1.80  | -1.73  | -0.62  | 0.72   | -1.07  |
| 40.77  | 46.60  | 43.30  | 40.02  | 43.04  | 33.90  | 37.24  | 32.48  | 40.26  | 37.28  | 38.98  | 39.62  | 44.87  | 6.74   | 4.29   | -0.86  | -6.44  | 2.92   | 4.17   | -2.26  | 5.19   | 7.95   | 2.46   | -3.39  | 2.08   | 11.41  | 0.94   | -3.25  |
| -0.34  | -0.27  | 3.36   | 2.62   | 1.85   | 2.64   | -0.27  | 2.21   | 2.30   | 1.08   | -3.87  | 1.46   | -1.58  | 1.10   | 0.95   | -0.30  | -3.86  | -6.95  | 0.99   | -4.68  | 1.94   | 0.79   | 0.53   | -3.66  | 2.88   | 4.32   | 0.55   | -0.19  |
| -3.13  | -3.08  | -2.81  | -1.11  | -4.13  | -2.41  | -1.83  | -2.77  | -2.87  | -1.66  | -1.10  | -2.08  | -2.26  | -0.49  | 0.01   | 1.29   | 1.90   | 1.30   | 1.40   | 3.03   | 1.39   | -0.18  | 1.16   | 3.22   | 3.92   | 2.44   | 1.04   | 4.59   |
| -4.54  | -3.31  | -4.41  | -2.19  | -5.54  | -2.82  | -1.93  | -1.08  | -2.46  | -3.42  | -1.30  | -3.52  | -2.43  | 0.28   | -1.33  | 0.79   | 1.87   | 2.17   | 1.40   | 2.12   | -0.07  | -1.09  | 0.93   | 2.97   | 2.32   | 1.62   | 1.54   | 3.03   |
| -2.34  | -1.54  | -0.54  | -2.74  | 0.09   | -0.78  | -2.69  | 0.69   | -2.06  | -0.37  | -0.47  | -3.22  | -0.87  | 0.71   | -1.30  | 0.69   | 2.52   | 2.93   | 1.92   | 3.59   | 0.98   | 0.44   | 2.19   | 2.00   | 4.00   | 2.12   | 0.80   | 1.89   |
| 8.62   | 8.31   | 4.68   | 4.98   | 11.18  | 0.48   | 1.91   | 5.41   | 6.31   | 5.26   | 4.39   | 1.94   | 3.96   | 6.03   | 4.71   | 5.42   | 6.76   | 7.02   | 4.49   | 4.96   | 4.40   | 3.68   | 5.41   | 3.52   | 5.06   | 5.78   | 6.90   | 4.24   |
| 16.16  | 15.35  | 8.84   | 7.10   | 16.87  | 3.99   | 4.01   | 6.03   | 15.05  | 16.07  | 10.50  | 11.72  | 11.08  | 13.99  | 5.31   | 10.87  | 16.53  | 14.47  | 12.47  | 8.32   | 10.17  | 8.19   | 13.37  | 11.50  | 16.25  | 12.67  | 14.39  | 13.56  |
| -2.30  | -      |        |        |        |        |        |        |        |        |        |        |        |        |        |        |        |        |        |        |        |        |        |        |        |        |        |        |

|        |        |        |        |        |        |        |        |        |        |        |        |        |        |        |        |        |        |        |        |        |        |        |        |        |        |        |        |       |
|--------|--------|--------|--------|--------|--------|--------|--------|--------|--------|--------|--------|--------|--------|--------|--------|--------|--------|--------|--------|--------|--------|--------|--------|--------|--------|--------|--------|-------|
| 4.79   | 1.99   | 3.56   | 3.61   | 4.05   | 3.11   | 3.09   | 5.23   | 3.30   | 4.19   | 3.87   | 2.19   | 4.57   | 1.54   | 4.62   | -1.52  | 4.62   | -1.52  | 1.22   | -5.04  | 0.75   | 2.16   | -3.90  | -3.45  | -13.17 | -4.73  | -3.41  | -7.83  |       |
| 7.33   | 5.53   | 7.69   | 7.51   | 6.85   | 6.52   | 5.67   | 6.17   | 4.98   | 7.14   | 7.29   | 6.70   | 7.40   | 2.14   | 5.35   | -0.73  | 5.35   | -0.44  | 0.17   | -5.59  | 2.41   | 4.19   | -5.84  | -6.49  | -13.37 | -6.46  | -3.28  | -11.97 |       |
| -13.21 | -18.55 | -14.24 | -13.16 | -18.04 | -11.86 | -9.96  | -12.87 | -15.66 | -15.88 | -13.54 | -14.83 | -13.85 | -5.11  | -1.34  | -7.51  | -1.34  | -8.68  | -5.32  | -7.32  | -7.33  | -4.28  | -10.47 | -9.61  | -18.57 | -12.14 | -9.05  | -15.31 |       |
| 0.57   | 2.55   | 2.90   | 1.38   | 1.26   | 0.92   | 0.31   | 0.53   | 1.88   | -0.10  | 1.33   | -0.26  | 2.11   | 1.87   | 3.05   | 1.92   | 3.05   | 1.47   | 0.01   | 2.63   | 0.43   | 0.62   | -0.43  | 0.64   | 1.67   | 0.93   | 1.13   | 0.33   |       |
| -0.23  | 0.03   | 1.11   | 2.26   | 0.95   | -1.34  | -0.15  | -0.06  | -1.01  | -1.14  | 0.59   | -0.52  | 0.33   | -0.95  | -0.08  | 0.11   | -0.08  | 1.38   | -0.12  | 0.01   | 0.56   | 0.17   | -0.23  | -0.74  | -1.43  | 0.10   | -0.49  | -0.33  |       |
| 2.06   | 3.61   | 4.27   | 1.61   | 2.54   | 1.88   | 0.81   | 1.80   | 0.07   | 0.61   | 0.64   | 1.07   | 2.97   | 2.31   | 2.66   | 1.20   | 2.66   | 0.92   | 3.14   | 2.43   | 3.06   | 0.39   | 1.62   | 1.54   | 0.47   | 1.26   | 2.88   | 1.88   |       |
| 1.88   | 2.97   | 3.75   | 2.75   | 5.20   | -2.79  | -4.24  | -1.78  | 1.10   | 1.53   | 0.30   | 0.37   | 2.04   | 0.79   | 0.57   | 1.09   | 0.57   | -1.30  | 1.26   | 1.32   | 0.07   | 2.07   | 2.20   | 0.32   | -3.88  | 0.03   | 1.79   | 0.52   |       |
| 2.69   | 3.04   | 2.74   | 3.98   | 3.02   | 1.37   | 1.76   | 1.28   | 0.87   | 1.85   | 1.55   | 1.59   | 2.07   | 2.79   | 3.35   | 3.48   | 3.35   | 1.77   | 2.61   | 2.85   | 1.72   | 1.23   | 1.40   | 0.22   | 0.92   | 1.16   | 2.03   | 1.18   |       |
| 7.85   | 7.38   | 5.88   | 6.96   | 7.19   | 4.69   | 3.06   | 5.83   | 5.68   | 5.00   | 5.35   | 4.08   | 3.12   | 4.65   | 5.03   | 7.33   | 5.03   | 6.05   | 5.48   | 6.18   | 3.97   | 2.73   | 4.41   | 3.22   | 3.96   | 2.40   | 4.43   | 3.21   |       |
| 2.69   | 2.31   | 1.81   | 2.57   | 2.69   | 2.17   | 1.94   | 0.68   | 1.18   | 3.04   | 1.97   | 1.29   | 1.15   | 3.04   | 3.07   | 2.90   | 3.07   | 2.58   | 2.24   | 2.87   | 2.78   | 3.99   | 3.22   | 3.57   | 3.59   | 3.91   | 2.01   | 3.24   |       |
| 2.92   | 2.67   | 3.62   | 2.54   | 2.23   | 0.73   | 1.21   | 1.91   | 2.03   | 1.66   | 1.99   | 1.48   | 1.80   | 2.73   | 2.87   | 1.45   | 2.87   | 4.15   | 4.38   | 2.44   | 2.23   | 1.12   | 2.62   | 1.80   | 4.06   | 3.15   | 2.23   | 1.60   |       |
| 2.73   | 1.92   | 2.22   | 2.35   | 3.56   | 1.49   | 0.03   | 0.23   | 0.98   | 2.05   | 0.74   | 1.08   | 2.43   | 1.77   | 3.15   | 0.31   | 3.15   | 1.65   | 4.07   | 1.70   | 1.32   | 1.72   | 2.08   | 2.05   | 1.27   | 1.42   | 1.23   | 2.06   |       |
| 0.74   | 1.00   | 1.55   | 0.39   | -0.49  | 0.97   | -0.69  | 1.14   | -0.37  | -1.32  | -1.20  | -0.01  | -0.57  | -1.19  | 1.98   | -1.79  | 1.98   | 0.75   | -1.39  | -0.20  | -1.24  | -0.45  | -0.74  | -0.77  | -5.46  | -0.63  | -0.01  | -2.14  |       |
| -0.51  | -0.28  | 0.40   | -1.84  | -1.38  | -1.48  | -0.74  | -0.37  | -2.23  | -1.50  | 0.07   | -1.46  | -0.30  | -1.07  | -1.13  | -0.44  | -1.13  | 1.26   | -0.04  | -1.45  | -2.64  | -0.51  | -0.08  | -0.02  | -0.41  | 0.72   | 0.75   | -1.09  |       |
| 1.30   | 4.77   | 2.56   | 3.71   | 2.10   | 0.81   | 1.40   | 2.90   | 3.09   | 2.01   | 2.30   | 1.94   | 2.35   | 3.17   | 3.02   | 3.25   | 3.02   | 3.70   | 3.29   | 0.46   | 3.69   | 2.87   | 4.19   | 7.52   | 1.74   | 3.05   | 3.31   | 2.77   |       |
| -1.13  | 0.67   | -1.78  | -2.31  | -2.23  | -6.47  | -5.52  | -2.89  | -3.37  | -2.49  | -5.19  | -2.92  | -5.51  | -0.98  | -1.24  | -0.77  | -1.24  | 2.10   | -0.69  | 0.60   | -2.40  | -1.14  | -2.54  | -2.12  | -2.87  | -1.94  | -0.39  | -2.86  | -0.25 |
| 2.43   | 2.63   | 4.77   | 2.61   | 3.15   | 4.11   | 2.94   | 2.72   | 2.36   | 1.83   | 3.08   | 1.91   | 3.90   | 1.66   | 2.21   | 2.57   | 2.21   | 4.59   | 3.40   | 2.45   | 1.11   | 2.28   | 3.18   | 0.31   | 4.70   | 3.39   | 3.59   | 3.67   |       |
| 1.45   | 1.54   | 2.27   | 0.39   | 2.96   | 1.56   | 0.49   | 1.48   | 2.65   | 1.43   | 0.48   | 0.69   | 1.82   | -0.07  | 0.20   | -0.86  | 0.20   | 1.59   | 1.31   | 1.19   | 0.01   | 0.76   | -0.21  | -3.28  | -0.14  | 1.08   | -0.25  | -0.30  |       |
| 7.61   | 7.51   | 7.76   | 9.26   | 6.65   | 6.46   | 4.25   | 5.70   | 7.41   | 6.77   | 5.68   | 8.17   | 8.31   | -1.54  | 3.78   | -4.19  | 3.78   | -1.99  | 0.29   | -7.18  | -4.09  | 3.57   | -2.69  | -9.98  | -10.37 | -5.83  | -4.17  | -5.98  |       |
| 8.21   | 7.64   | 7.47   | 9.29   | 8.05   | 6.66   | 6.27   | 6.56   | 9.16   | 8.40   | 6.14   | 8.66   | 9.09   | -0.59  | 2.87   | -4.18  | 2.87   | -3.33  | -2.06  | -5.59  | -0.87  | 3.45   | -1.06  | -11.41 | -11.19 | -4.64  | -6.29  | -6.26  |       |
| -25.39 | -32.90 | -23.32 | -21.26 | -26.64 | -16.76 | -13.78 | -18.38 | -23.78 | -23.59 | -18.99 | -23.21 | -22.37 | -11.83 | -2.59  | -11.97 | -2.59  | -17.08 | -9.97  | -15.46 | -13.97 | -7.12  | -11.35 | -19.06 | -25.82 | -18.88 | -13.29 | -15.05 |       |
| -8.83  | -6.92  | -11.01 | -8.90  | -12.39 | -4.81  | -7.12  | -3.39  | -9.51  | -9.08  | -6.65  | -9.28  | -7.66  | 2.01   | 3.44   | 0.43   | 3.44   | 1.25   | 0.43   | 1.22   | 0.14   | 0.18   | -0.30  | 3.08   | 3.23   | 2.15   | 2.23   | 2.12   |       |
| -14.57 | -16.46 | -18.83 | -12.02 | -20.13 | -10.89 | -15.34 | -7.94  | -14.24 | -13.15 | -10.72 | -14.41 | -13.48 | 2.34   | 2.26   | 1.42   | 2.26   | 0.67   | 3.09   | 3.44   | 2.49   | 0.56   | 2.92   | 4.13   | 2.22   | 1.28   | 1.79   | 3.74   |       |
| 0.94   | -0.33  | -1.61  | 0.86   | 2.14   | 1.30   | 0.99   | 1.48   | 1.53   | -1.39  | 3.74   | 0.03   | 0.35   | 2.84   | 3.69   | 1.85   | 3.69   | 1.05   | 1.43   | 4.37   | 1.81   | 2.26   | 0.42   | -1.46  | -1.89  | 0.47   | 3.29   | -4.51  |       |
| -20.79 | -22.98 | -27.05 | -23.69 | -25.99 | -15.02 | -16.69 | -18.81 | -20.71 | -22.95 | -19.81 | -23.84 | -20.12 | -17.81 | -20.61 | -22.14 | -20.61 | -26.52 | -23.50 | -24.28 | -18.68 | -19.48 | -23.25 | -21.57 | -20.77 | -23.81 | -23.70 | -25.56 |       |
| 2.37   | 2.07   | 2.90   | 3.86   | 2.79   | 1.25   | 1.89   | 1.50   | 0.80   | 1.78   | 2.48   | 2.87   | 2.81   | 1.59   | 1.72   | 2.09   | 1.72   | 3.18   | 1.81   | 3.52   | 1.15   | 1.79   | 2.10   | 1.11   | 0.93   | 2.77   | 2.51   | 2.88   |       |
| 5.74   | 3.16   | 6.24   | 6.21   | 6.99   | 1.90   | 3.86   | 5.11   | 2.10   | 3.20   | 2.73   | 2.94   | 4.17   | 3.25   | 4.25   | 2.48   | 4.25   | 6.10   | 3.23   | 4.15   | 1.72   | 4.57   | 2.23   | 1.18   | 1.63   | 3.19   | 3.05   | 2.93   |       |
| -1.91  | 1.11   | 1.38   | 1.07   | 1.06   | -0.36  | 0.44   | 0.70   | -0.50  | -0.17  | -0.08  | -1.79  | -0.53  | -0.78  | -1.56  | -1.52  | -1.56  | 1.07   | -1.41  | 1.62   | -0.32  | 0.67   | -0.34  | 0.43   | 0.20   | -0.52  | -0.65  | -0.90  |       |
| 0.22   | 0.00   | 1.53   | -0.09  | 0.43   | 0.30   | -0.96  | 0.31   | -1.44  | 0.13   | -0.26  | -0.59  | 0.18   | -0.73  | -0.85  | -1.42  | -0.85  | 0.06   | 0.19   | -1.39  | -1.04  | -0.95  | -1.51  | -1.92  | -1.52  | -0.65  | -0.59  | -0.12  |       |
| 1.57   | 2.39   | 1.96   | 3.11   | 1.81   | 0.70   | 0.67   | 0.93   | 1.90   | 0.58   | 0.78   | 2.19   | 0.67   | 2.28   | 2.17   | -1.33  | 2.17   | 2.57   | 1.71   | 1.64   | 0.69   | 3.05   | 2.50   | 2.99   | 1.85   | 0.41   | 1.18   | 0.36   |       |
| -7.42  | 0.25   | -10.16 | -5.34  | -11.14 | -2.70  | -4.47  | -0.80  | -7.99  | -4.48  | -5.17  | -10.78 | -6.64  | -19.02 | -20.93 | -25.56 | -20.93 | 5.42   | -11.17 | -19.57 | -37.66 | -27.80 | -18.86 | -7.34  | -5.82  | -21.77 | -21.53 | -7.64  |       |
| -13.10 | -0.68  | -15.45 | -8.42  | -14.57 | -6.50  | -7.54  | -2.65  | -12.01 | -7.61  | -8.54  | -17.43 | -7.11  | -30.27 | -32.64 | -34.47 | -32.64 | 2.14   | -15.32 | -29.17 | -49.85 | -39.80 | -31.40 | -18.80 | -13.37 | -28.37 | -31.55 | -21.13 |       |
| -20.69 | -4.62  | -26.93 | -12.87 | -20.77 | -11.03 | -14.15 | -2.14  | -20.75 | -13.21 | -14.94 | -25.38 | -9.94  | -43.72 | -46.35 | -45.40 | -46.35 | -6.83  | -24.30 | -42.76 | -64.48 | -51.41 | -40.50 | -28.51 | -23.94 | -33.40 | -42.54 | -36.81 |       |
| 5.40   | 5.13   | 7.77   | 6.38   | 6.69   | 6.09   | 5.86   | 3.66   | 4.65   | 4.08   | 5.43   | 6.01   | 4.37   | -0.68  | 4.98   | -1.55  | 4.98   | -3.07  | -1.86  | -4.96  | 1.26   | 4.57   | -1.31  | -7.80  | -8.71  | -6.19  | -3.25  | -9.09  |       |
| 7.03   | 5.13   | 7.02   | 7.05   | 6.63   | 7.69   | 6.96   | 5.64   | 3.99   | 5.51   | 5.39   | 7.13   | 6.03   | -1.47  | 4.26   | -3.36  | 4.26   | -5.57  | -4.28  | -9.03  | 1.10   | 4.70   | -3.80  | -10.77 | -11.17 | -9.29  | -5.97  | -11.04 |       |
| -16.39 | -17.59 | -16.90 | -18.43 | -20.50 | -17.08 | -17.77 | -14.08 | -17.25 | -14.79 | -13.04 | -14.14 | -14.41 | -11.73 | -13.61 | -12.98 | -13.61 | -12.68 | -11.18 | -9.41  | -13.13 | -14.22 | -13.80 | -16.26 | -13.34 | -13.13 | -11.66 | -13.86 |       |
| 3.75   | 6.57   | 7.94   | 4.86   | 5.70   | 3.78   | 5.44   | 2.80   | 2.63   | 1.17   | 2.17   | 2.76   | 3.42   | 0.77   | 0.66   | 0.35   | 0.66   | 3.27   | 0.89   | -0.63  | 0.34   | 1.68   | -0.10  | -1.64  | 0.31   | 0.26   | 0.70   | -2.38  |       |
| 39.16  | 49.19  | 43.17  | 40.21  | 44.55  | 38.33  | 38.29  | 37.22  | 40.27  | 35.94  | 40.95  | 40.84  | 44.65  | 6.71   | 5.39   | 0.26   | 5.39   | 8.52   | 4.84   | -2.36  | 7.17   | 9.86   | 2.86   | -2.25  | -1.29  | 13.12  | -1.23  | -8.21  |       |
| 0.13   | 0.07   | 2.48   | 2.55   | 2.64   | 2.67   | -1.12  | 1.56   | 2.00   | 1.67   | -3.01  | 1.68   | -0.83  | 0.62   | 1.90   | -0.74  | 1.90   | -5.72  | 0.66   | -5.01  | 2.08   | -0.08  | 0.08   | -0.41  | -0.97  | 4.06   | -0.70  | -4.08  |       |
| -3.17  | -2.52  | -3.08  | -1.50  | -3.70  | -1.83  | -1.48  | -0.37  | -2.77  | -1.24  | -1.41  | -1.09  | -1.67  | -1.00  | 0.03   | 0.42   | 0.03   | 0.57   | 1.35   | 2.92   | 1.39   | -0.19  | -0.60  | 2.99   | 3.77   | 2.17   | 0.85   | 3.66   |       |
| -3.47  | -3.05  | -3.63  | -2.60  | -3.52  | -2.57  | -2.14  | -0.81  | -2.28  | -3.16  | -1.04  | -0.91  | -2.51  | -0.06  | -1.64  | 0.36   | -1.64  | 2.01   | 0.59   | 2.64   | -0.18  | -1.02  | 0.88   | 2.62   | 2.30   | 1.80   | 0.41   | 2.62   |       |
| -1.25  | -1.37  | 0.20   | -1.23  | -1.21  | -0.81  | -2.37  | -0.26  | -2.09  | -1.01  | -0.59  | -2.35  | -1.32  | 0.49   | -1.40  | 0.15   | -1.40  | 2.40   | 2.26   | 3.44   | 0.65   | -0.14  | 1.58   | 1.86   | 2.48   | 1.66   | 1.09   | 2.15   |       |
| 7.09   | 8.30   | 4.56   | 3.54   | 10.59  | 1.24   | 1.23   | 4.01   | 5.66   | 4.86   | 3.99   | 1.84   | 3.25   | 9.93   | 4.23   | 5.51   | 4.23   | 5.81   | 4.27   | 4.96   | 4.20   | 4.88   | 3.38   | 3.92   | 6.83   | 5.31   | 6.29   | 4.93   |       |
| 17.41  | 15.34  | 8.76   | 7.67   | 16.84  | 4.37   | 4.29   | 5.96   | 14.43  | 15.18  | 9.90   | 12.41  | 11.09  | 15.17  | 6.04   | 11.30  | 6.04   | 15.85  | 13.54  | 9.10   | 11.18  | 6.74   | 13.95  | 12.84  | 18.18  | 13.14  | 15.82  | 14.73  |       |
| -1.07  | -2.02  | -1.22  | 0.39   | -3.79  | -1.61  | -1.47  | -2.86  | -1.86  | -3.50  | -3.91  | -3.81  | -2.49  | -3.33  | -0.21  | -4.61  | -0.21  | -8.27  | -4.45  | -3.23  | -4.04  | -2.71  | -8.62  | -16.81 | -19.93 | -7.42  | -8.73  | -12.83 |       |
| 0.31   | 2.39   | 0.88   | 0.63   | 1.18   | 0.75   | 1.08   | 0.31   | -0.92  | 0.79   | 1.76   | 0.83   | 1.22   | 0.29   | 0.12   | -1.86  | 0.12   | 2.06   | 0.23   | 0.75   | 0.94   | -0.27  | 0.51   | -1.14  | 0.22   | 1.14   | -0.23  | 0.52   |       |
| -1.12  | -1.89  | -0.27  | 1.53   | -1.13  | -0.90  | 0.12   | -0.67  | -0.78  | -1.45  | -2.06  | -0.48  | -0.69  | -0.75  | -0.85  | -2.11  | -0.85  | 0.01   | -1.30  | -1.21  | -1.76  | -0.86  | -1.45  | -1.32  | -1.05  | -2.14  | -1.86  | -2.04  |       |
| -4.46  | -5.33  | -6.66  | -2.03  | -6.79  |        |        |        |        |        |        |        |        |        |        |        |        |        |        |        |        |        |        |        |        |        |        |        |       |

|        |        |        |        |        |        |        |        |        |        |        |        |        |        |        |        |        |        |        |        |        |        |        |        |        |        |        |        |
|--------|--------|--------|--------|--------|--------|--------|--------|--------|--------|--------|--------|--------|--------|--------|--------|--------|--------|--------|--------|--------|--------|--------|--------|--------|--------|--------|--------|
| 0.02   | 2.57   | 2.91   | 2.30   | 2.75   | -0.88  | 0.86   | 1.10   | 1.62   | -0.18  | 1.13   | 0.26   | 2.59   | 1.07   | 3.31   | 2.05   | 0.65   | 1.78   | 0.67   | 1.61   | 0.26   | 1.54   | -0.29  | 0.99   | 2.32   | 0.77   | 0.38   | 0.10   |
| -0.30  | -0.44  | 1.39   | 1.91   | 0.79   | -0.92  | 0.09   | 0.29   | -0.49  | -0.23  | -0.49  | -0.70  | -0.05  | -0.43  | -0.73  | 0.41   | 0.52   | 0.14   | -0.05  | 0.31   | 0.81   | 0.56   | -0.13  | -0.47  | -1.46  | 0.20   | 0.19   | -0.16  |
| 2.04   | 0.31   | 4.23   | 1.67   | 1.20   | 0.87   | 2.65   | 1.00   | 0.48   | 1.79   | 2.09   | 2.58   | 1.38   | 2.79   | 1.63   | -0.95  | 1.30   | 3.86   | 1.79   | 3.10   | 0.04   | 1.33   | 1.04   | 0.93   | 1.20   | 2.33   | 2.01   |        |
| 2.26   | 3.81   | 4.48   | 2.57   | 6.06   | -2.36  | -3.13  | -2.05  | 1.72   | 1.74   | -0.09  | -0.59  | 1.66   | 1.11   | 0.59   | 1.46   | 1.19   | -1.66  | 0.93   | 1.09   | -1.15  | 1.61   | 0.62   | -0.03  | -4.28  | 0.04   | 1.53   | 1.12   |
| 6.44   | 2.58   | 3.01   | 4.35   | 3.08   | 0.80   | 1.44   | 1.91   | 0.86   | 1.32   | 1.75   | 1.82   | 2.16   | 1.52   | 3.01   | 4.30   | 1.71   | 2.05   | 2.72   | 2.30   | 1.64   | 2.07   | 2.16   | 0.08   | 0.40   | 1.25   | 1.34   | 0.99   |
| 6.88   | 6.70   | 5.68   | 6.06   | 7.62   | 4.20   | 4.80   | 5.41   | 3.28   | 3.71   | 4.57   | 3.73   | 3.56   | 5.69   | 6.01   | 6.31   | 5.69   | 6.70   | 3.73   | 7.81   | 3.42   | 2.86   | 4.28   | 4.55   | 4.21   | 2.59   | 3.45   | 3.39   |
| 2.98   | 2.14   | 2.01   | 2.99   | 3.34   | 2.51   | 1.99   | 1.22   | 1.21   | 2.93   | 1.74   | 1.09   | 1.39   | 2.66   | 4.60   | 2.81   | 4.66   | 2.92   | 3.53   | 3.95   | 2.96   | 3.25   | 2.08   | 4.06   | 3.38   | 3.74   | 3.00   | 3.20   |
| 2.97   | 3.27   | 3.59   | 2.98   | 2.44   | 0.86   | 1.56   | 1.93   | 2.12   | 2.56   | 2.59   | 2.20   | 1.66   | 3.39   | 2.83   | 2.30   | 3.21   | 4.02   | 4.34   | 2.23   | 2.07   | 2.93   | 3.64   | 2.15   | 4.31   | 3.63   | 2.32   | 1.97   |
| 2.86   | 2.74   | 2.79   | 3.38   | 4.05   | 1.72   | 0.50   | 0.35   | 1.47   | 0.43   | 0.43   | 1.01   | 1.87   | 2.05   | 2.91   | 1.33   | 1.10   | 1.63   | 2.15   | 1.94   | 1.44   | 2.35   | 2.32   | 3.49   | 0.49   | 1.71   | 1.98   | 2.00   |
| 1.01   | 1.80   | 1.84   | 0.95   | 0.67   | 1.12   | -0.41  | 0.94   | -0.32  | 0.10   | -1.82  | -0.88  | 0.35   | -0.35  | 1.78   | -1.78  | -1.07  | 1.43   | -1.49  | -0.48  | -1.53  | -0.33  | -1.14  | -2.06  | -4.83  | -0.79  | -1.00  | -2.77  |
| -0.18  | 0.34   | 0.78   | -0.77  | -0.27  | -1.41  | -0.28  | 0.16   | -1.88  | -0.19  | 0.37   | -2.01  | -0.97  | -0.75  | -1.72  | -1.22  | -1.59  | 0.79   | 0.23   | -0.62  | -0.04  | -0.37  | -0.30  | -0.06  | 0.16   | 0.17   | 1.00   | -1.37  |
| 1.26   | 4.81   | 3.97   | 2.68   | 1.94   | 2.31   | 1.79   | 2.39   | 4.24   | 2.07   | 3.38   | 2.29   | 2.25   | 3.32   | 2.66   | 2.53   | 1.53   | 3.87   | 3.62   | 1.25   | 3.91   | 3.05   | 4.07   | 5.89   | 2.59   | 3.27   | 3.39   | 3.38   |
| -0.28  | -0.24  | 0.46   | -1.31  | -2.32  | -5.91  | -5.03  | -2.16  | -2.14  | -0.37  | -4.40  | -3.01  | -4.27  | -0.97  | -1.06  | -1.92  | 0.22   | 0.93   | -0.61  | 0.57   | -2.73  | -1.51  | -2.76  | -2.84  | -0.84  | -1.34  | -2.29  | -1.59  |
| 3.28   | 3.74   | 3.81   | 2.95   | 3.09   | 3.44   | 3.15   | 3.15   | 1.77   | 1.26   | 2.89   | 2.79   | 2.97   | 1.79   | 2.17   | 2.95   | 6.01   | 4.05   | 3.79   | 2.43   | 2.12   | 1.90   | 3.02   | 0.75   | 4.56   | 3.27   | 3.35   | 3.86   |
| -0.06  | 2.38   | 2.49   | 0.54   | 2.83   | 1.94   | 1.30   | 2.12   | 1.96   | 1.74   | 0.50   | 1.00   | 1.34   | 0.54   | -0.03  | -2.14  | -0.76  | 2.05   | 1.45   | -0.42  | -0.72  | 1.59   | 0.26   | -2.78  | 0.51   | 0.05   | -0.23  | -1.37  |
| 8.65   | 7.51   | 7.23   | 9.67   | 7.25   | 5.95   | 4.15   | 6.06   | 6.15   | 7.20   | 6.12   | 8.16   | 8.28   | -0.97  | 3.95   | -4.10  | -6.71  | -2.78  | -0.39  | -7.64  | -3.14  | 3.88   | -3.50  | -10.13 | -10.85 | -3.67  | -4.72  | -5.67  |
| 7.49   | 8.62   | 7.19   | 9.30   | 7.16   | 1.79   | 6.91   | 7.29   | 6.18   | 8.13   | 7.15   | 8.50   | 8.62   | -0.16  | 3.37   | -3.52  | -12.07 | -1.75  | -0.89  | -5.31  | -0.83  | 4.01   | -0.48  | -10.35 | -12.03 | -3.01  | -6.28  | -6.08  |
| -24.45 | -24.67 | -23.66 | -20.92 | -26.54 | -16.89 | -13.48 | -19.37 | -25.74 | -23.97 | -20.01 | -22.84 | -22.80 | -13.03 | -2.68  | -13.10 | -15.24 | -17.92 | -11.41 | -16.85 | -13.63 | -8.07  | -13.51 | -21.67 | -27.27 | -18.77 | -16.30 | -16.10 |
| -8.72  | -7.72  | -10.60 | -7.97  | -12.17 | -6.52  | -6.78  | -4.55  | -8.96  | -8.03  | -5.87  | -8.45  | -7.51  | 0.31   | 3.48   | -0.59  | 3.69   | 0.71   | -0.74  | 0.58   | 0.34   | 0.00   | 0.11   | 2.87   | 2.20   | 1.70   | 0.41   | 1.65   |
| -14.42 | -17.14 | -20.30 | -11.46 | -21.81 | -12.34 | -15.51 | -9.32  | -14.53 | -12.77 | -12.43 | -15.18 | -13.98 | 2.44   | 2.01   | 1.79   | 1.32   | -0.19  | 3.00   | 3.02   | 0.72   | -0.06  | 1.99   | 4.08   | 1.52   | 0.84   | 1.06   | 3.05   |
| 0.60   | 0.65   | -1.67  | 0.48   | 1.06   | 2.36   | 1.12   | 2.18   | 0.60   | -0.22  | 2.64   | 1.21   | 1.65   | 2.38   | 3.41   | 2.61   | 1.03   | 2.77   | 2.57   | 4.49   | 2.21   | 2.08   | 5.57   | -2.88  | -2.04  | 0.09   | 3.08   | -3.01  |
| -22.47 | -25.16 | -27.57 | -26.15 | -27.13 | -17.62 | -17.15 | -20.45 | -22.56 | -24.11 | -20.94 | -24.46 | -18.28 | -19.62 | -21.62 | -24.50 | -25.69 | -26.85 | -26.62 | -26.45 | -18.28 | -21.22 | -25.12 | -22.95 | -23.61 | -25.35 | -25.52 | -27.63 |
| 2.50   | 2.08   | 2.95   | 4.45   | 3.31   | 1.23   | 2.14   | 2.23   | 1.11   | 1.85   | 2.58   | 2.70   | 2.37   | 2.11   | 2.12   | 1.97   | 0.20   | 2.61   | 3.22   | 4.03   | 4.08   | 1.74   | 2.24   | 1.64   | 2.59   | 2.83   | 2.25   | 2.97   |
| 5.80   | 4.51   | 5.98   | 6.56   | 5.88   | 2.42   | 4.94   | 3.40   | 2.94   | 3.31   | 2.78   | 2.30   | 4.27   | 3.95   | 4.89   | 2.09   | 5.44   | 6.70   | 3.25   | 4.25   | 5.68   | 5.31   | 3.07   | 2.37   | 1.74   | 2.84   | 2.63   | 2.16   |
| -1.27  | 1.09   | 2.45   | 0.54   | 0.94   | 0.33   | -0.49  | -0.69  | -0.80  | 0.22   | 0.61   | -1.24  | -0.34  | -0.63  | -1.63  | -1.85  | -0.11  | -0.48  | -0.64  | 0.77   | -0.02  | 0.28   | -0.01  | 0.17   | 0.57   | -0.71  | 0.56   | -0.37  |
| 0.60   | 0.68   | 1.68   | 0.34   | 0.68   | -0.23  | -0.04  | -0.36  | -1.17  | 0.77   | 0.17   | -0.46  | -0.79  | -1.22  | -0.67  | -1.17  | 0.19   | -0.12  | 0.13   | -1.02  | -0.86  | -0.52  | -0.92  | -1.69  | -1.06  | -0.05  | -1.12  | -0.25  |
| 2.25   | 1.63   | 1.95   | 4.09   | 2.38   | 1.23   | 0.54   | 0.30   | 1.49   | 0.58   | 0.48   | 2.16   | 0.43   | 2.01   | 2.69   | 1.54   | 2.88   | 2.47   | 2.24   | 1.40   | 0.41   | 3.31   | 2.38   | 4.17   | 3.89   | 0.00   | 0.70   | 1.92   |
| -12.39 | -1.18  | -12.85 | -6.70  | -11.08 | -4.27  | -9.71  | -2.87  | -10.14 | -7.24  | -9.01  | -16.92 | -7.30  | -21.10 | -23.17 | -25.42 | 1.08   | 4.17   | -15.12 | -21.19 | -38.21 | -29.34 | -20.45 | -9.17  | -8.29  | -22.72 | -21.67 | -9.53  |
| -19.03 | -3.47  | -18.98 | -11.97 | -15.49 | -10.07 | -15.54 | -6.93  | -15.88 | -10.60 | -13.54 | -26.54 | -11.73 | -33.08 | -34.08 | -36.78 | -7.92  | -0.07  | -16.92 | -31.06 | -51.39 | -40.90 | -33.22 | -20.21 | -15.83 | -28.68 | -32.90 | -23.06 |
| -28.87 | -9.92  | -31.21 | -15.95 | -24.76 | -15.01 | -26.38 | -10.34 | -26.11 | -18.38 | -24.68 | -41.66 | -16.05 | -44.74 | -48.26 | -47.79 | -24.59 | -9.90  | -26.10 | -45.30 | -65.48 | -52.59 | -41.27 | -32.25 | -27.01 | -34.11 | -44.89 | -37.35 |
| 4.80   | 5.60   | 6.92   | 5.59   | 6.64   | 5.74   | 5.74   | 3.34   | 4.35   | 3.67   | 5.55   | 4.90   | 4.10   | -0.08  | 5.26   | -1.21  | -6.85  | -2.79  | -2.29  | -4.90  | 1.54   | 3.83   | -2.42  | -7.50  | -8.75  | -5.94  | -2.94  | -9.38  |
| 6.79   | 4.88   | 6.44   | 6.18   | 5.43   | 6.89   | 7.14   | 5.88   | 3.79   | 3.41   | 5.30   | 7.03   | 5.60   | -1.42  | 5.17   | -2.32  | -11.01 | -5.81  | -3.43  | -8.66  | 0.61   | 4.69   | -3.26  | -10.48 | -10.60 | -9.07  | -5.46  | -10.98 |
| -14.69 | -14.64 | -14.77 | -17.24 | -17.84 | -17.09 | -16.89 | -13.84 | -14.63 | -12.52 | -12.07 | -14.51 | -13.16 | -12.88 | -16.86 | -14.29 | -12.03 | -13.01 | -12.04 | -11.17 | -13.41 | -13.84 | -13.35 | -15.97 | -15.01 | -13.03 | -15.38 | -15.90 |
| 4.61   | 7.56   | 7.52   | 4.74   | 8.63   | 2.65   | 4.93   | 3.74   | 3.06   | 0.79   | 2.77   | 3.80   | 1.60   | 0.94   | 1.49   | 1.67   | -2.49  | 2.12   | 1.22   | -0.51  | 9.84   | 2.18   | -0.95  | -2.12  | 1.20   | 0.05   | -1.17  | -1.86  |
| 38.93  | 50.93  | 44.16  | 39.97  | 44.26  | 41.50  | 38.89  | 41.48  | 38.61  | 35.68  | 43.29  | 39.74  | 45.91  | 10.47  | 6.05   | 2.07   | -4.96  | 11.59  | 9.61   | -1.11  | 9.84   | 11.71  | 4.72   | 0.28   | -1.71  | 15.67  | 2.03   | -3.48  |
| -0.07  | 2.21   | 2.11   | 2.29   | 1.67   | 3.33   | -1.28  | 0.62   | 1.49   | 1.13   | -0.89  | 2.25   | -1.08  | 0.55   | 1.86   | 0.27   | -5.13  | -6.50  | 0.91   | -5.12  | 2.60   | 1.17   | 0.46   | -3.59  | -3.18  | 4.12   | 1.52   | -0.86  |
| -3.03  | -2.59  | -2.45  | -1.23  | -2.43  | -1.49  | -1.21  | 0.18   | -1.64  | -1.09  | -2.96  | -0.93  | -2.37  | -3.00  | 0.53   | 0.72   | 3.61   | 0.60   | 1.60   | 1.76   | 0.68   | 0.42   | -0.25  | 3.02   | 2.67   | 2.48   | 0.77   | 2.89   |
| -2.95  | -2.78  | -2.88  | -1.95  | -2.78  | -3.30  | -1.68  | -1.88  | -2.88  | -3.26  | -1.21  | -3.53  | -2.01  | 0.23   | -2.08  | 3.00   | 1.79   | 0.93   | 1.11   | 3.35   | -0.88  | -1.73  | 0.20   | 2.39   | 1.62   | 1.77   | 0.39   | 2.65   |
| -2.02  | -0.63  | -0.68  | -2.71  | 0.23   | -0.30  | -2.18  | 1.15   | -0.97  | -1.53  | -0.58  | -2.16  | -1.20  | -0.67  | 0.13   | 1.08   | 4.26   | 1.87   | 1.23   | 2.97   | 1.53   | 2.05   | 1.35   | 2.13   | 1.92   | 1.21   | 0.33   | 2.05   |
| 8.24   | 7.97   | 5.26   | 4.52   | 10.81  | 1.26   | 2.23   | 3.72   | 6.38   | 4.80   | 3.31   | 1.74   | 3.25   | 6.14   | 4.52   | 6.50   | 7.47   | 1.10   | 3.96   | 5.32   | 4.43   | 5.30   | 4.88   | 4.46   | 7.54   | 6.21   | 7.52   | 3.46   |
| 16.85  | 15.47  | 9.17   | 6.82   | 17.18  | 3.91   | 3.88   | 6.70   | 13.74  | 15.45  | 10.12  | 12.19  | 10.84  | 16.14  | 5.97   | 12.22  | 19.99  | 16.02  | 15.14  | 9.37   | 11.50  | 8.97   | 15.36  | 13.67  | 19.11  | 14.04  | 16.45  | 15.76  |
| -1.08  | -2.56  | -1.77  | -0.67  | -3.89  | -0.42  | -0.90  | -3.24  | -1.25  | -3.32  | -3.65  | -3.49  | -1.40  | -3.14  | -0.54  | -5.02  | -12.41 | -8.00  | -4.61  | -3.39  | -4.48  | -4.44  | -7.57  | -16.28 | -20.27 | -8.06  | -9.27  | -13.46 |
| 0.24   | 1.62   | 1.52   | 1.64   | 1.03   | 0.49   | 1.32   | 0.32   | -1.38  | 1.50   | 1.66   | 0.61   | -0.48  | 1.46   | -0.19  | -2.24  | 1.12   | 2.14   | -0.34  | 0.12   | 0.63   | -0.17  | 0.74   | 0.06   | 1.39   | 1.21   | 0.31   | 0.98   |
| -0.89  | -1.57  | -0.87  | 0.94   | -0.99  | -1.46  | 0.50   | -0.48  | -1.06  | -0.09  | -1.71  | -0.94  | -1.50  | -1.11  | -0.79  | -2.23  | -0.22  | -0.81  | -0.20  | -1.67  | -1.64  | -0.68  | -1.63  | -1.23  | -1.81  | -1.97  | -3.00  | -1.94  |
| -6.67  | -7.28  | -7.35  | -2.46  | -7.76  | -5.16  | -3.92  | -4.38  | -6.60  | -6.59  | -7.05  | -6.08  | -5.44  | -5.15  | -5.38  | -9.94  | -8.54  | -3.17  | -3.21  | -6.98  | -6.56  | -6.37  | -5.95  | -5.57  | -7.13  | -5.28  | -7.24  | -7.37  |
| 12.62  | 11.05  | 12.57  | 13.20  | 13.36  | 11.82  | 15.60  | 12.15  | 12.19  | 11.54  | 11.82  | 14.01  | 13.26  | 5.10   | 12.12  | 5.57   | -10.50 | -0.70  | 1.43   | 0.41   | 5.38   | 13.33  | 4.41   | -5.80  | -1.14  | -4.45  | 0.02   | -1.83  |
| 15.49  | 11.32  | 13.80  | 15.66  | 11.81  | 12.07  | 14.20  | 10.57  | 12.17  | 12.51  | 12.37  | 14.32  | 12.22  | 5.72   | 10.10  | 1.92   | -12.01 | -2.54  | 1.80   | -1.70  | 3.86   | 12.06  | 5.15   | -6.94  | -3.32  | -5.95  | 1.39   | -2.94  |
| -7.01  | -7.58  | -4.87  | -7     |        |        |        |        |        |        |        |        |        |        |        |        |        |        |        |        |        |        |        |        |        |        |        |        |

|        |        |        |        |        |        |        |        |        |        |        |        |        |        |        |        |        |        |        |        |        |        |        |        |        |        |        |        |
|--------|--------|--------|--------|--------|--------|--------|--------|--------|--------|--------|--------|--------|--------|--------|--------|--------|--------|--------|--------|--------|--------|--------|--------|--------|--------|--------|--------|
| 2.52   | 4.12   | 5.20   | 3.04   | 6.05   | -2.08  | -4.22  | -2.26  | 1.89   | 1.99   | 0.05   | 0.37   | 1.98   | 0.63   | 0.91   | 1.34   | 2.86   | -1.01  | 0.95   | 0.78   | -1.10  | 1.35   | 1.71   | 1.02   | -4.00  | -0.37  | 1.99   | 0.48   |
| 3.05   | 2.73   | 2.31   | 3.72   | 3.16   | 1.10   | 2.36   | 1.96   | 1.69   | 1.56   | 1.86   | 1.17   | 2.07   | 1.97   | 2.67   | 2.19   | 1.88   | 1.55   | 2.14   | 2.52   | 1.85   | 1.41   | 1.88   | -3.02  | 0.55   | 0.92   | 1.75   | 1.67   |
| 7.08   | 7.55   | 6.06   | 6.80   | 7.37   | 5.81   | 3.82   | 4.56   | 2.50   | 5.55   | 5.87   | 3.39   | 4.25   | 4.60   | 5.35   | 5.50   | 3.40   | 5.18   | 5.27   | 6.05   | 3.53   | 3.20   | 3.99   | 4.04   | 3.66   | 4.03   | 2.77   | 3.30   |
| 2.65   | 2.71   | 1.39   | 2.85   | 2.63   | 2.70   | 2.33   | 0.96   | 2.17   | 2.38   | 1.77   | 1.68   | 0.63   | 3.54   | 2.59   | 2.69   | 3.48   | 4.71   | 2.32   | 3.11   | 2.88   | 4.11   | 2.34   | 4.17   | 1.72   | 4.04   | 3.11   | 3.38   |
| 3.27   | 3.92   | 4.04   | 3.34   | 2.63   | 1.00   | 1.43   | 1.86   | 2.38   | 3.06   | 2.65   | 2.18   | 1.97   | 2.48   | 3.20   | 2.30   | 4.13   | 3.51   | 4.51   | 3.00   | 1.71   | 2.67   | 2.58   | 2.21   | 3.59   | 3.00   | 2.09   | 1.65   |
| 3.07   | 3.33   | 3.63   | 3.17   | 3.15   | 1.67   | 0.13   | 0.23   | 1.46   | 0.54   | 4.00   | -0.29  | 1.99   | 1.97   | 1.96   | 1.57   | 1.69   | 1.77   | 3.24   | 1.87   | 0.85   | 1.47   | 2.38   | 2.10   | 2.34   | 2.58   | 1.60   | 2.13   |
| 0.84   | 1.84   | 0.87   | 0.86   | 2.03   | 0.21   | 0.31   | 0.89   | -0.13  | -0.61  | -2.14  | -0.68  | 0.52   | -0.36  | 1.36   | -1.75  | 0.81   | 0.55   | -1.98  | -0.21  | -1.76  | -0.64  | -2.85  | -1.57  | -5.47  | -0.77  | -0.26  | -1.63  |
| 0.71   | 1.47   | 1.53   | -0.88  | -0.04  | 0.32   | -0.68  | -0.59  | -0.99  | -0.94  | 0.04   | -1.83  | -0.68  | -0.88  | -1.57  | -1.46  | 0.73   | 0.68   | 0.82   | -1.98  | -2.36  | -1.11  | -1.98  | -0.02  | -1.43  | 0.98   | 0.96   | -1.08  |
| 2.52   | 3.83   | 3.59   | 4.05   | 1.57   | 2.23   | 1.05   | 2.67   | 3.00   | 2.88   | 2.52   | 1.33   | 2.34   | 4.00   | 1.96   | 3.87   | 4.88   | 4.58   | 3.92   | 3.24   | 3.77   | 2.57   | 3.30   | 9.17   | 2.68   | 3.12   | 1.70   | 3.98   |
| -0.60  | 0.83   | 0.43   | -1.93  | -1.59  | -5.14  | -5.57  | -2.85  | -1.99  | -1.24  | -4.25  | -3.38  | -4.23  | -2.61  | -1.59  | -1.74  | 0.84   | 1.55   | -1.75  | 0.41   | -2.66  | -1.86  | -2.56  | -3.67  | -1.89  | -0.58  | -2.36  | -1.14  |
| 3.25   | 3.55   | 3.79   | 3.18   | 3.20   | 4.28   | 3.46   | 2.90   | 1.86   | 0.76   | 2.86   | 2.61   | 2.84   | 1.84   | 2.25   | 2.68   | 5.16   | 3.89   | 3.63   | 2.82   | 2.29   | 1.79   | 2.34   | 6.69   | 4.59   | 3.61   | 3.15   | 3.85   |
| 0.45   | 0.94   | 2.94   | 1.28   | 2.80   | 0.47   | 0.86   | 1.49   | 1.85   | 1.17   | -0.12  | -1.08  | 1.43   | 0.23   | 0.83   | -0.58  | 1.32   | 0.99   | 1.19   | 0.70   | -0.32  | 2.31   | -0.19  | -3.94  | -3.46  | 1.11   | 0.79   | 0.77   |
| 7.77   | 8.22   | 6.98   | 9.14   | 7.36   | 6.63   | 4.65   | 5.70   | 6.92   | 6.86   | 6.51   | 8.17   | 8.14   | 0.55   | 3.91   | -2.30  | -6.32  | -1.61  | 0.44   | -6.54  | -2.74  | 3.70   | -2.52  | -10.61 | -11.07 | -5.57  | -4.79  | -5.35  |
| 7.51   | 8.41   | 7.40   | 9.60   | 7.40   | 7.71   | 6.72   | 7.09   | 7.02   | 7.67   | 6.88   | 9.21   | 9.12   | 0.36   | 3.86   | -4.35  | -10.26 | -1.55  | -0.18  | -6.27  | -0.82  | 4.59   | 0.09   | -10.72 | -11.71 | -4.10  | -6.17  | -6.38  |
| -25.03 | -24.94 | -24.48 | -21.85 | -25.41 | -17.03 | -14.86 | -19.56 | -24.07 | -23.51 | -21.09 | -23.53 | -24.34 | -13.25 | -3.21  | -14.35 | -17.22 | -20.82 | -13.69 | -17.40 | -16.14 | -9.82  | -14.40 | -23.38 | -28.13 | -21.20 | -16.08 | -17.07 |
| -8.31  | -8.08  | -10.71 | -6.32  | -13.61 | -7.18  | -7.34  | -5.94  | -10.46 | -8.98  | -6.82  | -9.02  | -7.97  | 1.99   | 2.46   | -0.51  | 2.75   | 0.08   | -1.10  | 1.35   | -1.13  | -1.39  | -1.91  | 1.59   | 3.94   | -0.61  | -0.68  | 2.43   |
| -13.65 | -17.19 | -19.92 | -11.96 | -21.90 | -13.36 | -16.53 | -11.11 | -14.11 | -12.83 | -13.68 | -15.31 | -14.66 | 1.81   | 0.35   | 1.10   | 1.57   | -1.01  | 1.85   | 2.52   | -0.04  | -1.35  | 1.08   | 3.58   | 0.79   | 0.83   | 1.13   | 2.01   |
| 2.15   | 0.78   | -1.58  | -0.14  | 1.07   | 2.20   | 0.61   | 2.56   | -0.57  | -1.14  | 3.44   | 1.34   | 1.48   | 4.00   | 4.02   | 2.56   | -1.06  | 2.33   | 2.21   | 3.55   | 2.46   | 1.15   | -1.61  | -1.95  | -4.27  | -0.56  | 3.72   | -2.54  |
| -23.43 | -26.57 | -30.29 | -27.21 | -28.89 | -17.83 | -18.83 | -22.45 | -24.03 | -27.63 | -22.86 | -26.36 | -25.28 | -21.33 | -24.20 | -25.01 | -27.24 | -28.72 | -27.48 | -26.62 | -19.75 | -21.67 | -26.82 | -24.77 | -24.64 | -26.59 | -27.03 | -28.99 |
| 2.23   | 2.74   | 3.06   | 3.53   | 3.59   | 2.49   | 1.93   | 2.32   | 1.37   | 1.98   | 2.90   | 2.99   | 3.45   | 1.79   | 2.90   | 1.96   | 1.92   | 3.27   | 2.88   | 2.62   | 4.41   | 1.67   | 1.91   | 1.69   | 2.80   | 2.55   | 2.52   | 3.22   |
| 6.35   | 4.85   | 6.90   | 6.61   | 7.90   | 3.64   | 5.29   | 5.86   | 2.87   | 4.39   | 3.77   | 3.28   | 3.78   | 5.11   | 3.82   | 3.49   | 4.43   | 6.56   | 3.02   | 4.77   | 6.01   | 5.54   | 1.34   | 2.40   | 2.08   | 3.28   | 3.18   | 4.53   |
| -0.67  | 1.32   | 1.41   | 0.78   | 1.30   | 0.47   | -0.85  | 0.15   | -0.47  | -0.91  | -1.82  | -2.14  | -1.55  | -0.05  | -1.02  | -0.45  | -0.41  | 0.52   | -1.07  | -0.03  | -0.88  | 0.54   | 0.36   | -0.40  | -0.80  | -0.60  | -3.33  | -0.17  |
| 0.56   | 0.39   | 1.37   | -0.43  | 0.98   | 0.15   | -0.52  | -0.30  | -1.20  | 0.41   | 0.06   | -0.75  | 0.12   | -1.16  | -1.03  | -2.22  | 0.54   | -0.75  | 0.09   | -0.37  | -0.58  | -0.42  | -1.51  | -1.19  | -0.57  | -0.82  | -0.76  | -0.21  |
| 2.24   | 1.46   | 1.64   | 3.46   | 1.57   | 2.21   | 1.06   | 2.20   | 1.28   | 0.74   | 0.36   | 2.27   | 0.48   | 2.07   | 2.15   | 0.87   | 3.01   | 1.82   | 2.39   | 2.13   | -0.64  | 1.98   | 1.11   | 3.06   | 1.71   | 1.12   | 0.70   | 2.02   |
| -20.58 | -3.77  | -19.37 | -10.85 | -14.32 | -7.22  | -18.66 | -5.09  | -14.59 | -13.72 | -14.77 | -24.93 | -15.63 | -21.93 | -23.79 | -28.60 | 0.99   | 3.18   | -12.09 | -22.36 | -40.83 | -30.45 | -21.64 | -7.97  | -8.82  | -21.94 | -23.30 | -8.01  |
| -29.60 | -9.78  | -27.36 | -17.30 | -21.14 | -14.59 | -30.30 | -12.27 | -22.25 | -20.06 | -30.12 | -38.94 | -22.21 | -34.46 | -37.00 | -38.53 | -12.56 | -0.14  | -18.33 | -32.82 | -53.63 | -41.77 | -34.61 | -19.45 | -17.14 | -28.75 | -33.59 | -22.16 |
| -43.32 | -17.93 | -41.36 | -26.45 | -31.79 | -24.45 | -45.99 | -21.19 | -35.53 | -31.28 | -38.39 | -58.56 | -34.57 | -47.44 | -49.72 | -48.92 | -27.17 | -10.65 | -26.19 | -46.15 | -69.07 | -53.92 | -43.11 | -29.64 | -28.05 | -33.70 | -46.37 | -36.93 |
| 5.08   | 5.39   | 5.87   | 6.21   | 6.57   | 5.53   | 5.46   | 3.15   | 4.91   | 2.96   | 5.49   | 5.03   | 3.99   | 4.84   | 5.33   | 4.86   | -7.04  | -2.79  | -1.48  | -5.26  | 1.68   | 4.22   | -0.90  | -7.83  | -8.06  | -5.97  | -2.59  | -8.51  |
| 6.85   | 6.49   | 6.46   | 6.04   | 4.92   | 6.40   | 6.68   | 4.91   | 3.65   | 3.54   | 4.86   | 6.93   | 6.08   | -0.52  | 5.32   | -1.48  | -10.32 | -5.78  | -3.31  | -8.13  | 0.99   | 5.07   | -2.97  | -10.77 | -10.34 | -9.01  | -4.75  | -11.01 |
| -14.56 | -13.76 | -13.80 | -16.08 | -16.63 | -14.16 | -16.32 | -12.11 | -13.17 | -12.99 | -12.22 | -14.23 | -12.47 | -13.81 | -17.43 | -15.66 | -11.93 | -14.72 | -14.10 | -11.87 | -15.49 | -15.42 | -14.52 | -16.91 | -17.06 | -13.08 | -15.24 | -16.42 |
| 4.22   | 6.62   | 7.70   | 3.87   | 6.57   | 3.10   | 6.15   | 3.12   | 2.85   | 1.86   | 2.69   | 3.18   | 2.93   | 1.17   | 0.81   | 1.48   | -1.24  | 3.73   | 1.04   | -1.23  | 0.10   | 2.29   | 0.08   | -2.83  | 0.73   | -0.36  | -0.49  | -1.36  |
| 38.91  | 52.46  | 44.99  | 39.96  | 45.77  | 43.60  | 39.32  | 43.60  | 39.29  | 36.03  | 44.83  | 41.46  | 46.15  | 12.24  | 8.21   | 4.35   | -3.12  | 12.59  | 11.25  | -0.24  | 12.68  | 13.46  | 6.88   | 2.73   | 1.39   | 14.98  | 3.80   | -5.17  |
| -1.30  | -10.29 | 2.80   | 3.61   | 2.45   | 2.12   | -0.41  | 0.85   | 1.34   | 0.68   | -2.78  | 0.81   | -0.71  | -0.30  | 1.32   | -0.63  | -5.45  | -7.81  | 1.18   | -4.57  | 1.95   | 0.33   | 1.26   | -2.85  | -3.47  | 0.93   | 0.85   | -3.40  |
| -2.72  | -1.82  | -2.60  | -0.87  | -2.72  | -1.30  | -1.49  | -1.60  | -2.13  | -1.47  | -1.24  | -1.93  | -2.63  | -1.41  | -0.80  | -0.63  | 1.37   | -0.02  | 2.01   | 2.40   | 0.16   | -0.77  | -0.46  | 2.66   | 2.13   | 1.72   | 0.38   | 2.83   |
| -3.15  | -2.71  | -3.07  | -1.99  | -2.92  | -2.88  | -2.17  | -1.43  | -2.43  | -3.06  | -1.31  | -3.44  | -2.39  | -0.44  | -2.05  | -0.08  | 1.79   | 0.46   | 1.14   | 1.75   | -0.44  | -1.33  | -0.58  | 2.90   | 1.34   | 1.12   | 3.00   | 2.04   |
| -2.58  | -1.25  | -0.53  | -0.85  | 1.34   | -0.64  | -2.26  | 1.06   | -0.91  | -1.55  | -0.35  | -2.46  | -1.01  | -0.01  | -0.67  | -0.50  | 2.62   | 1.95   | 0.62   | 3.91   | -0.32  | -0.19  | 0.63   | 1.95   | 2.40   | 0.23   | 0.44   | 1.40   |
| 8.61   | 7.98   | 4.59   | 3.98   | 9.53   | 0.50   | 2.01   | 3.34   | 7.29   | 3.99   | 3.76   | 1.61   | 3.31   | 6.45   | 4.20   | 6.92   | 8.26   | 6.99   | 4.66   | 6.16   | 4.57   | 3.79   | 5.42   | 5.20   | 8.34   | 6.57   | 7.03   | 4.01   |
| 17.01  | 16.03  | 9.16   | 7.03   | 17.23  | 4.78   | 4.21   | 6.74   | 13.98  | 14.67  | 9.62   | 12.54  | 11.08  | 16.26  | 6.20   | 12.54  | 21.88  | 17.19  | 14.81  | 9.69   | 12.38  | 8.25   | 15.31  | 13.83  | 21.32  | 13.91  | 18.10  | 16.93  |
| -0.63  | -2.30  | -0.96  | -0.76  | -3.55  | -0.87  | -0.88  | -2.39  | -1.32  | -3.72  | -3.00  | -3.15  | -1.75  | -2.99  | -1.94  | -4.42  | -11.41 | -8.49  | -5.06  | -2.57  | -4.58  | -4.70  | -8.26  | -16.52 | -21.41 | -7.96  | -9.18  | -14.47 |
| -0.79  | 1.48   | 0.91   | 0.80   | 1.89   | 0.19   | 1.70   | -0.46  | -1.17  | 0.00   | 0.24   | 0.63   | 0.11   | -0.06  | -0.19  | -2.65  | 0.70   | 1.63   | -0.68  | 0.40   | 1.40   | -0.57  | -0.28  | 0.32   | 1.50   | 0.74   | -0.63  | 0.86   |
| -1.43  | -2.24  | -1.52  | 0.73   | -1.48  | -1.03  | -0.71  | -1.37  | -0.94  | -1.53  | -0.26  | -1.33  | -1.39  | -1.14  | -0.97  | -2.57  | -1.03  | -0.03  | -0.45  | -1.57  | -2.38  | -0.99  | -1.61  | -1.31  | -2.05  | -2.64  | -2.03  | -1.94  |
| -7.87  | -7.49  | -9.19  | -4.16  | -8.91  | -6.01  | -4.48  | -6.15  | -8.56  | -7.70  | -7.86  | -9.28  | -7.77  | -5.31  | -6.03  | -10.06 | -9.31  | -4.45  | -5.25  | -6.49  | -6.99  | -6.57  | -6.49  | -5.97  | -8.31  | -5.84  | -7.15  | -7.38  |
| 12.34  | 10.41  | 12.26  | 12.27  | 12.42  | 11.45  | 14.74  | 11.48  | 10.94  | 9.62   | 9.59   | 13.97  | 11.65  | 6.33   | 11.52  | 7.39   | -8.55  | -0.99  | 3.33   | 0.15   | 6.16   | 13.46  | 5.22   | -2.42  | -1.16  | -3.58  | 1.14   | -1.37  |
| 15.13  | 10.94  | 12.11  | 15.44  | 10.82  | 11.92  | 13.21  | 9.77   | 10.94  | 10.68  | 12.81  | 13.83  | 11.86  | 7.02   | 11.81  | 2.61   | -11.81 | -2.34  | 2.23   | -1.14  | 4.97   | 12.06  | 5.69   | -8.45  | -2.76  | -6.43  | 1.92   | -1.58  |
| -5.75  | -6.81  | -5.43  | -8.72  | -4.47  | -7.45  | -9.67  | -6.33  | -5.38  | -6.71  | -7.14  | -6.89  | -7.59  | -7.58  | -7.81  | -5.80  | -9.31  | -8.67  | -7.17  | -4.39  | -6.26  | -8.69  | -6.53  | -6.92  | -9.89  | -7.32  | -8.29  | -7.11  |
| 1.83   | 2.92   | 1.41   | 1.08   | 1.81   | 1.14   | 0.12   | -0.05  | -0.81  | 0.23   | 0.45   | 0.66   | -0.03  | 0.37   | -0.39  | -2.61  | -3.33  | 1.12   | -0.45  | 1.18   | -0.66  | 0.33   | -0.05  | 3.08   | 0.90   | -0.96  | -2.24  | -1.61  |
| 1.09   | -0.06  | 0.74   | -0.40  | -1.00  | 0.23   | -0.53  | -0.28  | -0.89  | 0.12   | -0.17  | -0.91  | 0.23   | -0.07  | -1.90  | -2.75  | -3.31  | 1.35   | 1.39   | -0.43  | -2.50  | -0.45  | -1.26  | -0.89  | -0.88  | -1.19  | -1.40  | -1.93  |
| 1.58   | 3      |        |        |        |        |        |        |        |        |        |        |        |        |        |        |        |        |        |        |        |        |        |        |        |        |        |        |

|        |        |        |        |        |        |        |        |        |        |        |        |        |        |        |        |        |        |        |        |        |        |        |        |        |        |        |        |       |
|--------|--------|--------|--------|--------|--------|--------|--------|--------|--------|--------|--------|--------|--------|--------|--------|--------|--------|--------|--------|--------|--------|--------|--------|--------|--------|--------|--------|-------|
| 2.83   | 1.80   | 2.19   | 3.83   | 3.09   | 1.96   | 2.28   | 1.30   | 1.88   | 3.39   | 2.23   | 1.70   | 1.43   | 4.06   | 4.23   | 3.39   | 4.48   | 5.07   | 1.28   | 3.86   | 2.66   | 3.01   | 3.32   | 3.99   | 3.25   | 3.70   | 3.24   | 3.52   |       |
| 3.04   | 3.86   | 3.39   | 2.82   | 3.08   | 2.00   | 1.46   | 1.88   | 2.23   | 1.81   | 2.64   | 1.89   | 1.66   | 2.35   | 2.73   | 2.06   | 4.21   | 3.69   | 4.81   | 2.92   | 2.64   | 3.00   | 2.63   | 2.43   | 4.25   | 2.81   | 2.52   | 1.90   |       |
| 2.14   | 2.14   | 3.19   | 2.90   | 4.46   | 2.00   | 0.10   | 0.78   | 2.05   | 1.41   | 1.05   | 0.17   | 0.32   | 2.03   | 3.11   | 1.07   | 2.19   | 2.30   | 3.58   | 1.91   | 2.15   | 1.09   | 3.14   | 3.18   | 1.40   | 2.52   | 1.89   | 1.87   |       |
| 1.98   | 1.29   | 2.01   | 0.29   | 0.65   | 1.16   | -1.32  | 0.71   | -0.12  | -0.76  | -2.02  | -0.40  | 0.01   | -0.71  | 1.96   | -2.01  | 1.31   | 1.70   | -3.09  | 0.68   | -1.52  | 0.11   | -1.23  | -3.37  | -4.33  | -0.04  | -0.86  | -2.04  |       |
| -0.33  | 0.99   | 1.54   | -0.22  | 0.94   | -0.10  | 0.10   | -0.54  | -1.03  | -0.49  | 0.03   | -1.82  | -0.24  | -1.76  | -1.25  | -2.25  | 1.76   | 1.01   | -0.25  | -1.83  | -2.30  | -0.45  | -0.99  | 2.03   | -1.09  | -0.08  | 0.94   | -1.44  |       |
| 2.07   | 3.58   | 2.59   | 3.59   | 3.34   | 2.28   | -0.20  | 1.45   | 3.29   | 0.80   | 1.43   | 1.74   | 0.83   | 2.67   | 2.70   | 2.47   | 6.43   | 3.57   | 5.31   | 0.32   | 2.96   | 2.32   | 5.46   | 8.40   | 2.94   | 3.97   | 1.77   | 3.56   |       |
| -0.25  | 0.60   | 0.45   | -1.34  | -0.86  | -5.09  | -5.67  | -2.59  | -0.50  | -0.82  | -3.83  | -2.31  | -3.39  | -1.67  | -0.77  | -2.58  | 2.78   | 1.21   | -0.57  | 0.25   | -3.03  | -1.97  | -3.08  | -4.30  | -3.46  | -1.21  | -2.73  | -0.47  |       |
| 3.57   | 3.52   | 3.82   | 3.04   | 3.22   | 4.02   | 3.23   | 3.26   | 1.24   | 1.86   | 2.61   | 1.93   | 2.69   | 1.87   | 1.98   | 2.84   | 4.62   | 5.04   | 3.61   | 3.42   | 1.78   | 2.32   | 2.93   | 3.78   | 3.55   | 4.09   | 3.30   | 4.30   |       |
| 0.30   | 1.43   | 2.72   | -0.10  | 3.81   | 2.01   | -0.16  | 0.72   | 2.46   | -0.09  | 0.88   | -1.20  | 0.00   | 1.21   | -0.48  | -0.72  | 1.42   | 0.79   | 1.32   | 0.19   | 0.07   | 1.81   | -0.37  | -0.70  | -4.91  | 0.78   | 0.18   | -0.38  |       |
| 8.42   | 7.76   | 6.45   | 8.85   | 7.83   | 7.61   | 4.78   | 6.72   | 7.19   | 7.37   | 6.77   | 7.87   | 8.65   | 0.78   | 4.79   | -2.20  | -6.51  | -0.56  | 0.96   | -6.33  | -2.68  | 4.68   | -1.20  | -12.00 | -10.36 | -5.56  | -4.89  | -6.51  |       |
| 7.73   | 8.48   | 7.45   | 9.64   | 7.25   | 7.73   | 7.30   | 8.09   | 6.96   | 7.56   | 7.70   | 8.84   | 9.15   | 1.17   | 4.69   | -3.31  | -11.56 | -1.06  | 0.47   | -5.76  | -0.01  | 5.01   | 0.76   | -11.72 | -10.42 | -3.68  | -5.58  | -7.74  |       |
| -25.23 | -25.17 | -24.31 | -22.16 | -26.19 | -17.94 | -14.76 | -21.70 | -26.43 | -24.49 | -22.41 | -24.76 | -23.30 | -15.85 | -5.04  | -15.77 | -20.21 | -22.03 | -15.28 | -19.63 | -17.79 | -9.82  | -15.78 | -24.97 | -31.07 | -23.14 | -18.32 | -20.74 |       |
| -8.66  | -8.54  | -10.72 | -6.28  | -14.30 | -7.21  | -8.52  | -7.57  | -10.19 | -9.19  | -8.41  | -9.47  | -8.99  | -0.27  | 2.87   | -0.47  | 1.22   | -1.50  | -0.55  | 0.57   | -1.72  | -2.29  | -1.72  | 2.63   | 2.19   | 0.26   | -1.53  | 1.18   |       |
| -13.75 | -17.41 | -21.31 | -11.86 | -22.49 | -15.62 | -17.79 | -13.40 | -14.80 | -12.85 | -14.38 | -15.57 | -15.40 | -0.08  | -0.69  | 0.01   | 0.43   | -2.23  | 0.95   | 2.19   | -0.99  | -3.03  | 0.20   | 2.31   | -1.17  | -0.29  | -1.03  | 0.92   |       |
| -0.35  | -1.07  | -2.27  | -0.20  | 1.02   | 1.71   | 1.54   | 1.94   | 0.65   | -1.00  | 2.83   | 0.74   | 1.25   | 3.28   | 4.02   | 1.62   | -1.52  | 2.30   | 1.32   | 5.08   | 1.78   | 1.29   | 1.02   | -0.62  | -2.47  | -2.55  | -0.65  | 3.36   | -3.70 |
| -25.39 | -28.63 | -31.79 | -28.59 | -29.14 | -19.09 | -19.97 | -24.05 | -25.57 | -26.99 | -24.78 | -28.58 | -25.67 | -22.62 | -24.88 | -25.61 | -27.83 | -29.94 | -28.65 | -29.54 | -22.72 | -23.86 | -28.92 | -26.37 | -24.73 | -28.83 | -27.88 | -29.01 |       |
| 2.30   | 2.56   | 3.31   | 3.85   | 3.72   | 1.45   | 1.84   | 1.46   | 1.30   | 2.21   | 3.03   | 2.85   | 3.09   | 1.82   | 2.17   | 3.22   | 2.20   | 3.63   | 2.53   | 4.13   | 2.18   | 1.87   | 2.30   | 2.17   | 2.17   | 2.77   | 2.22   | 3.11   |       |
| 7.59   | 5.58   | 6.90   | 7.56   | 8.53   | 2.56   | 5.22   | 6.43   | 2.68   | 4.23   | 4.37   | 4.40   | 4.06   | 3.51   | 4.57   | 3.11   | 3.54   | 7.52   | 4.16   | 6.55   | 2.39   | 5.38   | 1.00   | 3.43   | 4.69   | 5.03   | 4.40   | 4.01   |       |
| -1.17  | 1.82   | 1.84   | 0.31   | 1.87   | -0.30  | -0.30  | -0.22  | -0.47  | -0.79  | -0.89  | -1.48  | -0.87  | -0.62  | -0.21  | -0.39  | 1.56   | 1.50   | -0.69  | 0.48   | 0.35   | 0.78   | -0.42  | -0.28  | 0.68   | -0.49  | -0.55  | -0.84  |       |
| 0.30   | 0.19   | 0.79   | -0.56  | 0.82   | 0.35   | -0.33  | -0.28  | -1.40  | 0.32   | 0.25   | -1.12  | -0.77  | -1.11  | -0.37  | -1.75  | 0.90   | -0.77  | -0.64  | -0.34  | -1.12  | -0.69  | -1.27  | -1.62  | 0.44   | -0.99  | -0.88  | 0.09   |       |
| 3.21   | 2.00   | 2.29   | 3.93   | 3.56   | -0.59  | 1.14   | 0.32   | 1.62   | 0.45   | 0.74   | 2.84   | -0.12  | 1.35   | 2.17   | -0.53  | 2.67   | 2.70   | 2.16   | 1.99   | 0.83   | 2.36   | 1.79   | 3.94   | 1.62   | 0.51   | 0.28   | 0.75   |       |
| -31.85 | -9.12  | -23.09 | -19.21 | -19.03 | -14.19 | -33.08 | -10.70 | -21.74 | -20.04 | -25.03 | -36.01 | -28.12 | -22.71 | -24.38 | -28.51 | 1.80   | 4.12   | -13.10 | -22.57 | -42.40 | -31.57 | -22.91 | -8.34  | -10.21 | -21.70 | -22.57 | -7.51  |       |
| -45.17 | -17.82 | -35.11 | -29.46 | -26.61 | -23.78 | -46.46 | -22.33 | -31.44 | -28.33 | -36.58 | -53.93 | -38.32 | -35.64 | -38.62 | -39.93 | -11.81 | -1.64  | -18.97 | -33.00 | -55.05 | -42.03 | -35.13 | -19.94 | -18.72 | -28.14 | -34.58 | -20.94 |       |
| -61.66 | -28.63 | -51.94 | -39.69 | -40.29 | -37.70 | -67.37 | -36.79 | -47.27 | -43.96 | -55.78 | -75.39 | -57.65 | -49.20 | -51.41 | -51.17 | -28.18 | -13.35 | -27.43 | -47.05 | -54.70 | -44.30 | -30.79 | -29.19 | -33.56 | -44.58 | -36.18 | -30.18 |       |
| 5.22   | 5.29   | 5.86   | 5.25   | 6.78   | 5.24   | 4.63   | 2.79   | 5.23   | 3.02   | 5.43   | 5.08   | 4.20   | 1.12   | 5.61   | 0.40   | -6.50  | -2.59  | -1.38  | -3.85  | 2.61   | 5.14   | -0.78  | -7.83  | -8.62  | -5.98  | -2.31  | -8.66  |       |
| 6.48   | 5.17   | 5.99   | 6.29   | 5.48   | 6.37   | 7.07   | 5.20   | 3.53   | 3.51   | 5.34   | 7.07   | 5.28   | -0.62  | 5.69   | -0.53  | -10.53 | -5.22  | -3.52  | -7.62  | 1.37   | 4.91   | -0.72  | -10.80 | -9.77  | -8.98  | -4.34  | -11.32 |       |
| -13.21 | -12.97 | -13.17 | -15.48 | -15.50 | -13.80 | -17.12 | -12.65 | -13.67 | -12.61 | -11.83 | -14.73 | -12.36 | -14.76 | -17.94 | -15.83 | -12.62 | -15.98 | -13.59 | -12.62 | -17.12 | -15.58 | -16.01 | -17.38 | -17.38 | -13.15 | -17.06 | -17.86 |       |
| 5.09   | 6.23   | 7.75   | 4.80   | 8.39   | 3.15   | 4.94   | 3.42   | 2.44   | 1.21   | 2.94   | 3.77   | 2.32   | 0.08   | 3.97   | 1.94   | 0.81   | 2.83   | 2.74   | -0.21  | 0.68   | 2.49   | 0.32   | -1.26  | 1.21   | 0.34   | -0.65  | -1.72  |       |
| 38.50  | 52.95  | 44.76  | 40.07  | 45.83  | 45.30  | 40.85  | 45.46  | 38.61  | 35.81  | 44.36  | 40.79  | 47.61  | 15.70  | 10.56  | 6.87   | -3.07  | 19.05  | 14.91  | 1.41   | 15.30  | 16.51  | 9.77   | 4.37   | 3.56   | 20.70  | 6.46   | -3.02  |       |
| -0.23  | 0.00   | 3.29   | 2.58   | 2.50   | 3.44   | -1.82  | 1.31   | 0.78   | 0.94   | -3.54  | 1.24   | -0.78  | 1.27   | 1.85   | -3.37  | -6.99  | -6.21  | 0.89   | -3.46  | 2.10   | 1.66   | 0.46   | -3.30  | -5.66  | 2.64   | 0.53   | -2.45  |       |
| -2.94  | -1.76  | -2.55  | -0.94  | -2.06  | -1.17  | -1.93  | -1.67  | -1.73  | -1.19  | -1.05  | -1.20  | -2.38  | -1.27  | -0.07  | -0.39  | 1.40   | 0.08   | 1.18   | 2.36   | -0.35  | -0.88  | -0.49  | 2.80   | 1.16   | 1.38   | -0.30  | 2.74   |       |
| -3.51  | -3.35  | -3.35  | -1.63  | -2.93  | -3.30  | -2.27  | -0.88  | -2.46  | -3.01  | -1.57  | -4.20  | -2.42  | -1.16  | -1.84  | -0.69  | 1.66   | 0.24   | 0.06   | 2.07   | -1.63  | -1.46  | -0.58  | 2.41   | 1.56   | 0.77   | -0.19  | 0.78   |       |
| -1.19  | -0.23  | 0.18   | -1.93  | 0.86   | -0.14  | -2.51  | 0.20   | -1.41  | -1.86  | -0.27  | -3.26  | -1.27  | -0.21  | -1.01  | 0.54   | 2.42   | 1.72   | 1.64   | 4.03   | 1.05   | -0.56  | 0.90   | 1.57   | 3.06   | 1.23   | 0.49   | 0.51   |       |
| 7.92   | 7.84   | 4.25   | 3.65   | 10.94  | 1.40   | 0.55   | 3.30   | 6.18   | 4.18   | 3.51   | 1.21   | 3.78   | 6.61   | 4.10   | 6.81   | 8.39   | 7.74   | 4.97   | 5.63   | 6.68   | 3.67   | 5.46   | 5.45   | 8.55   | 6.14   | 7.16   | 5.73   |       |
| 17.17  | 14.68  | 9.32   | 7.78   | 17.12  | 4.54   | 3.74   | 6.04   | 13.63  | 15.38  | 9.61   | 11.66  | 11.14  | 15.83  | 6.52   | 13.59  | 22.42  | 17.16  | 15.00  | 9.88   | 12.24  | 7.91   | 15.64  | 15.70  | 21.11  | 14.33  | 18.48  | 16.52  |       |
| 0.12   | -0.88  | -2.57  | -0.37  | -3.26  | -0.69  | -0.50  | -3.24  | -1.77  | -4.34  | -3.18  | -1.76  | -2.95  | -2.65  | -0.57  | -5.38  | -11.86 | -7.62  | -4.73  | -3.30  | -4.20  | -2.89  | -6.88  | -17.19 | -21.23 | -7.34  | -9.68  | -14.30 |       |
| -0.75  | 1.46   | 1.61   | 0.46   | 1.66   | -0.36  | 0.92   | -0.35  | -1.08  | 0.98   | 0.31   | 0.07   | 0.22   | 0.08   | 0.11   | -2.04  | 0.90   | 3.05   | 0.61   | 0.14   | 2.01   | -0.03  | 1.79   | 0.01   | 2.83   | 0.94   | -0.55  | 1.14   |       |
| -2.56  | -3.52  | -2.15  | 0.10   | -2.41  | -1.99  | -1.97  | -2.07  | -1.69  | -2.29  | -3.10  | -2.34  | -3.21  | -1.57  | -0.86  | -2.72  | -0.19  | -0.51  | -1.18  | -1.63  | -1.82  | -1.46  | -2.75  | -2.07  | -2.06  | -2.68  | -2.43  | -2.37  |       |
| -11.40 | -9.23  | -11.92 | -5.37  | -9.90  | -7.43  | -5.48  | -8.75  | -9.54  | -8.18  | -9.98  | -11.14 | -10.65 | -6.22  | -5.75  | -10.21 | -8.40  | -3.49  | -5.16  | -8.27  | -8.12  | -6.78  | -6.15  | -4.94  | -8.62  | -6.48  | -6.68  | -8.37  |       |
| 12.42  | 10.10  | 10.87  | 12.06  | 11.36  | 11.43  | 14.58  | 11.28  | 10.88  | 10.32  | 10.90  | 13.71  | 11.57  | 7.04   | 13.38  | 4.63   | -8.36  | -0.71  | 3.07   | 0.89   | 6.31   | 13.88  | 4.47   | -6.21  | -2.19  | -3.27  | 1.18   | -1.17  |       |
| 15.35  | 10.57  | 11.83  | 14.77  | 10.99  | 11.76  | 13.23  | 9.21   | 11.15  | 10.75  | 11.47  | 14.00  | 11.87  | 6.42   | 11.34  | 3.43   | -11.45 | -1.63  | 3.85   | 0.37   | 5.41   | 12.54  | 5.92   | -7.97  | -2.23  | -4.91  | 2.88   | -2.12  |       |
| -5.14  | -5.86  | -4.77  | -7.69  | -3.94  | -7.84  | -10.19 | -6.66  | -5.81  | -6.10  | -6.58  | -5.63  | -8.26  | -8.43  | -8.21  | -6.80  | -8.86  | -8.09  | -7.58  | -5.23  | -6.02  | -6.68  | -6.52  | -7.29  | -8.75  | -7.93  | -9.33  | -8.35  |       |
| 1.23   | 2.03   | 1.71   | -0.72  | 3.01   | -0.69  | -0.13  | -0.37  | -1.16  | 0.53   | -0.23  | -0.28  | -0.28  | -0.67  | 0.84   | -2.45  | -1.74  | 2.32   | 0.65   | 0.41   | -1.20  | 1.23   | -0.48  | -0.59  | 1.11   | -0.61  | -1.92  | -1.35  |       |
| 1.13   | 0.24   | -0.30  | 0.06   | 0.35   | -0.07  | 0.02   | -0.43  | -1.04  | -0.10  | 0.10   | -1.55  | -0.20  | -0.76  | -2.08  | -2.79  | -4.26  | 1.00   | 1.17   | -0.17  | -2.74  | -1.93  | 0.46   | -2.07  | -0.68  | -0.86  | -1.06  | -2.16  |       |
| 0.76   | 2.74   | 4.14   | 3.76   | 1.96   | 3.03   | -0.51  | 2.01   | 2.43   | 1.46   | 1.00   | 1.74   | 1.95   | 2.17   | 1.25   | 2.36   | -2.61  | 2.16   | 1.73   | 2.42   | 2.46   | 3.21   | 2.34   | 2.32   | 3.16   | 1.35   | 2.32   | 3.14   |       |
| 17.64  | 21.40  | 21.66  | 15.57  | 21.86  | 13.59  | 14.41  | 15.79  | 14.39  | 15.23  | 15.60  | 14.30  | 15.46  | 5.46   | 8.74   | 5.52   | 5.42   | 13.90  | 11.15  | 6.00   | 5.74   | 6.66   | 4.31   | 2.12   | 7.09   | 2.25   | 7.30   | 5.02   |       |
| 44.10  | 38.02  | 38.92  | 36.01  | 39.92  | 38.04  | 31.07  | 39.10  | 34.60  | 35.71  | 42.86  | 40.63  | 45.92  | 13.85  | 12.73  | 5.64   | -3.65  | 7.81   | 20.39  | 1.09   | 14.13  | 16.08  | 5.53   | -7.54  |        |        |        |        |       |

|        |        |        |        |        |        |        |        |        |        |        |        |        |        |        |        |        |        |        |        |        |        |        |        |        |        |        |        |
|--------|--------|--------|--------|--------|--------|--------|--------|--------|--------|--------|--------|--------|--------|--------|--------|--------|--------|--------|--------|--------|--------|--------|--------|--------|--------|--------|--------|
| 1.29   | 2.64   | 1.49   | 1.17   | 1.01   | 0.92   | -0.21  | 0.67   | 0.01   | -0.21  | -1.84  | -0.41  | 0.06   | -0.13  | 1.69   | -1.59  | 0.89   | 0.96   | -1.75  | -0.56  | -2.79  | -0.06  | -2.15  | -2.69  | -3.54  | -0.41  | 0.05   | -2.13  |
| 0.45   | 1.28   | 1.67   | -0.62  | 1.07   | -1.35  | -0.62  | -0.47  | -0.94  | -0.69  | 0.15   | -1.46  | -0.60  | -0.82  | -1.73  | -1.90  | 1.09   | 0.88   | 0.47   | -1.68  | -1.13  | -1.05  | -0.77  | 0.18   | 3.08   | 0.44   | 0.67   | -1.06  |
| 1.96   | 3.91   | 3.66   | 2.81   | 0.75   | 2.30   | 0.62   | 1.97   | 2.98   | 2.38   | 3.03   | 2.00   | 1.79   | 4.43   | 2.43   | 3.43   | 4.66   | 4.66   | 3.81   | 2.17   | 2.93   | 2.10   | 3.57   | 7.63   | 10.49  | 4.21   | 2.79   | 3.56   |
| -0.28  | 2.29   | 1.04   | -0.67  | -1.17  | -5.86  | -4.28  | -1.94  | -1.97  | -0.81  | -3.46  | -2.72  | -3.96  | -2.17  | -1.96  | -1.97  | 1.20   | 0.99   | 1.28   | -0.62  | -3.00  | -1.72  | -2.92  | -3.71  | -1.99  | -1.26  | -3.39  | -0.95  |
| 3.63   | 3.63   | 4.18   | 3.39   | 3.29   | 3.31   | 2.12   | 2.74   | 1.90   | 1.38   | 3.03   | 2.12   | 2.77   | 1.98   | 2.40   | 2.87   | 4.66   | 5.50   | 3.55   | 3.50   | 2.75   | 2.17   | 3.59   | 0.12   | 4.12   | 4.17   | 3.70   | 4.20   |
| 0.16   | 1.67   | 2.99   | 0.32   | 1.69   | 1.79   | 0.10   | 1.62   | 2.06   | 1.03   | 0.61   | 0.77   | 2.09   | 4.03   | 0.00   | -1.23  | 1.64   | 0.88   | 0.94   | 0.83   | 1.12   | 1.52   | 0.27   | -3.92  | -3.30  | 1.19   | 0.85   | 0.88   |
| 8.32   | 8.64   | 7.44   | 9.72   | 7.96   | 7.65   | 4.57   | 7.21   | 7.54   | 6.86   | 7.77   | 8.25   | 8.26   | 0.75   | 4.33   | -2.31  | -6.30  | -0.12  | 1.56   | -5.70  | -1.62  | 4.48   | -1.23  | -15.36 | -10.60 | -4.28  | -2.92  | -3.74  |
| 8.40   | 8.70   | 8.14   | 9.80   | 7.72   | 8.79   | 7.59   | 8.59   | 8.15   | 8.14   | 8.31   | 9.09   | 9.43   | 0.96   | 5.40   | -2.58  | -11.26 | -0.26  | 1.24   | -5.68  | 0.99   | 4.96   | 0.67   | -15.07 | -10.29 | -2.71  | -5.66  | -5.69  |
| -25.29 | -24.58 | -23.94 | -20.27 | -25.16 | -19.91 | -17.99 | -21.76 | -23.47 | -24.51 | -22.09 | -24.47 | -25.01 | -17.54 | -7.85  | -18.08 | -21.42 | -25.19 | -17.81 | -19.92 | -21.09 | -11.70 | -17.97 | -32.49 | -35.30 | -23.11 | -19.92 | -20.34 |
| -8.63  | -7.99  | -11.42 | -7.34  | -14.12 | -7.99  | -8.92  | -7.49  | -11.04 | -8.12  | -8.46  | -9.30  | -8.25  | -0.27  | 1.06   | 0.23   | 0.41   | -2.45  | -2.81  | 1.40   | -2.31  | -3.12  | -2.81  | 1.94   | 0.74   | -0.54  | -1.54  | 0.43   |
| -14.45 | -17.68 | -20.34 | -11.93 | -22.76 | -17.44 | -18.30 | -14.59 | -14.60 | -13.15 | -15.38 | -19.36 | -15.86 | -1.34  | -2.70  | 1.30   | -1.21  | -3.51  | -1.21  | 1.18   | -3.49  | -4.14  | -1.17  | 1.97   | -2.14  | -0.96  | -2.85  | 0.32   |
| 1.29   | 0.85   | -2.10  | -0.14  | 2.26   | 2.46   | 1.48   | 3.36   | 0.81   | -0.98  | 2.10   | 0.29   | 2.43   | 1.09   | 2.28   | 1.46   | -0.47  | 1.68   | 0.79   | 2.99   | 1.93   | 3.08   | -1.47  | -3.52  | -3.73  | 0.93   | 3.37   | -5.66  |
| -25.47 | -29.53 | -33.68 | -29.58 | -31.88 | -19.98 | -20.34 | -24.59 | -25.93 | -28.09 | -25.19 | -29.66 | -26.58 | -23.77 | -28.16 | -26.67 | -28.81 | -32.31 | -30.61 | -31.25 | -23.96 | -24.63 | -29.88 | -27.44 | -25.92 | -29.65 | -30.12 | -31.23 |
| 3.17   | 2.78   | 4.09   | 4.43   | 4.10   | 2.21   | 1.40   | 1.92   | 1.60   | 2.58   | 3.44   | 3.28   | 3.70   | 2.52   | 2.86   | 3.93   | 1.86   | 4.26   | 2.99   | 3.38   | 2.57   | 1.39   | 2.35   | 2.21   | 1.90   | 2.88   | 2.58   | 3.03   |
| 6.85   | 5.61   | 7.22   | 8.32   | 8.39   | 4.55   | 5.92   | 5.48   | 2.64   | 4.52   | 4.68   | 4.90   | 5.99   | 5.62   | 4.04   | 4.80   | 4.93   | 6.92   | 4.71   | 4.93   | 3.17   | 5.61   | 2.17   | 3.93   | 4.55   | 4.45   | 2.99   | 6.11   |
| -0.54  | 1.93   | 0.79   | 0.66   | 1.03   | -0.29  | -0.04  | -0.24  | -0.75  | -1.64  | 0.38   | -1.88  | -0.92  | -0.07  | -1.25  | -0.25  | 0.61   | 1.21   | 0.64   | 1.28   | 0.02   | -0.48  | 0.05   | 0.19   | -0.28  | -0.85  | -0.87  | -0.70  |
| 0.16   | 0.05   | 1.49   | -0.26  | 0.49   | 0.06   | -1.34  | -0.17  | -1.25  | 0.47   | 0.23   | -0.01  | -0.08  | -0.73  | -0.80  | -1.73  | 0.14   | -0.23  | 0.19   | -1.06  | -0.88  | -0.13  | -1.74  | -1.25  | -0.43  | -0.45  | -0.24  | -0.08  |
| 3.34   | 1.57   | 1.96   | 2.99   | 2.80   | 0.65   | 1.41   | 1.43   | 1.62   | 1.71   | 1.66   | 1.81   | 1.02   | 2.26   | 2.43   | 0.71   | 3.06   | 2.89   | 2.26   | 1.50   | 3.00   | 2.31   | 1.82   | 4.70   | 1.40   | 0.43   | 0.66   | 2.20   |
| -48.93 | -18.47 | -36.75 | -28.50 | -24.72 | -23.35 | -48.22 | -19.85 | -30.89 | -27.34 | -38.05 | -49.65 | -43.41 | -24.46 | -26.17 | -29.52 | 2.38   | 2.39   | -12.60 | -21.86 | -43.42 | -31.70 | -23.96 | -7.28  | -11.26 | -21.38 | -23.36 | -6.90  |
| -62.37 | -29.23 | -50.96 | -41.06 | -36.48 | -37.39 | -63.93 | -34.91 | -43.52 | -39.48 | -52.68 | -68.64 | -57.58 | -36.88 | -39.79 | -40.98 | -12.34 | -2.10  | -19.32 | -33.90 | -56.28 | -42.83 | -36.09 | -19.82 | -20.22 | -27.04 | -34.37 | -20.26 |
| -81.30 | -43.61 | -67.63 | -54.90 | -51.35 | -54.44 | -83.81 | -52.44 | -61.43 | -56.05 | -73.01 | -90.86 | -77.33 | -49.92 | -53.70 | -51.90 | -27.63 | -14.35 | -27.32 | -45.87 | -72.23 | -54.71 | -46.06 | -30.17 | -29.78 | -31.78 | -46.38 | -35.88 |
| 5.20   | 5.26   | 6.83   | 4.99   | 5.88   | 5.01   | 5.55   | 3.70   | 4.10   | 3.20   | 4.47   | 4.46   | 4.60   | 1.56   | 5.96   | 0.99   | -6.54  | -2.22  | -1.13  | -4.04  | 2.50   | 4.35   | -0.52  | -7.75  | -8.64  | -6.24  | -2.44  | -8.19  |
| 6.76   | 5.04   | 6.07   | 6.47   | 5.59   | 5.85   | 6.28   | 5.27   | 4.63   | 3.55   | 5.11   | 7.25   | 5.11   | 0.62   | 5.69   | 0.03   | -11.02 | -4.58  | -2.97  | -8.22  | 2.03   | 5.43   | -2.52  | -10.70 | -9.78  | -8.83  | -3.86  | -10.29 |
| -13.12 | -12.44 | -12.34 | -15.14 | -13.82 | -13.73 | -15.69 | -12.26 | -12.56 | -12.42 | -12.10 | -15.04 | -12.80 | -14.77 | -17.98 | -16.96 | -12.82 | -15.30 | -14.65 | -13.25 | -21.37 | -16.06 | -14.50 | -16.69 | -16.91 | -15.69 | -18.20 | -18.25 |
| 5.42   | 7.02   | 7.71   | 4.99   | 6.97   | 3.30   | 5.42   | 3.79   | 2.39   | 1.76   | 2.95   | 3.11   | 2.87   | 1.70   | 3.47   | 2.72   | -0.15  | 3.03   | 1.72   | 0.97   | 0.67   | 1.90   | 0.07   | -1.48  | 0.17   | 0.59   | 0.37   | -0.94  |
| 39.01  | 54.05  | 45.74  | 40.49  | 46.90  | 46.26  | 41.52  | 47.63  | 40.48  | 37.53  | 46.59  | 42.20  | 48.38  | 19.18  | 11.92  | 10.17  | -0.57  | 23.49  | 19.27  | 3.29   | 18.79  | 18.50  | 12.92  | 6.78   | 6.84   | 20.86  | 8.28   | 2.66   |
| -0.65  | 0.46   | 2.20   | 2.61   | 1.81   | 2.59   | -0.24  | 0.94   | -0.03  | 0.10   | -3.76  | 1.44   | -0.06  | 1.61   | 0.41   | -1.58  | -6.94  | -7.57  | 2.30   | -5.73  | 2.78   | 2.29   | 0.10   | -2.61  | -2.69  | 1.98   | 0.50   | -1.15  |
| -3.01  | -1.93  | -2.49  | -0.84  | -3.05  | -1.83  | -1.89  | -0.72  | -2.26  | -0.69  | -1.49  | -1.60  | -2.02  | -1.62  | -0.95  | -0.93  | 1.09   | -0.37  | 1.13   | 1.29   | -0.30  | -0.43  | -0.02  | 2.28   | 0.85   | 1.08   | -0.20  | 2.69   |
| -3.37  | -2.70  | -3.42  | -1.57  | -2.60  | -3.26  | -2.63  | -1.65  | -2.08  | -2.87  | -1.52  | -3.37  | -2.36  | -1.55  | -2.11  | -0.31  | 1.16   | 0.23   | 0.19   | 0.45   | -1.48  | -1.82  | -0.21  | 2.52   | 0.69   | 0.68   | -0.69  | 0.72   |
| -2.40  | -0.12  | 0.88   | -1.94  | 1.53   | -1.16  | -3.72  | 0.86   | -0.98  | -0.45  | -0.34  | -1.66  | -1.42  | 0.54   | -0.92  | -0.14  | 0.83   | 0.33   | 1.51   | 3.92   | -0.47  | 1.19   | 1.08   | 1.59   | 1.62   | 0.64   | -0.53  | 1.61   |
| 7.83   | 8.54   | 5.10   | 3.58   | 10.35  | 0.51   | -0.33  | 2.86   | 5.54   | 4.13   | 4.03   | 1.59   | 4.08   | 6.92   | 4.98   | 7.66   | 7.99   | 7.42   | 5.01   | 5.53   | 5.06   | 3.65   | 5.94   | 6.50   | 8.87   | 7.19   | 7.95   | 4.94   |
| 17.49  | 15.03  | 8.59   | 7.29   | 17.05  | 3.96   | 3.82   | 6.43   | 14.05  | 15.29  | 9.97   | 11.65  | 10.77  | 17.01  | 5.95   | 13.92  | 23.55  | 17.58  | 15.34  | 10.40  | 12.91  | 8.14   | 15.58  | 16.19  | 21.07  | 14.74  | 18.34  | 17.68  |
| -0.28  | -0.96  | -3.30  | 0.00   | -3.25  | -0.56  | -0.11  | -2.88  | -0.47  | -3.15  | -2.89  | -3.57  | -2.27  | -2.63  | -1.37  | -5.02  | -12.19 | -8.22  | -4.54  | -3.06  | -5.18  | -2.32  | -6.78  | -16.88 | -21.86 | -7.32  | -9.12  | -14.21 |
| -2.04  | 1.85   | 0.64   | 1.34   | 3.36   | -0.54  | 0.08   | -0.28  | -1.62  | -3.07  | 0.87   | -0.75  | -0.06  | 0.21   | -0.07  | -1.90  | 0.44   | 2.79   | -1.03  | 0.47   | 0.85   | 0.35   | -0.07  | 0.45   | 1.30   | 1.17   | 1.03   | 0.83   |
| -3.21  | -4.23  | -3.52  | -1.92  | -1.24  | -2.80  | -2.82  | -2.41  | -2.08  | -2.08  | -4.36  | -3.02  | -3.18  | -1.47  | -0.73  | -2.70  | -0.46  | -1.10  | -1.02  | -2.68  | -2.75  | -0.65  | -2.22  | -1.52  | -1.32  | -2.59  | -2.39  | -2.45  |
| -14.75 | -11.74 | -13.94 | -6.06  | -12.51 | -10.52 | -8.19  | -10.33 | -12.37 | -11.23 | -11.67 | -14.03 | -12.28 | -5.68  | -6.14  | -10.41 | -8.86  | -3.63  | -5.38  | -7.50  | -7.51  | -6.82  | -6.86  | -4.28  | -9.80  | -5.78  | -7.24  | -6.96  |
| 11.45  | 9.28   | 10.40  | 11.24  | 11.89  | 10.61  | 14.53  | 10.42  | 9.99   | 9.51   | 11.08  | 13.45  | 11.49  | 7.51   | 14.65  | 4.25   | -9.27  | 0.25   | 4.63   | 2.07   | 7.19   | 14.68  | 5.37   | -5.40  | -0.72  | -4.76  | 3.30   | -0.32  |
| 14.25  | 10.09  | 11.63  | 14.35  | 10.29  | 11.39  | 12.96  | 9.22   | 9.34   | 9.87   | 11.19  | 13.06  | 12.47  | 8.10   | 11.71  | 2.74   | -11.80 | -1.18  | 3.97   | 0.04   | 5.59   | 13.10  | 6.82   | -8.81  | -2.20  | -5.33  | 3.90   | -1.58  |
| -5.88  | -5.35  | -4.41  | -6.83  | -4.72  | -7.50  | -8.37  | -6.56  | -6.50  | -6.94  | -5.92  | -5.98  | -7.76  | -7.58  | -8.00  | -6.68  | -8.68  | -8.06  | -1.84  | -5.47  | -5.12  | -8.39  | -6.52  | -5.88  | -9.93  | -9.14  | -9.18  | -8.80  |
| 2.10   | 3.14   | 2.91   | -0.43  | 2.43   | -0.58  | -0.18  | -0.38  | -0.79  | 0.73   | 0.12   | 0.19   | -0.24  | 0.09   | 0.06   | -2.18  | -2.54  | 1.74   | -0.13  | 0.50   | -1.09  | 1.54   | -0.69  | -0.74  | 0.66   | -1.14  | -3.03  | -1.42  |
| 1.75   | 0.37   | 0.59   | 0.41   | 0.53   | -0.63  | -0.32  | 0.19   | -0.70  | 0.44   | 0.39   | -1.00  | 0.86   | -0.92  | -2.02  | -3.05  | -3.64  | 1.29   | 0.38   | -1.03  | -2.12  | -1.63  | 0.34   | -0.21  | -1.39  | -1.06  | -1.23  | -2.55  |
| 1.09   | 2.50   | 4.20   | 2.45   | 2.46   | 3.01   | 0.58   | 2.05   | 4.00   | 2.99   | 1.39   | 1.25   | 1.45   | 2.24   | 0.44   | 2.01   | -3.04  | 2.32   | 1.60   | 3.34   | 2.93   | 3.49   | 1.90   | 2.76   | 2.33   | 2.36   | 2.62   | 3.16   |
| 17.33  | 22.31  | 22.57  | 16.68  | 23.02  | -13.40 | 14.21  | 17.08  | 14.67  | 17.29  | 16.10  | 14.03  | 16.61  | 9.94   | 9.36   | 6.96   | 8.21   | 15.53  | 12.13  | 7.79   | 7.29   | 7.66   | 4.87   | 1.80   | 8.88   | 2.46   | 5.65   | 6.94   |
| 41.92  | 39.90  | 40.69  | 36.28  | 41.12  | 38.65  | 31.48  | 40.63  | 35.91  | 39.30  | 44.48  | 41.60  | 48.12  | 15.71  | 15.02  | 8.62   | -2.45  | 10.50  | 23.88  | 3.35   | 17.04  | 17.88  | 7.35   | -6.73  | -1.17  | -4.63  | 4.97   | -5.25  |
| -15.40 | -19.15 | -17.15 | -15.73 | -17.45 | -20.61 | -19.81 | -21.23 | -16.19 | -17.12 | -21.76 | -15.58 | -22.36 | -9.76  | -7.16  | -14.55 | -18.24 | -18.45 | -9.47  | -13.61 | -11.62 | -6.25  | -15.25 | -24.53 | -23.09 | -22.97 | -16.05 | -21.17 |
| -54.24 | -28.74 | -41.57 | -33.98 | -25.01 | -26.32 | -44.71 | -25.26 | -30.73 | -31.66 | -38.99 | -49.30 | -40.25 | -30.91 | -35.62 | -17.51 | -24.95 | -13.75 | -25.10 | -20.27 | -41.96 | -34.07 | -24.62 | -27.92 | -16.81 | -23.25 | -24.49 | -23.49 |
| -69.68 | -63.57 | -55.82 | -44.18 | -36.45 | -38.64 | -60.05 | -37.40 | -41.19 | -43.90 | -52.50 | -68.65 | -52.56 | -41.92 | -48.53 | -29.41 | -33.   |        |        |        |        |        |        |        |        |        |        |        |

|         |        |        |        |        |        |        |        |        |        |        |         |        |        |        |        |        |        |        |        |        |        |        |        |        |        |        |        |
|---------|--------|--------|--------|--------|--------|--------|--------|--------|--------|--------|---------|--------|--------|--------|--------|--------|--------|--------|--------|--------|--------|--------|--------|--------|--------|--------|--------|
| -0.17   | 1.91   | 1.51   | -0.79  | -0.57  | -5.28  | -5.19  | -1.38  | -1.34  | -0.43  | -2.51  | -3.23   | -3.28  | -2.43  | -2.13  | -2.32  | 2.90   | 1.79   | -1.39  | 0.45   | -3.27  | -2.81  | -2.78  | -5.62  | -2.71  | -1.50  | -2.66  | -1.00  |
| 3.43    | 3.83   | 3.79   | 3.11   | 3.78   | 3.69   | 3.26   | 3.29   | 1.57   | 1.59   | 3.06   | 2.62    | 2.97   | 1.90   | 2.65   | 3.08   | 5.09   | 4.98   | 4.06   | 4.33   | 2.19   | 3.33   | 3.10   | 0.77   | 3.85   | 4.03   | 3.55   | 4.28   |
| 0.11    | 2.25   | 2.57   | 0.38   | 2.00   | 0.61   | 0.55   | 1.83   | 3.05   | 1.33   | 1.38   | -0.79   | 1.06   | -0.84  | 0.47   | -0.90  | 0.94   | 2.98   | 1.27   | 0.28   | 2.07   | 1.20   | 0.98   | -4.44  | -3.84  | 0.63   | -0.79  | 0.89   |
| 9.46    | 8.90   | 7.71   | 10.11  | 8.10   | 6.70   | 5.38   | 8.14   | 6.79   | 7.40   | 8.39   | 7.77    | 10.52  | 0.74   | 5.27   | -1.29  | -5.26  | 1.26   | 1.78   | -6.21  | -0.68  | 4.56   | -0.54  | -15.03 | -11.30 | -4.98  | -2.89  | -4.34  |
| 8.49    | 10.01  | 7.74   | 9.41   | 8.28   | 9.32   | 7.71   | 8.88   | 8.29   | 8.46   | 8.86   | 7.51    | 10.73  | 1.62   | 5.79   | -2.01  | -10.56 | 0.09   | 2.22   | -4.71  | 0.90   | 5.51   | 0.82   | -15.80 | -9.90  | -3.29  | -5.07  | -5.56  |
| -24.82  | -25.97 | -24.55 | -21.70 | -26.17 | -20.26 | -15.97 | -22.56 | -24.11 | -24.63 | -23.05 | -25.22  | -24.60 | -19.15 | -9.34  | -21.08 | -23.90 | -25.96 | -18.07 | -21.46 | -21.86 | -12.48 | -19.38 | -33.15 | -35.59 | -26.54 | -22.64 | -23.28 |
| -9.58   | -8.30  | -11.13 | -8.12  | -14.36 | -8.80  | -9.41  | -8.11  | -10.77 | -7.30  | -8.59  | -10.48  | -9.41  | -0.95  | 0.57   | -0.26  | 0.37   | -2.09  | -3.15  | 0.71   | -3.03  | -4.10  | -2.76  | 1.54   | 0.42   | -1.23  | -2.73  | -0.81  |
| -15.46  | -18.00 | -21.17 | -11.33 | -22.84 | -18.20 | -19.24 | -15.63 | -14.72 | -14.03 | -15.82 | -15.92  | -16.03 | -3.01  | -4.65  | -1.74  | -2.17  | -4.95  | -1.64  | 1.03   | -5.03  | -5.41  | -2.30  | 0.68   | -3.78  | -2.31  | -4.68  | -0.28  |
| 0.31    | 2.40   | -3.12  | 0.07   | 2.99   | 2.81   | 2.34   | 2.21   | -0.13  | -1.45  | 4.49   | 0.54    | 2.00   | 1.61   | 3.92   | 0.47   | 2.72   | 1.60   | 1.54   | 2.73   | 2.47   | 2.00   | -0.01  | -3.51  | -3.59  | 0.17   | 3.45   | -5.23  |
| -27.28  | -30.57 | -34.74 | -30.25 | -32.86 | -21.04 | -21.79 | -25.88 | -27.03 | -29.84 | -26.73 | -30.82  | -28.57 | -24.33 | -27.18 | -28.29 | -29.20 | -32.59 | -31.06 | -31.61 | -23.08 | -25.92 | -30.84 | -28.48 | -26.36 | -30.82 | -30.18 | -32.76 |
| 3.33    | 2.54   | 4.91   | 4.04   | 4.32   | 1.58   | 1.77   | 1.97   | 1.73   | 2.94   | 3.39   | 3.13    | 3.75   | 1.97   | 2.57   | 4.50   | 1.86   | 4.33   | 3.19   | 5.30   | 4.98   | 1.77   | 2.34   | 2.00   | 0.86   | 3.29   | 1.91   | 3.48   |
| 7.22    | 6.76   | 7.59   | 8.09   | 9.96   | 3.98   | 5.46   | 6.54   | 3.56   | 6.11   | 4.09   | 4.86    | 4.68   | 5.40   | 5.18   | 5.35   | 5.91   | 8.21   | 5.08   | 7.31   | 7.19   | 6.01   | 2.74   | 3.55   | 5.97   | 4.65   | 6.00   | 4.88   |
| -0.93   | 2.42   | 1.37   | 0.19   | 1.52   | 0.33   | -0.31  | -0.62  | -1.10  | -0.18  | 0.09   | -1.98   | -0.02  | -0.42  | -0.79  | -0.57  | 1.28   | 1.63   | 0.01   | 0.68   | 1.29   | -0.04  | 0.12   | 0.32   | 0.25   | -0.85  | -0.86  | -0.59  |
| -0.01   | 0.31   | 1.81   | 0.53   | 0.87   | -0.21  | -0.77  | 0.88   | -1.53  | 0.90   | 0.12   | -0.65   | -0.57  | -1.04  | -0.38  | -1.52  | 0.92   | 0.52   | 0.48   | -0.43  | -1.21  | -0.50  | -1.38  | -1.95  | -1.22  | -0.80  | -1.17  | 0.71   |
| 3.10    | 1.57   | 2.21   | 3.37   | 3.84   | 1.34   | 0.39   | 1.25   | 1.28   | 0.51   | 1.29   | 1.59    | 0.19   | 1.60   | 2.78   | 0.44   | 3.59   | 2.97   | 2.21   | 3.40   | -0.72  | 2.13   | 2.52   | 3.87   | 1.80   | 0.70   | 1.27   | 1.30   |
| -64.23  | -28.89 | -51.53 | -40.09 | -32.99 | -32.50 | -62.74 | -29.52 | -41.92 | -40.06 | -52.69 | -60.74  | -58.59 | -26.52 | -27.86 | -29.91 | 3.54   | 1.52   | -12.77 | -21.74 | -47.01 | -30.18 | -24.06 | -6.69  | -13.58 | -21.73 | -22.43 | -6.99  |
| -78.11  | -42.10 | -68.28 | -55.74 | -47.50 | -48.99 | -78.45 | -47.83 | -57.25 | -53.07 | -69.30 | -82.40  | -75.23 | -40.46 | -42.11 | -40.19 | -11.92 | -3.63  | -20.33 | -32.65 | -59.39 | -42.39 | -38.37 | -18.73 | -22.39 | -27.82 | -34.32 | -19.79 |
| -94.64  | -57.30 | -85.02 | -68.73 | -63.99 | -69.00 | -97.81 | -67.21 | -75.82 | -70.65 | -89.17 | -102.68 | -94.35 | -52.22 | -55.40 | -52.06 | -26.73 | -15.18 | -27.79 | -45.07 | -74.92 | -54.22 | -46.49 | -28.69 | -33.61 | -32.05 | -44.89 | -34.10 |
| 5.64    | 4.56   | 5.97   | 4.92   | 5.67   | 5.27   | 5.10   | 2.69   | 4.72   | 3.40   | 5.81   | 4.52    | 3.80   | 1.15   | 6.19   | 0.99   | -6.39  | -2.33  | -0.93  | -3.39  | 2.76   | 5.32   | -0.40  | -7.82  | -7.47  | -5.82  | -2.34  | -8.18  |
| 6.90    | 5.38   | 5.95   | 6.46   | 5.92   | 5.90   | 6.56   | 5.55   | 3.95   | 3.53   | 5.62   | 6.73    | 6.19   | 0.38   | 5.85   | 0.63   | -10.68 | -4.77  | -2.19  | -6.93  | 1.74   | 5.66   | -2.41  | -11.55 | -8.07  | -8.69  | -3.71  | -10.48 |
| -12.72  | -12.88 | -12.27 | -15.19 | -12.66 | -12.35 | -16.62 | -12.52 | -12.64 | -11.51 | -12.19 | -15.24  | -12.85 | -15.88 | -19.33 | -16.74 | -13.53 | -16.16 | -15.10 | -14.27 | -16.42 | -16.80 | -14.65 | -17.57 | -18.46 | -14.95 | -18.23 | -18.82 |
| 4.75    | 8.26   | 7.98   | 4.59   | 7.78   | 2.72   | 5.74   | 4.56   | 3.17   | 1.67   | 2.99   | 2.79    | 3.36   | 1.05   | 3.28   | 2.38   | 0.57   | 3.80   | 2.22   | 0.34   | 1.97   | 2.70   | 0.20   | 0.04   | 0.28   | 0.33   | 0.95   | -0.08  |
| 40.52   | 55.66  | 47.51  | 41.03  | 47.47  | 47.42  | 42.26  | 49.01  | 40.94  | 37.88  | 47.65  | 42.29   | 49.50  | 23.74  | 15.36  | 14.95  | 3.25   | 29.87  | 21.31  | 6.41   | 21.42  | 20.98  | 15.65  | 10.20  | 14.48  | 26.18  | 11.22  | 5.29   |
| -0.54   | -0.46  | 2.49   | 3.80   | 1.89   | 2.68   | 0.04   | 1.47   | 0.74   | 0.00   | -3.49  | 0.73    | -0.38  | 0.81   | 0.44   | -0.27  | -6.82  | -5.55  | 1.14   | -5.13  | 1.52   | 0.50   | 0.35   | -3.00  | -0.64  | 2.89   | 1.01   | -1.28  |
| -2.79   | -2.39  | -2.10  | -0.94  | -1.37  | -1.36  | -2.39  | -1.85  | -2.28  | -1.25  | -1.36  | -0.99   | -2.16  | -1.00  | -0.49  | -1.45  | 1.63   | 0.08   | 1.47   | 1.42   | -0.61  | -0.51  | -1.33  | 1.46   | 1.10   | 1.18   | -0.83  | 2.42   |
| -3.61   | -2.48  | -3.27  | -1.66  | -2.85  | -3.59  | -2.58  | -1.04  | -2.63  | -2.40  | -1.46  | -4.63   | -2.42  | -1.90  | -2.41  | -0.76  | 0.94   | 0.12   | -0.72  | 1.50   | -2.01  | -2.11  | -0.03  | 2.49   | 0.86   | 0.37   | -0.85  | 0.51   |
| -1.74   | -0.60  | -0.54  | -2.63  | 1.71   | 0.28   | -1.84  | 0.80   | -1.18  | -0.67  | -0.83  | -3.52   | -1.85  | 0.00   | -1.31  | 0.34   | 3.43   | 1.53   | 1.02   | 3.00   | 1.32   | -1.35  | 0.95   | 1.48   | 3.09   | 0.53   | -0.43  | 1.23   |
| 7.95    | 8.68   | 5.09   | 3.99   | 11.02  | 0.45   | 2.04   | 3.13   | 6.41   | 4.66   | 4.57   | 1.97    | 4.29   | 6.57   | 5.16   | 8.48   | 10.42  | 8.86   | 4.83   | 6.70   | 5.36   | 3.71   | 6.48   | 5.04   | 10.36  | 6.41   | 7.53   | 4.91   |
| 17.48   | 16.13  | 9.57   | 7.39   | 16.96  | 3.84   | 3.65   | 6.88   | 14.33  | 14.98  | 10.28  | 11.18   | 11.35  | 16.81  | 6.65   | 14.36  | 24.22  | 18.19  | 16.01  | 10.73  | 12.46  | 8.80   | 16.02  | 16.81  | 22.11  | 14.71  | 19.28  | 17.45  |
| 0.02    | -0.84  | -2.60  | 0.01   | -2.81  | -1.32  | 0.42   | -2.61  | -0.58  | -1.55  | -1.85  | -1.49   | -1.30  | -1.90  | -0.14  | -5.59  | -11.16 | -8.86  | -4.30  | -1.55  | -4.50  | -4.58  | -6.53  | -16.29 | -20.40 | -6.89  | -8.94  | -13.97 |
| -1.12   | 2.09   | 1.22   | 0.24   | 0.31   | -0.19  | -0.16  | -0.63  | -1.74  | 0.44   | -0.76  | -0.15   | -0.66  | -0.51  | -0.08  | -1.07  | 0.88   | 2.51   | 0.58   | 0.24   | 1.34   | 0.66   | -0.15  | 0.27   | 1.49   | 0.77   | 1.00   | 0.28   |
| -5.13   | -4.57  | -3.99  | -1.96  | -4.01  | -3.48  | -3.36  | -2.70  | -3.20  | -3.15  | -4.73  | -4.54   | -3.99  | -2.03  | -1.09  | -2.84  | -0.21  | 0.23   | -0.92  | -2.10  | -1.36  | -1.99  | -1.49  | -2.72  | -2.92  | -2.92  | -1.73  | -1.73  |
| -16.64  | -13.16 | -17.99 | -8.79  | -15.45 | -13.53 | -10.71 | -10.65 | -14.37 | -13.65 | -13.78 | -16.80  | -16.98 | -6.90  | -6.89  | -10.84 | -8.51  | -4.21  | -5.22  | -6.08  | -8.87  | -7.53  | -7.18  | -5.03  | -10.53 | -6.20  | -7.08  | -8.90  |
| 11.64   | 10.10  | 10.62  | 11.32  | 11.30  | 10.29  | 14.63  | 10.80  | 8.21   | 11.03  | 11.28  | 12.82   | 12.02  | 7.68   | 14.00  | 5.24   | -8.26  | 0.04   | 4.03   | 2.71   | 7.17   | 14.47  | 5.54   | -5.96  | -0.78  | -3.52  | 3.59   | 0.76   |
| 14.41   | 9.70   | 11.53  | 14.23  | 10.37  | 10.62  | 12.74  | 9.72   | 10.70  | 11.13  | 10.88  | 13.05   | 12.32  | 8.26   | 11.97  | 4.42   | -10.83 | -1.70  | 4.46   | 0.97   | 5.61   | 12.84  | 6.18   | -7.68  | -2.36  | -5.69  | 4.54   | -0.33  |
| -5.54   | -5.83  | -3.98  | -7.06  | -3.11  | -6.42  | -7.74  | -5.54  | -6.21  | -5.06  | -5.82  | -5.91   | -7.03  | -7.68  | -7.96  | -6.28  | -8.83  | -8.36  | -8.07  | -5.15  | -5.28  | -8.41  | -6.15  | -6.97  | -9.56  | -8.08  | -8.77  | -9.10  |
| 1.96    | 2.78   | 2.01   | -0.01  | -3.61  | -1.26  | 0.11   | 0.05   | -0.79  | 1.57   | -0.18  | 0.34    | 0.24   | -0.25  | 0.49   | -0.39  | -2.02  | 2.83   | 0.74   | 1.37   | -1.39  | 0.16   | -1.14  | -1.14  | 1.05   | -1.33  | -2.35  | -1.36  |
| 0.97    | 0.80   | 1.49   | 0.01   | 0.84   | -0.08  | -0.30  | 0.01   | -0.50  | 0.17   | 0.72   | -1.09   | 1.02   | -0.87  | -1.63  | -3.27  | -3.20  | 1.45   | 1.19   | -0.68  | -3.17  | -0.90  | 0.08   | -1.92  | -1.26  | -0.76  | -1.21  | -2.04  |
| 1.61    | 2.27   | 3.65   | 4.39   | 2.23   | 2.19   | 1.67   | 3.05   | 2.92   | 1.63   | 0.01   | 2.19    | 1.64   | 2.41   | 3.34   | 1.92   | -2.67  | 3.77   | 1.43   | 2.01   | 4.35   | 3.14   | 1.43   | 2.67   | 3.98   | 0.97   | 2.68   | 3.02   |
| 18.10   | 23.28  | 21.95  | 15.55  | 22.50  | 14.66  | 14.12  | 17.90  | 15.37  | 17.35  | 17.15  | 14.67   | 16.31  | 8.14   | 10.33  | 9.63   | 9.72   | 18.05  | 12.92  | 8.99   | 9.00   | 9.06   | 6.50   | 2.92   | 10.36  | 5.47   | 6.88   | 7.22   |
| 44.74   | 40.94  | 40.87  | 36.64  | 41.21  | 39.77  | 32.81  | 42.38  | 35.94  | 41.66  | 46.44  | 42.19   | 49.58  | 19.37  | 17.19  | 11.48  | -0.95  | 10.17  | 25.28  | 5.76   | 18.78  | 18.88  | 10.50  | -4.88  | 0.97   | -3.59  | 8.43   | -3.01  |
| -15.58  | -18.72 | -18.02 | -14.75 | -16.80 | -20.14 | -19.50 | -21.48 | -16.19 | -14.64 | -20.86 | -14.61  | -22.16 | -11.32 | -7.66  | -15.98 | -19.41 | -21.41 | -9.38  | -14.12 | -12.45 | -6.76  | -16.66 | -25.08 | -24.67 | -23.37 | -17.44 | -22.17 |
| -70.90  | -40.92 | -58.50 | -45.68 | -36.16 | -37.27 | -58.47 | -35.31 | -42.75 | -44.40 | -54.75 | -61.84  | -56.72 | -32.49 | -36.72 | -18.23 | -25.28 | -7.75  | -24.72 | -20.14 | -43.66 | -35.39 | -26.62 | -19.34 | -19.07 | -23.40 | -24.84 | -22.36 |
| -86.17  | -57.17 | -74.44 | -59.21 | -50.04 | -51.12 | -75.31 | -50.38 | -54.25 | -58.86 | -69.74 | -80.55  | -69.90 | -43.12 | -50.37 | -29.67 | -33.54 | -11.76 | -33.29 | -25.55 | -55.66 | -45.42 | -36.45 | -29.75 | -24.83 | -28.02 | -33.52 | -32.26 |
| -100.53 | -74.40 | -89.23 | -76.02 | -65.15 | -66.68 | -91.63 | -69.57 | -70.95 | -77.33 | -89.80 | -101.33 | -85.63 | -57.35 | -65.82 | -40.13 | -48.59 | -16.19 | -44.72 | -32.85 | -64.51 | -57.72 | -46.19 | -37.47 | -33.14 | -31.59 | -44.26 | -41.71 |
| 9.51    | 9.00   | 8.86   | 9.35   | 11.68  | 10.69  | 14.58  | 11.48  | 6.28   | 8.06   | 9.90   | 9.75    | 10.36  | 11.80  | 15.02  | 8.63   | 3.88   | 6.50   | 7.31   | 7.43   | 13.53  | 13.19  | 10.63  | -1.89  | -13.75 | 3.77   | 8.40   | 2.28   |
| 10.68   | 9.07   | 9.76   | 9.81   | 10.56  | 10.41  | 13.41  | 10.14  |        |        |        |         |        |        |        |        |        |        |        |        |        |        |        |        |        |        |        |        |
